# Supplementary material
Source: Research Square preprint supplement (doi:10.21203/rs.3.rs-10057385/v1)

# *Supplementary Information for*

## **Nitrene-Triggered Carbocationic Rearrangement of Tetrasubstituted Alkenes Enables Divergent Access to Fused $\delta$ -Lactams**

Qian-Kun Fan<sup>‡a</sup>, Guang-Chuan Xu<sup>‡a</sup>, He Ma<sup>a</sup>, Chuan-Kai Yu<sup>a</sup>, Bo-Yang Sun<sup>a</sup>, Gang He<sup>a</sup>,

Gong Chen<sup>a</sup>, Hao Wang<sup>\*a</sup>

*State Key Laboratory and Institute of Elemento-Organic Chemistry, College of Chemistry, Frontiers Science Center for New Organic Matter, Nankai University, Tianjin 300071, China.*

|                                                                                                                              |     |
|------------------------------------------------------------------------------------------------------------------------------|-----|
| 1. General information .....                                                                                                 | 2   |
| 2. Preparation of dioxazolone substrates .....                                                                               | 3   |
| 3. Optimization of reaction conditions.....                                                                                  | 18  |
| 4. General procedure for nitrene-triggered carbocationic rearrangement.....                                                  | 22  |
| 5. Transformations of $\delta$ -lactams .....                                                                                | 62  |
| 6. X-ray crystallographic data.....                                                                                          | 70  |
| 7. Computational Details .....                                                                                               | 80  |
| 8. Reference .....                                                                                                           | 107 |
| 9. NMR Spectra .....                                                                                                         | 110 |
| 10. Checkcif of compound <b>3a</b> 、 <b>4a</b> 、 <b>5c</b> 、 <b>5q</b> 、 <b>6f</b> 、 <b>7a</b> 、 <b>7b</b> 、 <b>7c</b> ..... | 328 |

## 1. General information

### Reagents:

All commercial materials were used as received unless otherwise noted. Analytical thin layer chromatography (TLC) was performed on silica gel Huanghai HSGF254 plates and visualization of the developed chromatogram was performed by fluorescence quenching ( $\lambda_{\text{max}}=254$  nm) or using iodine stain. Flash chromatography was performed using Silica gel (200-300 mesh) purchased from Qingdao Haiyang Chemical Co. China, and SiliCycle Inc. (SiliaFlash P60, 40-63  $\mu\text{m}$ , 60 Å from Canada).  $[\text{Cp}^*\text{IrCl}_2]_2$  was synthesized following a reported procedure using  $\text{IrCl}_3 \cdot x\text{H}_2\text{O}$  (J&K Scientific). All starting materials were commercially available (from Le yan, Adamas-beta<sup>®</sup>, Energy Chemical, J&K Scientific, Macklin, Shanghai Bidepharm, Innochem, Aladdin, Meryer, Sigma-Aldrich, TCI, Alfa Aesar, and FUSION (Lenalidomide, No: FZ-0016359-1g)).

### Instruments:

NMR spectra were recorded on Bruker AVANCE AV 400 instruments at <sup>1</sup>H NMR (400 MHz), <sup>13</sup>C NMR (101 MHz), <sup>19</sup>F NMR (376 MHz) and all NMR spectra were processed using MestReNova software, reported in units, parts per million (ppm), using residual solvent peaks (chloroform ( $\delta = 7.26$  ppm) or DMSO ( $\delta = 2.50$  ppm) or CH<sub>3</sub>OH ( $\delta = 3.31$  ppm) for <sup>1</sup>H NMR, chloroform ( $\delta = 77.16$  ppm) or DMSO ( $\delta = 39.52$  ppm) or CH<sub>3</sub>OH ( $\delta = 49.00$  ppm) for <sup>13</sup>C NMR) as internal reference. All coupling constants (J values) were reported in Hertz (Hz). Multiplicities were recorded as: s = singlet, d = doublet, dd = doublet of doublet, ddd = doublet of doublet of doublet, dt = doublet of triplet, t = triplet, q = quartet, p = pentet, hept = heptet, m = Multiplet, br = broad. High-resolution ESI mass experiments were operated on a Q Exactive™ Focus Hybrid Quadrupole-Orbitrap™ Mass Spectrometer instrument.

## 2. Preparation of dioxazolone substrates

**General procedure A** for preparation of dioxazolone substrates **1a-1v**:

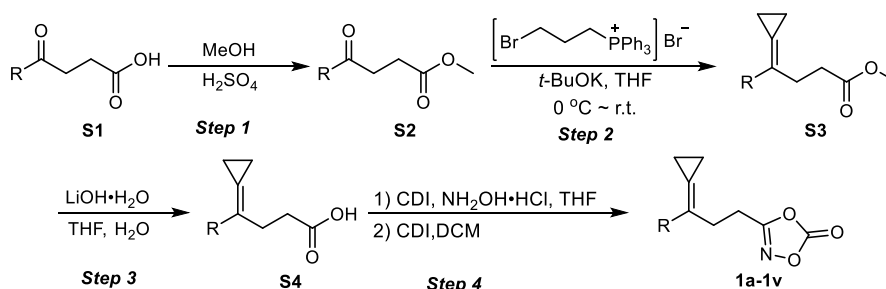

**Supplementary Figure 1.** The preparation of dioxazolone substrates

The starting substrates **S1** were prepared following the reported literature<sup>[1]</sup> procedure in a three steps sequence.

**Step 1.** A 100 mL flask was charged with **S1** (10 mmol, 1.0 equiv.), followed by the addition of MeOH (50 mL) under air. Then, H<sub>2</sub>SO<sub>4</sub> (2 mL) was added to the mixture slowly. The reaction mixture was heated to 80 °C under reflux and stirred continuously for 4 hours. Upon completion of the reaction, the solvent was removed under reduced pressure. To the mixture was added DCM (30 mL), followed by quenching with saturated sodium bicarbonate solution until gas evolution ceased. The aqueous phase was extracted with DCM (30 mL × 3). The combined organic layers were washed with brine, dried over anhydrous sodium sulfate, filtered, and concentrated in vacuo. The crude product **S2** was obtained without further purification.

**Step 2.** A solution of 3-bromopropyltriphenylphosphonium bromide (12 mmol, 1.2 equiv.) and *t*-BuOK (25 mmol, 2.5 equiv.) in 100 mL THF was stirred at 75 °C under Ar for 1 hour. Afterward, a solution of compound **S2** (10 mmol, 1.0 equiv.) in 10 mL THF was added, and the reaction solution was stirred at 75 °C for 8 hours. Upon completion, the reaction was cooled to room temperature, and the mixture was filtered through a Celite. The filtrate was concentrated under reduced pressure, and the residue was purified by silica gel chromatography (EtOAc/hexane) to afford the corresponding products **S3** in 30% to 80% yields.

*Note:* 3-bromopropyltriphenylphosphonium bromide was commercially available (from Cat No. 1030808, Leyan, Shanghai, China).

**Step 3.** A mixture of **S3** (5.0 mmol) and LiOH·H<sub>2</sub>O (25 mmol, 5.0 equiv.) in THF/H<sub>2</sub>O (v:v = 1:1, 30 mL), and the reaction mixture was stirred at room temperature for 8 hours. Upon completion of the reaction, the mixture was diluted with ethyl acetate (10 mL) and extracted with water (20 mL × 3). The combined aqueous layers were acidified to pH 2 with 2 M hydrochloric acid and then extracted with dichloromethane (20 mL × 3). The organic extracts were dried over anhydrous Na<sub>2</sub>SO<sub>4</sub>, concentrated under reduced pressure, and afforded the product **S4** in high yield without further purification.

**Step 4.** The substrates **1a-1v** were prepared following the reported literature<sup>[2]</sup> procedure in a two-step sequence. 1,1'-Carbonyldiimidazole (CDI, 6 mmol, 1.5 equiv.) was added to a mixture of carboxylic acid **S4** (4 mmol, 1.0 equiv.) in dry THF (30 mL) at room temperature. The reaction mixture was stirred for 1-2 hours. Afterward, Hydroxylamine hydrochloride (NH<sub>2</sub>OH·HCl, 8 mmol, 2.0 equiv.) was added. The resulting mixture was stirred overnight. The reaction mixture was diluted with 5% aq. KHSO<sub>4</sub> (20 mL) and extracted with ethyl acetate (15 mL × 2). The combined organic layers were washed with brine, dried over Na<sub>2</sub>SO<sub>4</sub>, filtrated and concentrated in vacuo. The crude material was purified by silica gel chromatography eluted with DCM/MeOH to afford hydroxamic acid. Then to a stirred solution of hydroxamic acid (1.0, mmol, 1.0 equiv.) in DCM (2 mL), CDI (1.2 mmol, 1.2 equiv.) was added at room temperature. After being stirred for 30 minutes, the reaction mixture was quenched with 1 N HCl (20 mL), and extracted with DCM (15 mL × 3). The combined organic layers were washed with brine, dried over Na<sub>2</sub>SO<sub>4</sub>, filtrated and concentrated. The crude material was purified by silica gel chromatography eluted with petroleum ether/EtOAc to afford product **1a-1v**.

**General procedure B** for preparation of dioxazolone substrates **1w-1y**:

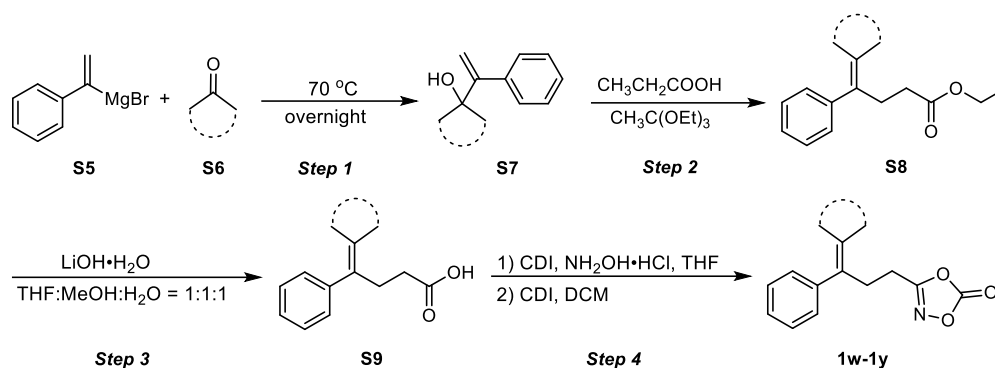

**Step 1.** Under an argon atmosphere, a 100 mL three-necked flask was charged with **S6** (20 mmol, 1.0 equiv.), followed by the addition of anhydrous THF (30 mL). The mixture was then heated to reflux at 70 °C, and **S5** (22 mmol, 1.1 equiv.) was added dropwise. The reaction mixture was stirred at this temperature overnight. Upon completion, the reaction was quenched with saturated aqueous ammonium chloride. The aqueous phase was extracted with ethyl acetate (30 mL  $\times$  3). The combined organic layers were washed with brine, dried over anhydrous sodium sulfate, filtered, and concentrated under reduced pressure. The residue was purified by silica gel column chromatography (EtOAc/hexane) to afford the corresponding product **S7** in 40 - 60% yield.

**Step 2.** Under air, **S7** (10 mmol, 1.0 equiv.) was dissolved in triethyl orthoacetate (100 mmol, 10.0 equiv.), and a catalytic amount of propionic acid (1 mmol, 0.1 equiv.) was added. The mixture was heated to 150 °C and stirred for approximately 5 hours. Upon completion of the reaction as monitored by TLC, the mixture was quenched with 1N HCl. The aqueous phase was extracted with ethyl acetate (30 mL  $\times$  3). The combined organic layers were washed with brine, dried over anhydrous sodium sulfate, filtered, and concentrated under reduced pressure. The residue was purified by silica gel column chromatography (EtOAc/hexane) to afford the corresponding product **S8** in 30 - 50% yield.

**Step 3.** A mixture of **S8** (5.0 mmol) and  $\text{LiOH}\cdot\text{H}_2\text{O}$  (25 mmol, 5.0 equiv.) in THF/MeOH/ $\text{H}_2\text{O}$  (v:v:v = 1:1:1, 45 mL), and the reaction mixture was stirred at 60 °C for 8 hours. Upon completion of the reaction, the mixture was diluted with ethyl acetate

(10 mL) and extracted with water (20 mL × 3). The combined aqueous layers were acidified to pH 2 with 2 M hydrochloric acid and then extracted with dichloromethane (20 mL × 3). The organic extracts were dried over anhydrous Na<sub>2</sub>SO<sub>4</sub>, concentrated under reduced pressure, and afforded the product **S9** in high yield without further purification.

**Step 4.** The substrates **1w-1y** were prepared following the reported literature<sup>[2]</sup> procedure in a two-step sequence. 1,1'-Carbonyldiimidazole (CDI, 6 mmol, 1.5 equiv.) was added to a mixture of carboxylic acid **S9** (4 mmol, 1.0 equiv.) in dry THF (30 mL) at room temperature. The reaction mixture was stirred for 1-2 hours. Afterward, Hydroxylamine hydrochloride (NH<sub>2</sub>OH·HCl, 8 mmol, 2.0 equiv.) was added. The resulting mixture was stirred overnight. The reaction mixture was diluted with 5% aq. KHSO<sub>4</sub> (20 mL) and extracted with ethyl acetate (15 mL × 2). The combined organic layers were washed with brine, dried over Na<sub>2</sub>SO<sub>4</sub>, filtrated and concentrated in vacuo. The crude material was purified by silica gel chromatography eluted with DCM/MeOH to afford hydroxamic acid. Then to a stirred solution of hydroxamic acid (1 mmol, 1.0 equiv.) in DCM (2 mL), CDI (1.2 mmol, 1.2 equiv.) was added at room temperature. After being stirred for 30 minutes, the reaction mixture was quenched with 1N HCl (20 mL), and extracted with DCM (15 mL × 3). The combined organic layers were washed with brine, dried over Na<sub>2</sub>SO<sub>4</sub>, filtrated and concentrated. The crude material was purified by silica gel chromatography eluted with petroleum ether/EtOAc to afford product **1w-1y**.

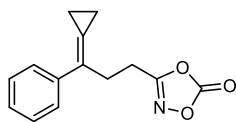

**1a**

Compound **1a** is a previously known compound and was synthesized in 30% yield following the **general procedure A**.

White solid. ( $R_f$  = 0.60, PE/EA = 10:1, v/v)

$^1\text{H NMR}$  (400 MHz, Chloroform-*d*)  $\delta$  7.41 (d,  $J$  = 7.6 Hz, 2H), 7.24 (t,  $J$  = 7.6 Hz, 2H), 7.19 – 7.09 (m, 1H), 2.95 (t,  $J$  = 7.7 Hz, 2H), 2.75 (t,  $J$  = 7.6 Hz, 2H), 1.30 (t,  $J$  = 8.0 Hz, 2H), 1.08 (t,  $J$  = 8.0 Hz, 2H).

$^{13}\text{C NMR}$  (101 MHz, Chloroform-*d*)  $\delta$  166.51, 154.23, 138.65, 128.66, 127.30, 125.90, 124.29, 123.43, 29.00, 24.05, 4.81, 1.62.

**HRMS** (ESI)  $m/z$  Calcd for  $\text{C}_{14}\text{H}_{14}\text{NO}_3^+[\text{M}+\text{H}]^+$ : 244.0968, found: 244.0970.

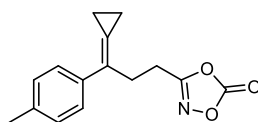

**1b**

Compound **1b** is a previously unknown compound and was synthesized in 33% yield following the **general procedure A**.

White solid. ( $R_f$  = 0.70, PE/EA = 10:1, v/v)

$^1\text{H NMR}$  (400 MHz, Chloroform-*d*)  $\delta$  7.47 (d,  $J$  = 7.9 Hz, 2H), 7.20 (d,  $J$  = 7.9 Hz, 2H), 3.08 (t,  $J$  = 7.7 Hz, 2H), 2.89 (t,  $J$  = 7.6 Hz, 2H), 2.38 (s, 3H), 1.43 (t,  $J$  = 8.0 Hz, 2H), 1.21 (t,  $J$  = 8.0 Hz, 2H).

$^{13}\text{C NMR}$  (101 MHz, Chloroform-*d*)  $\delta$  166.55, 154.24, 137.03, 135.74, 129.32, 125.76, 124.08, 122.33, 28.98, 24.02, 21.16, 4.72, 1.52.

**HRMS** (ESI)  $m/z$  Calcd for  $\text{C}_{15}\text{H}_{16}\text{NO}_3^+[\text{M}+\text{H}]^+$ : 258.1125, found: 258.1128.

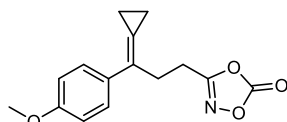

**1c**

Compound **1c** is a previously unknown compound and was synthesized in 40% yield following the **general procedure A**.

Gray solid. ( $R_f = 0.60$ , PE/EA = 10:1, v/v)

$^1\text{H NMR}$  (400 MHz, Chloroform-*d*)  $\delta$  7.48 (d,  $J = 8.8$  Hz, 2H), 6.91 (d,  $J = 8.9$  Hz, 2H), 3.82 (s, 3H), 3.04 (t,  $J = 7.9$  Hz, 2H), 2.88 (t,  $J = 7.6$  Hz, 2H), 1.40 (t,  $J = 8.0$  Hz, 2H), 1.18 (t,  $J = 8.0$  Hz, 2H).

$^{13}\text{C NMR}$  (101 MHz, Chloroform-*d*)  $\delta$  166.56, 158.86, 154.26, 131.17, 127.00, 123.65, 121.29, 114.02, 55.40, 29.07, 24.06, 4.72, 1.55.

**HRMS** (ESI)  $m/z$  Calcd for  $\text{C}_{15}\text{H}_{16}\text{NO}_4^+[\text{M}+\text{H}]^+$ : 274.1074, found: 274.1073.

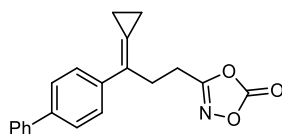

**1d**

Compound **1d** is a previously unknown compound and was synthesized in 34% yield following the **general procedure A**.

White solid. ( $R_f = 0.40$ , PE/EA = 10:1, v/v)

$^1\text{H NMR}$  (400 MHz, Chloroform-*d*)  $\delta$  7.67 – 7.58 (m, 6H), 7.47 (t,  $J = 7.6$  Hz, 2H), 7.37 (t,  $J = 7.3$  Hz, 1H), 3.12 (t,  $J = 7.6$  Hz, 2H), 2.93 (t,  $J = 7.6$  Hz, 2H), 1.49 (t,  $J = 8.0$  Hz, 2H), 1.24 (t,  $J = 7.0$  Hz, 2H).

$^{13}\text{C NMR}$  (101 MHz, Chloroform-*d*)  $\delta$  166.51, 154.24, 140.67, 140.03, 137.56, 128.93, 127.47, 127.33, 127.05, 126.27, 123.91, 123.64, 28.95, 24.09, 4.94, 1.66.

**HRMS** (ESI)  $m/z$  Calcd for  $\text{C}_{20}\text{H}_{18}\text{NO}_3^+[\text{M}+\text{H}]^+$ : 320.1281, found: 320.1279.

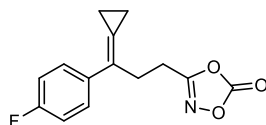

**1e**

Compound **1e** is a previously unknown compound and was synthesized in 26% yield following the **general procedure A**.

Yellow solid. ( $R_f = 0.40$ , PE/EA = 10:1, v/v)

$^1\text{H NMR}$  (400 MHz, Chloroform-*d*)  $\delta$  7.55 – 7.48 (m, 2H), 7.09 – 7.01 (m, 2H), 3.05 (t,  $J = 8.0$  Hz, 2H), 2.88 (t,  $J = 8.0$  Hz, 2H), 1.40 (t,  $J = 8.0$  Hz, 2H), 1.22 (t,  $J = 8.0$  Hz, 2H).

$^{13}\text{C}$  NMR (101 MHz, Chloroform-*d*)  $\delta$  166.43, 162.02 (d,  $J = 247.9$  Hz), 154.18, 134.82, 127.47 (d,  $J = 8.0$  Hz), 123.33, 123.16 (d,  $J = 1.9$  Hz), 115.46 (d,  $J = 20.8$  Hz), 29.01, 23.88, 4.62, 1.75.

$^{19}\text{F}$  NMR (376 MHz, Chloroform-*d*)  $\delta$  -115.13.

HRMS (ESI)  $m/z$  Calcd for  $\text{C}_{14}\text{H}_{13}\text{FNO}_3^+[\text{M}+\text{H}]^+$ : 262.0874, found: 262.0872.

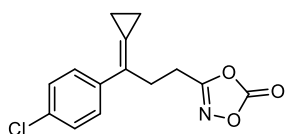

**1f**

Compound **1f** is a previously unknown compound and was synthesized in 30% yield following the **general procedure A**.

Yellow solid. ( $R_f = 0.40$ , PE/EA = 10:1, v/v)

$^1\text{H}$  NMR (400 MHz, Chloroform-*d*)  $\delta$  7.47 (d,  $J = 8.6$  Hz, 2H), 7.33 (d,  $J = 8.6$  Hz, 2H), 3.05 (t,  $J = 8.0$  Hz, 2H), 2.88 (t,  $J = 8.0$  Hz, 2H), 1.41 (t,  $J = 8.0$  Hz, 2H), 1.22 (t,  $J = 8.0$  Hz, 2H).

$^{13}\text{C}$  NMR (101 MHz, Chloroform-*d*)  $\delta$  166.35, 154.16, 137.14, 133.00, 128.78, 127.14, 124.21, 123.30, 28.83, 23.90, 4.78, 1.78.

HRMS (ESI)  $m/z$  Calcd for  $\text{C}_{14}\text{H}_{13}\text{ClNO}_3^+[\text{M}+\text{H}]^+$ : 278.0578, found: 278.0580.

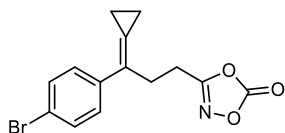

**1g**

Compound **1g** is a previously unknown compound and was synthesized in 39% yield following the **general procedure A**.

Yellow solid. ( $R_f = 0.40$ , PE/EA = 10:1, v/v)

$^1\text{H}$  NMR (400 MHz, Chloroform-*d*)  $\delta$  7.48 (d,  $J = 8.6$  Hz, 2H), 7.41 (d,  $J = 8.6$  Hz, 2H), 3.04 (t,  $J = 7.6$  Hz, 2H), 2.88 (t,  $J = 7.6$  Hz, 2H), 1.41 (t,  $J = 7.6$  Hz, 2H), 1.21 (t,  $J = 7.6$  Hz, 2H).

$^{13}\text{C}$  NMR (101 MHz, Chloroform-*d*)  $\delta$  166.33, 154.14, 137.59, 131.73, 127.47, 124.35, 123.36, 121.16, 28.77, 23.89, 4.80, 1.80.

**HRMS** (ESI)  $m/z$  Calcd for  $C_{14}H_{13}BrNO_3^+[M+H]^+$ : 322.0073, found: 322.0068.

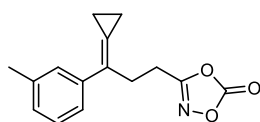

**1h**

Compound **1h** is a previously unknown compound and was synthesized in 37% yield following the **general procedure A**.

White solid. ( $R_f$  = 0.70, PE/EA = 10:1, v/v)

**$^1H$  NMR** (400 MHz, Chloroform-*d*)  $\delta$  7.33 – 7.31 (m, 2H), 7.25 – 7.20 (m, 1H), 7.07 (d,  $J$  = 7.5 Hz, 1H), 3.05 (t,  $J$  = 8.0 Hz, 2H), 2.86 (t,  $J$  = 7.6 Hz, 2H), 2.36 (s, 3H), 1.40 (t,  $J$  = 8.0 Hz, 2H), 1.18 (t,  $J$  = 8.0 Hz, 2H).

**$^{13}C$  NMR** (101 MHz, Chloroform-*d*)  $\delta$  166.55, 154.26, 138.63, 138.20, 128.56, 128.09, 126.58, 124.35, 123.18, 123.09, 29.08, 24.10, 21.72, 4.81, 1.63.

**HRMS** (ESI)  $m/z$  Calcd for  $C_{15}H_{16}NO_3^+[M+H]^+$ : 258.1125, found: 258.1123.

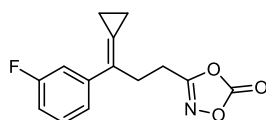

**1i**

Compound **1i** is a previously unknown compound and was synthesized in 21% yield following the **general procedure A**.

Yellow solid. ( $R_f$  = 0.40, PE/EA = 10:1, v/v)

**$^1H$  NMR** (400 MHz, Chloroform-*d*)  $\delta$  7.34 – 7.23 (m, 3H), 6.95 (t,  $J$  = 8.3 Hz, 1H), 3.04 (t,  $J$  = 7.7 Hz, 2H), 2.88 (t,  $J$  = 7.6 Hz, 2H), 1.43 (t,  $J$  = 7.7 Hz, 2H), 1.23 (d,  $J$  = 7.9 Hz, 2H).

**$^{13}C$  NMR** (101 MHz, Chloroform-*d*)  $\delta$  166.36, 163.21 (d,  $J$  = 237.4 Hz), 154.18, 141.05, 130.13 (d,  $J$  = 8.4 Hz), 124.97, 123.42 (d,  $J$  = 2.9 Hz), 121.38 (d,  $J$  = 2.7 Hz), 114.17 (d,  $J$  = 21.3 Hz), 112.88 (d,  $J$  = 22.6 Hz), 28.90, 23.98, 4.89, 1.74.

**$^{19}F$  NMR** (376 MHz, Chloroform-*d*)  $\delta$  -112.95.

**HRMS** (ESI)  $m/z$  Calcd for  $C_{14}H_{13}FNO_3^+[M+H]^+$ : 262.0874, found: 262.0872.

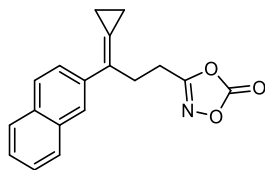

### 1j

Compound **1j** is a previously unknown compound and was synthesized in 35% yield following the **general procedure A**.

White solid. ( $R_f$  = 0.30, PE/EA = 10:1, v/v)

$^1\text{H NMR}$  (400 MHz, Chloroform-*d*)  $\delta$  9.54 – 9.38 (m, 5H), 9.14 – 9.06 (m, 2H), 4.81 (t,  $J$  = 7.7 Hz, 2H), 4.55 (t,  $J$  = 8.0 Hz, 2H), 3.12 (t,  $J$  = 8.0 Hz, 2H), 2.87 (d,  $J$  = 12.0 Hz, 2H).

$^{13}\text{C NMR}$  (101 MHz, Chloroform-*d*)  $\delta$  166.53, 154.24, 136.03, 133.54, 132.67, 128.23, 128.20, 127.68, 126.43, 126.09, 124.62, 124.33, 124.27, 124.00, 29.05, 24.11, 5.15, 1.72.

**HRMS** (ESI)  $m/z$  Calcd for  $\text{C}_{18}\text{H}_{16}\text{NO}_3^+[\text{M}+\text{H}]^+$ : 294.1125, found: 294.1128.

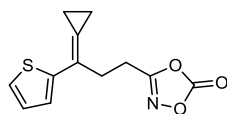

### 1k

Compound **1k** is a previously unknown compound and was synthesized in 26% yield following the **general procedure A**.

Yellow solid. ( $R_f$  = 0.30, PE/EA = 10:1, v/v)

$^1\text{H NMR}$  (400 MHz, Chloroform-*d*)  $\delta$  7.24 – 7.19 (m, 1H), 7.09 – 6.96 (m, 2H), 3.07 – 2.98 (m, 4H), 1.41 – 1.30 (m, 4H).

$^{13}\text{C NMR}$  (101 MHz, Chloroform-*d*)  $\delta$  166.38, 154.18, 144.53, 127.21, 124.92, 122.07, 122.04, 120.00, 28.80, 23.95, 5.00, 3.31.

**HRMS** (ESI)  $m/z$  Calcd for  $\text{C}_{12}\text{H}_{12}\text{NO}_3\text{S}^+[\text{M}+\text{H}]^+$ : 250.0532, found: 250.0528.

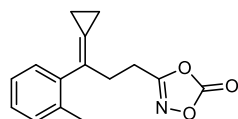

**1l**

Compound **1l** is a previously unknown compound and was synthesized in 27% yield following the **general procedure A**.

White solid. ( $R_f$  = 0.70, PE/EA = 10:1, v/v)

$^1\text{H NMR}$  (400 MHz, Chloroform-*d*)  $\delta$  7.16 – 7.05 (m, 3H), 7.05 – 6.97 (m, 1H), 2.84 (t,  $J$  = 7.5 Hz, 2H), 2.69 (t,  $J$  = 7.4 Hz, 2H), 2.14 (s, 3H), 1.16 (t,  $J$  = 8.4 Hz, 2H), 0.96 (t,  $J$  = 7.6 Hz, 2H).

$^{13}\text{C NMR}$  (101 MHz, Chloroform-*d*)  $\delta$  166.54, 154.19, 140.19, 135.76, 130.50, 128.50, 127.32, 125.82, 125.75, 123.65, 31.60, 23.63, 19.92, 3.29, 2.98.

**HRMS** (ESI)  $m/z$  Calcd for  $\text{C}_{15}\text{H}_{16}\text{NO}_3^+[\text{M}+\text{H}]^+$ : 258.1125, found: 258.1134.

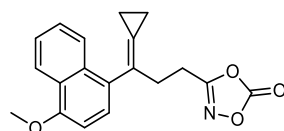

**1m**

Compound **1m** is a previously unknown compound and was synthesized in 40% yield following the **general procedure A**.

Gray solid. ( $R_f$  = 0.50, PE/EA = 10:1, v/v)

$^1\text{H NMR}$  (400 MHz, Chloroform-*d*)  $\delta$  8.39 – 8.32 (m, 1H), 7.80 – 7.72 (m, 1H), 7.52 (dt,  $J$  = 6.8, 3.4 Hz, 2H), 7.28 (s, 1H), 6.85 (d,  $J$  = 7.8 Hz, 1H), 4.05 (s, 3H), 3.10 (t,  $J$  = 7.5 Hz, 2H), 2.80 (t,  $J$  = 7.5 Hz, 2H), 1.37 (t,  $J$  = 8.0 Hz, 2H), 1.07 (t,  $J$  = 8.0 Hz, 2H).

$^{13}\text{C NMR}$  (101 MHz, Chloroform-*d*)  $\delta$  166.59, 155.00, 154.24, 132.28, 130.71, 126.57, 125.93, 125.72, 125.24, 125.23, 124.88, 124.62, 122.58, 103.34, 55.63, 32.32, 23.82, 3.38, 3.31.

**HRMS** (ESI)  $m/z$  Calcd for  $\text{C}_{19}\text{H}_{18}\text{NO}_4^+[\text{M}+\text{H}]^+$ : 324.1230, found: 324.1237.

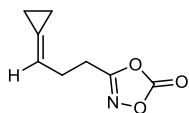

**1n**

Compound **1n** is a previously unknown compound and was synthesized in 15% yield following the **general procedure A**.

Light yellow oil. ( $R_f = 0.70$ , PE/EA = 10:1, v/v)

$^1\text{H NMR}$  (400 MHz, Chloroform-*d*)  $\delta$  5.79 – 5.75 (m, 1H), 2.79 (t,  $J = 7.4$  Hz, 2H), 2.61 – 2.56 (m, 2H), 1.05 (s, 4H).

$^{13}\text{C NMR}$  (101 MHz, Chloroform-*d*)  $\delta$  166.57, 154.30, 124.93, 114.04, 26.74, 24.65, 2.29, 2.15.

**HRMS** (ESI)  $m/z$  Calcd for  $\text{C}_8\text{H}_{10}\text{NO}_3^+[\text{M}+\text{H}]^+$ : 168.0655, found: 168.0647.

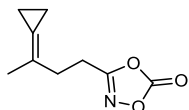

**1o**

Compound **1o** is a previously unknown compound and was synthesized in 30% yield following the **general procedure A**.

Colorless oil. ( $R_f = 0.70$ , PE/EA = 10:1, v/v)

$^1\text{H NMR}$  (400 MHz, Chloroform-*d*)  $\delta$  2.87 (t,  $J = 7.6$  Hz, 2H), 2.55 (t,  $J = 7.7$  Hz, 2H), 1.84 (s, 3H), 1.11 – 1.04 (m, 2H), 1.00 – 0.94 (m, 2H).

$^{13}\text{C NMR}$  (101 MHz, Chloroform-*d*)  $\delta$  166.79, 154.33, 120.64, 118.09, 31.32, 23.19, 20.74, 3.32, 1.42.

**HRMS** (ESI)  $m/z$  Calcd for  $\text{C}_9\text{H}_{12}\text{NO}_3^+[\text{M}+\text{H}]^+$ : 182.0812, found: 182.0819.

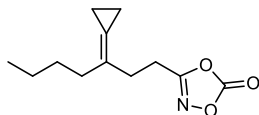

**1p**

Compound **1p** is a previously unknown compound and was synthesized in 22% yield following the **general procedure A**.

Light yellow oil. ( $R_f = 0.70$ , PE/EA = 10:1, v/v)

**<sup>1</sup>H NMR** (400 MHz, Chloroform-*d*) δ 2.85 (t, *J* = 7.6 Hz, 2H), 2.52 (t, *J* = 7.8 Hz, 2H), 2.15 (t, *J* = 7.7 Hz, 2H), 1.48 – 1.40 (m, 2H), 1.27 (dt, *J* = 14.9, 7.4 Hz, 2H), 1.01 (d, *J* = 5.2 Hz, 4H), 0.88 (t, *J* = 7.3 Hz, 3H).

**<sup>13</sup>C NMR** (101 MHz, Chloroform-*d*) δ 166.88, 154.33, 124.75, 117.49, 34.88, 29.89, 29.68, 23.39, 22.58, 14.03, 2.46, 1.74.

**HRMS** (ESI) *m/z* Calcd for C<sub>12</sub>H<sub>18</sub>NO<sub>3</sub><sup>+</sup>[M+H]<sup>+</sup>: 224.1281, found: 224.1284.

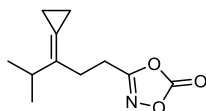

**1q**

Compound **1q** is a previously unknown compound and was synthesized in 35% yield following the **general procedure A**.

Yellow solid. (*R<sub>f</sub>* = 0.70, PE/EA = 10:1, v/v)

**<sup>1</sup>H NMR** (400 MHz, Chloroform-*d*) δ 2.92 – 2.85 (m, 2H), 2.57 – 2.52 (m, 2H), 2.50 – 2.43 (m, 1H), 1.24 – 1.19 (m, 1H), 1.09 (s, 3H), 1.08 (s, 4H), 1.00 – 0.95 (m, 2H).

**<sup>13</sup>C NMR** (101 MHz, Chloroform-*d*) δ 166.94, 154.36, 130.13, 115.48, 34.11, 28.07, 23.69, 21.49, 2.13, 1.15.

**HRMS** (ESI) *m/z* Calcd for C<sub>11</sub>H<sub>16</sub>NO<sub>3</sub><sup>+</sup>[M+H]<sup>+</sup>: 210.1125, found: 210.1116.

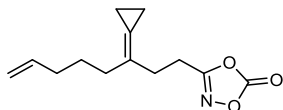

**1r**

Compound **1r** is a previously unknown compound and was synthesized in 19% yield following the **general procedure A**.

Light yellow oil. (*R<sub>f</sub>* = 0.70, PE/EA = 10:1, v/v)

**<sup>1</sup>H NMR** (400 MHz, Chloroform-*d*) δ 5.85 – 5.75 (m, 1H), 5.04 – 4.91 (m, 2H), 2.87 (t, *J* = 8.6 Hz, 2H), 2.55 (t, *J* = 8.0 Hz, 2H), 2.18 (t, *J* = 7.8 Hz, 2H), 2.03 (q, *J* = 7.1 Hz, 2H), 1.63 – 1.59 (m, 2H), 1.03 (s, 4H).

**<sup>13</sup>C NMR** (101 MHz, Chloroform-*d*) δ 166.81, 154.28, 138.64, 124.40, 117.79, 114.73, 34.57, 33.54, 29.70, 26.91, 23.35, 2.39, 1.81, 1.09.

**HRMS** (ESI) *m/z* Calcd for C<sub>13</sub>H<sub>18</sub>NO<sub>3</sub><sup>+</sup>[M+H]<sup>+</sup>: 236.1281, found: 236.1284.

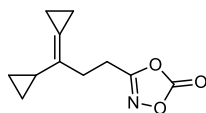

**1s**

Compound **1s** is a previously unknown compound and was synthesized in 23% yield following the **general procedure A**.

Light yellow oil. ( $R_f$  = 0.60, PE/EA = 10:1, v/v)

$^1\text{H NMR}$  (400 MHz, Chloroform-*d*)  $\delta$  2.91 (t,  $J$  = 7.6 Hz, 2H), 2.54 (t,  $J$  = 7.7 Hz, 2H), 1.41 – 1.34 (m, 1H), 1.06 (t,  $J$  = 7.6 Hz, 2H), 0.92 (t,  $J$  = 7.6 Hz, 2H), 0.69 – 0.52 (m, 4H).

$^{13}\text{C NMR}$  (101 MHz, Chloroform-*d*)  $\delta$  166.80, 154.33, 125.43, 115.93, 30.15, 23.74, 15.15, 5.22, 2.05, 0.57.

**HRMS** (ESI)  $m/z$  Calcd for  $\text{C}_{11}\text{H}_{14}\text{NO}_3^+[\text{M}+\text{H}]^+$ : 208.0968, found: 208.0965.

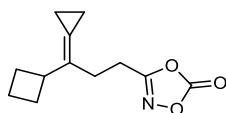

**1t**

Compound **1t** is a previously unknown compound and was synthesized in 23% yield following the **general procedure A**.

Light yellow oil. ( $R_f$  = 0.60, PE/EA = 10:1, v/v)

$^1\text{H NMR}$  (400 MHz, Chloroform-*d*)  $\delta$  3.10 – 3.01 (m, 1H), 2.83 (t,  $J$  = 8.0 Hz, 2H), 2.49 (t,  $J$  = 7.8 Hz, 2H), 2.12 – 2.02 (m, 4H), 1.94 – 1.83 (m, 1H), 1.78 – 1.69 (m, 1H), 1.15 – 1.09 (m, 2H), 0.99 – 0.90 (m, 2H).

$^{13}\text{C NMR}$  (101 MHz, Chloroform-*d*)  $\delta$  166.88, 154.34, 127.65, 116.00, 40.77, 28.39, 27.73, 23.50, 18.50, 2.22, 0.36.

**HRMS** (ESI)  $m/z$  Calcd for  $\text{C}_{12}\text{H}_{16}\text{NO}_3^+[\text{M}+\text{H}]^+$ : 222.1125, found: 222.1126.

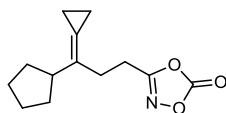

**1u**

Compound **1u** is a previously unknown compound and was synthesized in 29% yield following the **general procedure A**.

Light yellow oil. ( $R_f$  = 0.60, PE/EA = 10:1, v/v)

**<sup>1</sup>H NMR** (400 MHz, Chloroform-*d*)  $\delta$  2.89 (t,  $J = 7.8$  Hz, 2H), 2.55 (t,  $J = 7.8$  Hz, 3H), 1.86 – 1.78 (m, 2H), 1.70 – 1.63 (m, 2H), 1.62 – 1.46 (m, 4H), 1.11 – 1.03 (m, 2H), 1.01 – 0.93 (m, 2H).

**<sup>13</sup>C NMR** (101 MHz, Chloroform-*d*)  $\delta$  166.92, 154.32, 127.81, 115.81, 45.78, 31.26, 29.28, 25.13, 23.70, 2.50, 1.25.

**HRMS** (ESI)  $m/z$  Calcd for C<sub>13</sub>H<sub>18</sub>NO<sub>3</sub><sup>+</sup>[M+H]<sup>+</sup>: 236.1281, found: 236.1284.

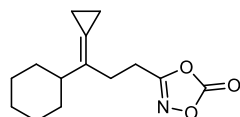

**1v**

Compound **1v** is a previously unknown compound and was synthesized in 18% yield following the **general procedure A**.

Light yellow oil. ( $R_f = 0.60$ , PE/EA = 10:1, v/v)

**<sup>1</sup>H NMR** (400 MHz, Chloroform-*d*)  $\delta$  2.87 (t,  $J = 7.7$  Hz, 2H), 2.54 (t,  $J = 7.7$  Hz, 2H), 2.09 – 2.00 (m, 1H), 1.79 – 1.70 (m, 4H), 1.70 – 1.64 (m, 1H), 1.36 – 1.19 (m, 5H), 1.08 (t,  $J = 8.0$  Hz, 2H), 0.96 (t,  $J = 7.6$  Hz, 2H).

**<sup>13</sup>C NMR** (101 MHz, Chloroform-*d*)  $\delta$  166.93, 154.35, 129.54, 115.96, 44.39, 31.89, 28.71, 26.79, 26.37, 23.79, 2.39, 1.14.

**HRMS** (ESI)  $m/z$  Calcd for C<sub>14</sub>H<sub>20</sub>NO<sub>3</sub><sup>+</sup>[M+H]<sup>+</sup>: 250.1438, found: 250.1428.

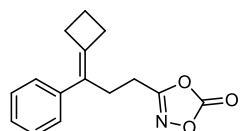

**1w**

Compound **1w** is a previously known compound and was synthesized in 20% yield following the **general procedure B**.

Yellow liquid. ( $R_f = 0.60$ , PE/EA = 10:1, v/v)

**<sup>1</sup>H NMR** (400 MHz, Chloroform-*d*)  $\delta$  7.23 (t,  $J = 8.6$  Hz, 2H), 7.14 – 7.10 (m, 3H), 2.74 – 2.63 (m, 6H), 2.50 (t,  $J = 7.4$  Hz, 1H), 1.90 (p,  $J = 7.8$  Hz, 2H).

**<sup>13</sup>C NMR** (101 MHz, Chloroform-*d*)  $\delta$  166.39, 154.18, 141.30, 138.04, 128.48, 127.47, 127.26, 126.73, 31.72, 30.53, 25.91, 23.96, 16.88.

**HRMS** (ESI)  $m/z$  Calcd for C<sub>15</sub>H<sub>16</sub>NO<sub>3</sub><sup>+</sup>[M+H]<sup>+</sup>: 258.1125, found: 258.1131.

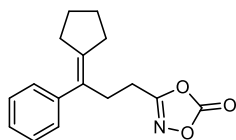

**1x**

Compound **1x** is a previously known compound and was synthesized in 18% yield following the **general procedure B**.

Yellow liquid. ( $R_f = 0.70$ , PE/EA = 10:1, v/v)

$^1\text{H NMR}$  (400 MHz, Chloroform-*d*) 7.20 (t,  $J = 7.5$  Hz, 2H), 7.10 (t,  $J = 7.4$  Hz, 1H), 7.04 (d,  $J = 6.9$  Hz, 2H), 2.68 (t,  $J = 7.5$  Hz, 2H), 2.45 (t,  $J = 7.5$  Hz, 2H), 2.27 (t,  $J = 7.4$  Hz, 2H), 2.05 (t,  $J = 7.2$  Hz, 2H), 1.63 (p,  $J = 7.0$  Hz, 2H), 1.47 (p,  $J = 7.0$  Hz, 2H).

$^{13}\text{C NMR}$  (101 MHz, Chloroform-*d*)  $\delta$  166.50, 154.14, 143.51, 141.62, 128.42, 128.38, 128.06, 126.67, 32.56, 30.73, 29.95, 26.81, 26.45, 23.65.

**HRMS** (ESI)  $m/z$  Calcd for  $\text{C}_{16}\text{H}_{18}\text{NO}_3^+[\text{M}+\text{H}]^+$ : 272.1281, found: 272.1279.

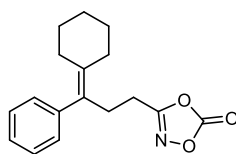

**1y**

Compound **1y** is a previously unknown compound and was synthesized in 22% yield following the **general procedure B**.

Yellow liquid. ( $R_f = 0.70$ , PE/EA = 10:1, v/v)

$^1\text{H NMR}$  (400 MHz, Chloroform-*d*) 7.25 (t,  $J = 8.2$  Hz, 2H), 7.19 – 7.13 (m, 1H), 7.03 – 6.97 (m, 2H), 2.71 (t,  $J = 7.4$  Hz, 2H), 2.46 (t,  $J = 7.4$  Hz, 2H), 2.20 (t,  $J = 5.5$  Hz, 2H), 1.93 – 1.84 (m, 2H), 1.52 – 1.47 (m, 4H), 1.40 – 1.33 (m, 2H).

$^{13}\text{C NMR}$  (101 MHz, Chloroform-*d*)  $\delta$  166.29, 154.12, 141.69, 139.50, 129.08, 128.37, 128.28, 126.65, 32.26, 30.55, 28.71, 28.50, 28.43, 26.69, 23.95.

**HRMS** (ESI)  $m/z$  Calcd for  $\text{C}_{17}\text{H}_{20}\text{NO}_3^+[\text{M}+\text{H}]^+$ : 286.1438, found: 286.1437.

### 3. Optimization of reaction conditions

#### 3.1 Screening of chiral catalysts

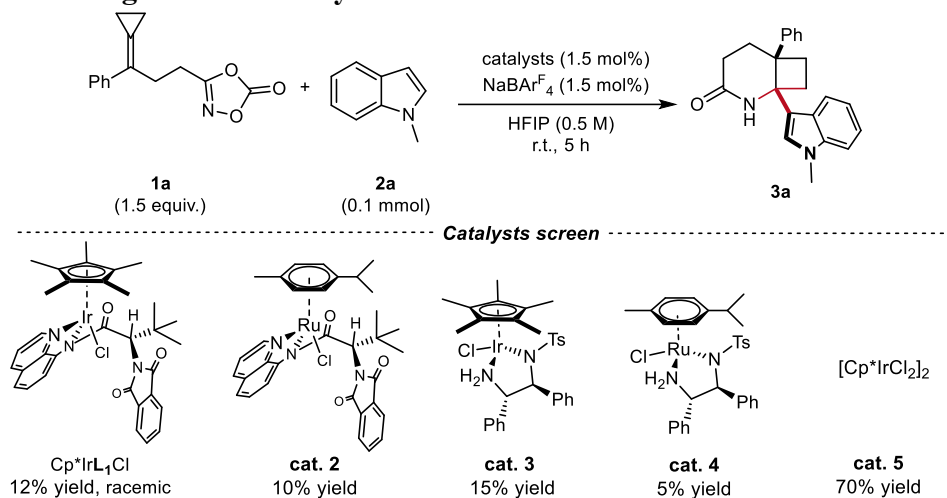

Supplementary Figure 2. Screening of chiral catalysts

Initially, the reaction between methylenecyclopropane-containing 1,4,2-dioxazolone **1a** and *N*-methylindole **2a** was examined in the presence of  $\text{Cp}^*\text{IrL}_1\text{Cl}$ . Under these conditions, the cyclobutane-fused  $\delta$ -lactam **3a** was obtained in 12% yield. Unfortunately, lactam **3a** was formed as a racemate. Subsequently, several alternative chiral catalysts were tested (**cat. 2**~**cat. 4**), which resulted in messy reaction systems and only low yields of the desired product. Notably, the use of the parent  $[\text{Cp}^*\text{IrCl}_2]_2$  as the catalyst led to a significant improvement, affording **3a** in 70% yield. Based on this observation, we proposed that the combination of  $[\text{Cp}^*\text{IrCl}_2]_2$  with a chiral ligand could potentially achieve the asymmetric synthesis of **3a**.

### 3.2 Screening of chiral ligands

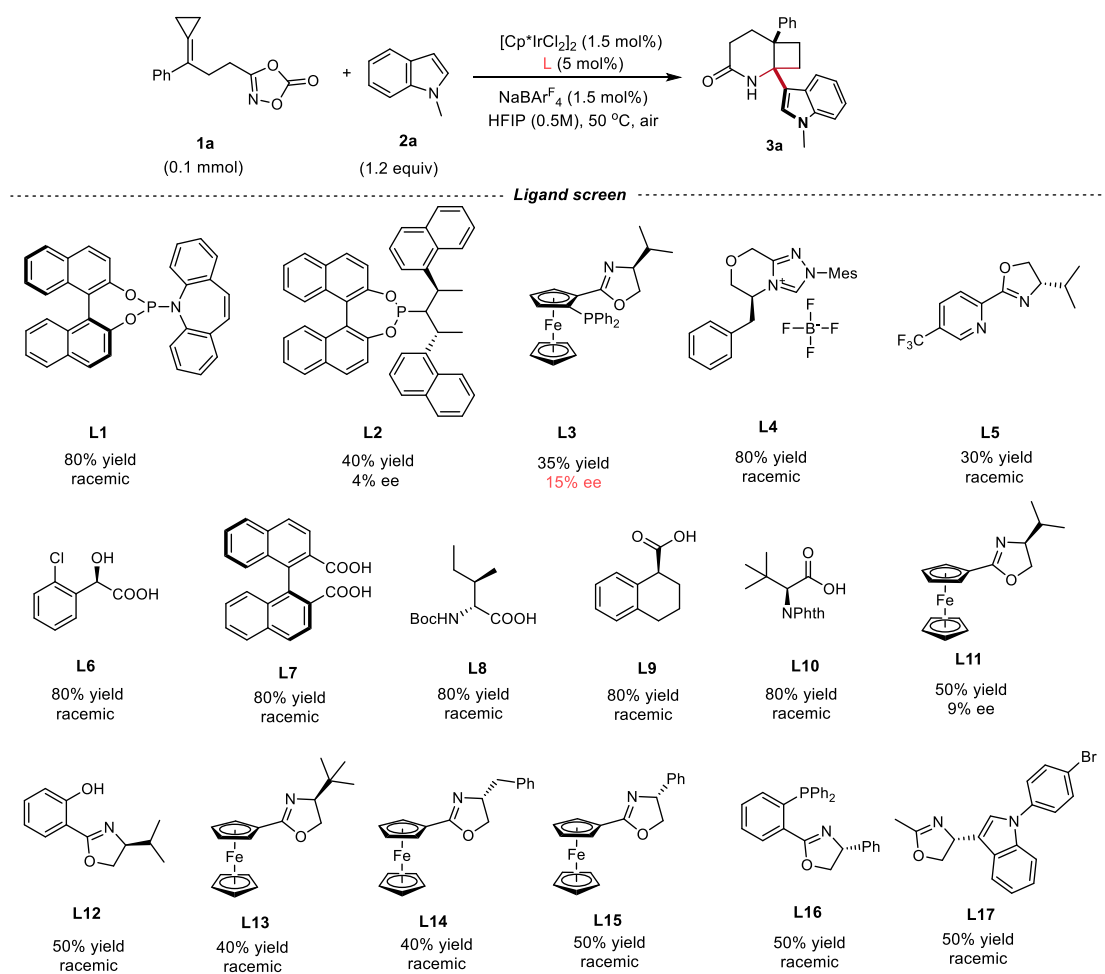

**Supplementary Figure 3.** Screening of chiral ligands

Using the parent  $[\text{Cp}^*\text{IrCl}_2]_2$  as the catalyst, we evaluated a range of chiral ligands. However, the introduction of chiral ligands led to complex reaction mixtures and a substantial reduction in product yield. Moreover, no enhancement in the enantiomeric excess of the product was achieved, with the product remaining essentially racemic. To date, an effective method for the asymmetric synthesis of **3a** has not been established.

### 3.3 Optimization of reaction conditions

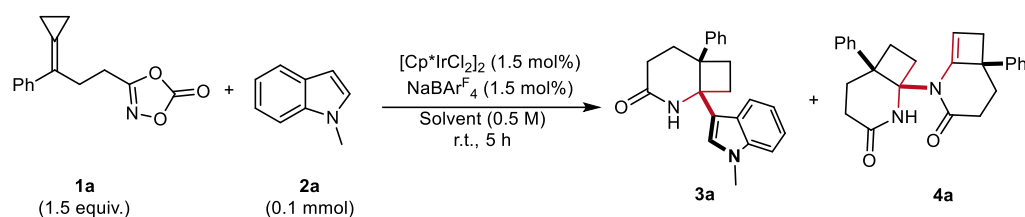

Supplementary Figure 4. Optimization of reaction conditions

| Entry | Catalyst                                                       | Solvent           | Temperature | 3a (%)          | 4a (%)           |
|-------|----------------------------------------------------------------|-------------------|-------------|-----------------|------------------|
| 1     | Cp*IrL1Cl                                                      | HFIP              | r.t.        | 12              | ND               |
| 2     | [Cp*IrCl <sub>2</sub> ] <sub>2</sub>                           | HFIP              | r.t.        | 70              | ND               |
| 3     | [Cp*IrCl <sub>2</sub> ] <sub>2</sub>                           | CHCl <sub>3</sub> | r.t.        | 41              | 20               |
| 4     | [Cp*IrCl <sub>2</sub> ] <sub>2</sub>                           | TCE               | r.t.        | 38 <sup>d</sup> | 20               |
| 5     | [Cp*IrCl <sub>2</sub> ] <sub>2</sub>                           | DCM               | r.t.        | 13              | 54               |
| 6     | [Cp*IrCl <sub>2</sub> ] <sub>2</sub>                           | TFE               | r.t.        | 76              | ND               |
| 7     | [Cp*IrCl <sub>2</sub> ] <sub>2</sub>                           | NFTB              | r.t.        | 89              | ND               |
| 8     | PcFe                                                           | NFTB              | r.t.        | 30              | Trace            |
| 9     | FeCl <sub>2</sub>                                              | NFTB              | r.t.        | ND              | Trace            |
| 10    | [Ru( <i>p</i> -cymene)Cl <sub>2</sub> ] <sub>2</sub>           | NFTB              | r.t.        | 22              | Trace            |
| 11    | CuOAc                                                          | NFTB              | r.t.        | 62              | ND               |
| 12    | [Cp*RhCl <sub>2</sub> ] <sub>2</sub>                           | NFTB              | r.t.        | ND              | ND               |
| 13    | w/o [Cp*IrCl <sub>2</sub> ] <sub>2</sub>                       | NFTB              | r.t.        | ND              | ND               |
| 14    | w/o NaBARF <sub>4</sub>                                        | NFTB              | r.t.        | 97 <sup>b</sup> | ND               |
| 15    | [Cp*IrCl <sub>2</sub> ] <sub>2</sub> (0.5 mol%)                | NFTB              | r.t.        | 96              | ND               |
| 16    | [Cp*IrCl <sub>2</sub> ] <sub>2</sub> , 20 min                  | NFTB              | r.t.        | 87              | ND               |
| 17    | [Cp*IrCl <sub>2</sub> ] <sub>2</sub>                           | NFTB              | 0 °C        | 60              | ND               |
| 18    | [Cp*IrCl <sub>2</sub> ] <sub>2</sub>                           | NFTB              | 50 °C       | 98              | ND               |
| 19    | [Cp*IrCl <sub>2</sub> ] <sub>2</sub>                           | NFTB              | r.t.        | ND              | 60 <sup>b</sup>  |
| 20    | ±[Cp*IrCl <sub>2</sub> ] <sub>2</sub> , using 4a<br>replace 1a | NFTB              | r.t.        | ND              | >95 <sup>c</sup> |

[a] Yields are based on <sup>1</sup>H NMR analysis of the reaction mixture on a 0.1 mmol scale using 1,1,2,2-tetrachloroethane as internal standard. [b] Isolated yield. [c] Isolated the recovered of 4a. [d] Using dibromomethane as internal standard. TCE, 1,1,2,2-tetrachloroethane; DCM, dichloromethane; TFE, trifluoroethanol; HFIP, hexafluoro-2-propanol; NFTB, nonafluoro-tert-butanol; ND, not detected.

Supplementary Table 1. Evaluation of different reaction conditions

**General experimental procedure:** All reactions were performed on a 0.1 mmol scale. To an oven-dried screwed 4 mL glass vial equipped with a rod-like-shaped Teflon stir

bar were added  $[\text{Cp}^*\text{IrCl}_2]_2$  catalyst (0.0015 mmol, 1.5 mol%),  $\text{NaBAR}^{\text{F}}_4$  (1.3 mg, 0.0015 mmol, 1.5 mol%), *N*-methyl-indole **2a**, solvent (200  $\mu\text{L}$ , 0.5 M), and dioxazolone substrate **1a** under air atmosphere. The vial was then sealed. The reaction mixture was slowly stirred (200 rpm) in a metal heating plate at 25 °C for 5 h. Water was added and the mixture was extracted with ethyl acetate (EA). The combined organic layer was washed with water and brine, dried over anhydrous  $\text{Na}_2\text{SO}_4$ , and concentrated in vacuo. The resulting residue was dissolved in 0.5 mL of  $\text{CDCl}_3$  along with 1,1,2,2-tetrachloroethane (16.8 mg, 0.1 mmol, 1.0 equiv., a singlet peak around 5.96 ppm) as internal standard.

## 4. General procedure for nitrene-triggered carbocationic rearrangement

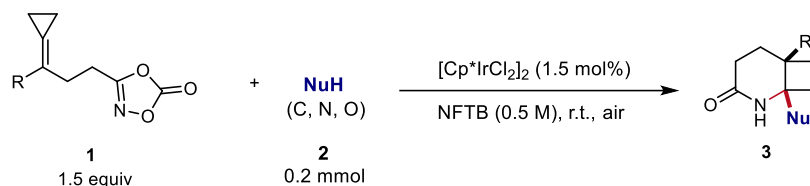

**Supplementary Figure 5.** General procedure for the reaction of **1** with **2**

**Condition [A]:** To an oven-dried screwed 4 mL glass vial equipped with a rod-like-shaped Teflon stir bar were added  $[\text{Cp}^*\text{IrCl}_2]_2$  catalyst (2.4 mg, 0.003 mmol, 1.5 mol%), **Nu-H 2** (0.2 mmol), NFTB (400  $\mu\text{L}$ , 0.5 M), and dioxazolone substrate **1** (0.3 mmol, 1.5 equiv.) under air atmosphere. The vial was then sealed. The reaction mixture was slowly stirred (200 rpm) in a metal heating plate at 25  $^\circ\text{C}$  for 5 h. Water was added and the mixture was extracted with EA. The combined organic layer was washed with water and brine, dried over anhydrous  $\text{Na}_2\text{SO}_4$ , and concentrated in vacuo. The resulting residue was purified by silica gel flash chromatography using PE/EA/MeOH eluent (3:1:0 to 2:1:0.2, v/v/v) to give the  $\delta$ -lactam product.

**Condition [B]:** To an oven-dried screwed 4 mL glass vial equipped with a rod-like-shaped Teflon stir bar were added  $[\text{Cp}^*\text{IrCl}_2]_2$  catalyst (3.6 mg, 0.0045 mmol, 1.5 mol%), NFTB (400  $\mu\text{L}$ , 0.5 M), and dioxazolone substrate **1** (0.3 mmol, 1.0 equiv.) under air atmosphere. The vial was then sealed. The reaction mixture was slowly stirred (200 rpm) in a metal heating plate at 25  $^\circ\text{C}$  for 5 h. Water was added and the mixture was extracted with EA. The combined organic layer was washed with water and brine, dried over anhydrous  $\text{Na}_2\text{SO}_4$ , and concentrated in vacuo. The resulting residue was purified by silica gel flash chromatography using PE/EA/MeOH eluent (3:1:0 to 2:1:0.2, v/v/v) to give the  $\delta$ -lactam product.

#### 4.1 Nitrene-triggered carbocationic rearrangement of tetrasubstituted alkenes: the substrate scope of dioxazolones.

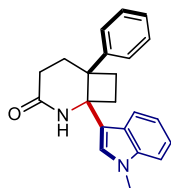

**3a**

White solid. ( $R_f$  = 0.30, DCM/MeOH = 50:1, v/v)

Compound **3a** is a previously unknown compound and was synthesized in 97% yield, dr >20:1 (66.1 mg, 0.2 mmol scale) following the **Condition [A]**.

$^1\text{H NMR}$  (400 MHz, Chloroform-*d*)  $\delta$  7.70 (d,  $J$  = 8.0 Hz, 1H), 7.19 – 7.13 (m, 2H), 7.11 – 7.04 (m, 3H), 7.02 – 6.92 (m, 3H), 6.61 (s, 1H), 6.51 (s, 1H), 3.54 (s, 3H), 2.77 – 2.60 (m, 4H), 2.59 – 2.49 (m, 1H), 2.41 – 2.31 (m, 2H), 2.28 – 2.21 (m, 1H).

$^{13}\text{C NMR}$  (101 MHz, Chloroform-*d*)  $\delta$  172.92, 144.78, 137.16, 127.43, 127.01, 126.45, 126.31, 125.90, 121.63, 120.56, 119.55, 116.21, 109.45, 62.56, 50.38, 35.52, 34.89, 32.71, 28.99, 25.64.

**HRMS** (ESI)  $m/z$  Calcd for  $\text{C}_{22}\text{H}_{23}\text{N}_2\text{O}^+[\text{M}+\text{H}]^+$ : 331.1805, found: 331.1812.

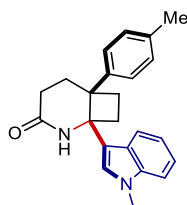

**3b**

White solid. ( $R_f$  = 0.30, DCM/MeOH = 50:1, v/v)

Compound **3b** is a previously unknown compound and was synthesized in 84% yield, dr >20:1 (57.8 mg, 0.2 mmol scale) following the **Condition [A]**.

$^1\text{H NMR}$  (400 MHz, Chloroform-*d*)  $\delta$  7.71 (d,  $J$  = 8.0 Hz, 1H), 7.16 (d,  $J$  = 4.2 Hz, 2H), 7.11 – 7.07 (m, 1H), 6.95 (d,  $J$  = 8.2 Hz, 2H), 6.80 (d,  $J$  = 7.9 Hz, 2H), 6.63 (s, 1H), 6.53 (d,  $J$  = 7.0 Hz, 1H), 3.54 (s, 3H), 2.75 – 2.62 (m, 3H), 2.62 – 2.49 (m, 2H), 2.40 – 2.35 (m, 1H), 2.34 – 2.29 (m, 1H), 2.25 – 2.17 (m, 1H), 2.13 (s, 3H).

$^{13}\text{C NMR}$  (101 MHz, Chloroform-*d*)  $\delta$  172.91, 141.81, 137.12, 135.27, 128.15, 127.04,

126.36, 126.28, 121.55, 120.57, 119.51, 116.21, 109.42, 62.48, 49.99, 35.47, 34.99, 32.69, 28.86, 25.71, 20.78.

**HRMS** (ESI)  $m/z$  Calcd for  $C_{23}H_{25}N_2O^+[M+H]^+$ : 345.1961, found: 345.1968.

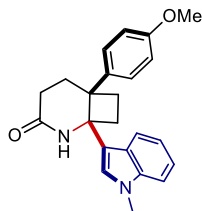

**3c**

White solid. ( $R_f$  = 0.30, DCM/MeOH = 50:1, v/v)

Compound **3c** is a previously unknown compound and was synthesized in 84% yield, dr >20:1 (60.5 mg, 0.2 mmol scale) following the **Condition [A]**.

**$^1H$  NMR** (400 MHz, Chloroform-*d*)  $\delta$  7.67 (d,  $J$  = 8.0 Hz, 1H), 7.15 (s, 2H), 7.09 – 7.05 (m, 1H), 6.97 (d,  $J$  = 7.9 Hz, 2H), 6.61 (s, 1H), 6.51 (d,  $J$  = 8.8 Hz, 2H), 6.48 (s, 1H), 3.61 (s, 3H), 3.56 (s, 3H), 2.74 – 2.65 (m, 3H), 2.61 – 2.46 (m, 2H), 2.37 – 2.19 (m, 3H).

**$^{13}C$  NMR** (101 MHz, Chloroform-*d*)  $\delta$  172.90, 157.57, 137.23, 136.85, 127.52, 127.10, 126.34, 121.64, 120.57, 119.57, 116.29, 112.84, 109.48, 62.63, 55.07, 49.80, 35.27, 34.76, 32.75, 29.07, 25.53.

**HRMS** (ESI)  $m/z$  Calcd for  $C_{23}H_{25}N_2O_2^+[M+H]^+$ : 361.1911, found: 361.1913.

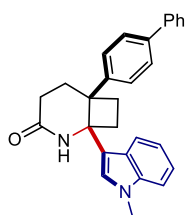

**3d**

White solid. ( $R_f$  = 0.20, DCM/MeOH = 50:1, v/v)

Compound **3d** is a previously unknown compound and was synthesized in 98% yield, dr >20:1 (80.1 mg, 0.2 mmol scale) following the **Condition [A]**.

**$^1H$  NMR** (400 MHz, Chloroform-*d*)  $\delta$  7.71 (d,  $J$  = 7.9 Hz, 1H), 7.37 – 7.34 (m, 2H), 7.30 (t,  $J$  = 7.5 Hz, 2H), 7.23 (d,  $J$  = 7.2 Hz, 1H), 7.17 (d,  $J$  = 8.4 Hz, 2H), 7.15 – 7.05 (m, 5H), 6.64 (s, 1H), 6.52 (s, 1H), 3.49 (s, 3H), 2.76 – 2.59 (m, 4H), 2.56 – 2.49 (m,

1H), 2.40 – 2.31 (m, 2H), 2.28 – 2.21 (m, 1H).

<sup>13</sup>C NMR (101 MHz, Chloroform-*d*) δ 172.88, 143.93, 140.48, 138.46, 137.18, 128.64, 127.07, 126.89, 126.76, 126.37, 126.05, 121.68, 120.58, 119.65, 116.11, 109.54, 62.66, 50.30, 35.50, 34.81, 32.71, 28.98, 25.65.

HRMS (ESI) *m/z* Calcd for C<sub>28</sub>H<sub>27</sub>N<sub>2</sub>O<sup>+</sup>[M+H]<sup>+</sup>: 407.2118, found: 407.2121.

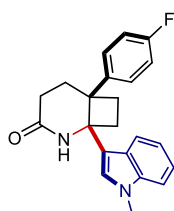

**3e**

Yellow solid. (*R<sub>f</sub>* = 0.40, DCM/MeOH = 50:1, v/v)

Compound **3e** is a previously unknown compound and was synthesized in 92% yield, dr >20:1 (64.0 mg, 0.2 mmol scale) following the **Condition [A]**.

<sup>1</sup>H NMR (400 MHz, Chloroform-*d*) δ 7.65 (d, *J* = 8.1 Hz, 1H), 7.15 (d, *J* = 3.1 Hz, 2H), 7.08 – 7.04 (m, 1H), 7.01 – 6.98 (m, 2H), 6.67 (s, 1H), 6.61 (dd, *J* = 18.2, 9.6 Hz, 3H), 3.57 (s, 3H), 2.76 – 2.70 (m, 1H), 2.68 – 2.62 (m, 2H), 2.60 – 2.47 (m, 2H), 2.39 – 2.26 (m, 2H), 2.23 – 2.17 (m, 1H).

<sup>13</sup>C NMR (101 MHz, Chloroform-*d*) δ 172.92, 160.92 (d, *J* = 243.7 Hz), 140.46, 137.23, 127.9 (d, *J* = 7.7 Hz), 127.02, 126.18, 121.73, 120.47, 119.64, 116.01, 114.16 (d, *J* = 20.8 Hz), 109.54, 62.56, 50.02, 35.19, 34.70, 32.76, 29.00, 25.59.

<sup>19</sup>F NMR (376 MHz, Chloroform-*d*) δ -117.09.

HRMS (ESI) *m/z* Calcd for C<sub>22</sub>H<sub>22</sub>FN<sub>2</sub>O<sup>+</sup>[M+H]<sup>+</sup>: 349.1711, found: 349.1718.

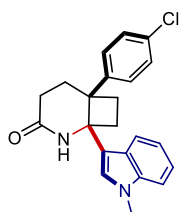

**3f**

White solid. (*R<sub>f</sub>* = 0.30, DCM/MeOH = 50:1, v/v)

Compound **3f** is a previously unknown compound and was synthesized in 80% yield, dr >20:1 (58.2 mg, 0.2 mmol scale) following the **Condition [A]**.

**<sup>1</sup>H NMR** (400 MHz, Chloroform-*d*)  $\delta$  7.67 (d,  $J$  = 8.1 Hz, 1H), 7.17 (s, 2H), 7.10 – 7.06 (m, 1H), 6.97 (d,  $J$  = 8.0 Hz, 2H), 6.91 (d,  $J$  = 8.5 Hz, 2H), 6.68 (s, 1H), 6.48 (s, 1H), 3.60 (s, 3H), 2.75 – 2.63 (m, 3H), 2.60 – 2.48 (m, 2H), 2.39 – 2.27 (m, 2H), 2.21 – 2.15 (m, 1H).

**<sup>13</sup>C NMR** (101 MHz, Chloroform-*d*)  $\delta$  172.83, 143.44, 137.30, 131.67, 127.89, 127.60, 127.02, 126.23, 121.86, 120.50, 119.80, 115.99, 109.67, 62.60, 50.29, 35.42, 34.87, 32.86, 28.99, 25.67.

**HRMS** (ESI)  $m/z$  Calcd for C<sub>22</sub>H<sub>22</sub>ClN<sub>2</sub>O<sup>+</sup>[M+H]<sup>+</sup>: 365.1415, found: 365.1414.

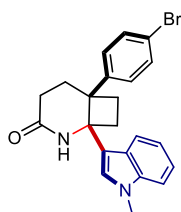

**3g**

White solid. ( $R_f$  = 0.30, DCM/MeOH = 50:1, v/v)

Compound **3g** is a previously unknown compound and was synthesized in 86% yield, dr >20:1 (70.4 mg, 0.2 mmol scale) following the **Condition [A]**.

**<sup>1</sup>H NMR** (400 MHz, Chloroform-*d*)  $\delta$  7.67 (d,  $J$  = 8.1 Hz, 1H), 7.19 – 7.14 (m, 2H), 7.10 – 7.05 (m, 3H), 6.90 (d,  $J$  = 8.3 Hz, 2H), 6.69 (s, 1H), 6.53 (s, 1H), 3.59 (s, 3H), 2.74 – 2.69 (m, 1H), 2.64 (t,  $J$  = 6.6 Hz, 2H), 2.59 – 2.48 (m, 2H), 2.39 – 2.28 (m, 2H), 2.20 – 2.13 (m, 1H).

**<sup>13</sup>C NMR** (101 MHz, Chloroform-*d*)  $\delta$  172.81, 143.98, 137.24, 130.52, 128.24, 127.00, 126.21, 121.81, 120.46, 119.81, 119.78, 115.88, 109.67, 62.49, 50.29, 35.42, 34.84, 32.85, 28.88, 25.67.

**HRMS** (ESI)  $m/z$  Calcd for C<sub>22</sub>H<sub>22</sub>BrN<sub>2</sub>O<sup>+</sup>[M+H]<sup>+</sup>: 409.0910, found: 409.0914.

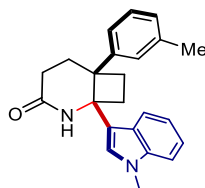

**3h**

Light Yellow solid. ( $R_f$  = 0.30, DCM/MeOH = 50:1, v/v)

Compound **3h** is a previously unknown compound and was synthesized in 82% yield, dr >20:1 (56.6 mg, 0.2 mmol scale) following the **Condition [A]**.

**<sup>1</sup>H NMR** (400 MHz, Chloroform-*d*)  $\delta$  7.75 (d,  $J = 8.0$  Hz, 1H), 7.17 – 7.08 (m, 3H), 6.91 – 6.85 (m, 3H), 6.75 (d,  $J = 7.0$  Hz, 1H), 6.64 (s, 1H), 6.55 (s, 1H), 3.54 (s, 3H), 2.73 – 2.53 (m, 5H), 2.40 – 2.31 (m, 2H), 2.25 – 2.18 (m, 1H), 1.99 (s, 3H).

**<sup>13</sup>C NMR** (101 MHz, Chloroform-*d*)  $\delta$  173.02, 144.81, 137.10, 136.80, 127.43, 127.27, 126.95, 126.53, 126.49, 123.27, 121.58, 120.71, 119.48, 116.16, 109.39, 62.46, 50.37, 35.68, 35.11, 32.69, 28.92, 25.85, 21.11.

**HRMS** (ESI)  $m/z$  Calcd for C<sub>23</sub>H<sub>25</sub>N<sub>2</sub>O<sup>+</sup>[M+H]<sup>+</sup>: 345.1961, found: 345.1968.

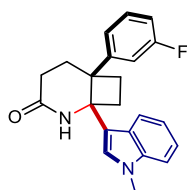

**3i**

White solid. ( $R_f = 0.30$ , DCM/MeOH = 50:1, v/v)

Compound **3i** is a previously unknown compound and was synthesized in 92% yield, dr >20:1 (64.1 mg, 0.2 mmol scale) following the **Condition [A]**.

**<sup>1</sup>H NMR** (400 MHz, Chloroform-*d*)  $\delta$  7.66 (d,  $J = 8.1$  Hz, 1H), 7.14 (d,  $J = 4.0$  Hz, 2H), 7.09 – 7.03 (m, 1H), 6.90 – 6.74 (m, 3H), 6.69 (s, 1H), 6.60 (t,  $J = 8.0$  Hz, 1H), 6.52 (s, 1H), 3.56 (s, 3H), 2.79 – 2.72 (m, 1H), 2.69 – 2.65 (m, 2H), 2.62 – 2.48 (m, 2H), 2.38 – 2.27 (m, 2H), 2.26 – 2.19 (m, 1H).

**<sup>13</sup>C NMR** (101 MHz, Chloroform-*d*)  $\delta$  172.78, 162.18 (d,  $J = 243.8$  Hz), 147.49 (d,  $J = 6.6$  Hz), 137.26, 128.70 (d,  $J = 8.4$  Hz), 126.97, 126.16, 122.23 (d,  $J = 2.5$  Hz), 121.76, 120.47, 119.64, 115.89, 113.53 (d,  $J = 22.0$  Hz), 112.71 (d,  $J = 20.9$  Hz), 109.50, 62.56, 50.44, 35.25, 34.56, 32.72, 29.02, 25.63.

**<sup>19</sup>F NMR** (376 MHz, Chloroform-*d*)  $\delta$  -113.80.

**HRMS** (ESI)  $m/z$  Calcd for C<sub>22</sub>H<sub>22</sub>FN<sub>2</sub>O<sup>+</sup>[M+H]<sup>+</sup>: 349.1711, found: 349.1705.

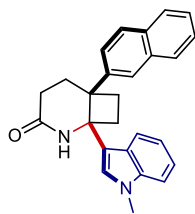

### 3j

White solid. ( $R_f$  = 0.30, DCM/MeOH = 50:1, v/v)

Compound **3j** is a previously unknown compound and was synthesized in 89% yield, dr >20:1 (67.6 mg, 0.2 mmol scale) following the **Condition [A]**.

$^1\text{H NMR}$  (400 MHz, Chloroform-*d*)  $\delta$  7.87 (d,  $J$  = 7.3 Hz, 1H), 7.59 (s, 2H), 7.51 (d,  $J$  = 7.4 Hz, 1H), 7.42 (d,  $J$  = 8.6 Hz, 1H), 7.35 – 7.31 (m, 2H), 7.13 (dd,  $J$  = 20.3, 7.3 Hz, 4H), 6.63 (d,  $J$  = 22.5 Hz, 2H), 3.43 (s, 3H), 2.81 – 2.58 (m, 5H), 2.49 – 2.39 (m, 2H), 2.34 – 2.27 (m, 1H).

$^{13}\text{C NMR}$  (101 MHz, Chloroform-*d*)  $\delta$  172.96, 142.56, 137.13, 132.72, 131.70, 127.67, 127.23, 126.99, 126.95, 126.52, 125.71, 125.36, 125.31, 124.75, 121.69, 120.68, 119.68, 116.11, 109.55, 62.54, 50.81, 35.82, 35.26, 32.63, 29.00, 25.92.

**HRMS** (ESI)  $m/z$  Calcd for  $\text{C}_{26}\text{H}_{25}\text{N}_2\text{O}^+[\text{M}+\text{H}]^+$ : 381.1961, found: 381.1969.

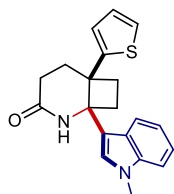

### 3k

White solid. ( $R_f$  = 0.30, DCM/MeOH = 50:1, v/v)

Compound **3k** is a previously unknown compound and was synthesized in 50% yield, dr >20:1 (33.6 mg, 0.2 mmol scale) following the **Condition [A]**.

$^1\text{H NMR}$  (400 MHz, Chloroform-*d*)  $\delta$  7.48 (d,  $J$  = 8.0 Hz, 1H), 7.19 – 7.12 (m, 2H), 6.98 (t,  $J$  = 6.7 Hz, 1H), 6.84 (dd,  $J$  = 4.8, 1.4 Hz, 1H), 6.76 (s, 1H), 6.64 – 6.53 (m, 2H), 6.24 (s, 1H), 3.67 (s, 3H), 2.97 – 2.88 (m, 1H), 2.85 – 2.76 (m, 2H), 2.59 – 2.43 (m, 3H), 2.41 – 2.36 (m, 1H), 2.32 – 2.26 (m, 1H).

$^{13}\text{C NMR}$  (101 MHz, Chloroform-*d*)  $\delta$  172.48, 148.85, 137.63, 127.74, 126.27, 125.96, 124.30, 123.66, 121.82, 120.88, 119.40, 115.38, 109.31, 63.77, 48.33, 33.56, 32.89,

32.70, 29.71, 27.60.

**HRMS** (ESI)  $m/z$  Calcd for  $C_{20}H_{21}N_2OS^+[M+H]^+$ : 337.1369, found: 337.1370.

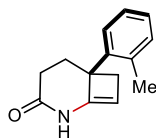

### 3l

White solid. ( $R_f$  = 0.30, DCM/MeOH = 50:1, v/v)

Compound **3l** is a previously unknown compound and was synthesized in 98% yield (41.7 mg, 0.2 mmol scale) following the **Condition [A]**.

**$^1H$  NMR** (400 MHz, Chloroform-*d*)  $\delta$  9.10 (s, 1H), 7.29 (d,  $J$  = 7.4 Hz, 1H), 7.17 (d,  $J$  = 3.7 Hz, 2H), 7.13 – 7.10 (m, 1H), 4.99 (s, 1H), 2.75 (dd,  $J$  = 11.5, 1.4 Hz, 1H), 2.47 (d,  $J$  = 11.5 Hz, 1H), 2.42 (d,  $J$  = 13.7 Hz, 1H), 2.32 (s, 3H), 2.30 (d,  $J$  = 3.6 Hz, 1H), 2.18 (dd,  $J$  = 13.2, 4.5 Hz, 1H), 2.12 (d,  $J$  = 8.1 Hz, 1H).

**$^{13}C$  NMR** (101 MHz, Chloroform-*d*)  $\delta$  172.13, 141.16, 140.84, 135.51, 131.26, 126.94, 126.85, 125.64, 101.77, 48.79, 40.62, 30.61, 30.29, 19.41.

**HRMS** (ESI)  $m/z$  Calcd for  $C_{14}H_{16}NO^+[M+H]^+$ : 214.1226, found: 214.1230.

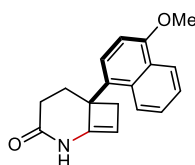

### 3m

Gray solid. ( $R_f$  = 0.20, DCM/MeOH = 50:1, v/v)

Compound **3m** is a previously unknown compound and was synthesized in 97% yield (54.1 mg, 0.2 mmol scale) following the **Condition [A]**.

**$^1H$  NMR** (400 MHz, Chloroform-*d*)  $\delta$  8.56 (s, 1H), 8.34 (d,  $J$  = 7.3 Hz, 1H), 7.85 (d,  $J$  = 8.5 Hz, 1H), 7.55 – 7.47 (m, 2H), 7.38 (d,  $J$  = 7.9 Hz, 1H), 6.70 (d,  $J$  = 7.9 Hz, 1H), 5.05 (s, 1H), 3.98 (s, 3H), 2.94 (d,  $J$  = 11.5 Hz, 1H), 2.64 – 2.59 (m, 2H), 2.45 – 2.39 (m, 1H), 2.32 – 2.12 (m, 2H).

**$^{13}C$  NMR** (101 MHz, Chloroform-*d*)  $\delta$  171.75, 154.91, 141.45, 131.49, 130.57, 126.54, 126.31, 124.99, 124.34, 124.18, 123.18, 102.82, 102.33, 55.63, 48.32, 41.30, 31.52, 30.71.

**HRMS** (ESI)  $m/z$  Calcd for  $C_{18}H_{18}NO_2^+[M+H]^+$ : 280.1332, found: 280.1338.

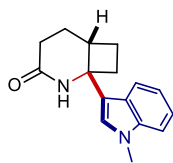

**3n**

Light yellow oil. ( $R_f$  = 0.40, DCM/MeOH = 50:1, v/v)

Compound **3n** is a previously unknown compound and was synthesized in 42% yield, dr >20:1 (21.4 mg, 0.2 mmol scale) following the condition. *Note: the conditions are the same as **Condition [A]**, except that the reaction time is extended to 17 hours.*

**$^1H$  NMR** (400 MHz, Chloroform-*d*)  $\delta$  7.60 (d,  $J$  = 8.0 Hz, 1H), 7.32 (d,  $J$  = 8.2 Hz, 1H), 7.26 (t,  $J$  = 8.0 Hz, 1H), 7.12 (t,  $J$  = 6.9 Hz, 1H), 7.01 (s, 1H), 6.12 (s, 1H), 3.77 (s, 3H), 3.05 – 2.98 (m, 1H), 2.89 – 2.82 (m, 1H), 2.65 – 2.57 (m, 1H), 2.52 (dt,  $J$  = 11.3, 5.2 Hz, 1H), 2.40 – 2.33 (m, 1H), 2.18 – 2.06 (m, 2H), 1.95 – 1.83 (m, 2H).

**$^{13}C$  NMR** (101 MHz, Chloroform-*d*)  $\delta$  172.89, 138.02, 125.98, 125.31, 122.22, 119.91, 119.50, 118.84, 109.79, 57.33, 38.88, 34.87, 32.91, 28.82, 24.14, 19.31.

**HRMS** (ESI)  $m/z$  Calcd for  $C_{16}H_{19}N_2O^+[M+H]^+$ : 255.1492, found: 255.1498.

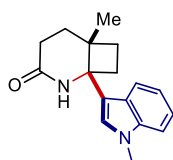

**3o**

White solid. ( $R_f$  = 0.30, DCM/MeOH = 50:1, v/v)

Compound **3o** is a previously unknown compound and was synthesized in 83% yield, dr >20:1 (44.5 mg, 0.2 mmol scale) following the **Condition [A]**.

**$^1H$  NMR** (400 MHz, Chloroform-*d*)  $\delta$  7.54 (d,  $J$  = 8.0 Hz, 1H), 7.29 (d,  $J$  = 8.2 Hz, 1H), 7.22 (t,  $J$  = 7.6 Hz, 1H), 7.06 (t,  $J$  = 7.5 Hz, 1H), 6.99 (s, 1H), 6.01 (s, 1H), 3.77 (s, 3H), 2.81 – 2.74 (m, 1H), 2.67 – 2.60 (m, 2H), 2.24 – 2.17 (m, 1H), 2.09 – 2.02 (m, 1H), 1.92 (dd,  $J$  = 7.2, 5.0 Hz, 2H), 1.69 – 1.62 (m, 1H), 0.84 (s, 3H).

**$^{13}C$  NMR** (101 MHz, Chloroform-*d*)  $\delta$  172.68, 137.90, 127.31, 126.47, 122.02, 120.83, 119.55, 115.97, 109.51, 61.15, 41.19, 32.93, 31.89, 31.75, 29.24, 25.57, 25.02.

**HRMS** (ESI)  $m/z$  Calcd for  $C_{17}H_{21}N_2O^+[M+H]^+$ : 269.1648, found: 269.1650.

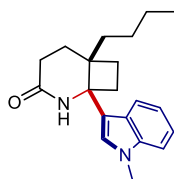

### 3p

Light yellow oil. ( $R_f$  = 0.40, DCM/MeOH = 50:1, v/v)

Compound **3p** is a previously unknown compound and was synthesized in 96% yield, dr >20:1 (59.5 mg, 0.2 mmol scale) following the **Condition [A]**.

$^1\text{H NMR}$  (400 MHz, Chloroform-*d*)  $\delta$  7.52 (d,  $J$  = 8.0 Hz, 1H), 7.27 (d,  $J$  = 8.2 Hz, 1H), 7.20 (t,  $J$  = 7.6 Hz, 1H), 7.04 (t,  $J$  = 7.5 Hz, 1H), 6.97 (s, 1H), 6.03 (s, 1H), 3.75 (s, 3H), 2.78 – 2.71 (m, 1H), 2.62 – 2.58 (m, 2H), 2.23 – 2.16 (m, 1H), 2.01 – 1.81 (m, 2H), 1.89 – 1.81 (m, 1H), 1.75 – 1.68 (m, 1H), 1.14 – 0.99 (m, 6H), 0.70 (t,  $J$  = 8.0 Hz, 3H).

$^{13}\text{C NMR}$  (101 MHz, Chloroform-*d*)  $\delta$  172.67, 137.83, 127.36, 126.69, 121.85, 120.88, 119.43, 115.52, 109.38, 61.47, 44.40, 36.44, 32.83, 32.28, 29.00, 28.36, 25.96, 23.45, 23.16, 14.11.

**HRMS** (ESI)  $m/z$  Calcd for  $\text{C}_{20}\text{H}_{27}\text{N}_2\text{O}^+[\text{M}+\text{H}]^+$ : 311.2118, found: 311.2119.

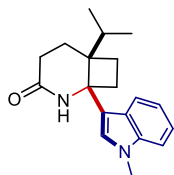

### 3q

White solid. ( $R_f$  = 0.40, DCM/MeOH = 50:1, v/v)

Compound **3q** is a previously unknown compound and was synthesized in 89% yield, dr >20:1 (52.7 mg, 0.2 mmol scale) following the **Condition [A]**.

$^1\text{H NMR}$  (400 MHz, Chloroform-*d*)  $\delta$  7.71 (d,  $J$  = 8.1 Hz, 1H), 7.29 (d,  $J$  = 8.2 Hz, 1H), 7.21 (t,  $J$  = 7.6 Hz, 1H), 7.08 (t,  $J$  = 8.0 Hz, 1H), 6.99 (s, 1H), 6.27 (s, 1H), 3.77 (s, 3H), 2.79 – 2.72 (m, 1H), 2.67 – 2.60 (m, 2H), 2.22 – 2.16 (m, 1H), 2.00 – 1.91 (m, 2H), 1.89 – 1.85 (m, 1H), 1.78 – 1.65 (m, 2H), 0.71 (d,  $J$  = 6.9 Hz, 3H), 0.38 (d,  $J$  = 6.6 Hz, 3H).

$^{13}\text{C NMR}$  (101 MHz, Chloroform-*d*)  $\delta$  173.63, 137.58, 127.65, 126.57, 121.86, 121.16, 119.62, 115.94, 109.60, 61.78, 48.84, 34.48, 33.25, 32.95, 29.75, 25.19, 23.19, 17.82,

17.28.

**HRMS** (ESI)  $m/z$  Calcd for  $C_{19}H_{25}N_2O^+[M+H]^+$ : 297.1961, found: 297.1970.

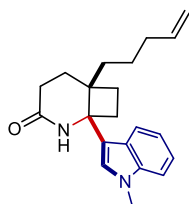

**3r**

Light yellow oil. ( $R_f$  = 0.40, DCM/MeOH = 50:1, v/v)

Compound **3r** is a previously unknown compound and was synthesized in 99% yield, dr >20:1 (63.8 mg, 0.2 mmol scale) following the **Condition [A]**.

**$^1H$  NMR** (400 MHz, Chloroform-*d*)  $\delta$  7.52 (d,  $J$  = 8.0 Hz, 1H), 7.27 (d,  $J$  = 8.0 Hz, 1H), 7.20 (t,  $J$  = 7.6 Hz, 1H), 7.05 (t,  $J$  = 7.5 Hz, 1H), 6.97 (s, 1H), 6.04 (s, 1H), 5.65 – 5.55 (m, 1H), 4.80 (d,  $J$  = 12.0 Hz, 2H), 3.75 (s, 3H), 2.78 – 2.71 (m, 1H), 2.61 (t,  $J$  = 8.0 Hz, 2H), 2.24 – 2.16 (m, 1H), 2.02 – 1.82 (m, 3H), 1.77 – 1.68 (m, 3H), 1.19 – 1.07 (m, 4H).

**$^{13}C$  NMR** (101 MHz, Chloroform-*d*)  $\delta$  172.60, 138.58, 137.83, 127.37, 126.66, 121.90, 120.86, 119.47, 115.42, 114.22, 109.40, 61.43, 44.38, 36.29, 34.06, 32.84, 32.30, 28.99, 28.37, 23.46, 23.19.

**HRMS** (ESI)  $m/z$  Calcd for  $C_{21}H_{27}N_2O^+[M+H]^+$ : 323.2118, found: 323.2120.

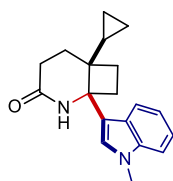

**3s**

Light yellow solid. ( $R_f$  = 0.40, DCM/MeOH = 50:1, v/v)

Compound **3s** is a previously unknown compound and was synthesized in 99% yield, dr >20:1 (57.6 mg, 0.2 mmol scale) following the **Condition [A]**.

**$^1H$  NMR** (400 MHz, Chloroform-*d*)  $\delta$  7.56 (d,  $J$  = 8.0 Hz, 1H), 7.24 (s, 1H), 7.16 (t,  $J$  = 7.6 Hz, 1H), 7.03 (t,  $J$  = 7.5 Hz, 1H), 6.94 (s, 1H), 6.06 (s, 1H), 3.74 (s, 3H), 2.67 – 2.60 (m, 3H), 2.16 – 2.09 (m, 1H), 2.00 – 1.93 (m, 1H), 1.89 – 1.82 (m, 1H), 1.72 – 1.65 (m, 1H), 1.27 – 1.21 (m, 1H), 0.47 – 0.40 (m, 1H), 0.10 – 0.05 (m, 2H), -0.11 – -

0.16 (m, 2H).

$^{13}\text{C}$  NMR (101 MHz, Chloroform-*d*)  $\delta$  172.46, 137.83, 127.38, 126.83, 121.76, 120.81, 119.30, 115.76, 109.32, 61.46, 44.58, 32.82, 32.07, 30.54, 29.01, 18.28, 16.20, 2.19, - 0.36.

**HRMS** (ESI)  $m/z$  Calcd for  $\text{C}_{19}\text{H}_{23}\text{N}_2\text{O}^+[\text{M}+\text{H}]^+$ : 295.1805, found: 295.1809.

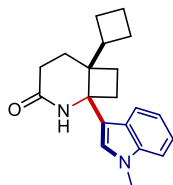

**3t**

Light yellow solid. ( $R_f$  = 0.30, DCM/MeOH = 50:1, v/v)

Compound **3t** is a previously unknown compound and was synthesized in 97% yield, dr >20:1 (59.8 mg, 0.2 mmol scale) following the **Condition [A]**.

$^1\text{H}$  NMR (400 MHz, Chloroform-*d*)  $\delta$  7.53 (d,  $J$  = 8.0 Hz, 1H), 7.27 (d,  $J$  = 4.0 Hz, 1H), 7.21 (t,  $J$  = 7.6 Hz, 1H), 7.06 (t,  $J$  = 7.5 Hz, 1H), 6.89 (s, 1H), 5.97 (s, 1H), 3.74 (s, 3H), 2.73 – 2.67 (m, 1H), 2.63 (t,  $J$  = 6.7 Hz, 2H), 2.28 – 2.22 (m, 1H), 2.20 – 2.13 (m, 1H), 2.04 – 1.97 (m, 1H), 1.92 – 1.85 (m, 1H), 1.81 (t,  $J$  = 6.7 Hz, 2H), 1.72 – 1.63 (m, 1H), 1.47 – 1.40 (m, 4H), 0.90 – 0.82 (m, 1H).

$^{13}\text{C}$  NMR (101 MHz, Chloroform-*d*)  $\delta$  172.61, 137.80, 127.11, 126.68, 121.83, 120.70, 119.32, 115.55, 109.29, 60.21, 46.24, 41.34, 32.77, 32.04, 28.78, 27.27, 24.43, 23.40, 19.16, 17.76.

**HRMS** (ESI)  $m/z$  Calcd for  $\text{C}_{20}\text{H}_{25}\text{N}_2\text{O}^+[\text{M}+\text{H}]^+$ : 309.1961, found: 309.1967.

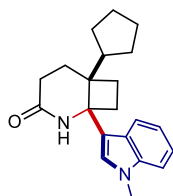

**3u**

Light yellow oil. ( $R_f$  = 0.40, DCM/MeOH = 50:1, v/v)

Compound **3u** is a previously unknown compound and was synthesized in 98% yield, dr >20:1 (63.2 mg, 0.2 mmol scale) following the **Condition [A]**.

$^1\text{H}$  NMR (400 MHz, Chloroform-*d*)  $\delta$  7.57 (d,  $J$  = 8.1 Hz, 1H), 7.24 (d,  $J$  = 1.5 Hz, 1H),

7.20 – 7.16 (m, 1H), 7.05 – 7.01 (m, 1H), 6.93 (s, 1H), 6.01 (s, 1H), 3.74 (s, 3H), 2.83 – 2.75 (m, 1H), 2.67 – 2.63 (m, 2H), 2.14 – 2.07 (m, 1H), 2.02 – 1.88 (m, 3H), 1.81 – 1.71 (m, 2H), 1.34 – 1.23 (m, 2H), 1.21 – 1.06 (m, 4H), 0.88 – 0.77 (m, 2H).

$^{13}\text{C}$  NMR (101 MHz, Chloroform-*d*)  $\delta$  172.82, 137.76, 127.53, 126.64, 121.85, 121.03, 119.41, 116.50, 109.36, 61.67, 48.27, 45.32, 32.91, 32.87, 29.18, 27.82, 27.63, 26.08, 25.81, 21.93.

HRMS (ESI)  $m/z$  Calcd for  $\text{C}_{21}\text{H}_{27}\text{N}_2\text{O}^+[\text{M}+\text{H}]^+$ : 323.2118, found: 323.2115.

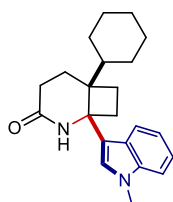

**3v**

Light yellow oil. ( $R_f$  = 0.30, DCM/MeOH = 50:1, v/v)

Compound **3v** is a previously unknown compound and was synthesized in 87% yield, dr >20:1 (58.5 mg, 0.2 mmol scale) following the **Condition [A]**.

$^1\text{H}$  NMR (400 MHz, Chloroform-*d*)  $\delta$  7.67 (d,  $J$  = 8.1 Hz, 1H), 7.23 (d,  $J$  = 4.4 Hz, 1H), 7.17 (t,  $J$  = 7.6 Hz, 1H), 7.04 (t,  $J$  = 7.6 Hz, 1H), 6.96 (s, 1H), 6.20 (s, 1H), 3.75 (s, 3H), 2.74 – 2.67 (m, 1H), 2.61 – 2.52 (m, 2H), 2.16 (dt,  $J$  = 12.5, 9.0 Hz, 1H), 2.02 – 1.94 (m, 1H), 1.84 (t,  $J$  = 8.4 Hz, 2H), 1.78 – 1.72 (m, 1H), 1.62 (d,  $J$  = 11.9 Hz, 1H), 1.49 (d,  $J$  = 12.5 Hz, 1H), 1.38 (d,  $J$  = 12.1 Hz, 1H), 1.17 (d,  $J$  = 12.5 Hz, 2H), 1.08 (d,  $J$  = 12.4 Hz, 1H), 0.97 – 0.90 (m, 1H), 0.88 – 0.77 (m, 2H), 0.73 – 0.63 (m, 1H), 0.33 – 0.22 (m, 1H).

$^{13}\text{C}$  NMR (101 MHz, Chloroform-*d*)  $\delta$  173.45, 137.60, 127.56, 126.58, 121.83, 121.16, 119.61, 115.90, 109.52, 62.11, 48.42, 44.81, 34.70, 32.98, 29.90, 28.71, 27.17, 27.05, 26.64, 26.39, 25.11, 24.79.

HRMS (ESI)  $m/z$  Calcd for  $\text{C}_{22}\text{H}_{29}\text{N}_2\text{O}^+[\text{M}+\text{H}]^+$ : 337.2274, found: 337.2274.

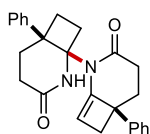

**4a**

White solid. ( $R_f$  = 0.30, DCM/MeOH = 50:1, v/v)

Compound **4a** is a previously unknown compound and was synthesized in 83% yield, dr >20:1 (49.6 mg, 0.3 mmol scale) following the **Condition [B]**.

**<sup>1</sup>H NMR** (400 MHz, Chloroform-*d*) δ 7.65 (dd, *J* = 6.9, 2.9 Hz, 2H), 7.40 – 7.32 (m, 3H), 7.15 – 7.02 (m, 3H), 7.00 – 6.89 (m, 1H), 6.55 – 6.38 (m, 2H), 4.89 (s, 1H), 3.20 – 3.12 (m, 1H), 3.04 (q, *J* = 10.5 Hz, 1H), 2.74 – 2.70 (m, 2H), 2.56 (dd, *J* = 11.6, 1.3 Hz, 1H), 2.51 – 2.41 (m, 2H), 2.33 – 2.25 (m, 2H), 2.22 (d, *J* = 11.6 Hz, 1H), 2.15 – 2.01 (m, 2H), 1.87 – 1.78 (m, 1H), 1.75 – 1.69 (m, 1H).

**<sup>13</sup>C NMR** (101 MHz, Chloroform-*d*) δ 171.76, 169.46, 142.86, 141.19, 140.60, 128.42, 127.58, 127.56, 126.20, 125.72, 103.96, 75.52, 50.25, 49.93, 40.95, 33.60, 32.35, 32.17, 28.38, 27.62, 22.43.

**HRMS** (ESI) *m/z* Calcd for C<sub>26</sub>H<sub>27</sub>N<sub>2</sub>O<sub>2</sub><sup>+</sup>[M+H]<sup>+</sup>: 399.2067, found: 399.2068.

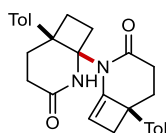

**4b**

White solid. (*R<sub>f</sub>* = 0.20, DCM/MeOH = 50:1, v/v)

Compound **4b** is a previously unknown compound and was synthesized in 76% yield, dr >20:1 (48.6 mg, 0.3 mmol scale) following the **Condition [B]**.

**<sup>1</sup>H NMR** (400 MHz, Chloroform-*d*) δ 7.53 (d, *J* = 8.1 Hz, 2H), 7.17 (d, *J* = 8.0 Hz, 2H), 6.90 (s, 1H), 6.84 (d, *J* = 7.7 Hz, 2H), 6.39 (d, *J* = 7.8 Hz, 2H), 4.86 (s, 1H), 3.18 – 3.09 (m, 1H), 3.01 (q, *J* = 10.5 Hz, 1H), 2.73 – 2.69 (m, 2H), 2.53 (dd, *J* = 11.6, 1.3 Hz, 1H), 2.48 – 2.39 (m, 5H), 2.29 – 2.24 (m, 5H), 2.18 (d, *J* = 11.5 Hz, 1H), 2.13 – 2.09 (m, 1H), 2.07 – 2.00 (m, 1H), 1.89 – 1.80 (m, 1H), 1.71 – 1.65 (m, 1H).

**<sup>13</sup>C NMR** (101 MHz, Chloroform-*d*) δ 171.72, 169.41, 141.26, 139.81, 137.50, 136.81, 135.53, 129.14, 128.84, 127.40, 125.62, 103.70, 75.35, 49.84, 49.59, 40.97, 33.43, 32.18, 28.33, 27.72, 22.23, 21.07.

**HRMS** (ESI) *m/z* Calcd for C<sub>28</sub>H<sub>31</sub>N<sub>2</sub>O<sub>2</sub><sup>+</sup>[M+H]<sup>+</sup>: 427.2380, found: 427.2390.

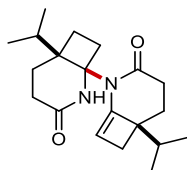

#### 4c

White solid. ( $R_f$  = 0.20, DCM/MeOH = 50:1, v/v)

Compound **4c** is a previously unknown compound and was synthesized in 98% yield, dr >20:1 (48.5 mg, 0.3 mmol scale) following the **Condition [B]**.

**$^1\text{H NMR}$**  (400 MHz, Chloroform-*d*)  $\delta$  6.48 (t,  $J$  = 13.3 Hz, 1H), 4.86 (s, 1H), 2.57 (t,  $J$  = 12.0 Hz, 1H), 2.46 – 2.40 (m, 4H), 2.22 – 2.17 (m, 2H), 2.06 – 1.98 (m, 2H), 1.97 – 1.93 (m, 1H), 1.89 – 1.81 (m, 2H), 1.74 (dd,  $J$  = 12.3, 5.3 Hz, 2H), 1.68 – 1.63 (m, 1H), 1.55 – 1.50 (m, 1H), 0.97 (d,  $J$  = 6.8 Hz, 3H), 0.91 (d,  $J$  = 6.7 Hz, 3H), 0.87 (d,  $J$  = 6.7 Hz, 3H), 0.75 (d,  $J$  = 6.7 Hz, 3H).

**$^{13}\text{C NMR}$**  (101 MHz, Chloroform-*d*)  $\delta$  171.75, 169.99, 142.40, 105.02, 75.27, 49.64, 48.31, 33.40, 31.78, 31.73, 31.17, 28.80, 27.71, 26.57, 23.86, 19.88, 18.25, 17.88, 17.55, 17.50.

**HRMS** (ESI)  $m/z$  Calcd for  $\text{C}_{20}\text{H}_{30}\text{N}_2\text{NaO}_2^+[\text{M}+\text{Na}]^+$ :353.2199, found: 353.2197.

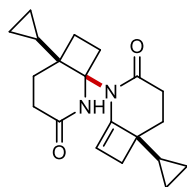

#### 4d

Light yellow solid. ( $R_f$  = 0.30, DCM/MeOH = 50:1, v/v)

Compound **4d** is a previously unknown compound and was synthesized in 99% yield, dr >20:1 (47.9 mg, 0.3 mmol scale) following the **Condition [B]**.

**$^1\text{H NMR}$**  (400 MHz, Chloroform-*d*)  $\delta$  6.31 (s, 1H), 4.75 (s, 1H), 2.85 – 2.75 (m, 1H), 2.51 – 2.38 (m, 5H), 2.10 – 2.04 (m, 2H), 1.99 – 1.90 (m, 3H), 1.77 – 1.69 (m, 1H), 1.46 – 1.41 (m, 1H), 0.96 (q,  $J$  = 8.1, 5.1 Hz, 2H), 0.86 (q,  $J$  = 7.2 Hz, 1H), 0.54 – 0.27 (m, 8H).

**$^{13}\text{C NMR}$**  (101 MHz, Chloroform-*d*)  $\delta$  171.85, 170.01, 140.81, 104.10, 75.12, 45.94, 44.83, 36.82, 32.83, 32.44, 31.82, 27.88, 27.45, 16.38, 15.42, 14.01, 3.87, 2.52, -0.04,

-0.44.

**HRMS** (ESI)  $m/z$  Calcd for  $C_{20}H_{27}N_2O_2^+[M+H]^+$ :327.2067, found: 327.2061.

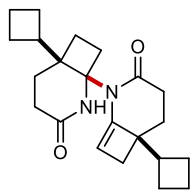

**4e**

Light yellow solid. ( $R_f$ = 0.30, DCM/MeOH = 50:1, v/v)

Compound **4e** is a previously unknown compound and was synthesized in 99% yield, dr >20:1 (52.3 mg, 0.3 mmol scale) following the **Condition [B]**.

**$^1H$  NMR** (400 MHz, Chloroform-*d*)  $\delta$  6.49 (s, 1H), 4.80 (s, 1H), 2.61 (s, 1H), 2.50 – 2.34 (m, 7H), 2.14 – 1.95 (m, 4H), 1.82 (s, 5H), 1.74 – 1.62 (m, 10H), 1.32 (d,  $J$  = 13.4 Hz, 1H).

**$^{13}C$  NMR** (101 MHz, Chloroform-*d*)  $\delta$  171.87, 169.62, 140.70, 103.81, 74.36, 47.74, 45.67, 39.79, 35.73, 32.94, 32.66, 31.73, 28.04, 27.57, 24.69, 23.95, 23.88, 23.71, 22.90, 18.16, 17.66, 17.24.

**HRMS** (ESI)  $m/z$  Calcd for  $C_{22}H_{30}N_2NaO_2^+[M+Na]^+$ :377.2199, found: 377.2202.

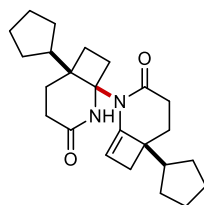

**4f**

Light yellow solid. ( $R_f$ = 0.30, DCM/MeOH = 50:1, v/v)

Compound **4f** is a previously unknown compound and was synthesized in 98% yield, dr >20:1 (56.2 mg, 0.3 mmol scale) following the **Condition [B]**.

**$^1H$  NMR** (400 MHz, Chloroform-*d*)  $\delta$  6.18 (s, 1H), 4.83 (s, 1H), 2.61 – 2.52 (m, 2H), 2.47 (t,  $J$  = 12.0 Hz, 3H), 2.33 – 2.09 (m, 4H), 2.03 – 1.93 (m, 3H), 1.90 – 1.78 (m, 4H), 1.63 – 1.48 (m, 12H), 1.40 – 1.29 (m, 2H), 1.12 (q,  $J$  = 9.6, 8.8 Hz, 2H).

**$^{13}C$  NMR** (101 MHz, Chloroform-*d*)  $\delta$  171.74, 169.84, 143.18, 104.17, 75.16, 48.52, 47.49, 44.10, 38.36, 33.40, 33.04, 31.67, 30.03, 29.33, 28.71, 27.87, 27.53, 27.11, 26.97,

26.59, 25.85, 25.63, 24.63, 18.37.

**HRMS** (ESI)  $m/z$  Calcd for  $C_{24}H_{35}N_2O_2^+[M+H]^+$ :383.2693, found: 383.2698.

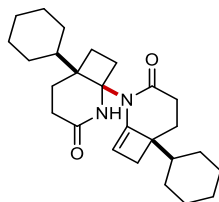

**4g**

Light yellow oil. ( $R_f$  = 0.40, DCM/MeOH = 50:1, v/v)

Compound **4g** is a previously unknown compound and was synthesized in 99% yield, dr >20:1 (60.2 mg, 0.3 mmol scale) following the **Condition [B]**.

**$^1H$  NMR** (400 MHz, Chloroform-*d*)  $\delta$  6.35 (s, 1H), 4.83 (s, 1H), 2.55 (d,  $J$  = 10.8 Hz, 1H), 2.49 – 2.37 (m, 4H), 2.27 (d,  $J$  = 11.9 Hz, 1H), 2.19 (d,  $J$  = 8.7 Hz, 1H), 2.08 (d,  $J$  = 11.6 Hz, 1H), 1.98 (t,  $J$  = 12.0 Hz, 1H), 1.88 (d,  $J$  = 12.0 Hz, 1H), 1.77 – 1.68 (m, 10H), 1.62 – 1.53 (m, 5H), 1.43 (t,  $J$  = 12.0 Hz, 1H), 1.18 – 1.07 (m, 8H), 0.95 – 0.83 (m, 2H).

**$^{13}C$  NMR** (101 MHz, Chloroform-*d*)  $\delta$  171.58, 170.02, 142.00, 104.71, 75.54, 49.42, 48.11, 41.82, 37.27, 33.58, 33.40, 31.76, 29.78, 28.42, 27.88, 27.72, 27.50, 27.10, 26.76, 26.72, 26.54, 26.46, 24.44, 18.64.

**HRMS** (ESI)  $m/z$  Calcd for  $C_{26}H_{38}N_2NaO_2^+[M+Na]^+$ :433.2825, found: 433.2833.

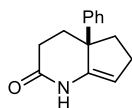

**4h'**

Yellow solid. ( $R_f$  = 0.40, DCM/MeOH = 50:1, v/v)

Compound **4h'** is a previously known compound and was synthesized in 97% yield (41.3 mg, 0.2 mmol scale) following the **Condition [A]**.<sup>[3]</sup>

**$^1H$  NMR** (400 MHz, Chloroform-*d*) 9.58 (s, 1H), 7.31 (s, 4H), 7.23 (s, 1H), 5.18 (s, 1H), 2.47 (d,  $J$  = 10.5 Hz, 1H), 2.35 (d,  $J$  = 15.6 Hz, 1H), 2.20 – 2.10 (m, 3H), 2.03 – 1.93 (m, 3H).

**$^{13}C$  NMR** (101 MHz, Chloroform-*d*)  $\delta$  171.90, 142.75, 141.58, 128.64, 126.62, 126.42, 105.29, 50.76, 41.33, 32.90, 29.49, 27.94.

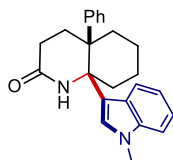

**4i**

Yellow solid. ( $R_f = 0.40$ , DCM/MeOH = 50:1, v/v)

Compound **4i** is a previously unknown compound and was synthesized in 47% yield, dr >20:1 (33.7 mg, 0.2 mmol scale) following the **Condition [A]**.

$^1\text{H NMR}$  (400 MHz, Chloroform-*d*) 7.36 – 7.30 (m, 2H), 7.26 (s, 1H), 7.25 – 7.18 (m, 4H), 7.13 – 7.09 (m, 1H), 6.83 – 6.76 (m, 3H), 3.80 (s, 3H), 2.53 – 2.41 (m, 2H), 2.39 – 2.31 (m, 1H), 2.26 – 2.09 (m, 2H), 1.85 – 1.78 (m, 1H), 1.74 – 1.68 (m, 2H), 1.57 – 1.47 (m, 2H), 1.34 – 1.28 (m, 1H), 1.15 (s, 1H).

$^{13}\text{C NMR}$  (101 MHz, Chloroform-*d*)  $\delta$  173.01, 144.26, 137.14, 128.05, 127.78, 127.19, 127.11, 126.39, 121.94, 120.88, 119.55, 117.02, 109.48, 68.53, 49.54, 35.37, 33.56, 33.09, 30.80, 28.42, 25.51, 24.99.

**HRMS** (ESI)  $m/z$  Calcd for  $\text{C}_{24}\text{H}_{27}\text{N}_2\text{O}^+[\text{M}+\text{H}]^+$ : 359.2118, found: 359.2126.

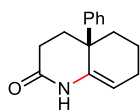

**4i'**

Yellow solid. ( $R_f = 0.40$ , DCM/MeOH = 50:1, v/v)

Compound **4i'** is a previously unknown compound and was synthesized in 45% yield (20.4 mg, 0.2 mmol scale) following the condition. *Note: the conditions are the same as Condition [B], except that HFIP (0.5 M) is used as the solvent.*

$^1\text{H NMR}$  (400 MHz, Chloroform-*d*) 7.70 (s, 1H), 7.33 – 7.26 (m, 5H), 7.21 (d,  $J = 7.0$  Hz, 1H), 5.04 (s, 1H), 3.02 (s, 2H), 2.24 – 2.18 (m, 2H), 2.04 – 1.97 (m, 2H), 1.75 (s, 4H).

$^{13}\text{C NMR}$  (101 MHz, Chloroform-*d*)  $\delta$  180.40, 148.57, 144.44, 128.57, 126.78, 125.33, 98.34, 51.82, 37.79, 36.25, 34.40, 23.36.

**HRMS** (ESI)  $m/z$  Calcd for  $\text{C}_{15}\text{H}_{18}\text{NO}^+[\text{M}+\text{H}]^+$ : 228.1383, found: 228.1387.

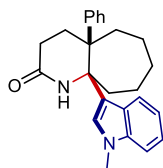

### 4j

Yellow liquid. ( $R_f$  = 0.60, PE/EA/MeOH = 2:1:0.2, v/v/v)

Compound **4j** is a previously unknown compound and was synthesized in 37% yield, dr >20:1 (28.9 mg, 0.2 mmol scale) following the **Condition [A]**.

$^1\text{H NMR}$  (400 MHz, Chloroform-*d*)  $\delta$  7.46 (s, 1H), 7.33 – 7.24 (m, 3H), 7.21 (d,  $J$  = 6.6 Hz, 3H), 7.09 (t,  $J$  = 7.6 Hz, 1H), 6.79 (t,  $J$  = 7.6 Hz, 1H), 6.71 (d,  $J$  = 8.2 Hz, 1H), 6.54 (s, 1H), 3.81 (s, 3H), 2.59 – 2.36 (m, 2H), 2.23 – 2.16 (m, 1H), 2.12 – 1.96 (m, 2H), 1.77 – 1.64 (m, 4H), 1.62 – 1.58 (m, 1H), 1.54 – 1.47 (m, 2H), 1.42 – 1.31 (m, 1H), 1.21 – 1.10 (m, 1H).

$^{13}\text{C NMR}$  (101 MHz, Chloroform-*d*)  $\delta$  172.60, 143.74, 136.86, 128.94, 127.60, 127.33, 126.99, 126.64, 122.02, 121.15, 119.66, 116.41, 109.43, 70.00, 39.90, 33.08, 31.17, 29.06, 27.73, 25.97, 22.96, 22.06, 21.65.

**HRMS** (ESI)  $m/z$  Calcd for  $\text{C}_{25}\text{H}_{29}\text{N}_2\text{O}^+[\text{M}+\text{H}]^+$ : 373.2274, found: 373.2284.

### 4.2 Nitrene-triggered carbocationic rearrangement of tetrasubstituted alkenes: the substrate scope of nucleophiles.

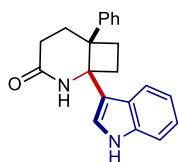

### 5a

Gray solid. ( $R_f$  = 0.35, PE/EA/MeOH = 2:1:0.2, v/v/v)

Compound **5a** is a previously unknown compound and was synthesized in 78% yield, dr >20:1 (49.8 mg, 0.2 mmol scale) following the **Condition [A]**.

$^1\text{H NMR}$  (400 MHz, DMSO-*d*<sub>6</sub>)  $\delta$  10.76 (s, 1H), 7.97 (s, 1H), 7.54 (d,  $J$  = 7.9 Hz, 1H), 7.16 (d,  $J$  = 7.9 Hz, 1H), 7.04 (d,  $J$  = 2.6 Hz, 1H), 6.95 – 6.91 (m, 3H), 6.90 – 6.86 (m, 1H), 6.84 – 6.76 (m, 3H), 2.67 – 2.61 (m, 1H), 2.56 – 2.46 (m, 1H), 2.41 – 2.32 (m, 3H), 2.30 – 2.16 (m, 2H), 2.05 – 1.94 (m, 1H).

$^{13}\text{C NMR}$  (101 MHz, DMSO-*d*<sub>6</sub>)  $\delta$  171.14, 145.56, 136.44, 127.10, 126.31, 126.29,

125.36, 123.39, 120.58, 120.39, 118.50, 117.22, 111.50, 61.85, 49.73, 34.85, 34.55, 28.56, 25.75.

**HRMS** (ESI)  $m/z$  Calcd for  $C_{21}H_{21}N_2O^+[M+H]^+$ : 317.1648, found: 317.1652.

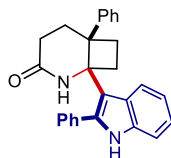

**5b**

Light yellow solid. ( $R_f$  = 0.40, DCM/MeOH = 50:1, v/v)

Compound **5b** is a previously unknown compound and was synthesized in 97% yield, dr >20:1 (78.6 mg, 0.2 mmol scale) following the **Condition [A]**.

**$^1H$  NMR** (400 MHz, DMSO- $d_6$ )  $\delta$  10.70 (s, 1H), 8.07 (s, 1H), 7.45 (d,  $J$  = 8.0 Hz, 1H), 7.27 – 7.21 (m, 4H), 7.08 (d,  $J$  = 8.0 Hz, 1H), 6.93 (t,  $J$  = 7.5 Hz, 1H), 6.88 (d,  $J$  = 7.5 Hz, 2H), 6.85 – 6.72 (m, 5H), 2.68 – 2.58 (m, 1H), 2.52 – 2.38 (m, 2H), 2.30 – 2.20 (m, 1H), 2.14 – 2.07 (m, 1H), 1.89 – 1.84 (m, 1H), 1.73 – 1.51 (m, 2H).

**$^{13}C$  NMR** (101 MHz, DMSO- $d_6$ )  $\delta$  169.82, 143.42, 136.68, 135.47, 134.30, 128.12, 127.74, 127.40, 127.30, 126.98, 126.57, 125.69, 120.98, 120.51, 118.73, 113.23, 110.89, 63.76, 49.90, 36.12, 33.34, 29.99, 28.75.

**HRMS** (ESI)  $m/z$  Calcd for  $C_{27}H_{25}N_2O^+[M+H]^+$ : 393.1961, found: 393.1957.

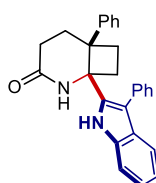

**5c**

White solid. ( $R_f$  = 0.40, PE/EA/MeOH = 2:1:0.2, v/v/v)

Compound **5c** is a previously unknown compound and was synthesized in 54% yield, dr >20:1 (42.3 mg, 0.2 mmol scale) following the **Condition [A]**.

**$^1H$  NMR** (400 MHz, Methanol- $d_4$ )  $\delta$  7.34 (d,  $J$  = 8.1 Hz, 1H), 7.31 – 7.26 (m, 3H), 7.09 – 7.06 (m, 6H), 6.98 – 6.80 (m, 4H), 2.74 – 2.60 (m, 2H), 2.54 (dt,  $J$  = 17.9, 5.0 Hz, 1H), 2.43 – 2.26 (m, 3H), 2.07 – 2.00 (m, 1H), 1.93 – 1.87 (m, 1H).

**$^{13}C$  NMR** (101 MHz, Methanol- $d_4$ )  $\delta$  174.57, 144.47, 136.89, 136.33, 134.42, 132.38, 130.87, 129.86, 129.36, 128.73, 128.57, 127.69, 127.63, 127.30, 122.91, 120.05, 119.73,

117.83, 111.65, 65.45, 51.76, 33.49, 32.42, 29.46, 24.72.

**HRMS** (ESI)  $m/z$  Calcd for  $C_{27}H_{25}N_2O^+[M+H]^+$ : 393.1961, found: 393.1964.

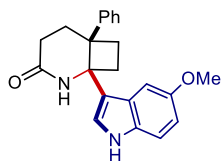

**5d**

Brown green solid. ( $R_f$  = 0.30, PE/EA/MeOH = 2:1:0.2, v/v/v)

Compound **5d** is a previously unknown compound and was synthesized in 99% yield, dr >20:1 (68.5 mg, 0.2 mmol scale) following the **Condition [A]**.

**$^1H$  NMR** (400 MHz, Chloroform- $d$ )  $\delta$  8.25 (s, 1H), 7.10 (d,  $J$  = 8.8 Hz, 1H), 7.07 – 7.04 (m, 3H), 7.00 – 6.93 (m, 3H), 6.77 (dd,  $J$  = 8.8, 2.4 Hz, 1H), 6.69 (d,  $J$  = 2.7 Hz, 1H), 6.46 (s, 1H), 3.80 (s, 3H), 2.76 – 2.64 (m, 3H), 2.63 – 2.56 (m, 1H), 2.53 – 2.46 (m, 1H), 2.39 – 2.28 (m, 2H), 2.28 – 2.17 (m, 1H).

**$^{13}C$  NMR** (101 MHz, Chloroform- $d$ )  $\delta$  173.24, 154.00, 144.70, 131.73, 127.56, 126.57, 126.20, 126.08, 123.08, 117.43, 112.30, 112.23, 102.36, 62.67, 56.05, 50.41, 35.17, 34.69, 29.12, 25.73.

**HRMS** (ESI)  $m/z$  Calcd for  $C_{22}H_{23}N_2O_2^+[M+H]^+$ : 347.1754, found: 347.1755.

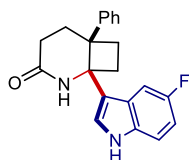

**5e**

White solid. ( $R_f$  = 0.25, PE/EA/MeOH = 2:1:0.2, v/v/v)

Compound **5e** is a previously unknown compound and was synthesized in 77% yield, dr >20:1 (51.4 mg, 0.2 mmol scale) following the **Condition [A]**.

**$^1H$  NMR** (400 MHz, DMSO- $d_6$ )  $\delta$  10.86 (s, 1H), 8.05 (s, 1H), 7.22 – 7.07 (m, 3H), 6.91 – 6.89 (m, 2H), 6.87 – 6.72 (m, 4H), 2.63 – 2.57 (m, 1H), 2.51 – 2.44 (m, 1H), 2.40 – 2.29 (m, 3H), 2.26 – 2.18 (m, 2H), 2.02 – 1.95 (m, 1H).

**$^{13}C$  NMR** (101 MHz, DMSO- $d_6$ )  $\delta$  171.32, 156.38 (d,  $J$  = 230.7 Hz), 145.44, 133.04, 127.12, 126.42 (d,  $J$  = 9.9 Hz), 126.27, 125.39, 117.52 (d,  $J$  = 4.7 Hz), 112.30 (d,  $J$  = 11.0 Hz), 108.71 (d,  $J$  = 25.9 Hz), 105.00 (d,  $J$  = 23.4 Hz), 61.62, 49.72, 34.90, 34.42,

28.51, 25.83.

$^{19}\text{F}$  NMR (376 MHz,  $\text{DMSO-}d_6$ )  $\delta$  -124.88.

HRMS (ESI)  $m/z$  Calcd for  $\text{C}_{21}\text{H}_{20}\text{FN}_2\text{O}^+[\text{M}+\text{H}]^+$ : 335.1554, found: 335.1562.

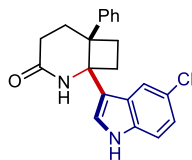

**5f**

Grass green solid. ( $R_f$  = 0.30, PE/EA/MeOH = 2:1:0.2, v/v/v)

Compound **5f** is a previously unknown compound and was synthesized in 99% yield, dr >20:1 (69.3 mg, 0.2 mmol scale) following the **Condition [A]**.

$^1\text{H}$  NMR (400 MHz,  $\text{DMSO-}d_6$ )  $\delta$  11.06 (s, 1H), 8.20 (s, 1H), 7.57 (d,  $J$  = 2.1 Hz, 1H), 7.30 – 7.18 (m, 2H), 7.07 – 6.96 (m, 3H), 6.96 – 6.87 (m, 3H), 2.73 – 2.67 (m, 1H), 2.60 – 2.53 (m, 1H), 2.49 – 2.39 (m, 3H), 2.36 – 2.26 (m, 2H), 2.16 – 2.03 (m, 1H).

$^{13}\text{C}$  NMR (101 MHz,  $\text{DMSO-}d_6$ )  $\delta$  171.40, 145.32, 134.87, 127.37, 127.13, 126.27, 125.46, 125.20, 123.06, 120.53, 119.53, 117.21, 112.95, 61.64, 49.74, 34.99, 34.32, 28.59, 25.72.

HRMS (ESI)  $m/z$  Calcd for  $\text{C}_{21}\text{H}_{20}\text{ClN}_2\text{O}^+[\text{M}+\text{H}]^+$ : 351.1259, found: 351.1262.

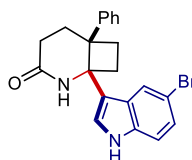

**5g**

White solid. ( $R_f$  = 0.30, PE/EA/MeOH = 2:1:0.2, v/v/v)

Compound **5g** is a previously unknown compound and was synthesized in 73% yield, dr >20:1 (57.5 mg, 0.2 mmol scale) following the **Condition [A]**.

$^1\text{H}$  NMR (400 MHz,  $\text{DMSO-}d_6$ )  $\delta$  10.98 (s, 1H), 8.11 (s, 1H), 7.64 (s, 1H), 7.21 – 7.09 (m, 2H), 7.05 (d,  $J$  = 8.7 Hz, 1H), 6.92 (d,  $J$  = 7.3 Hz, 2H), 6.88 – 6.82 (m, 3H), 2.66 – 2.60 (m, 1H), 2.53 – 2.48 (m, 1H), 2.41 – 2.33 (m, 3H), 2.28 – 2.18 (m, 2H), 2.06 – 1.99 (m, 1H).

$^{13}\text{C}$  NMR (101 MHz,  $\text{DMSO-}d_6$ )  $\delta$  171.30, 145.25, 135.04, 128.04, 127.08, 126.23, 125.42, 125.00, 123.01, 122.51, 117.11, 113.36, 111.12, 61.62, 49.70, 34.93, 34.26,

28.60, 25.64.

**HRMS** (ESI)  $m/z$  Calcd for  $C_{21}H_{20}BrN_2O^+[M+H]^+$ : 395.0754, found: 395.0762.

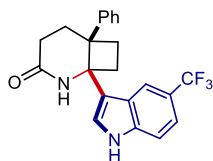

**5h**

White solid. ( $R_f$  = 0.30, PE/EA/MeOH = 2:1:0.2, v/v/v)

Compound **5h** is a previously unknown compound and was synthesized in 80% yield, dr >20:1 (61.5 mg, 0.2 mmol scale) following the **Condition [A]**.

**$^1H$  NMR** (400 MHz, DMSO- $d_6$ )  $\delta$  11.23 (s, 1H), 8.17 (s, 1H), 7.81 (s, 1H), 7.34 (d,  $J$  = 8.5 Hz, 1H), 7.29 (d,  $J$  = 2.4 Hz, 1H), 7.21 (d,  $J$  = 8.7 Hz, 1H), 6.98 – 6.88 (m, 2H), 6.84 – 6.79 (m, 3H), 2.73 – 2.67 (m, 1H), 2.61 – 2.50 (m, 1H), 2.47 – 2.36 (m, 3H), 2.32 – 2.19 (m, 2H), 2.11 – 2.05 (m, 1H).

**$^{13}C$  NMR** (101 MHz, DMSO- $d_6$ )  $\delta$  171.45, 145.03, 137.93, 126.99, 126.21, 125.69, 125.64 (q,  $J$  = 270.6 Hz), 125.42, 119.08 (q,  $J$  = 30.2 Hz), 118.36, 117.87 (q,  $J$  = 5.0 Hz), 116.89 (q,  $J$  = 3.6 Hz), 112.09, 61.65, 49.64, 34.81, 34.08, 28.75, 25.59.

**$^{19}F$  NMR** (376 MHz, DMSO- $d_6$ )  $\delta$  -58.38.

**HRMS** (ESI)  $m/z$  Calcd for  $C_{22}H_{20}F_3N_2O^+[M+H]^+$ : 385.1522, found: 385.1530.

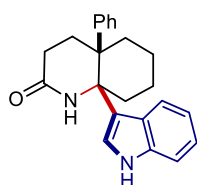

**5i**

White solid. ( $R_f$  = 0.40, PE/EA/MeOH = 2:1:0.2, v/v/v)

Compound **5i** is a previously unknown compound and was synthesized in 41% yield, dr >20:1 (28.2 mg, 0.2 mmol scale) following the **Condition [A]**.

**$^1H$  NMR** (400 MHz, DMSO- $d_6$ )  $\delta$  11.07 (s, 1H), 7.83 (s, 1H), 7.51 (d,  $J$  = 2.7 Hz, 1H), 7.38 – 7.28 (m, 3H), 7.28 – 7.17 (m, 3H), 7.03 – 6.92 (m, 2H), 6.71 (t,  $J$  = 7.7 Hz, 1H), 2.46 – 2.29 (m, 2H), 2.24 – 2.13 (m, 2H), 2.06 – 1.99 (m, 1H), 1.85 – 1.79 (m, 1H),

1.75 – 1.69 (m, 1H), 1.52 – 1.45 (m, 1H), 1.43 – 1.30 (m, 2H), 1.22 – 1.10 (m, 1H), 0.69 (s, 1H).

<sup>13</sup>C NMR (101 MHz, DMSO-*d*<sub>6</sub>) δ 171.40, 143.41, 136.32, 128.38, 127.20, 126.61, 125.88, 123.52, 120.97, 120.88, 118.37, 118.04, 111.39, 67.36, 48.77, 34.60, 34.03, 31.16, 28.37, 25.23, 24.61.

HRMS (ESI) *m/z* Calcd for C<sub>23</sub>H<sub>25</sub>N<sub>2</sub>O<sup>+</sup>[M+H]<sup>+</sup>: 345.1961, found: 345.1966.

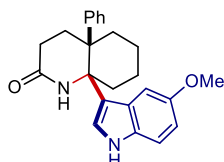

### 5j

Brown solid. (*R<sub>f</sub>* = 0.40, PE/EA/MeOH = 2:1:0.2, v/v/v)

Compound **5j** is a previously unknown compound and was synthesized in 50% yield, dr >20:1 (37.8 mg, 0.2 mmol scale) following the condition. *Note: the conditions are the same as Condition [A], except that the reaction temperature of 50 °C.*

<sup>1</sup>H NMR (400 MHz, DMSO-*d*<sub>6</sub>) δ 10.91 (s, 1H), 7.94 (s, 1H), 7.47 (d, *J* = 2.7 Hz, 1H), 7.32 (d, *J* = 6.6 Hz, 2H), 7.28 – 7.18 (m, 4H), 6.63 (dd, *J* = 8.8, 2.4 Hz, 1H), 6.33 (d, *J* = 2.6 Hz, 1H), 3.44 (s, 3H), 2.39 – 2.31 (m, 2H), 2.25 – 2.14 (m, 2H), 2.06 – 2.01 (m, 1H), 1.82 – 1.70 (m, 2H), 1.52 – 1.45 (m, 1H), 1.43 – 1.30 (m, 2H), 1.21 – 1.15 (m, 1H), 0.72 (s, 1H).

<sup>13</sup>C NMR (101 MHz, DMSO-*d*<sub>6</sub>) δ 171.46, 152.51, 143.52, 131.52, 128.50, 127.18, 126.52, 126.34, 124.17, 117.68, 111.80, 110.51, 103.54, 67.29, 55.14, 48.77, 34.67, 34.08, 31.14, 28.38, 25.18, 24.68.

HRMS (ESI) *m/z* Calcd for C<sub>24</sub>H<sub>27</sub>N<sub>2</sub>O<sub>2</sub><sup>+</sup>[M+H]<sup>+</sup>: 375.2067, found: 375.2077.

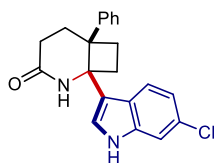

### 5k

White solid. (*R<sub>f</sub>* = 0.30, PE/EA/MeOH = 2:1:0.2, v/v/v)

Compound **5k** is a previously unknown compound and was synthesized in 85% yield, dr >20:1 (57.9 mg, 0.2 mmol scale) following the **Condition [A]**.

**<sup>1</sup>H NMR** (400 MHz, DMSO-*d*<sub>6</sub>) δ 10.86 (s, 1H), 8.00 (s, 1H), 7.46 (d, *J* = 8.6 Hz, 1H), 7.15 (d, *J* = 1.9 Hz, 1H), 7.06 (d, *J* = 2.6 Hz, 1H), 6.88 – 6.83 (m, 3H), 6.82 – 6.74 (m, 3H), 2.66 – 2.55 (m, 1H), 2.50 – 2.41 (m, 1H), 2.36 – 2.27 (m, 3H), 2.24 – 2.10 (m, 2H), 2.02 – 1.92 (m, 1H).

**<sup>13</sup>C NMR** (101 MHz, DMSO-*d*<sub>6</sub>) δ 171.32, 145.31, 136.85, 127.14, 126.27, 125.44, 125.32, 125.09, 124.55, 121.72, 118.73, 117.61, 111.01, 61.68, 49.66, 34.79, 34.30, 28.60, 25.63.

**HRMS** (ESI) *m/z* Calcd for C<sub>21</sub>H<sub>20</sub>ClN<sub>2</sub>O<sup>+</sup>[M+H]<sup>+</sup>: 351.1259, found: 351.1258.

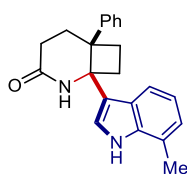

### 5l

Yellow solid. (*R<sub>f</sub>* = 0.45, PE/EA/MeOH = 2:1:0.2, v/v/v)

Compound **5l** is a previously unknown compound and was synthesized in 97% yield, dr >20:1 (90.3 mg, 0.2 mmol scale) following the **Condition [A]**.

**<sup>1</sup>H NMR** (400 MHz, Chloroform-*d*) δ 8.37 (s, 1H), 7.54 (d, *J* = 8.1 Hz, 1H), 7.07 (d, *J* = 7.3 Hz, 2H), 7.03 – 6.86 (m, 5H), 6.66 (d, *J* = 2.7 Hz, 1H), 6.57 (s, 1H), 2.78 – 2.57 (m, 4H), 2.57 – 2.46 (m, 1H), 2.40 – 2.29 (m, 5H), 2.28 – 2.18 (m, 1H).

**<sup>13</sup>C NMR** (101 MHz, Chloroform-*d*) δ 173.12, 144.85, 136.09, 127.57, 126.52, 126.00, 125.34, 122.57, 122.18, 120.69, 120.14, 118.06, 117.94, 62.60, 50.35, 35.48, 34.91, 29.01, 25.70, 16.64.

**HRMS** (ESI) *m/z* Calcd for C<sub>22</sub>H<sub>23</sub>N<sub>2</sub>O<sup>+</sup>[M+H]<sup>+</sup>: 331.1805, found: 331.1807.

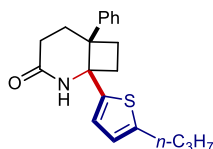

### 5m

Pink oil. (*R<sub>f</sub>* = 0.30, PE/EA/MeOH = 2:1:0.2, v/v/v)

Compound **5m** is a previously unknown compound and was synthesized in 35% yield, dr >20:1 (22.7 mg, 0.2 mmol scale) following the condition. *Note: the conditions are the same as Condition [A], except that Nu-H 2 (0.3 mmol, 1.5 equiv.), dioxazolone*

substrate **1** (0.2 mmol).

**<sup>1</sup>H NMR** (400 MHz, Chloroform-*d*)  $\delta$  7.12 (t,  $J = 7.3$  Hz, 2H), 7.06 (t,  $J = 7.1$  Hz, 1H), 6.99 (d,  $J = 7.0$  Hz, 2H), 6.65 (d,  $J = 3.6$  Hz, 1H), 6.56 – 6.32 (m, 2H), 2.75 – 2.55 (m, 6H), 2.53 – 2.46 (m, 1H), 2.44 – 2.27 (m, 2H), 2.17 – 2.10 (m, 1H), 1.51 (h,  $J = 7.3$  Hz, 2H), 0.81 (t,  $J = 7.3$  Hz, 3H).

**<sup>13</sup>C NMR** (101 MHz, Chloroform-*d*)  $\delta$  172.83, 145.08, 144.70, 144.64, 127.72, 126.42, 126.07, 124.24, 123.68, 63.90, 50.80, 36.89, 35.54, 31.97, 28.66, 26.40, 24.80, 13.38.

**HRMS** (ESI)  $m/z$  Calcd for C<sub>20</sub>H<sub>24</sub>N<sub>2</sub>OS<sup>+</sup>[M+H]<sup>+</sup>: 326.1573, found: 326.1576.

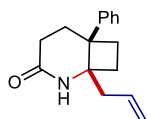

**5n**

Yellow oil. ( $R_f = 0.45$ , PE/EA/MeOH = 2:1:0.2, v/v/v)

Compound **5n** is a previously unknown compound and was synthesized in 45% yield, dr >20:1 (21.7 mg, 0.2 mmol scale) following the **Condition [A]**. *Note: the conditions are the same as **Condition [A]**, except that HFIP (0.5 M) is used as the solvent.*

**<sup>1</sup>H NMR** (400 MHz, Chloroform-*d*)  $\delta$  7.34 (t,  $J = 7.5$  Hz, 2H), 7.24 (t,  $J = 7.4$  Hz, 1H), 7.13 (d,  $J = 7.6$  Hz, 2H), 6.18 (s, 1H), 5.78 – 5.68 (m, 1H), 5.18 (dd,  $J = 20.5, 13.5$  Hz, 2H), 2.62 – 2.43 (m, 2H), 2.42 – 2.30 (m, 2H), 2.26 – 2.12 (m, 3H), 2.10 – 2.05 (m, 2H), 2.03 – 1.95 (m, 1H).

**<sup>13</sup>C NMR** (101 MHz, Chloroform-*d*)  $\delta$  173.06, 144.44, 131.73, 128.31, 126.64, 126.53, 120.96, 59.13, 48.11, 41.60, 35.60, 31.32, 29.13, 25.36.

**HRMS** (ESI)  $m/z$  Calcd for C<sub>16</sub>H<sub>20</sub>NO<sup>+</sup>[M+H]<sup>+</sup>: 242.1539, found: 242.1547.

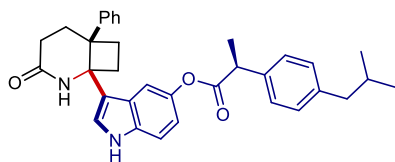

**5o**

Colorless oil. ( $R_f = 0.60$ , PE/EA/MeOH = 2:1:0.2, v/v/v)

Compound **5o** is a previously unknown compound and was synthesized in 60% yield, dr >20:1 (61.3 mg, 0.2 mmol scale) following the **Condition [A]**.

**<sup>1</sup>H NMR** (400 MHz, Chloroform-*d*)  $\delta$  8.65 – 8.62 (m, 1H), 7.43 – 7.33 (m, 2H), 7.19 (d,  $J = 7.2$  Hz, 3H), 7.03 – 6.89 (m, 4H), 6.89 – 6.79 (m, 3H), 6.61 – 6.49 (m, 2H), 3.99 (q,  $J = 7.1$  Hz, 1H), 2.76 – 2.53 (m, 4H), 2.50 (d,  $J = 7.2$  Hz, 2H), 2.45 – 2.37 (m, 1H), 2.35 – 2.14 (m, 3H), 1.93 – 1.86 (m, 1H), 1.64 (dd,  $J = 7.1, 3.2$  Hz, 3H), 0.94 (d,  $J = 6.8$  Hz, 6H).

**<sup>13</sup>C NMR** (101 MHz, Chloroform-*d*)  $\delta$  174.50, 173.66, 144.42, 144.37, 144.17, 140.78, 140.75, 137.74, 137.69, 134.38, 129.60, 129.28, 127.53, 127.49, 127.36, 127.32, 126.40, 126.04, 126.01, 125.70, 125.67, 124.00, 117.18, 115.81, 112.14, 112.05, 111.92, 62.51, 62.48, 50.35, 45.33, 45.14, 35.06, 34.61, 34.43, 30.28, 30.20, 29.03, 25.28, 22.51, 22.47, 18.73.

**HRMS** (ESI)  $m/z$  Calcd for  $C_{34}H_{37}N_2O_3^+[M+H]^+$ : 521.2799, found: 521.2802.

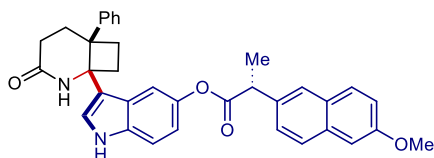

**5p**

White solid. ( $R_f = 0.30$ , PE/EA/MeOH = 2:1:0.2, v/v/v)

Compound **5p** is a previously unknown compound and was synthesized in 97% yield, dr >20:1 (105.7 mg, 0.2 mmol scale) following the **Condition [A]**.

**<sup>1</sup>H NMR** (400 MHz, Chloroform-*d*)  $\delta$  8.41 (t,  $J = 2.9$  Hz, 1H), 7.84 – 7.73 (m, 3H), 7.55 (dt,  $J = 8.5, 1.9$  Hz, 1H), 7.23 – 7.13 (m, 3H), 7.02 – 6.79 (m, 6H), 6.63 – 6.51 (m, 2H), 6.47 (d,  $J = 6.7$  Hz, 1H), 4.14 (q,  $J = 7.1$  Hz, 1H), 3.91 (s, 3H), 2.69 – 2.54 (m, 3H), 2.55 – 2.46 (m, 1H), 2.45 – 2.35 (m, 1H), 2.29 – 2.13 (m, 3H), 1.72 (dd,  $J = 7.1, 3.4$  Hz, 3H).

**<sup>13</sup>C NMR** (101 MHz, Chloroform-*d*)  $\delta$  174.26, 173.28, 173.24, 157.73, 144.36, 144.31, 135.60, 135.57, 134.25, 133.83, 129.41, 129.39, 129.07, 127.47, 127.43, 126.37, 126.35, 126.32, 126.21, 125.97, 125.68, 123.79, 119.09, 117.55, 115.94, 115.86, 112.20, 112.08, 111.83, 105.69, 62.44, 62.40, 55.36, 50.34, 45.63, 45.61, 35.08, 34.53, 34.37, 29.11, 25.22, 25.15, 18.60.

**HRMS** (ESI)  $m/z$  Calcd for  $C_{35}H_{33}N_2O_4^+[M+H]^+$ : 545.2435, found: 545.2439.

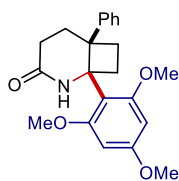

### 5q

White solid. ( $R_f$  = 0.60, PE/EA/MeOH = 2:1:0.2, v/v/v)

Compound **5q** is a previously unknown compound and was synthesized in 89% yield, dr >20:1 (64.9 mg, 0.2 mmol scale) following the **Condition [A]**.

$^1\text{H NMR}$  (400 MHz, Chloroform-*d*)  $\delta$  7.30 (d,  $J$  = 7.5 Hz, 2H), 7.12 (t,  $J$  = 7.5 Hz, 2H), 7.04 (t,  $J$  = 7.2 Hz, 1H), 5.96 (s, 1H), 5.82 (s, 2H), 3.69 (s, 3H), 3.62 – 3.27 (m, 7H), 2.91 – 2.77 (m, 1H), 2.73 – 2.59 (m, 2H), 2.57 – 2.47 (m, 2H), 2.08 (m, 1H), 1.95 – 1.82 (m, 1H).

$^{13}\text{C NMR}$  (101 MHz, Chloroform-*d*)  $\delta$  171.18, 160.71, 158.69, 146.44, 127.07, 125.49, 125.38, 110.70, 90.35, 64.91, 55.12, 54.72, 48.45, 37.78, 28.40, 27.23.

**HRMS** (ESI)  $m/z$  Calcd for  $\text{C}_{22}\text{H}_{26}\text{NO}_4^+[\text{M}+\text{H}]^+$ : 368.1856, found: 368.1860.

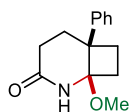

### 6a

Yellow crystal. ( $R_f$  = 0.50, PE/EA/MeOH = 2:1:0.2, v/v/v)

Compound **6a** is a previously unknown compound and was synthesized in 73% yield, dr >20:1 (33.6 mg, 0.2 mmol scale) following the **Condition [A]**. *Note: the conditions are the same as **Condition [A]**, except that the reaction temperature of 50 °C.*

$^1\text{H NMR}$  (400 MHz, Chloroform-*d*)  $\delta$  7.55 (s, 1H), 7.34 (d,  $J$  = 4.3 Hz, 4H), 7.25 – 7.22 (m, 1H), 3.12 (s, 3H), 2.56 – 2.46 (m, 2H), 2.40 – 2.31 (m, 2H), 2.30 – 2.19 (m, 2H), 2.17 – 2.09 (m, 2H).

$^{13}\text{C NMR}$  (101 MHz, Chloroform-*d*)  $\delta$  173.62, 142.92, 128.02, 127.28, 126.51, 89.20, 50.10, 49.20, 34.57, 30.37, 28.66, 27.10.

**HRMS** (ESI)  $m/z$  Calcd for  $\text{C}_{14}\text{H}_{17}\text{NNaO}_2^+[\text{M}+\text{Na}]^+$ : 254.1151, found: 254.1157.

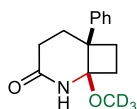

### 6a-d

Yellow crystal. ( $R_f = 0.50$ , PE/EA/MeOH = 2:1:0.2, v/v/v)

Compound **6a-d** is a previously unknown compound and was synthesized in 84% yield, dr >20:1 (39.3 mg, 0.2 mmol scale) following the **Condition [A]**. *Note: the conditions are the same as **Condition [A]**, except that the reaction temperature of 50 °C.*

$^1\text{H NMR}$  (400 MHz, Chloroform-*d*)  $\delta$  7.68 – 7.56 (m, 1H), 7.34 (d,  $J = 4.3$  Hz, 4H), 7.25 – 7.22 (m, 1H), 2.55 – 2.46 (m, 2H), 2.42 – 2.30 (m, 2H), 2.30 – 2.19 (m, 2H), 2.16 – 2.09 (m, 2H).

$^{13}\text{C NMR}$  (101 MHz, Chloroform-*d*)  $\delta$  173.70, 142.93, 128.00, 127.27, 126.48, 89.14, 49.17, 34.58, 30.32, 28.64, 27.09.

**HRMS** (ESI)  $m/z$  Calcd for  $\text{C}_{14}\text{H}_{15}\text{D}_3\text{NO}_2^+[\text{M}+\text{H}]^+$ : 235.1520, found: 235.1526.

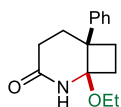

### 6b

Yellow solid. ( $R_f = 0.60$ , PE/EA/MeOH = 2:1:0.2, v/v/v)

Compound **6b** is a previously unknown compound and was synthesized in 84% yield, dr >20:1 (42.2 mg, 0.2 mmol scale) following the **Condition [A]**. *Note: the conditions are the same as **Condition [A]**, except that the reaction temperature of 50 °C.*

$^1\text{H NMR}$  (400 MHz, Chloroform-*d*)  $\delta$  7.49 – 7.36 (m, 3H), 7.33 (t,  $J = 7.7$  Hz, 2H), 7.28 – 7.20 (m, 1H), 3.35 – 3.19 (m, 2H), 2.61 – 2.46 (m, 2H), 2.40 (dt,  $J = 17.1, 5.5$  Hz, 1H), 2.35 – 2.22 (m, 2H), 2.19 (dd,  $J = 7.9, 5.1$  Hz, 2H), 2.15 – 2.06 (m, 1H), 0.94 (t,  $J = 7.0$  Hz, 3H).

$^{13}\text{C NMR}$  (101 MHz, Chloroform-*d*)  $\delta$  173.48, 142.97, 127.84, 127.31, 126.35, 88.82, 58.26, 49.25, 33.63, 31.77, 28.70, 26.65, 15.25.

**HRMS** (ESI)  $m/z$  Calcd for  $\text{C}_{15}\text{H}_{20}\text{NO}_2^+[\text{M}+\text{H}]^+$ : 246.1489, found: 246.1496.

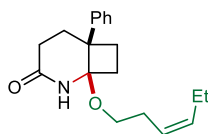

### 6c

Yellow oil. ( $R_f$  = 0.50, PE/EA/MeOH = 2:1:0.2, v/v/v)

Compound **6c** is a previously unknown compound and was synthesized in 77% yield dr >20:1 (45.1 mg, 0.2 mmol scale) following the **Condition [A]**. *Note: the conditions are the same as **Condition [A]**, except that the reaction temperature of 50 °C.*

**$^1\text{H NMR}$**  (400 MHz, Chloroform-*d*)  $\delta$  7.44 – 7.36 (m, 2H), 7.33 (t,  $J$  = 7.6 Hz, 2H), 7.26 – 7.17 (m, 2H), 5.39 – 5.31 (m, 1H), 5.14 – 5.07 (m, 1H), 3.27 – 3.15 (m, 2H), 2.60 – 2.45 (m, 2H), 2.40 (dt,  $J$  = 17.2, 5.4 Hz, 1H), 2.36 – 2.23 (m, 2H), 2.20 – 2.17 (m, 2H), 2.16 – 2.09 (m, 1H), 2.04 (p,  $J$  = 7.2 Hz, 2H), 1.86 (p,  $J$  = 7.3 Hz, 2H), 0.86 (t,  $J$  = 7.5 Hz, 3H).

**$^{13}\text{C NMR}$**  (101 MHz, Chloroform-*d*)  $\delta$  173.41, 142.91, 133.81, 127.87, 127.36, 126.39, 124.60, 88.80, 62.40, 49.34, 33.71, 31.74, 28.74, 27.76, 26.68, 20.51, 14.30.

**HRMS** (ESI)  $m/z$  Calcd for  $\text{C}_{19}\text{H}_{26}\text{NO}_2^+[\text{M}+\text{H}]^+$ : 300.1958, found: 300.1966.

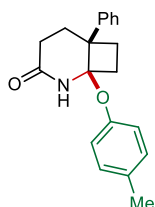

### 6d

White solid. ( $R_f$  = 0.70, PE/EA/MeOH = 2:1:0.2, v/v/v)

Compound **6d** is a previously unknown compound and was synthesized in 99% yield, dr >20:1 (60.8 mg, 0.2 mmol scale) following the **Condition [A]**.

**$^1\text{H NMR}$**  (400 MHz, Chloroform-*d*)  $\delta$  7.38 (d,  $J$  = 4.4 Hz, 4H), 7.29 (q,  $J$  = 4.4 Hz, 1H), 7.16 (s, 1H), 7.04 (d,  $J$  = 8.1 Hz, 2H), 6.65 (d,  $J$  = 8.1 Hz, 2H), 2.71 – 2.64 (m, 1H), 2.62 – 2.47 (m, 2H), 2.46 – 2.36 (m, 2H), 2.36 – 2.29 (m, 1H), 2.27 (s, 3H), 2.20 – 2.13 (m, 2H).

**$^{13}\text{C NMR}$**  (101 MHz, Chloroform-*d*)  $\delta$  172.66, 150.92, 142.66, 132.26, 130.12, 127.92, 127.36, 126.44, 119.09, 89.29, 50.02, 35.47, 31.60, 28.54, 27.17, 20.58.

**HRMS** (ESI)  $m/z$  Calcd for  $C_{20}H_{22}NO_2^+[M+H]^+$ : 308.1645, found: 308.1653.

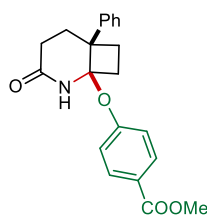

### 6e

Pink oil. ( $R_f$  = 0.65, PE/EA/MeOH = 2:1:0.2, v/v/v)

Compound **6e** is a previously unknown compound and was synthesized in 99% yield, dr >20:1 (69.5 mg, 0.2 mmol scale) following the **Condition [A]**.

**$^1H$  NMR** (400 MHz, Chloroform-*d*)  $\delta$  7.91 (d,  $J$  = 8.4 Hz, 2H), 7.71 (s, 1H), 7.39 – 7.33 (m, 4H), 7.29 – 7.27 (m, 1H), 6.71 (d,  $J$  = 8.4 Hz, 2H), 3.86 (s, 3H), 2.72 – 2.61 (m, 1H), 2.61 – 2.47 (m, 3H), 2.46 – 2.27 (m, 2H), 2.23 – 2.17 (m, 2H).

**$^{13}C$  NMR** (101 MHz, Chloroform-*d*)  $\delta$  173.22, 166.53, 157.29, 142.22, 131.52, 128.01, 127.24, 126.61, 124.00, 117.58, 89.36, 51.98, 50.10, 35.42, 31.90, 28.67, 27.44.

**HRMS** (ESI)  $m/z$  Calcd for  $C_{21}H_{22}NO_4^+[M+H]^+$ : 352.1543, found: 352.1535.

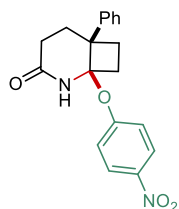

### 6f

White solid. ( $R_f$  = 0.60, PE/EA/MeOH = 2:1:0.2, v/v/v)

Compound **6f** is a previously unknown compound and was synthesized in 93% yield, dr >20:1 (67.0 mg, 0.2 mmol scale) following the **Condition [A]**.

**$^1H$  NMR** (400 MHz, Chloroform-*d*)  $\delta$  8.30 (s, 1H), 8.08 (d,  $J$  = 9.2 Hz, 2H), 7.40 – 7.33 (m, 4H), 7.30 – 7.27 (m, 1H), 6.76 (d,  $J$  = 9.2 Hz, 2H), 2.66 – 2.53 (m, 4H), 2.45 (dt,  $J$  = 16.9, 4.3 Hz, 1H), 2.38 – 2.17 (m, 3H).

**$^{13}C$  NMR** (101 MHz, Chloroform-*d*)  $\delta$  174.04, 158.82, 142.36, 141.81, 128.16, 127.17, 126.87, 125.67, 117.91, 89.71, 50.17, 35.40, 31.98, 28.90, 27.66.

**HRMS** (ESI)  $m/z$  Calcd for  $C_{19}H_{19}N_2O_4^+[M+H]^+$ : 339.1339, found: 339.1345.

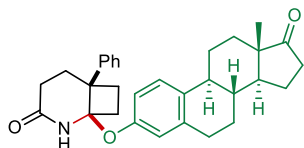

**6g**

Yellow solid. ( $R_f = 0.50$ , PE/EA/MeOH = 2:1:0.2, v/v/v)

Compound **6g** is a previously unknown compound and was synthesized in 73% yield, dr >20:1 (68.3 mg, 0.2 mmol scale) following the **Condition [A]**.

$^1\text{H NMR}$  (400 MHz, Chloroform-*d*)  $\delta$  7.39 – 7.33 (m, 4H), 7.29 – 7.27 (m, 1H), 7.14 (d,  $J = 8.5$  Hz, 1H), 6.85 (d,  $J = 6.8$  Hz, 1H), 6.53 (dd,  $J = 8.5, 2.7$  Hz, 1H), 6.47 (d,  $J = 2.6$  Hz, 1H), 2.91 – 2.79 (m, 2H), 2.75 – 2.69 (m, 1H), 2.58 – 2.44 (m, 4H), 2.40 (q,  $J = 3.7, 2.9$  Hz, 1H), 2.39 – 2.31 (m, 2H), 2.26 – 2.17 (m, 2H), 2.17 – 2.11 (m, 2H), 2.10 – 2.02 (m, 1H), 2.01 – 1.95 (m, 2H), 1.69 – 1.58 (m, 1H), 1.57 – 1.49 (m, 2H), 1.47 (d,  $J = 9.5$  Hz, 2H), 1.44 – 1.34 (m, 1H), 0.90 (s, 3H).

$^{13}\text{C NMR}$  (101 MHz, Chloroform-*d*)  $\delta$  220.82, 172.45, 151.08, 142.69, 138.36, 134.36, 128.00, 127.40, 126.67, 126.51, 118.97, 118.87, 116.15, 116.09, 89.29, 89.27, 50.50, 50.06, 48.06, 44.05, 38.29, 35.94, 35.49, 31.91, 31.65, 29.64, 28.48, 27.26, 26.50, 25.92, 21.67, 13.94.

**HRMS** (ESI)  $m/z$  Calcd for  $\text{C}_{31}\text{H}_{36}\text{NO}_3^+[\text{M}+\text{H}]^+$ : 470.2690, found: 470.2696.

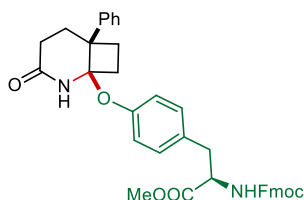

**6h**

White solid. ( $R_f = 0.50$ , PE/EA/MeOH = 2:1:0.2, v/v/v)

Compound **6h** is a previously unknown compound and was synthesized in 79% yield, dr >20:1 (97.5 mg, 0.2 mmol scale) following the **Condition [A]**.

$^1\text{H NMR}$  (400 MHz, Chloroform-*d*)  $\delta$  7.73 (d,  $J = 7.5$  Hz, 2H), 7.56 – 7.51 (m, 2H), 7.42 – 7.30 (m, 6H), 7.27 (t,  $J = 7.4$  Hz, 3H), 7.13 (d,  $J = 8.3$  Hz, 1H), 6.93 (d,  $J = 8.0$  Hz, 2H), 6.62 – 6.59 (m, 2H), 5.53 (dd,  $J = 20.2, 8.3$  Hz, 1H), 4.59 (q,  $J = 6.4$  Hz, 1H), 4.41 – 4.35 (m, 1H), 4.29 (dd,  $J = 10.7, 6.9$  Hz, 1H), 4.18 – 4.13 (m, 1H), 3.67 (s, 3H), 3.06 – 2.94 (m, 2H), 2.62 – 2.50 (m, 2H), 2.47 – 2.34 (m, 3H), 2.29 – 2.25 (m, 1H),

2.15 – 2.10 (m, 2H).

$^{13}\text{C}$  NMR (101 MHz, Chloroform-*d*)  $\delta$  172.67, 172.64, 171.96, 155.59, 152.28, 143.83, 143.78, 143.75, 142.46, 141.29, 130.49, 130.07, 127.89, 127.71, 127.28, 127.06, 126.45, 125.10, 119.97, 118.88, 118.81, 89.25, 89.21, 66.87, 54.85, 52.33, 50.01, 47.14, 37.28, 35.33, 31.59, 28.56, 27.08.

HRMS (ESI)  $m/z$  Calcd for  $\text{C}_{38}\text{H}_{37}\text{N}_2\text{O}_6^+[\text{M}+\text{H}]^+$ : 617.2646, found: 617.2648.

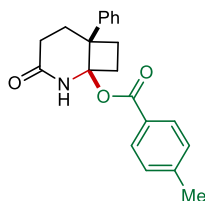

**6i**

Pink oil. ( $R_f$  = 0.30, DCM/MeOH = 50:1, v/v)

Compound **6i** is a previously unknown compound and was synthesized in 97% yield, dr >20:1 (65.1 mg, 0.2 mmol scale) following the **Condition [A]**.

$^1\text{H}$  NMR (400 MHz, Chloroform-*d*)  $\delta$  7.63 – 7.47 (m, 3H), 7.41 (t,  $J$  = 7.6 Hz, 2H), 7.35 – 7.32 (m, 3H), 7.10 (d,  $J$  = 7.9 Hz, 2H), 2.80 – 2.61 (m, 2H), 2.60 – 2.48 (m, 2H), 2.48 – 2.37 (m, 2H), 2.33 (s, 3H), 2.30 – 2.23 (m, 1H), 2.17 – 2.10 (m, 1H).

$^{13}\text{C}$  NMR (101 MHz, Chloroform-*d*)  $\delta$  171.70, 166.15, 144.44, 142.46, 129.80, 129.21, 128.09, 127.20, 126.97, 126.74, 90.31, 48.76, 35.29, 32.93, 27.99, 27.81, 21.72.

HRMS (ESI)  $m/z$  Calcd for  $\text{C}_{21}\text{H}_{21}\text{NNaO}_3^+[\text{M}+\text{Na}]^+$ : 358.1414, found: 358.1420.

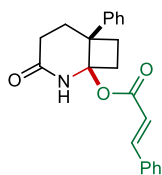

**6j**

Yellow solid. ( $R_f$  = 0.50, PE/EA/MeOH = 2:1:0.2, v/v/v)

Compound **6j** is a previously unknown compound and was synthesized in 99% yield, dr >20:1 (68.7 mg, 0.2 mmol scale) following the **Condition [A]**.

$^1\text{H}$  NMR (400 MHz, Chloroform-*d*)  $\delta$  7.43 – 7.42 (m, 2H), 7.39 (d,  $J$  = 3.1 Hz, 1H), 7.38 – 7.34 (m, 5H), 7.32 (td,  $J$  = 3.5, 1.2 Hz, 3H), 7.30 (t,  $J$  = 1.5 Hz, 1H), 6.21 (d,  $J$  = 16.0 Hz, 1H), 2.73 – 2.67 (m, 1H), 2.65 – 2.59 (m, 1H), 2.56 – 2.50 (m, 1H), 2.50 –

2.44 (m, 1H), 2.43 – 2.31 (m, 2H), 2.28 – 2.22 (m, 1H), 2.14 – 2.09 (m, 1H).

$^{13}\text{C}$  NMR (101 MHz, Chloroform-*d*)  $\delta$  171.61, 166.40, 146.52, 142.55, 133.96, 130.79, 128.98, 128.30, 128.11, 127.23, 126.68, 117.63, 90.18, 48.70, 35.34, 32.89, 27.94, 27.75.

HRMS (ESI)  $m/z$  Calcd for  $\text{C}_{22}\text{H}_{21}\text{NNaO}_3^+[\text{M}+\text{Na}]^+$ : 370.1414, found: 370.1416.

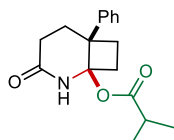

**6k**

Yellow oil. ( $R_f$  = 0.70, PE/EA/MeOH = 2:1:0.2, v/v/v)

Compound **6k** is a previously unknown compound and was synthesized in 81% yield, dr >20:1 (46.6 mg, 0.2 mmol scale) following the **Condition [A]**.

$^1\text{H}$  NMR (400 MHz, Chloroform-*d*)  $\delta$  7.36 (dd,  $J$  = 13.9, 6.1 Hz, 4H), 7.24 (t,  $J$  = 8.4 Hz, 2H), 2.72 – 2.57 (m, 1H), 2.56 – 2.43 (m, 3H), 2.43 – 2.32 (m, 3H), 2.26 – 2.19 (m, 1H), 2.16 – 2.05 (m, 1H), 0.99 (dd,  $J$  = 12.9, 7.0 Hz, 6H).

$^{13}\text{C}$  NMR (101 MHz, Chloroform-*d*)  $\delta$  176.94, 171.73, 142.34, 128.00, 127.07, 126.64, 89.91, 48.66, 35.21, 34.40, 33.01, 27.93, 27.68, 18.54, 18.40.

HRMS (ESI)  $m/z$  Calcd for  $\text{C}_{17}\text{H}_{21}\text{NNaO}_3^+[\text{M}+\text{Na}]^+$ : 310.1414, found: 310.1417.

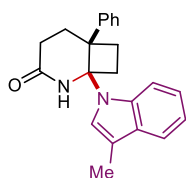

**7a**

White solid. ( $R_f$  = 0.30, PE/EA/MeOH = 2:1:0.2, v/v/v)

Compound **7a** is a previously unknown compound and was synthesized in 56% yield, dr >20:1 (38.9 mg, 0.2 mmol scale) following the **Condition [A]**.

$^1\text{H}$  NMR (400 MHz, Chloroform-*d*)  $\delta$  7.46 – 7.36 (m, 2H), 7.13 (t,  $J$  = 7.6 Hz, 1H), 7.08 (t,  $J$  = 7.4 Hz, 1H), 7.03 – 6.99 (m, 1H), 6.96 (d,  $J$  = 4.2 Hz, 4H), 6.62 (s, 1H), 6.51 (s, 1H), 3.25 – 3.12 (m, 1H), 2.86 – 2.75 (m, 2H), 2.58 – 2.50 (m, 1H), 2.50 – 2.45 (m, 1H), 2.42 – 2.38 (m, 2H), 2.05 (s, 3H), 2.01 – 1.94 (m, 1H).

$^{13}\text{C}$  NMR (101 MHz, Chloroform-*d*)  $\delta$  171.50, 140.18, 135.72, 130.65, 127.97, 126.98,

126.23, 123.19, 122.14, 119.58, 119.12, 112.58, 111.46, 76.29, 51.74, 34.19, 30.10, 28.85, 21.36, 9.39.

**HRMS** (ESI)  $m/z$  Calcd for  $C_{22}H_{23}N_2NaO^+[M+H]^+$ : 311.1805, found: 311.1811.

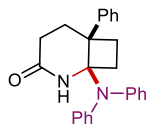

**7b**

Pink solid. ( $R_f$  = 0.65, PE/EA/MeOH = 2:1:0.2, v/v/v)

Compound **7b** is a previously unknown compound and was synthesized in 96% yield,  $dr >20:1$  (66.7 mg, 0.2 mmol scale) following the **Condition [A]**.

**$^1H$  NMR** (400 MHz, Chloroform-*d*)  $\delta$  7.50 – 7.41 (m, 2H), 7.24 – 7.21 (m, 3H), 7.11 (t,  $J$  = 7.9 Hz, 4H), 7.05 (s, 1H), 6.93 (t,  $J$  = 7.3 Hz, 2H), 6.47 (d,  $J$  = 7.6 Hz, 4H), 2.84 – 2.73 (m, 2H), 2.73 – 2.65 (m, 1H), 2.37 – 2.24 (m, 1H), 2.23 – 2.07 (m, 2H), 2.01 – 1.94 (m, 2H).

**$^{13}C$  NMR** (101 MHz, Chloroform-*d*)  $\delta$  172.46, 144.93, 141.50, 128.90, 128.10, 127.62, 127.06, 124.34, 122.87, 77.89, 50.83, 36.82, 29.02, 28.23, 21.55.

**HRMS** (ESI)  $m/z$  Calcd for  $C_{25}H_{25}N_2O^+[M+H]^+$ : 369.1961, found: 369.1965.

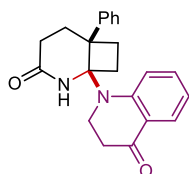

**7c**

White solid. ( $R_f$  = 0.25, PE/EA/MeOH = 2:1:0.2, v/v/v)

Compound **7c** is a previously unknown compound and was synthesized in 82% yield,  $dr >20:1$  (56.0 mg, 0.2 mmol scale) following the **Condition [A]**.

**$^1H$  NMR** (400 MHz, Chloroform-*d*)  $\delta$  7.88 (dd,  $J$  = 7.8, 1.8 Hz, 1H), 7.58 (d,  $J$  = 7.7 Hz, 2H), 7.39 – 7.33 (m, 3H), 7.30 (d,  $J$  = 7.3 Hz, 1H), 6.86 (t,  $J$  = 7.5 Hz, 1H), 6.71 (d,  $J$  = 8.4 Hz, 1H), 6.50 (s, 1H), 3.29 – 3.21 (m, 1H), 3.01 (ddd,  $J$  = 15.0, 12.1, 3.1 Hz, 1H), 2.90 – 2.72 (m, 3H), 2.67 – 2.45 (m, 3H), 2.22 – 2.05 (m, 2H), 1.90 (dt,  $J$  = 17.7, 2.7 Hz, 1H), 1.16 – 0.98 (m, 1H).

$^{13}\text{C}$  NMR (101 MHz, Chloroform-*d*)  $\delta$  193.84, 172.36, 148.94, 143.03, 134.51, 129.38, 128.23, 127.47, 127.38, 122.85, 119.49, 114.72, 78.09, 47.96, 45.14, 38.70, 37.71, 28.52, 26.80, 26.11.

HRMS (ESI)  $m/z$  Calcd for  $\text{C}_{22}\text{H}_{22}\text{N}_2\text{NaO}_2^+[\text{M}+\text{Na}]^+$ : 369.1573, found: 369.1581.

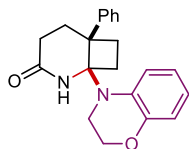

**7d**

Pale yellow oil. ( $R_f$  = 0.45, PE/EA/MeOH = 2:1:0.2, v/v/v)

Compound **7d** is a previously unknown compound and was synthesized in 99% yield, dr >20:1 (66.1 mg, 0.2 mmol scale) following the **Condition [A]**.

$^1\text{H}$  NMR (400 MHz, Chloroform-*d*)  $\delta$  7.58 (d,  $J$  = 7.8 Hz, 2H), 7.35 (t,  $J$  = 7.6 Hz, 2H), 7.28 (d,  $J$  = 7.1 Hz, 1H), 6.82 – 6.70 (m, 3H), 6.69 – 6.62 (m, 1H), 6.52 (s, 1H), 3.68 (d,  $J$  = 10.2 Hz, 1H), 3.30 (q,  $J$  = 11.2 Hz, 1H), 2.95 (t,  $J$  = 8.9 Hz, 1H), 2.82 – 2.70 (m, 3H), 2.61 – 2.55 (m, 1H), 2.51 – 2.42 (m, 2H), 2.33 (d,  $J$  = 11.9 Hz, 1H), 2.16 – 2.14 (m, 1H), 2.10 – 1.97 (m, 1H).

$^{13}\text{C}$  NMR (101 MHz, Chloroform-*d*)  $\delta$  172.42, 145.98, 143.05, 131.60, 128.00, 127.17, 127.10, 120.51, 120.15, 116.98, 114.29, 77.71, 65.51, 47.57, 40.80, 38.20, 28.59, 27.12, 26.50.

HRMS (ESI)  $m/z$  Calcd for  $\text{C}_{21}\text{H}_{23}\text{N}_2\text{O}_2^+[\text{M}+\text{H}]^+$ : 335.1754, found: 335.1762.

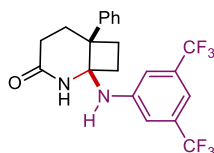

**7e**

White solid. ( $R_f$  = 0.60, PE/EA/MeOH = 2:1:0.2, v/v/v)

Compound **7e** is a previously unknown compound and was synthesized in 99% yield, dr >20:1 (84.7 mg, 0.2 mmol scale) following the **Condition [A]**.

$^1\text{H}$  NMR (400 MHz, Chloroform-*d*)  $\delta$  7.76 (s, 1H), 7.46 (t,  $J$  = 7.5 Hz, 2H), 7.36 (t,  $J$  = 7.3 Hz, 1H), 7.30 – 7.17 (m, 3H), 6.81 (s, 2H), 4.80 (s, 1H), 2.70 – 2.59 (m, 1H), 2.58 – 2.44 (m, 4H), 2.41 – 2.34 (m, 1H), 2.24 – 2.15 (m, 1H), 2.14 – 2.05 (m, 1H).

$^{13}\text{C}$  NMR (101 MHz, Chloroform-*d*)  $\delta$  172.90, 142.74, 141.47, 132.50 (q,  $J = 33.1$  Hz), 129.38, 127.73, 126.48, 123.42 (q,  $J = 273.7$  Hz), 114.19 (q,  $J = 3.6$  Hz), 111.83, 111.79, 111.75, 70.26, 49.78, 34.83, 32.22, 28.92, 25.79.

$^{19}\text{F}$  NMR (376 MHz, Chloroform-*d*)  $\delta$  -63.12.

HRMS (ESI)  $m/z$  Calcd for:  $\text{C}_{21}\text{H}_{19}\text{F}_6\text{N}_2\text{O}^+[\text{M}+\text{H}]^+$ : 429.1396, found: 429.1395.

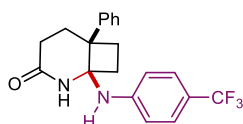

**7f**

White solid. ( $R_f = 0.60$ , PE/EA/MeOH = 2:1:0.2, v/v/v)

Compound **7f** is a previously unknown compound and was synthesized in 97% yield, dr >20:1 (69.9 mg, 0.2 mmol scale) following the **Condition [A]**.

$^1\text{H}$  NMR (400 MHz, Chloroform-*d*)  $\delta$  7.45 (t,  $J = 7.5$  Hz, 2H), 7.39 – 7.34 (m, 3H), 7.22 (d,  $J = 7.6$  Hz, 2H), 6.79 (s, 1H), 6.46 (d,  $J = 8.3$  Hz, 2H), 4.63 (s, 1H), 2.76 – 2.63 (m, 1H), 2.62 – 2.52 (m, 2H), 2.52 – 2.45 (m, 2H), 2.43 – 2.36 (m, 1H), 2.20 – 2.14 (m, 1H), 2.13 – 2.05 (m, 1H).

$^{13}\text{C}$  NMR (101 MHz, Chloroform-*d*)  $\delta$  172.23, 145.30, 141.56, 129.33, 127.62, 126.87 (q,  $J = 3.8$  Hz), 126.45, 124.66 (q,  $J = 271.0$  Hz), 120.58 (q,  $J = 32.3$  Hz), 113.84, 70.17, 49.57, 34.98, 32.49, 28.98, 25.91.

$^{19}\text{F}$  NMR (376 MHz, Chloroform-*d*)  $\delta$  -61.32.

HRMS (ESI)  $m/z$  Calcd for  $\text{C}_{20}\text{H}_{20}\text{F}_3\text{N}_2\text{O}^+[\text{M}+\text{H}]^+$ : 361.1522, found: 361.1519.

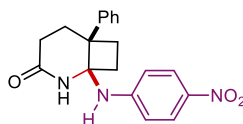

**7g**

Yellow solid. ( $R_f = 0.30$ , PE/EA/MeOH = 2:1:0.2, v/v/v)

Compound **7g** is a previously unknown compound and was synthesized in 97% yield, dr >20:1 (65.5 mg, 0.2 mmol scale) following the **Condition [A]**.

$^1\text{H}$  NMR (400 MHz, Chloroform-*d*)  $\delta$  8.00 (d,  $J = 9.1$  Hz, 2H), 7.43 (t,  $J = 7.5$  Hz, 2H), 7.37 – 7.30 (m, 1H), 7.24 – 7.17 (m, 2H), 7.11 (s, 1H), 6.41 (d,  $J = 9.2$  Hz, 2H), 5.07

(s, 1H), 2.71 – 2.60 (m, 1H), 2.59 – 2.44 (m, 4H), 2.41 – 2.34 (m, 1H), 2.24 – 2.14 (m, 1H), 2.13 – 2.03 (m, 1H).

$^{13}\text{C}$  NMR (101 MHz, Chloroform-*d*)  $\delta$  172.32, 148.31, 141.02, 139.27, 129.33, 127.72, 126.39, 126.04, 113.37, 70.07, 49.56, 34.64, 32.59, 28.84, 25.75.

HRMS (ESI)  $m/z$  Calcd for  $\text{C}_{19}\text{H}_{20}\text{N}_3\text{O}_3^+[\text{M}+\text{H}]^+$ : 338.1499, found: 338.1496.

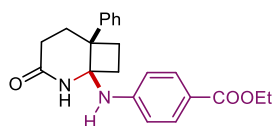

**7h**

Colorless oil. ( $R_f$  = 0.45, PE/EA/MeOH = 2:1:0.2, v/v/v)

Compound **7h** is a previously unknown compound and was synthesized in 97% yield,  $dr >20:1$  (70.7 mg, 0.2 mmol scale) following the **Condition [A]**.

$^1\text{H}$  NMR (400 MHz, Chloroform-*d*)  $\delta$  7.81 (dd,  $J$  = 8.6, 3.1 Hz, 2H), 7.44 – 7.39 (m, 2H), 7.34 – 7.29 (m, 1H), 7.20 – 7.17 (m, 2H), 6.93 – 6.79 (m, 1H), 6.38 (dd,  $J$  = 8.7, 2.7 Hz, 2H), 4.70 (s, 1H), 4.29 – 4.23 (m, 2H), 2.69 – 2.61 (m, 1H), 2.59 – 2.42 (m, 4H), 2.42 – 2.27 (m, 1H), 2.20 – 1.99 (m, 2H), 1.31 (td,  $J$  = 7.1, 3.5 Hz, 3H).

$^{13}\text{C}$  NMR (101 MHz, Chloroform-*d*)  $\delta$  172.10, 166.38, 146.40, 141.43, 131.46, 129.19, 127.48, 126.37, 120.43, 113.36, 70.04, 60.37, 49.43, 34.83, 32.46, 28.84, 25.81, 14.37.

HRMS (ESI)  $m/z$  Calcd for  $\text{C}_{22}\text{H}_{25}\text{N}_2\text{O}_3^+[\text{M}+\text{H}]^+$ : 365.1860, found: 365.1867.

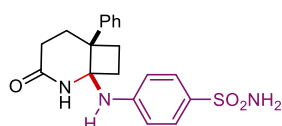

**7i**

Brown solid. ( $R_f$  = 0.15, PE/EA/MeOH = 2:1:0.2, v/v/v)

Compound **7i** is a previously unknown compound and was synthesized in 82% yield,  $dr >20:1$  (61.0 mg, 0.2 mmol scale) following the **Condition [A]**.

$^1\text{H}$  NMR (400 MHz, Methanol-*d*<sub>4</sub>)  $\delta$  7.55 – 7.51 (m, 2H), 7.45 – 7.36 (m, 2H), 7.35 – 7.26 (m, 2H), 7.25 – 7.16 (m, 1H), 6.49 (d,  $J$  = 8.9 Hz, 2H), 2.78 – 2.69 (m, 1H), 2.69 – 2.56 (m, 2H), 2.52 – 2.32 (m, 3H), 2.27 – 2.17 (m, 2H).

$^{13}\text{C}$  NMR (101 MHz, Methanol- $d_4$ )  $\delta$  175.86, 148.57, 143.14, 132.85, 129.43, 128.36, 128.13, 128.01, 115.12, 72.70, 50.99, 35.23, 32.89, 29.93, 25.63.

HRMS (ESI)  $m/z$  Calcd for  $\text{C}_{19}\text{H}_{22}\text{N}_3\text{O}_3\text{S}^+[\text{M}+\text{H}]^+$ : 372.1376, found: 372.1383.

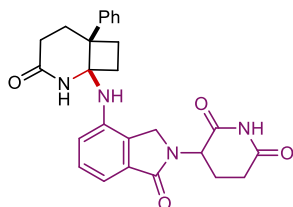

### 7j

White solid. ( $R_f$  = 0.10, PE/EA/MeOH = 2:1:0.2, v/v/v)

Compound **7j** is a previously unknown compound and was synthesized in 88% yield, dr = 2:1 (81.1mg 0.2 mmol scale) following the **Condition [A]**.

$^1\text{H}$  NMR (400 MHz, Chloroform- $d$ )  $\delta$  10.06 (d,  $J$  = 4.8 Hz, 0.95H), 9.69 (d,  $J$  = 9.5 Hz, 0.51H), 7.67 (s, 0.95H), 7.42 (q,  $J$  = 7.2 Hz, 2.61H), 7.39 – 7.31 (m, 2.43H), 7.29 – 7.14 (m, 5.14H), 7.08 (d,  $J$  = 7.5 Hz, 1.05H), 6.68 (dd,  $J$  = 12.5, 7.9 Hz, 1.47H), 5.10 – 4.99 (m, 1.47H), 4.14 (s, 0.50H), 4.00 (s, 1H), 3.65 – 3.61 (m, 2.27H), 3.37 (d,  $J$  = 15.6 Hz, 1.16H), 2.77 – 2.73 (m, 2.95H), 2.66 (d,  $J$  = 12.4 Hz, 1.64H), 2.60 (t,  $J$  = 6.7 Hz, 2.86H), 2.52 – 2.41 (m, 3.32H), 2.36 – 2.27 (m, 1.68H), 2.23 – 2.08 (m, 3.48H), 2.08 – 1.91 (m, 2.71H).

$^{13}\text{C}$  NMR (101 MHz, Chloroform- $d$ )  $\delta$  173.15, 172.86, 172.11, 170.68, 170.34, 169.58, 169.44, 141.70, 141.53, 137.62, 137.24, 132.51, 132.29, 129.18, 129.06, 128.91, 128.08, 127.83, 127.44, 127.36, 126.48, 126.42, 115.78, 115.43, 114.18, 70.33, 70.07, 51.73, 51.54, 49.74, 49.56, 44.35, 43.98, 34.18, 33.92, 32.82, 32.39, 31.51, 29.12, 28.95, 25.40, 25.11, 23.13.

HRMS (ESI)  $m/z$  Calcd for  $\text{C}_{26}\text{H}_{27}\text{N}_4\text{O}_4^+[\text{M}+\text{H}]^+$ : 459.2027, found: 459.2033.

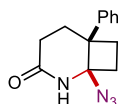

### 7k

Yellow solid. ( $R_f$  = 0.25, DCM/MeOH = 50:1, v/v)

Compound **7k** is a previously unknown compound and was synthesized in 95% yield, dr >20:1 (46.0 mg, 0.2 mmol scale) following the **Condition [A]**.

**<sup>1</sup>H NMR** (400 MHz, Chloroform-*d*) δ 7.88 (s, 1H), 7.40 (t, *J* = 7.5 Hz, 2H), 7.33 – 7.24 (m, 3H), 2.68 – 2.46 (m, 4H), 2.45 – 2.32 (m, 2H), 2.28 – 2.22 (m, 1H), 2.13 – 2.07 (m, 1H).

**<sup>13</sup>C NMR** (101 MHz, Chloroform-*d*) δ 173.17, 142.46, 128.28, 126.86, 126.59, 77.56, 50.17, 34.94, 32.40, 27.78, 26.69.

**HRMS** (ESI) *m/z* Calcd for C<sub>13</sub>H<sub>15</sub>N<sub>4</sub>O<sup>+</sup>[M+H]<sup>+</sup>: 243.1240, found: 243.1246.

## 5. Transformations of $\delta$ -lactams

### 5.1 Gram-scale synthesis of **3a**

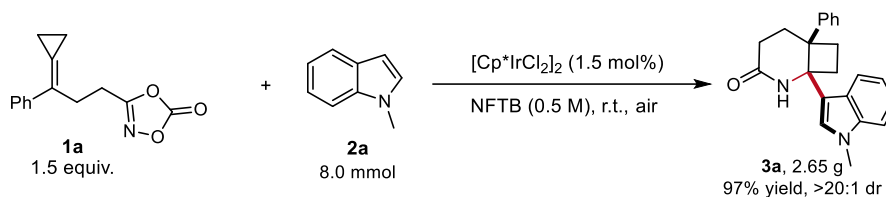

**Supplementary Figure 6.** Gram-scale synthesis of **3a**

To a 25 mL round-bottom flask equipped with a rod-like-shaped Teflon stir bar were added  $[\text{Cp}^*\text{IrCl}_2]_2$  catalyst (95.6 mg, 0.15 mmol, 1.5 mol%), **2a** (8.0 mmol), NFTB (8 mL, 1.0 M) at 25 °C, dioxazolone substrate **1a** (2.92 g, 12.0 mmol, 1.5 equiv.) was added under air atmosphere. The reaction mixture was slowly stirred (200 rpm) in a metal heating plate at 25 °C for 5 h. Water was added and the mixture was extracted with ethyl acetate (EA). The combined organic layer was washed with water and brine, dried over anhydrous  $\text{Na}_2\text{SO}_4$ , and concentrated in vacuo. The resulting residue was purified by silica gel flash chromatography using PE/EA/MeOH eluent (3:1:0 to 2:1:0.2, v/v/v) to give the  $\delta$ -lactam **3a** product.

### 5.2 Access to *N*-methylated product

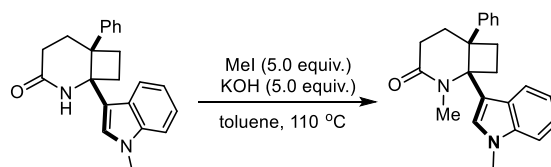

**Supplementary Figure 7.** *N*-methylation reaction of **3a**

To a solution of compound **3a** (66.1 mg, 0.2 mmol, 1.0 equiv.) in toluene (1 mL) in a 10 mL seal tube, MeI (65  $\mu\text{L}$ , 1.0 mmol, 5.0 equiv.) and KOH (56.1 mg, 1.0 mmol, 5.0 equiv.) were added successively. The tube was sealed and heated to 110 °C for 12 hours. After being cooled to room temperature, the mixture was diluted with ethyl acetate (10 mL) and water (10 mL). The organic layer was separated, washed with brine, dried over anhydrous  $\text{Na}_2\text{SO}_4$  and concentrated in vacuo. The resulting residue was purified by silica gel flash chromatography using PE/EA/MeOH eluent (3:1:0 to 2:1:0.2, v/v/v) to give the target product.

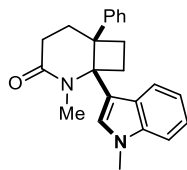

**8a**

Pale yellow solid. ( $R_f = 0.5$ , PE/EA/MeOH = 2:1:0.2, v/v/v)

Compound **8a** is a previously unknown compound and was synthesized in 97% yield, dr >20:1 (66.8 mg, 0.2 mmol scale) following the general procedure.

$^1\text{H NMR}$  (400 MHz, Chloroform-*d*)  $\delta$  7.53 (d,  $J = 7.6$  Hz, 1H), 7.17 – 7.12 (m, 3H), 6.99 – 6.96 (m, 2H), 6.93 – 6.83 (m, 3H), 6.75 (s, 1H), 3.53 (s, 3H), 2.83 – 2.74 (m, 4H), 2.69 – 2.50 (m, 4H), 2.46 – 2.39 (m, 2H), 2.13 (dt,  $J = 13.6, 4.5$  Hz, 1H).

$^{13}\text{C NMR}$  (101 MHz, Chloroform-*d*)  $\delta$  171.35, 145.33, 136.95, 127.28, 127.19, 126.45, 125.61, 121.49, 120.38, 120.09, 115.30, 109.35, 67.22, 51.28, 34.83, 32.70, 32.52, 30.01, 28.95, 26.78.

**HRMS** (ESI)  $m/z$  Calcd for  $\text{C}_{23}\text{H}_{24}\text{N}_2\text{NaO}^+[\text{M}+\text{Na}]^+$ : 367.1781, found: 367.1784.

### 5.3 Access to piperidine

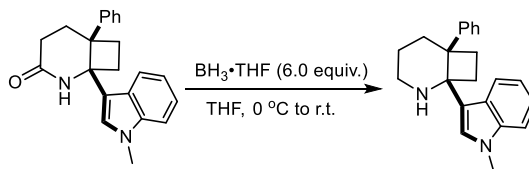

**Supplementary Figure 8.** Reduction reaction of **3a**

To a solution of compound **3a** (66.1 mg, 0.2 mmol, 1.0 equiv.) in dry THF (3 mL) in a 10 mL seal tube, a solution of 1.2 mL of  $\text{BH}_3 \cdot \text{THF}$  complex was slowly added with cooling by ice and then stirred for 1 hours with cooling by ice and for 12 hours at room temperature. Then, methanol was slowly added the reaction solution and heated to 70 °C for 5 hours. After being cooled to room temperature, the mixture was diluted with ethyl acetate (10 mL) and water (10 mL). The organic layer was separated, washed with brine, dried over anhydrous  $\text{Na}_2\text{SO}_4$  and concentrated in vacuo. The resulting residue was purified by silica gel flash chromatography using PE/EA/MeOH eluent (3:1:0 to 2:1:0.2, v/v/v) to give the target product.

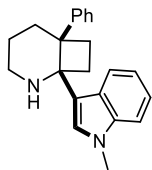

**8b**

Pale yellow solid. ( $R_f = 0.25$ , PE/EA/MeOH = 2:1:0.2, v/v/v)

Compound **8b** is a previously unknown compound and was synthesized in 62% yield, dr >20:1 (39.0 mg, 0.2 mmol scale) following the general procedure.

$^1\text{H NMR}$  (400 MHz, Chloroform-*d*)  $\delta$  7.82 (d,  $J = 8.1$  Hz, 1H), 7.29 (d,  $J = 7.2$  Hz, 2H), 7.18 (t,  $J = 7.3$  Hz, 2H), 7.16 – 7.07 (m, 3H), 6.97 (ddd,  $J = 8.0, 6.3, 1.6$  Hz, 1H), 5.99 (s, 1H), 3.47 (s, 3H), 3.34 – 3.15 (m, 2H), 2.99 (q,  $J = 10.0$  Hz, 1H), 2.30 – 2.20 (m, 2H), 2.17 – 2.02 (m, 2H), 1.92 – 1.79 (m, 2H), 1.62 – 1.56 (m, 1H).

$^{13}\text{C NMR}$  (101 MHz, Chloroform-*d*)  $\delta$  148.57, 136.92, 127.72, 127.34, 127.14, 126.60, 125.53, 122.12, 121.27, 118.37, 109.01, 61.80, 48.14, 42.02, 38.68, 32.66, 28.40, 27.11, 22.37.

HRMS (ESI)  $m/z$  Calcd for  $\text{C}_{22}\text{H}_{25}\text{N}_2^+[\text{M}+\text{H}]^+$ : 317.2012, found: 317.2017.

#### 5.4 Access to thioamide

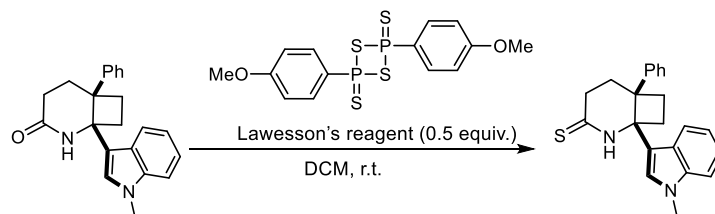

**Supplementary Figure 9.** Oxygen-sulfur exchange reaction of **3a**

To a reaction vial was added **3a** (66.1 mg, 0.2 mmol), Lawesson's reagent (40.4 mg, 0.1 mmol) and anhydrous DCM (1.0 mL) was added under air atmosphere, and the reaction was stirred at room temperature for 12 h. The crude material was poured into deionized water, extracted with EA for three times, and dried under reduced pressure. The residue was purified by flash chromatography (PE/EA) to afford the desired product.

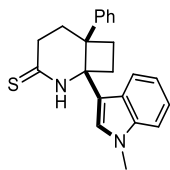

**8c**

White solid. ( $R_f$  = 0.80, PE/EA/MeOH = 2:1:0.2, v/v/v)

Compound **8c** is a previously unknown compound and was synthesized in 97% yield, dr >20:1 (67.2 mg, 0.2 mmol scale) following the general procedure.

$^1\text{H NMR}$  (400 MHz, Chloroform-*d*)  $\delta$  8.76 (s, 1H), 7.63 (d,  $J$  = 8.0 Hz, 1H), 7.17 (d,  $J$  = 4.0 Hz, 2H), 7.14 – 7.09 (m, 1H), 7.07 – 7.01 (m, 2H), 7.01 – 6.92 (m, 3H), 6.66 (s, 1H), 3.57 (s, 3H), 3.29 – 3.12 (m, 2H), 2.80 – 2.71 (m, 1H), 2.70 – 2.56 (m, 2H), 2.42 – 2.33 (m, 1H), 2.32 – 2.24 (m, 1H), 2.21 – 2.14 (m, 1H).

$^{13}\text{C NMR}$  (101 MHz, Chloroform-*d*)  $\delta$  202.89, 144.18, 137.19, 127.58, 127.30, 126.46, 126.16, 126.10, 121.92, 120.20, 120.07, 114.65, 109.61, 64.64, 49.64, 36.92, 34.46, 34.40, 32.87, 25.85.

**HRMS** (ESI)  $m/z$  Calcd for  $\text{C}_{22}\text{H}_{23}\text{N}_2\text{S}^+[\text{M}+\text{H}]^+$ : 347.1576, found: 347.1582.

### 5.5 Access to Boc-protected $\delta$ -amino acid

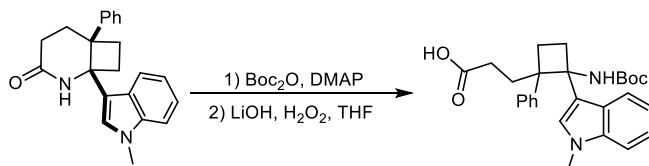

**Supplementary Figure 10.** Hydrolysis of **3a**

To a solution of compound **3a** (132.17 mg, 0.4 mmol, 1.0 equiv.) in dry THF (10 mL) was added 4-dimethylaminopyridine (48.9 mg, 0.4 mmol, 1.0 equiv.) and Boc anhydride (1.0 mmol, 2.5 equiv.). The mixture was stirred at room temperature for 48 hours then concentrated in vacuo. Purification of the crude mixture by flash silica gel chromatography gave the Boc-protected amide in 85% yield.

A solution of Boc-protected amide in THF (5 mL) was cooled to 0 °C, then 30% hydrogen peroxide (1.0 mmol, 5.0 equiv.) and lithium hydroxide monohydrate (1.0 mmol, 5 equiv.) were added. The reaction mixture was stirred at 0 °C for 2.5 hours then quenched with 1.5 M aqueous sodium thiosulfate (1.2 mL) at 0 °C. The organic solvent

was removed under reduced pressure, and the residue was washed with dichloromethane (10 mL) twice. Then the aqueous phase was acidified to pH = 2 with 10% aqueous hydrochloric acid and extracted with ethyl acetate (10 mL) twice. The organic phase was dried over sodium sulfate and concentrated in vacuo. The resulting residue was purified by flash silica gel chromatography using PE/EA/MeOH eluent (3:1:0 to 2:1:0.2, v/v/v) to give compound **8d**.

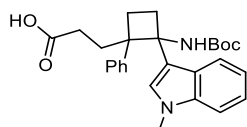

**8d**

Green solid. ( $R_f$  = 0.60, PE/EA/MeOH = 2:1:0.2, v/v/v)

Compound **8d** is a previously unknown compound and was synthesized in 60% yield (54.5 mg, 0.2 mmol scale) following the general procedure.

**$^1\text{H}$  NMR** (400 MHz, Chloroform-*d*)  $\delta$  8.14 (s, 1H), 7.72 (d,  $J$  = 8.0 Hz, 1H), 7.16 (d,  $J$  = 7.4 Hz, 2H), 7.04 (d,  $J$  = 4.2 Hz, 4H), 6.96 – 6.93 (m, 2H), 6.24 (s, 1H), 3.46 (s, 3H), 2.81 – 2.46 (m, 5H), 2.29 – 2.22 (m, 1H), 2.10 – 2.03 (m, 1H), 1.79 – 1.72 (m, 1H), 0.88 (s, 9H).

**$^{13}\text{C}$  NMR** (101 MHz, Chloroform-*d*)  $\delta$  178.51, 158.26, 143.33, 136.85, 127.50, 127.20, 127.06, 126.27, 125.93, 121.36, 120.94, 118.65, 108.57, 80.62, 62.38, 55.69, 33.62, 33.38, 32.53, 30.26, 27.91, 23.56.

**HRMS** (ESI)  $m/z$  Calcd for  $\text{C}_{27}\text{H}_{32}\text{N}_2\text{NaO}_4^+[\text{M}+\text{Na}]^+$ : 471.2254, found: 471.2255.

### 5.6 Access to 6-phenyl-2-azabicyclo[4.2.0]octan-3-one

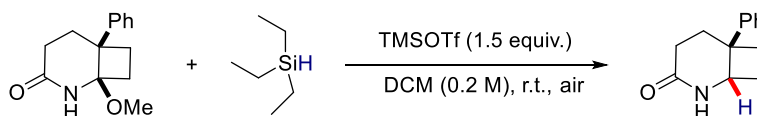

**Supplementary Figure 11.** Reduction reaction of **6a**

To an oven-dried screwed 4 mL glass vial equipped with a rod-like-shaped Teflon stir bar were added **6a** (46.3 mg, 0.2 mmol), triethylsilane (0.5 mmol, 2.5 equiv.), DCM (1 mL, 0.2 M), and TMSOTf (0.3 mmol, 1.5 equiv.) under air atmosphere. The vial was then sealed. The reaction mixture was slowly stirred (200 rpm) in a metal heating plate at 25 °C overnight. Upon completion of the reaction, the mixture was diluted with DCM

and quenched with sat. aq. NaHCO<sub>3</sub>. The organic layer was separated, and the aqueous layer was extracted three more times with DCM. The combined organic layers were then dried with Na<sub>2</sub>SO<sub>4</sub>, filtered, and concentrated under reduced pressure. The resulting residue was purified by silica gel flash chromatography using PE/EA/MeOH eluent (2:1:0.2, v/v/v) to give the **8e**.

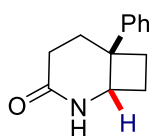

**8e**

White solid. (*R<sub>f</sub>* = 0.30, PE/EA/MeOH = 2:1:0.2, v/v/v)

Compound **8e** is a previously unknown compound and was synthesized in 99% yield (43.2 mg, 0.2 mmol scale) following the general procedure.

<sup>1</sup>H NMR (400 MHz, Chloroform-*d*) δ 7.36 – 7.32 (m, 2H), 7.26 – 7.18 (m, 2H), 7.18 – 7.12 (m, 2H), 4.16 (td, *J* = 7.3, 2.9 Hz, 1H), 2.43 (td, *J* = 12.9, 4.1 Hz, 1H), 2.37 – 2.25 (m, 2H), 2.24 – 2.13 (m, 2H), 2.13 – 2.03 (m, 2H), 1.97 (dt, *J* = 13.3, 4.3 Hz, 1H).

<sup>13</sup>C NMR (101 MHz, Chloroform-*d*) δ 173.51, 148.14, 128.56, 126.41, 125.26, 52.99, 44.40, 32.94, 28.43, 28.09, 27.70.

HRMS (ESI) *m/z* Calcd for C<sub>13</sub>H<sub>16</sub>NO<sup>+</sup>[M+H]<sup>+</sup>: 202.1226, found: 202.1226.

### 5.7 Access to 3-oxo-6-phenyl-2-azabicyclo[4.2.0]octane-1-carbonitrile

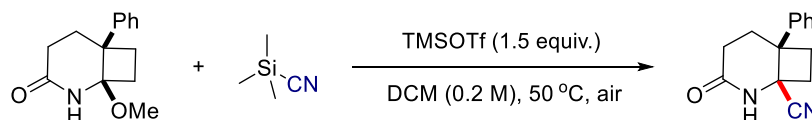

**Supplementary Figure 12.** Derivatization of **6a**

To an oven-dried screwed 4 mL glass vial equipped with a rod-like-shaped Teflon stir bar were added **6a** (46.3 mg, 0.2 mmol, 1.0 equiv.), TMSCN (0.5 mmol, 2.5 equiv.), DCM (1 mL, 0.2 M), and TMSOTf (0.3 mmol, 1.5 equiv.) under air atmosphere. The vial was then sealed. The reaction mixture was slowly stirred (200 rpm) in a metal heating plate at 50 °C overnight. Upon completion of the reaction, the mixture was diluted with DCM and quenched with sat. aq. NaHCO<sub>3</sub>. The organic layer was separated, and the aqueous layer was extracted three more times with DCM. The combined organic layers were then dried with Na<sub>2</sub>SO<sub>4</sub>, filtered, and concentrated under

reduced pressure. The resulting residue was purified by silica gel flash chromatography using PE/EA/MeOH eluent (2:1:0.2, v/v/v) to give the **8f**.

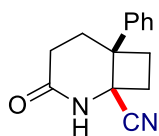

**8f**

White solid. ( $R_f$  = 0.30, PE/EA/MeOH = 2:1:0.2, v/v/v)

Compound **8f** is a previously unknown compound and was synthesized in 83% yield, dr >20:1 (38.6 mg, 0.2 mmol scale) following the general procedure.

$^1\text{H NMR}$  (400 MHz, Chloroform-*d*)  $\delta$  7.54 (s, 1H), 7.40 (t,  $J$  = 7.5 Hz, 2H), 7.31 (t,  $J$  = 7.3 Hz, 1H), 7.24 – 7.12 (m, 2H), 2.84 – 2.69 (m, 1H), 2.64 – 2.47 (m, 3H), 2.46 – 2.24 (m, 3H), 2.12 – 1.99 (m, 1H).

$^{13}\text{C NMR}$  (101 MHz, Chloroform-*d*)  $\delta$  171.88, 143.37, 128.79, 127.60, 125.50, 119.63, 55.81, 48.03, 34.31, 33.79, 27.30, 27.12.

**HRMS** (ESI)  $m/z$  Calcd for  $\text{C}_{14}\text{H}_{15}\text{N}_2\text{O}^+[\text{M}+\text{H}]^+$ : 227.1179, found: 227.1188.

### 5.8 Access to 6-phenyl-1-(phenylthio)-2-azabicyclo[4.2.0]octan-3-one

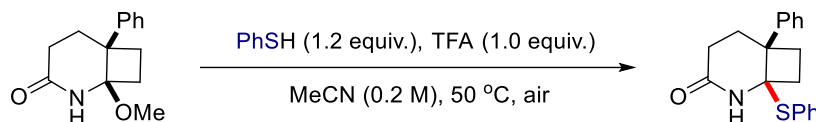

**Supplementary Figure 13.** Derivatization of **6a**

To an oven-dried screwed 4 mL glass vial equipped with a rod-like-shaped Teflon stir bar were added **6a** (69.4 mg, 0.3 mmol, 1.0 equiv.), thiophenol (0.36 mmol, 1.2equiv.),  $\text{CH}_3\text{CN}$  (600  $\mu\text{L}$ , 0.5 M), and TFA (0.3 mmol, 1.5 equiv.) under air atmosphere. The vial was then sealed. The reaction mixture was slowly stirred (200 rpm) in a metal heating plate at 25 °C overnight. Upon completion of the reaction, the mixture was diluted with DCM and quenched with sat. aq.  $\text{NaHCO}_3$ . The organic layer was separated, and the aqueous layer was extracted three more times with DCM. The combined organic layers were then dried with  $\text{NaSO}_4$ , filtered, and concentrated under reduced pressure. The resulting residue was purified by silica gel flash chromatography using PE/EA/MeOH eluent (2:1:0.2, v/v/v) to give the **8g**.

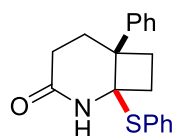

**8g**

White solid. ( $R_f$  = 0.50, PE/EA/MeOH = 2:1:0.2, v/v/v)

Compound **8g** is a previously unknown compound and was synthesized in 89% yield, dr >20:1 (87.8 mg, 0.3 mmol scale) following the general procedure.

$^1\text{H NMR}$  (400 MHz, Chloroform-*d*)  $\delta$  7.46 (dd,  $J$  = 7.3, 2.0 Hz, 2H), 7.40 – 7.34 (m, 5H), 7.33 – 7.24 (m, 3H), 6.33 (s, 1H), 2.72 – 2.43 (m, 4H), 2.42 – 2.26 (m, 2H), 2.22 – 2.16 (m, 1H), 2.02 (dt,  $J$  = 13.3, 3.9 Hz, 1H).

$^{13}\text{C NMR}$  (101 MHz, Chloroform-*d*)  $\delta$  171.18, 143.34, 135.85, 131.19, 129.58, 129.32, 128.13, 127.12, 126.60, 69.26, 49.04, 34.81, 34.77, 27.89, 27.19.

**HRMS** (ESI)  $m/z$  Calcd for  $\text{C}_{19}\text{H}_{20}\text{NOS}^+[\text{M}+\text{H}]^+$ : 310.1260, found: 310.1265.

## 6. X-ray crystallographic data

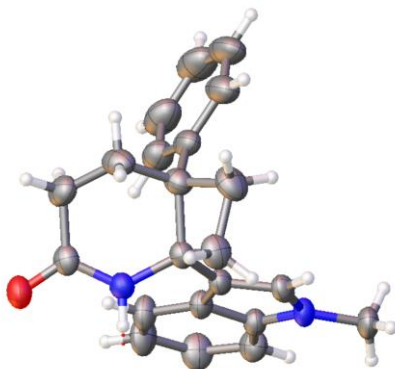

Supplementary Figure 14. X-ray structure of compound **3a**

Single crystals for X-ray studies were grown by slow evaporation of a solution of compound **3a** in a mixture of DCM/heptane in 4 mL tube at room temperature. The X-ray data of **3a** is deposited in the Cambridge Crystallographic Data Centre with a number of CCDC 2518236.

### Supplementary Table 2. Crystal data and structure refinement for **3a**

|                                     |                                                               |
|-------------------------------------|---------------------------------------------------------------|
| Identification code                 | 37-MR-20250417A_auto                                          |
| Empirical formula                   | C <sub>22</sub> H <sub>22</sub> N <sub>2</sub> O              |
| Formula weight                      | 330.41                                                        |
| Temperature/K                       | 289(9)                                                        |
| Crystal system                      | monoclinic                                                    |
| Space group                         | P2 <sub>1</sub> /n                                            |
| a/Å                                 | 8.6158(3)                                                     |
| b/Å                                 | 17.4664(6)                                                    |
| c/Å                                 | 23.9834(9)                                                    |
| α/°                                 | 90                                                            |
| β/°                                 | 92.064(3)                                                     |
| γ/°                                 | 90                                                            |
| Volume/Å <sup>3</sup>               | 3606.8(2)                                                     |
| Z                                   | 8                                                             |
| ρ <sub>calc</sub> g/cm <sup>3</sup> | 1.217                                                         |
| μ/mm <sup>-1</sup>                  | 0.075                                                         |
| F(000)                              | 1408.0                                                        |
| Crystal size/mm <sup>3</sup>        | 0.23 × 0.2 × 0.14                                             |
| Radiation                           | Mo Kα (λ = 0.71073)                                           |
| 2θ range for data collection/°      | 4.964 to 50.698                                               |
| Index ranges                        | -10 ≤ h ≤ 9, -21 ≤ k ≤ 21, -28 ≤ l ≤ 28                       |
| Reflections collected               | 26972                                                         |
| Independent reflections             | 6595 [R <sub>int</sub> = 0.0302, R <sub>sigma</sub> = 0.0254] |

|                                                |                                  |
|------------------------------------------------|----------------------------------|
| Data/restraints/parameters                     | 6595/0/453                       |
| Goodness-of-fit on $F^2$                       | 1.034                            |
| Final R indexes [ $I > 2\sigma(I)$ ]           | $R_1 = 0.0697$ , $wR_2 = 0.1895$ |
| Final R indexes [all data]                     | $R_1 = 0.0933$ , $wR_2 = 0.2051$ |
| Largest diff. peak/hole / $e \text{ \AA}^{-3}$ | 0.73/-0.19                       |

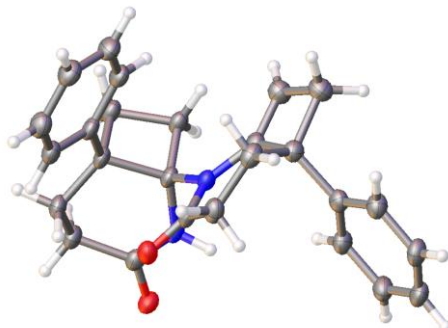

**Supplementary Figure 15.** X-ray structure of compound **4a**

Single crystals for X-ray studies were grown by slow evaporation of a solution of compound **4a** in a mixture of  $\text{CHCl}_3$ /heptane in 4 mL tube at room temperature. The X-ray data of **4a** is deposited in the Cambridge Crystallographic Data Centre with a number of CCDC 2518237.

**Supplementary Table 3.** Crystal data and structure refinement for **4a**.

|                                     |                                                                     |
|-------------------------------------|---------------------------------------------------------------------|
| Identification code                 | 38-CR-20250904C_auto                                                |
| Empirical formula                   | $\text{C}_{26.5}\text{H}_{26.5}\text{Cl}_{1.5}\text{N}_2\text{O}_2$ |
| Formula weight                      | 458.17                                                              |
| Temperature/K                       | 100.00(10)                                                          |
| Crystal system                      | monoclinic                                                          |
| Space group                         | $C2/c$                                                              |
| $a/\text{\AA}$                      | 31.6097(7)                                                          |
| $b/\text{\AA}$                      | 9.6001(2)                                                           |
| $c/\text{\AA}$                      | 30.3578(6)                                                          |
| $\alpha/^\circ$                     | 90                                                                  |
| $\beta/^\circ$                      | 107.260(2)                                                          |
| $\gamma/^\circ$                     | 90                                                                  |
| Volume/ $\text{\AA}^3$              | 8797.4(3)                                                           |
| Z                                   | 16                                                                  |
| $\rho_{\text{calc}} \text{ g/cm}^3$ | 1.384                                                               |
| $\mu/\text{mm}^{-1}$                | 2.312                                                               |
| $F(000)$                            | 3856.0                                                              |
| Crystal size/ $\text{mm}^3$         | $0.2 \times 0.18 \times 0.14$                                       |
| Radiation                           | $\text{Cu K}\alpha$ ( $\lambda = 1.54184$ )                         |

|                                                  |                                                                   |
|--------------------------------------------------|-------------------------------------------------------------------|
| 2 $\theta$ range for data collection/ $^{\circ}$ | 5.856 to 152.746                                                  |
| Index ranges                                     | $-39 \leq h \leq 39$ , $-11 \leq k \leq 8$ , $-38 \leq l \leq 35$ |
| Reflections collected                            | 34155                                                             |
| Independent reflections                          | 8925 [ $R_{\text{int}} = 0.0494$ , $R_{\text{sigma}} = 0.0453$ ]  |
| Data/restraints/parameters                       | 8925/1/581                                                        |
| Goodness-of-fit on $F^2$                         | 1.077                                                             |
| Final R indexes [ $I \geq 2\sigma(I)$ ]          | $R_1 = 0.0591$ , $wR_2 = 0.1708$                                  |
| Final R indexes [all data]                       | $R_1 = 0.0666$ , $wR_2 = 0.1775$                                  |
| Largest diff. peak/hole / $e \text{ \AA}^{-3}$   | 0.47/-1.03                                                        |

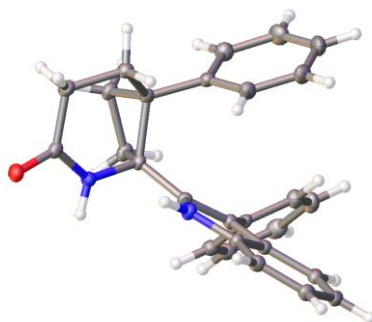

**Supplementary Figure 16.** X-ray structure of compound **5c**

Single crystals for X-ray studies were grown by slow evaporation of a solution of compound **5c** in a mixture of  $\text{CHCl}_3$ /heptane in an NMR tube at room temperature. The X-ray data of **5c** is deposited in the Cambridge Crystallographic Data Centre with a number of CCDC 2518231.

**Supplementary Table 4.** Crystal data and structure refinement for **5c**.

|                                     |                                                           |
|-------------------------------------|-----------------------------------------------------------|
| Identification code                 | 38-CR-20250908F_auto                                      |
| Empirical formula                   | $\text{C}_{28}\text{H}_{25}\text{Cl}_3\text{N}_2\text{O}$ |
| Formula weight                      | 511.85                                                    |
| Temperature/K                       | 100.00(10)                                                |
| Crystal system                      | triclinic                                                 |
| Space group                         | P-1                                                       |
| $a/\text{\AA}$                      | 8.5198(2)                                                 |
| $b/\text{\AA}$                      | 9.5021(2)                                                 |
| $c/\text{\AA}$                      | 16.2326(4)                                                |
| $\alpha/^\circ$                     | 96.133(2)                                                 |
| $\beta/^\circ$                      | 93.496(2)                                                 |
| $\gamma/^\circ$                     | 107.290(2)                                                |
| Volume/ $\text{\AA}^3$              | 1241.60(5)                                                |
| Z                                   | 2                                                         |
| $\rho_{\text{calc}} \text{ g/cm}^3$ | 1.369                                                     |

|                                                |                                                               |
|------------------------------------------------|---------------------------------------------------------------|
| $\mu/\text{mm}^{-1}$                           | 3.528                                                         |
| F(000)                                         | 532.0                                                         |
| Crystal size/ $\text{mm}^3$                    | $0.18 \times 0.13 \times 0.1$                                 |
| Radiation                                      | Cu K $\alpha$ ( $\lambda = 1.54184$ )                         |
| $2\Theta$ range for data collection/ $^\circ$  | 9.834 to 149.038                                              |
| Index ranges                                   | $-10 \leq h \leq 10, -7 \leq k \leq 11, -20 \leq l \leq 20$   |
| Reflections collected                          | 20378                                                         |
| Independent reflections                        | 4984 [ $R_{\text{int}} = 0.0292, R_{\text{sigma}} = 0.0190$ ] |
| Data/restraints/parameters                     | 4984/30/331                                                   |
| Goodness-of-fit on $F^2$                       | 1.045                                                         |
| Final R indexes [ $I \geq 2\sigma(I)$ ]        | $R_1 = 0.0343, wR_2 = 0.0912$                                 |
| Final R indexes [all data]                     | $R_1 = 0.0352, wR_2 = 0.0919$                                 |
| Largest diff. peak/hole / $e \text{ \AA}^{-3}$ | 0.32/-0.43                                                    |

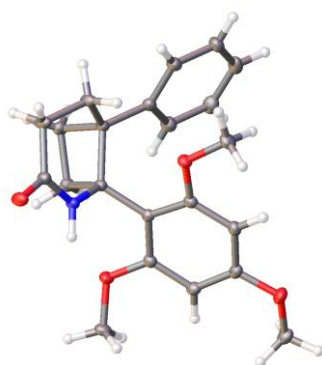

**Supplementary Figure 17.** X-ray structure of compound **5q**

Single crystals for X-ray studies were grown by slow evaporation of a solution of compound **5q** in a mixture of DCM/heptane in an NMR tube at room temperature. The X-ray data of **5q** is deposited in the Cambridge Crystallographic Data Centre with a number of CCDC 2518209.

**Supplementary Table 5.** Crystal data and structure refinement for **5q**.

|                     |                                         |
|---------------------|-----------------------------------------|
| Identification code | 37-MR-20251210A_auto                    |
| Empirical formula   | $\text{C}_{22}\text{H}_{25}\text{NO}_4$ |
| Formula weight      | 367.43                                  |
| Temperature/K       | 100.00(10)                              |
| Crystal system      | triclinic                               |
| Space group         | P-1                                     |
| $a/\text{\AA}$      | 8.39519(16)                             |
| $b/\text{\AA}$      | 10.29504(19)                            |
| $c/\text{\AA}$      | 11.8860(2)                              |
| $\alpha/^\circ$     | 109.1083(16)                            |

|                                                |                                                               |
|------------------------------------------------|---------------------------------------------------------------|
| $\beta/^\circ$                                 | 104.1951(16)                                                  |
| $\gamma/^\circ$                                | 99.0491(15)                                                   |
| Volume/ $\text{\AA}^3$                         | 908.86(3)                                                     |
| Z                                              | 2                                                             |
| $\rho_{\text{calc}} \text{ g/cm}^3$            | 1.343                                                         |
| $\mu/\text{mm}^{-1}$                           | 0.092                                                         |
| F(000)                                         | 392.0                                                         |
| Crystal size/ $\text{mm}^3$                    | $0.34 \times 0.24 \times 0.22$                                |
| Radiation                                      | Mo K $\alpha$ ( $\lambda = 0.71073$ )                         |
| $2\Theta$ range for data collection/ $^\circ$  | 5.182 to 59.148                                               |
| Index ranges                                   | $-11 \leq h \leq 11, -14 \leq k \leq 14, -16 \leq l \leq 16$  |
| Reflections collected                          | 22556                                                         |
| Independent reflections                        | 5017 [ $R_{\text{int}} = 0.0323, R_{\text{sigma}} = 0.0275$ ] |
| Data/restraints/parameters                     | 5017/0/251                                                    |
| Goodness-of-fit on $F^2$                       | 1.064                                                         |
| Final R indexes [ $I > 2\sigma(I)$ ]           | $R_1 = 0.0395, wR_2 = 0.1051$                                 |
| Final R indexes [all data]                     | $R_1 = 0.0465, wR_2 = 0.1104$                                 |
| Largest diff. peak/hole / $e \text{ \AA}^{-3}$ | 0.40/-0.23                                                    |

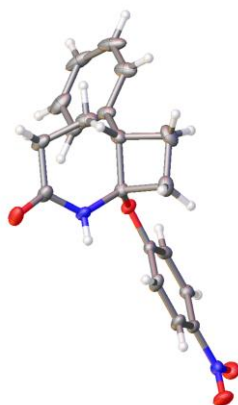

**Supplementary Figure 18.** X-ray structure of compound **6f**

Single crystals for X-ray studies were grown by slow evaporation of a solution of compound **6f** in a mixture of DCM/heptane in 4 mL tube at room temperature. The X-ray data of **6f** is deposited in the Cambridge Crystallographic Data Centre with a number of CCDC 2518213.

**Supplementary Table 6.** Crystal data and structure refinement for **6f**.

|                     |                                                  |
|---------------------|--------------------------------------------------|
| Identification code | 37-MR-20251208A                                  |
| Empirical formula   | $\text{C}_{19}\text{H}_{18}\text{N}_2\text{O}_4$ |
| Formula weight      | 338.35                                           |
| Temperature/K       | 100.00(10)                                       |

|                                             |                                                               |
|---------------------------------------------|---------------------------------------------------------------|
| Crystal system                              | monoclinic                                                    |
| Space group                                 | P2 <sub>1</sub> /c                                            |
| a/Å                                         | 7.2460(3)                                                     |
| b/Å                                         | 12.2378(4)                                                    |
| c/Å                                         | 18.5684(8)                                                    |
| α/°                                         | 90                                                            |
| β/°                                         | 100.138(4)                                                    |
| γ/°                                         | 90                                                            |
| Volume/Å <sup>3</sup>                       | 1620.85(11)                                                   |
| Z                                           | 4                                                             |
| ρ <sub>calc</sub> g/cm <sup>3</sup>         | 1.387                                                         |
| μ/mm <sup>-1</sup>                          | 0.098                                                         |
| F(000)                                      | 712.0                                                         |
| Crystal size/mm <sup>3</sup>                | 0.23 × 0.2 × 0.13                                             |
| Radiation                                   | Mo Kα (λ = 0.71073)                                           |
| 2θ range for data collection/°              | 4.456 to 52.744                                               |
| Index ranges                                | -9 ≤ h ≤ 9, -15 ≤ k ≤ 15, -23 ≤ l ≤ 20                        |
| Reflections collected                       | 12649                                                         |
| Independent reflections                     | 3313 [R <sub>int</sub> = 0.0333, R <sub>sigma</sub> = 0.0286] |
| Data/restraints/parameters                  | 3313/0/230                                                    |
| Goodness-of-fit on F <sup>2</sup>           | 1.296                                                         |
| Final R indexes [I >= 2σ (I)]               | R <sub>1</sub> = 0.0852, wR <sub>2</sub> = 0.1930             |
| Final R indexes [all data]                  | R <sub>1</sub> = 0.0892, wR <sub>2</sub> = 0.1946             |
| Largest diff. peak/hole / e Å <sup>-3</sup> | 0.35/-0.36                                                    |

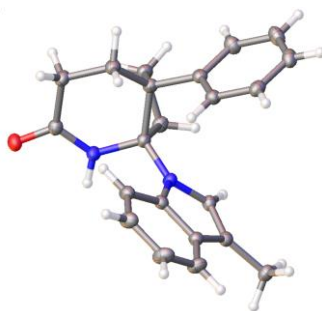

**Supplementary Figure 19.** X-ray structure of compound **7a**

Single crystals for X-ray studies were grown by slow evaporation of a solution of compound **7a** in a mixture of CDCl<sub>3</sub>/heptane in an NMR tube at room temperature. The X-ray data of **7a** is deposited in the Cambridge Crystallographic Data Centre with a number of CCDC 2518207.

**Supplementary Table 7.** Crystal data and structure refinement for **7a**.

Identification code 38-CR-20251210A\_auto

|                                             |                                                                                       |
|---------------------------------------------|---------------------------------------------------------------------------------------|
| Empirical formula                           | C <sub>22.5</sub> H <sub>22</sub> Cl <sub>1.5</sub> D <sub>0.5</sub> N <sub>2</sub> O |
| Formula weight                              | 390.60                                                                                |
| Temperature/K                               | 100.00(10)                                                                            |
| Crystal system                              | triclinic                                                                             |
| Space group                                 | P-1                                                                                   |
| a/Å                                         | 8.2063(3)                                                                             |
| b/Å                                         | 10.2047(3)                                                                            |
| c/Å                                         | 12.6923(4)                                                                            |
| α/°                                         | 78.524(3)                                                                             |
| β/°                                         | 77.279(3)                                                                             |
| γ/°                                         | 69.660(3)                                                                             |
| Volume/Å <sup>3</sup>                       | 963.41(6)                                                                             |
| Z                                           | 2                                                                                     |
| ρ <sub>calc</sub> g/cm <sup>3</sup>         | 1.346                                                                                 |
| μ/mm <sup>-1</sup>                          | 2.501                                                                                 |
| F(000)                                      | 410.0                                                                                 |
| Crystal size/mm <sup>3</sup>                | 0.22 × 0.2 × 0.14                                                                     |
| Radiation                                   | Cu Kα (λ = 1.54184)                                                                   |
| 2θ range for data collection/°              | 7.204 to 150.472                                                                      |
| Index ranges                                | -10 ≤ h ≤ 10, -12 ≤ k ≤ 12, -14 ≤ l ≤ 15                                              |
| Reflections collected                       | 14939                                                                                 |
| Independent reflections                     | 3868 [R <sub>int</sub> = 0.0259, R <sub>sigma</sub> = 0.0230]                         |
| Data/restraints/parameters                  | 3868/0/263                                                                            |
| Goodness-of-fit on F <sup>2</sup>           | 1.066                                                                                 |
| Final R indexes [I ≥ 2σ (I)]                | R <sub>1</sub> = 0.0397, wR <sub>2</sub> = 0.1051                                     |
| Final R indexes [all data]                  | R <sub>1</sub> = 0.0425, wR <sub>2</sub> = 0.1071                                     |
| Largest diff. peak/hole / e Å <sup>-3</sup> | 0.29/-0.35                                                                            |

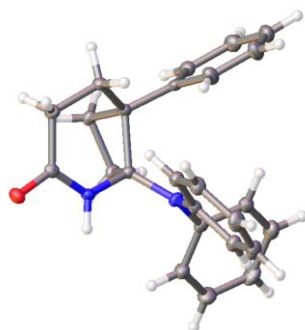

**Supplementary Figure 20.** X-ray structure of compound **7b**

Single crystals for X-ray studies were grown by slow evaporation of a solution of compound **7b** in a mixture of CDCl<sub>3</sub>/heptane in an NMR tube at room temperature. The

X-ray data of **7b** is deposited in the Cambridge Crystallographic Data Centre with a number of CCDC 2518233.

**Supplementary Table 8.** Crystal data and structure refinement for **7b**.

|                                             |                                                                                               |
|---------------------------------------------|-----------------------------------------------------------------------------------------------|
| Identification code                         | 37-MR-20251210B_auto                                                                          |
| Empirical formula                           | C <sub>55</sub> H <sub>48</sub> Cl <sub>15</sub> D <sub>5</sub> N <sub>4</sub> O <sub>2</sub> |
| Formula weight                              | 1338.79                                                                                       |
| Temperature/K                               | 100.00(10)                                                                                    |
| Crystal system                              | monoclinic                                                                                    |
| Space group                                 | P2 <sub>1</sub> /n                                                                            |
| a/Å                                         | 14.5636(2)                                                                                    |
| b/Å                                         | 19.4453(3)                                                                                    |
| c/Å                                         | 21.1345(2)                                                                                    |
| α/°                                         | 90                                                                                            |
| β/°                                         | 91.2433(11)                                                                                   |
| γ/°                                         | 90                                                                                            |
| Volume/Å <sup>3</sup>                       | 5983.74(13)                                                                                   |
| Z                                           | 4                                                                                             |
| ρ <sub>calc</sub> g/cm <sup>3</sup>         | 1.486                                                                                         |
| μ/mm <sup>-1</sup>                          | 0.734                                                                                         |
| F(000)                                      | 2728.0                                                                                        |
| Crystal size/mm <sup>3</sup>                | 0.2 × 0.14 × 0.11                                                                             |
| Radiation                                   | Mo Kα (λ = 0.71073)                                                                           |
| 2θ range for data collection/°              | 3.432 to 52.742                                                                               |
| Index ranges                                | -17 ≤ h ≤ 18, -24 ≤ k ≤ 24, -26 ≤ l ≤ 26                                                      |
| Reflections collected                       | 57297                                                                                         |
| Independent reflections                     | 12220 [R <sub>int</sub> = 0.0284, R <sub>sigma</sub> = 0.0245]                                |
| Data/restraints/parameters                  | 12220/307/760                                                                                 |
| Goodness-of-fit on F <sup>2</sup>           | 1.034                                                                                         |
| Final R indexes [I ≥ 2σ (I)]                | R <sub>1</sub> = 0.0401, wR <sub>2</sub> = 0.1032                                             |
| Final R indexes [all data]                  | R <sub>1</sub> = 0.0464, wR <sub>2</sub> = 0.1079                                             |
| Largest diff. peak/hole / e Å <sup>-3</sup> | 0.83/-0.98                                                                                    |

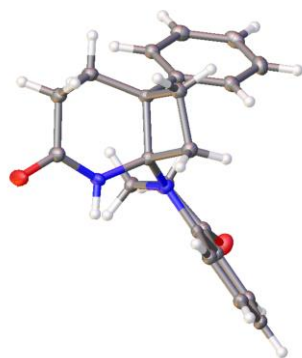

**Supplementary Figure 21.** X-ray structure of compound **7c**

Single crystals for X-ray studies were grown by slow evaporation of a solution of compound **7c** in a mixture of  $\text{CDCl}_3$ /heptane in an NMR tube at room temperature. The X-ray data of **7c** is deposited in the Cambridge Crystallographic Data Centre with a number of CCDC 2518223.

**Supplementary Table 9.** Crystal data and structure refinement for **7c**.

|                                               |                                                               |
|-----------------------------------------------|---------------------------------------------------------------|
| Identification code                           | 38-CR-20251205B_auto                                          |
| Empirical formula                             | $\text{C}_{44}\text{H}_{44}\text{N}_4\text{O}_4$              |
| Formula weight                                | 692.83                                                        |
| Temperature/K                                 | 100.00(10)                                                    |
| Crystal system                                | monoclinic                                                    |
| Space group                                   | $P2_1$                                                        |
| $a/\text{\AA}$                                | 11.0004(2)                                                    |
| $b/\text{\AA}$                                | 11.4646(2)                                                    |
| $c/\text{\AA}$                                | 13.3602(2)                                                    |
| $\alpha/^\circ$                               | 90                                                            |
| $\beta/^\circ$                                | 92.6991(16)                                                   |
| $\gamma/^\circ$                               | 90                                                            |
| Volume/ $\text{\AA}^3$                        | 1683.06(6)                                                    |
| Z                                             | 2                                                             |
| $\rho_{\text{calc}}/\text{g/cm}^3$            | 1.367                                                         |
| $\mu/\text{mm}^{-1}$                          | 0.700                                                         |
| F(000)                                        | 736.0                                                         |
| Crystal size/ $\text{mm}^3$                   | $0.2 \times 0.16 \times 0.11$                                 |
| Radiation                                     | Cu $K\alpha$ ( $\lambda = 1.54184$ )                          |
| $2\Theta$ range for data collection/ $^\circ$ | 6.624 to 151.292                                              |
| Index ranges                                  | $-13 \leq h \leq 13, -14 \leq k \leq 14, -16 \leq l \leq 12$  |
| Reflections collected                         | 28172                                                         |
| Independent reflections                       | 6557 [ $R_{\text{int}} = 0.0463, R_{\text{sigma}} = 0.0334$ ] |

|                                                |                                  |
|------------------------------------------------|----------------------------------|
| Data/restraints/parameters                     | 6557/3/477                       |
| Goodness-of-fit on $F^2$                       | 1.044                            |
| Final R indexes [ $I \geq 2\sigma(I)$ ]        | $R_1 = 0.0322$ , $wR_2 = 0.0853$ |
| Final R indexes [all data]                     | $R_1 = 0.0331$ , $wR_2 = 0.0860$ |
| Largest diff. peak/hole / $e \text{ \AA}^{-3}$ | 0.18/-0.20                       |
| Flack parameter                                | 0.06(10)                         |

## 7. Computational Details

All DFT calculations were carried out with Gaussian16-RevC.01 quantum chemical package.<sup>[4]</sup> Geometry optimizations were performed with B3LYP<sup>[5]</sup> functional with Grimme's D3BJ<sup>[6]</sup> dispersion correction. The iridium atom was represented using the Los Alamos LANL2DZ<sup>[7]</sup> basis set, which includes relativistic effective core potentials, and 6-31g\*<sup>[8]</sup> for other atoms. For those structures having various conformations, the most stable conformer was searched and utilized using CREST<sup>[9]</sup>. Vibrational frequency calculations were carried out at the same level of theory as the geometry optimizations (No imaginary frequency for local minima and only one imaginary for transition states) and to provide the thermal corrections for Gibbs free energy determinations. Intrinsic reaction coordinate (IRC) calculations were done to confirm that the transition states proposed connected the appropriate reactants and products. The single-point calculations of the optimized geometries were performed with M06<sup>[10]</sup> functional with Grimme's D3(0)<sup>[5]</sup> dispersion correction and triple-zeta quality Def2-TZVPP<sup>[11]</sup> basis set for all atoms. We obtained solvation energies using the optimized gas phase structures with SMD<sup>[12]</sup> (HFIP<sup>[13]</sup>) model. Solvation calculations were carried out with the same level of single-point calculations employing HFIP as the model solvent. The raw energy data were processed and corrected employing the GoodVibes Python package (version 3.2)<sup>[14]</sup> to incorporate quasi-harmonic approximations for low-frequency vibrational modes and standard state corrections. Specifically, Gibbs free energies were adjusted to the standard state of 1.0 mol/L at 300.00 K and 1 atm. All reported energies are in kcal/mol unless otherwise specified. Electronic wavefunction analysis is performed by Multiwfn<sup>[15]</sup> software. Graphical structures are visualized with VMD<sup>[16]</sup>, CYLview<sup>[17]</sup> and GaussView.

*Note: as HFIP is not by default parametrized within the SMD model implemented in Gaussian, the following parameters were used following a report by Paton and coworkers<sup>22</sup>:  $\epsilon_{\text{ps}} = 16.7$ ;  $\epsilon_{\text{psinf}} = 1.625626$ ; H Bond Acidity = 1.96; h bond basicity = 0.00; Surface Tension At Interface = 23.23; ElectronegativeHalogenicity = 0.6; CarbonAromaticity = 0.00.*

## 7.1 Dissociation Iridium Dimer and Dioxazolone Coordination

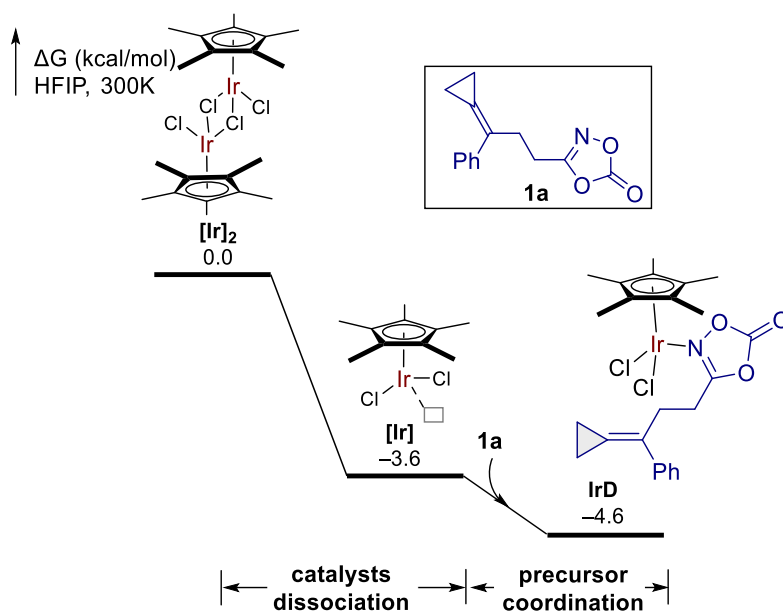

**Supplementary Figure 22.** Energy diagram of the reaction pathway (energies are relative to  $[\text{Cp}^*\text{IrCl}_2]_2$ , in kcal/mol).

Computational studies reveal that the dissociation of  $[\text{Cp}^*\text{IrCl}_2]_2$  in solution is a thermally favorable process (-3.6 kcal/mol), leading to the formation of an **[Ir]** intermediate. This species subsequently coordinates with dioxazolone **1a** to yield a more stable **IrD** intermediate with a lower relative energy of -4.6 kcal/mol.

## 7.2 Energy diagram of Ir-nitrenoid formation

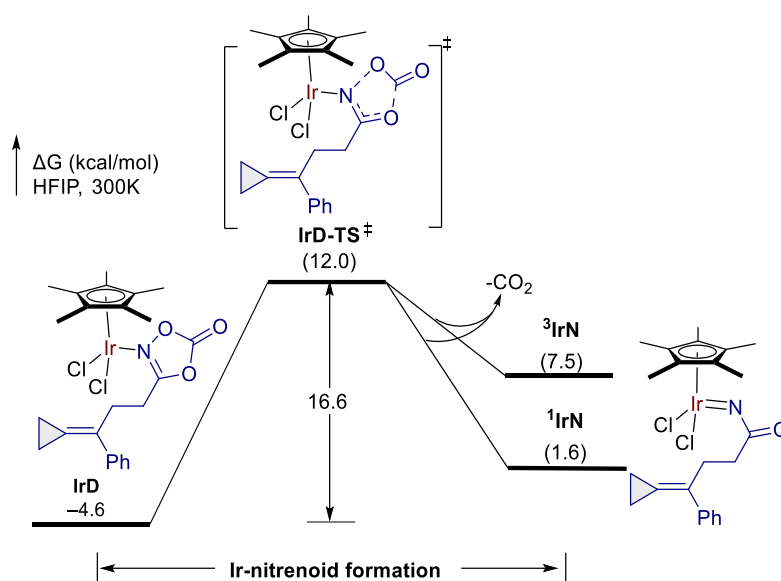

**Supplementary Figure 23.** Energy diagram of Ir-nitrenoid formation (energies are relative to  $[\text{Cp}^*\text{IrCl}_2]_2$ , in kcal/mol).

The **IrD** complex subsequently undergoes decarboxylation via transition state **IrD-TS<sup>‡</sup>** to generate the singlet Ir–nitrenoid species (**<sup>1</sup>IrN**, 1.6 kcal/mol). This step entails an activation barrier of 16.6 kcal/mol, which is kinetically accessible at room temperature. Furthermore, the corresponding triplet species (**<sup>3</sup>IrN**, 7.5 kcal/mol) was found to lie significantly higher in energy.

### 7.3 Alkene aziridination

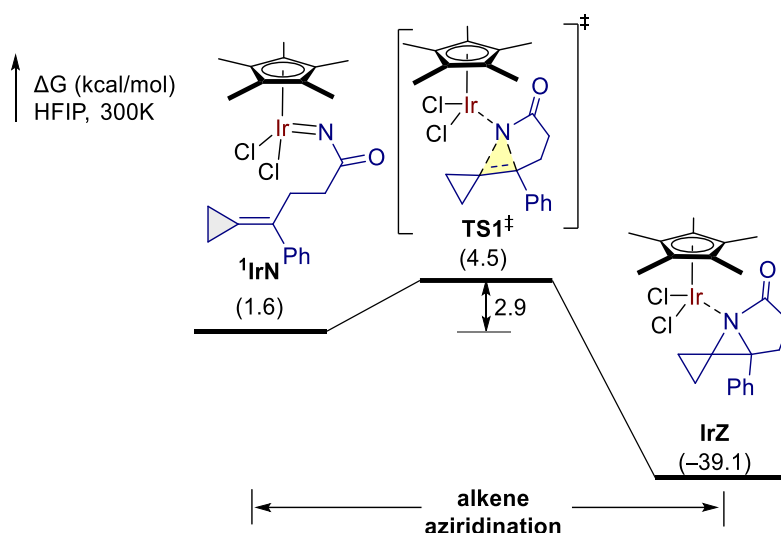

**Supplementary Figure 24.** Energy diagram of alkene aziridination (energies are relative to  $[\text{Cp}^*\text{IrCl}_2]_2$ , in kcal/mol).

The singlet Ir–nitrenoid species (**<sup>1</sup>IrN**) then undergoes an aziridination pathway to yield the aziridine complex **IrZ**. This process is characterized by a remarkably low activation barrier of only 2.9 kcal/mol. Based on geometric parameters and Intrinsic Reaction Coordinate (IRC) analysis, this transformation is identified as a *concerted asynchronous process*.

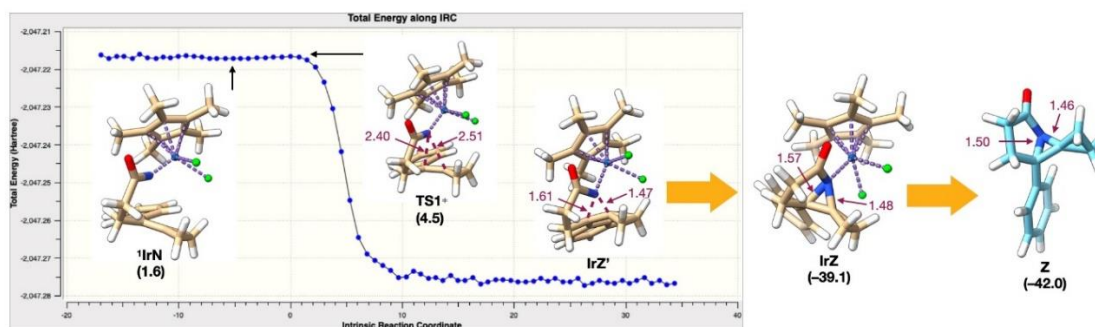

**Supplementary Figure 25.** IRC analysis of alkene aziridination

We conducted detailed DFT calculations to investigate the aziridination of substrate

<sup>1</sup>**IrN**. Intrinsic Reaction Coordinate (IRC) analysis indicates that the process proceeds via a *concerted asynchronous mechanism*. Specifically, the carbon atom at the MCPs terminus preferentially attacks the Ir-nitrenoid nitrogen to initiate C–N bond formation, followed by the formation of a second C–N bond with the benzylic carbon. In the resulting intermediate **IrZ**, the two C–N bonds measure 1.57 Å and 1.48 Å, respectively—notably longer than those in the free aziridine **Z** (1.50 Å and 1.46 Å). This bond elongation in **IrZ** suggests a lower activation barrier for bond cleavage, thereby facilitating the subsequent ring-expansion and rearrangement processes. This mechanism is further supported by the geometric analysis of **TS1<sup>‡</sup>**, which exhibits two distinct C–N distances of 2.40 Å and 2.51 Å.

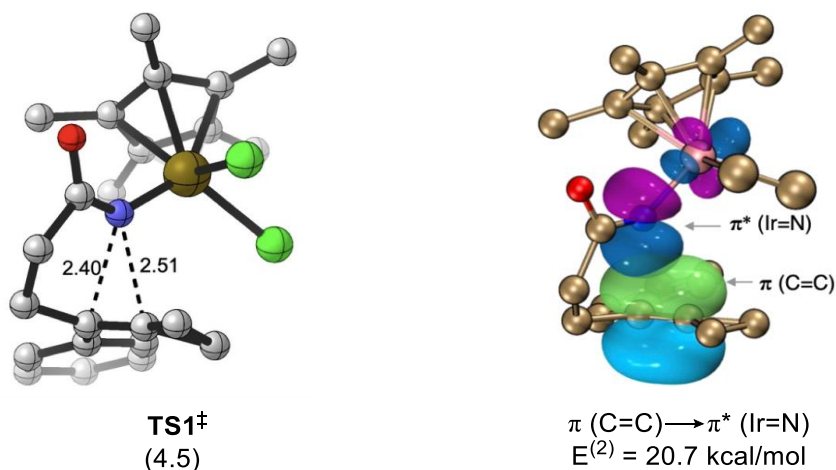

**Supplementary Figure 26.** Geometric and NBO analysis of alkene aziridination **TS1<sup>‡</sup>**

Furthermore, Natural Bond Orbital (NBO) analysis<sup>[18]</sup> reveals a significant hyperconjugative interaction between the  $\pi$  orbital of the alkene and the  $\pi^*$  antibonding orbital of the Ir=N moiety ( $E^{(2)}=20.7$  kcal/mol), which facilitates the formation of the Ir-bound tricyclic aziridine intermediate **IrZ**.

## 7.4 Comparison of the two possible pathways from IrZ to lactam 3a

### 7.4.1 From IrZ to lactam 3a: a favorable pathway

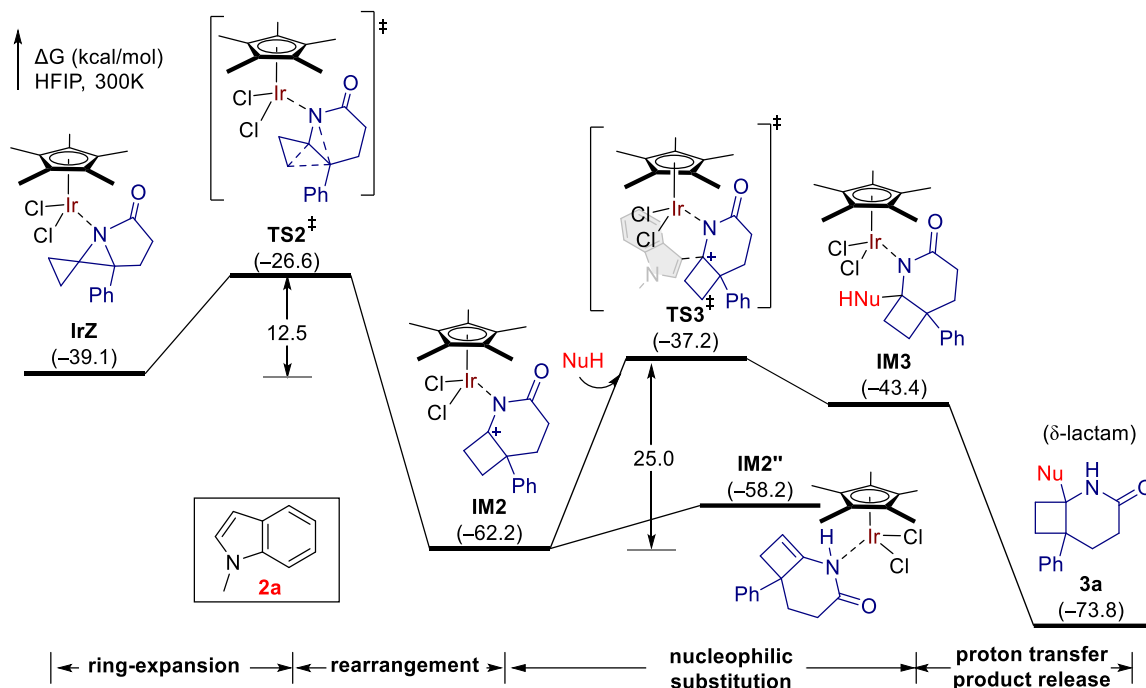

**Supplementary Figure 27.** Energy diagram of ring-expansion and rearrangement (energies are relative to  $[\text{Cp}^*\text{IrCl}_2]_2$ , in kcal/mol).

The resulting intermediate **IrZ** undergoes a more favorable direct ring-expansion rearrangement via transition state **TS2<sup>‡</sup>** to form the carbocation intermediate **IM2**. IRC analysis characterizes this ring-expansion and rearrangement as a *concerted asynchronous process*. Specifically, the process begins with the C–N bond cleavage of the aziridine to form a short-lived tertiary carbocation intermediate, **IM2'**. The energy of **IM2'** is closely comparable to that of **IrZ**, suggesting a dynamic equilibrium between these two species, mediated by an activation barrier of 12.5 kcal/mol. Subsequently, **IM2'** undergoes a rapid rearrangement to yield a thermodynamically more stable, nitrogen-stabilized carbocation **IM2** (-62.2 kcal/mol). Following this, **IM2** undergoes an  $\text{S}_{\text{N}}1$ -type nucleophilic substitution with *N*-methylindole **2a**, affording intermediate **IM3** via a transition state with a Gibbs free energy barrier of 25.0 kcal/mol. Notably, the nucleophilic attack is guided by multiple non-covalent interactions (NCIs) involving the chlorine atom on the catalyst (as supported by NCI analysis in Section 7.6). Finally, **IM3** undergoes proton transfer to yield the  $\delta$ -lactam **3a**, while

simultaneously regenerating the active [Ir] catalyst, thereby completing the catalytic cycle.

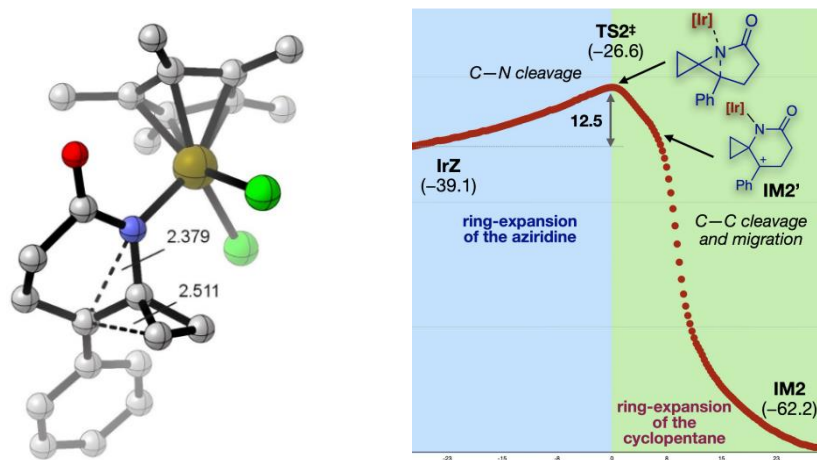

TS2<sup>‡</sup> (-26.6 kcal/mol)

Supplementary Figure 28. TS and IRC analysis of ring-expansion and rearrangement (TS2<sup>‡</sup>)

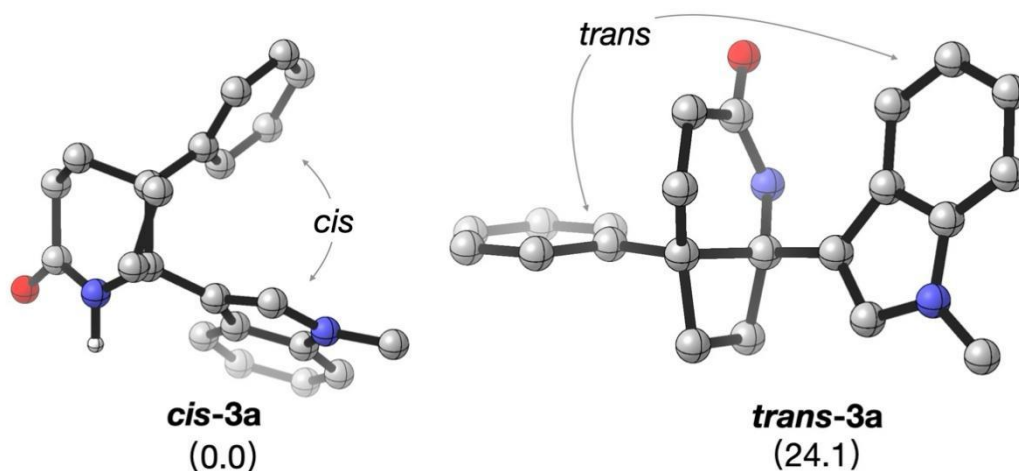

Supplementary Figure 29. Two distinct configurations of product **3a**

In our experiments, only the *cis-3a* isomer of product **3a** was observed, while the *trans-3a* isomer was not detected. Density functional theory (DFT) calculations indicate that the *cis-3a* configuration is more stable than the *trans-3a* configuration (0.0 kcal/mol vs 24.1 kcal/mol).

### 7.4.2 From IrZ to lactam 3a: a unfavorable pathway

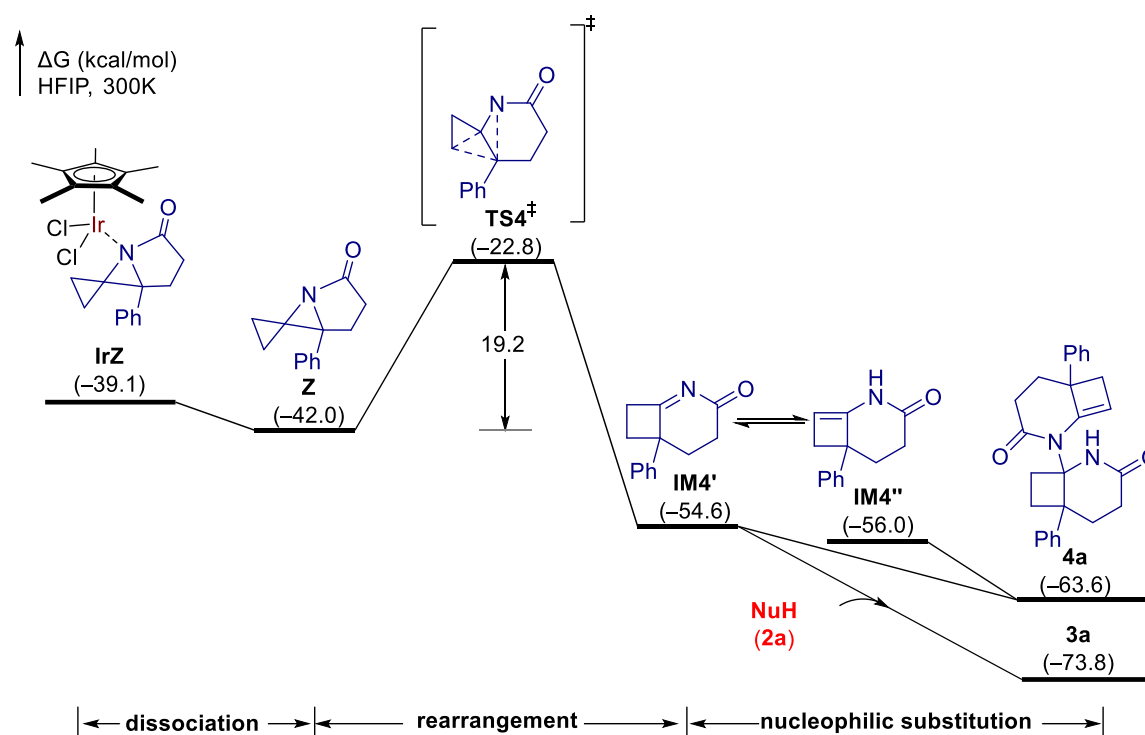

**Supplementary Figure 30.** Energy diagram of catalyst dissociation and rearrangement (energies are relative to  $[\text{Cp}^*\text{IrCl}_2]_2$ , in kcal/mol).

The reaction pathway involves the dissociation of IrZ to release the free aziridine Z, which subsequently undergoes a ring-expansion rearrangement via transition state TS4<sup>‡</sup> (-22.8 kcal/mol,  $\Delta G^\ddagger = 19.2$  kcal/mol relative to Z) to afford intermediate IM4'. In contrast, the iridium-coordinated ring-expansion/rearrangement via TS2<sup>‡</sup> is significantly more favorable, with a relative energy of -26.6 kcal/mol. Therefore, we conclude that the Ir-assisted pathway via TS2<sup>‡</sup> is the energetically preferred route. While the pathway involving TS4<sup>‡</sup> is considerably less favorable (unfavorable), its contribution to the overall reaction cannot be entirely ruled out. Nucleophilic capture of IM4' yields the  $\delta$ -lactam 3a, while an alternative rearrangement leads to the thermodynamically more stable species IM4''. Both IM4' and IM4'' can undergo homocoupling, forming the dimeric product 4a, consistent with experimental observations.

## 7.5 Structural analysis of 3a and 4a

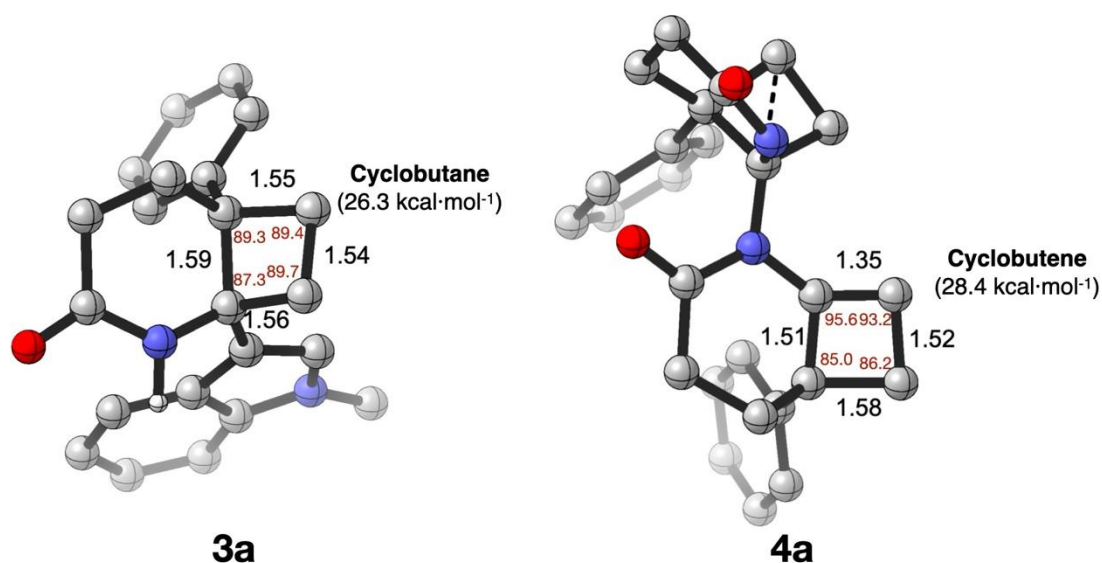

Supplementary Figure 31. Structural Analysis of **3a** and **4a**

DFT-optimized structures were visualized using CYLview. For cyclobutane-fused  $\delta$ -lactam **3a**, the four internal angles of the cyclobutane ring all fall within 88-90°, and the bond lengths range from 1.54 to 1.59 Å. Similarly, in the dimeric cyclobutene-fused  $\delta$ -lactam **4a**, the cyclobutene fragment is markedly distorted, with the maximum bond angle reaching 95.6°, and the C1–C4 bond length significantly shortened to only 1.35 Å.



## 7.7 Energy summary table

| Structure       | E_SPC        | E            | ZPE      | H_SPC        | T.S      | T.qh-S   | G(T)_SPC     | qh-G(T)_SPC  | Im.freq | ΔG    |
|-----------------|--------------|--------------|----------|--------------|----------|----------|--------------|--------------|---------|-------|
| 1a              | -821.396322  | -821.109762  | 0.24386  | -821.136042  | 0.058695 | 0.055576 | -821.194737  | -821.191618  |         |       |
| 1IrN            | -2047.695067 | -2047.217577 | 0.452859 | -2047.209133 | 0.094774 | 0.08897  | -2047.303907 | -2047.298103 |         | 1.6   |
| 2a              | -402.96536   | -402.879689  | 0.157684 | -402.798763  | 0.038756 | 0.038539 | -402.837519  | -402.837302  |         |       |
| 3IrN            | -2047.684598 | -2047.214242 | 0.452621 | -2047.198829 | 0.095571 | 0.089937 | -2047.2944   | -2047.288766 |         | 7.5   |
| 3a              | -1035.950056 | -1035.694034 | 0.394271 | -1035.534341 | 0.067639 | 0.064488 | -1035.601981 | -1035.598829 |         | -73.8 |
| 4a              | -1265.911873 | -1265.572339 | 0.468009 | -1265.418643 | 0.07555  | 0.071659 | -1265.494194 | -1265.490302 |         | -63.6 |
| CO <sub>2</sub> | -188.541722  | -188.44468   | 0.011776 | -188.526342  | 0.021414 | 0.021415 | -188.547756  | -188.547756  |         |       |
| IM2             | -2047.802118 | -2047.324615 | 0.456865 | -2047.313472 | 0.09154  | 0.086364 | -2047.405012 | -2047.399836 |         | -62.2 |
| IM2''           | -2047.79561  | -2047.324123 | 0.45724  | -2047.306562 | 0.092571 | 0.086874 | -2047.399132 | -2047.393436 |         | -58.2 |
| IM3             | -2450.765785 | -2450.202273 | 0.618674 | -2450.107746 | 0.104896 | 0.099502 | -2450.212641 | -2450.207248 |         | -43.4 |
| IM4'            | -632.926801  | -632.750047  | 0.230837 | -632.682859  | 0.049796 | 0.048033 | -632.732654  | -632.730892  |         | -54.6 |
| IM4''           | -632.930252  | -632.761474  | 0.231611 | -632.685685  | 0.048784 | 0.04742  | -632.734469  | -632.733106  |         | -56.0 |
| Ir2             | -2829.702993 | -2829.104482 | 0.449674 | -2829.216059 | 0.103292 | 0.097659 | -2829.319351 | -2829.313718 |         | 0.0   |
| IrD             | -2236.268688 | -2235.68324  | 0.470042 | -2235.763705 | 0.097345 | 0.092062 | -2235.86105  | -2235.855767 |         | -4.6  |
| IrD-TS          | -2236.238689 | -2235.65275  | 0.467056 | -2235.736365 | 0.098735 | 0.093004 | -2235.8351   | -2235.829369 | -183.11 | 12.0  |
| Ir              | -1414.844396 | -1414.522032 | 0.223724 | -1414.602027 | 0.063494 | 0.060647 | -1414.665521 | -1414.662673 |         | -3.6  |
| IrZ             | -2047.765889 | -2047.279034 | 0.456145 | -2047.278209 | 0.088579 | 0.084909 | -2047.366788 | -2047.363118 |         | -39.1 |
| trans-3         | -1035.911975 | -1035.655952 | 0.394218 | -1035.496604 | 0.06636  | 0.063809 | -1035.562964 | -1035.560412 |         | -49.7 |
| TS1             | -2047.692266 | -2047.216705 | 0.452886 | -2047.207328 | 0.090167 | 0.086153 | -2047.297495 | -2047.293481 | -95.24  | 4.5   |
| TS1_pdt         | -2047.765855 | -2047.279034 | 0.456147 | -2047.278174 | 0.088564 | 0.084901 | -2047.366739 | -2047.363075 |         | -39.1 |
| TS2_IM2         | -2047.790799 | -2047.320089 | 0.457628 | -2047.301572 | 0.090699 | 0.085724 | -2047.392271 | -2047.387296 |         | -54.3 |
| TS2             | -2047.744505 | -2047.258952 | 0.454545 | -2047.258852 | 0.087659 | 0.084206 | -2047.346511 | -2047.343057 | -106.98 | -26.6 |
| TS3-SM          | -2450.783138 | -2450.228014 | 0.616343 | -2450.125146 | 0.114281 | 0.105629 | -2450.239427 | -2450.230775 |         | -58.2 |
| TS3             | -2450.755627 | -2450.1979   | 0.618388 | -2450.098058 | 0.104286 | 0.099238 | -2450.202344 | -2450.197295 | -251.5  | -37.2 |
| TS4             | -632.872063  | -632.666212  | 0.226522 | -632.632469  | 0.04862  | 0.047652 | -632.681089  | -632.680121  | -334.16 | -22.8 |
| Z               | -632.904559  | -632.714184  | 0.229057 | -632.662026  | 0.050397 | 0.04876  | -632.712423  | -632.710786  |         | -42.0 |

**Supplementary Table 10.** Energy summary table. Hcorr = Thermal correction to Enthalpy; Gcorr = Thermal correction to Gibbs Free Energy Gibbs (total) = E(M06) + Gcorr; Enthalpy (total) = E(M06) + Hcor (ΔG in kcal/mol at 300K)

## 7.8 Cartesian coordinates of the optimized geometries (XYZ formation)

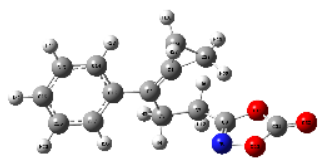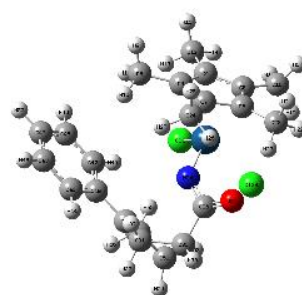

31

**1a**

|   |           |           |           |
|---|-----------|-----------|-----------|
| C | 0.299600  | 1.230114  | 0.285876  |
| C | 0.918153  | 0.052028  | 0.418765  |
| C | 0.191952  | -1.196056 | 0.886734  |
| H | 0.149621  | -1.926487 | 0.061706  |
| H | 0.795191  | -1.671898 | 1.676543  |
| N | -2.150261 | -1.021791 | -0.867851 |
| C | -1.220871 | -0.992698 | 1.431934  |
| C | -2.243101 | -0.747981 | 0.382243  |
| H | -1.262943 | -0.157088 | 2.145604  |
| H | -1.536668 | -1.891699 | 1.989348  |
| O | -3.432653 | -0.200444 | 0.733897  |
| C | 2.363180  | -0.104753 | 0.098647  |
| C | 2.916384  | -1.374847 | -0.156090 |
| C | 3.229717  | 1.005689  | 0.042533  |
| C | 4.268957  | -1.526674 | -0.469519 |
| H | 2.286307  | -2.264102 | -0.128896 |
| C | 4.580176  | 0.853937  | -0.264723 |
| H | 2.840301  | 1.999561  | 0.257187  |
| C | 5.109427  | -0.414097 | -0.526139 |
| H | 4.665661  | -2.524659 | -0.671391 |
| H | 5.227593  | 1.733837  | -0.295245 |
| H | 6.168252  | -0.532373 | -0.767697 |
| C | -0.938716 | 2.023811  | 0.315634  |
| C | 0.392470  | 2.632211  | -0.129709 |
| H | -1.691059 | 1.847268  | -0.461079 |
| H | -1.359442 | 2.347344  | 1.275019  |
| H | 0.531484  | 2.855699  | -1.194265 |
| H | 0.867502  | 3.356970  | 0.542336  |
| O | -3.387953 | -0.613080 | -1.413682 |
| O | -5.276067 | 0.315775  | -0.528751 |
| C | -4.176761 | -0.113658 | -0.430506 |

56

**1IrN**

|    |           |           |           |
|----|-----------|-----------|-----------|
| Cl | 0.356099  | 0.376294  | -2.432959 |
| Ir | 0.943971  | -0.070659 | -0.169904 |
| C  | 1.156040  | 2.054618  | 0.704161  |
| C  | 2.159044  | 1.921945  | -0.340899 |
| C  | 3.006662  | 0.820425  | -0.033755 |
| C  | 2.551089  | 0.257362  | 1.239193  |
| C  | 1.447887  | 1.079278  | 1.706654  |
| C  | 0.091704  | 3.099382  | 0.762692  |
| H  | 0.463720  | 4.007294  | 1.268798  |
| H  | -0.792197 | 2.740181  | 1.305773  |
| H  | -0.237802 | 3.382139  | -0.244969 |
| C  | 2.249673  | 2.821426  | -1.524662 |
| H  | 1.266147  | 2.949845  | -1.996090 |
| H  | 2.934049  | 2.426174  | -2.284500 |
| H  | 2.614622  | 3.810990  | -1.200715 |
| C  | 4.164795  | 0.304340  | -0.823366 |
| H  | 5.115990  | 0.532383  | -0.314840 |
| H  | 4.191726  | 0.748066  | -1.826643 |
| H  | 4.084850  | -0.786107 | -0.943304 |
| C  | 3.222790  | -0.838246 | 1.997952  |
| H  | 3.868112  | -0.410824 | 2.784331  |
| H  | 3.842238  | -1.448408 | 1.329197  |
| H  | 2.470907  | -1.498726 | 2.451734  |
| C  | 0.711015  | 0.901321  | 2.990063  |
| H  | 1.097293  | 1.615602  | 3.736769  |
| H  | 0.830661  | -0.119356 | 3.372703  |
| H  | -0.361972 | 1.091515  | 2.853397  |
| Cl | 1.572232  | -2.247661 | -0.935235 |
| C  | -2.664877 | -1.653539 | -1.171013 |
| C  | -2.952206 | -1.081822 | 0.007199  |
| C  | -2.962208 | -1.931989 | 1.268807  |
| H  | -3.009668 | -1.283632 | 2.155303  |
| H  | -3.874526 | -2.553547 | 1.290490  |

|   |           |           |           |
|---|-----------|-----------|-----------|
| N | -0.347486 | -0.909405 | 0.856206  |
| C | -1.739165 | -2.842084 | 1.404052  |
| C | -0.436043 | -2.077028 | 1.540556  |
| H | -1.642030 | -3.502637 | 0.529418  |
| H | -1.809639 | -3.482575 | 2.295597  |
| O | 0.443561  | -2.410504 | 2.337209  |
| C | -3.300270 | 0.356512  | 0.099446  |
| C | -4.110826 | 0.853808  | 1.137540  |
| C | -2.805136 | 1.276770  | -0.846157 |
| C | -4.422330 | 2.213102  | 1.224475  |
| H | -4.521019 | 0.170047  | 1.882801  |
| C | -3.118921 | 2.632186  | -0.759887 |
| H | -2.137423 | 0.928314  | -1.631988 |
| C | -3.927922 | 3.111667  | 0.276028  |
| H | -5.060851 | 2.569511  | 2.036885  |
| H | -2.717738 | 3.323450  | -1.505982 |
| H | -4.170478 | 4.175054  | 0.343334  |
| C | -2.293338 | -2.877281 | -1.887292 |
| C | -2.604127 | -1.574676 | -2.632400 |
| H | -1.239455 | -3.180925 | -1.849982 |
| H | -3.009072 | -3.706376 | -1.946655 |
| H | -1.764310 | -1.058295 | -3.102829 |
| H | -3.555581 | -1.500148 | -3.173557 |

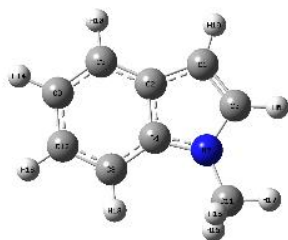

19

**2a**

|   |           |           |           |
|---|-----------|-----------|-----------|
| C | 0.730563  | 1.891840  | 0.001282  |
| C | -0.387754 | 0.988371  | 0.000216  |
| C | 1.866933  | 1.118682  | -0.001850 |
| C | 0.154591  | -0.332306 | -0.003972 |
| C | -1.785924 | 1.147189  | 0.002281  |
| H | 2.914161  | 1.416705  | -0.002442 |
| N | 1.531447  | -0.224326 | -0.007840 |
| C | -0.658807 | -1.473627 | -0.003166 |
| C | -2.595902 | 0.015707  | 0.002087  |
| H | -2.227353 | 2.147055  | 0.004242  |
| C | 2.449614  | -1.337312 | 0.006970  |

|   |           |           |           |
|---|-----------|-----------|-----------|
| C | -2.038279 | -1.281254 | -0.000495 |
| H | -0.231123 | -2.478363 | -0.004474 |
| H | -3.682664 | 0.128667  | 0.004283  |
| H | 2.329020  | -1.944314 | 0.920314  |
| H | 2.292891  | -1.993124 | -0.865693 |
| H | 3.480142  | -0.959517 | -0.025221 |
| H | -2.701062 | -2.149925 | 0.000810  |
| H | 0.695647  | 2.979356  | 0.002947  |

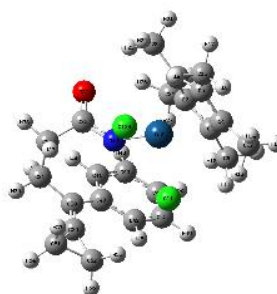

56

**3IrN**

|    |          |           |           |
|----|----------|-----------|-----------|
| Cl | 0.015638 | -0.752038 | -2.258821 |
| Ir | 0.966426 | -0.280677 | -0.088574 |
| C  | 1.763910 | 1.689495  | -0.651753 |
| C  | 2.807049 | 0.751914  | -1.063127 |
| C  | 3.258594 | 0.065165  | 0.089228  |
| C  | 2.499042 | 0.543125  | 1.244684  |
| C  | 1.637752 | 1.612828  | 0.785898  |
| C  | 1.080745 | 2.643708  | -1.573488 |
| H  | 1.788008 | 3.416527  | -1.919274 |
| H  | 0.233887 | 3.135344  | -1.080549 |
| H  | 0.692108 | 2.107139  | -2.450879 |
| C  | 3.250645 | 0.571928  | -2.476847 |
| H  | 2.389987 | 0.307658  | -3.110707 |
| H  | 3.997297 | -0.226908 | -2.568437 |
| H  | 3.689789 | 1.506905  | -2.861590 |
| C  | 4.291323 | -1.007450 | 0.160038  |
| H  | 5.080147 | -0.724430 | 0.874865  |
| H  | 4.752054 | -1.190666 | -0.818644 |
| H  | 3.832402 | -1.949252 | 0.501072  |
| C  | 2.710116 | 0.110682  | 2.658993  |
| H  | 3.496361 | 0.716382  | 3.141808  |
| H  | 3.015394 | -0.943860 | 2.695888  |
| H  | 1.780629 | 0.211763  | 3.235550  |
| C  | 0.780066 | 2.487744  | 1.640154  |
| H  | 1.359465 | 3.371081  | 1.958305  |
| H  | 0.429624 | 1.946327  | 2.527050  |

|          |           |           |           |   |           |           |           |
|----------|-----------|-----------|-----------|---|-----------|-----------|-----------|
| H        | -0.105449 | 2.832294  | 1.090400  | C | 2.752137  | 0.022299  | 0.330654  |
| Cl       | 1.298255  | -2.648367 | 0.235700  | C | 3.925481  | -0.084881 | -0.427570 |
| C        | -3.502115 | -1.511061 | -0.836040 | H | 4.800734  | 0.529577  | -0.207580 |
| C        | -3.407910 | -0.658834 | 0.190767  | C | 3.934990  | -1.000422 | -1.475110 |
| C        | -3.527952 | -1.232099 | 1.590707  | H | 4.832683  | -1.109063 | -2.088154 |
| H        | -4.004308 | -0.516001 | 2.275725  | C | 2.800673  | -1.790521 | -1.754617 |
| H        | -4.188631 | -2.110077 | 1.554596  | H | 2.836147  | -2.503102 | -2.581783 |
| N        | -0.620312 | -0.405314 | 0.891435  | C | 1.636620  | -1.687423 | -0.998502 |
| C        | -2.182446 | -1.697847 | 2.196329  | H | 0.785157  | -2.320965 | -1.246710 |
| C        | -1.094078 | -0.646941 | 2.155327  | C | 1.589232  | -0.765799 | 0.070967  |
| H        | -1.813793 | -2.563093 | 1.622052  | C | 0.592994  | -0.366746 | 1.047548  |
| H        | -2.314417 | -1.996075 | 3.246956  | C | 1.190496  | 0.603077  | 1.826827  |
| O        | -0.669837 | -0.051078 | 3.138968  | H | 0.784769  | 1.166396  | 2.664040  |
| C        | -3.131723 | 0.787312  | 0.002603  | C | -0.835527 | -0.837072 | 1.166049  |
| C        | -3.175192 | 1.696019  | 1.078027  | C | -1.423144 | -0.644716 | 2.599710  |
| C        | -2.786895 | 1.300489  | -1.266181 | H | -2.128266 | -1.452704 | 2.836225  |
| C        | -2.906253 | 3.054845  | 0.895536  | H | -0.691236 | -0.563605 | 3.415117  |
| H        | -3.411814 | 1.347364  | 2.082965  | C | -2.125893 | 0.645737  | 2.134464  |
| C        | -2.524435 | 2.654413  | -1.449350 | H | -1.547409 | 1.548942  | 2.371662  |
| H        | -2.691557 | 0.619727  | -2.108315 | H | -3.165179 | 0.800392  | 2.459373  |
| C        | -2.584775 | 3.546037  | -0.370732 | C | -1.932259 | 0.201000  | 0.658399  |
| H        | -2.950780 | 3.730870  | 1.753049  | C | -3.170759 | -0.570999 | 0.155852  |
| H        | -2.259201 | 3.017987  | -2.445280 | H | -3.634617 | -1.104417 | 1.001742  |
| H        | -2.381218 | 4.609658  | -0.517913 | H | -3.916863 | 0.148828  | -0.214349 |
| C        | -3.663069 | -2.914651 | -1.226683 | C | -2.802666 | -1.582118 | -0.921916 |
| C        | -3.456516 | -1.804007 | -2.266791 | H | -3.666393 | -2.183806 | -1.239833 |
| H        | -2.828480 | -3.603039 | -1.046406 | H | -2.430581 | -1.077812 | -1.828508 |
| H        | -4.654692 | -3.378825 | -1.157943 | C | -1.734986 | -2.562409 | -0.467906 |
| H        | -2.484059 | -1.747847 | -2.768035 | C | -1.523856 | 1.263753  | -0.336205 |
| H        | -4.314134 | -1.518968 | -2.888632 | C | -0.734542 | 0.972524  | -1.459655 |
|          |           |           |           | H | -0.348809 | -0.033290 | -1.611956 |
|          |           |           |           | C | -0.405811 | 1.966419  | -2.383828 |
|          |           |           |           | H | 0.221481  | 1.714283  | -3.242154 |
|          |           |           |           | C | -0.868026 | 3.273222  | -2.209116 |
|          |           |           |           | H | -0.609423 | 4.051224  | -2.931396 |
|          |           |           |           | C | -1.662906 | 3.575686  | -1.100846 |
|          |           |           |           | H | -2.033727 | 4.593054  | -0.952563 |
|          |           |           |           | C | -1.983479 | 2.579609  | -0.175056 |
|          |           |           |           | H | -2.604937 | 2.831900  | 0.687376  |
|          |           |           |           | C | 3.404481  | 1.793727  | 1.978333  |
|          |           |           |           | H | 4.307215  | 1.287854  | 2.359810  |
|          |           |           |           | H | 2.918119  | 2.314111  | 2.813837  |
|          |           |           |           | H | 3.716814  | 2.545556  | 1.234693  |
| 47       |           |           |           |   |           |           |           |
| <b>3</b> |           |           |           |   |           |           |           |
| O        | -1.560482 | -3.641419 | -1.010973 |   |           |           |           |
| N        | 2.479526  | 0.847618  | 1.401881  |   |           |           |           |
| N        | -0.968970 | -2.166641 | 0.595868  |   |           |           |           |
| H        | -0.255210 | -2.842525 | 0.853805  |   |           |           |           |

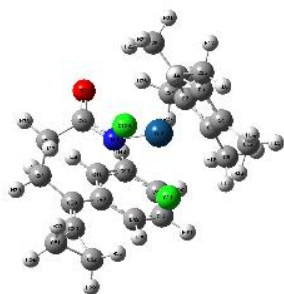

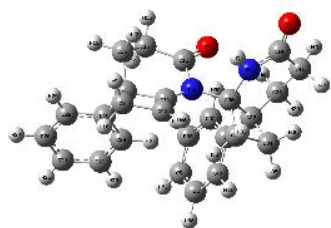

56

**4**

|   |           |           |           |
|---|-----------|-----------|-----------|
| O | -4.650699 | -2.193665 | -0.636778 |
| O | -1.311168 | -0.568152 | -2.095830 |
| N | -0.464637 | -0.882373 | -0.005761 |
| N | -2.762042 | -1.403557 | 0.307828  |
| H | -2.518379 | -2.379946 | 0.454304  |
| C | -1.047957 | 2.010647  | 0.136849  |
| C | 1.848467  | -1.958867 | 0.194853  |
| C | 1.960619  | -2.835957 | 1.506740  |
| H | 1.954907  | -3.922300 | 1.313338  |
| H | 2.822484  | -2.587099 | 2.145810  |
| C | 0.500706  | -1.552503 | 0.741176  |
| C | -0.404656 | -0.984049 | -1.399998 |
| C | 0.839627  | -1.615214 | -2.022403 |
| H | 1.511037  | -0.773665 | -2.267580 |
| H | 0.506196  | -2.038395 | -2.979787 |
| C | 1.591135  | -2.635617 | -1.156910 |
| H | 0.970724  | -3.534502 | -1.004148 |
| H | 2.519152  | -2.951089 | -1.657364 |
| C | 2.916351  | -0.885600 | 0.097859  |
| C | 2.633857  | 0.479633  | 0.231064  |
| H | 1.610191  | 0.815543  | 0.398860  |
| C | 3.659809  | 1.427189  | 0.143513  |
| H | 3.416269  | 2.485212  | 0.249521  |
| C | 4.977160  | 1.025152  | -0.079643 |
| H | 5.775710  | 1.767890  | -0.147043 |
| C | 5.268920  | -0.336351 | -0.215871 |
| H | 6.297570  | -0.663157 | -0.387378 |
| C | 4.245765  | -1.279832 | -0.127680 |
| H | 4.481635  | -2.343247 | -0.225700 |
| C | -1.721947 | -0.443849 | 0.613795  |
| C | -1.660234 | -0.150019 | 2.134737  |
| H | -1.983307 | -0.972443 | 2.786372  |
| H | -0.667084 | 0.197674  | 2.444048  |
| C | -2.642005 | 1.012166  | 1.898544  |
| H | -2.513031 | 1.926959  | 2.489540  |

|   |           |           |           |
|---|-----------|-----------|-----------|
| H | -3.683366 | 0.684277  | 2.004852  |
| C | -2.214163 | 1.052170  | 0.400592  |
| C | -3.336532 | 1.233423  | -0.625055 |
| H | -3.748636 | 2.250077  | -0.518126 |
| H | -2.914706 | 1.151416  | -1.631521 |
| C | -4.447173 | 0.195627  | -0.491340 |
| H | -5.091397 | 0.406053  | 0.380216  |
| H | -5.111198 | 0.205093  | -1.366361 |
| C | -3.971466 | -1.234534 | -0.321386 |
| C | 0.607425  | -2.253851 | 1.889516  |
| H | -0.049988 | -2.426182 | 2.741118  |
| C | -0.389475 | 2.697043  | 1.170810  |
| H | -0.686187 | 2.550596  | 2.208330  |
| C | 0.652178  | 3.592190  | 0.909688  |
| H | 1.134662  | 4.111027  | 1.741478  |
| C | 1.070591  | 3.822767  | -0.400403 |
| H | 1.879882  | 4.526324  | -0.609214 |
| C | 0.441844  | 3.136430  | -1.441488 |
| H | 0.761479  | 3.294445  | -2.474274 |
| C | -0.600751 | 2.247660  | -1.176608 |
| H | -1.061515 | 1.720375  | -2.008586 |

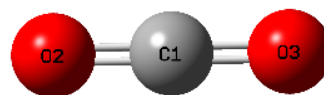

3

**CO<sub>2</sub>**

|   |          |          |           |
|---|----------|----------|-----------|
| C | 0.000000 | 0.000000 | 0.000000  |
| O | 0.000000 | 0.000000 | 1.258400  |
| O | 0.000000 | 0.000000 | -1.258400 |

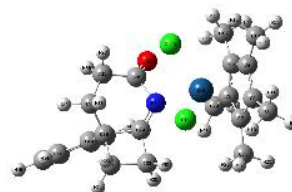

56

**IM2**

|    |           |           |           |
|----|-----------|-----------|-----------|
| Cl | -1.174963 | -2.538841 | -0.279436 |
| Ir | -1.394100 | -0.119738 | -0.088010 |

|    |           |           |           |
|----|-----------|-----------|-----------|
| C  | -3.235057 | -0.215385 | 1.093411  |
| C  | -3.388599 | 0.759893  | 0.057468  |
| C  | -2.362575 | 1.785669  | 0.239188  |
| C  | -1.596984 | 1.426830  | 1.406426  |
| C  | -2.105438 | 0.172791  | 1.928812  |
| C  | -4.055781 | -1.445224 | 1.306306  |
| H  | -4.640994 | -1.355508 | 2.236538  |
| H  | -3.407184 | -2.330441 | 1.376281  |
| H  | -4.750520 | -1.611733 | 0.473411  |
| C  | -4.400259 | 0.769108  | -1.041687 |
| H  | -4.951459 | -0.178918 | -1.087448 |
| H  | -3.904231 | 0.913754  | -2.012473 |
| H  | -5.124411 | 1.586888  | -0.889863 |
| C  | -2.204526 | 3.001342  | -0.614356 |
| H  | -2.947113 | 3.772141  | -0.344915 |
| H  | -2.338416 | 2.739610  | -1.673306 |
| H  | -1.198299 | 3.426072  | -0.512509 |
| C  | -0.453803 | 2.210891  | 1.967177  |
| H  | -0.824131 | 2.982969  | 2.662365  |
| H  | 0.109655  | 2.701862  | 1.162977  |
| H  | 0.237595  | 1.561935  | 2.522929  |
| C  | -1.661543 | -0.546144 | 3.162178  |
| H  | -2.285107 | -0.274938 | 4.032184  |
| H  | -0.617817 | -0.306366 | 3.409981  |
| H  | -1.730184 | -1.633736 | 3.019605  |
| Cl | -1.277616 | -0.013263 | -2.532404 |
| C  | 1.606857  | -0.784219 | 0.250790  |
| C  | 2.975214  | -1.081173 | -0.333524 |
| C  | 2.788076  | -1.056671 | -1.864385 |
| H  | 3.732999  | -1.262197 | -2.389351 |
| H  | 2.069564  | -1.845042 | -2.135475 |
| N  | 0.712852  | -0.032861 | -0.275679 |
| C  | 2.222678  | 0.312028  | -2.270438 |
| C  | 1.252895  | 0.902623  | -1.262350 |
| H  | 1.649550  | 0.240628  | -3.207971 |
| H  | 3.010825  | 1.065708  | -2.415244 |
| O  | 0.981540  | 2.069507  | -1.183658 |
| C  | 4.122474  | -0.211996 | 0.140970  |
| C  | 5.440956  | -0.639132 | -0.082774 |
| C  | 3.912828  | 1.014780  | 0.784771  |
| C  | 6.522593  | 0.141882  | 0.323725  |
| H  | 5.619832  | -1.596309 | -0.579962 |
| C  | 4.996510  | 1.799491  | 1.193202  |
| H  | 2.896980  | 1.371552  | 0.966177  |

|   |          |           |           |
|---|----------|-----------|-----------|
| C | 6.303094 | 1.366576  | 0.964123  |
| H | 7.542294 | -0.205709 | 0.141327  |
| H | 4.813751 | 2.754511  | 1.691298  |
| H | 7.149508 | 1.979379  | 1.282496  |
| C | 2.858264 | -2.463325 | 0.415072  |
| C | 1.645379 | -1.909879 | 1.233321  |
| H | 2.553078 | -3.270585 | -0.263473 |
| H | 3.740266 | -2.762471 | 0.994260  |
| H | 0.729567 | -2.507602 | 1.309705  |
| H | 1.962145 | -1.540439 | 2.222946  |

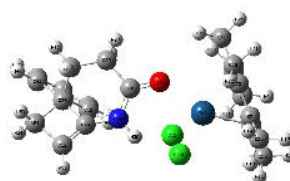

56

**IM2''**

|    |           |           |           |
|----|-----------|-----------|-----------|
| Cl | -0.032147 | 1.200385  | -1.422099 |
| Ir | 1.593072  | -0.029681 | -0.106103 |
| C  | 2.778046  | 1.732386  | 0.340437  |
| C  | 3.422520  | 0.875023  | -0.651843 |
| C  | 3.720655  | -0.394546 | -0.007683 |
| C  | 3.183601  | -0.362233 | 1.324821  |
| C  | 2.599201  | 0.961774  | 1.535248  |
| C  | 2.364949  | 3.146404  | 0.096552  |
| H  | 3.252444  | 3.779111  | -0.069157 |
| H  | 1.804013  | 3.553725  | 0.947725  |
| H  | 1.714023  | 3.204929  | -0.788197 |
| C  | 3.825469  | 1.297237  | -2.027503 |
| H  | 3.061474  | 1.953863  | -2.465514 |
| H  | 3.933847  | 0.426867  | -2.688329 |
| H  | 4.786212  | 1.840595  | -2.009880 |
| C  | 4.436734  | -1.535056 | -0.651437 |
| H  | 5.525133  | -1.357137 | -0.623594 |
| H  | 4.125127  | -1.652000 | -1.697544 |
| H  | 4.224246  | -2.481915 | -0.139540 |
| C  | 3.239293  | -1.447259 | 2.350818  |
| H  | 4.079315  | -1.289270 | 3.049316  |
| H  | 3.365363  | -2.431620 | 1.880792  |
| H  | 2.310393  | -1.474032 | 2.937547  |
| C  | 1.923339  | 1.389131  | 2.797208  |
| H  | 2.653704  | 1.484136  | 3.617919  |

|    |           |           |           |    |           |           |           |
|----|-----------|-----------|-----------|----|-----------|-----------|-----------|
| H  | 1.165615  | 0.648358  | 3.091425  | C  | -2.657776 | 1.932106  | 0.044637  |
| H  | 1.415354  | 2.354137  | 2.672580  | C  | -2.550638 | 1.366881  | 1.356674  |
| Cl | 1.186027  | -2.005825 | -1.472833 | C  | -3.379969 | 0.177555  | 1.408638  |
| C  | -2.944858 | -1.727338 | -0.600150 | C  | -5.167298 | -0.900277 | -0.164481 |
| C  | -4.086159 | -1.198257 | 0.225083  | H  | -5.438427 | -0.879278 | -1.227720 |
| C  | -3.711533 | -1.464822 | 1.691608  | H  | -6.071679 | -0.690639 | 0.431384  |
| H  | -4.471940 | -1.101272 | 2.399403  | H  | -4.812447 | -1.914203 | 0.065277  |
| H  | -3.598148 | -2.550584 | 1.847057  | C  | -4.151590 | 1.484036  | -2.065099 |
| N  | -1.622648 | -1.451694 | -0.303395 | H  | -4.585836 | 0.599789  | -2.549874 |
| C  | -2.372385 | -0.749319 | 1.951031  | H  | -3.334383 | 1.840380  | -2.704629 |
| C  | -1.290341 | -0.941912 | 0.896906  | H  | -4.927809 | 2.267098  | -2.011385 |
| H  | -1.922532 | -1.042935 | 2.911027  | C  | -1.989755 | 3.165431  | -0.472352 |
| H  | -2.529393 | 0.341374  | 2.006169  | H  | -2.689120 | 4.019449  | -0.485662 |
| O  | -0.121295 | -0.612153 | 1.185710  | H  | -1.628775 | 2.997766  | -1.497358 |
| C  | -4.476491 | 0.252359  | 0.005484  | H  | -1.123963 | 3.440293  | 0.144718  |
| C  | -5.713410 | 0.706655  | 0.491036  | C  | -1.860875 | 1.973628  | 2.534985  |
| C  | -3.632051 | 1.162110  | -0.644976 | H  | -1.239952 | 2.831774  | 2.247336  |
| C  | -6.099425 | 2.038007  | 0.330628  | H  | -1.250426 | 1.220709  | 3.046410  |
| H  | -6.384678 | 0.005322  | 0.995378  | H  | -2.628641 | 2.342188  | 3.237588  |
| C  | -4.015338 | 2.498564  | -0.799160 | C  | -3.654302 | -0.665509 | 2.609823  |
| H  | -2.659804 | 0.848793  | -1.029248 | H  | -2.736200 | -0.799500 | 3.193395  |
| C  | -5.247352 | 2.941256  | -0.314763 | H  | -4.009941 | -1.659670 | 2.306174  |
| H  | -7.068636 | 2.372871  | 0.709019  | H  | -4.432449 | -0.200324 | 3.241865  |
| H  | -3.333956 | 3.190089  | -1.300484 | Cl | -1.064764 | 0.351912  | -2.521368 |
| H  | -5.546157 | 3.985118  | -0.438412 | O  | -0.628830 | -0.743803 | 2.653887  |
| C  | -4.961918 | -2.236269 | -0.589595 | N  | 3.556832  | 1.268115  | -1.662139 |
| C  | -3.679598 | -2.571899 | -1.346076 | N  | -0.002766 | -0.851871 | 0.461726  |
| H  | -5.358057 | -3.062491 | 0.025643  | C  | 3.075876  | 2.010336  | -0.561574 |
| H  | -5.787828 | -1.782515 | -1.159948 | C  | 3.644523  | 3.123230  | 0.054692  |
| H  | -3.443651 | -3.291646 | -2.130713 | H  | 4.572527  | 3.572254  | -0.301924 |
| H  | -0.842786 | -1.666813 | -0.950663 | C  | 2.974608  | 3.630945  | 1.169363  |

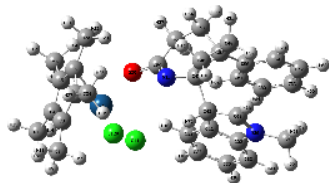

75

**IM3**

|    |           |           |           |   |           |           |           |
|----|-----------|-----------|-----------|---|-----------|-----------|-----------|
| Cl | -2.311018 | -2.500629 | -0.659044 | H | 3.382259  | 4.499199  | 1.691457  |
| Ir | -1.957416 | -0.132707 | -0.189098 | C | 1.785654  | 3.036454  | 1.629589  |
| C  | -4.111695 | 0.107358  | 0.149637  | H | 1.288698  | 3.449339  | 2.510357  |
| C  | -3.655767 | 1.159895  | -0.693653 | C | 1.227941  | 1.926577  | 0.990733  |
|    |           |           |           | H | 0.320662  | 1.454331  | 1.353274  |
|    |           |           |           | C | 1.887846  | 1.399776  | -0.120337 |
|    |           |           |           | C | 1.596148  | 0.252487  | -1.024593 |
|    |           |           |           | C | 2.740547  | 0.256040  | -1.914980 |
|    |           |           |           | H | 2.940102  | -0.422448 | -2.741615 |
|    |           |           |           | C | 1.061147  | -1.134652 | -0.468276 |
|    |           |           |           | C | 0.823470  | -2.109024 | -1.660645 |
|    |           |           |           | H | -0.042332 | -2.747294 | -1.458069 |
|    |           |           |           | H | 0.659284  | -1.640190 | -2.638298 |

|   |          |           |           |
|---|----------|-----------|-----------|
| C | 2.182518 | -2.780288 | -1.406105 |
| H | 2.969027 | -2.459236 | -2.103111 |
| H | 2.195265 | -3.879733 | -1.379864 |
| C | 2.255617 | -2.094575 | -0.016846 |
| C | 1.712811 | -3.043965 | 1.060276  |
| H | 0.918420 | -3.659108 | 0.609641  |
| H | 2.510011 | -3.727772 | 1.393620  |
| C | 1.113825 | -2.260217 | 2.208660  |
| H | 0.552448 | -2.915978 | 2.890231  |
| H | 1.881619 | -1.778033 | 2.832256  |
| C | 0.099154 | -1.203150 | 1.767877  |
| C | 3.575515 | -1.466831 | 0.377572  |
| C | 3.662677 | -0.476102 | 1.373113  |
| H | 2.764443 | -0.138684 | 1.882305  |
| C | 4.883602 | 0.113471  | 1.706140  |
| H | 4.909962 | 0.892482  | 2.471347  |
| C | 6.058228 | -0.279860 | 1.060298  |
| H | 7.014213 | 0.180483  | 1.321764  |
| C | 5.997768 | -1.281861 | 0.087412  |
| H | 6.910038 | -1.617886 | -0.412423 |
| C | 4.772392 | -1.865873 | -0.244599 |
| H | 4.748286 | -2.653005 | -0.999953 |
| C | 4.813307 | 1.545940  | -2.335681 |
| H | 4.934280 | 0.853411  | -3.177173 |
| H | 5.642849 | 1.404215  | -1.627684 |
| H | 4.819602 | 2.580048  | -2.709180 |
| H | 0.686815 | 0.521362  | -1.690507 |

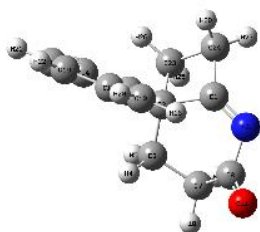

28

**IM4'**

|   |           |           |           |
|---|-----------|-----------|-----------|
| C | -1.210150 | 0.587547  | -0.915040 |
| C | -0.315268 | 0.747127  | 0.309278  |
| C | -0.982700 | 0.186970  | 1.594567  |
| H | -0.384998 | -0.660626 | 1.958127  |
| H | -0.970369 | 0.950213  | 2.388511  |
| N | -2.214066 | -0.172263 | -1.074211 |
| C | -2.427677 | -0.308466 | 1.346539  |
| C | -2.501541 | -1.037598 | 0.004696  |

|   |           |           |           |
|---|-----------|-----------|-----------|
| H | -3.123472 | 0.545693  | 1.309008  |
| H | -2.753734 | -0.988469 | 2.144509  |
| O | -2.788319 | -2.201446 | -0.132700 |
| C | 1.078681  | 0.170861  | 0.117292  |
| C | 1.274145  | -0.992017 | -0.642041 |
| C | 2.183750  | 0.755418  | 0.752436  |
| C | 2.547893  | -1.552858 | -0.769498 |
| H | 0.421985  | -1.467227 | -1.134123 |
| C | 3.456519  | 0.194227  | 0.628469  |
| H | 2.049054  | 1.656550  | 1.355910  |
| C | 3.643286  | -0.961176 | -0.136066 |
| H | 2.682533  | -2.456660 | -1.368477 |
| H | 4.306701  | 0.662096  | 1.130886  |
| H | 4.639323  | -1.398503 | -0.236712 |
| C | -0.386264 | 2.282344  | -0.035115 |
| C | -0.830560 | 1.924560  | -1.492804 |
| H | -1.190665 | 2.782329  | 0.522909  |
| H | 0.547845  | 2.848015  | 0.069949  |
| H | -1.636385 | 2.500981  | -1.968070 |
| H | 0.036511  | 1.861383  | -2.167638 |

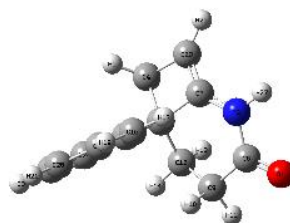

28

**IM4''**

|   |           |           |           |
|---|-----------|-----------|-----------|
| O | -3.059150 | -2.127495 | 0.012869  |
| N | -2.117833 | -0.293289 | -0.932948 |
| C | -0.295080 | 0.955497  | 0.297448  |
| C | -0.273105 | 2.490468  | -0.093650 |
| H | -0.666488 | 3.151764  | 0.697593  |
| H | 0.713056  | 2.861554  | -0.415916 |
| C | -1.339747 | 0.837418  | -0.782143 |
| C | -2.284494 | -1.200013 | 0.112341  |
| C | -1.439898 | -0.960727 | 1.368010  |
| H | -0.569043 | -1.633321 | 1.282533  |
| H | -2.040804 | -1.339390 | 2.206667  |
| C | -0.955767 | 0.482708  | 1.600967  |
| H | -1.812313 | 1.137797  | 1.832028  |
| H | -0.269934 | 0.515990  | 2.461253  |
| C | 1.030254  | 0.255952  | 0.054080  |

|   |           |           |           |
|---|-----------|-----------|-----------|
| C | 1.216449  | -0.663384 | -0.986366 |
| H | 0.386171  | -0.899581 | -1.653849 |
| C | 2.454429  | -1.286654 | -1.175962 |
| H | 2.579139  | -2.003147 | -1.991596 |
| C | 3.525485  | -0.997099 | -0.329059 |
| H | 4.492417  | -1.483513 | -0.477673 |
| C | 3.352019  | -0.077734 | 0.711036  |
| H | 4.185501  | 0.160098  | 1.376683  |
| C | 2.115341  | 0.539927  | 0.899140  |
| C | -1.285300 | 2.125087  | -1.174591 |
| H | -1.826659 | 2.716626  | -1.914391 |
| H | -2.786271 | -0.382460 | -1.693942 |
| H | 1.989729  | 1.261898  | 1.710789  |

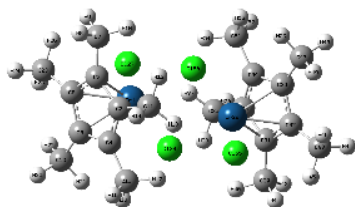

56

**Ir2**

|    |          |           |           |
|----|----------|-----------|-----------|
| Ir | 1.840611 | -0.209077 | 0.000028  |
| C  | 3.525699 | 0.380805  | 1.171734  |
| C  | 2.829130 | 1.584901  | 0.715182  |
| C  | 2.828572 | 1.585770  | -0.713840 |
| C  | 3.524838 | 0.382225  | -1.172326 |
| C  | 3.986723 | -0.331543 | -0.000929 |
| C  | 3.784397 | 0.012514  | 2.596305  |
| H  | 4.671466 | 0.542316  | 2.984376  |
| H  | 3.955892 | -1.067151 | 2.698761  |
| H  | 2.925381 | 0.275537  | 3.228679  |
| C  | 2.198173 | 2.627218  | 1.579797  |
| H  | 1.996296 | 2.239088  | 2.585904  |
| H  | 1.237321 | 2.954988  | 1.157571  |
| H  | 2.866605 | 3.500503  | 1.670446  |
| C  | 2.197035 | 2.629115  | -1.576800 |
| H  | 2.865022 | 3.502869  | -1.666185 |
| H  | 1.236027 | 2.955765  | -1.154042 |
| H  | 1.995277 | 2.242412  | -2.583480 |
| C  | 3.782128 | 0.015635  | -2.597592 |
| H  | 4.668144 | 0.546780  | -2.986221 |
| H  | 2.922031 | 0.278415  | -3.228598 |
| H  | 3.954620 | -1.063740 | -2.701386 |

|    |           |           |           |
|----|-----------|-----------|-----------|
| C  | 4.775777  | -1.598435 | -0.001879 |
| H  | 5.855538  | -1.371687 | -0.000869 |
| H  | 4.544866  | -2.206134 | -0.885920 |
| H  | 4.543603  | -2.208179 | 0.880428  |
| Cl | 1.433973  | -2.586203 | -0.000204 |
| Cl | 0.000007  | 0.000119  | -1.682729 |
| Ir | -1.840616 | 0.209093  | -0.000104 |
| C  | -2.829260 | -1.584750 | -0.715382 |
| C  | -3.525973 | -0.380573 | -1.171508 |
| C  | -3.986730 | 0.331493  | 0.001454  |
| C  | -3.524534 | -0.382529 | 1.172552  |
| C  | -2.828342 | -1.585951 | 0.713638  |
| C  | -2.198454 | -2.626859 | -1.580355 |
| H  | -2.866968 | -3.500060 | -1.671210 |
| H  | -1.237607 | -2.954833 | -1.158283 |
| H  | -1.996614 | -2.238453 | -2.586364 |
| C  | -3.785084 | -0.012007 | -2.595933 |
| H  | -2.926396 | -0.275244 | -3.228661 |
| H  | -3.956223 | 1.067734  | -2.698192 |
| H  | -4.672482 | -0.541443 | -2.983751 |
| C  | -4.775822 | 1.598362  | 0.002997  |
| H  | -5.855576 | 1.371580  | 0.003891  |
| H  | -4.545143 | 2.207634  | -0.880022 |
| H  | -4.543451 | 2.206549  | 0.886326  |
| C  | -3.781425 | -0.016232 | 2.597966  |
| H  | -4.667045 | -0.547836 | 2.986869  |
| H  | -3.954384 | 1.063048  | 2.701954  |
| H  | -2.920957 | -0.278699 | 3.228602  |
| C  | -2.196582 | -2.629484 | 1.576213  |
| H  | -2.864331 | -3.503463 | 1.665176  |
| H  | -1.995020 | -2.243147 | 2.583071  |
| H  | -1.235445 | -2.955694 | 1.153401  |
| Cl | -1.434065 | 2.586234  | -0.000034 |
| Cl | -0.000014 | -0.000076 | 1.682718  |

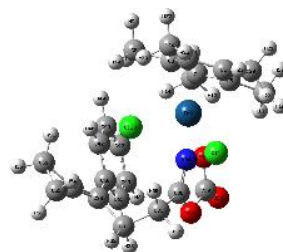

59

**IrD**

|    |          |           |           |
|----|----------|-----------|-----------|
| Cl | 1.555144 | -0.593506 | -2.544904 |
|----|----------|-----------|-----------|



|    |           |           |           |
|----|-----------|-----------|-----------|
| H  | -4.451094 | -0.999502 | -0.220565 |
| H  | -5.102977 | 0.450199  | 0.577420  |
| C  | -3.222785 | 2.488654  | 1.221698  |
| H  | -4.243239 | 2.381167  | 0.833839  |
| H  | -2.658167 | 3.122569  | 0.522142  |
| H  | -3.268870 | 3.003368  | 2.195449  |
| Cl | -1.181045 | 2.106547  | -1.384380 |
| C  | 2.629957  | 2.529563  | -0.858134 |
| C  | 2.987211  | 1.240055  | -0.863267 |
| C  | 2.983763  | 0.534536  | -2.209053 |
| H  | 3.295873  | 1.256577  | -2.978315 |
| H  | 3.708582  | -0.290924 | -2.239873 |
| N  | 0.244621  | -0.822603 | -0.856964 |
| C  | 1.592150  | 0.025382  | -2.627967 |
| C  | 1.110075  | -1.121024 | -1.758797 |
| H  | 1.619731  | -0.382576 | -3.650822 |
| H  | 0.860615  | 0.842310  | -2.594501 |
| O  | 1.686020  | -2.260641 | -1.923371 |
| C  | 3.335079  | 0.497530  | 0.373493  |
| C  | 3.559736  | -0.892442 | 0.362063  |
| C  | 3.456938  | 1.162732  | 1.613449  |
| C  | 3.866508  | -1.591331 | 1.532084  |
| H  | 3.493607  | -1.456306 | -0.566342 |
| C  | 3.776405  | 0.468574  | 2.778924  |
| H  | 3.313461  | 2.241666  | 1.656242  |
| C  | 3.977956  | -0.916659 | 2.748384  |
| H  | 4.013760  | -2.672570 | 1.480005  |
| H  | 3.870723  | 1.014141  | 3.721389  |
| H  | 4.222712  | -1.460371 | 3.663657  |
| C  | 2.201259  | 3.663724  | -1.680312 |
| C  | 2.352398  | 3.783965  | -0.157871 |
| H  | 2.939544  | 4.172916  | -2.312077 |
| H  | 1.182848  | 3.650576  | -2.083801 |
| H  | 3.193257  | 4.370762  | 0.231961  |
| H  | 1.438272  | 3.861453  | 0.440382  |
| O  | 0.416485  | -2.924134 | -0.112910 |
| O  | 2.054581  | -4.312223 | -0.890262 |
| C  | 1.339394  | -3.364352 | -0.804851 |

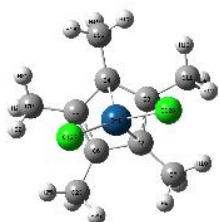

|           |           |           |           |
|-----------|-----------|-----------|-----------|
| 28        |           |           |           |
| <b>Ir</b> |           |           |           |
| Ir        | -0.012149 | 0.418191  | -0.007978 |
| C         | 0.683204  | -1.315496 | 1.042669  |
| C         | 1.246834  | -1.354332 | -0.275344 |
| C         | 0.136907  | -1.337542 | -1.209104 |
| C         | -1.114117 | -1.406974 | -0.463483 |
| C         | -0.779208 | -1.362179 | 0.926775  |
| C         | 1.451661  | -1.285235 | 2.322043  |
| H         | 1.601594  | -2.310725 | 2.701987  |
| H         | 0.917309  | -0.713125 | 3.092837  |
| H         | 2.436900  | -0.823002 | 2.178859  |
| C         | 2.705336  | -1.337967 | -0.603764 |
| H         | 3.215315  | -0.524943 | -0.066256 |
| H         | 2.868880  | -1.171335 | -1.676367 |
| H         | 3.179464  | -2.294919 | -0.330080 |
| C         | 0.254138  | -1.320504 | -2.697073 |
| H         | 0.292428  | -2.352131 | -3.087730 |
| H         | 1.165176  | -0.798022 | -3.016885 |
| H         | -0.605256 | -0.813870 | -3.155843 |
| C         | -2.493186 | -1.462398 | -1.036433 |
| H         | -2.888770 | -2.491552 | -1.007767 |
| H         | -2.502298 | -1.122383 | -2.080310 |
| H         | -3.174496 | -0.808596 | -0.474544 |
| C         | -1.739366 | -1.385678 | 2.069731  |
| H         | -1.903332 | -2.421720 | 2.412958  |
| H         | -2.708757 | -0.960444 | 1.779470  |
| H         | -1.357619 | -0.803026 | 2.919281  |
| Cl        | -1.717146 | 2.007108  | 0.005304  |
| Cl        | 1.616306  | 2.088123  | -0.007154 |

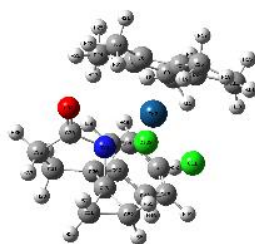

|            |           |           |           |
|------------|-----------|-----------|-----------|
| 56         |           |           |           |
| <b>IrZ</b> |           |           |           |
| Cl         | 0.334526  | -1.009965 | -2.130326 |
| Ir         | -0.871203 | -0.105638 | -0.222203 |
| C          | -0.946708 | -1.864644 | 1.048514  |
| C          | -1.944386 | -1.986866 | -0.000701 |
| C          | -2.862142 | -0.892644 | 0.117481  |



|   |           |           |           |    |           |           |           |
|---|-----------|-----------|-----------|----|-----------|-----------|-----------|
| C | -0.880203 | 1.562965  | 1.163720  | H  | -4.980986 | -0.830243 | -0.186648 |
| H | -1.870228 | 1.962765  | 1.429961  | H  | -4.038704 | -1.215005 | -1.653727 |
| H | -0.149034 | 2.207954  | 1.673498  | H  | -4.060897 | 0.448434  | -1.039813 |
| C | -0.727755 | 1.906290  | -0.336902 | C  | -3.241450 | 1.090545  | 1.767699  |
| C | -2.735676 | -0.388279 | 0.211345  | H  | -4.228376 | 0.767625  | 2.141123  |
| C | -3.595692 | -0.761597 | 1.262216  | H  | -3.394638 | 1.814123  | 0.954048  |
| H | -3.177168 | -1.236795 | 2.152688  | H  | -2.713700 | 1.612471  | 2.573331  |
| C | -4.972384 | -0.554970 | 1.193977  | C  | -0.569154 | -0.252577 | 3.062667  |
| H | -5.607056 | -0.856664 | 2.030981  | H  | -0.875354 | -0.868577 | 3.925020  |
| C | -5.537233 | 0.032401  | 0.057868  | H  | -0.784035 | 0.796802  | 3.295720  |
| H | -6.615095 | 0.200486  | -0.001542 | H  | 0.517597  | -0.366863 | 2.944568  |
| C | -4.704233 | 0.397199  | -0.998180 | Cl | -1.674501 | 1.773573  | -1.570420 |
| H | -5.125747 | 0.855984  | -1.895941 | C  | 1.676157  | 1.819547  | -0.885130 |
| C | -3.321573 | 0.190001  | -0.923853 | C  | 2.325907  | 1.136190  | 0.225434  |
| H | -2.700328 | 0.500106  | -1.759884 | C  | 2.873388  | 2.083782  | 1.295131  |
| C | 4.218087  | -2.727143 | 0.066316  | H  | 3.149443  | 1.522183  | 2.197103  |
| H | 5.034872  | -2.601132 | -0.663844 | H  | 3.788034  | 2.567968  | 0.921515  |
| H | 3.739557  | -3.699301 | -0.110845 | N  | 0.771026  | 1.319125  | 0.174083  |
| H | 4.657230  | -2.733644 | 1.077739  | C  | 1.742782  | 3.066844  | 1.592590  |

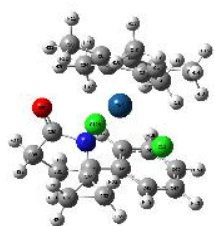

56

**TS1\_pdt**

|    |           |           |           |   |          |           |           |
|----|-----------|-----------|-----------|---|----------|-----------|-----------|
| Cl | 0.333246  | -1.009592 | -2.131180 | C | 3.868147 | -2.096879 | -1.056777 |
| Ir | -0.871205 | -0.105354 | -0.222008 | H | 3.149745 | -0.285060 | -1.969474 |
| C  | -0.947051 | -1.865525 | 1.046787  | C | 4.035853 | -2.812481 | 0.130341  |
| C  | -1.945795 | -1.986016 | -0.001697 | H | 3.759289 | -2.796963 | 2.277169  |
| C  | -2.862719 | -0.891377 | 0.118550  | H | 4.169897 | -2.536286 | -2.009913 |
| C  | -2.467440 | -0.084755 | 1.267128  | H | 4.477864 | -3.811560 | 0.112225  |
| C  | -1.292699 | -0.698714 | 1.832724  | C | 1.724063 | 3.152910  | -1.542061 |
| C  | 0.126899  | -2.869488 | 1.314734  | C | 1.571530 | 1.878310  | -2.353872 |
| H  | -0.306260 | -3.824013 | 1.660955  | H | 0.823188 | 3.767179  | -1.453856 |
| H  | 0.824233  | -2.515860 | 2.083215  | H | 2.676064 | 3.693818  | -1.550134 |
| H  | 0.711306  | -3.066526 | 0.404718  | H | 0.587553 | 1.671418  | -2.776636 |
| C  | -1.993359 | -3.094915 | -0.999494 | H | 2.427144 | 1.517350  | -2.929309 |
| H  | -0.996143 | -3.276438 | -1.421853 |   |          |           |           |
| H  | -2.664985 | -2.855440 | -1.833595 |   |          |           |           |
| H  | -2.353827 | -4.017512 | -0.513380 |   |          |           |           |
| C  | -4.052162 | -0.608576 | -0.739029 |   |          |           |           |

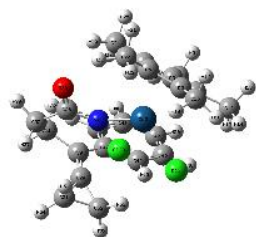

56

**TS1**

|    |           |           |           |
|----|-----------|-----------|-----------|
| Cl | 0.431147  | 0.888818  | -2.387996 |
| Ir | 0.904554  | -0.000873 | -0.196922 |
| C  | 0.928097  | 1.838828  | 1.137776  |
| C  | 1.957806  | 2.012680  | 0.136454  |
| C  | 2.879763  | 0.921428  | 0.222733  |
| C  | 2.450510  | 0.069305  | 1.330814  |
| C  | 1.267192  | 0.671415  | 1.905287  |
| C  | -0.207197 | 2.771911  | 1.403726  |
| H  | 0.090046  | 3.554300  | 2.123984  |
| H  | -1.073873 | 2.238375  | 1.816020  |
| H  | -0.538850 | 3.265262  | 0.481634  |
| C  | 2.024943  | 3.161824  | -0.809961 |
| H  | 1.030466  | 3.409654  | -1.202044 |
| H  | 2.673644  | 2.944967  | -1.666444 |
| H  | 2.423438  | 4.042567  | -0.277274 |
| C  | 4.090550  | 0.683189  | -0.619089 |
| H  | 5.010994  | 0.919537  | -0.059745 |
| H  | 4.067278  | 1.298079  | -1.527791 |
| H  | 4.129764  | -0.369719 | -0.933424 |
| C  | 3.189629  | -1.117358 | 1.849879  |
| H  | 3.825992  | -0.822503 | 2.702020  |
| H  | 3.827578  | -1.546234 | 1.067175  |
| H  | 2.477747  | -1.891960 | 2.162003  |
| C  | 0.525475  | 0.200482  | 3.110727  |
| H  | 0.812539  | 0.818377  | 3.978398  |
| H  | 0.741718  | -0.851441 | 3.324231  |
| H  | -0.558378 | 0.304654  | 2.963799  |
| Cl | 1.695672  | -1.954603 | -1.350811 |
| C  | -2.284302 | -1.688803 | -1.161246 |
| C  | -2.806502 | -1.124036 | -0.040688 |
| C  | -3.012839 | -2.005754 | 1.173019  |
| H  | -3.059358 | -1.380088 | 2.075400  |
| H  | -3.978438 | -2.538246 | 1.108898  |
| N  | -0.467081 | -1.134621 | 0.486114  |
| C  | -1.855084 | -2.987394 | 1.318938  |

|   |           |           |           |
|---|-----------|-----------|-----------|
| C | -0.509735 | -2.280362 | 1.202342  |
| H | -1.892169 | -3.777060 | 0.554571  |
| H | -1.860832 | -3.490922 | 2.295843  |
| O | 0.466336  | -2.677303 | 1.847053  |
| C | -3.193863 | 0.299183  | 0.007695  |
| C | -4.057800 | 0.787119  | 1.009076  |
| C | -2.684510 | 1.219032  | -0.930408 |
| C | -4.399765 | 2.139103  | 1.069202  |
| H | -4.483845 | 0.103688  | 1.744772  |
| C | -3.022661 | 2.569142  | -0.864455 |
| H | -1.983378 | 0.887348  | -1.691754 |
| C | -3.880962 | 3.039471  | 0.134224  |
| H | -5.078151 | 2.489974  | 1.850797  |
| H | -2.599012 | 3.259102  | -1.598526 |
| H | -4.144264 | 4.098783  | 0.184871  |
| C | -1.898736 | -2.921719 | -1.854004 |
| C | -1.962164 | -1.579952 | -2.580370 |
| H | -0.890836 | -3.312657 | -1.671968 |
| H | -2.669628 | -3.678673 | -2.042227 |
| H | -1.005764 | -1.128517 | -2.858831 |
| H | -2.789203 | -1.372709 | -3.270906 |

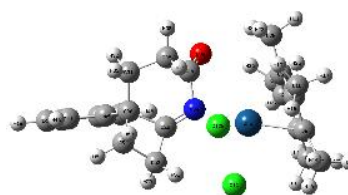

56

**TS2\_IM2**

|    |          |           |           |
|----|----------|-----------|-----------|
| Cl | 0.765061 | -0.891059 | -2.411369 |
| Ir | 1.331856 | -0.126930 | -0.178291 |
| C  | 2.863335 | 1.202943  | -1.023898 |
| C  | 3.449248 | -0.016746 | -0.483314 |
| C  | 3.198204 | -0.022434 | 0.941077  |
| C  | 2.410307 | 1.135240  | 1.273163  |
| C  | 2.204390 | 1.893234  | 0.042593  |
| C  | 2.977756 | 1.635401  | -2.447554 |
| H  | 4.026007 | 1.888610  | -2.678407 |
| H  | 2.355929 | 2.516198  | -2.652737 |
| H  | 2.650544 | 0.828326  | -3.118699 |
| C  | 4.250132 | -1.008252 | -1.264125 |
| H  | 3.777281 | -1.194632 | -2.238292 |
| H  | 4.309808 | -1.968710 | -0.735272 |

|    |           |           |           |
|----|-----------|-----------|-----------|
| H  | 5.277179  | -0.641761 | -1.433969 |
| C  | 3.689478  | -1.053373 | 1.902035  |
| H  | 4.712766  | -0.799273 | 2.227604  |
| H  | 3.699971  | -2.048520 | 1.440403  |
| H  | 3.044845  | -1.113152 | 2.787782  |
| C  | 2.048737  | 1.585737  | 2.651666  |
| H  | 2.863127  | 2.197882  | 3.077455  |
| H  | 1.891086  | 0.728729  | 3.321493  |
| H  | 1.134604  | 2.191886  | 2.651500  |
| C  | 1.516490  | 3.216043  | -0.050591 |
| H  | 2.182982  | 4.014327  | 0.319675  |
| H  | 0.598358  | 3.219965  | 0.548798  |
| H  | 1.247891  | 3.451135  | -1.088883 |
| Cl | 0.829072  | -2.328920 | 0.762558  |
| C  | -1.770231 | -0.616079 | -0.199332 |
| C  | -3.081475 | -0.861744 | 0.531576  |
| C  | -2.977805 | -0.650713 | 2.068787  |
| H  | -3.712611 | 0.104895  | 2.378631  |
| H  | -3.229981 | -1.586666 | 2.588928  |
| N  | -0.799272 | 0.121685  | 0.207179  |
| C  | -1.567835 | -0.177777 | 2.493990  |
| C  | -1.061515 | 0.791785  | 1.454012  |
| H  | -0.866696 | -1.028807 | 2.508403  |
| H  | -1.590705 | 0.313640  | 3.475223  |
| O  | -0.902004 | 1.977658  | 1.603915  |
| C  | -4.244089 | -0.074024 | -0.055390 |
| C  | -5.546694 | -0.588606 | 0.021717  |
| C  | -4.051022 | 1.193292  | -0.622277 |
| C  | -6.632083 | 0.145756  | -0.458745 |
| H  | -5.714849 | -1.573210 | 0.465006  |
| C  | -5.137184 | 1.927821  | -1.107427 |
| H  | -3.045608 | 1.615464  | -0.683872 |
| C  | -6.430143 | 1.406926  | -1.028254 |
| H  | -7.640452 | -0.269739 | -0.390927 |
| H  | -4.967864 | 2.911701  | -1.551252 |
| H  | -7.278577 | 1.979980  | -1.409310 |
| C  | -2.967029 | -2.313989 | -0.062315 |
| C  | -1.932956 | -1.795687 | -1.106296 |
| H  | -2.486256 | -2.995877 | 0.651558  |
| H  | -3.895578 | -2.750192 | -0.450703 |
| H  | -1.026107 | -2.373775 | -1.304202 |
| H  | -2.407450 | -1.506722 | -2.055917 |

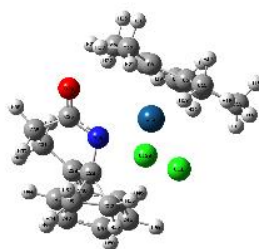

56

**TS2**

|    |           |           |           |
|----|-----------|-----------|-----------|
| Cl | 0.289903  | -2.037551 | -0.962522 |
| Ir | -1.137937 | -0.168308 | -0.170340 |
| C  | -1.656792 | -1.214958 | 1.660890  |
| C  | -2.561891 | -1.663873 | 0.609123  |
| C  | -3.289062 | -0.529459 | 0.141635  |
| C  | -2.860254 | 0.643061  | 0.891446  |
| C  | -1.875578 | 0.194267  | 1.857586  |
| C  | -0.755015 | -2.112421 | 2.444981  |
| H  | -1.333652 | -2.738643 | 3.145989  |
| H  | -0.027225 | -1.532815 | 3.029358  |
| H  | -0.196261 | -2.772695 | 1.765925  |
| C  | -2.700565 | -3.078744 | 0.152332  |
| H  | -1.712501 | -3.526221 | -0.020917 |
| H  | -3.262713 | -3.142006 | -0.788306 |
| H  | -3.233169 | -3.671667 | 0.915582  |
| C  | -4.332755 | -0.507224 | -0.925876 |
| H  | -5.317993 | -0.282177 | -0.484605 |
| H  | -4.395495 | -1.470739 | -1.447302 |
| H  | -4.094119 | 0.260398  | -1.675580 |
| C  | -3.513461 | 1.982247  | 0.796697  |
| H  | -4.442958 | 1.998540  | 1.393805  |
| H  | -3.775089 | 2.202878  | -0.247599 |
| H  | -2.836805 | 2.771307  | 1.137084  |
| C  | -1.258511 | 1.008985  | 2.947589  |
| H  | -1.806616 | 0.839067  | 3.890620  |
| H  | -1.278045 | 2.075606  | 2.703159  |
| H  | -0.211444 | 0.716168  | 3.113907  |
| Cl | -1.512107 | 0.617334  | -2.456180 |
| C  | 1.722678  | 0.961874  | -0.896215 |
| C  | 2.810455  | 0.992986  | 0.059541  |
| C  | 2.781280  | 2.180430  | 0.965072  |
| H  | 2.609581  | 1.822223  | 1.997699  |
| H  | 3.783559  | 2.642809  | 0.991810  |
| N  | 0.462515  | 1.238210  | -0.232901 |
| C  | 1.703997  | 3.178942  | 0.556547  |

|   |           |           |           |    |           |           |           |
|---|-----------|-----------|-----------|----|-----------|-----------|-----------|
| C | 0.363219  | 2.462811  | 0.353990  | H  | 5.619994  | -1.895313 | -1.243445 |
| H | 1.991697  | 3.677070  | -0.383220 | C  | 2.834910  | -3.222734 | 0.222387  |
| H | 1.555244  | 3.954464  | 1.317493  | H  | 3.742544  | -3.829875 | 0.377394  |
| O | -0.667550 | 2.976255  | 0.769977  | H  | 2.514446  | -3.322092 | -0.824154 |
| C | 3.841840  | -0.001863 | 0.174172  | H  | 2.035395  | -3.627251 | 0.856273  |
| C | 5.131390  | 0.320697  | 0.675510  | C  | 1.821956  | -1.596105 | 2.794682  |
| C | 3.561384  | -1.351655 | -0.166432 | H  | 1.256701  | -2.484182 | 2.484263  |
| C | 6.108382  | -0.658091 | 0.794023  | H  | 1.110675  | -0.845708 | 3.154598  |
| H | 5.375776  | 1.352524  | 0.930529  | H  | 2.483711  | -1.889382 | 3.628317  |
| C | 4.542823  | -2.326827 | -0.017837 | C  | 3.119786  | 1.331234  | 2.677145  |
| H | 2.548774  | -1.628297 | -0.477933 | H  | 2.153569  | 1.285556  | 3.193740  |
| C | 5.815965  | -1.986223 | 0.450527  | H  | 3.234849  | 2.338856  | 2.253327  |
| H | 7.104242  | -0.392311 | 1.154791  | H  | 3.917110  | 1.190860  | 3.428057  |
| H | 4.305883  | -3.364408 | -0.262452 | Cl | 1.086250  | -1.418359 | -1.986279 |
| H | 6.583996  | -2.756118 | 0.557353  | O  | 0.034769  | 0.940397  | 2.443183  |
| C | 2.080722  | 1.760778  | -2.216644 | N  | -4.532063 | -2.565755 | -0.986458 |
| C | 1.796081  | 0.309647  | -2.247026 | N  | 0.052448  | 0.834616  | 0.142249  |
| H | 1.272528  | 2.444487  | -2.492462 | C  | -3.770910 | -2.421792 | 0.155529  |
| H | 3.102472  | 2.127328  | -2.352902 | C  | -4.163263 | -2.378677 | 1.500269  |
| H | 0.829674  | 0.002500  | -2.648261 | H  | -5.210253 | -2.484045 | 1.792300  |
| H | 2.624050  | -0.375735 | -2.428744 | C  | -3.166917 | -2.182238 | 2.454033  |

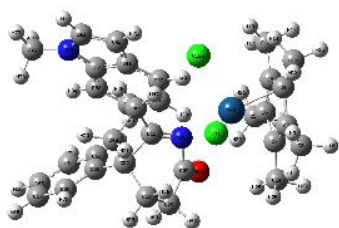

75

**TS3-SM**

|    |          |           |           |   |           |           |           |
|----|----------|-----------|-----------|---|-----------|-----------|-----------|
| Cl | 2.144291 | 1.878647  | -1.722422 | H | -3.438177 | -2.131578 | 3.511333  |
| Ir | 2.028711 | -0.039588 | -0.209148 | C | -1.812848 | -2.038149 | 2.079476  |
| C  | 4.068601 | 0.341655  | 0.453116  | H | -1.065516 | -1.858996 | 2.852697  |
| C  | 3.979635 | -0.922437 | -0.244285 | C | -1.420619 | -2.105609 | 0.745247  |
| C  | 3.120462 | -1.793786 | 0.544872  | H | -0.378414 | -1.981344 | 0.449944  |
| C  | 2.641436 | -1.053314 | 1.671107  | C | -2.405073 | -2.300423 | -0.241533 |
| C  | 3.220195 | 0.285256  | 1.614197  | C | -2.381456 | -2.389442 | -1.677627 |
| C  | 4.918022 | 1.497229  | 0.040541  | C | -3.685944 | -2.541660 | -2.084441 |
| H  | 4.937859 | 1.601952  | -1.051296 | H | -4.097526 | -2.643016 | -3.087459 |
| H  | 5.948409 | 1.345694  | 0.405496  | C | -0.810203 | 1.161099  | -0.760358 |
| H  | 4.537444 | 2.440711  | 0.451232  | C | -1.022955 | 0.906449  | -2.215079 |
| C  | 4.710545 | -1.319140 | -1.486300 | H | -0.128703 | 0.685558  | -2.805529 |
| H  | 5.006357 | -0.434830 | -2.066134 | H | -1.754047 | 0.091092  | -2.339029 |
| H  | 4.065025 | -1.934992 | -2.127483 | C | -1.694373 | 2.309384  | -2.301005 |
|    |          |           |           | H | -2.674452 | 2.347489  | -2.791843 |
|    |          |           |           | H | -1.021122 | 3.064070  | -2.728132 |
|    |          |           |           | C | -1.731227 | 2.373477  | -0.732358 |
|    |          |           |           | C | -0.910421 | 3.483983  | -0.049500 |
|    |          |           |           | H | -0.001037 | 3.656501  | -0.644969 |
|    |          |           |           | H | -1.477133 | 4.425567  | 0.006788  |
|    |          |           |           | C | -0.525712 | 2.985795  | 1.342061  |
|    |          |           |           | H | 0.332536  | 3.543167  | 1.752254  |
|    |          |           |           | H | -1.347555 | 3.100226  | 2.065487  |

|   |           |           |           |    |           |           |           |
|---|-----------|-----------|-----------|----|-----------|-----------|-----------|
| C | -0.131189 | 1.513411  | 1.395661  | H  | -1.658188 | 3.469734  | -0.744866 |
| C | -3.110455 | 2.210511  | -0.127627 | C  | -1.821273 | 2.551214  | 1.981716  |
| C | -3.452293 | 1.130157  | 0.694820  | H  | -1.344844 | 3.350402  | 1.399416  |
| H | -2.730527 | 0.339277  | 0.905113  | H  | -1.061508 | 2.009587  | 2.555314  |
| C | -4.733305 | 1.046490  | 1.253507  | H  | -2.523123 | 3.028933  | 2.687552  |
| H | -4.973940 | 0.197120  | 1.893562  | C  | -3.204763 | -0.149864 | 2.961608  |
| C | -5.684991 | 2.032146  | 0.991580  | H  | -2.208317 | -0.029077 | 3.404018  |
| H | -6.683605 | 1.963529  | 1.429923  | H  | -3.448814 | -1.221217 | 2.961348  |
| C | -5.353502 | 3.110229  | 0.162679  | H  | -3.944762 | 0.367449  | 3.598486  |
| H | -6.092812 | 3.885715  | -0.052539 | Cl | -1.399816 | -0.001232 | -2.569076 |
| C | -4.076633 | 3.196313  | -0.389986 | O  | -0.159783 | 0.083435  | 2.549454  |
| H | -3.822955 | 4.039260  | -1.038598 | N  | 3.812025  | 1.026480  | -1.786624 |
| C | -5.971768 | -2.648892 | -1.014249 | N  | 0.042015  | -0.603325 | 0.365068  |
| H | -6.308877 | -2.783033 | -2.050696 | C  | 3.365776  | 1.894855  | -0.775290 |
| H | -6.432205 | -1.729636 | -0.613243 | C  | 4.067431  | 2.872231  | -0.071802 |
| H | -6.331825 | -3.504903 | -0.419509 | H  | 5.121587  | 3.077769  | -0.263031 |
| H | -1.493681 | -2.346360 | -2.303062 | C  | 3.361582  | 3.566691  | 0.913549  |

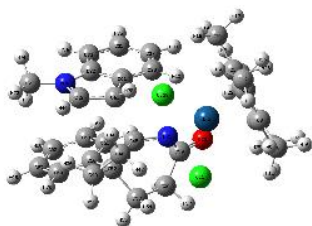

75

**TS3**

|    |           |           |           |   |           |           |           |
|----|-----------|-----------|-----------|---|-----------|-----------|-----------|
| Cl | -2.153926 | -2.592435 | -0.166605 | H | 3.871295  | 4.340494  | 1.491908  |
| Ir | -2.025287 | -0.141667 | -0.160625 | C | 2.008372  | 3.282460  | 1.176461  |
| C  | -4.105176 | -0.059671 | 0.501650  | H | 1.487497  | 3.836798  | 1.960384  |
| C  | -3.932074 | 0.802292  | -0.625749 | C | 1.321713  | 2.299473  | 0.460862  |
| C  | -2.968169 | 1.834599  | -0.252304 | H | 0.286039  | 2.054987  | 0.674495  |
| C  | -2.590341 | 1.612400  | 1.111076  | C | 2.011309  | 1.593226  | -0.525211 |
| C  | -3.231659 | 0.394811  | 1.570973  | C | 1.623352  | 0.478473  | -1.400984 |
| C  | -5.037656 | -1.221186 | 0.596610  | C | 2.800035  | 0.234451  | -2.170037 |
| H  | -5.346101 | -1.569549 | -0.396924 | H | 2.941013  | -0.485440 | -2.973429 |
| H  | -5.938287 | -0.926066 | 1.161941  | C | 1.003119  | -1.057487 | -0.506239 |
| H  | -4.557474 | -2.068003 | 1.102960  | C | 0.779439  | -2.043348 | -1.673694 |
| C  | -4.646925 | 0.731740  | -1.935711 | H | -0.108946 | -2.653523 | -1.471903 |
| H  | -5.126109 | -0.246183 | -2.074952 | H | 0.659709  | -1.614662 | -2.673254 |
| H  | -3.943423 | 0.877759  | -2.766574 | C | 2.117860  | -2.731785 | -1.342111 |
| H  | -5.427355 | 1.510220  | -1.988467 | H | 2.934731  | -2.467364 | -2.026916 |
| C  | -2.555289 | 2.968426  | -1.133327 | H | 2.091920  | -3.827376 | -1.253304 |
| H  | -3.362172 | 3.716983  | -1.214818 | C | 2.173188  | -1.971582 | 0.006581  |
| H  | -2.318721 | 2.595468  | -2.139952 | C | 1.541236  | -2.831186 | 1.122474  |
|    |           |           |           | H | 0.690348  | -3.383999 | 0.697114  |
|    |           |           |           | H | 2.276667  | -3.564331 | 1.488845  |
|    |           |           |           | C | 1.030647  | -1.935923 | 2.234354  |
|    |           |           |           | H | 0.297950  | -2.466410 | 2.863031  |
|    |           |           |           | H | 1.827615  | -1.597633 | 2.912219  |
|    |           |           |           | C | 0.280560  | -0.706796 | 1.726234  |
|    |           |           |           | C | 3.502130  | -1.406602 | 0.452473  |
|    |           |           |           | C | 3.601533  | -0.332104 | 1.352351  |
|    |           |           |           | H | 2.706623  | 0.178438  | 1.701559  |

|   |          |           |           |
|---|----------|-----------|-----------|
| C | 4.845676 | 0.121528  | 1.796669  |
| H | 4.888464 | 0.967191  | 2.486101  |
| C | 6.021926 | -0.490711 | 1.358343  |
| H | 6.993895 | -0.137305 | 1.710981  |
| C | 5.940405 | -1.566413 | 0.468906  |
| H | 6.850200 | -2.064339 | 0.123672  |
| C | 4.694380 | -2.015517 | 0.024242  |
| H | 4.647192 | -2.865459 | -0.659374 |
| C | 5.189714 | 0.935702  | -2.228479 |
| H | 5.255640 | 0.230392  | -3.066117 |
| H | 5.822623 | 0.574419  | -1.404041 |
| H | 5.545575 | 1.922520  | -2.559565 |
| H | 0.653881 | 0.523168  | -1.931051 |

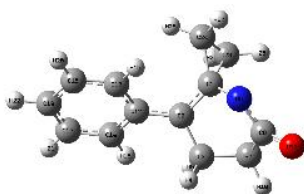

28

**TS4**

|   |           |           |           |
|---|-----------|-----------|-----------|
| C | -1.031093 | 0.877568  | 0.149483  |
| C | -0.151338 | -0.262265 | 0.187556  |
| C | -0.865081 | -1.570706 | 0.272367  |
| H | -0.621134 | -2.155111 | -0.634797 |
| H | -0.430504 | -2.153062 | 1.106487  |
| N | -2.108387 | 0.686905  | -0.729340 |
| C | -2.369810 | -1.419860 | 0.430347  |
| C | -2.924011 | -0.376710 | -0.590343 |
| H | -2.606205 | -1.042591 | 1.439947  |
| H | -2.896823 | -2.370562 | 0.283843  |
| O | -3.970789 | -0.596663 | -1.181729 |
| C | 1.285288  | -0.212560 | 0.020672  |
| C | 1.875936  | 0.808821  | -0.763260 |
| C | 2.130770  | -1.201017 | 0.580552  |
| C | 3.252751  | 0.843773  | -0.963017 |
| H | 1.233386  | 1.538553  | -1.255457 |
| C | 3.508419  | -1.145099 | 0.396635  |
| H | 1.702901  | -1.996977 | 1.191471  |
| C | 4.075131  | -0.123868 | -0.375489 |
| H | 3.688756  | 1.626192  | -1.588019 |
| H | 4.147572  | -1.902670 | 0.855412  |
| H | 5.156545  | -0.087730 | -0.525351 |

|   |           |          |          |
|---|-----------|----------|----------|
| C | -1.308698 | 1.512193 | 1.593118 |
| C | -0.636391 | 2.291664 | 0.530589 |
| H | -2.383307 | 1.639928 | 1.745014 |
| H | -0.728858 | 1.169598 | 2.453492 |
| H | -1.210848 | 3.053597 | 0.001421 |
| H | 0.422293  | 2.514193 | 0.670486 |

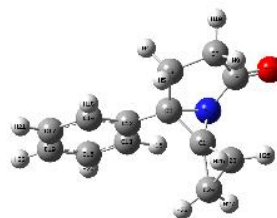

28

**Z**

|   |           |           |           |
|---|-----------|-----------|-----------|
| C | 1.078919  | 0.947556  | -0.412332 |
| C | 0.303594  | -0.288462 | -0.250821 |
| C | 0.907547  | -1.566563 | -0.842135 |
| H | 0.298309  | -2.425095 | -0.524475 |
| H | 0.903738  | -1.547686 | -1.942372 |
| N | 1.190990  | 0.223223  | 0.845076  |
| C | 2.319527  | -1.641843 | -0.250001 |
| C | 2.379895  | -0.580841 | 0.854195  |
| H | 3.109022  | -1.388995 | -0.975530 |
| H | 2.578687  | -2.625506 | 0.167026  |
| O | 3.292329  | -0.395763 | 1.609987  |
| C | -1.172087 | -0.207769 | -0.025058 |
| C | -1.692229 | 0.525726  | 1.051428  |
| C | -2.057726 | -0.835565 | -0.912633 |
| C | -3.071915 | 0.625935  | 1.235511  |
| H | -0.996160 | 1.000070  | 1.745051  |
| C | -3.439124 | -0.730505 | -0.729557 |
| H | -1.669812 | -1.409348 | -1.757391 |
| C | -3.950661 | 0.000262  | 0.345428  |
| H | -3.464602 | 1.193932  | 2.082517  |
| H | -4.117592 | -1.224048 | -1.429697 |
| H | -5.030559 | 0.080041  | 0.491095  |
| C | 2.057201  | 1.563846  | -1.335282 |
| C | 0.905422  | 2.375272  | -0.725307 |
| H | 3.064770  | 1.760819  | -0.955351 |
| H | 2.008965  | 1.308153  | -2.398678 |
| H | 1.159809  | 3.099450  | 0.053590  |
| H | 0.069683  | 2.659463  | -1.371819 |

## 8. Reference

- [1] Fan, Q.-K.; Bai, Z.-Q.; He, G.; Chen, G.; Wang, H., Iridium-catalyzed nitrene-mediated enantioselective 1,2-Hydride shift enabled by attractive noncovalent interactions for chiral  $\delta$ -lactam synthesis. *J. Am. Chem. Soc.* **2025**, *147*, 20680-20692.
- [2] Wei, H.-Z.; Wei, Y.; Shi, M., Intramolecular difunctionalization of methylenecyclopropanes tethered with carboxylic acid by visible-light photoredox catalysis. *Org. Chem. Front.* **2021**, *8*, 4527-4532.
- [3] Wu, M.-B.; Xu, Y.-Z.; Bai, S.-L.; An, Q.-Q.; Song, J.-C.; Gao, P.-P.; Li, J.; Huo, J.-Y.; Qi, X.-B.; Yan, J.-H.; Xie, W.-Q. Cp\*Ir(III)-Catalyzed Asymmetric Tandem Intramolecular Aziridination/Aza-Semipinacol Rearrangement of Alkenyl 1,4,2-Dioxazol-5-one. *ACS Catal.* **2025**, *15*, 12, 10310-10319.
- [4] Frisch, M. J., Trucks, G. W., Schlegel, H. B., Scuseria, G. E., Robb, M. A., Cheeseman, J. R., Scalmani, G., Barone, V., Petersson, G. A., Nakatsuji, H., Li, X., Caricato, M., Marenich, A. V., Bloino, J., Janesko, B. G., Gomperts, R., Mennucci, B., Hratchian, H. P., Ortiz, J. V., Izmaylov, A. F., Sonnenberg, J. L. WilliamsYoung, D., Ding, F., Lipparini, F., Egidi, F., Goings, J., Peng, B., Petrone, A., Henderson, T., Ranasinghe, D., Zakrzewski, V. G., Gao, J., Rega, N., Zheng, G., Liang, W., Hada, M., Ehara, M., Toyota, K., Fukuda, R., Hasegawa, J., Ishida, M., Nakajima, T., Honda, Y., Kitao, O., Nakai, H., Vreven, T., Throssell, K., Montgomery Jr., J. A., Peralta, J. E., Ogliaro, F., Bearpark, M. J., Heyd, J. J., Brothers, E. N., Kudin, K. N., Staroverov, V. N., Keith, T. A., Kobayashi, R., Normand, J., Raghavachari, K., Rendell, A. P., Burant, J. C., Iyengar, S. S., Tomasi, J., Cossi, M., Millam, J. M., Klene, M., Adamo, C., Cammi, R., Ochterski, J. W., Martin, R. L., Morokuma, K., Farkas, O., Foresman, J. B. & Fox, D. J. Gaussian 16 Rev. C.01, **2016**.
- [5] (a) Becke, A. D. Density-functional exchange-energy approximation with correct asymptotic behavior. *Phys. Rev. A* **1988**, *38*, 3098-3100. (b) Lee, C., Yang, W. T. & R. G. Development of the colle-salvetti correlation-energy formula into a functional of the electron density. *Phys. Rev. B* **1988**, *38*, 785-789. (c) Becke, A. D. Density-functional thermochemistry. III. the role of exact exchange. *J. Chem. Phys.* **1993**, *98*, 5648-5652.

- (d) Stephens, P. J., Devlin, F. J., Chabalowski, C. F. & Frisch, M. J. Ab initio calculation of vibrational absorption and circular dichroism spectra using density functional force fields. *J. Phys. Chem.* **1993**, *98*, 11623-11627. (e) Vosko, S. H., Wilk, L. & Nusair, M. Accurate spin-dependent electron liquid correlation energies for local spin density calculations: a critical analysis. *Can. J. Phys.* **1980**, *58*, 1200-1211.
- [6] Grimme, S., Ehrlich, S. & Goerigk, L. Effect of the damping function in dispersion corrected density functional theory. *J. Comput. Chem.* **2011**, *32*, 1456-1465.
- [7] (a) Hay, P. J. & Wadt, W. R. Ab initio effective core potentials for molecular calculations. Potentials for the transition metal atoms Sc to Hg. *J. Chem. Phys.* **1985**, *82*, 270-283. (b) Wadt, W. R. & Hay, P. J. Ab initio effective core potentials for molecular calculations. Potentials for main group elements Na to Bi. *J. Chem. Phys.* **1985**, *82*, 284-298. (c) Hay, P. J. & Wadt, W. R. Ab *initio* effective core potentials for molecular calculations. Potentials for K to Au including the outermost core orbitals. *J. Chem. Phys.* **1985**, *82*, 299-310.
- [8] (a) Ditchfield, R., Hehre, W. J. & Pople, J. A. Self-consistent molecular orbital methods. IX. An extended Gaussian-Type basis for molecular-orbital studies of organic molecules. *J. Chem. Phys.* **1971**, *54*, 724-728. (b) Hehre, W. J., Ditchfield, R. & Pople, J. A. Self-consistent molecular orbital methods. XII. Further extensions of Gaussian-Type basis sets for use in molecular orbital studies of organic molecules. *J. Chem. Phys.* **1972**, *56*, 2257-2261.
- [9] Pracht, P.; Grimme, S.; Bannwarth, C.; Bohle, F.; Ehlert, S.; Feldmann, G.; Gorges, J.; Müller, M.; Neudecker, T.; Plett, C.; Spicher, S.; Steinbach, P.; Wesolowski, P.A.; Zeller, F. CREST — A program for the exploration of low-energy molecular chemical space. *J. Chem. Phys.* **2024**, *160*, 114110.
- [10] Zhao, Y. & Truhlar, D. G. The M06 suite of density functionals for main group thermochemistry, thermochemical kinetics, noncovalent interactions, excited states, and transition elements: two new functionals and systematic testing of four M06-class functionals and 12 other functionals. *Theor. Chem. Acc.* **2008**, *120*, 215-241.
- [11] (a) Weigend, F. & Ahlrichs, R. Balanced basis sets of split valence, triple zeta valence and quadruple zeta valence quality for H to Rn: Design and assessment of

- accuracy. *Phys. Chem. Chem. Phys.* **2005**, *7*, 3297-3305. (b) Weigend, F. Accurate coulomb-fitting basis sets for H to Rn. *Phys. Chem. Chem. Phys.* **2006**, *8*, 1057-1065.
- [12] Marenich, A. V., Cramer, C. J. & Truhlar, D. G. Universal solvation model based on solute electron density and on a continuum model of the solvent defined by the bulk dielectric constant and atomic surface tensions. *J. Phys. Chem. B* **2009**, *113*, 6378-6396.
- [13] Zhang, X. L. & Paton, R. S. Stereoretention in styrene heterodimerisation promoted by one-electron oxidants. *Chem. Sci.* **2020**, *11*, 9309-9324.
- [14] Luchini, G.; Alegre-Requena, J. V.; Funes-Ardoiz, I.; Paton, R. S. GoodVibes: Automated thermochemistry for heterogeneous computational chemistry data. *FI000Research*, **2020**, *9*, 291.
- [15] Lu, T. & Chen, F. W. Multiwfn: a Multifunctional wavefunction analyzer. *J. Comput. Chem.* **2012**, *33*, 580-592.
- [16] Humphrey, W., Dalke, A. & Schulten, K. VMD: Visual molecular dynamics. *J. Mol. Graphics* **1996**, *14*, 33-38.
- [17] Legault, C. Y. CYLview, 1.0b. Université de Sherbrooke, **2009** (<http://www.cylview.org>).
- [18] Glendening, E. D.; Landis, C. R.; Weinhold, F. NBO 7.0: New vistas in localized and delocalized chemical bonding theory. *J. Comp. Chem.* **2019**, *40*, 2234-2241.

### 9. NMR Spectra

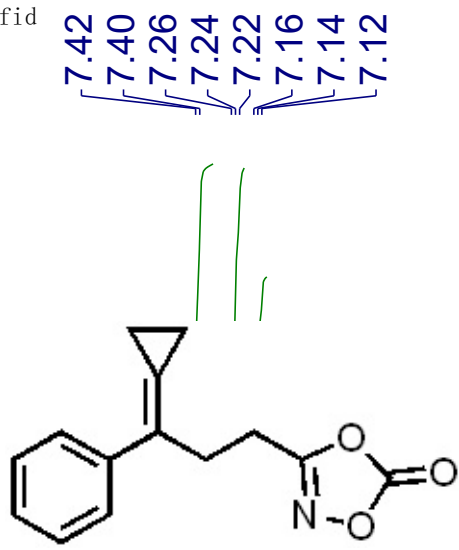

1a

7.42  
7.40  
7.26  
7.24  
7.22  
7.16  
7.14  
7.12

2.97  
2.95  
2.93  
2.77  
2.75  
2.73

1.32  
1.30  
1.30  
1.28  
1.10  
1.08  
1.06

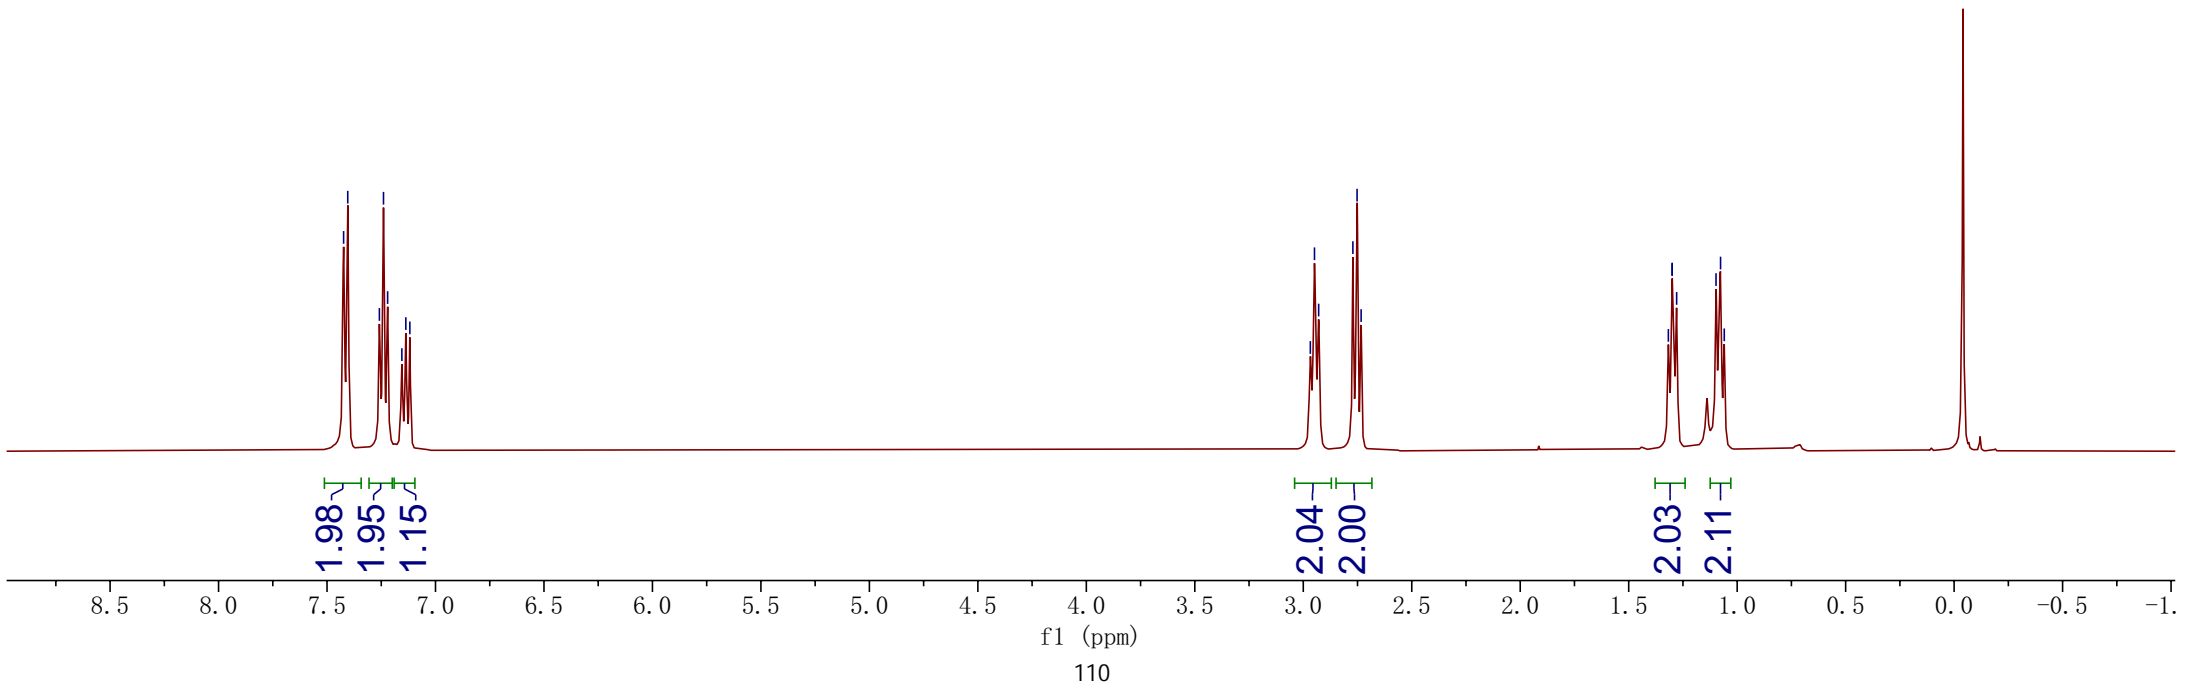

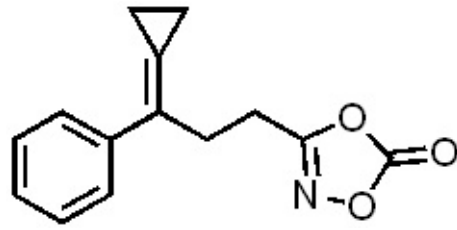

1a

—166.51  
—154.23  
—138.65  
128.66  
127.30  
—125.90  
124.29  
123.43

—29.00  
—24.05

—4.81  
—1.62

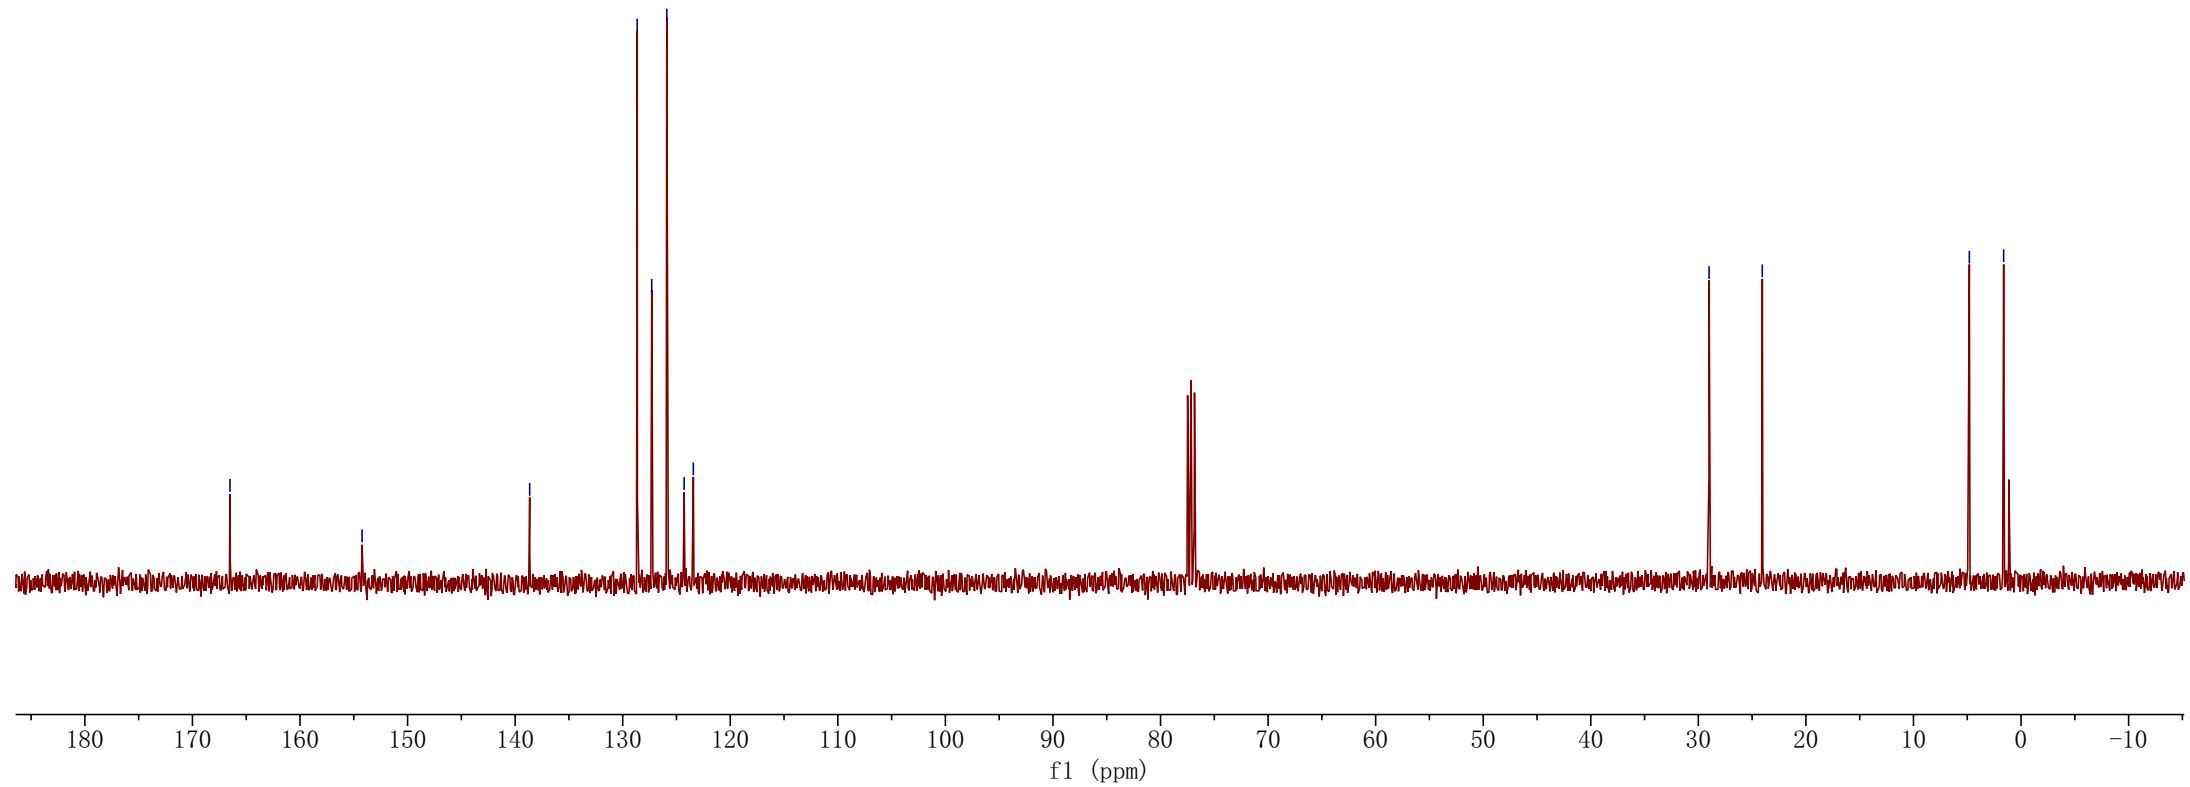

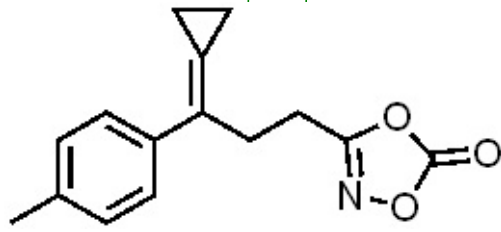

1b

7.48  
7.46  
7.21  
7.19

3.10  
3.08  
3.06  
2.91  
2.89  
2.87  
2.38

1.45  
1.43  
1.41  
1.23  
1.21  
1.19

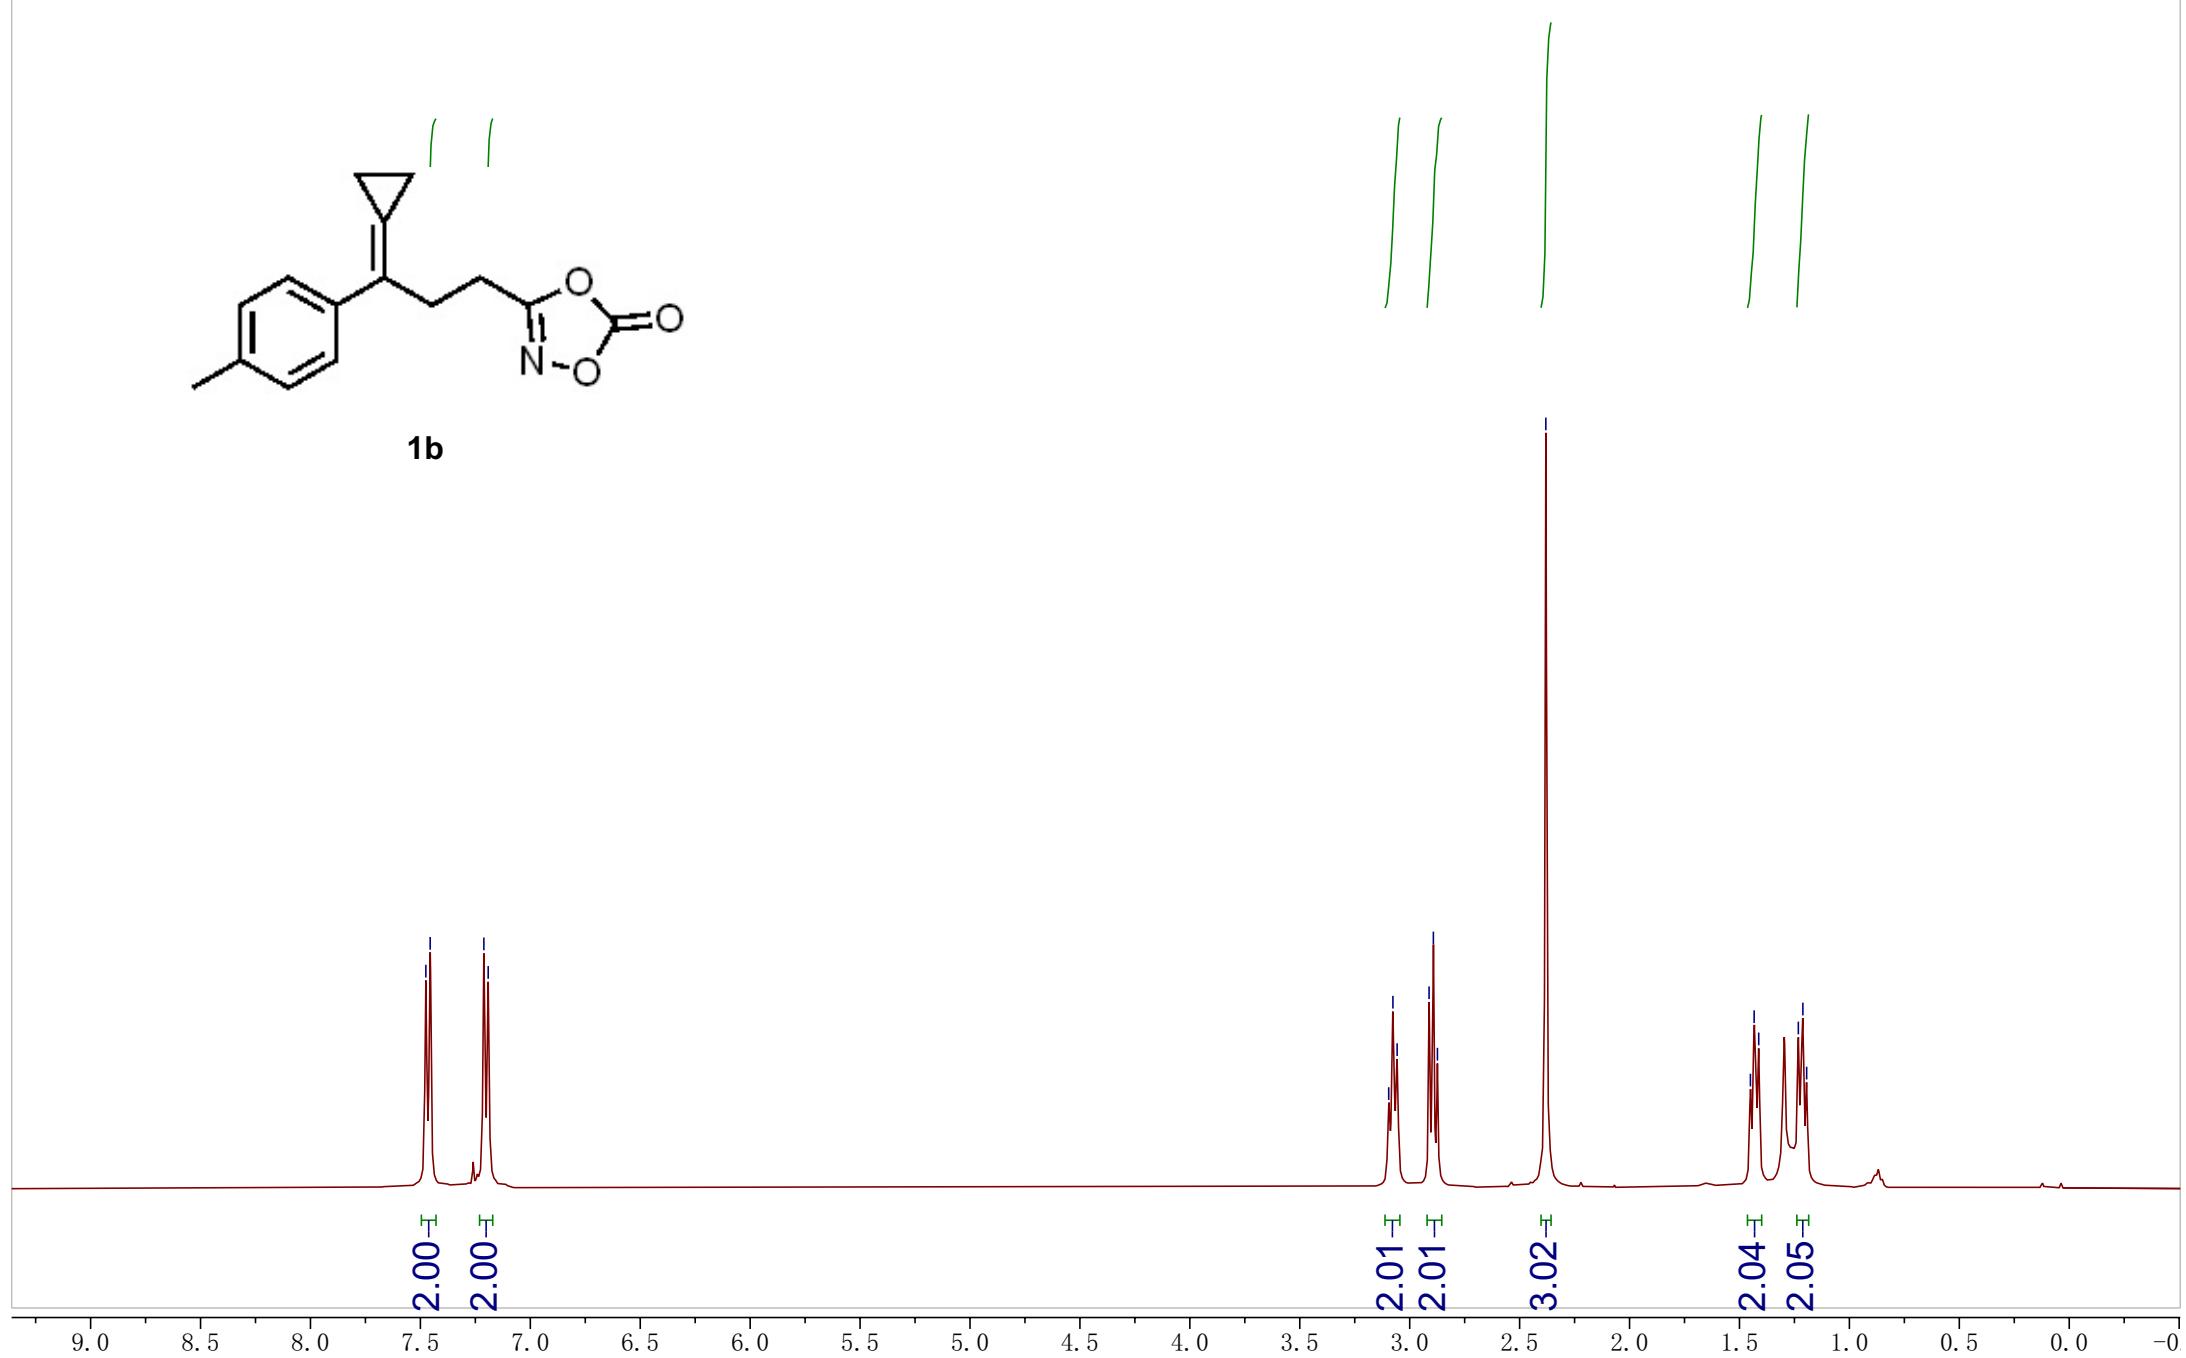

2.00  
2.00

2.01  
2.01

3.02

2.04  
2.05

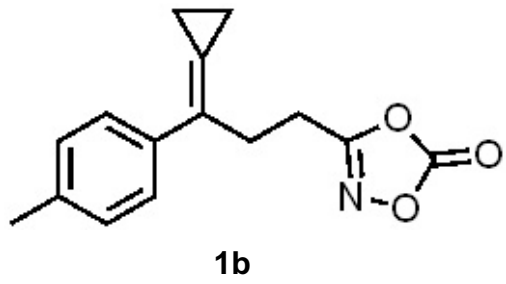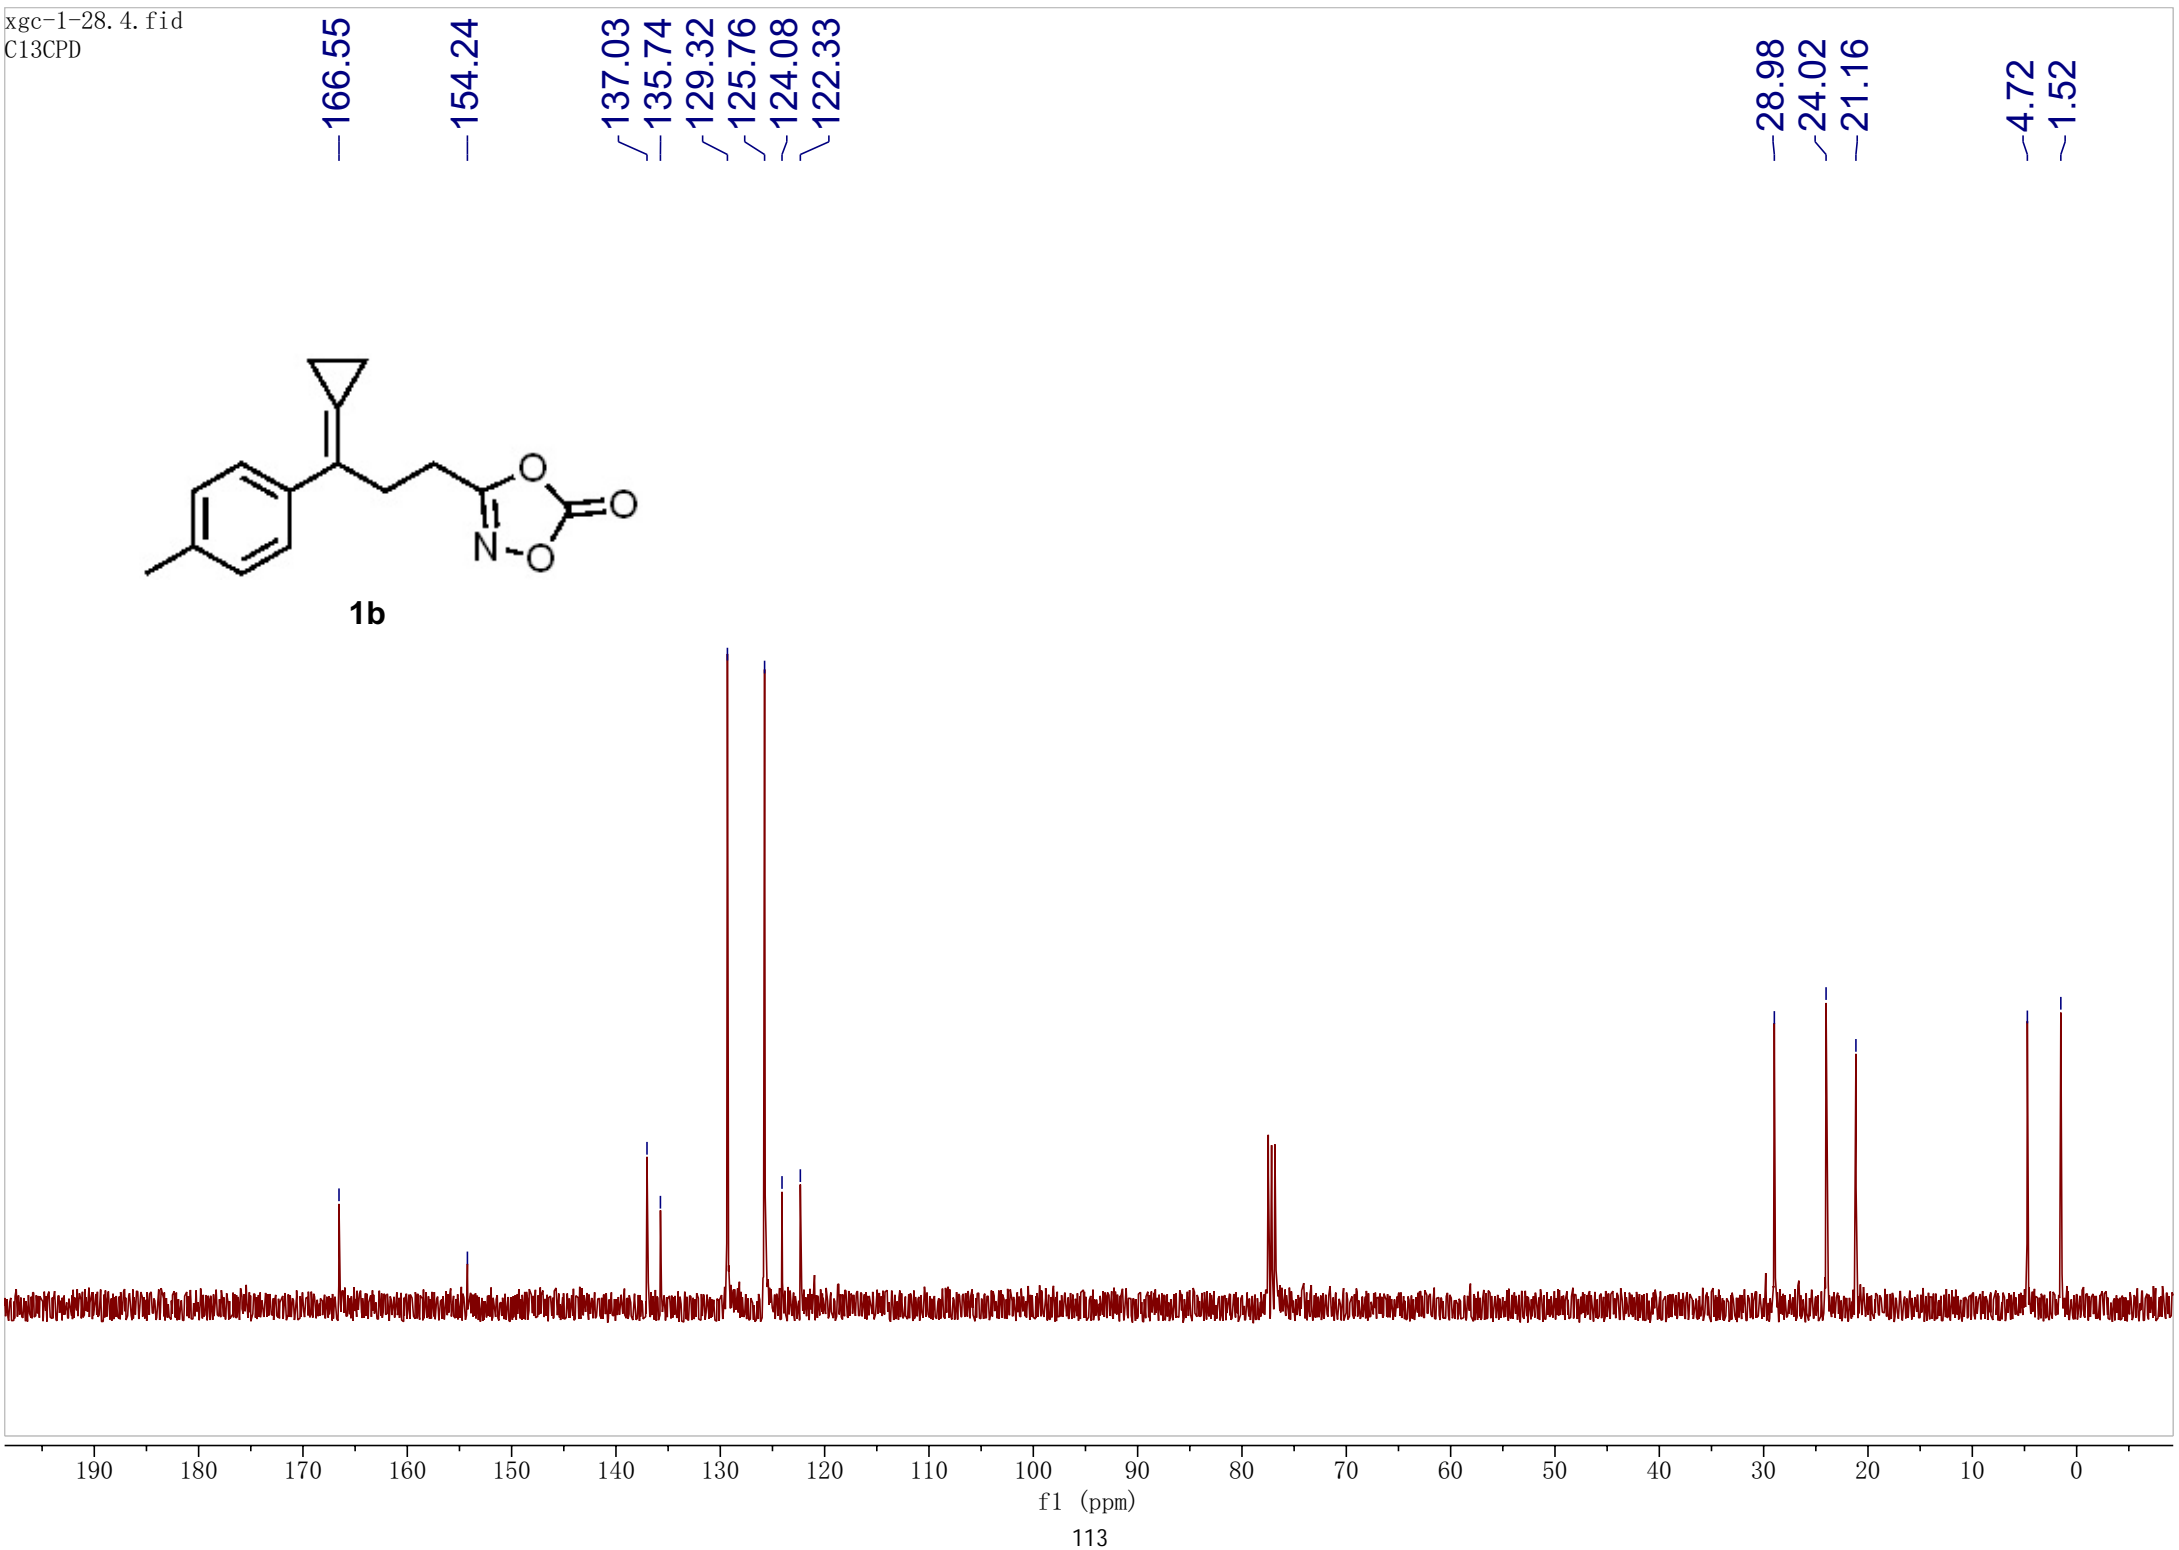

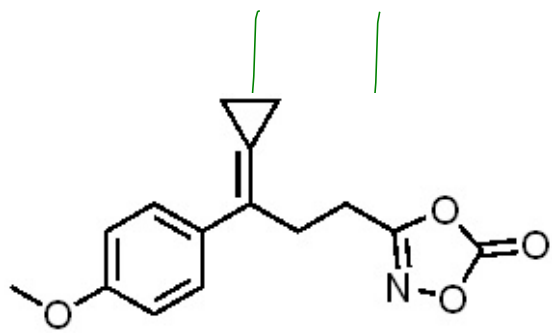

1c

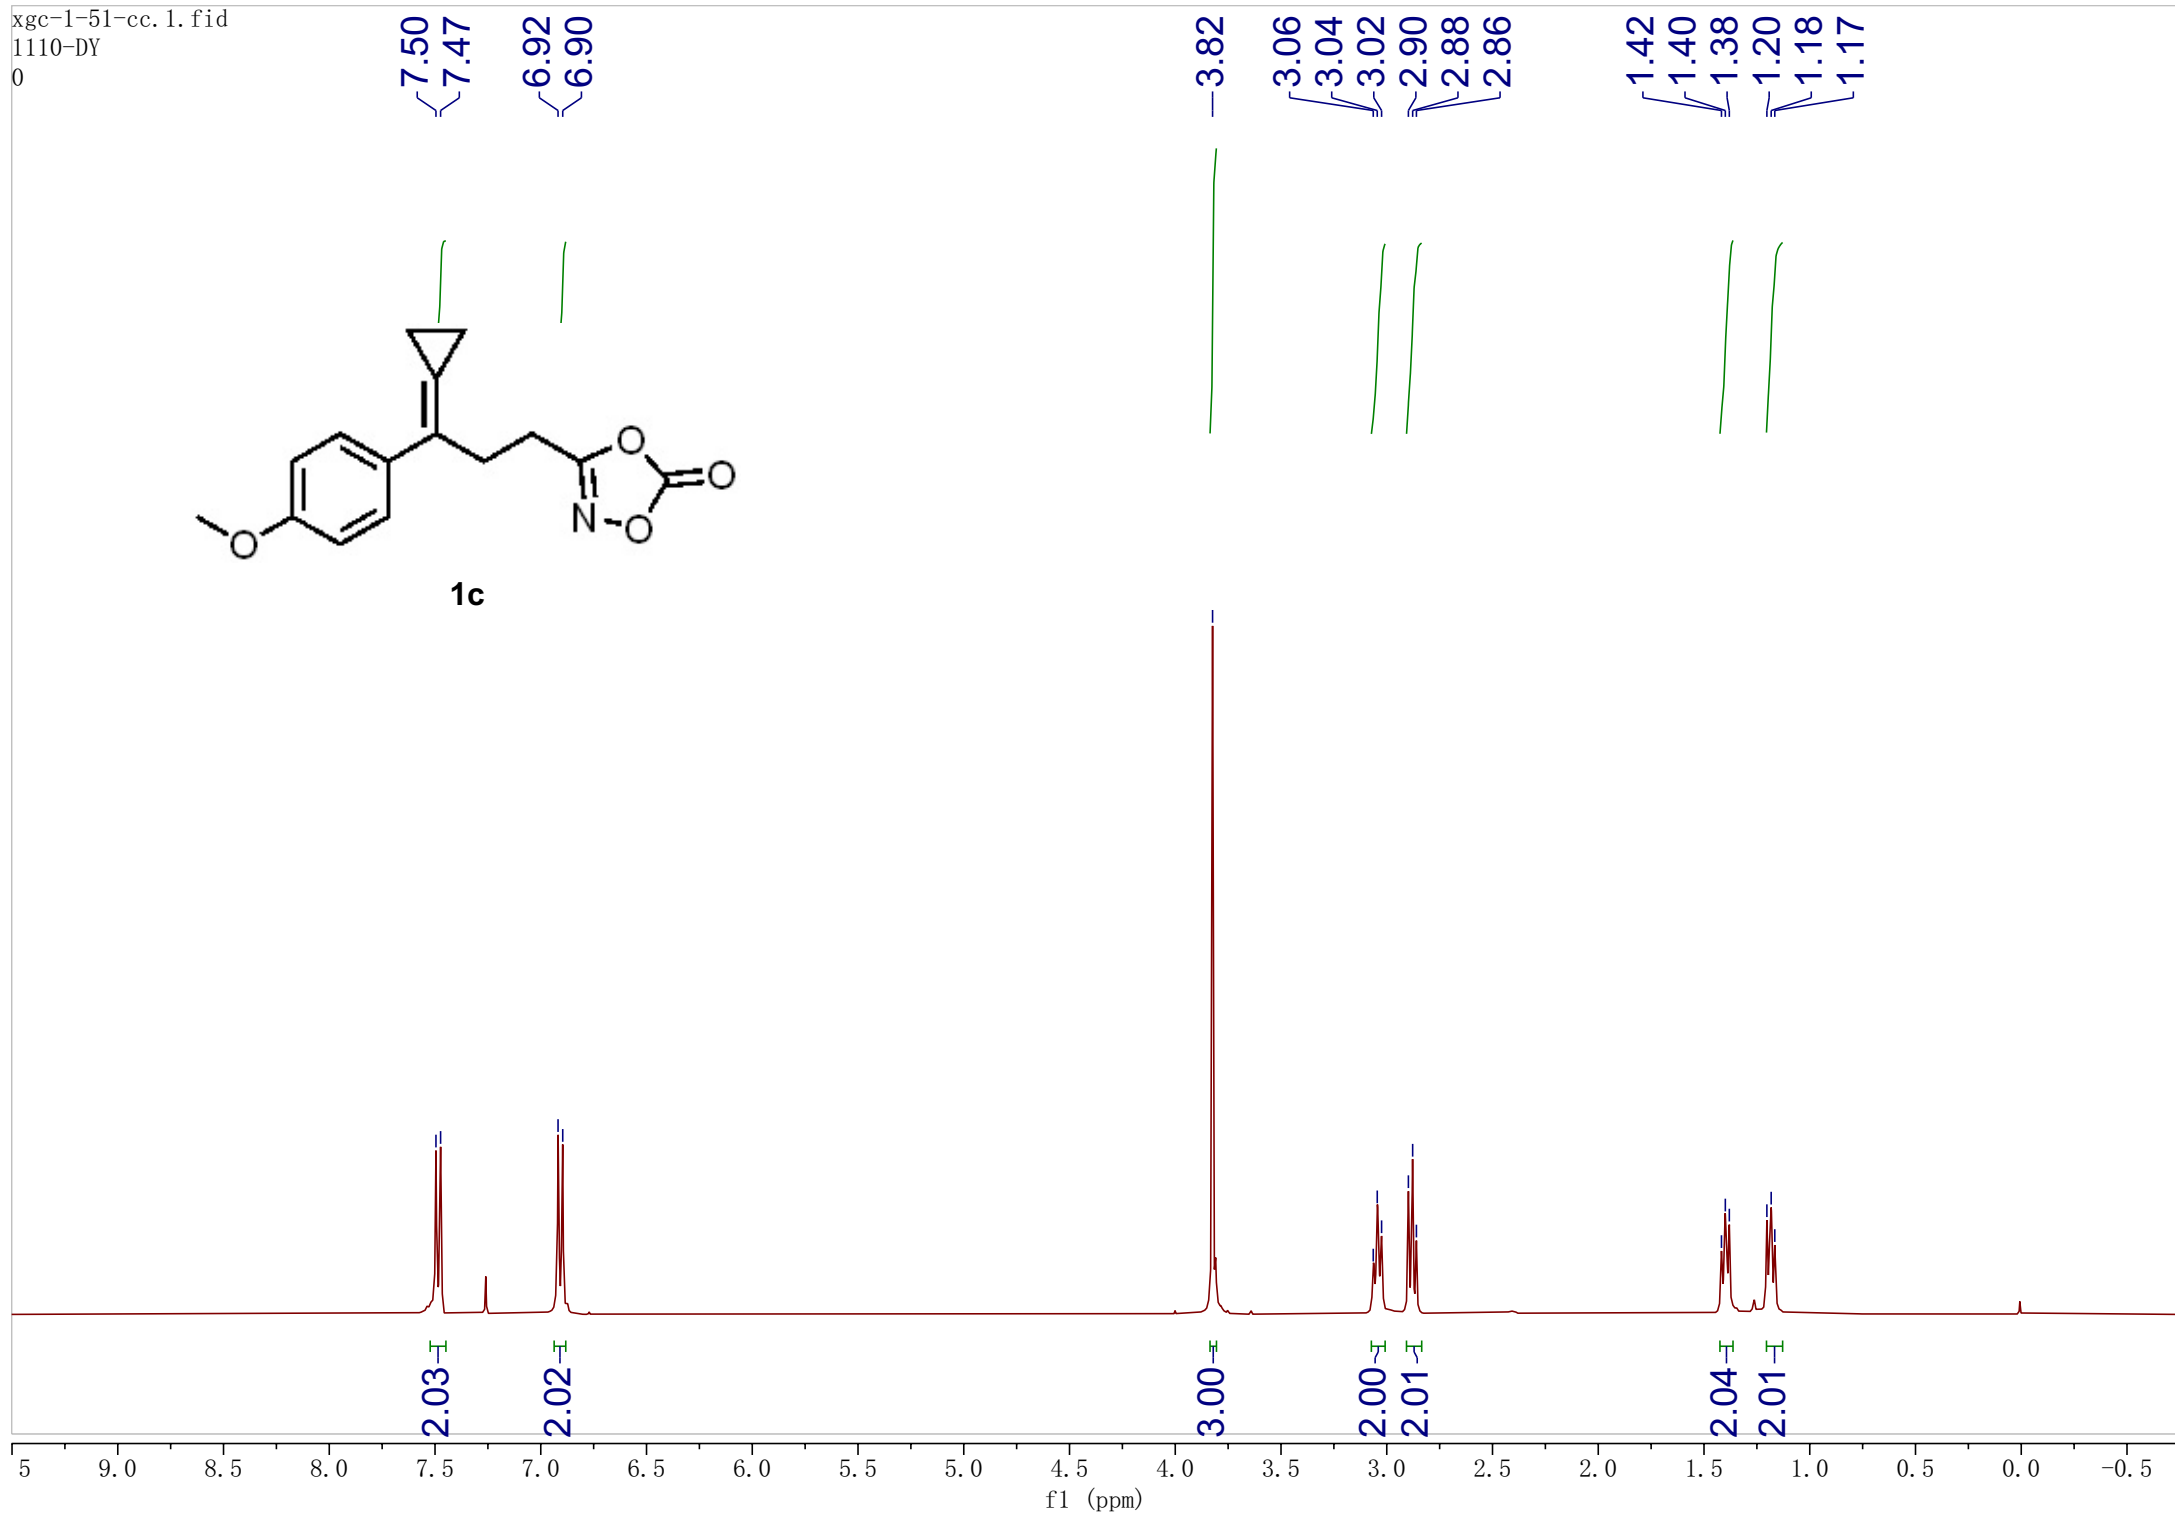

166.56  
158.86  
154.26

131.17  
127.00  
123.65  
121.29  
114.02

55.40

29.07  
24.06

4.72  
1.55

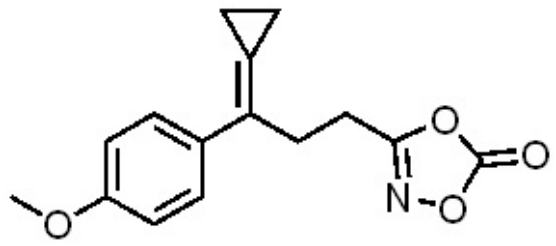

1c

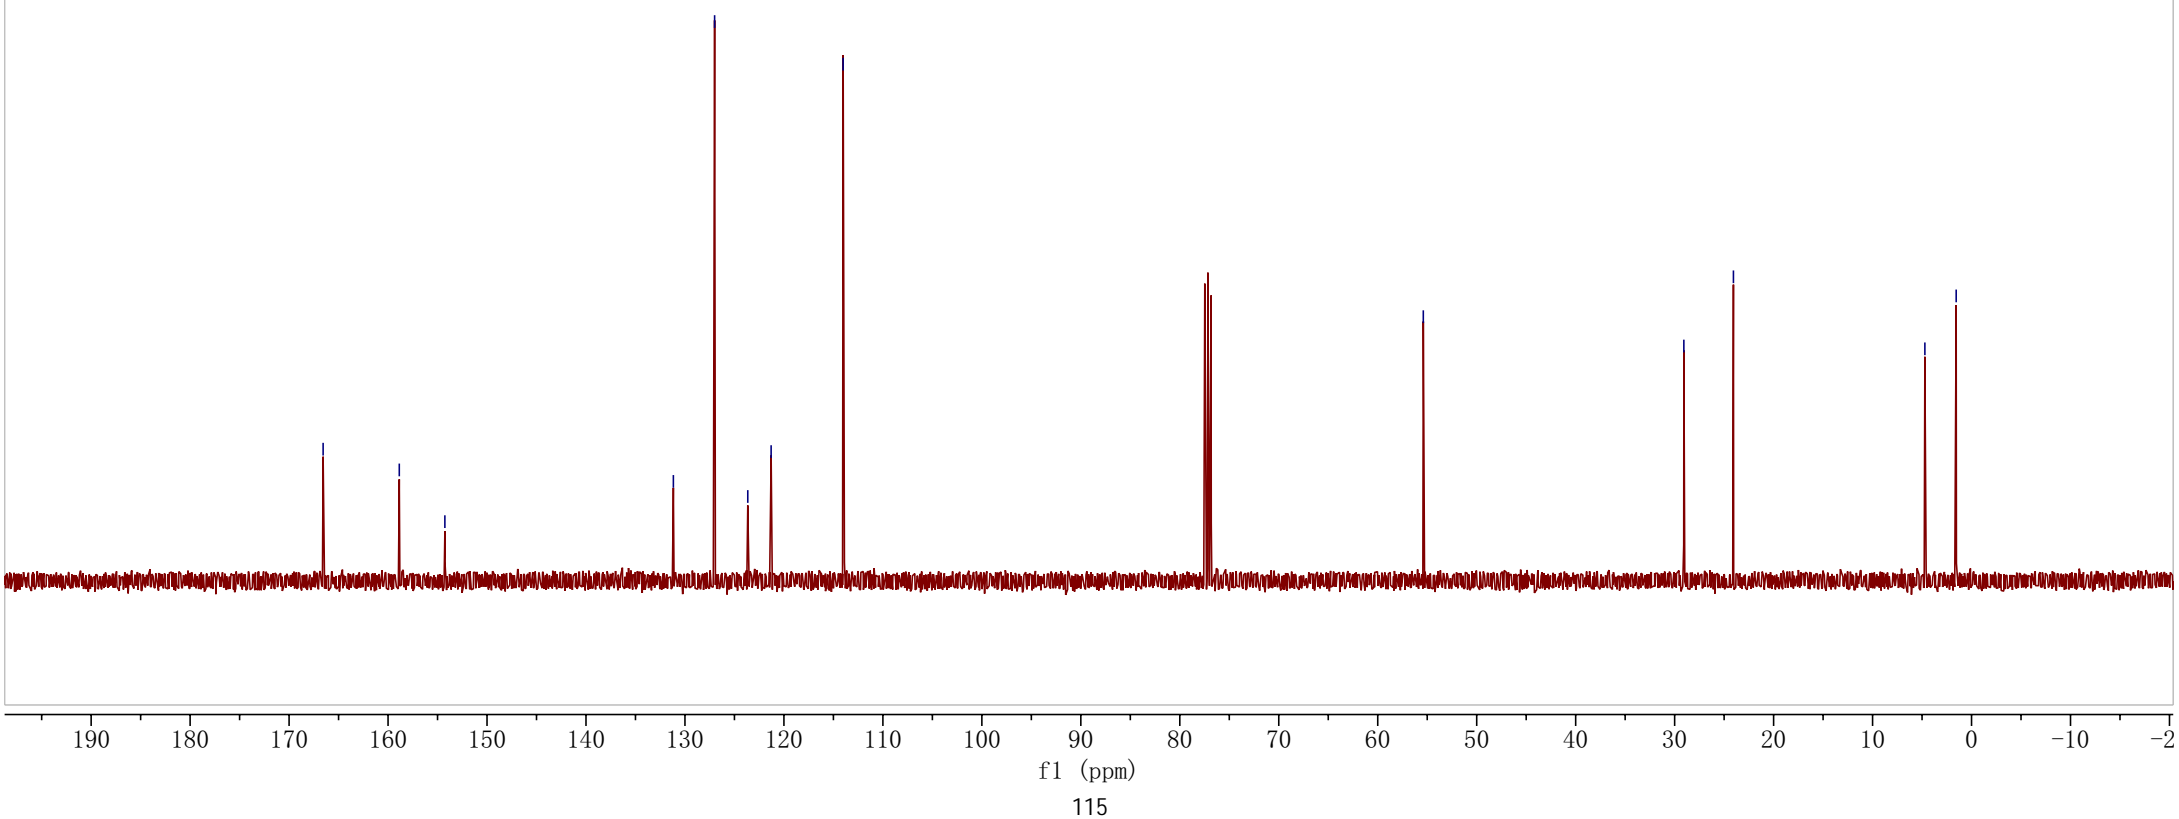

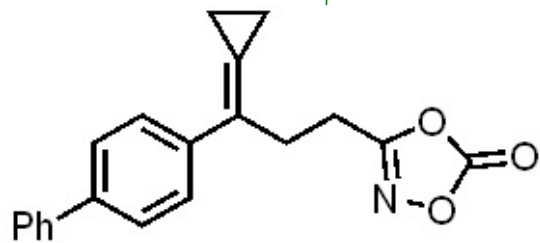

1d

7.66  
7.63  
7.63  
7.62  
7.49  
7.47  
7.45  
7.39  
7.37  
7.35

3.14  
3.12  
3.10  
2.95  
2.93  
2.91

1.50  
1.49  
1.47  
1.26  
1.24  
1.23

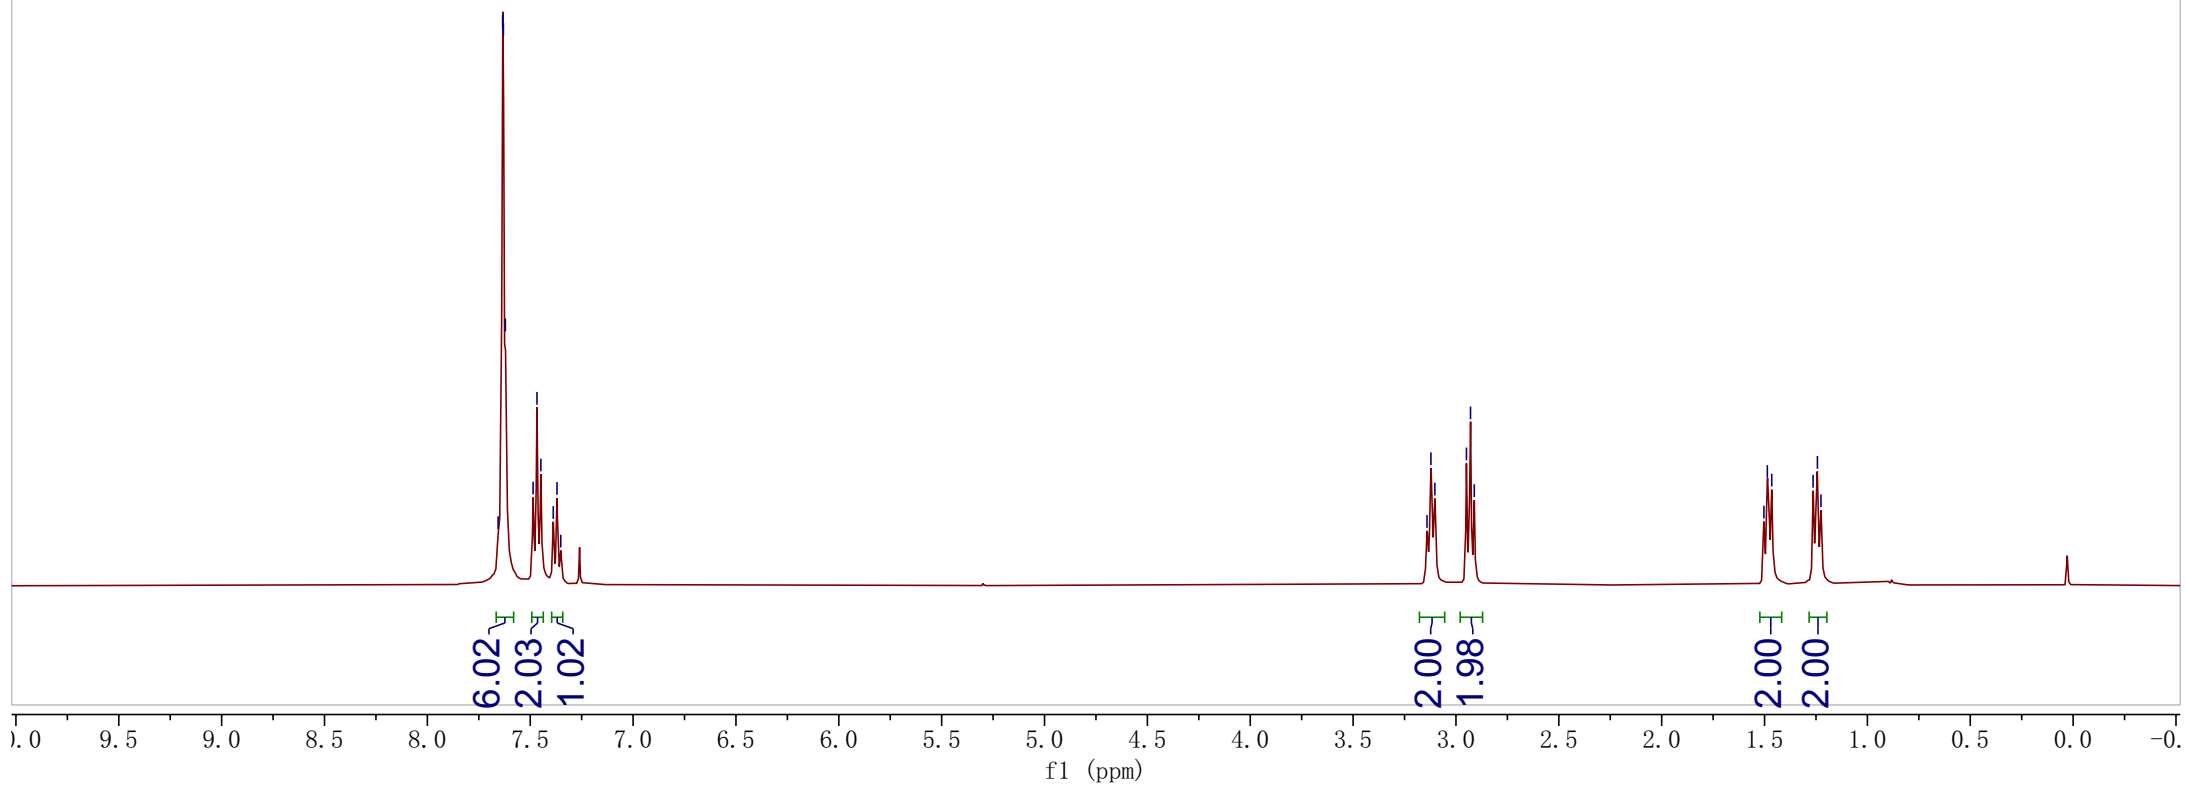

6.02  
2.03  
1.02

2.00  
1.98

2.00  
2.00

f1 (ppm)

xgc-1-24.2.fid  
1D 13C with H decoupling

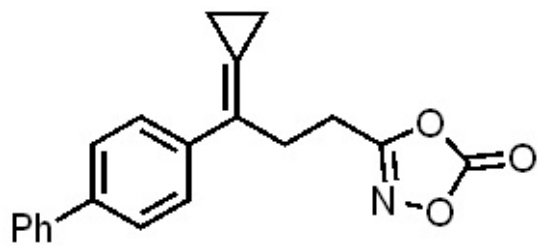

1d

166.51  
154.24  
140.67  
140.03  
137.56  
128.93  
127.47  
127.33  
127.05  
126.27  
123.91  
123.64

28.95  
24.09

4.94  
1.66

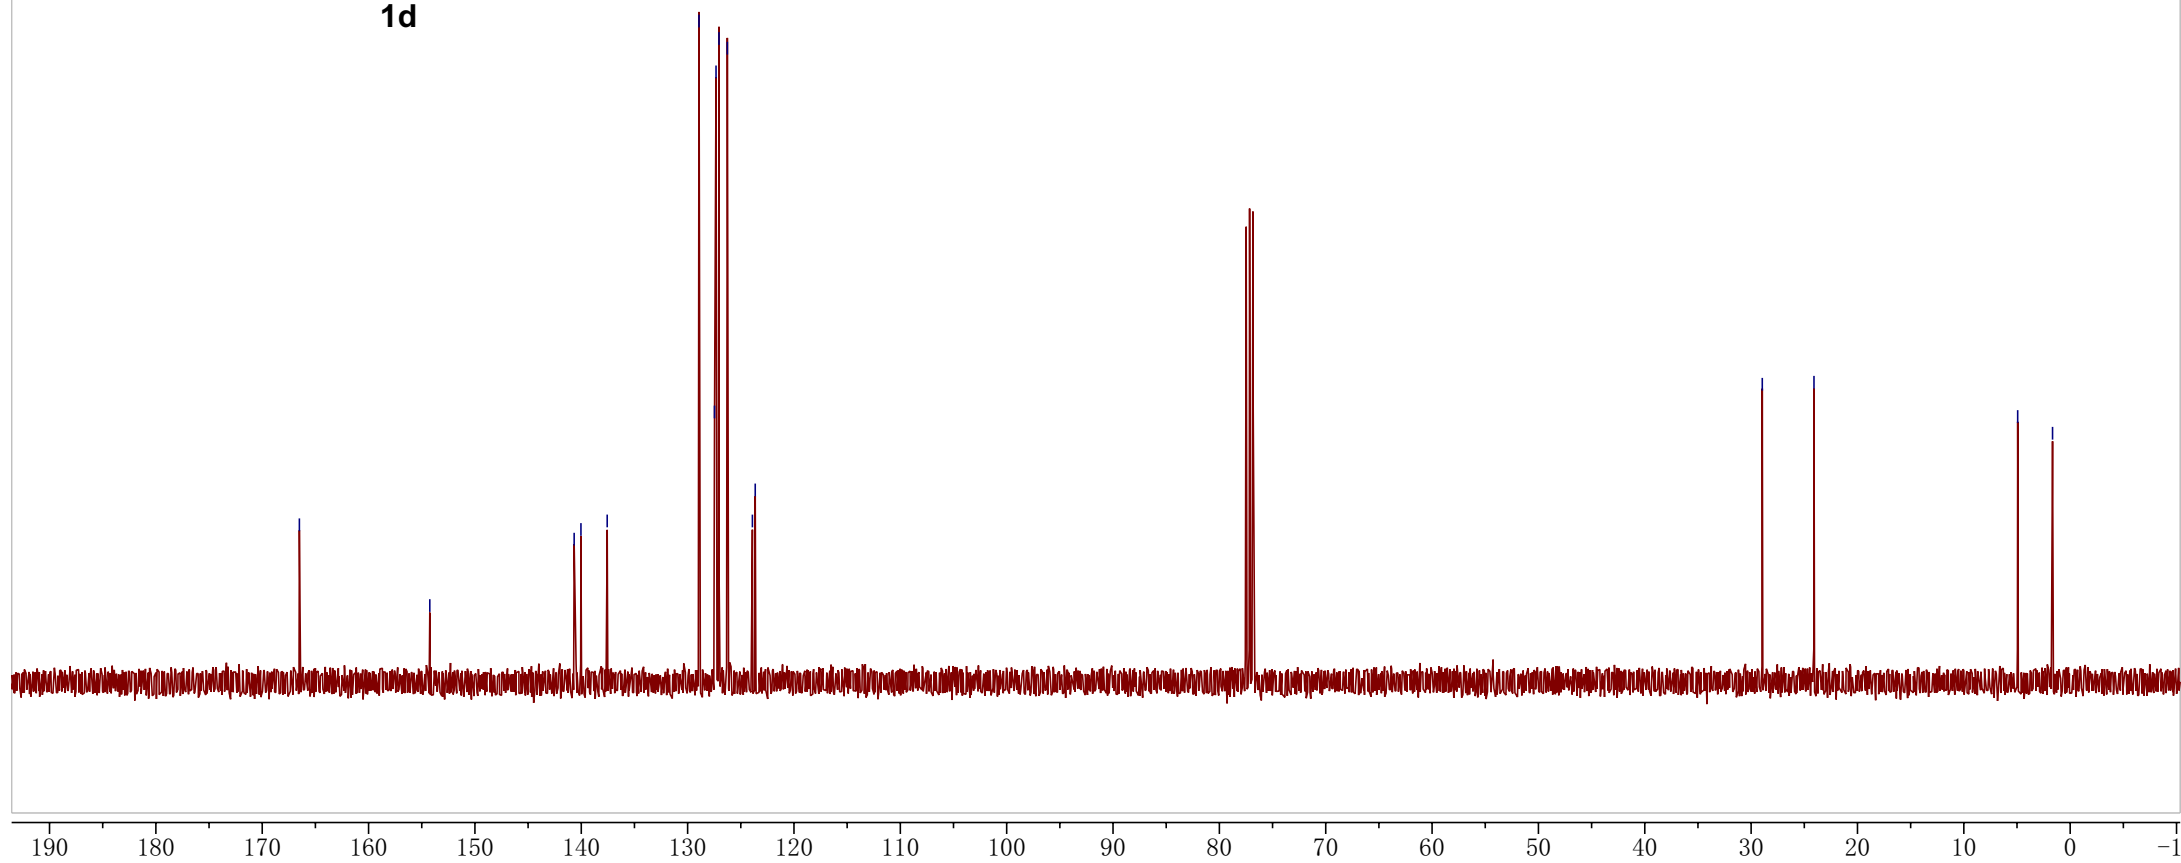

f1 (ppm)

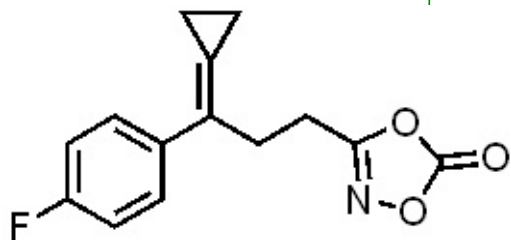

1e

7.53  
7.53  
7.52  
7.51  
7.50  
7.50  
7.07  
7.07  
7.05  
7.05  
7.04  
7.03

3.07  
3.05  
3.03  
2.90  
2.88  
2.87  
1.42  
1.40  
1.38  
1.24  
1.22  
1.20

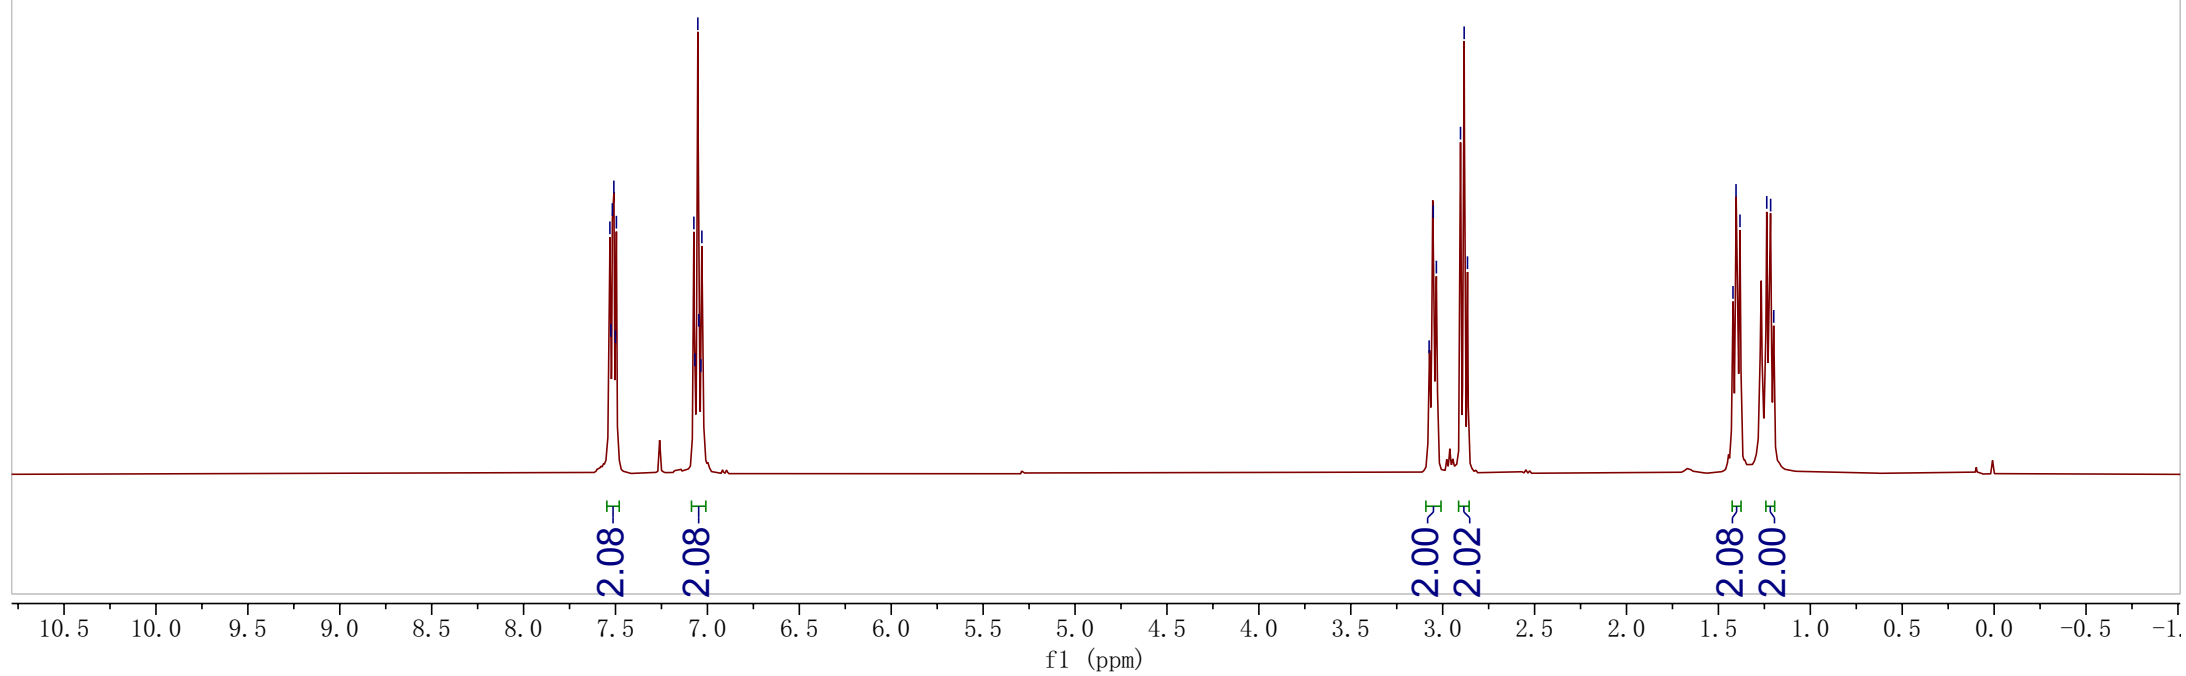

xgc-1-40-hc. 3. fid  
C13CPD

166.43  
163.24  
160.79  
154.18  
134.82  
127.51  
127.45  
127.43  
123.33  
123.17  
123.15  
115.57  
115.35

-29.01  
-23.88

-4.62  
-1.75

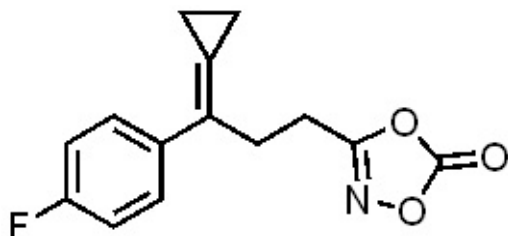

1e

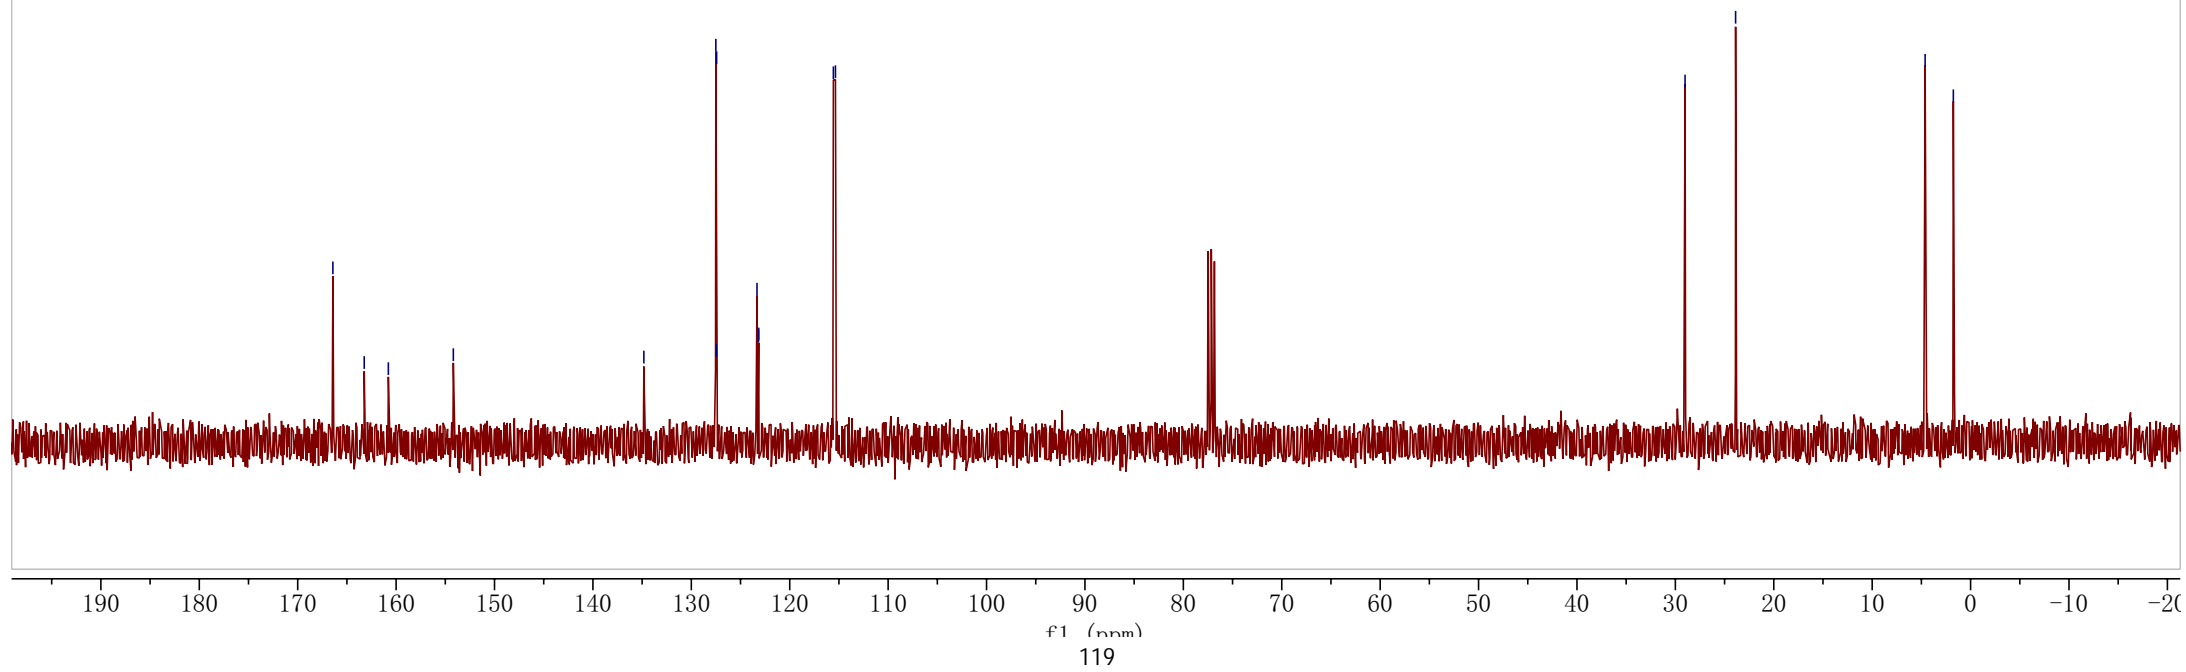

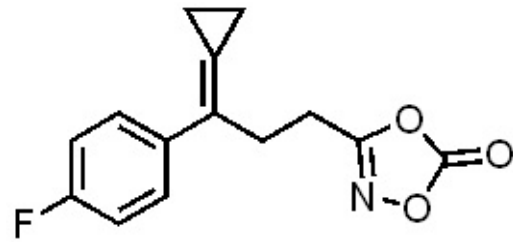

**1e**

--115.13

100

50

0

-50

-100  
f1 (ppm)

-150

-200

-250

-300

120

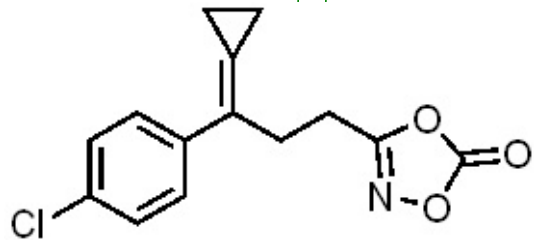

1f

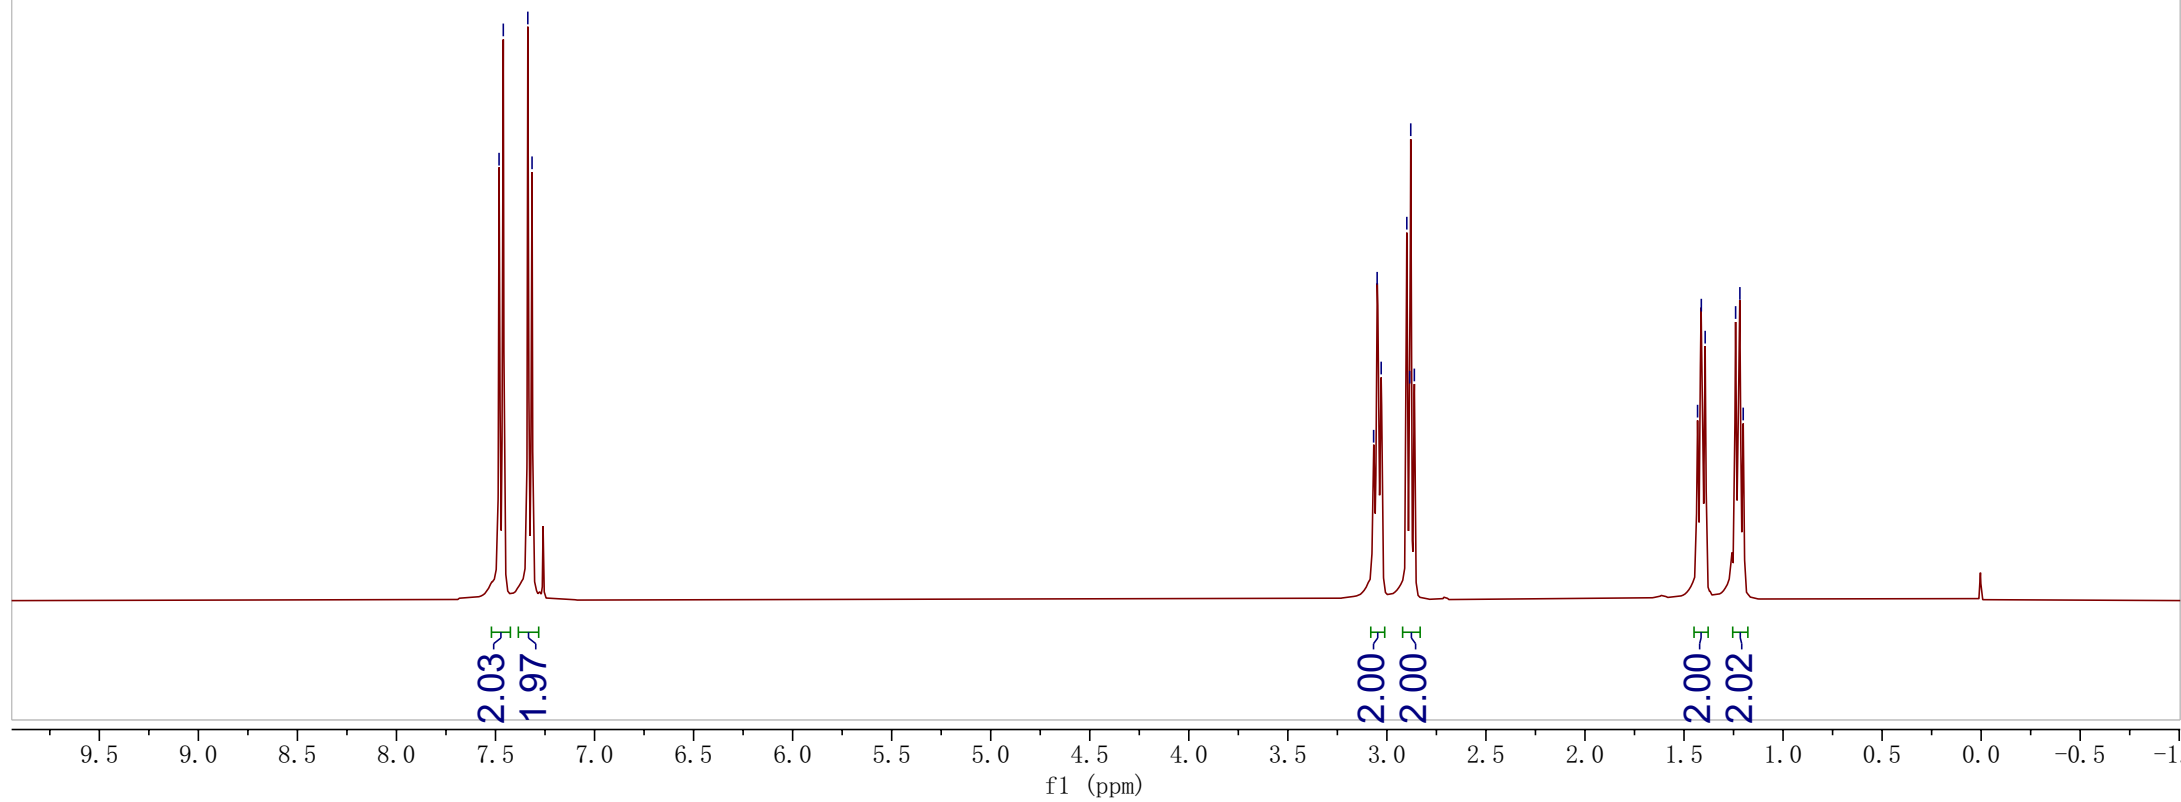

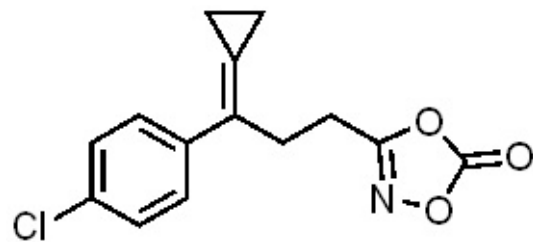

1f

— 166.35  
— 154.16  
/ 137.14  
/ 133.00  
/ 128.78  
/ 127.14  
/ 124.21  
/ 123.30

— 28.83  
— 23.90  
~ 4.78  
~ 1.78

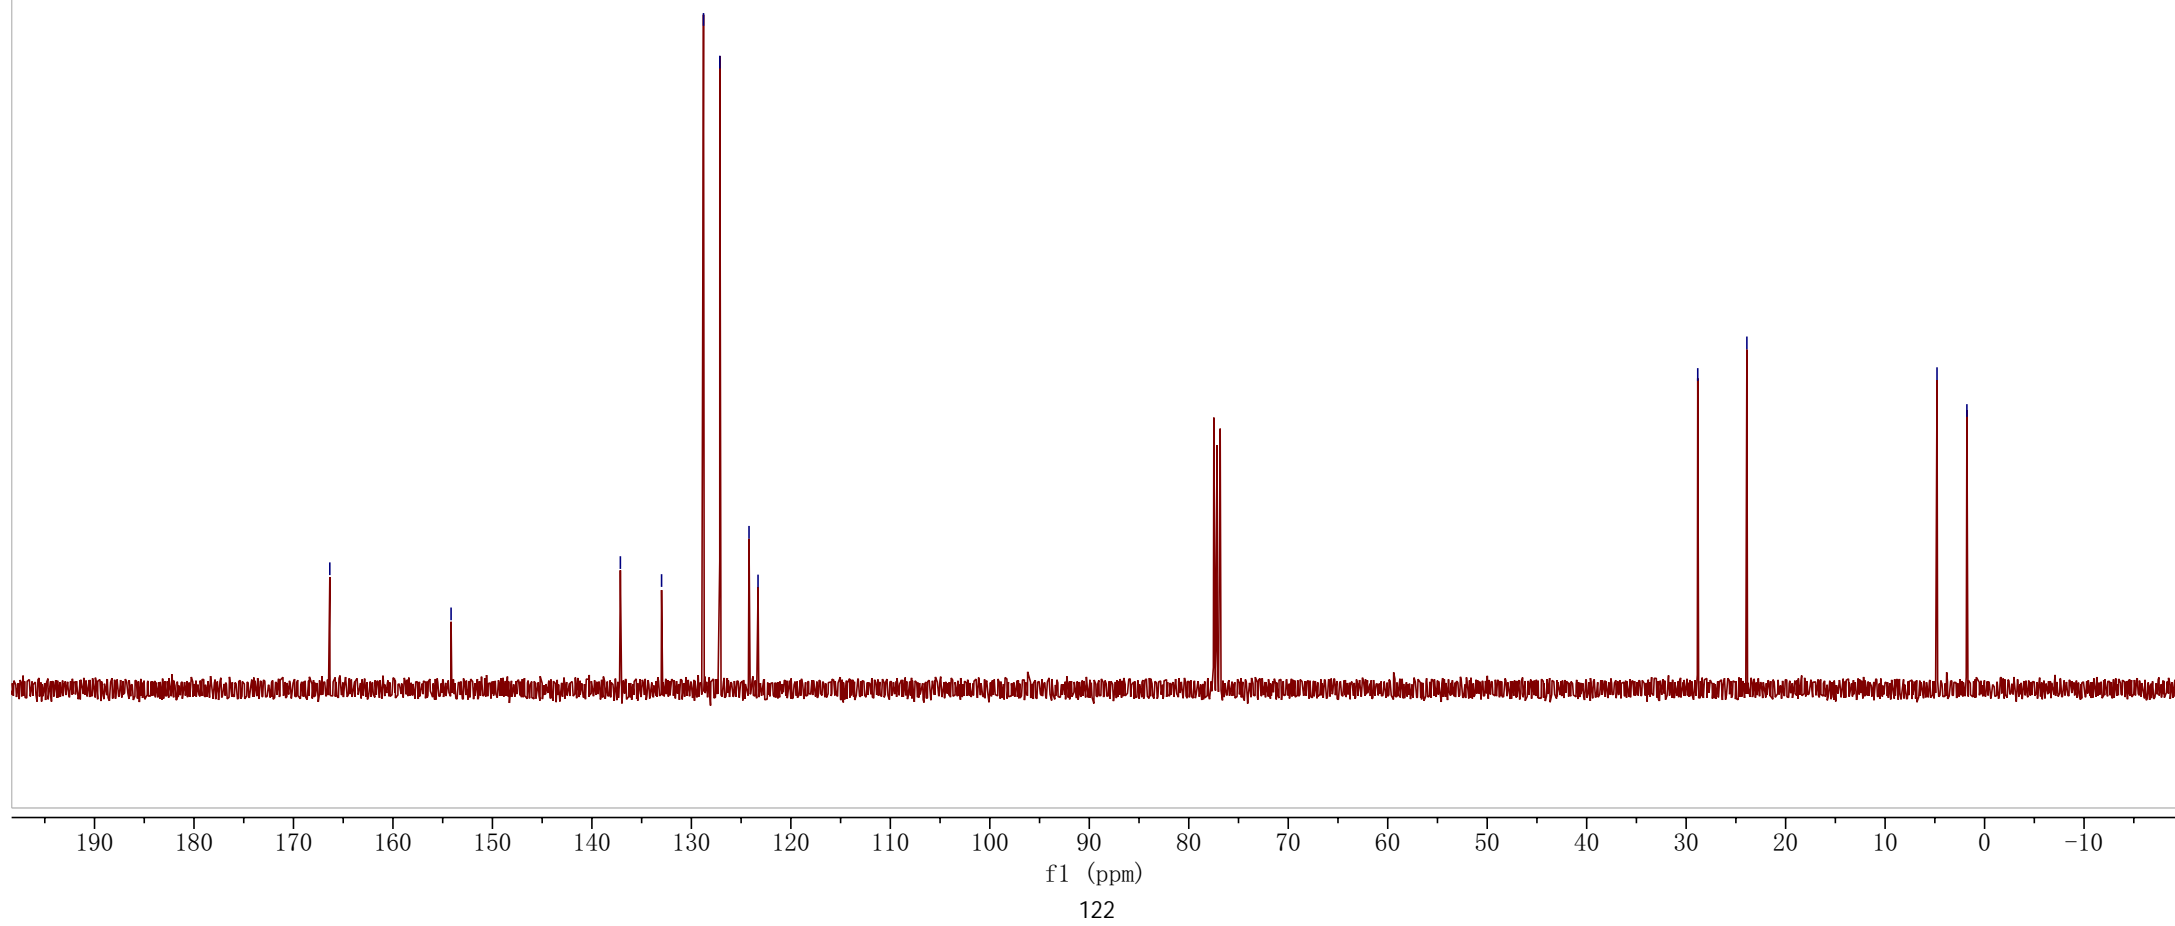

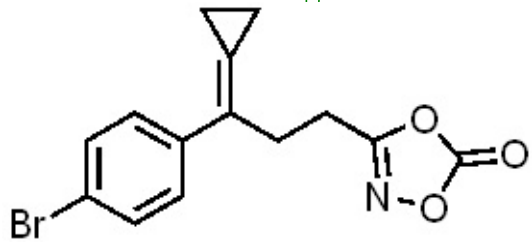

1g

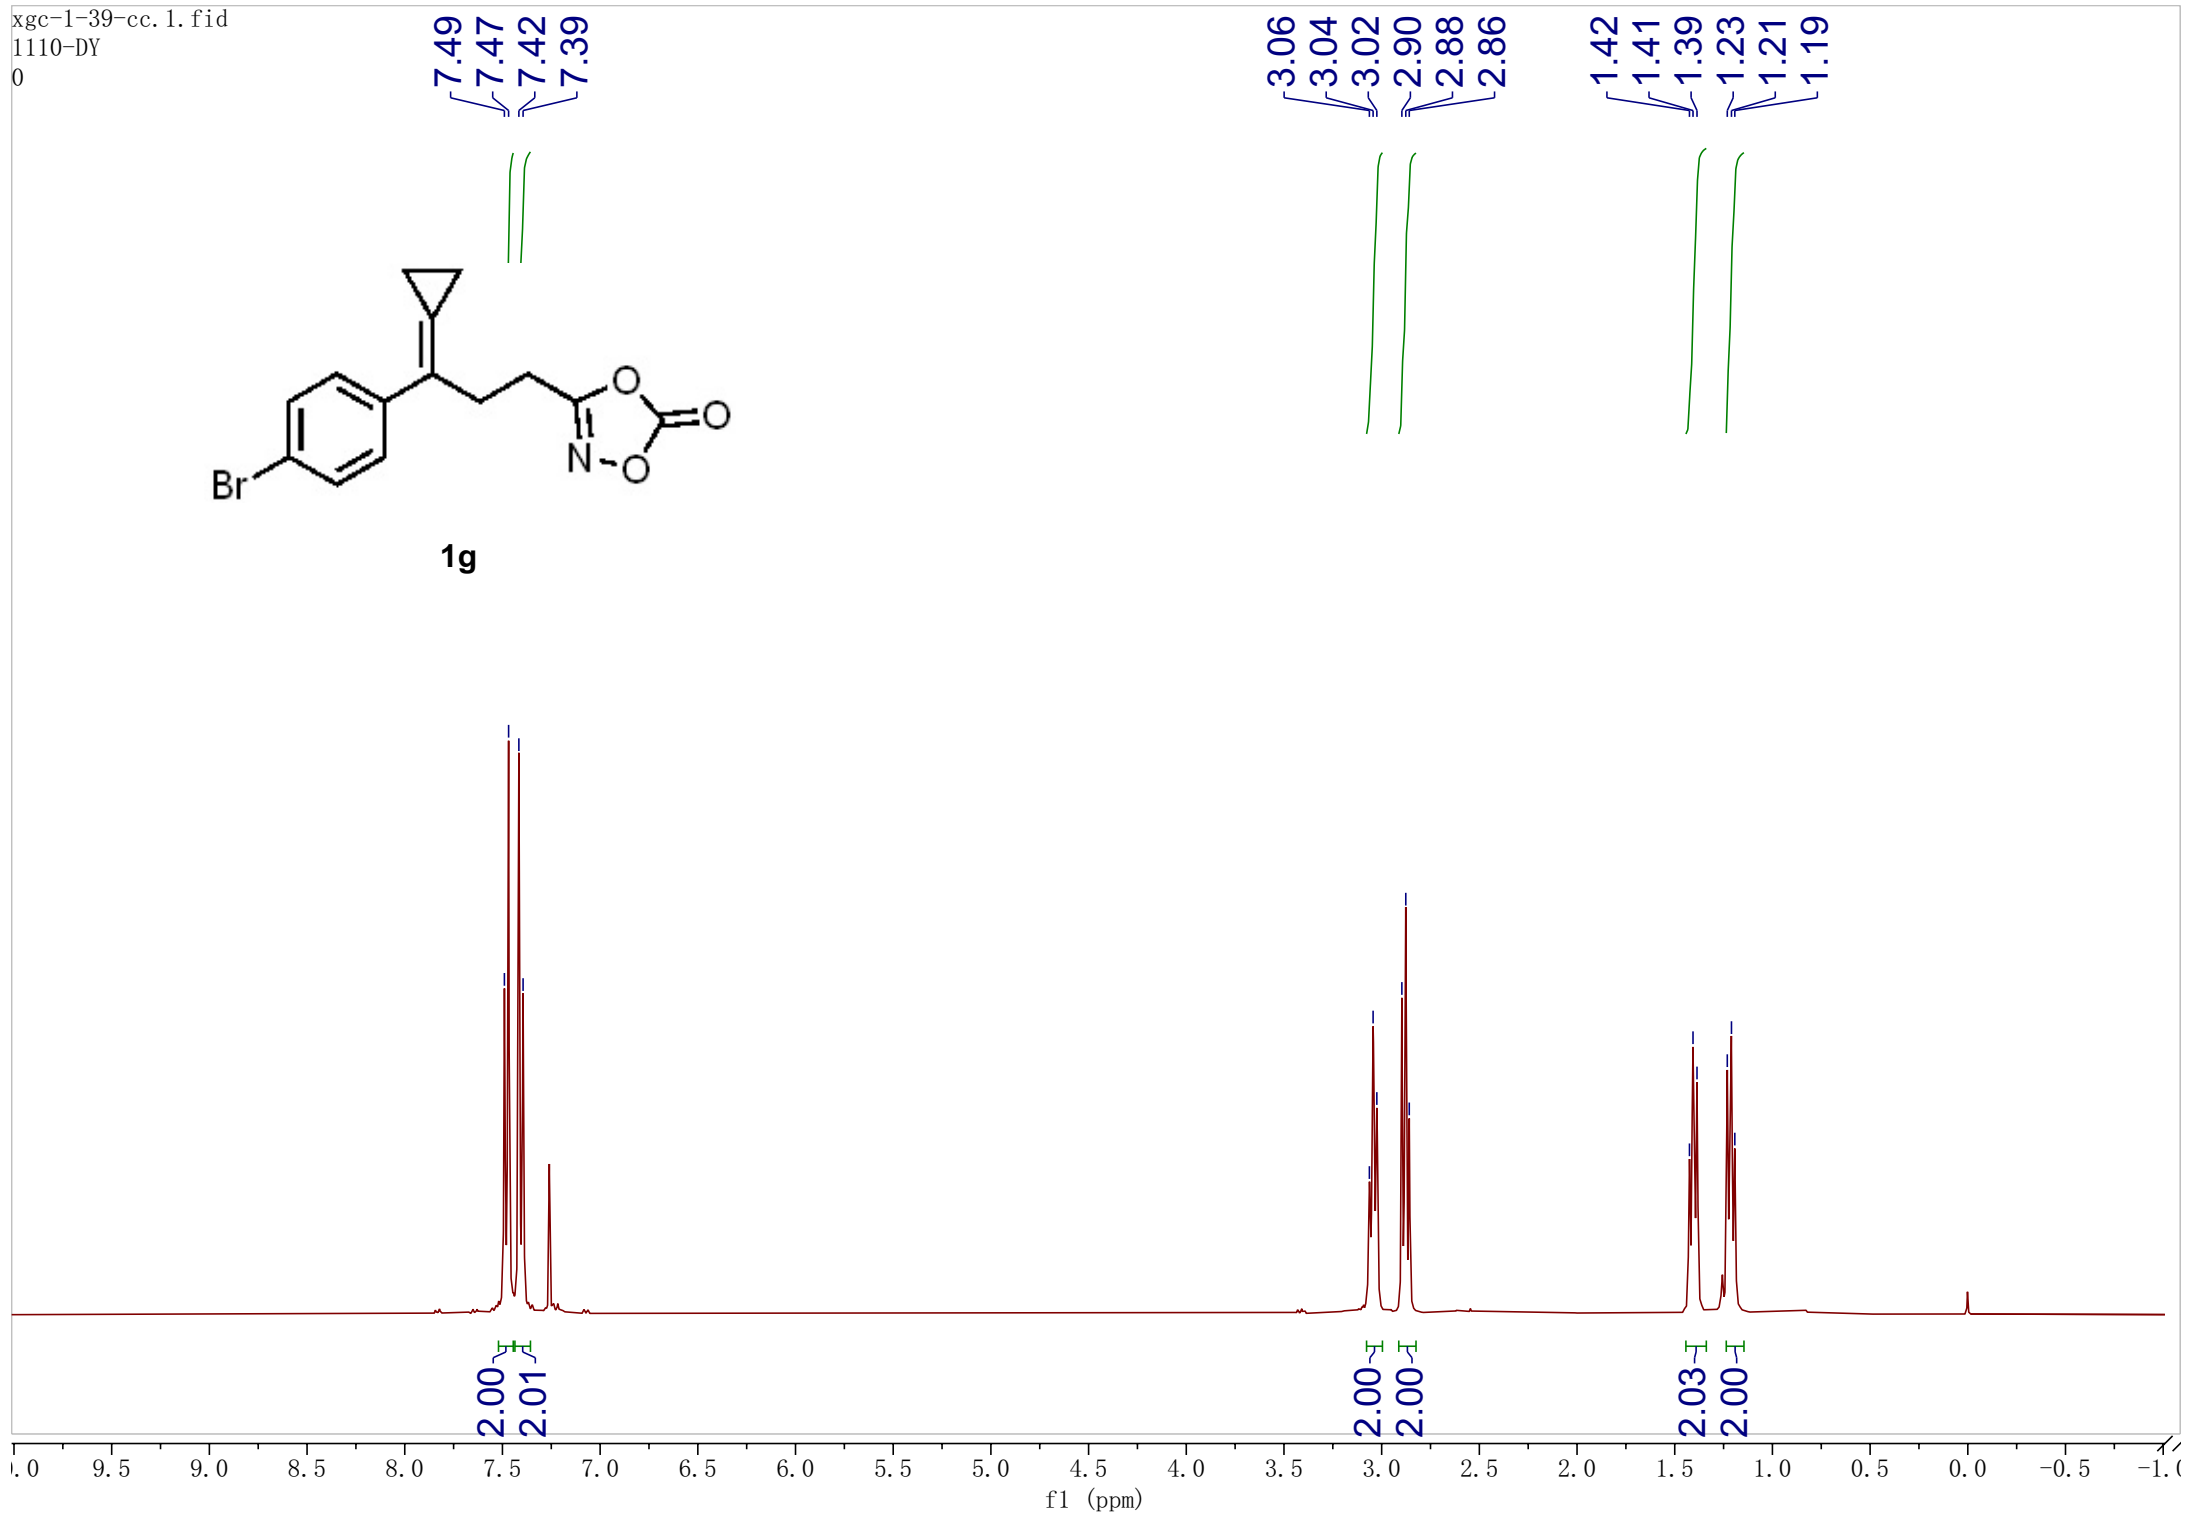

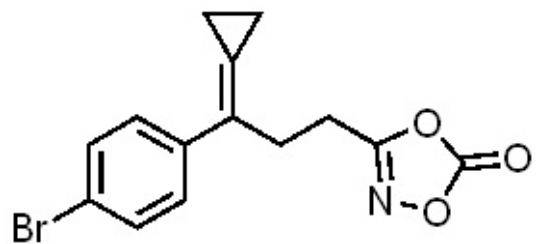

1g

— 166.33  
— 154.14  
/ 137.59  
/ 131.73  
/ 127.47  
/ 124.35  
~ 123.36  
\ 121.16

— 28.77  
— 23.89  
~ 4.80  
~ 1.80

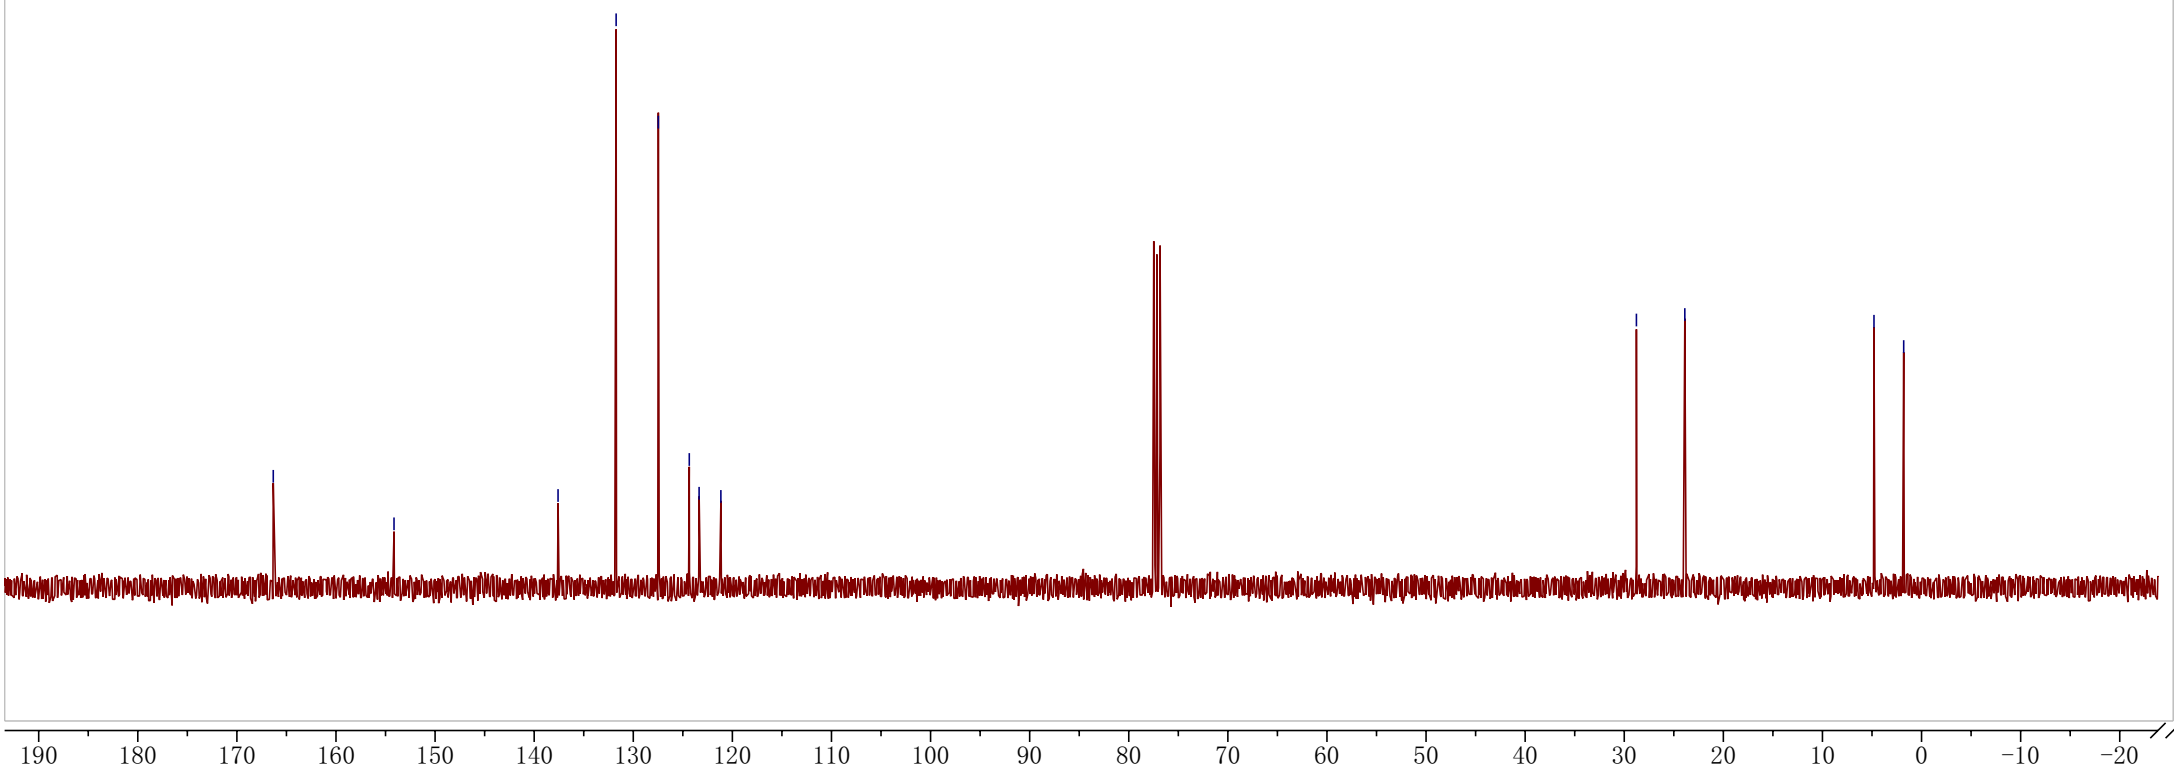

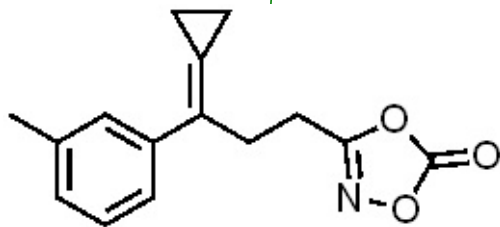

1h

7.33  
7.32  
7.32  
7.31  
7.24  
7.23  
7.22  
7.08  
7.06

3.07  
3.05  
3.03  
2.88  
2.86  
2.84  
2.36

1.42  
1.40  
1.38  
1.20  
1.18  
1.16

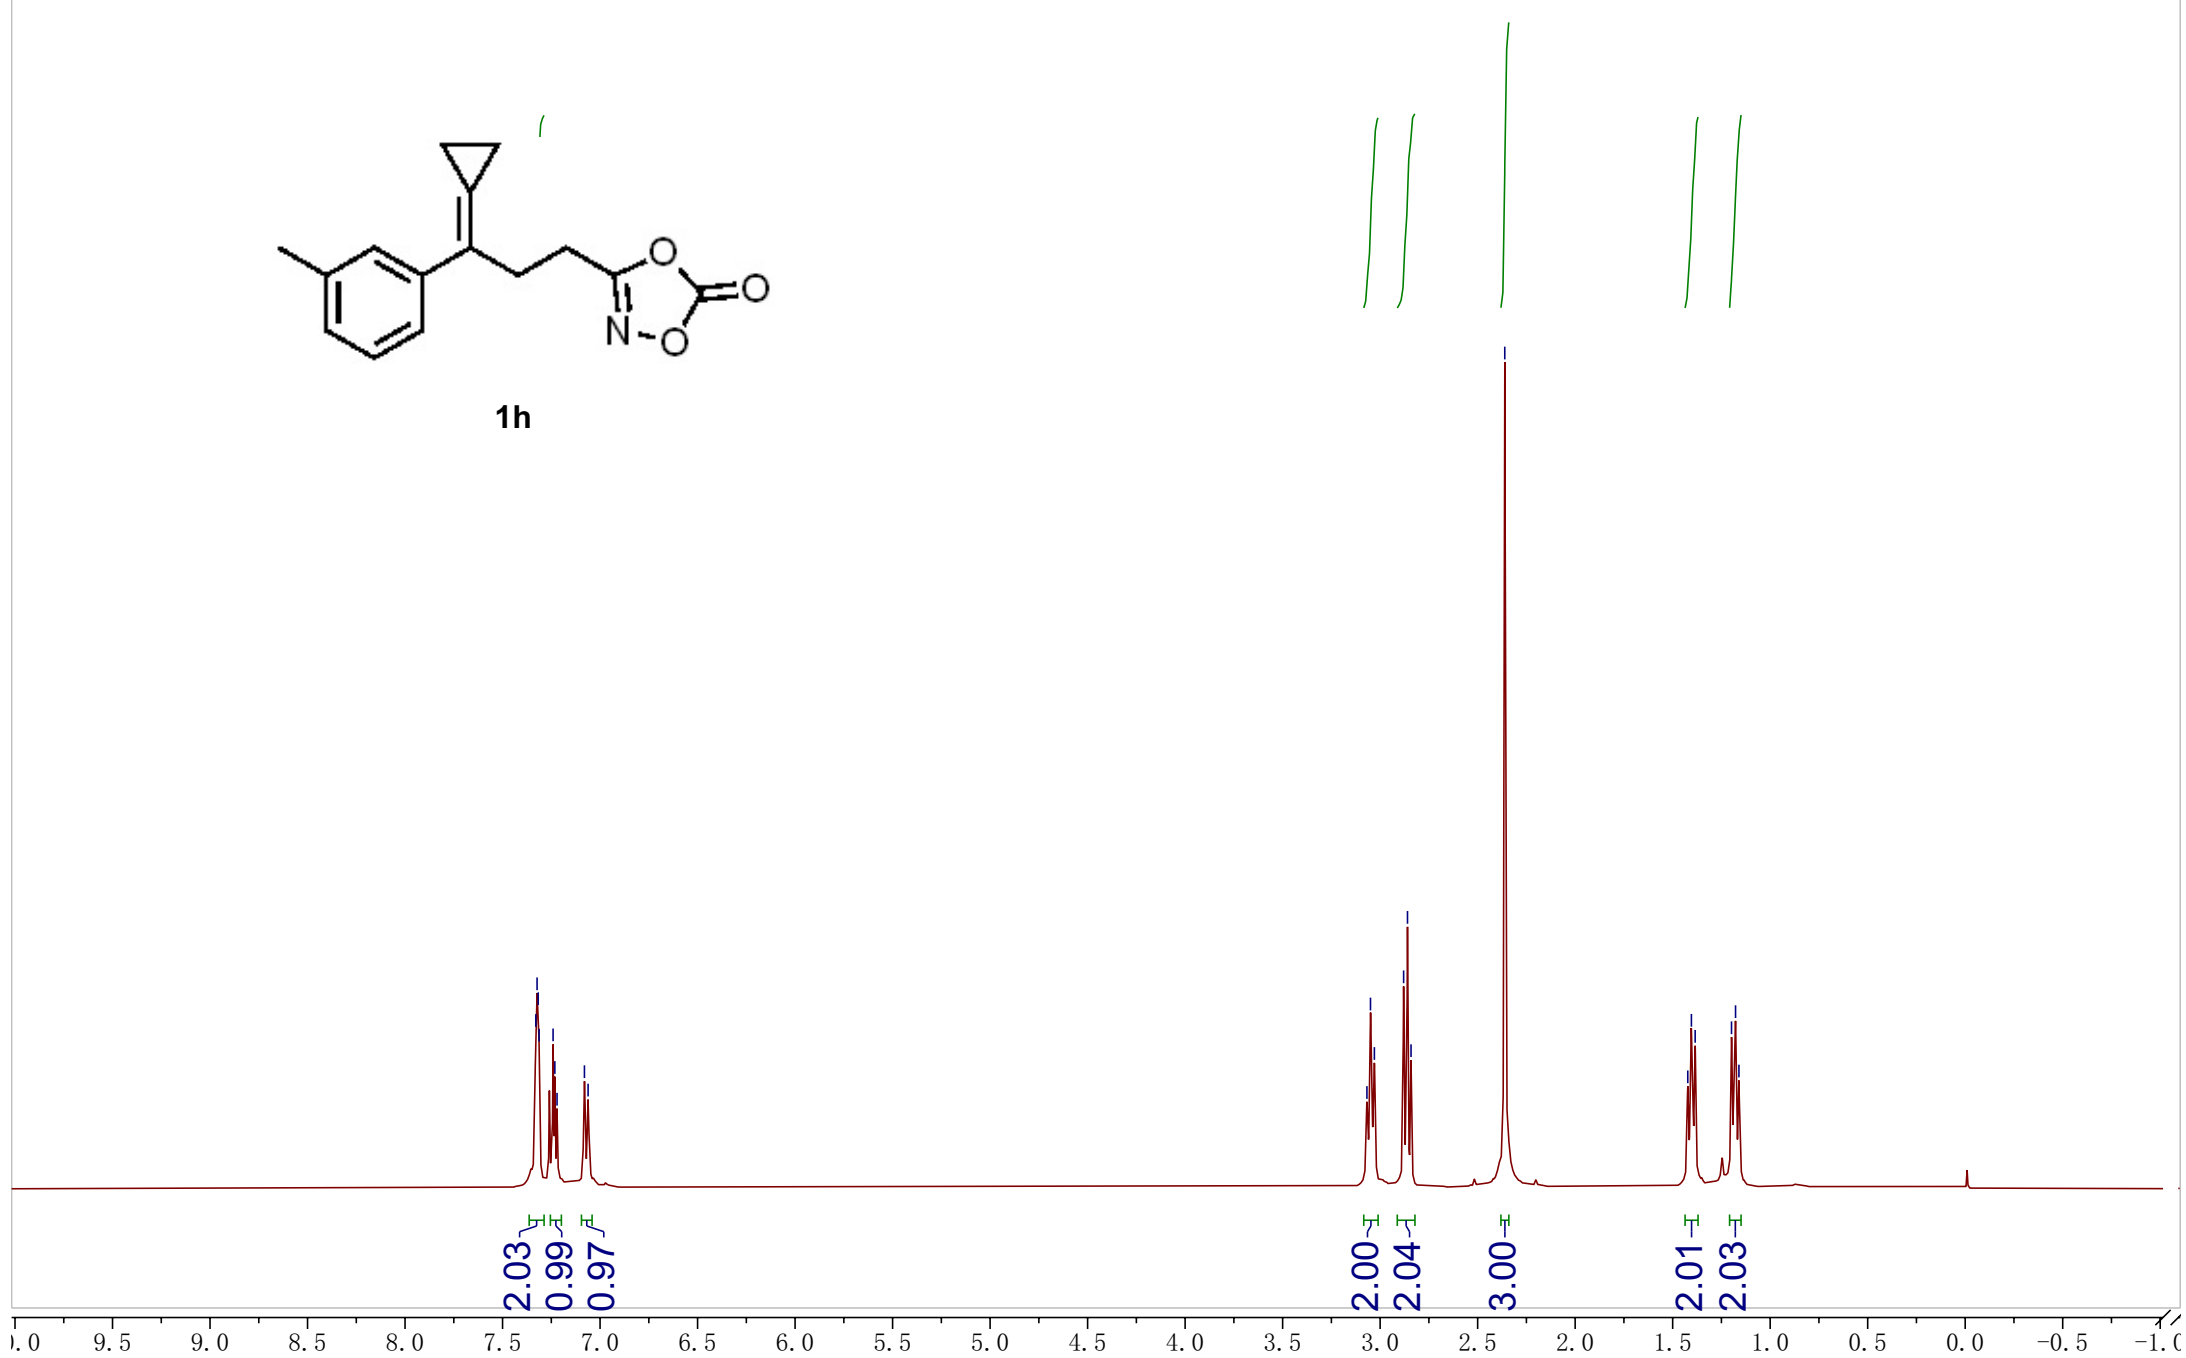

f1 (ppm)

125

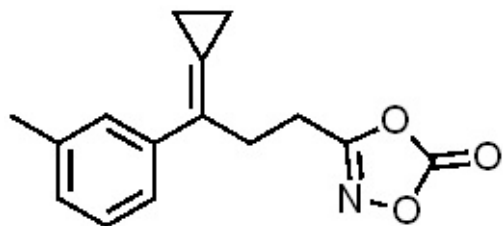

1h

—166.55

—154.26

{138.63

{138.20

{128.56

{128.09

{126.58

{124.35

{123.18

{123.09

~29.08

~24.10

~21.72

~4.81

~1.63

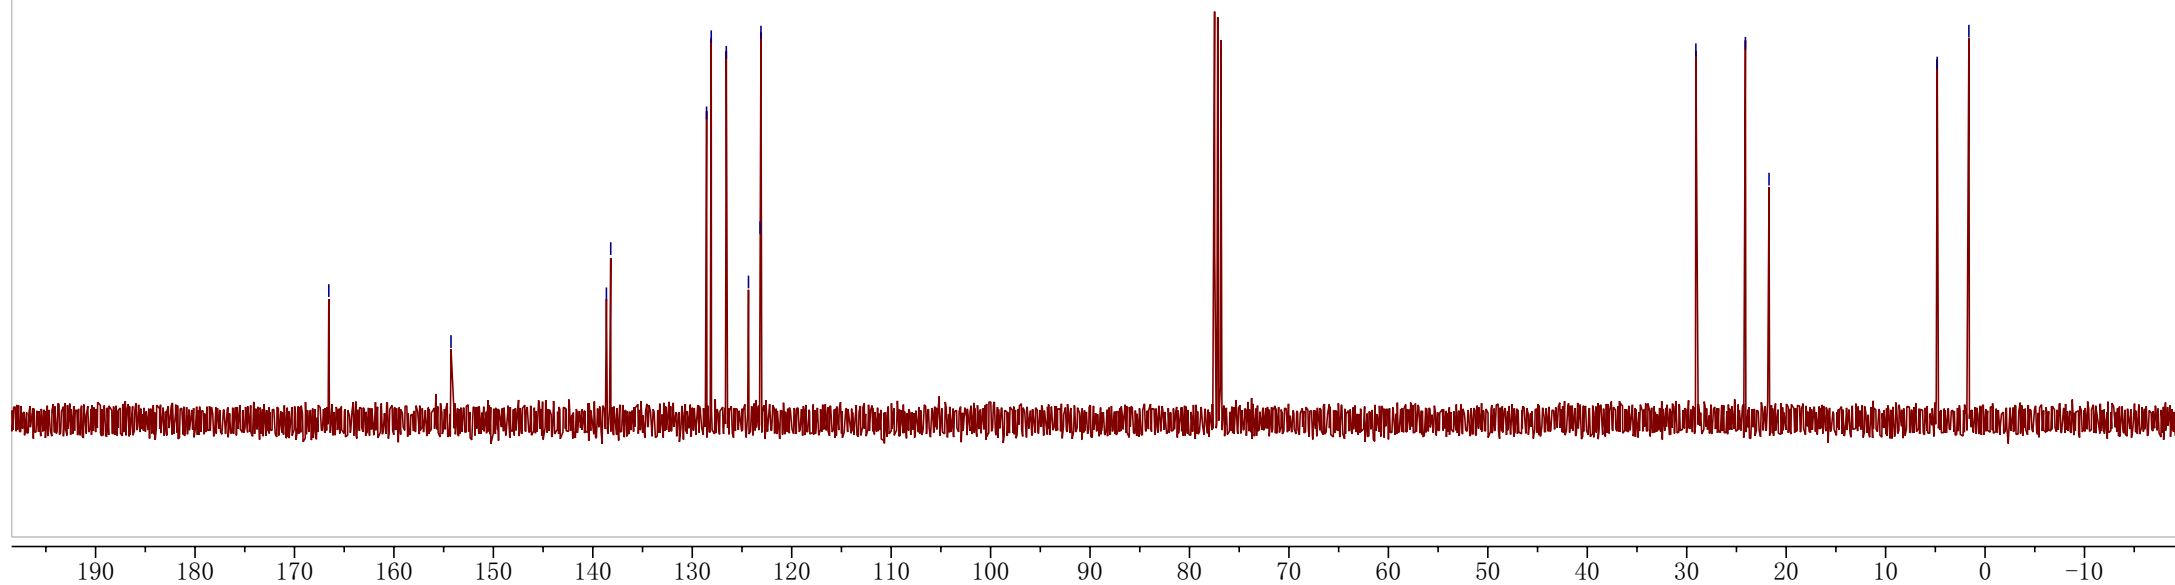

f1 (ppm)

126

xgc-1-137\_1.fid  
1110-DY  
0

7.34  
7.32  
7.31  
7.29  
7.26  
7.24  
7.23  
6.97  
6.95  
6.93

3.06  
3.04  
3.02  
2.90  
2.88  
2.86

1.45  
1.43  
1.41  
1.24  
1.22  
1.20

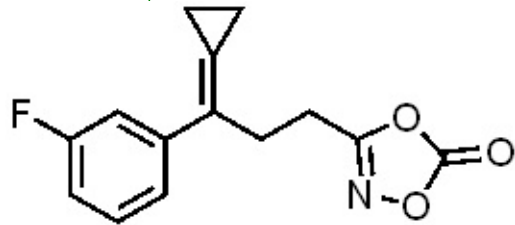

1i

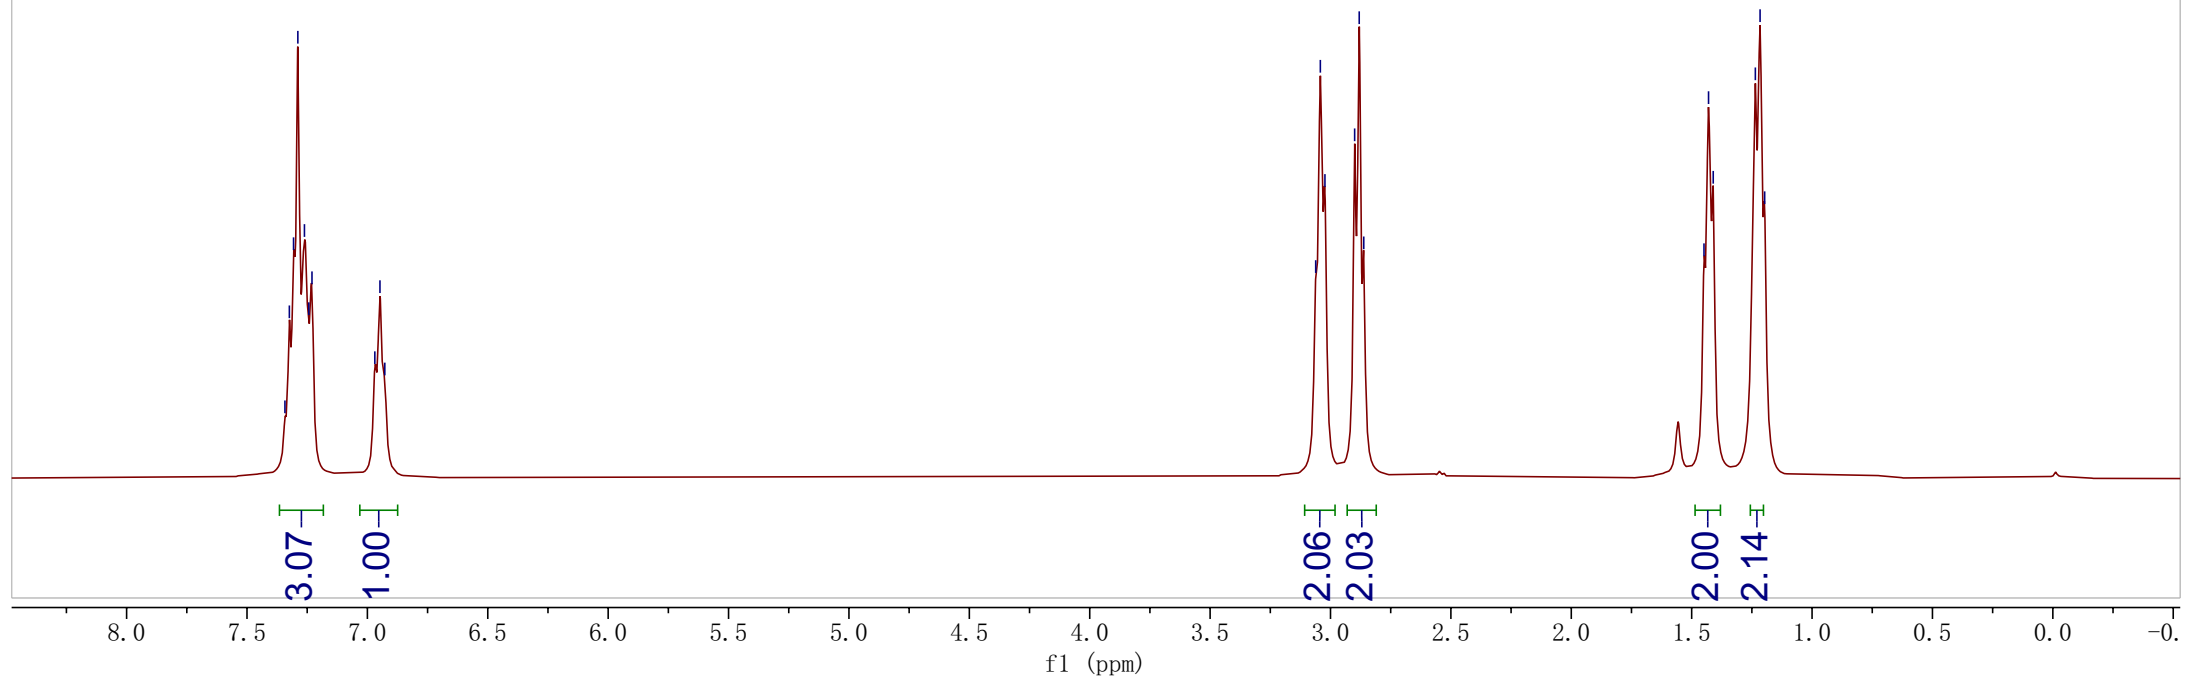

166.36  
164.43  
154.18  
141.05  
130.17  
130.08  
124.97  
123.43  
123.40  
121.39  
121.36  
114.27  
114.06  
112.99  
112.77  
28.90  
23.98  
4.89  
1.74

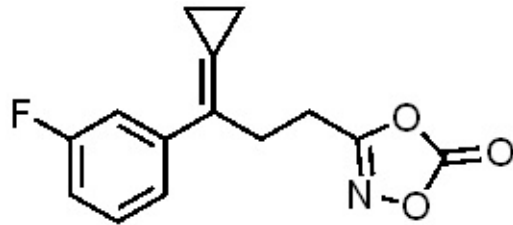

1i

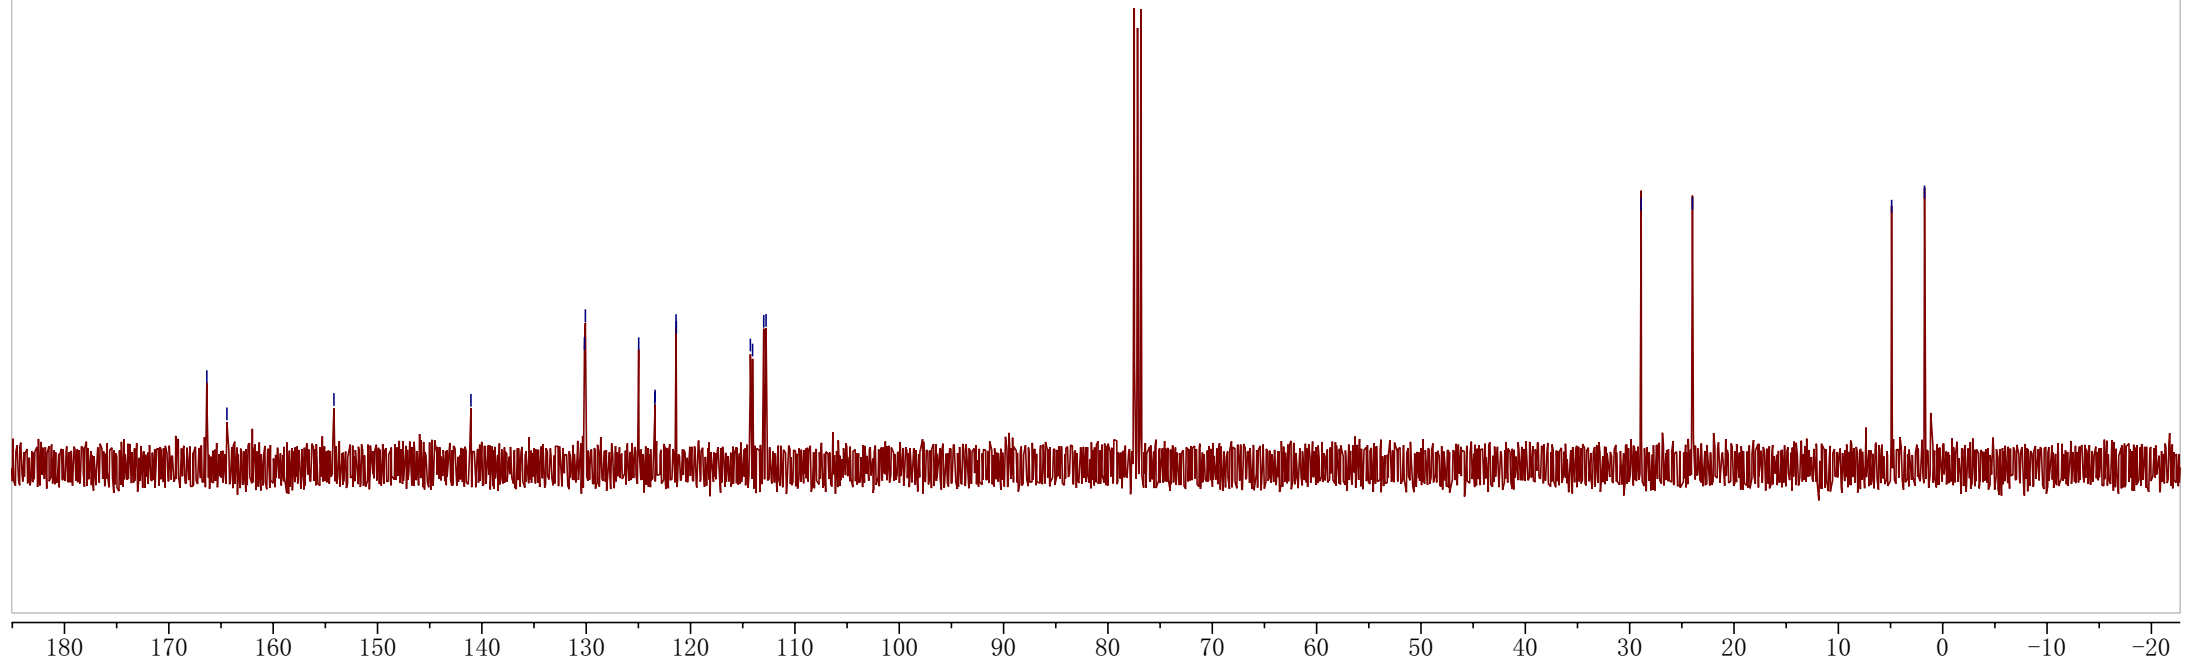

f1 (ppm)

128

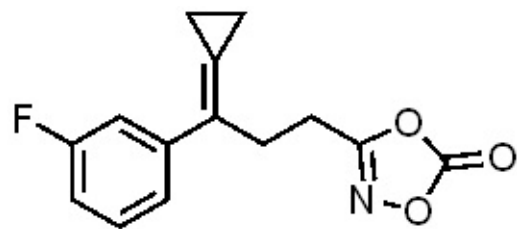

1i

--112.95

100

50

0

-50

-100  
f1 (ppm)

-150

-200

-250

-300

xgc-1-189\_1.fid  
1110-DY  
0

9.48  
9.45  
9.44  
9.43  
9.14  
9.13  
9.12  
9.11  
9.11  
9.10  
9.09  
9.09  
9.08  
9.07  
9.06

4.83  
4.81  
4.79  
4.57  
4.55  
4.53

3.16  
3.14  
3.12  
2.87  
2.86

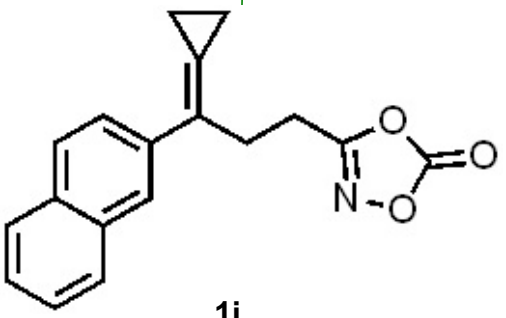

1j

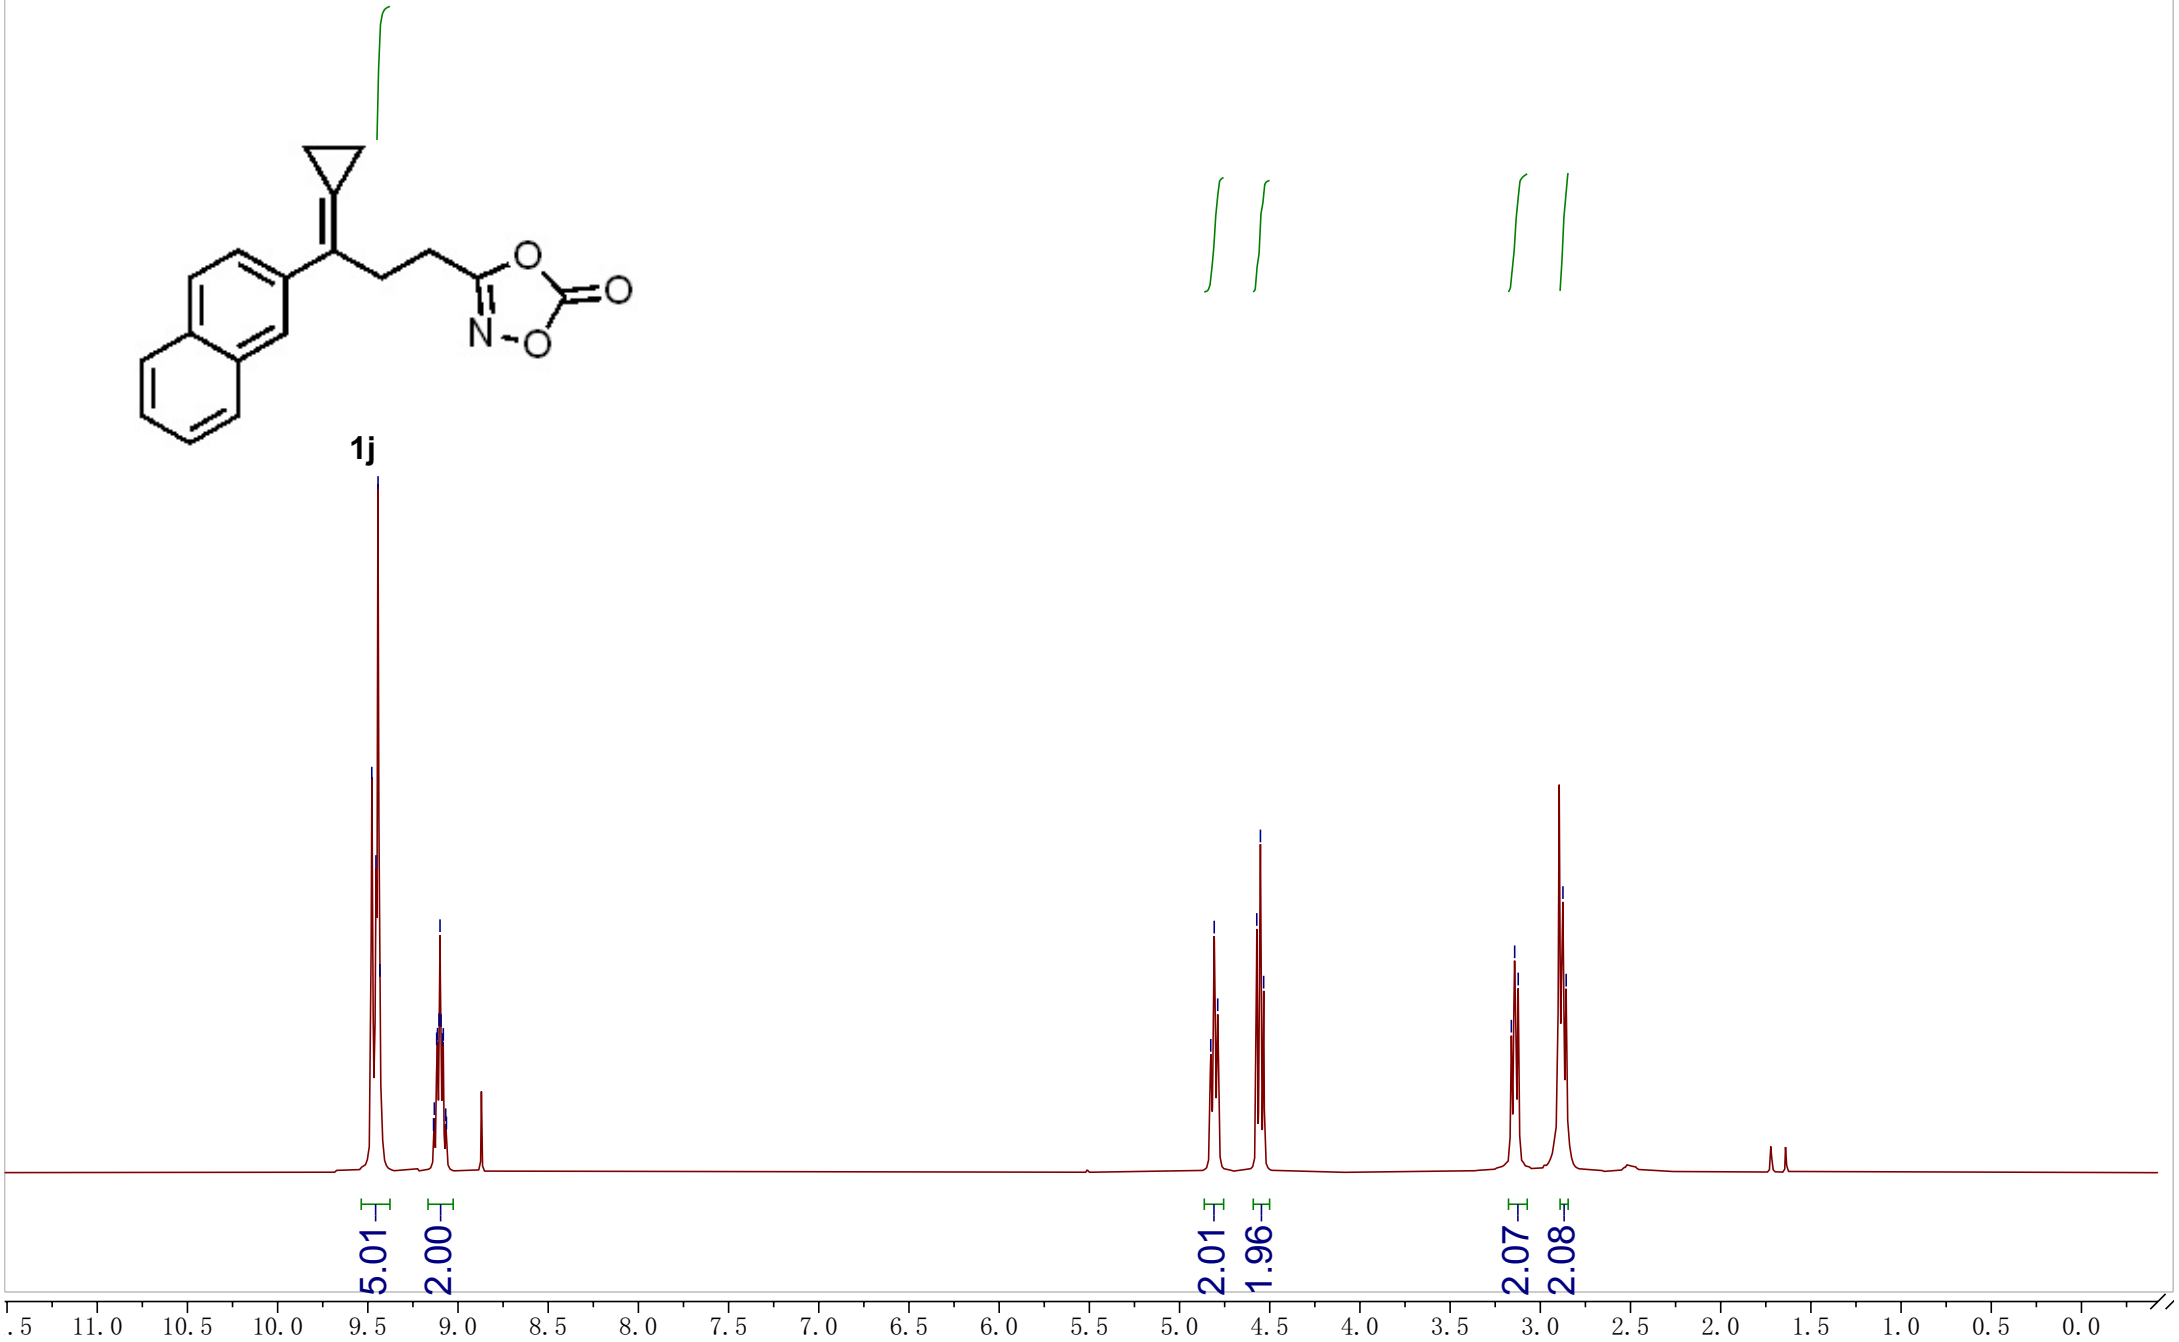

5.01

2.00

2.01

1.96

2.07

2.08

f1 (ppm)

130

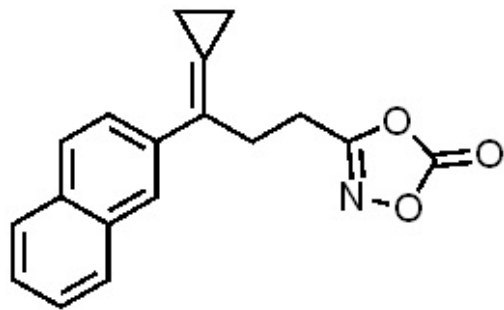

1j

166.53  
154.24  
136.03  
133.54  
132.67  
128.23  
128.20  
127.68  
126.43  
126.09  
124.62  
124.33  
124.27  
124.00

29.05  
24.11

5.15  
1.72

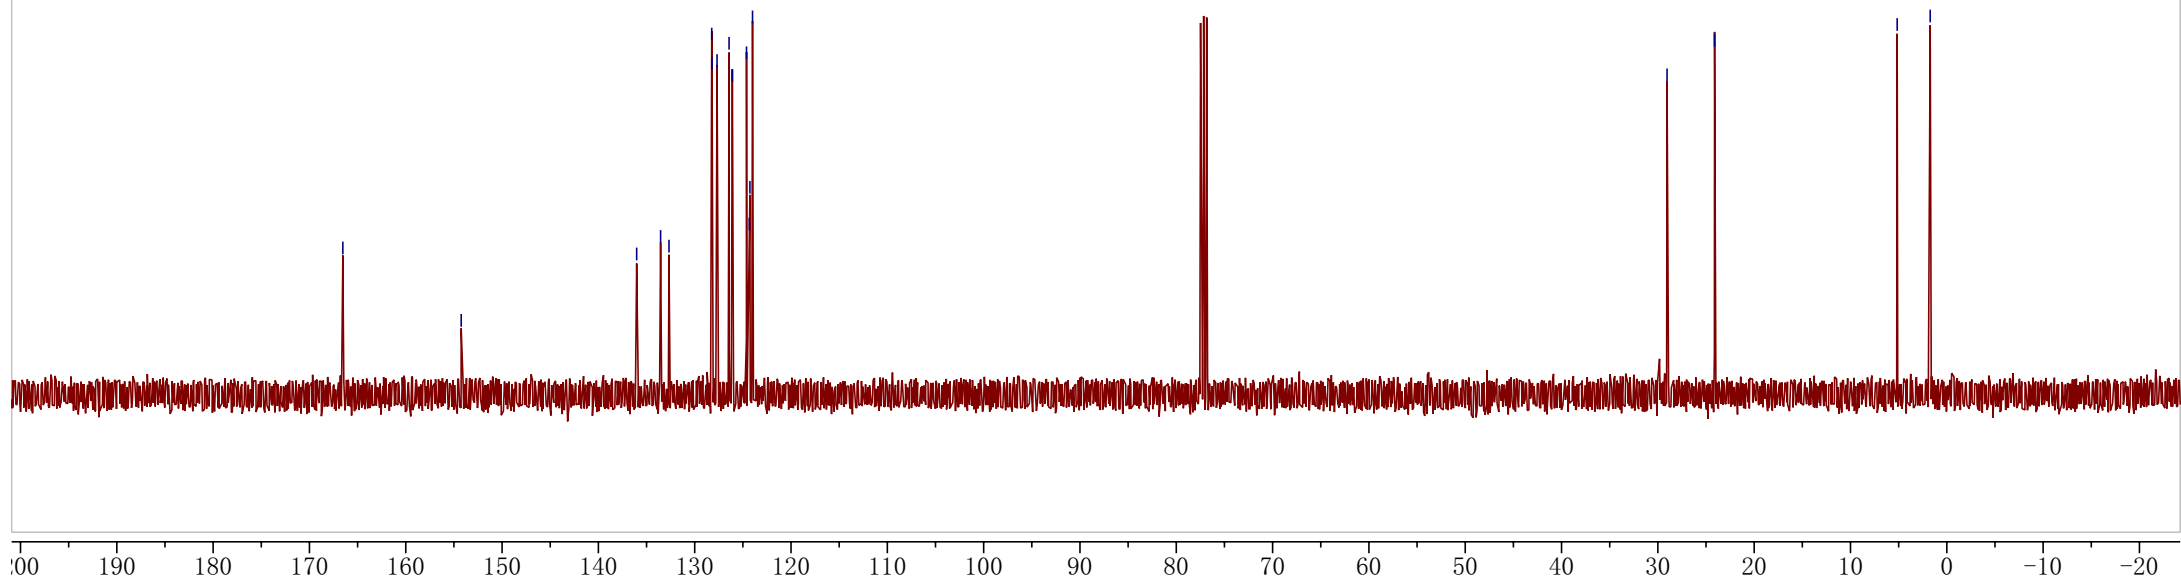

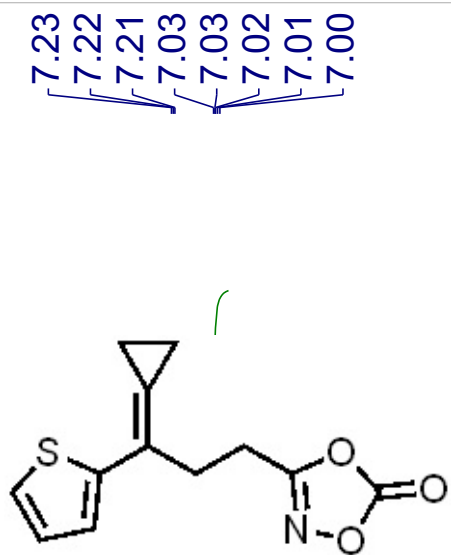

1k

7.23  
7.22  
7.21  
7.03  
7.03  
7.02  
7.01  
7.00

3.07  
3.06  
3.06  
3.04  
3.04  
3.03  
3.02  
3.01  
3.00  
2.99  
2.98

1.40  
1.39  
1.39  
1.38  
1.37  
1.37  
1.35  
1.35  
1.34  
1.33  
1.33  
1.32  
1.31

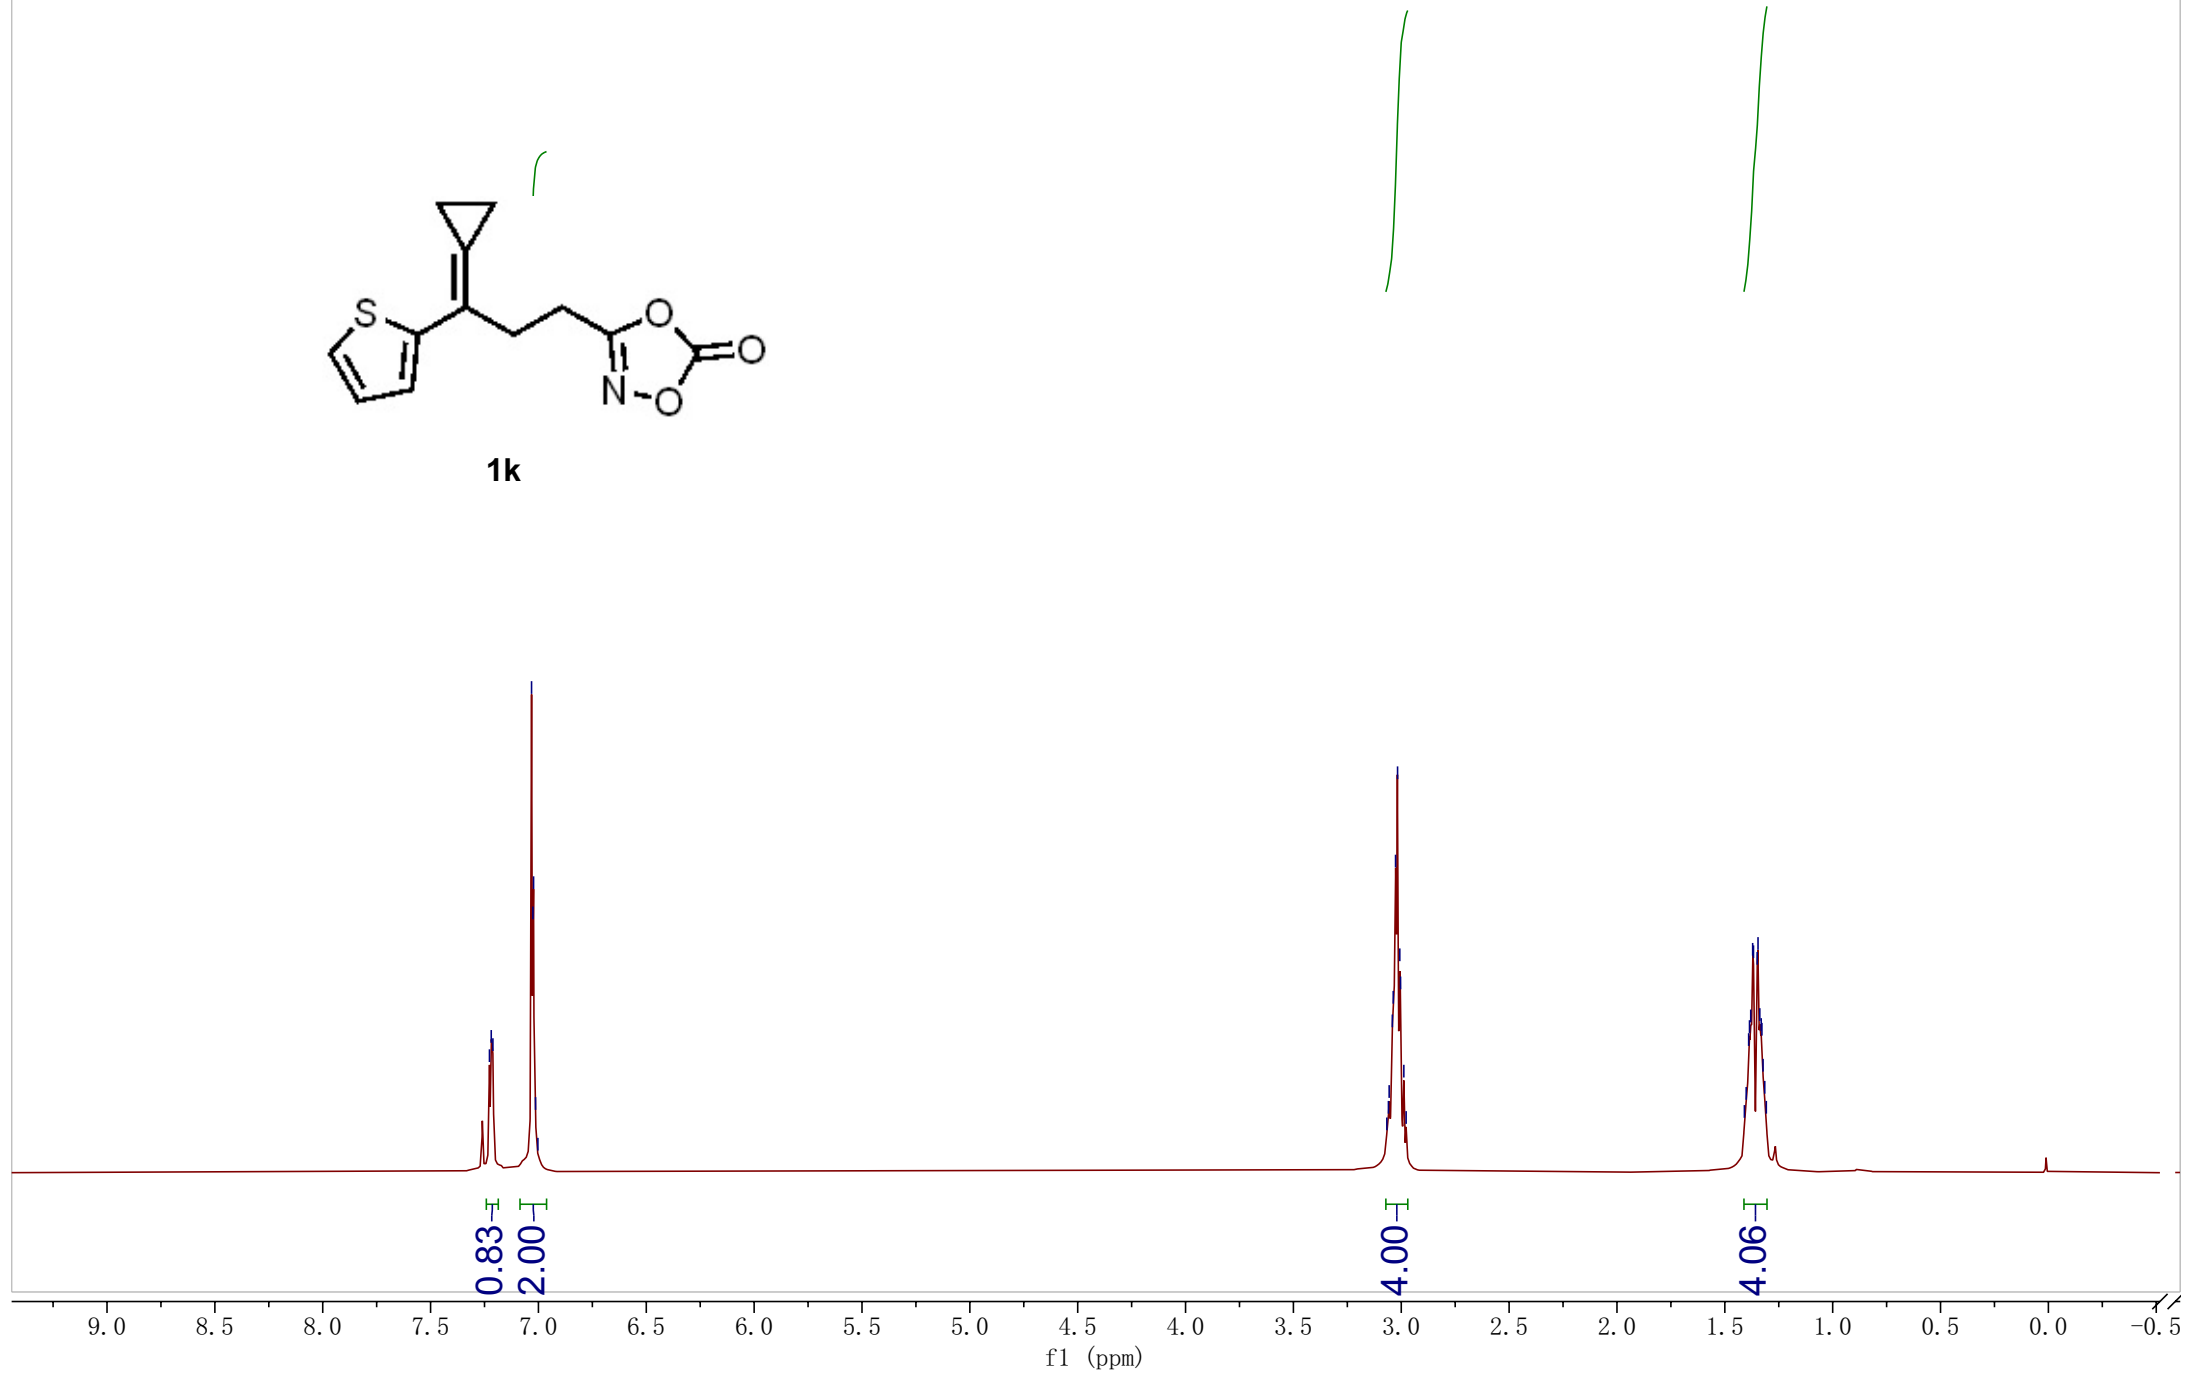

f1 (ppm)

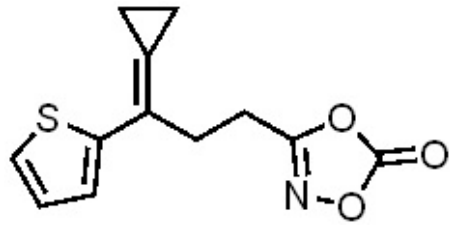

1k

—166.38

—154.18

—144.53

127.21

124.92

122.07

122.04

120.00

—28.80

—23.95

~5.00

~3.31

190 180 170 160 150 140 130 120 110 100 90 80 70 60 50 40 30 20 10 0 -1

f1 (ppm)

133

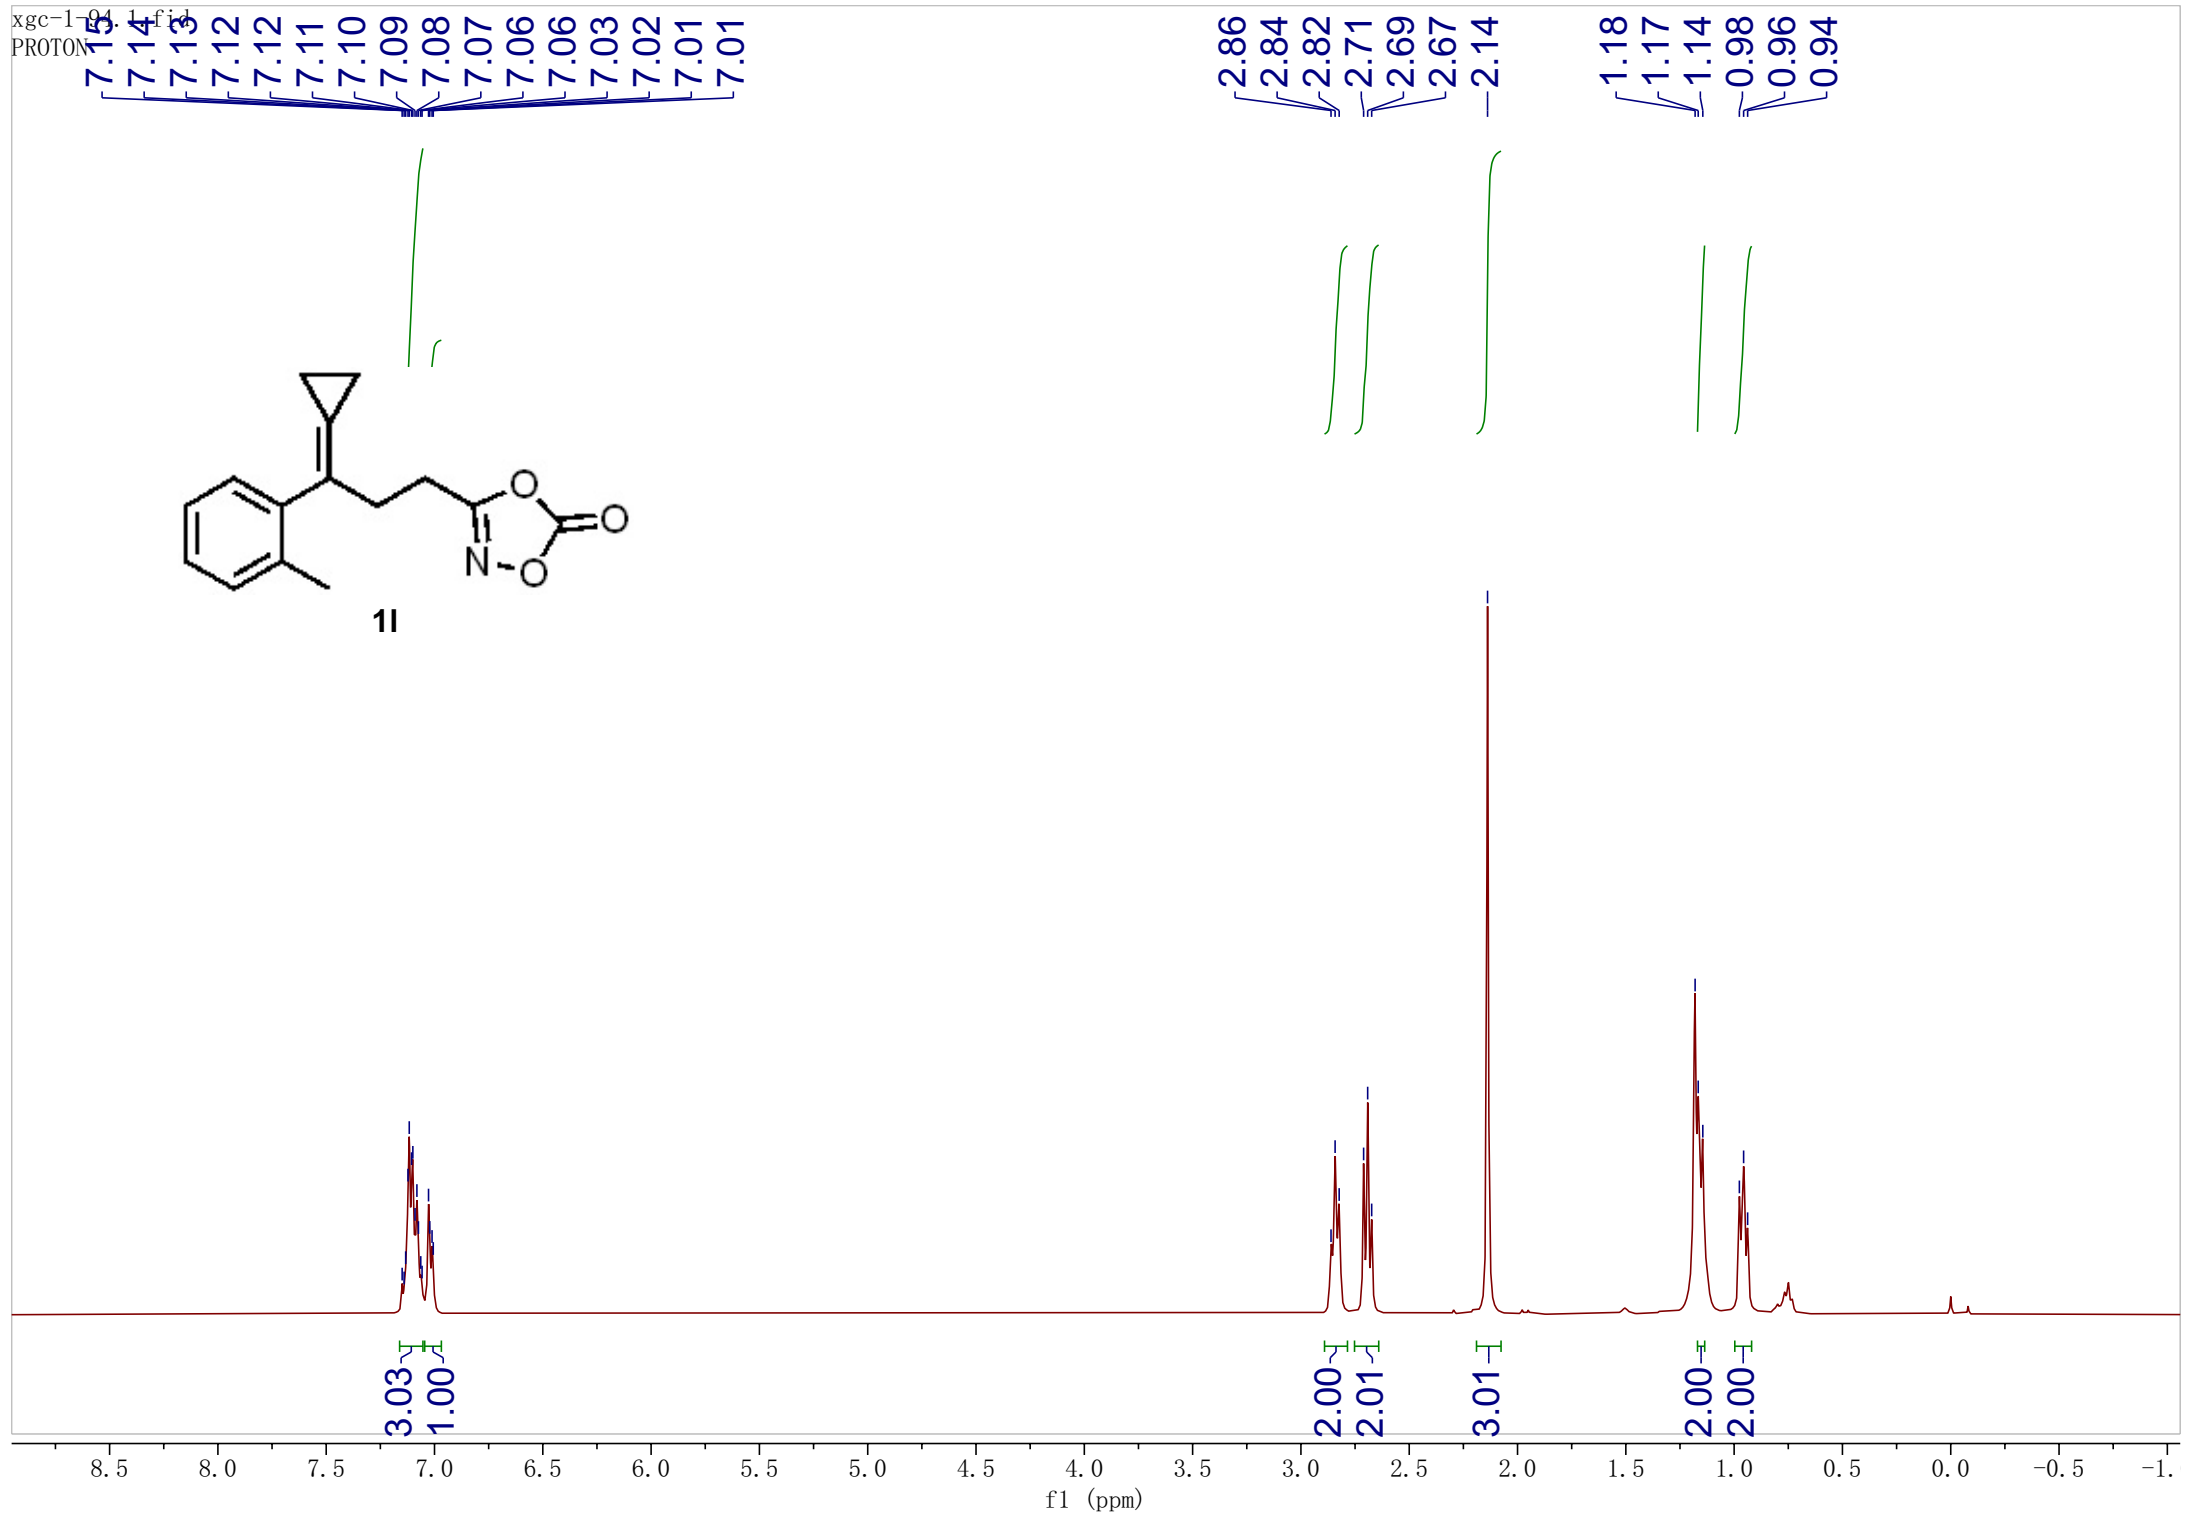

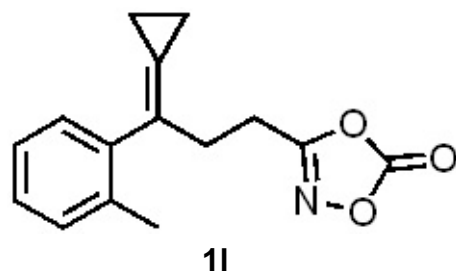

— 166.54  
— 154.19  
{ 140.19  
{ 135.76  
{ 130.50  
{ 128.50  
{ 127.32  
{ 125.82  
{ 125.75  
{ 123.65

{ 31.60  
{ 23.63  
{ 19.92  
  
{ 3.29  
{ 2.98

190 180 170 160 150 140 130 120 110 100 90 80 70 60 50 40 30 20 10 0 -10 -2

f1 (ppm)

135

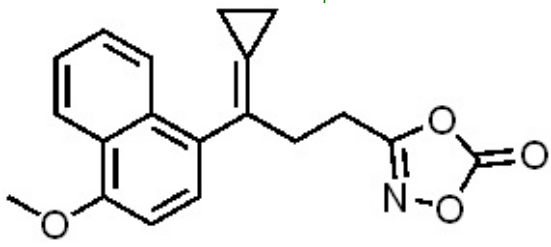

1m

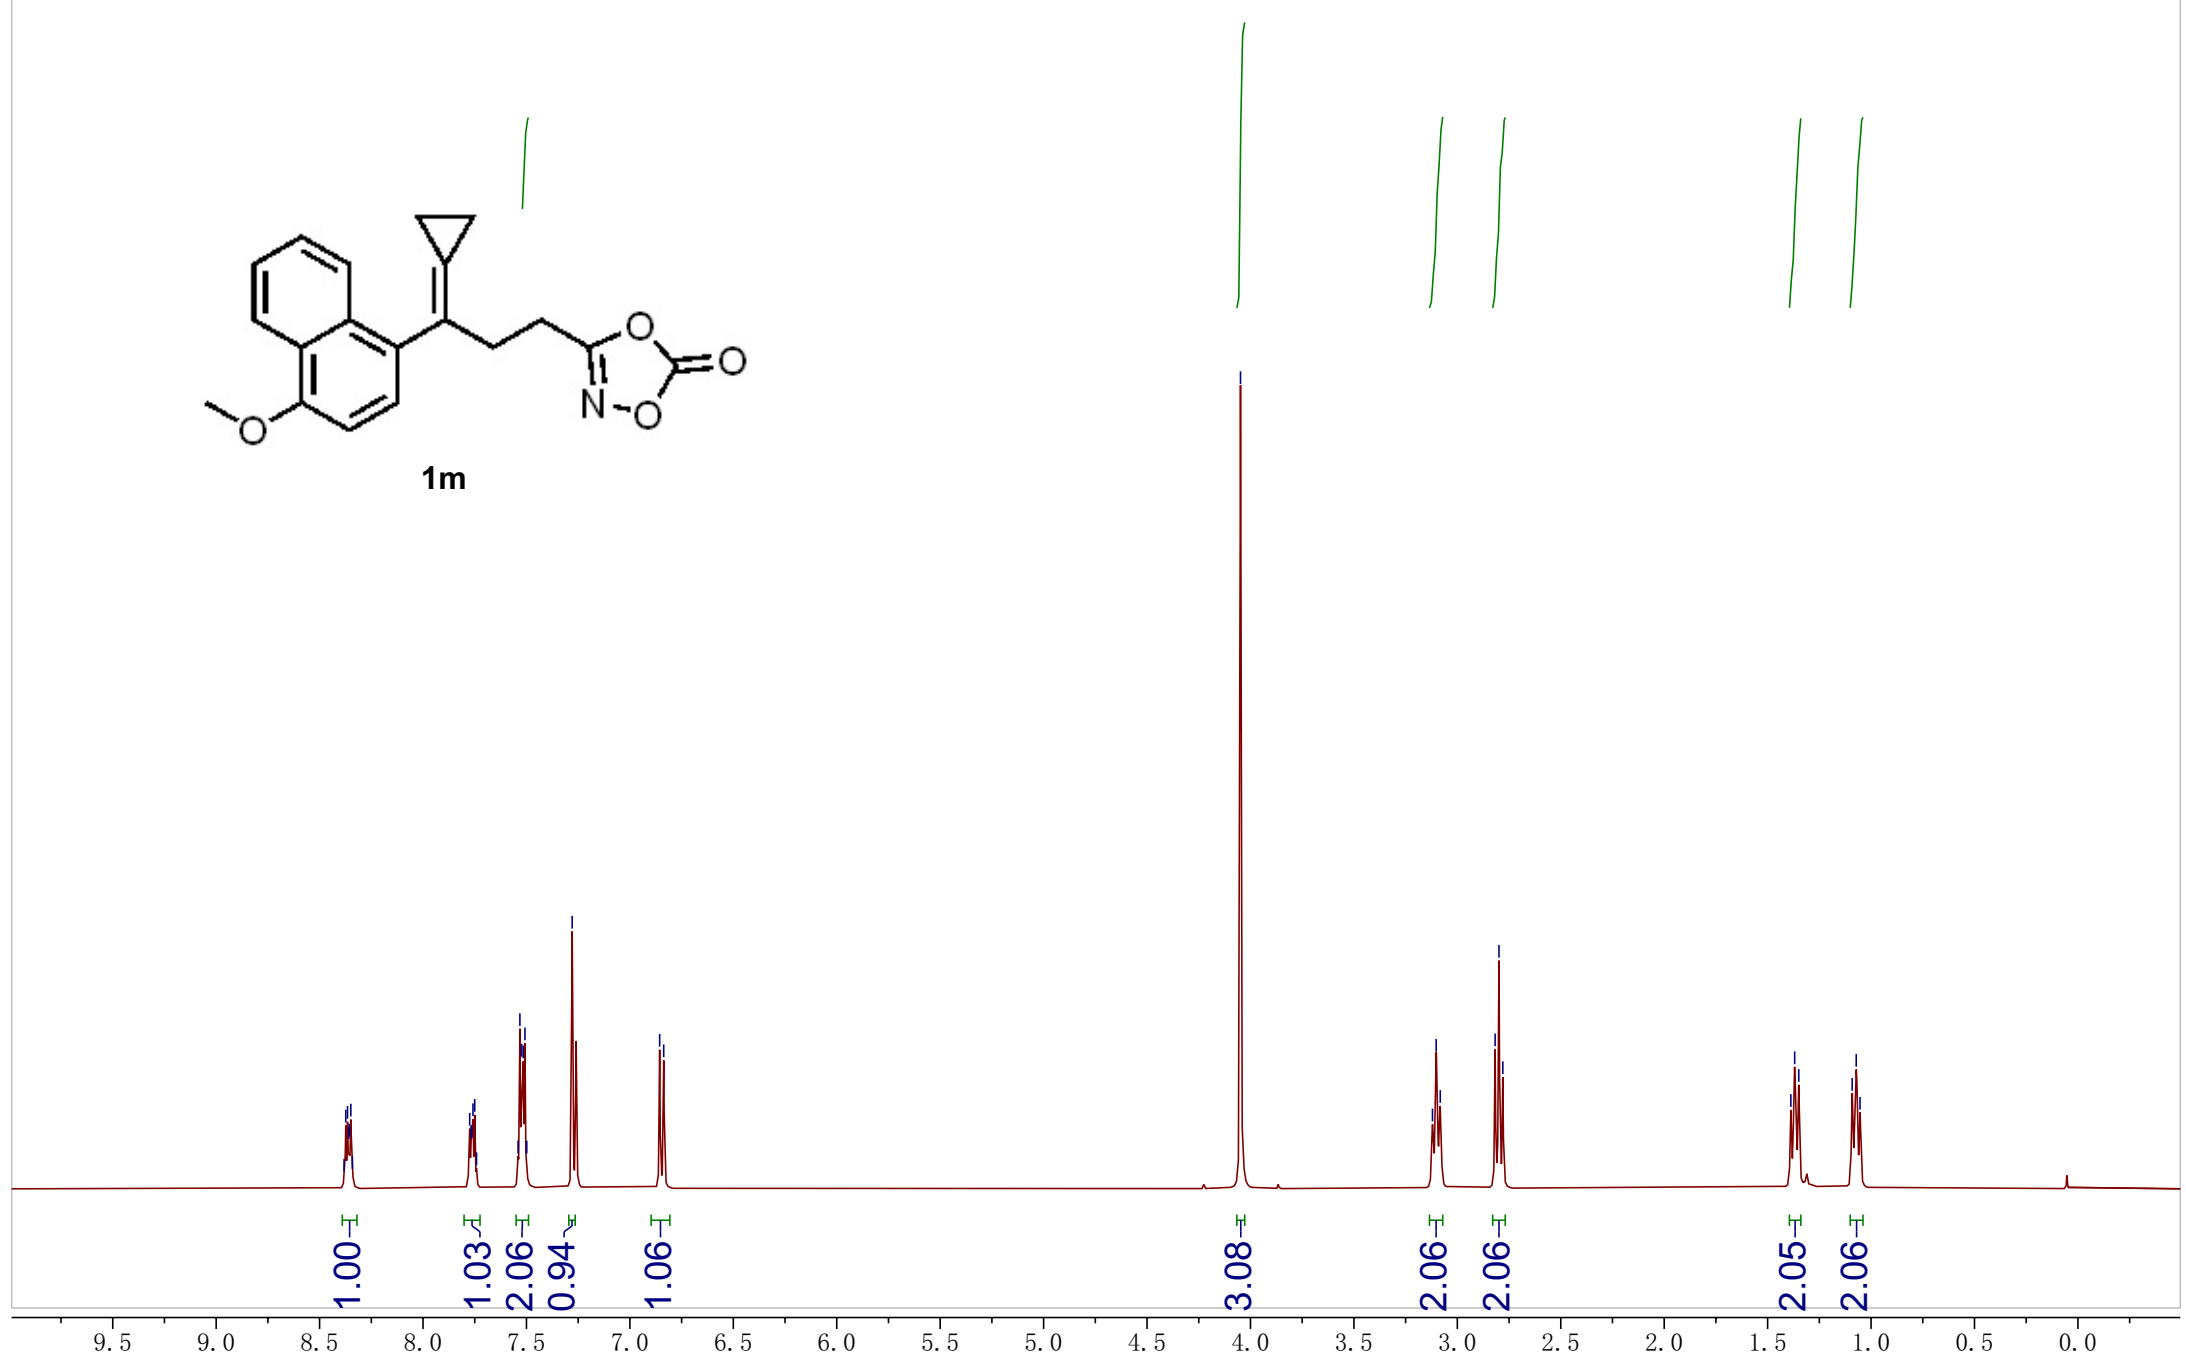

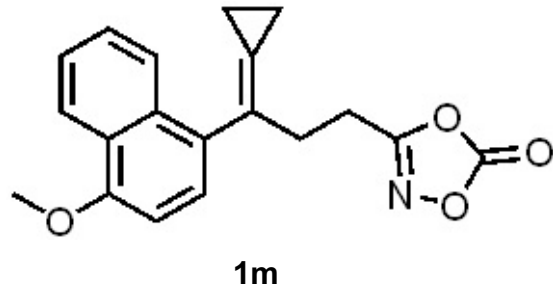

—166.59  
—155.00  
—154.24  
—132.28  
—130.71  
—126.57  
—125.93  
—125.72  
—125.24  
—125.23  
—124.88  
—124.62  
—122.58  
—103.34

—55.63

—32.32

—23.82

—3.38  
—3.31

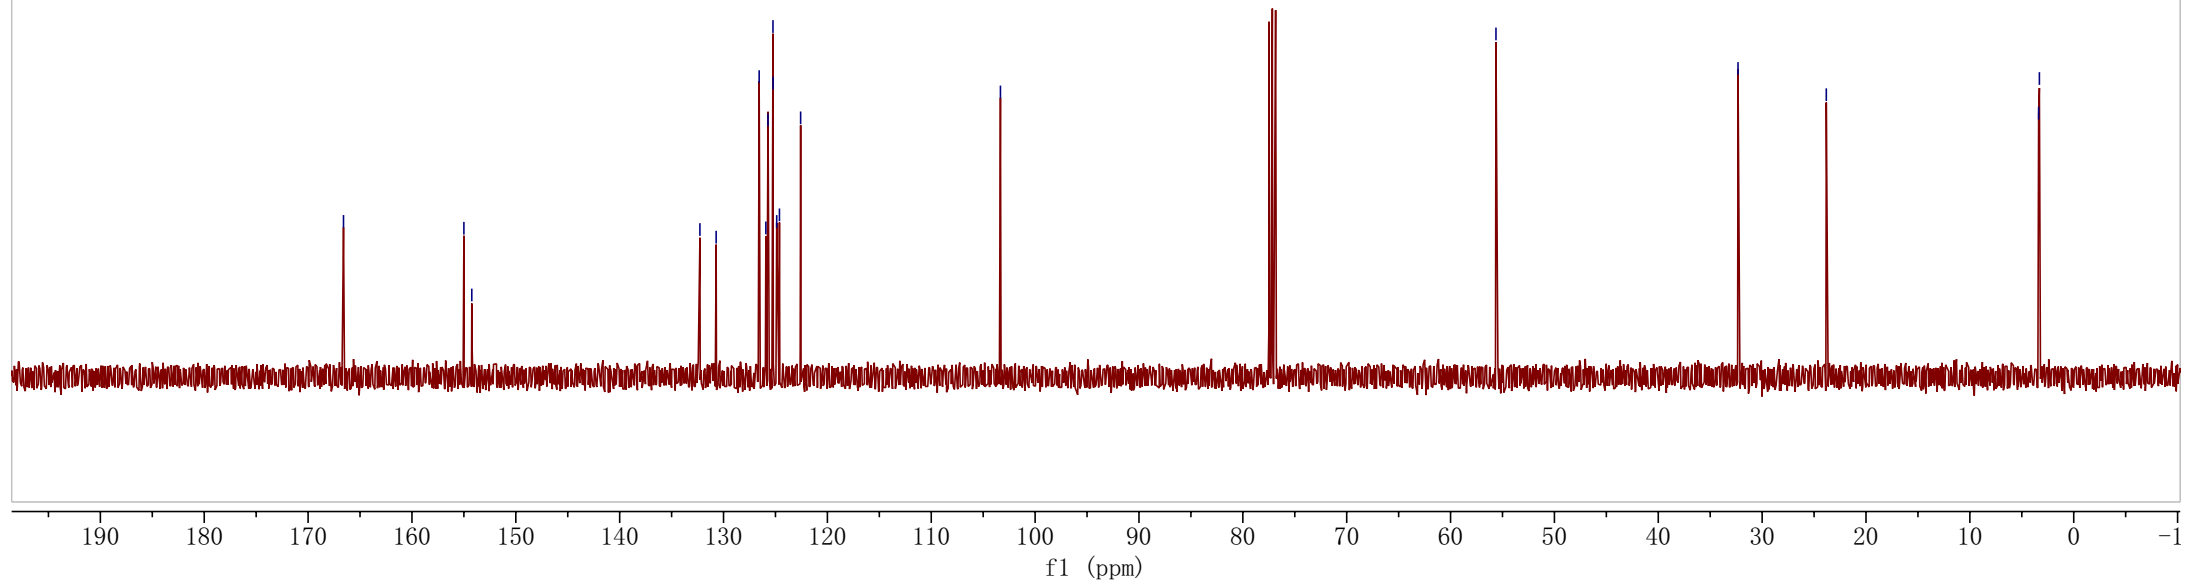

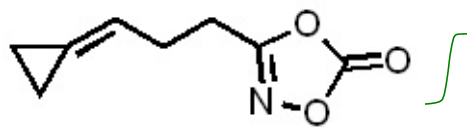

1n

5.79  
5.78  
5.78  
5.77  
5.77  
5.76  
5.75

2.81  
2.79  
2.78  
2.61  
2.59  
2.58  
2.56

-1.05

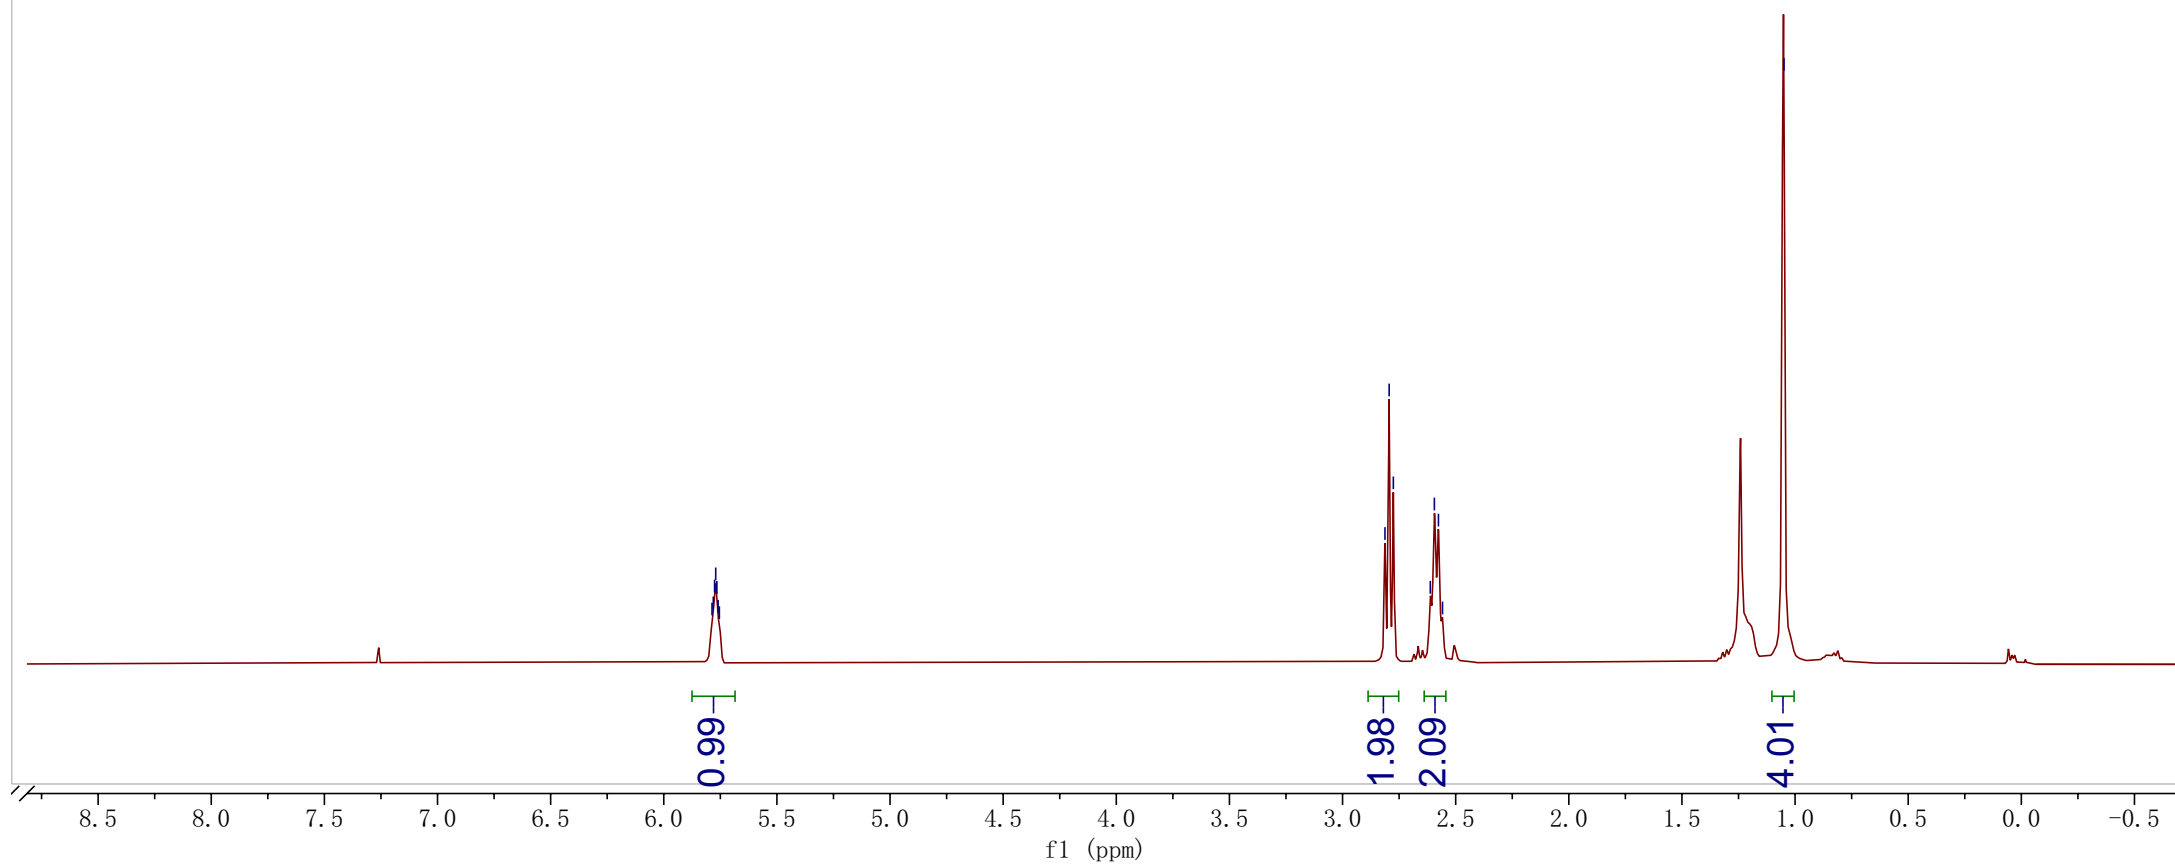

0.99

1.98

2.09

4.01

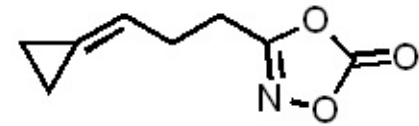

1n

—166.57

—154.30

—124.93

—114.04

~26.74

~24.65

{2.29

{2.15

180 170 160 150 140 130 120 110 100 90 80 70 60 50 40 30 20 10 0 -10

f1 (ppm)

139

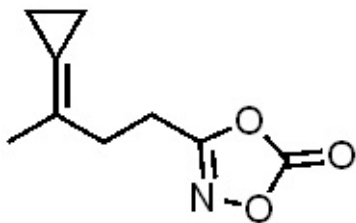

1o

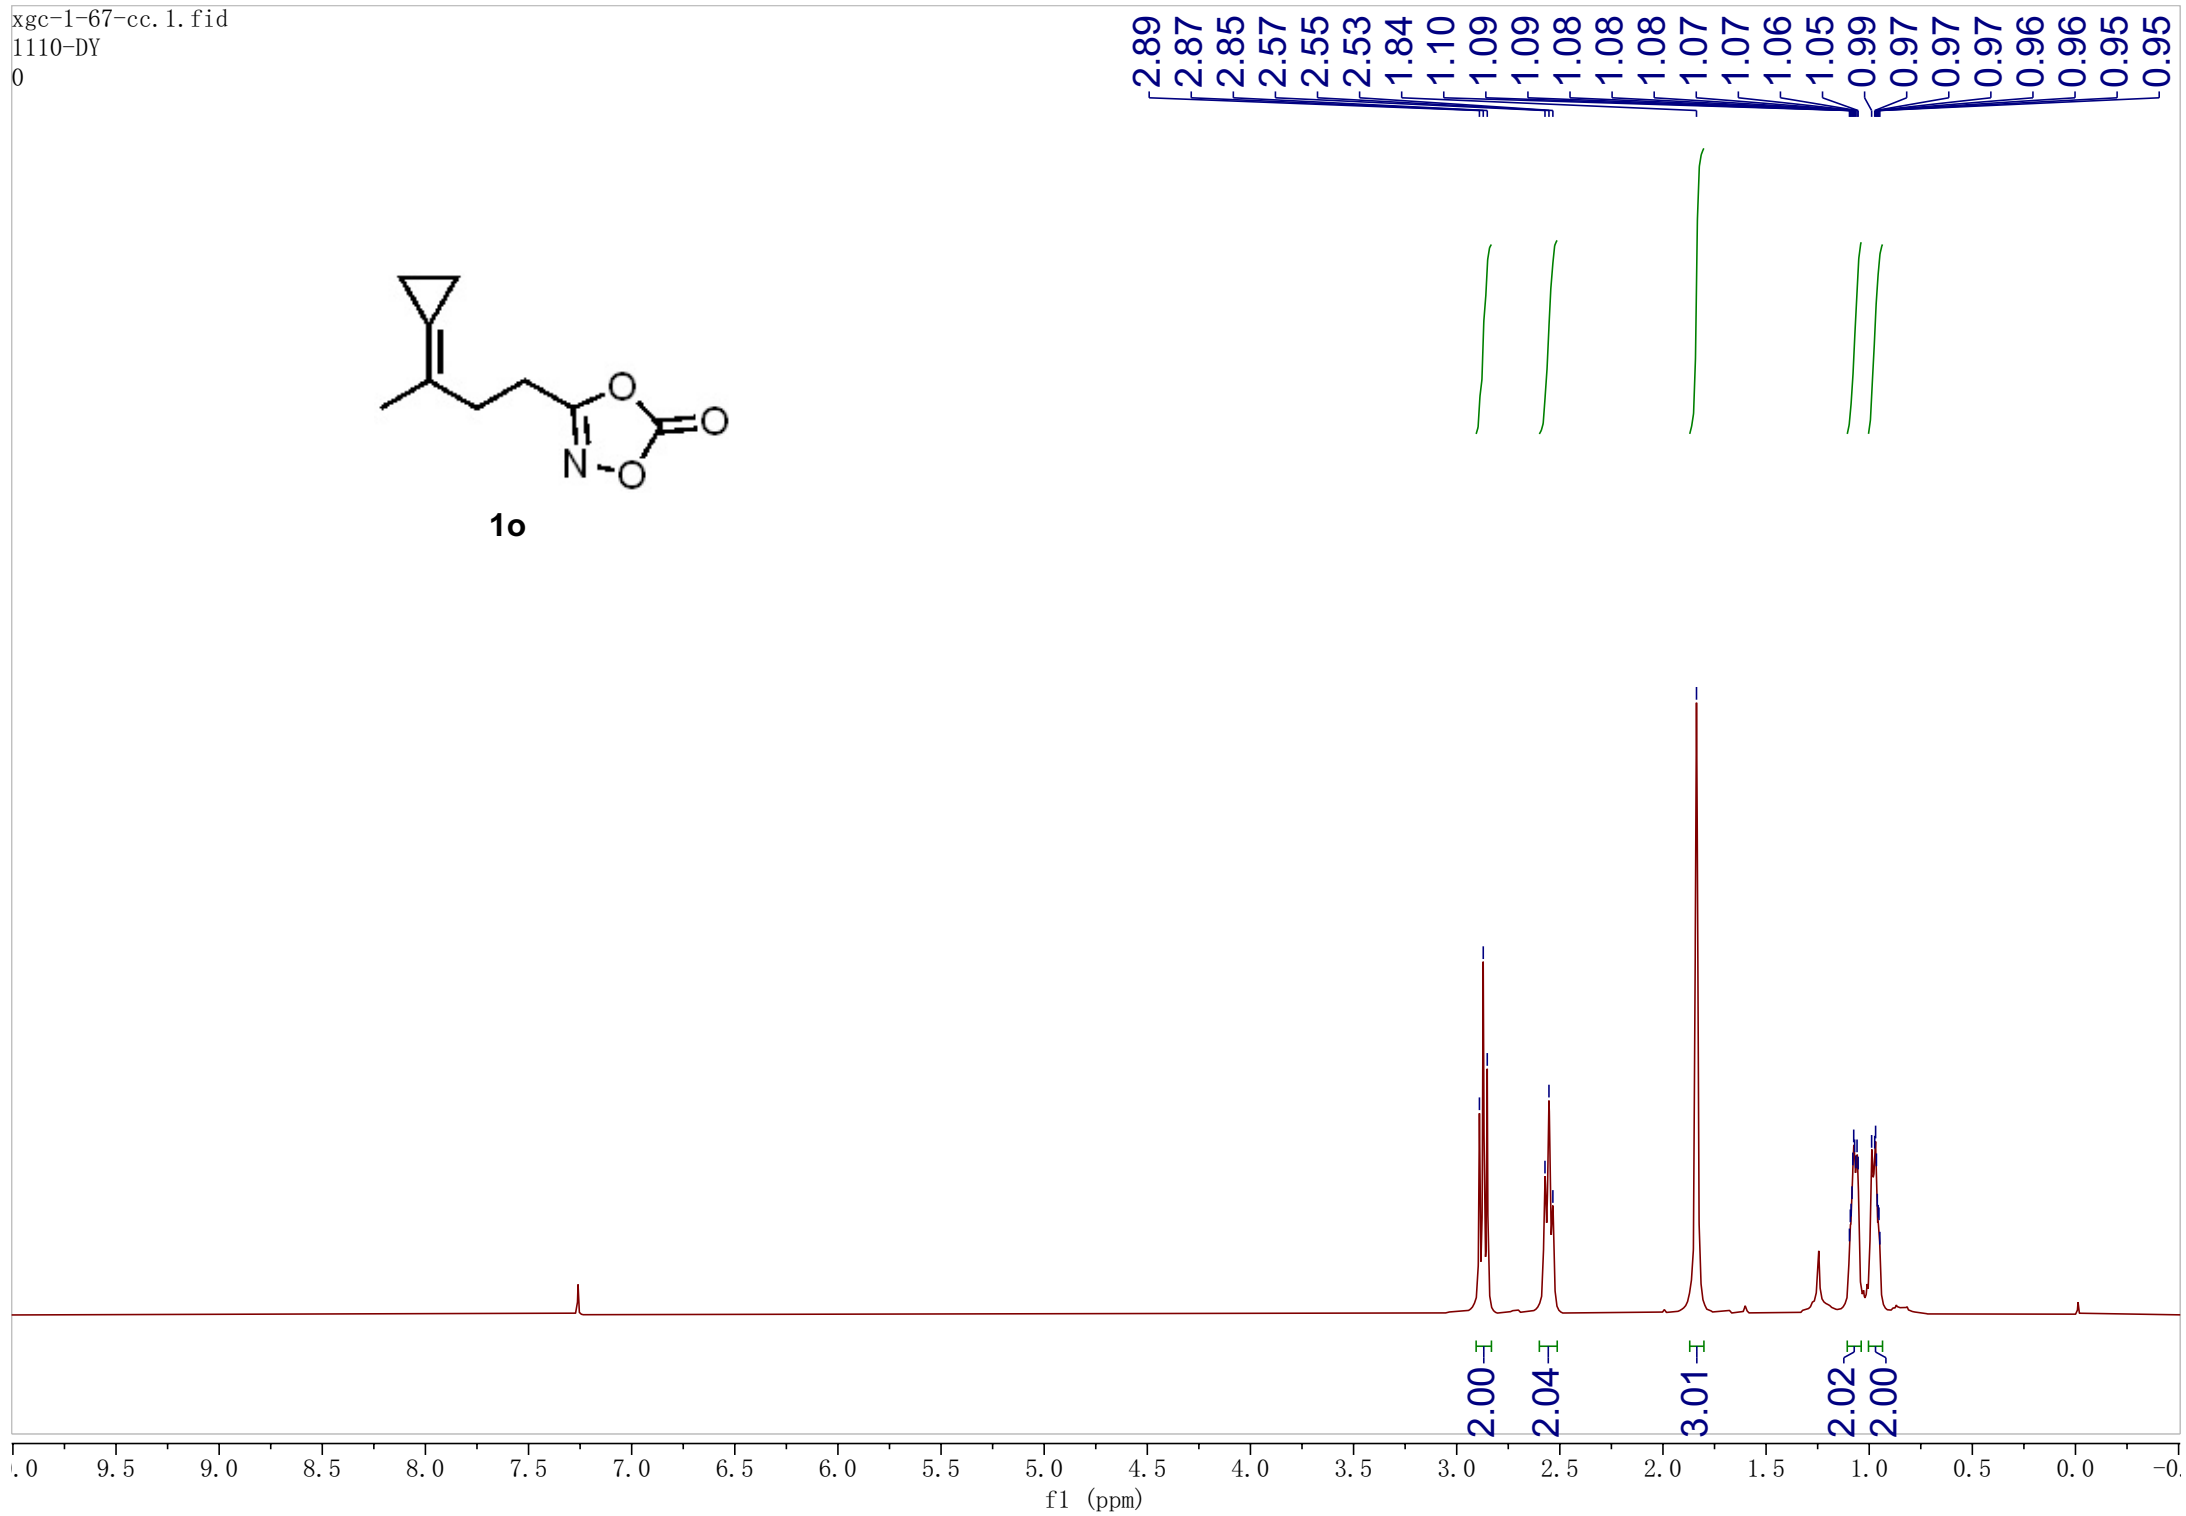

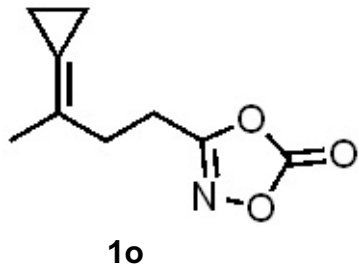

—166.79

—154.33

~120.64

~118.09

~31.32

~23.19

~20.74

~3.32

~1.42

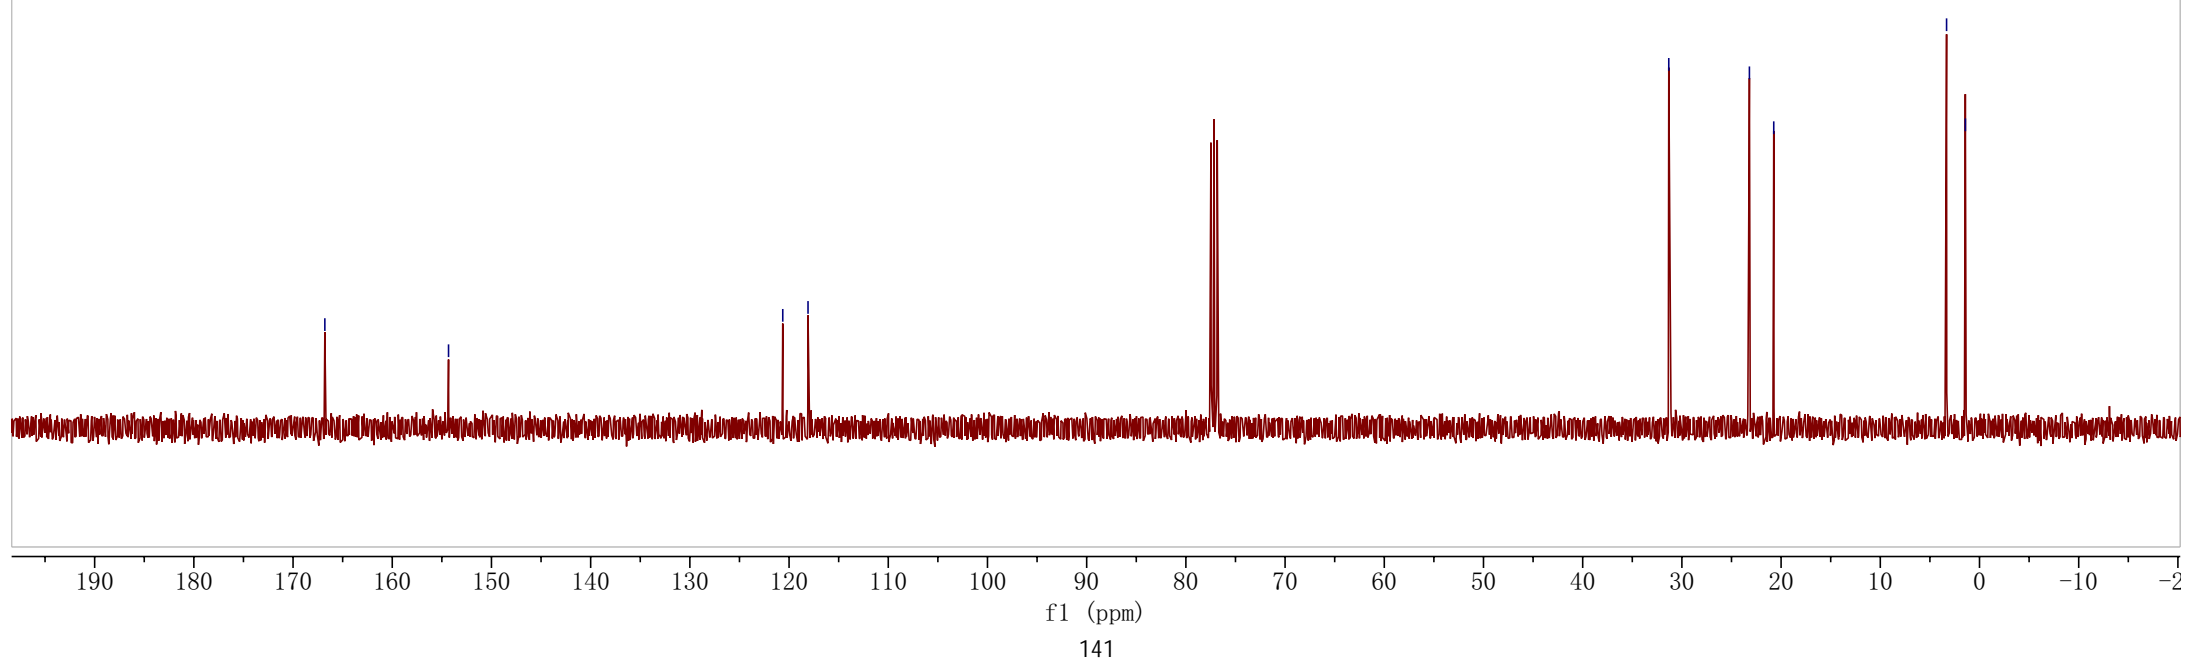

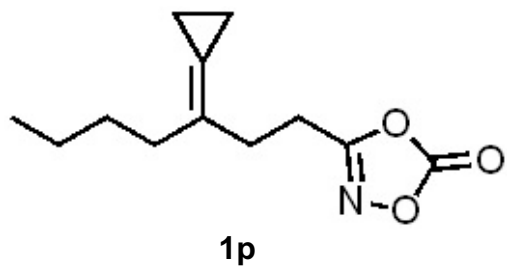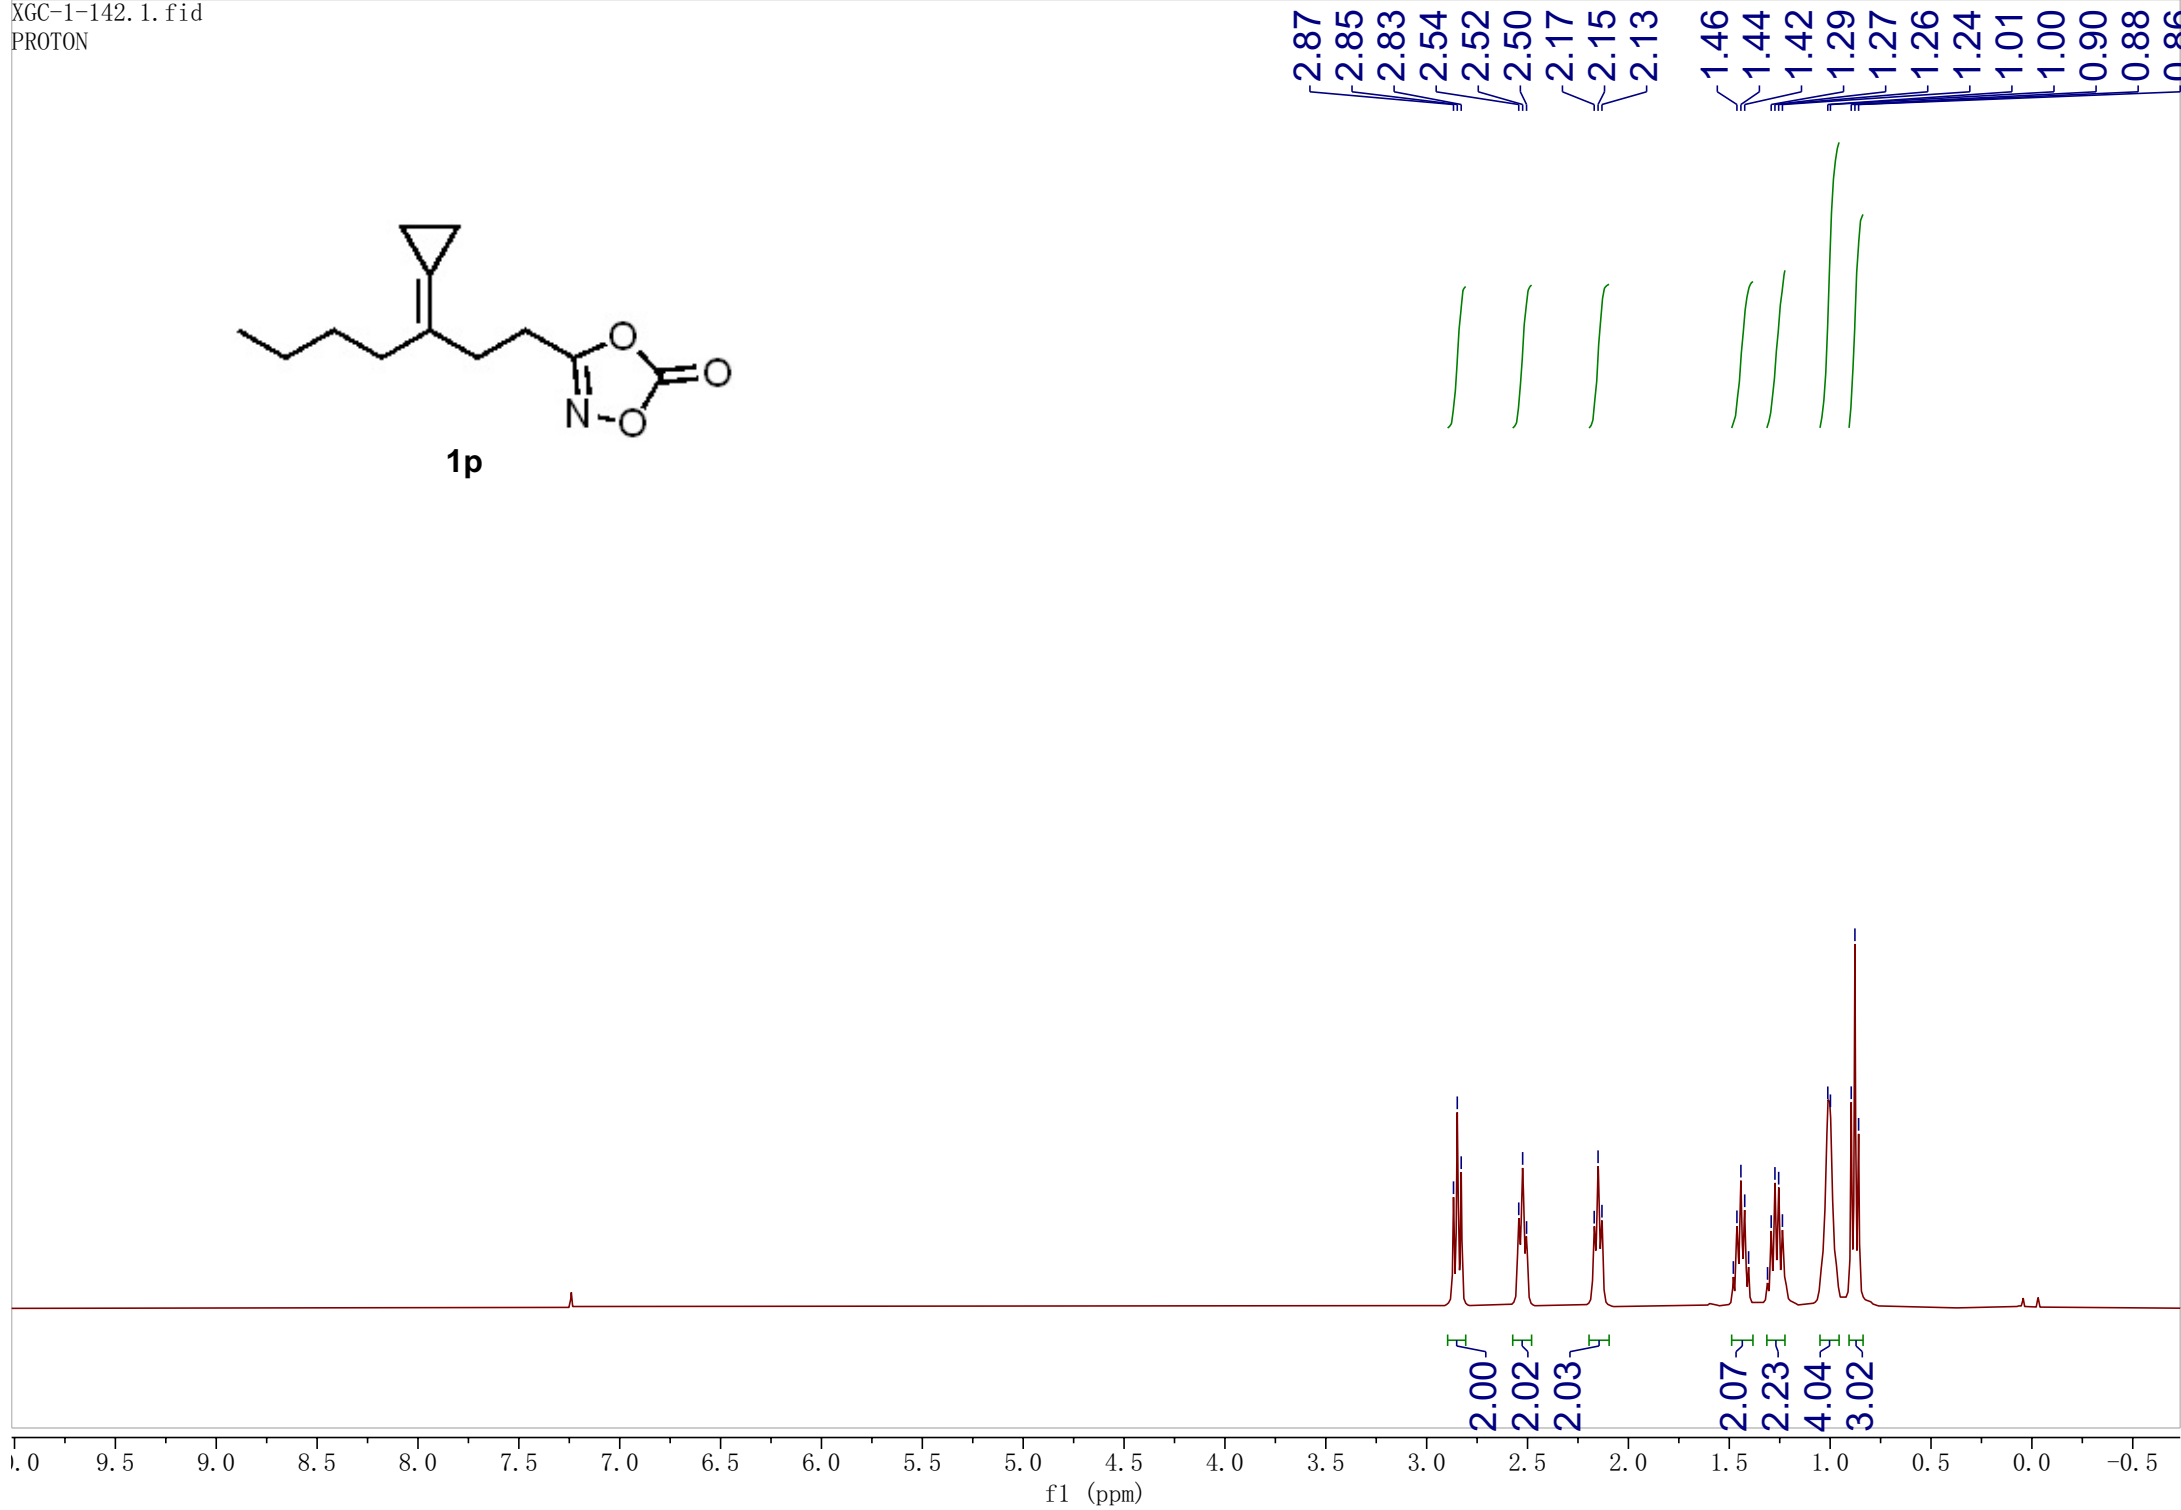

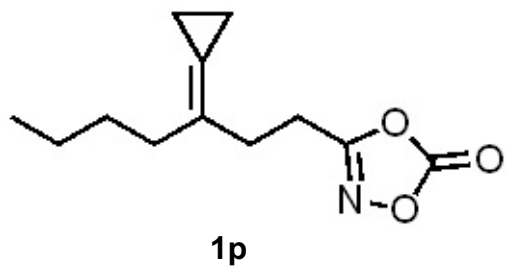

—166.88

—154.33

—124.75

—117.49

34.88

29.89

29.68

23.39

22.58

—14.03

2.46

1.74

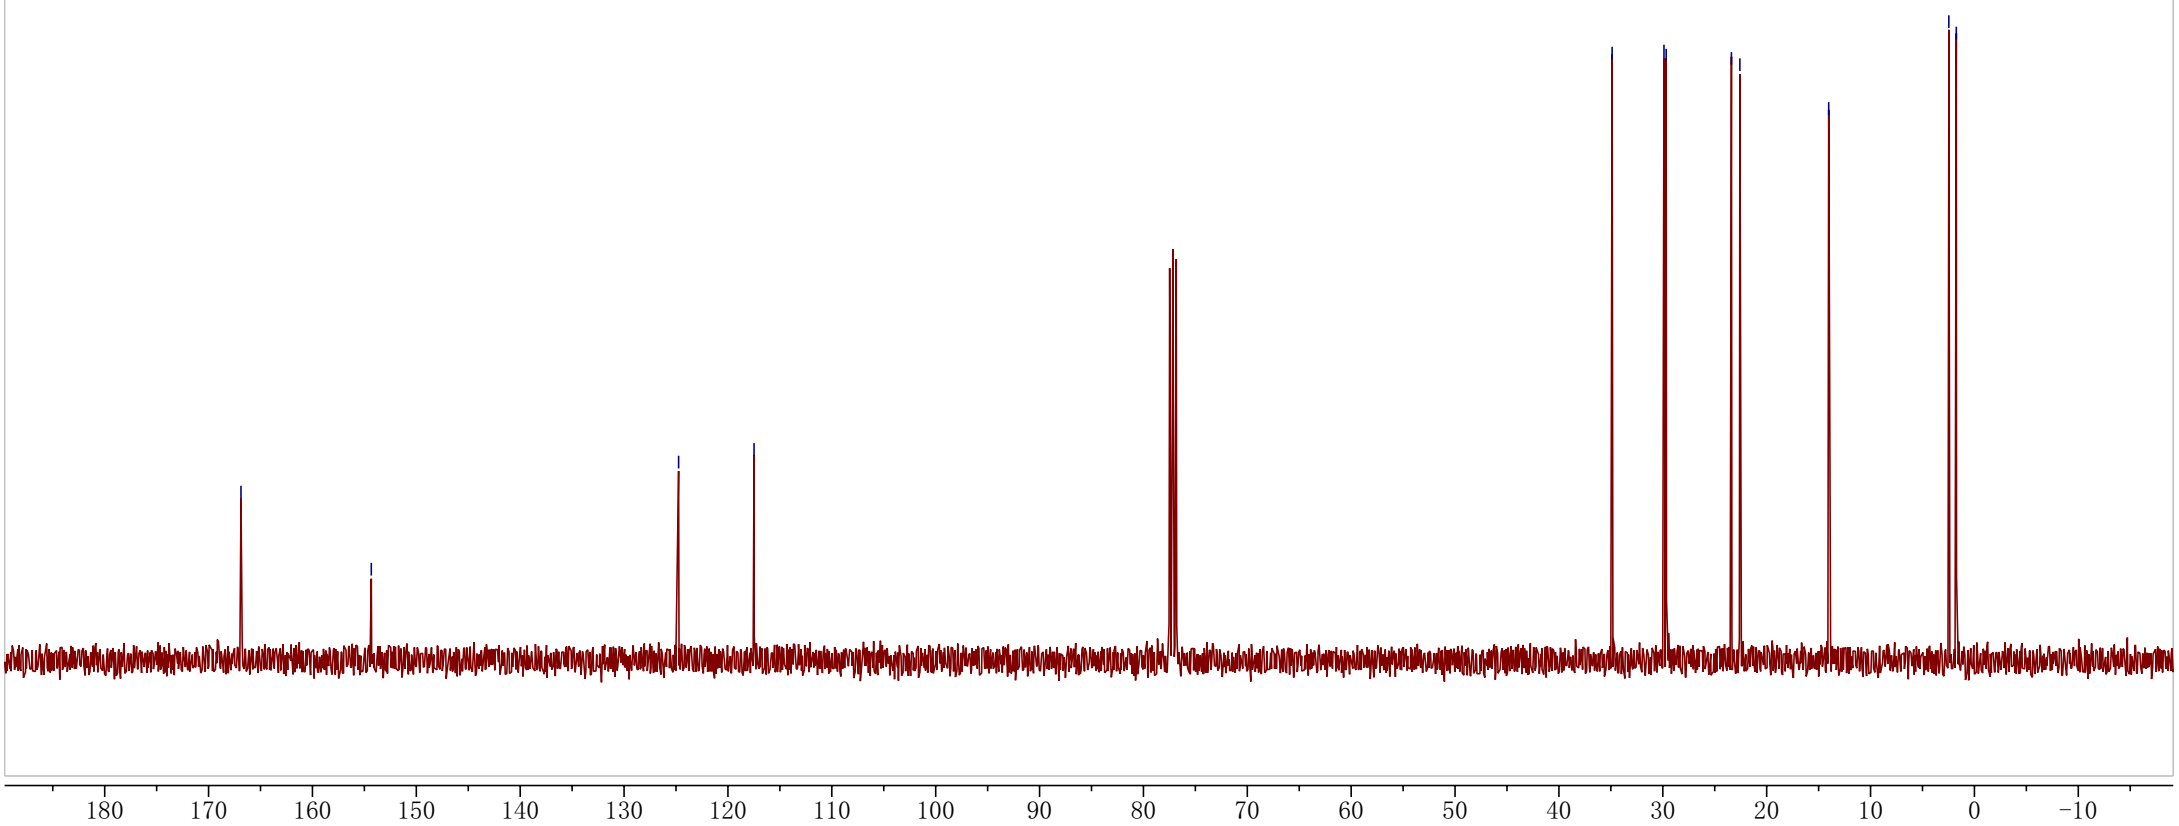

f1 (ppm)

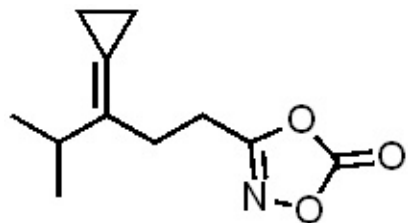

1q

2.90  
2.89  
2.88  
2.87  
2.87  
2.86  
2.85  
2.57  
2.56  
2.56  
2.55  
2.55  
2.54  
2.54  
2.53  
2.52  
2.52  
2.50  
2.48  
2.46  
2.44  
2.43  
1.23  
1.21  
1.21  
1.19  
1.19  
1.09  
1.08  
1.08  
1.00  
0.99  
0.99  
0.98  
0.98  
0.98  
0.97  
0.97  
0.96  
0.96  
0.95  
0.95

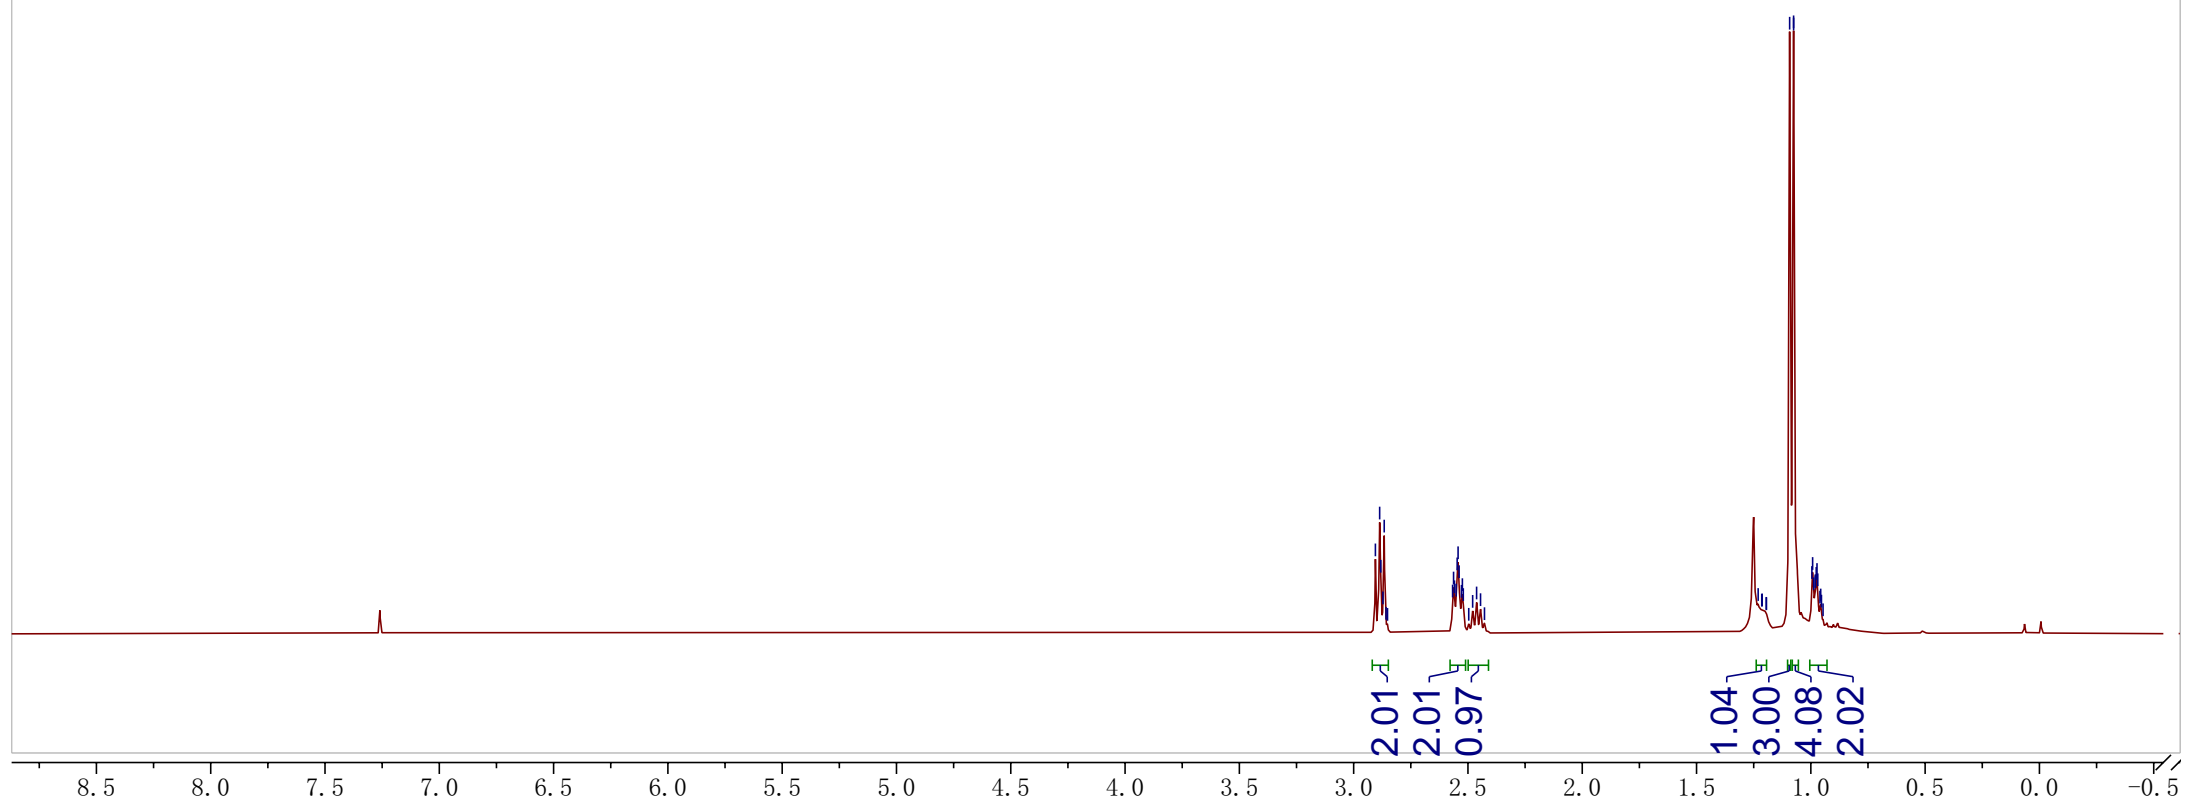

f1 (ppm)

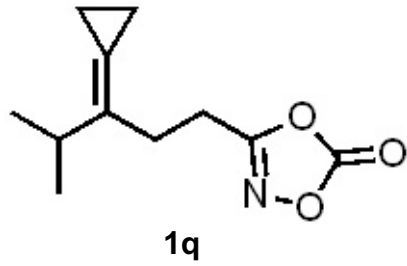

—166.94

—154.36

—130.13

—115.48

—34.11

—28.07

—23.69

—21.49

—2.13

—1.15

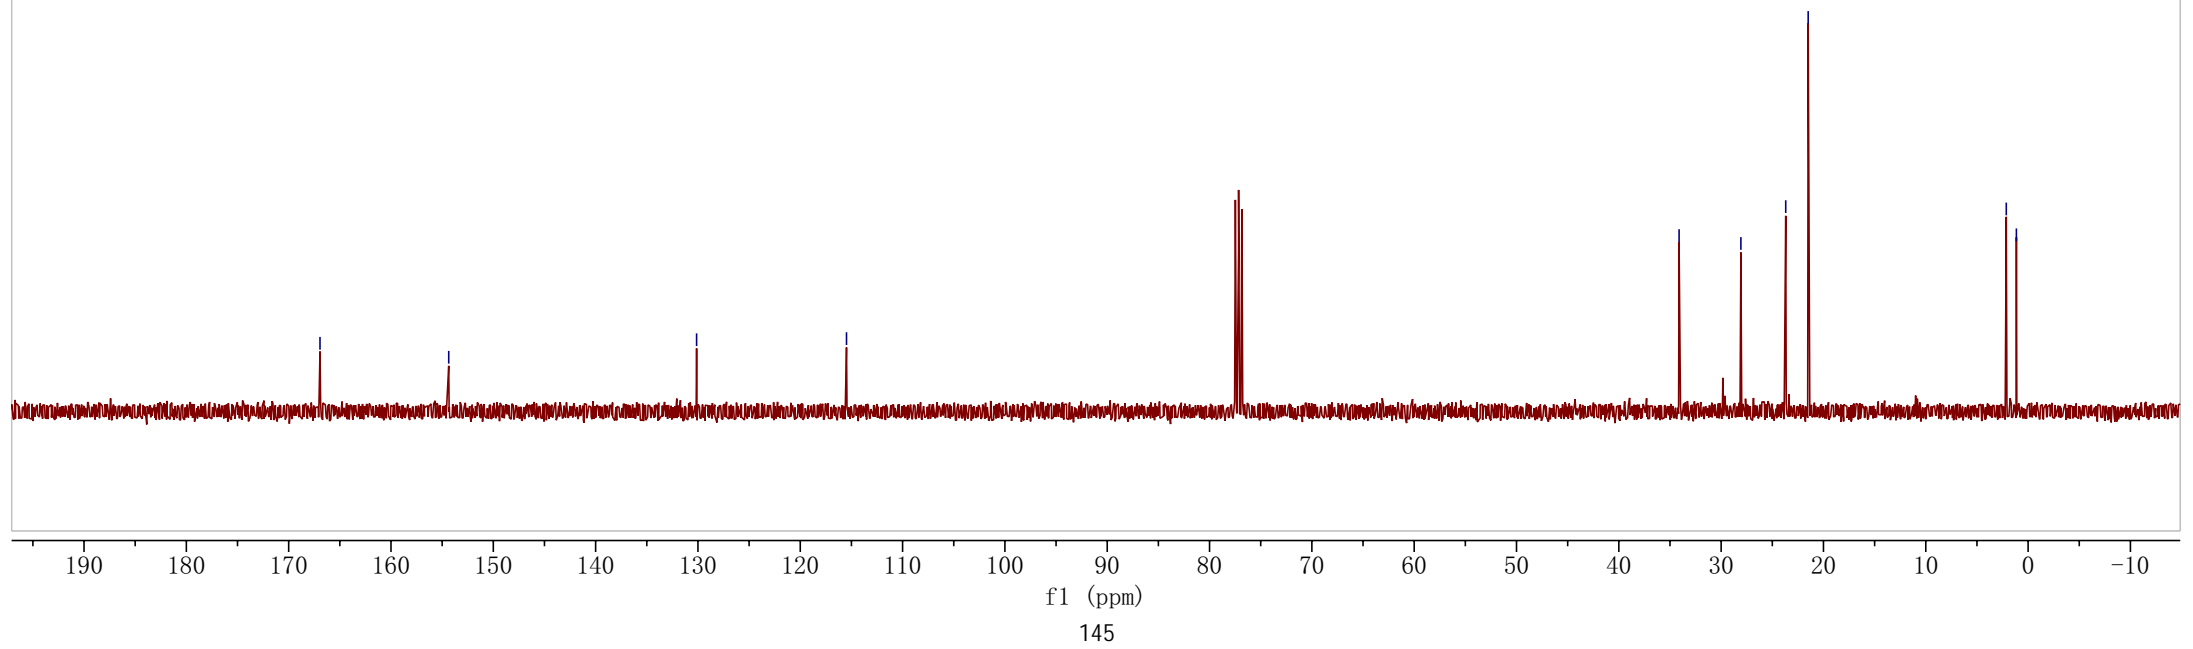

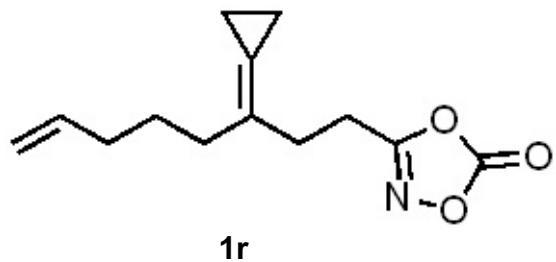

5.85 5.83 5.83 5.82 5.81 5.79 5.78 5.77 5.77 5.75 5.02 5.02 5.01 5.01 4.98 4.97 4.97 4.96 4.96 4.94 4.93 2.89 2.87 2.85 2.57 2.55 2.53 2.20 2.18 2.16 2.06 2.04 2.02 2.00 1.63 1.61 1.59 1.57 1.55 1.03

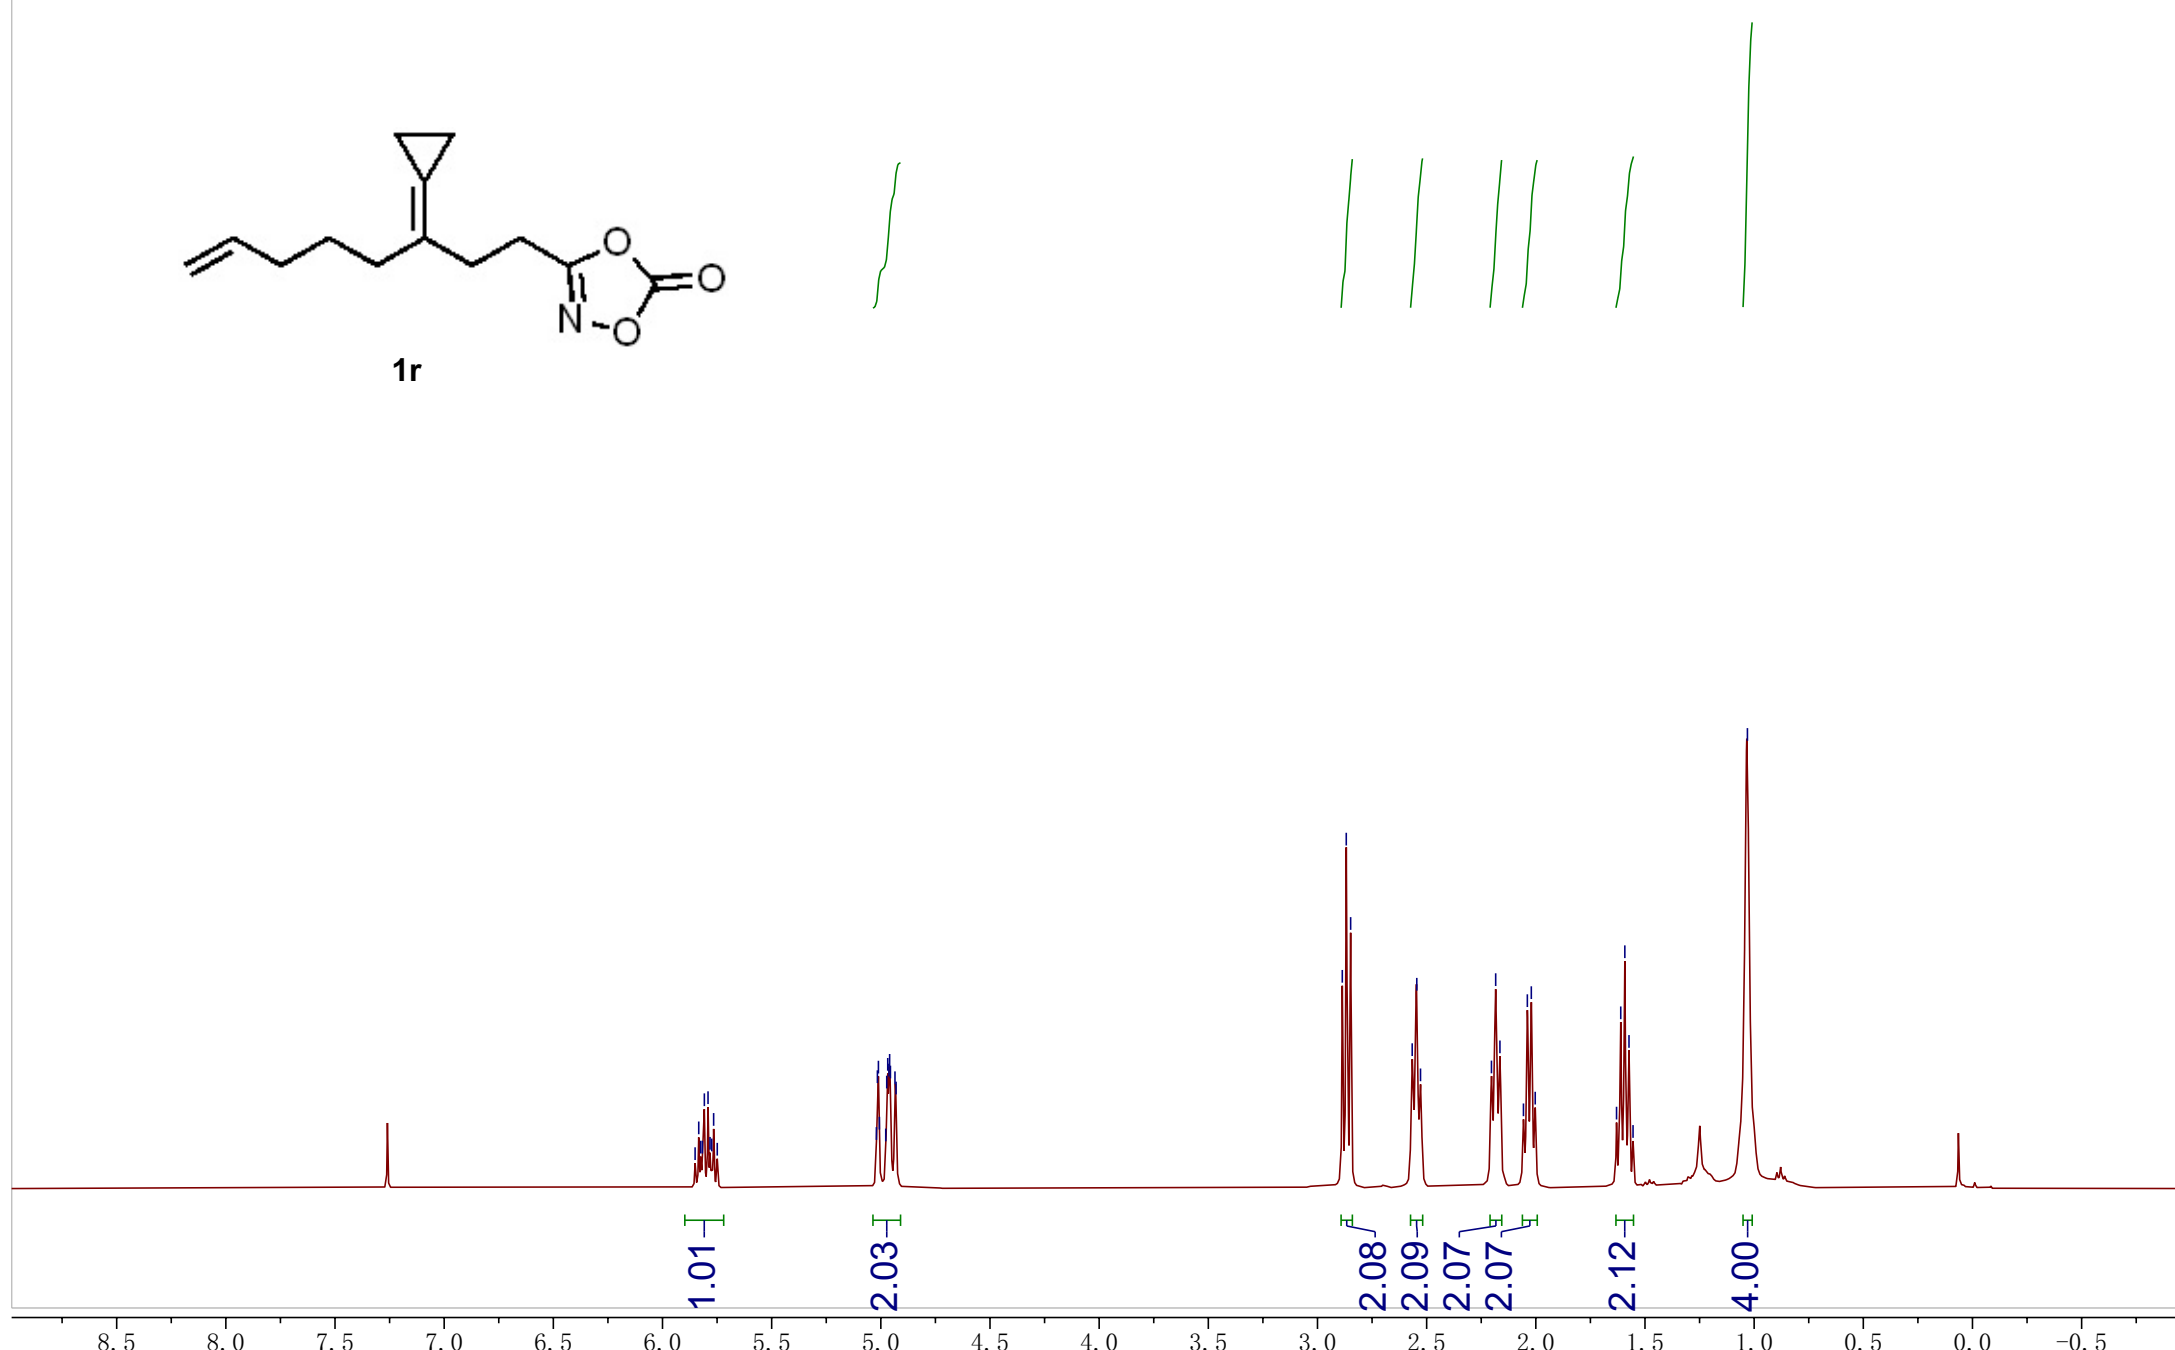

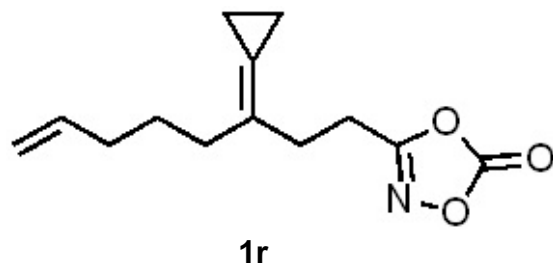

—166.81

—154.28

—138.64

~124.40

~117.79

~114.73

~34.57

~33.54

~29.70

~26.91

~23.35

~2.39

~1.81

~1.09

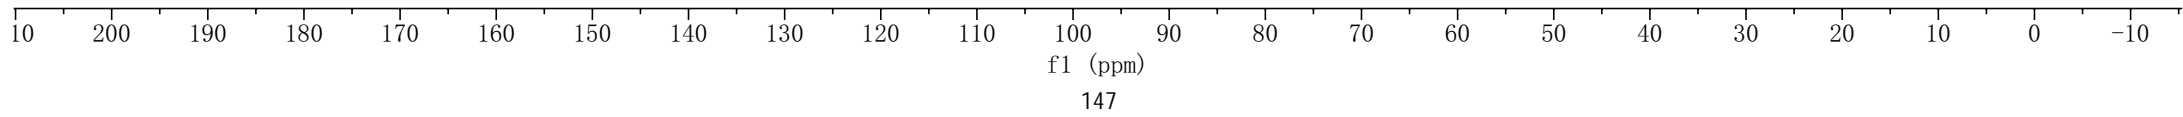

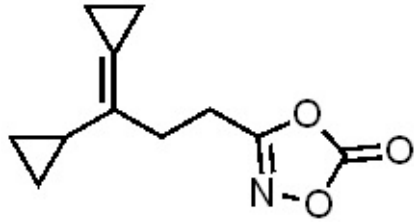

1s

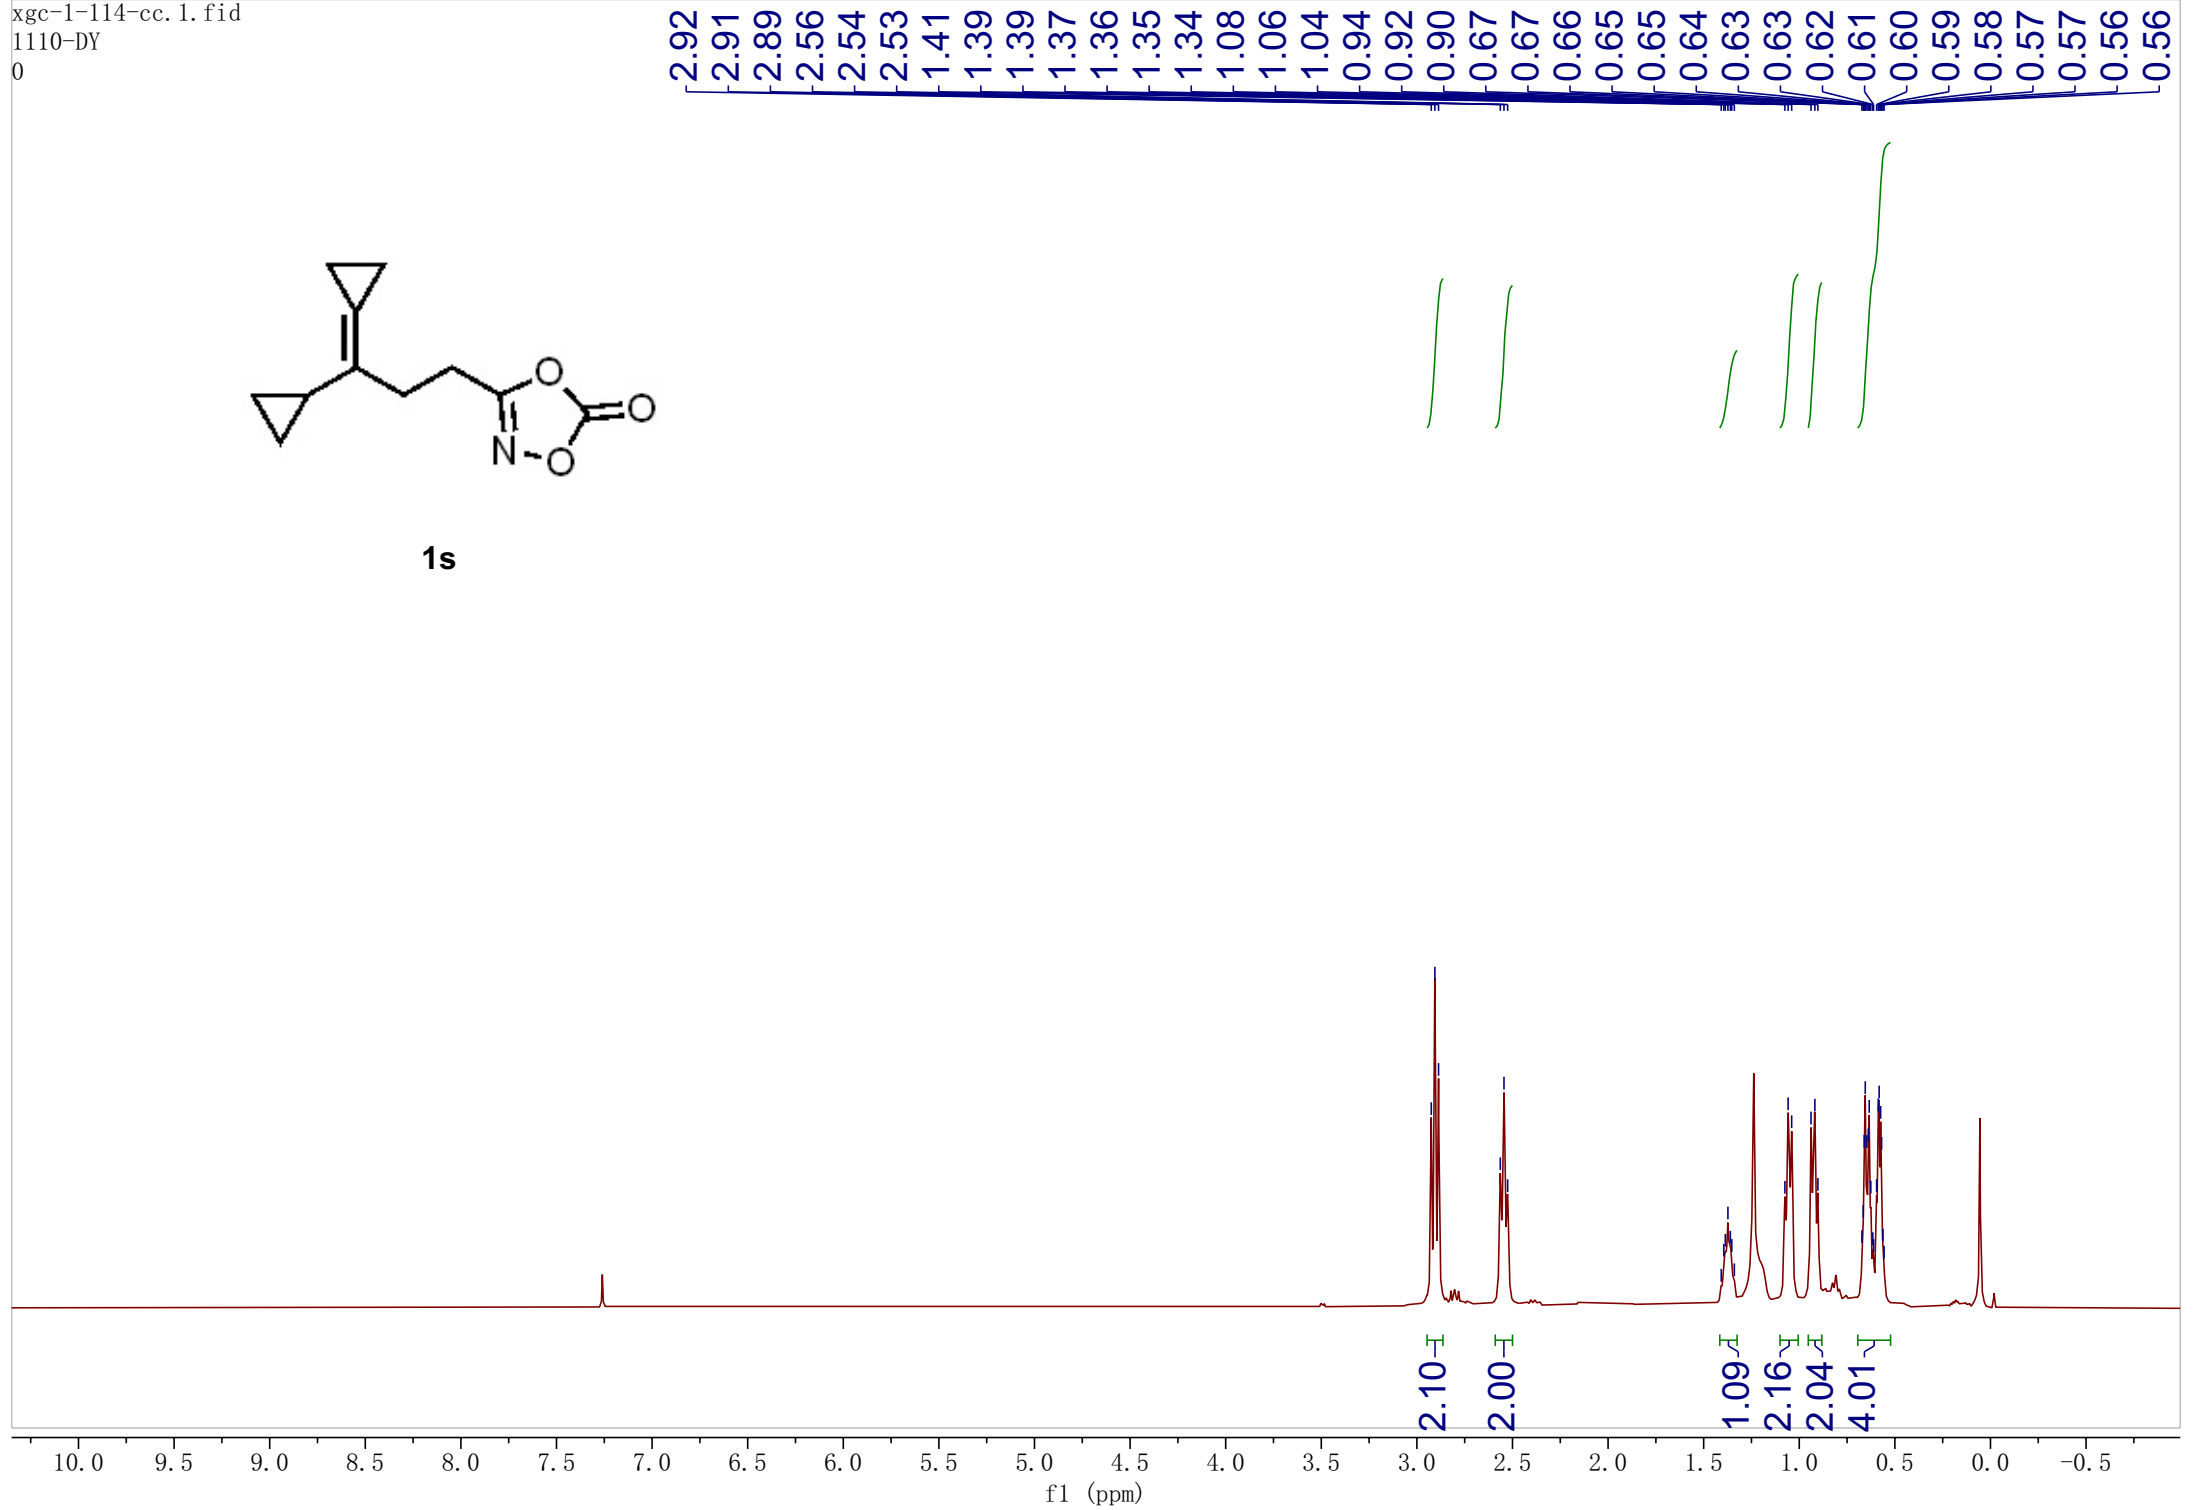

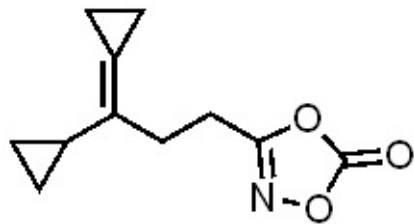

1s

—166.80 —154.33 —125.43 —115.93 —30.15 —23.74 —15.15 5.22 2.05 0.57

190 180 170 160 150 140 130 120 110 100 90 80 70 60 50 40 30 20 10 0 -10

f1 (ppm)

xgc-2-10.1  
1110-DY  
0

3.10  
3.08  
3.05  
3.03  
3.01  
3.01  
2.86  
2.84  
2.82  
2.51  
2.49  
2.48  
2.12  
2.11  
2.09  
2.08  
2.07  
2.06  
2.05  
2.03  
2.02  
1.94  
1.92  
1.90  
1.87  
1.85  
1.83  
1.78  
1.77  
1.76  
1.75  
1.74  
1.73  
1.72  
1.71  
1.71  
1.69

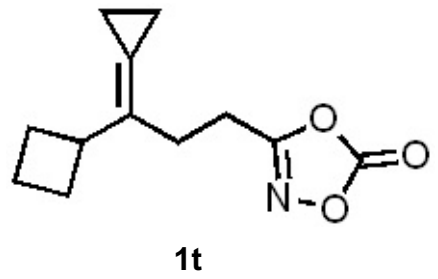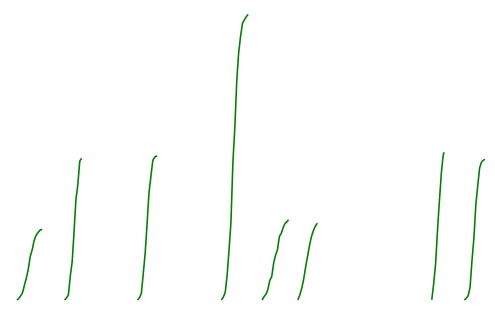

1.14  
1.14  
1.13  
1.13  
1.12  
1.11  
1.10  
0.96  
0.96  
0.95  
0.94

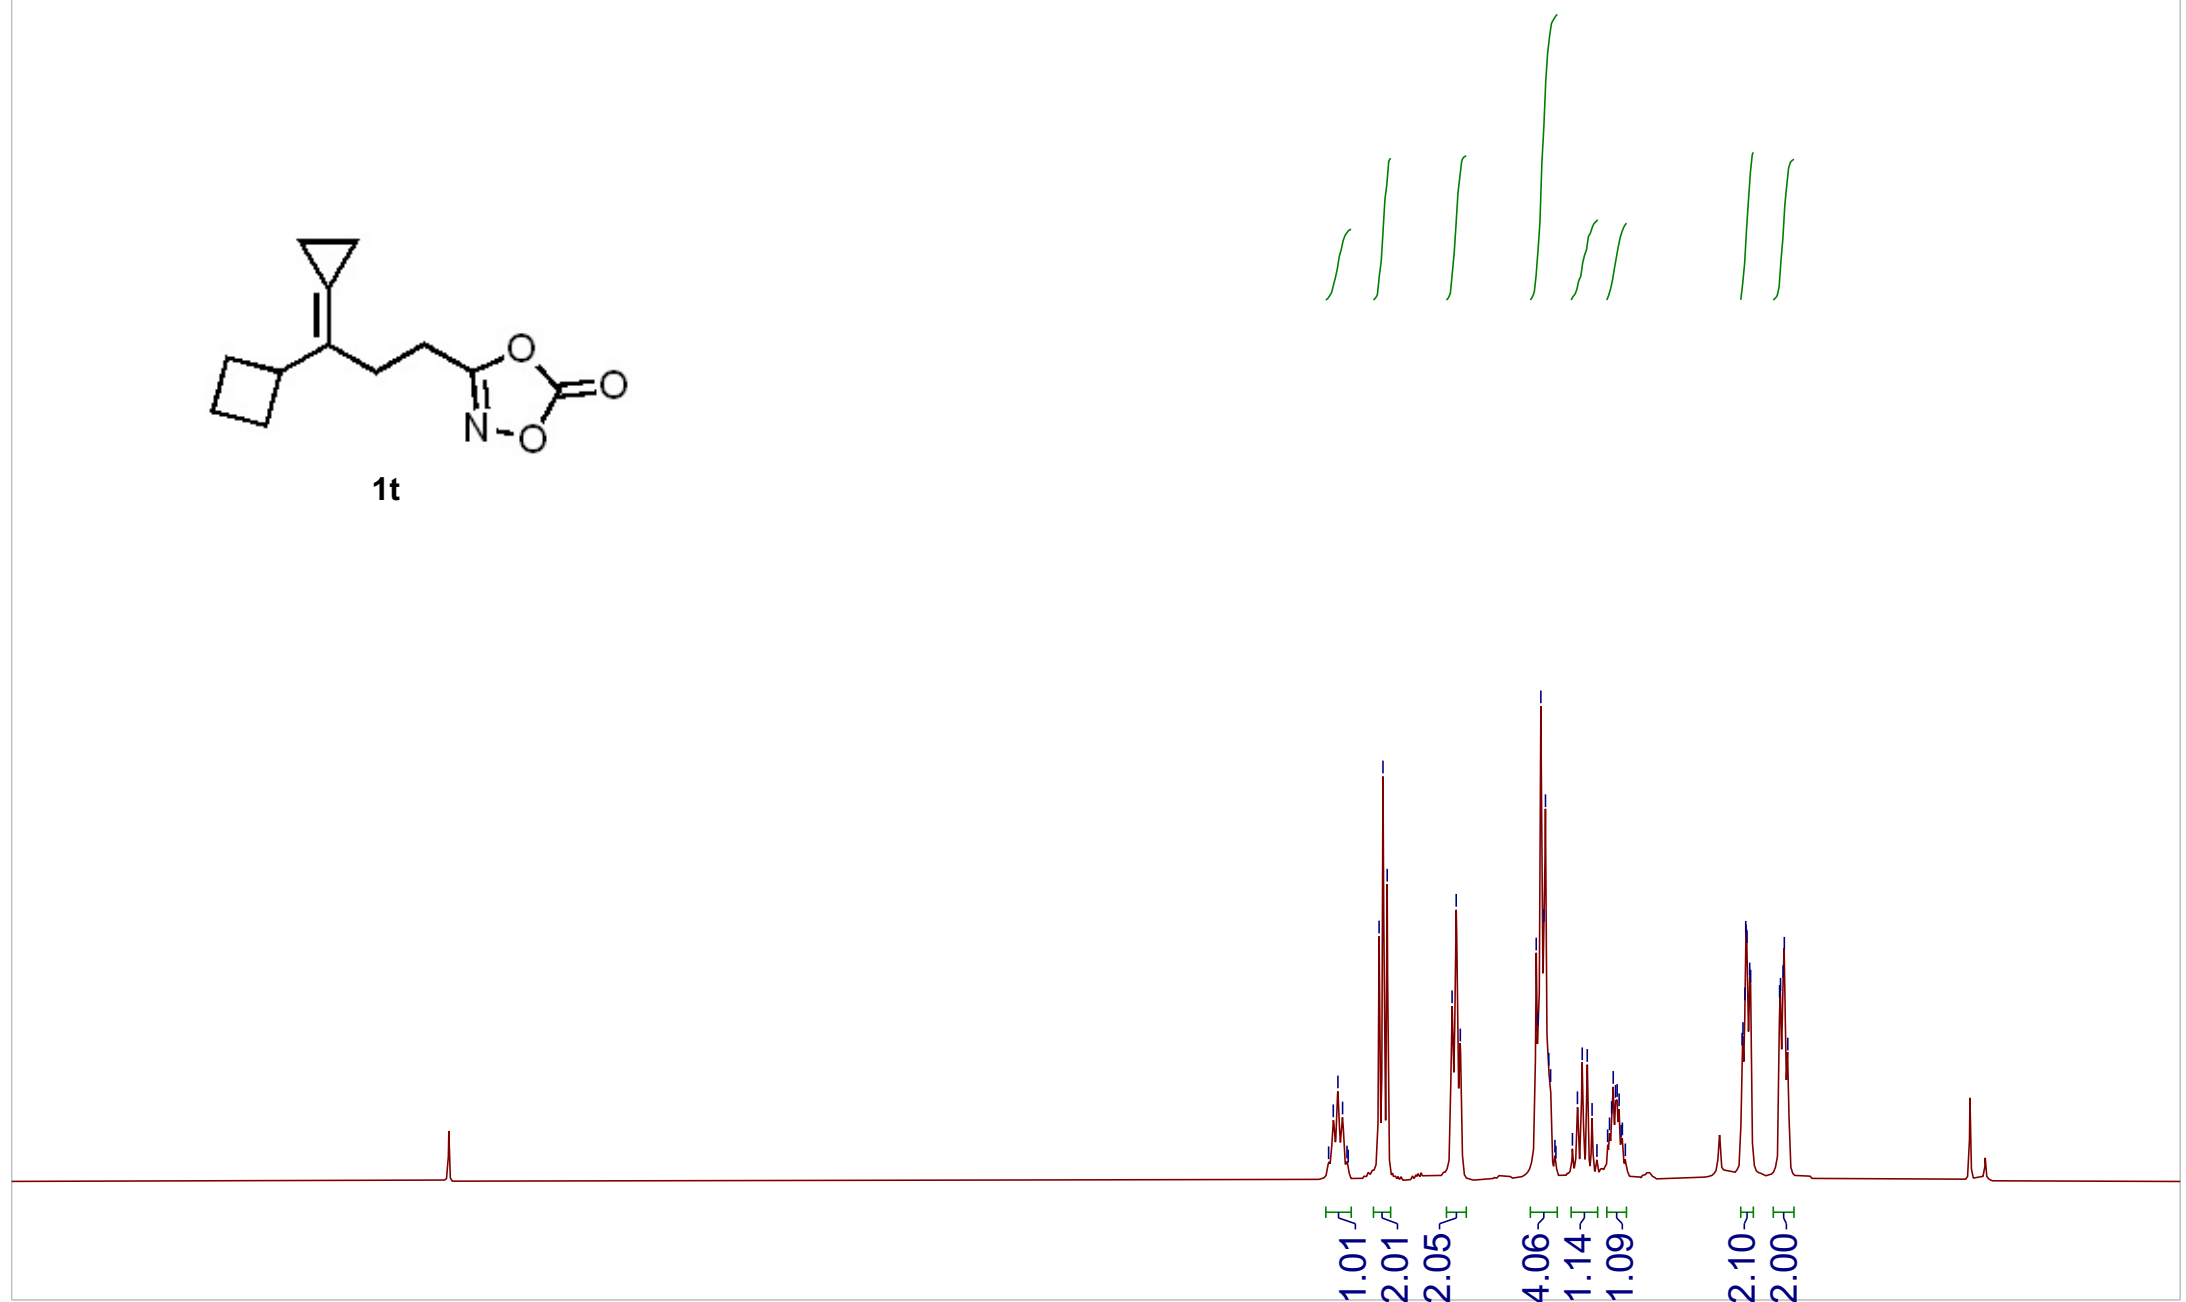

1.01  
2.01  
2.05  
4.06  
1.14  
1.09  
2.10  
2.00

9.0 8.5 8.0 7.5 7.0 6.5 6.0 5.5 5.0 4.5 4.0 3.5 3.0 2.5 2.0 1.5 1.0 0.5 0.0 -0.5

f1 (ppm)

150

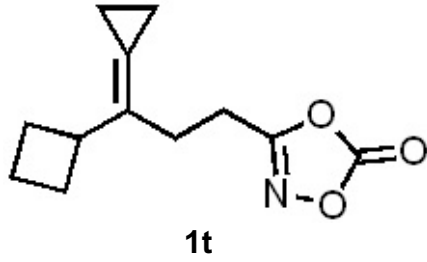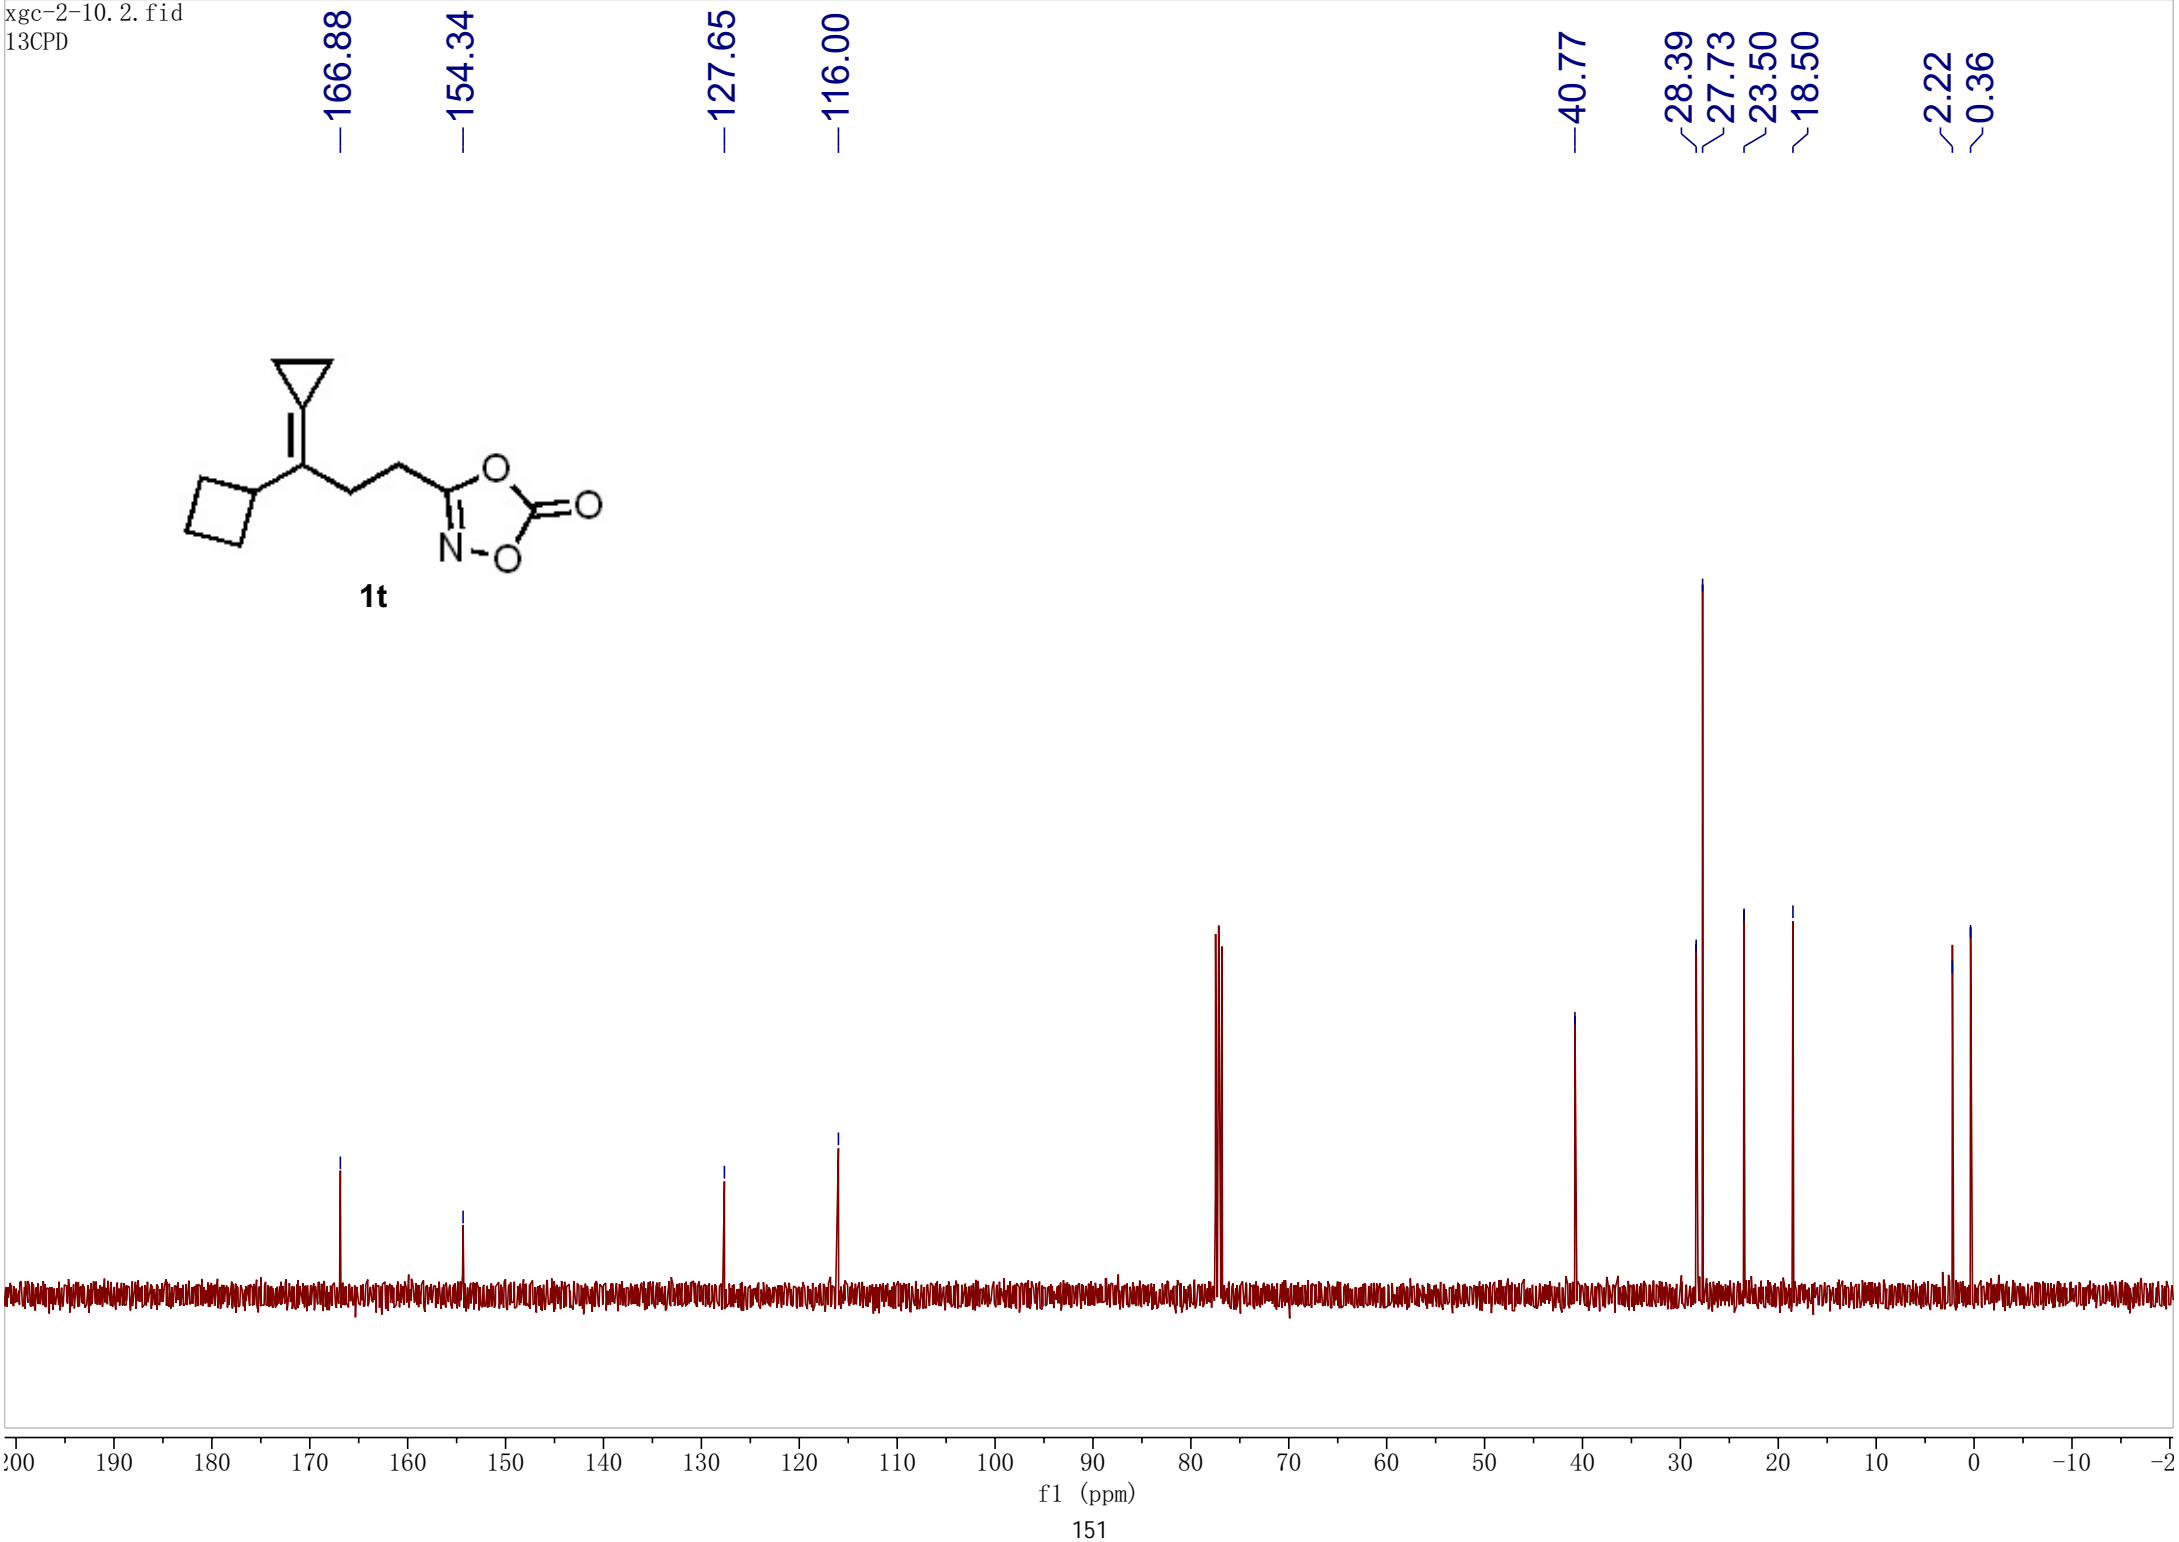

xgc\_2-1\_f1.d  
PR000

2.90 2.89 2.87 2.57 2.55 2.53 1.84 1.83 1.82 1.82 1.81 1.80 1.80 1.79 1.78 1.69 1.68 1.68 1.67 1.66 1.65 1.64 1.63 1.62 1.61 1.61 1.60 1.59 1.58 1.57 1.57 1.56 1.55 1.54 1.53 1.52 1.52 1.51 1.50 1.50 1.49 1.48 1.47 1.10 1.08 1.06 0.99 0.98 0.97 0.97 0.96

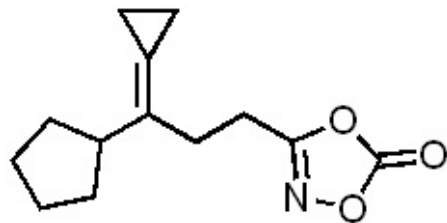

1u

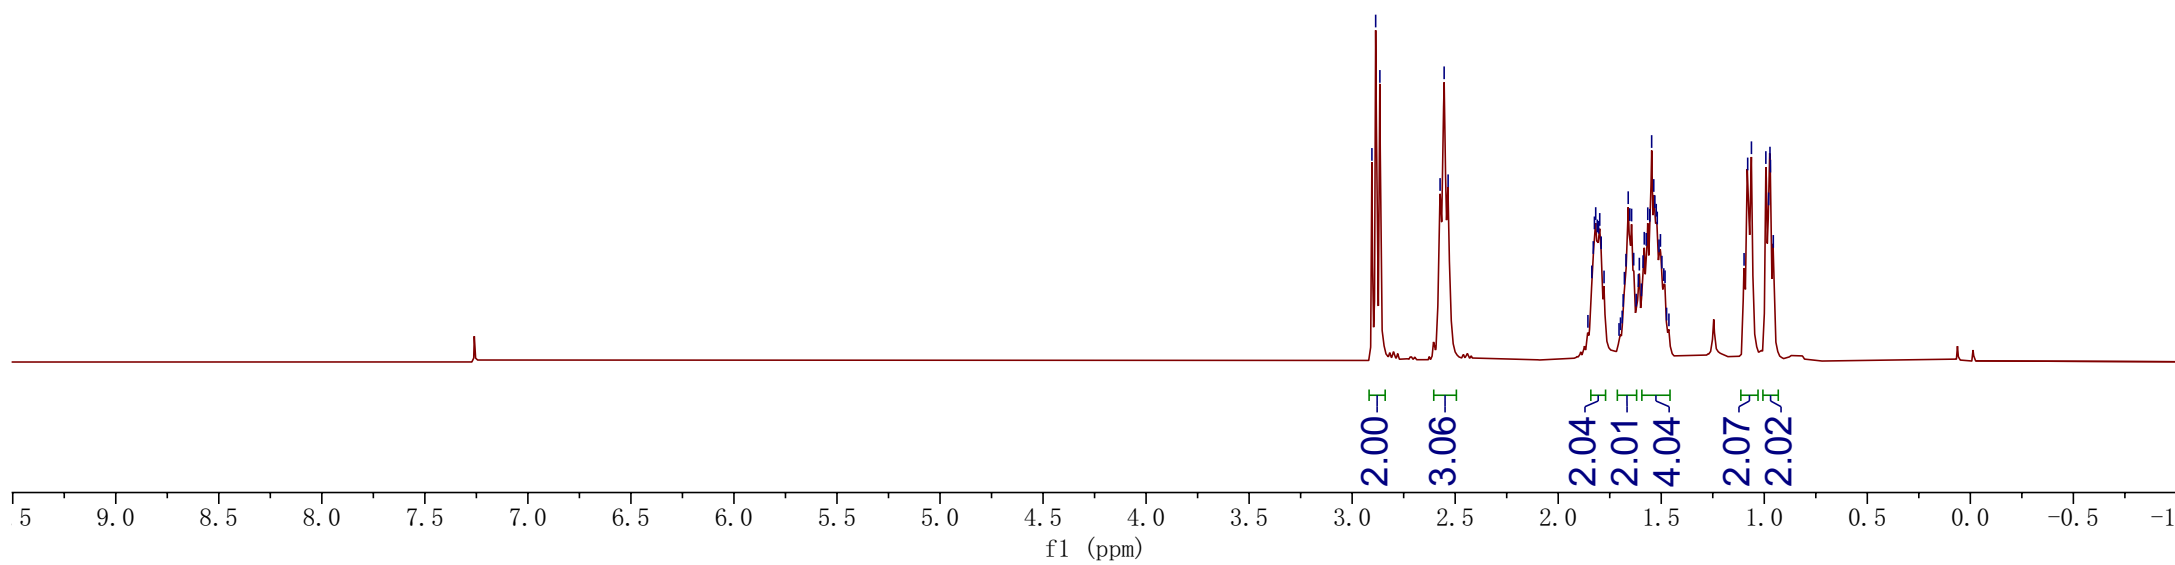

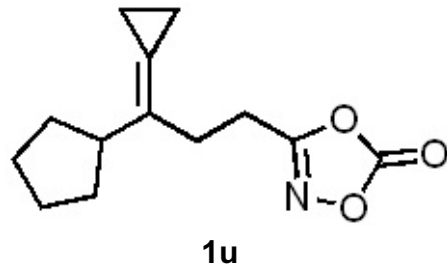

—166.92

—154.32

—127.81

—115.81

—45.78

31.26

29.28

25.13

23.70

2.50

1.25

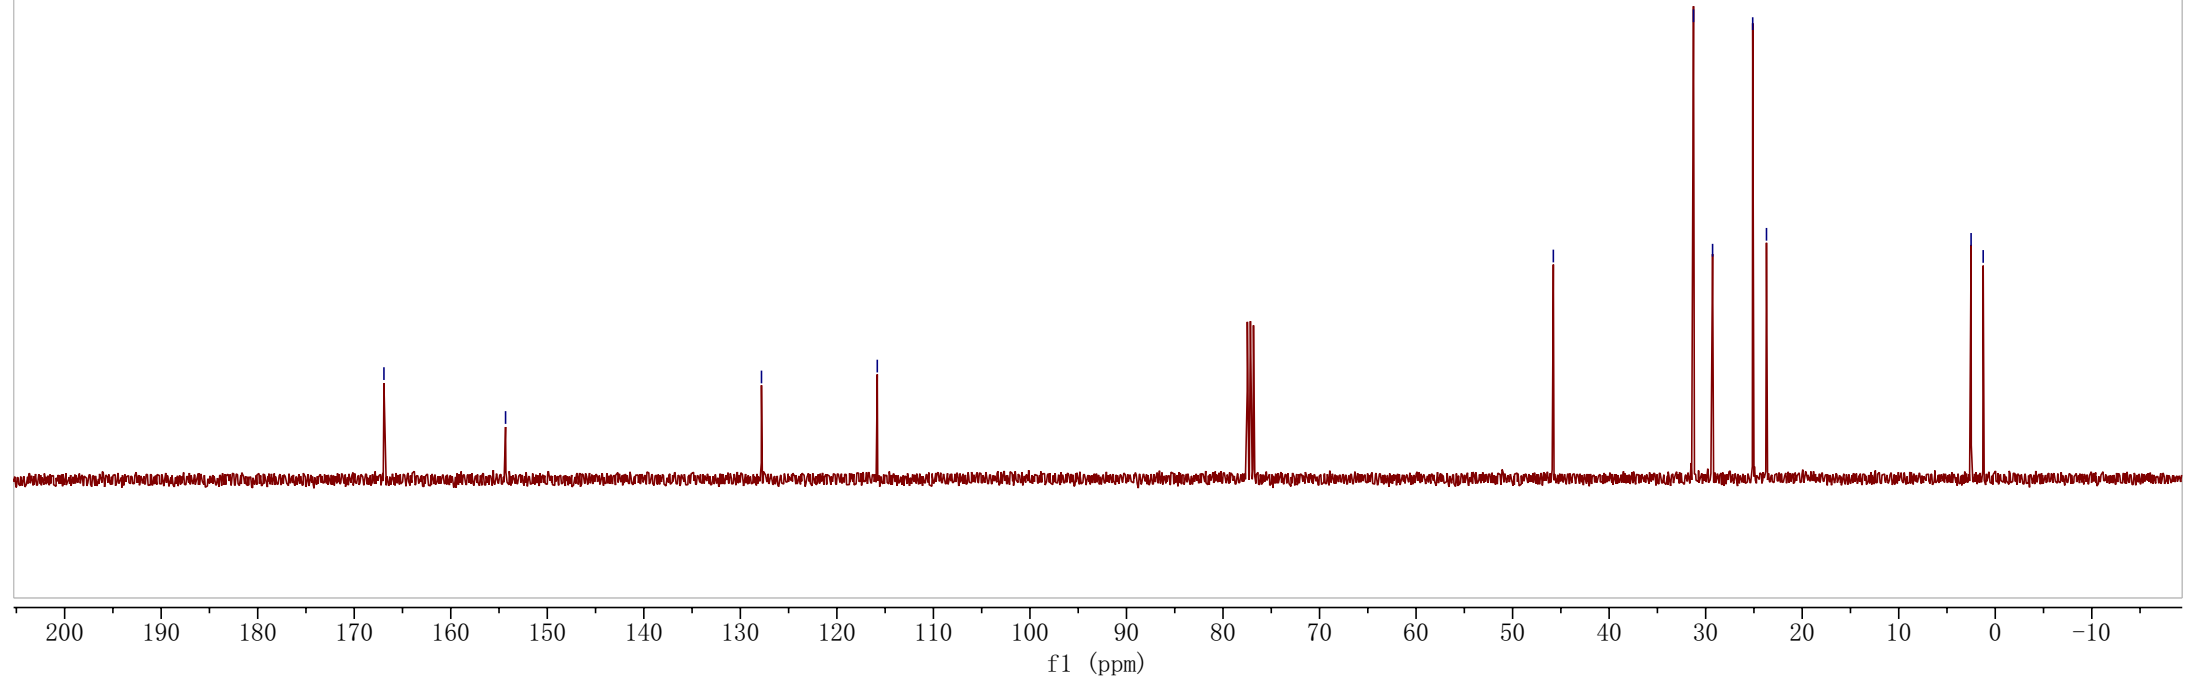

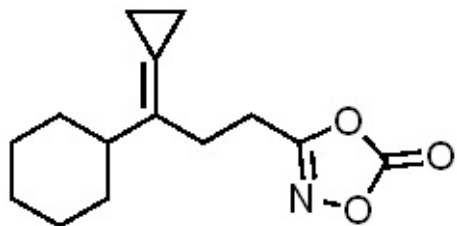

1v

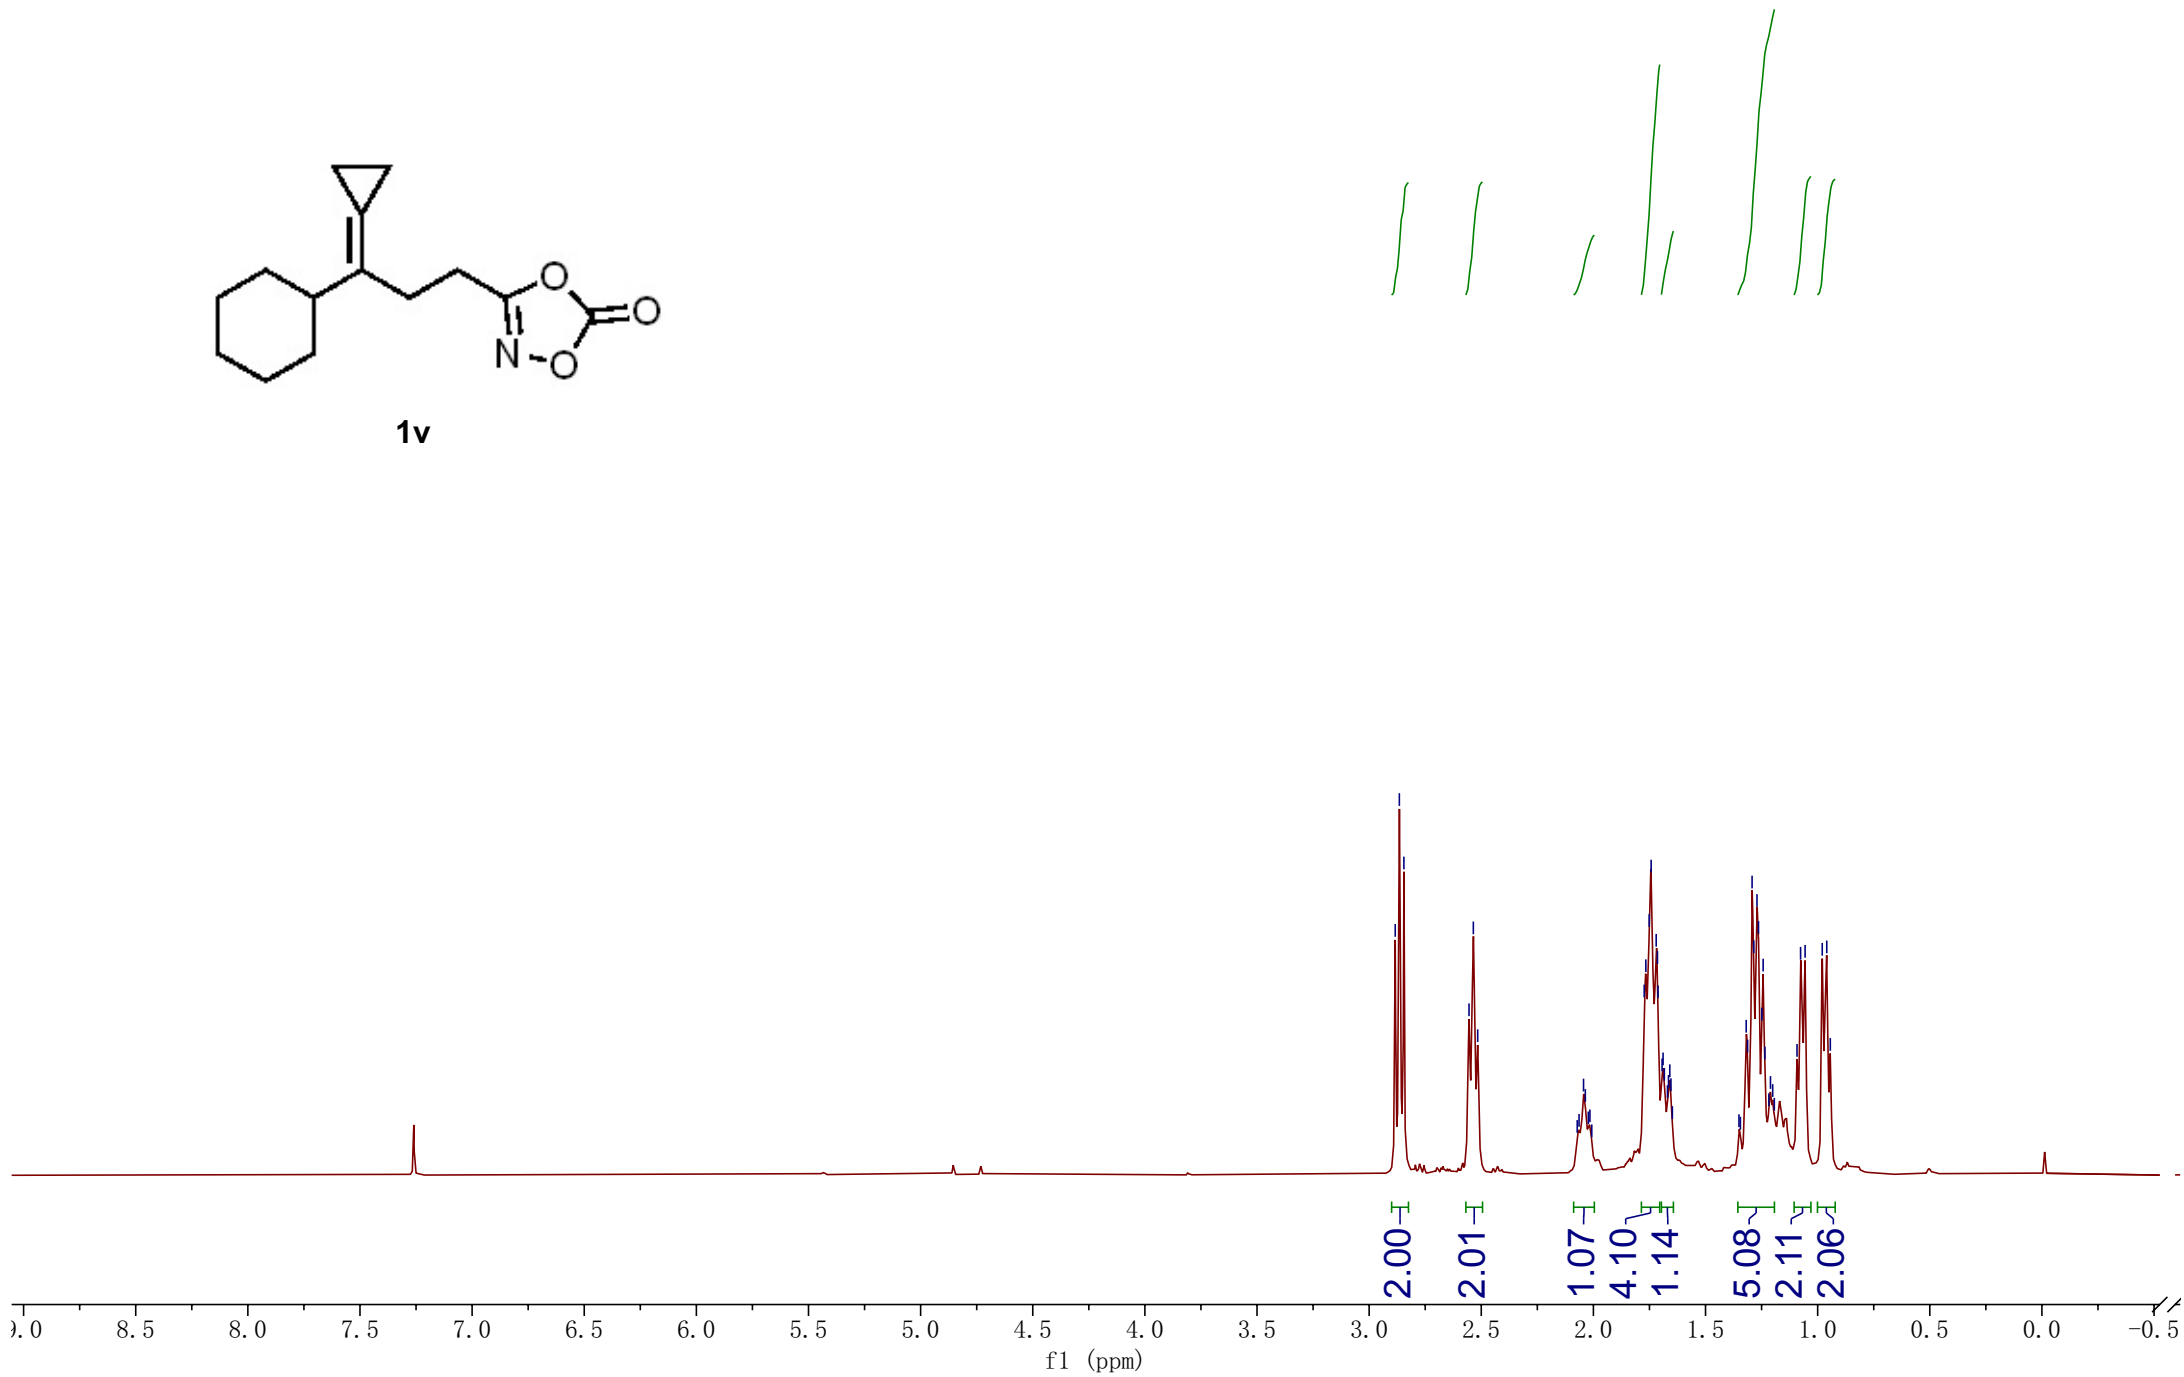

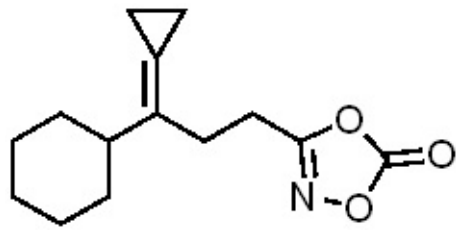

1v

—166.93

—154.35

—129.54

—115.96

—44.39

31.89

28.71

26.79

26.37

23.79

2.39

1.14

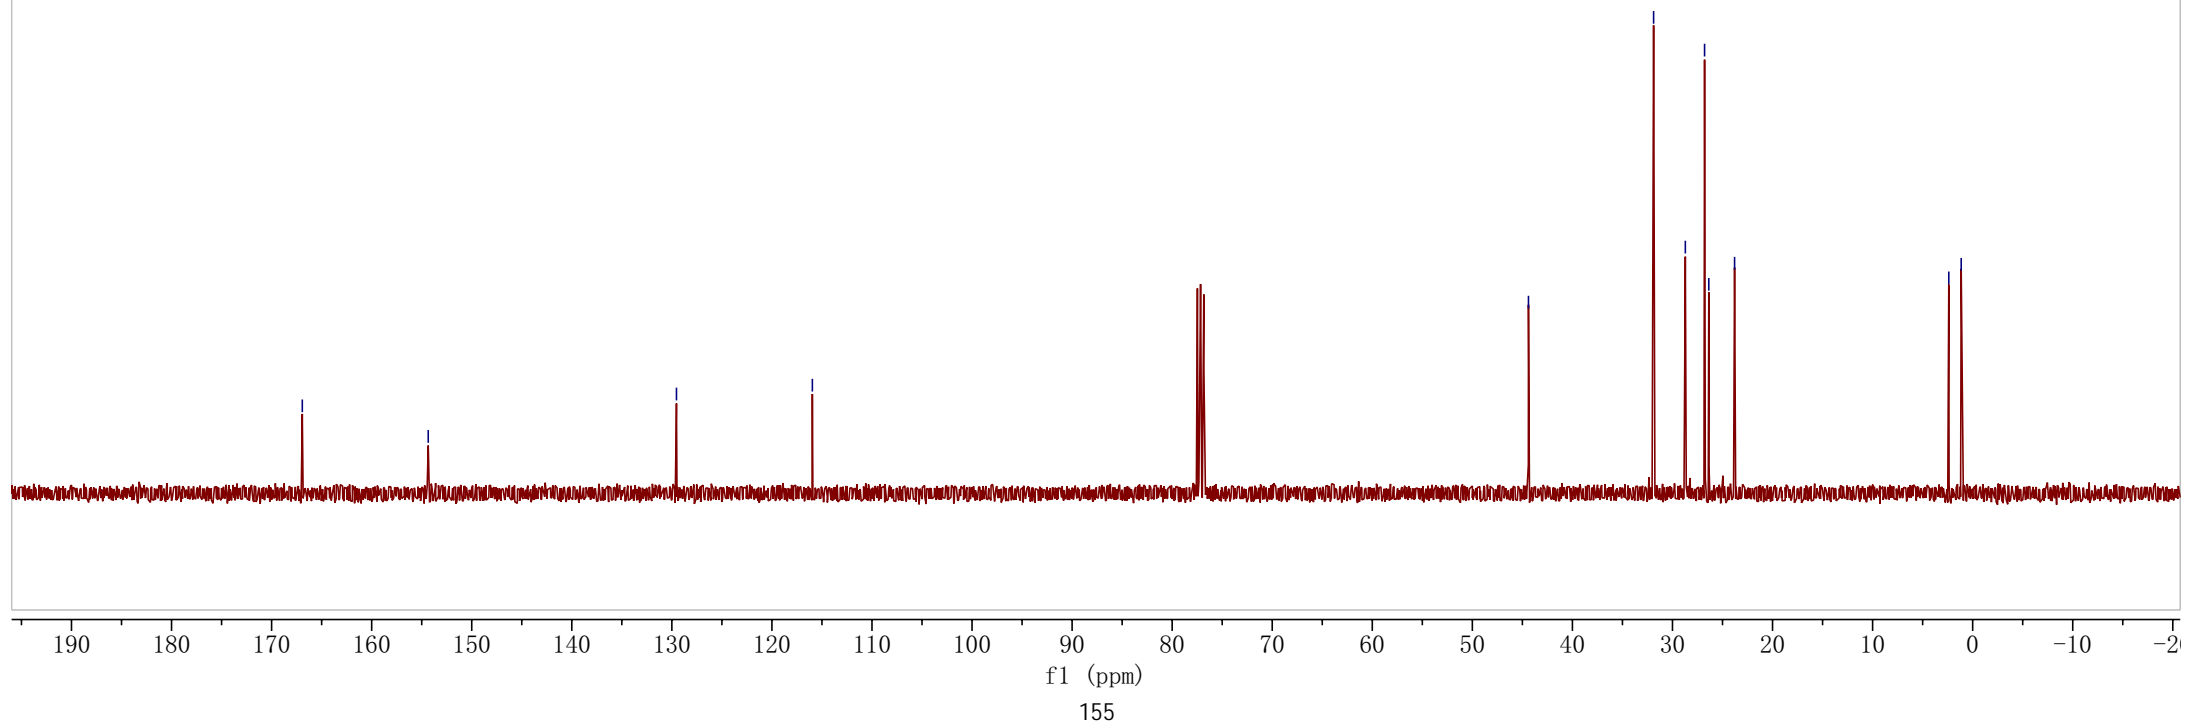

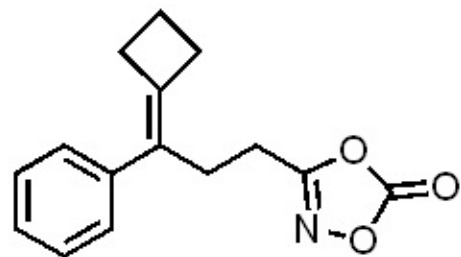

1w

7.25  
7.23  
7.23  
7.21  
7.14  
7.13  
7.11  
7.10

2.74  
2.72  
2.70  
2.68  
2.67  
2.65  
2.63  
2.52  
2.50  
2.48  
1.94  
1.92  
1.90  
1.88  
1.86

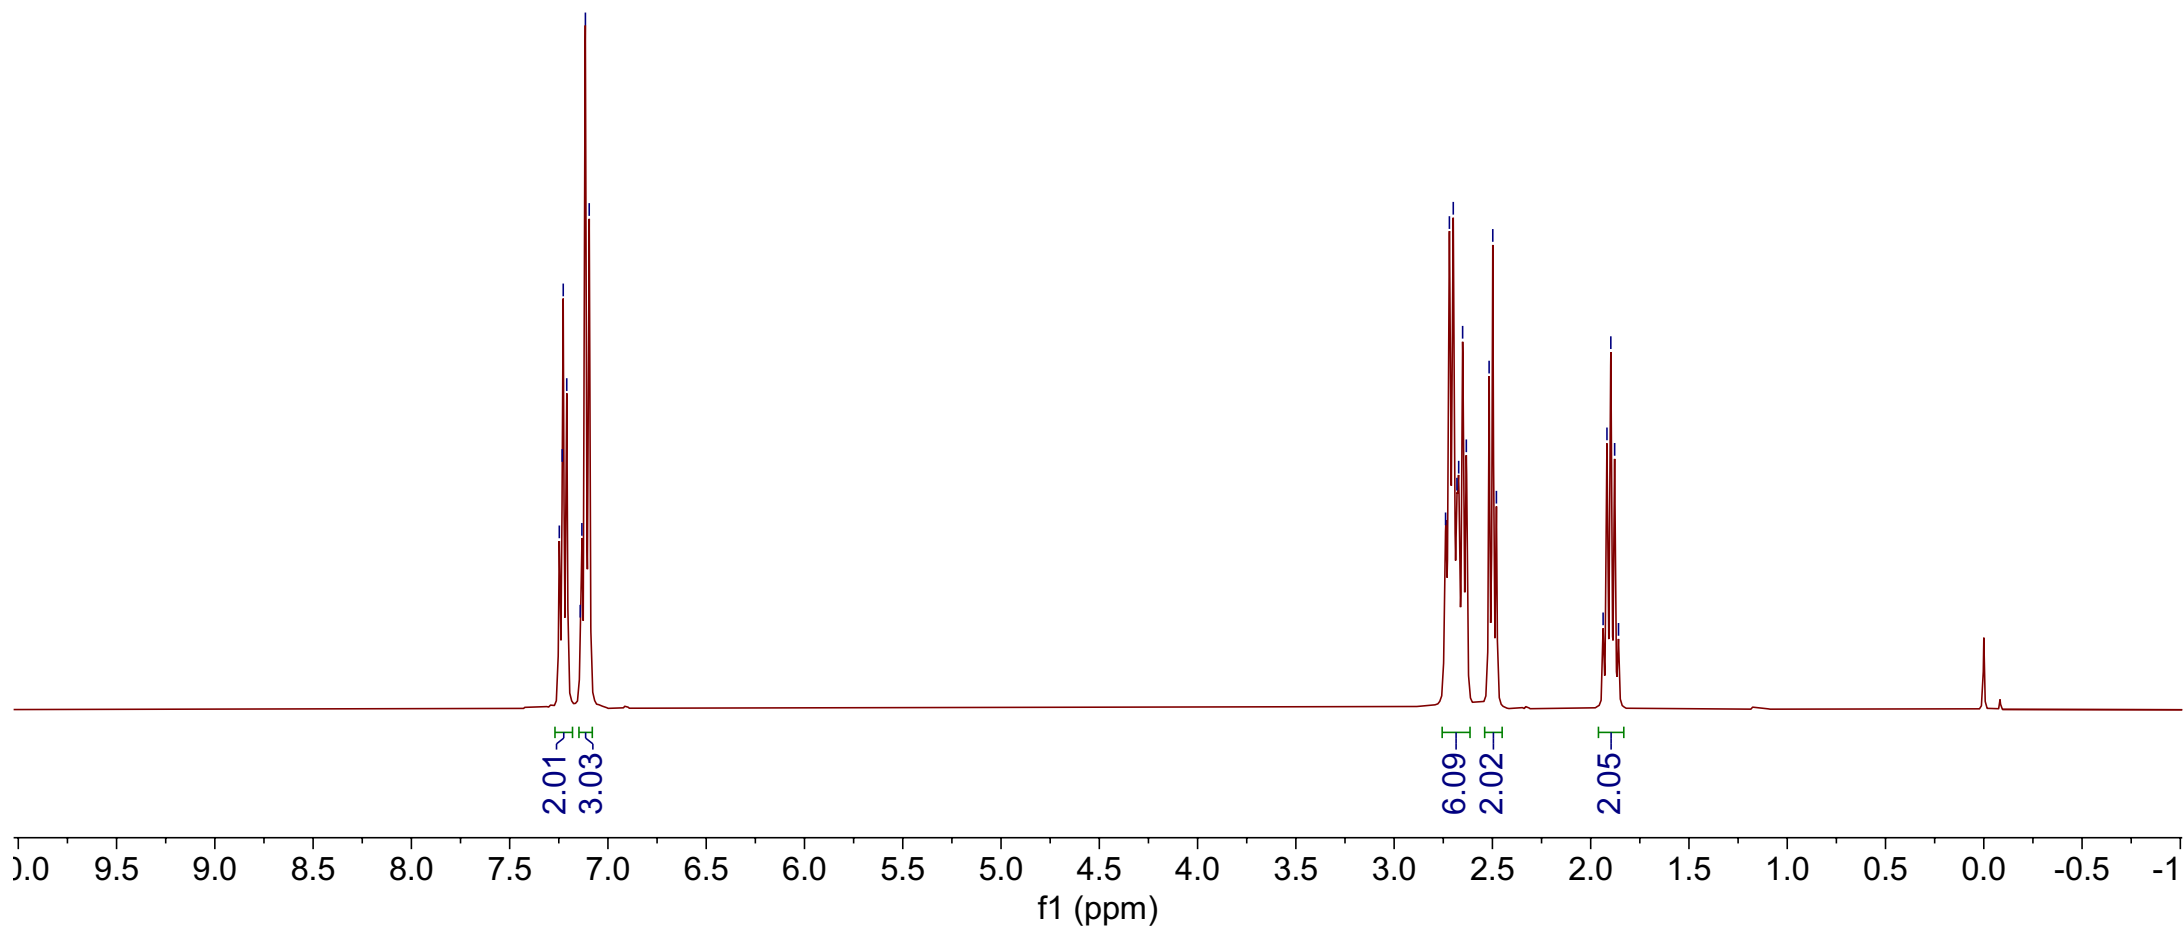

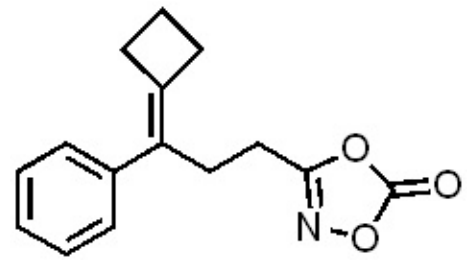

1w

—166.39

—154.18

—141.30

—138.04

128.48

127.47

127.26

126.73

—31.72

—30.53

—25.91

—23.96

—16.88

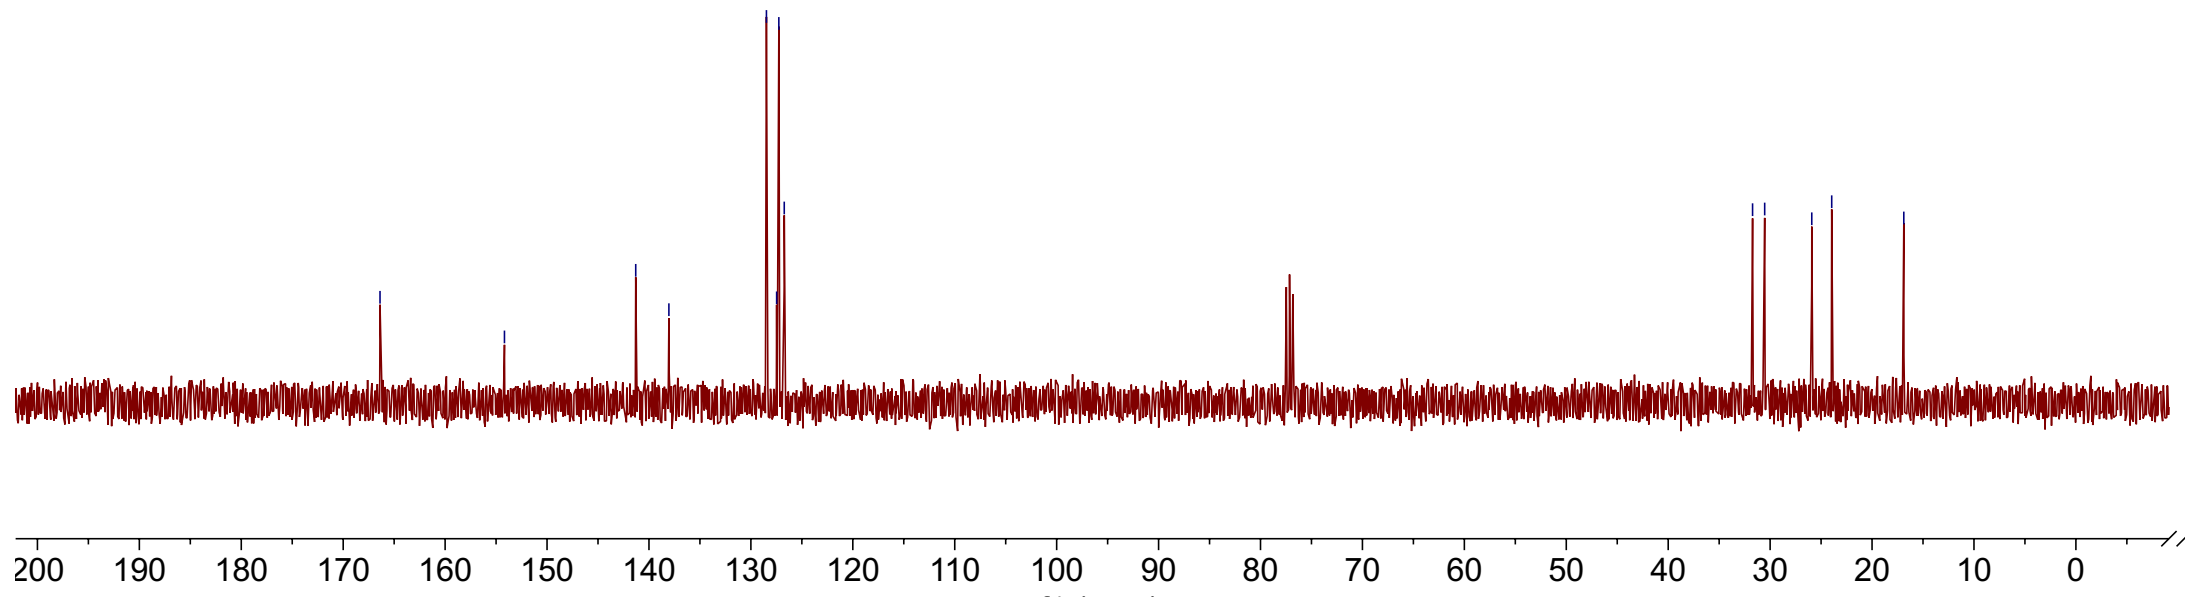

f1 (ppm)

xgc-1-184.1.fid  
1110-DY  
0

7.22  
7.20  
7.19  
7.12  
7.10  
7.08  
7.05  
7.03

2.70  
2.68  
2.66  
2.47  
2.45  
2.43  
2.29  
2.27  
2.25  
2.06  
2.05  
2.03  
1.66  
1.64  
1.62  
1.60  
1.59  
1.50  
1.48  
1.47  
1.45  
1.43

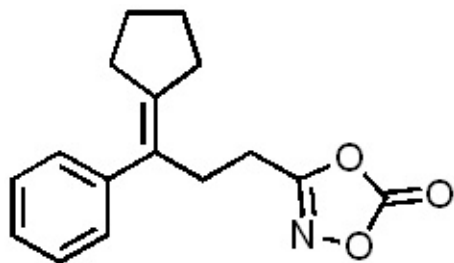

1x

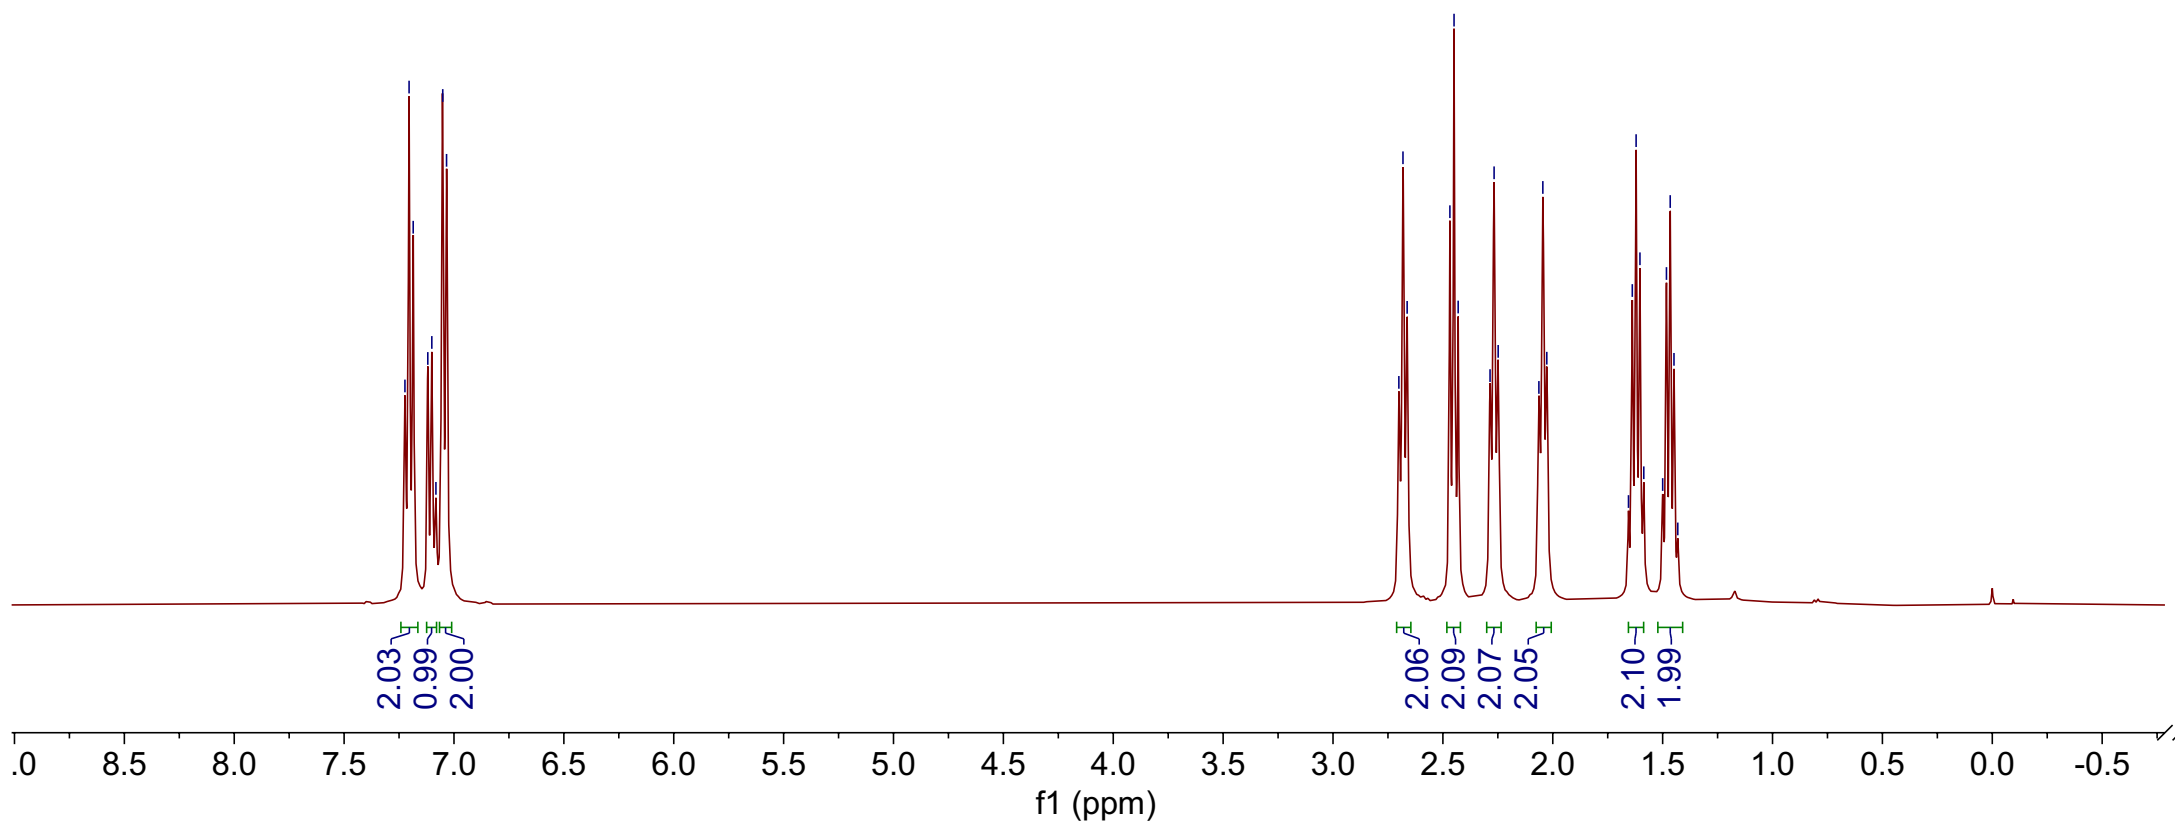

— 166.50

— 154.14

~ 143.51

~ 141.62

{ 128.42

{ 128.38

{ 128.06

{ 126.67

{ 32.56

{ 30.73

{ 29.95

{ 26.81

{ 26.45

{ 23.65

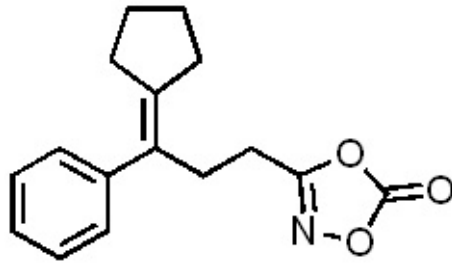

1x

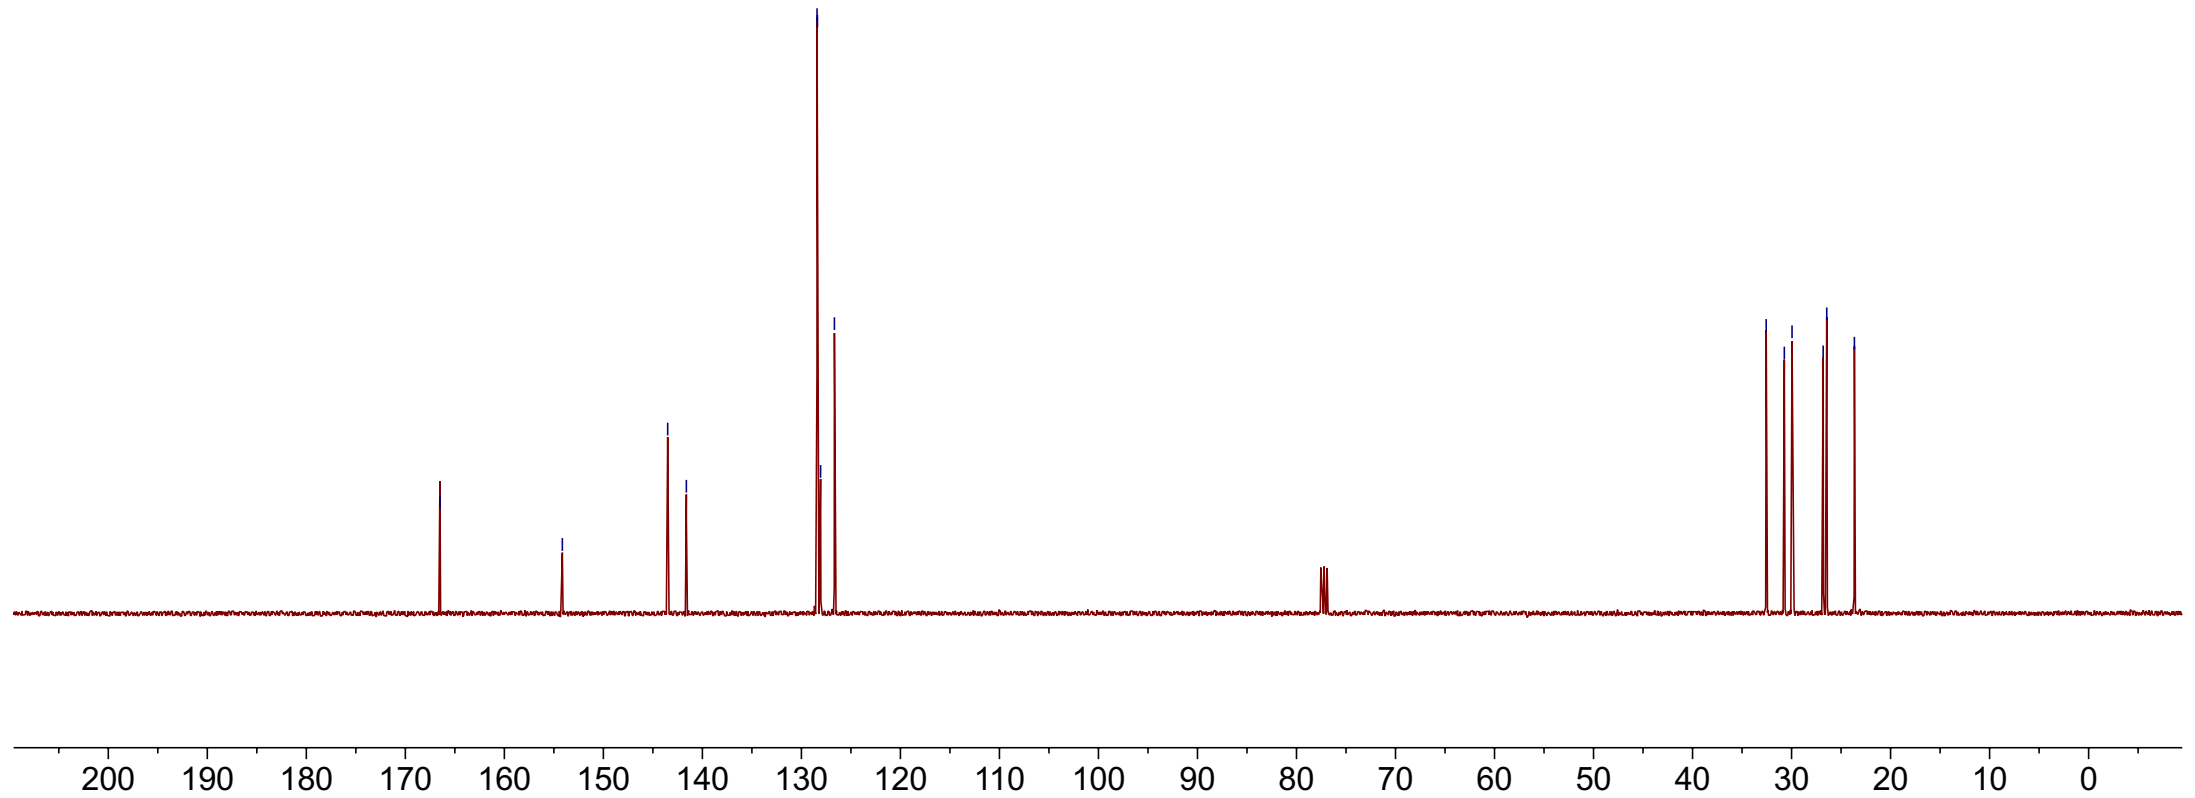

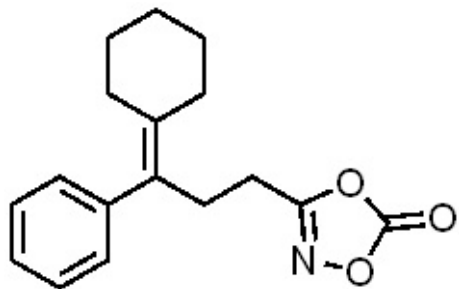

1y

7.27  
7.26  
7.25  
7.24  
7.23  
7.18  
7.18  
7.18  
7.17  
7.17  
7.16  
7.15  
7.14  
7.02  
7.01  
7.00  
6.99

2.73  
2.71  
2.69  
2.48  
2.46  
2.44  
2.22  
2.20  
2.19  
1.90  
1.88  
1.88  
1.87  
1.52  
1.52  
1.51  
1.50  
1.50  
1.49  
1.48  
1.47  
1.38  
1.38  
1.36  
1.35

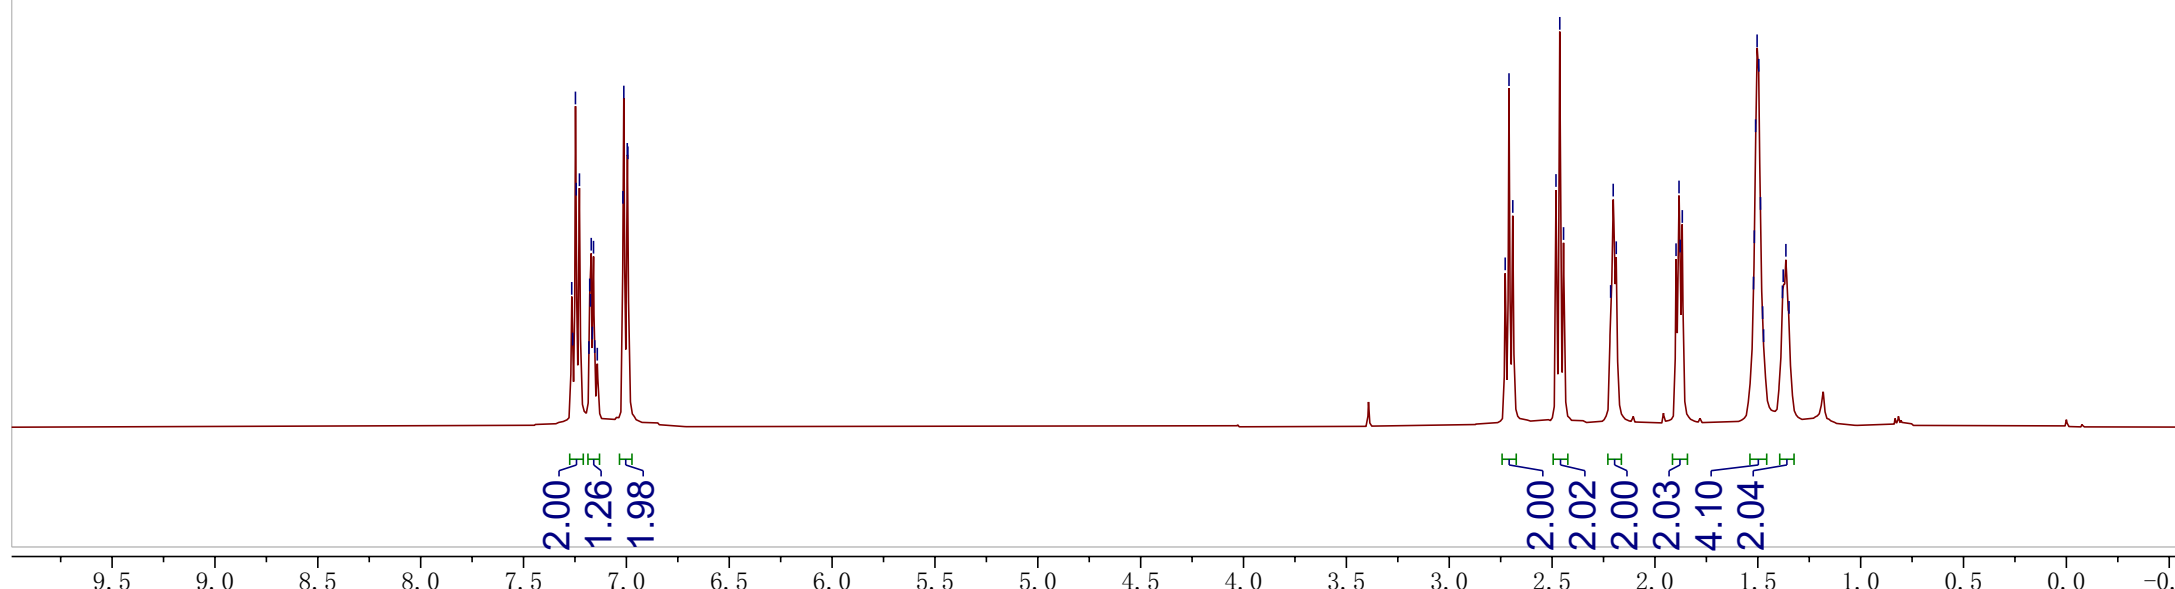

2.00  
1.26  
1.98

2.00  
2.02  
2.00  
2.03  
4.10  
2.04

xgc-2-82.2.fid  
1D 13C with H decoupling

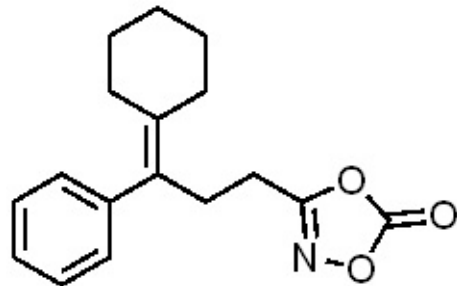

1y

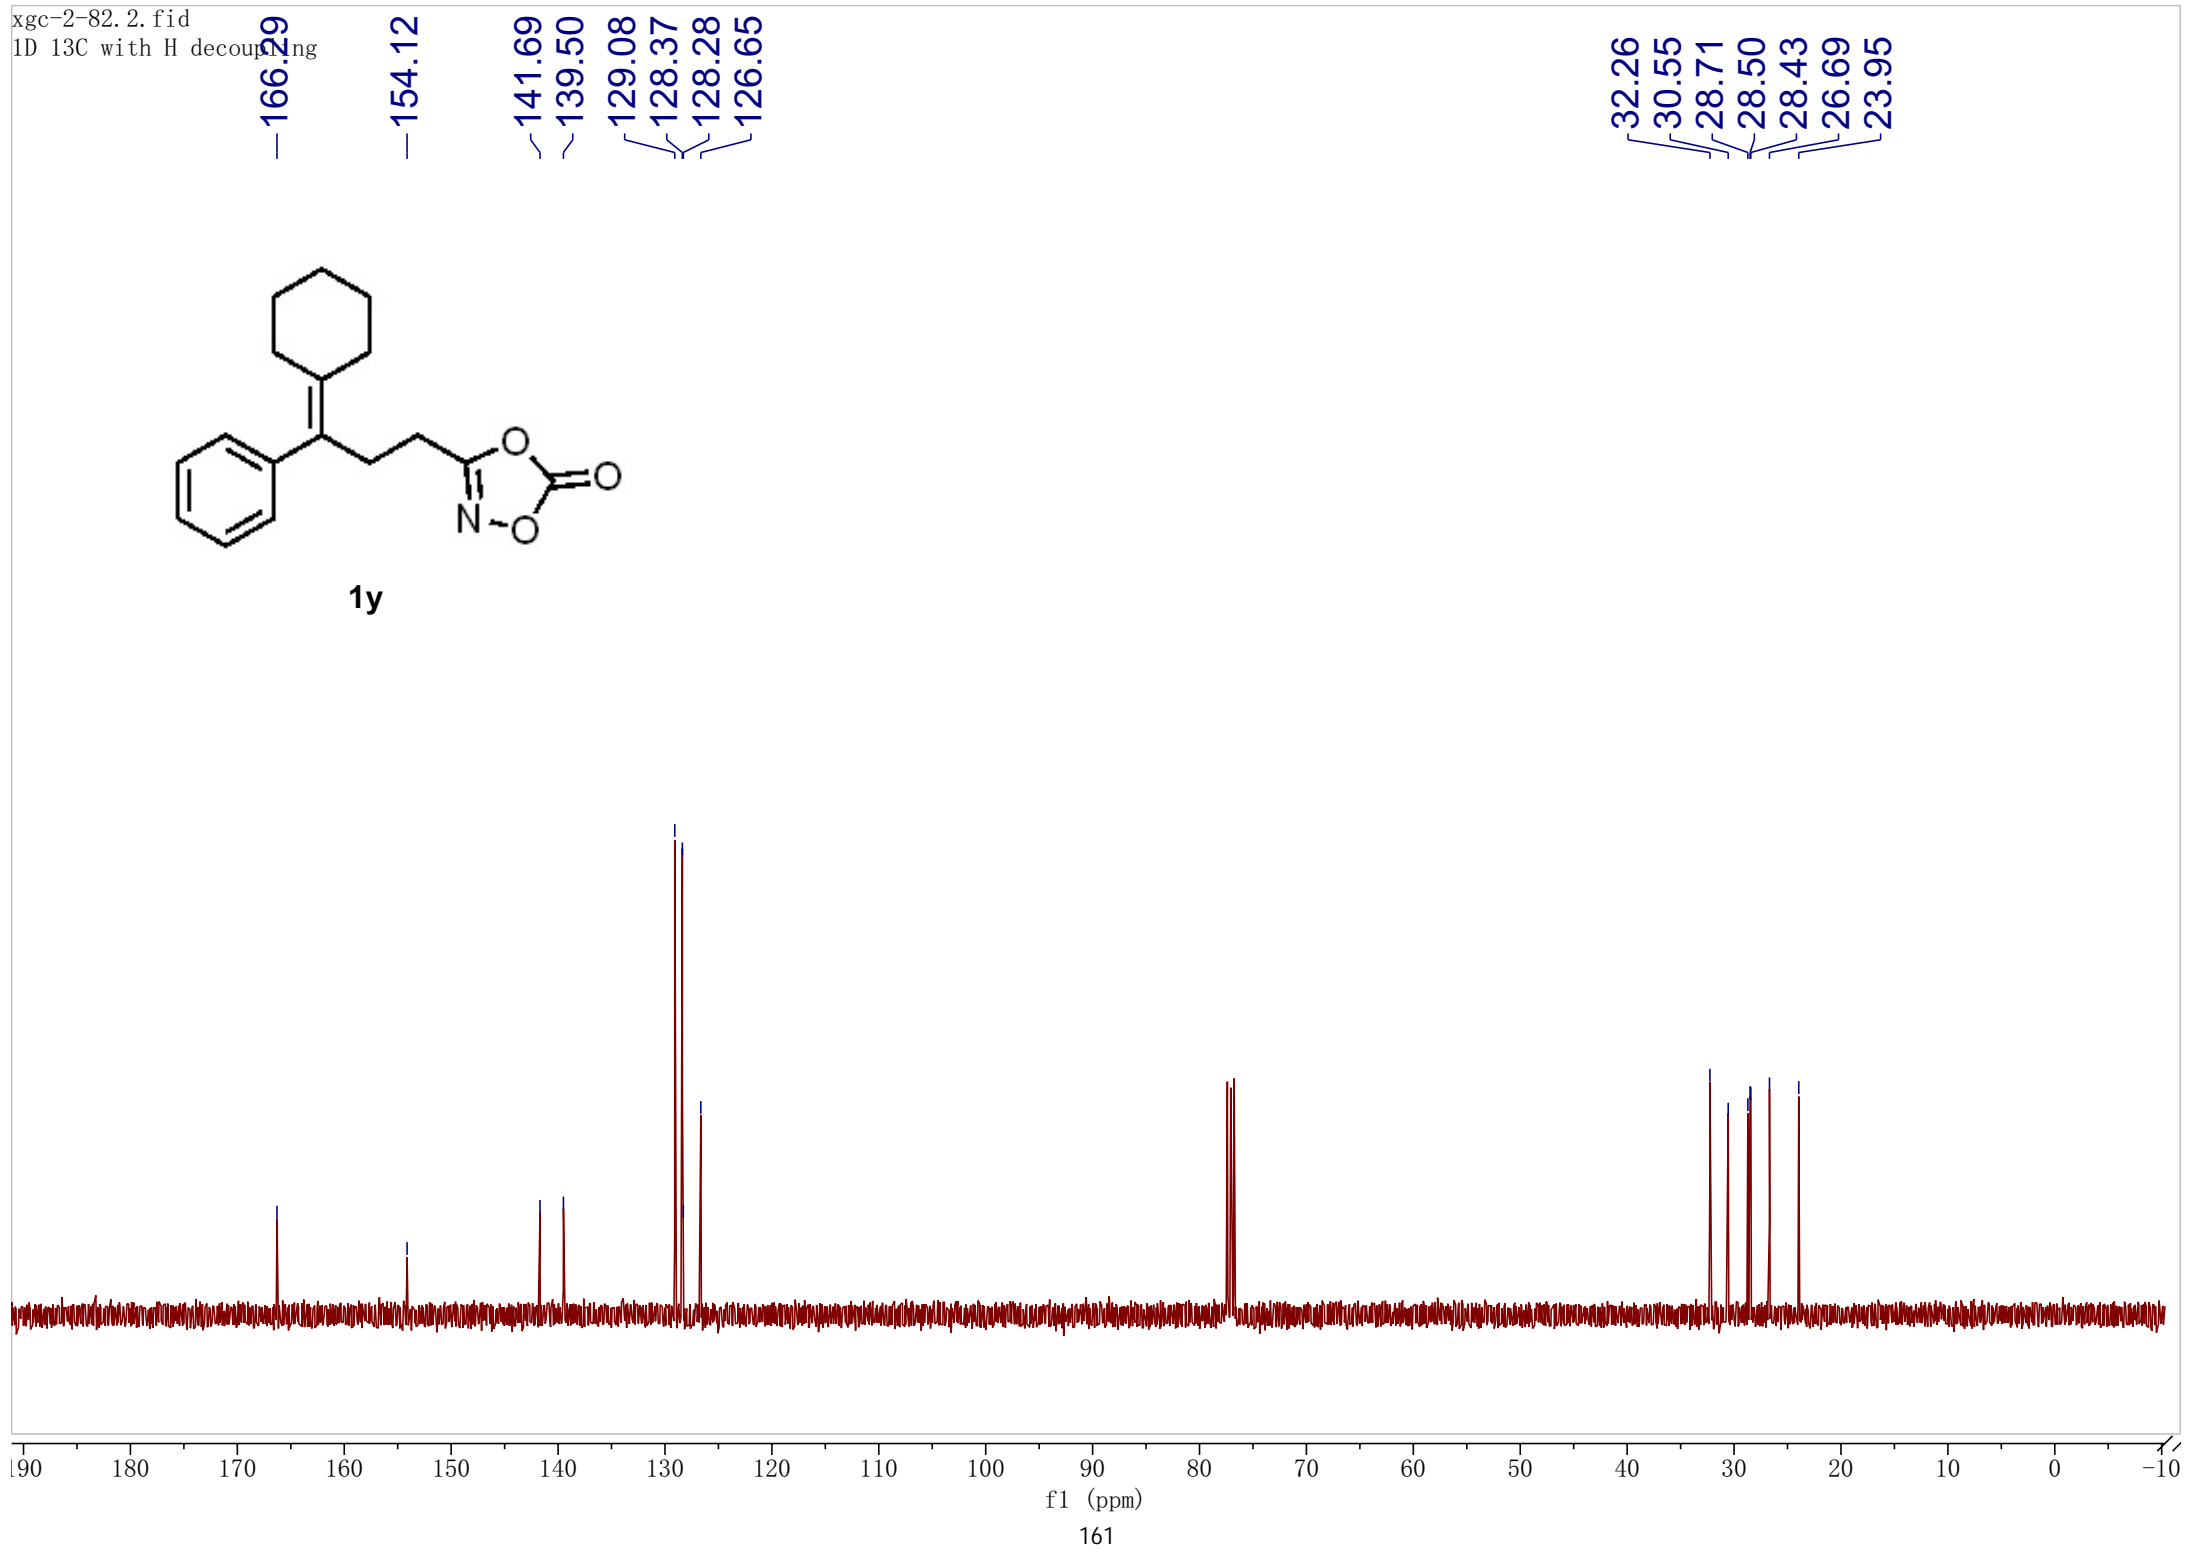

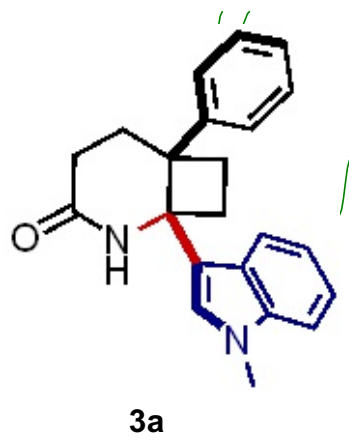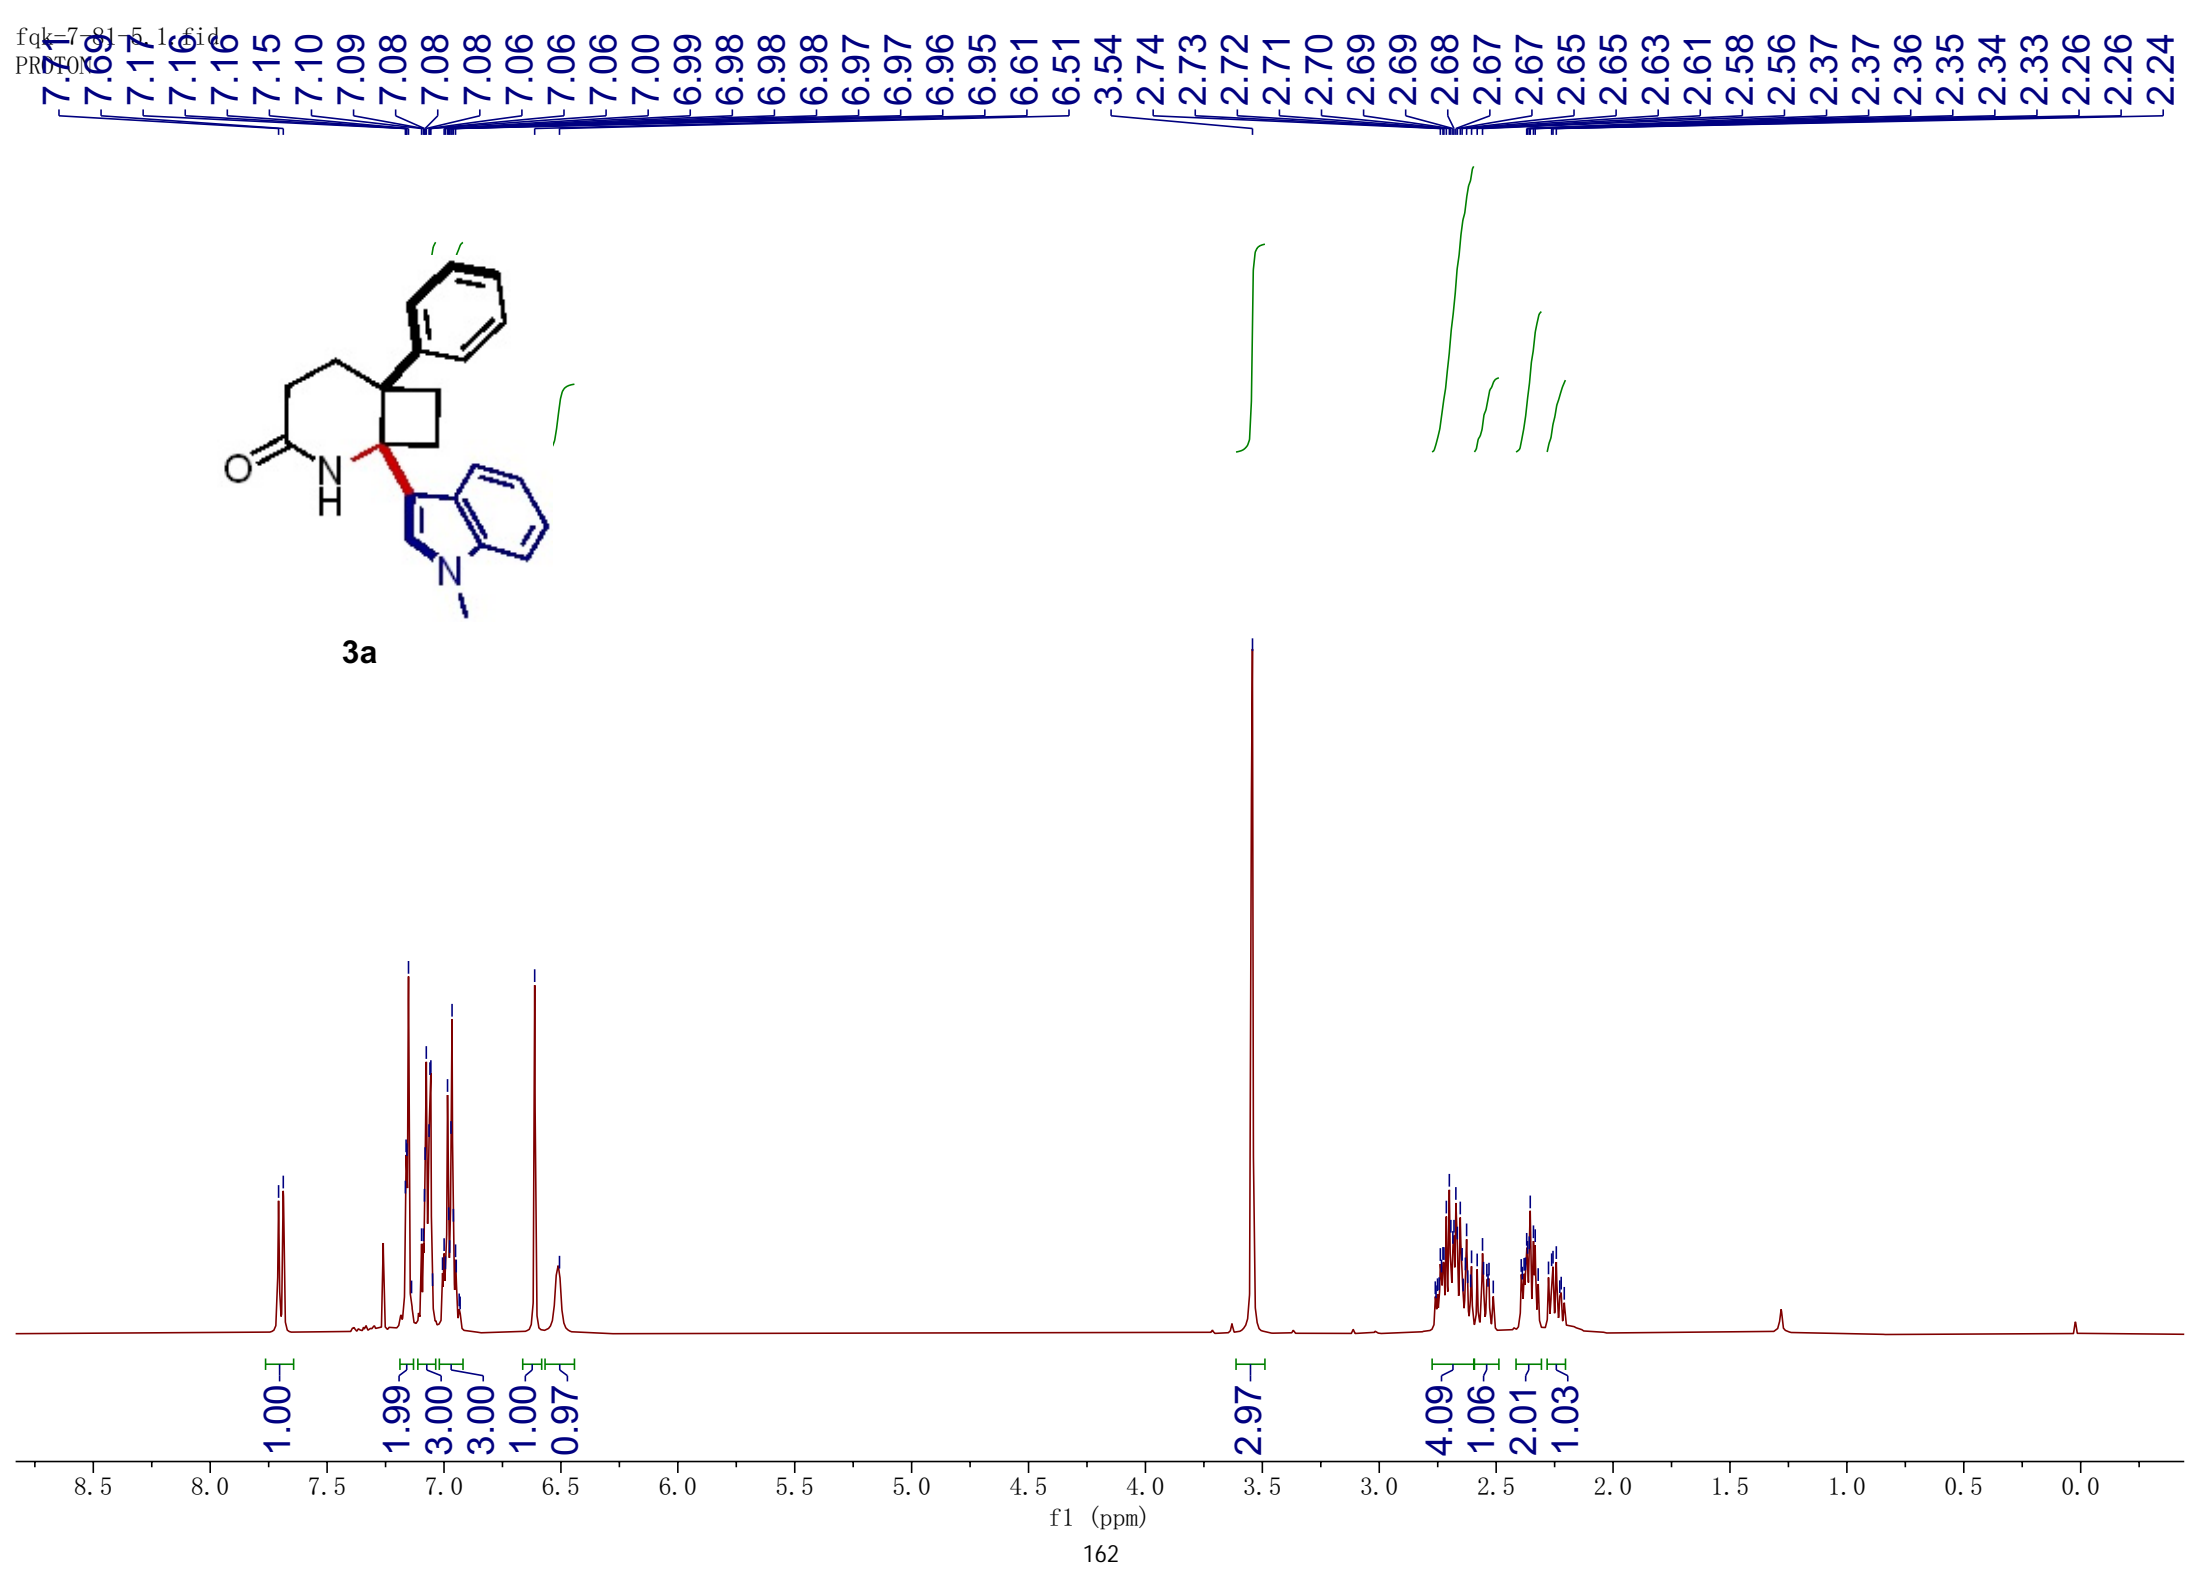

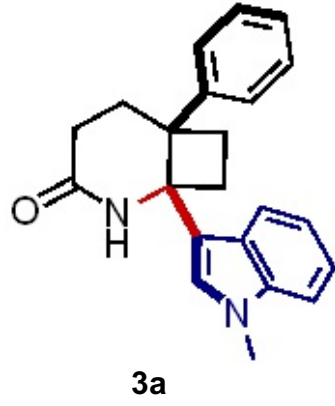

-172.92

-144.78

-137.43

-127.01

-126.45

-126.31

-125.90

-121.63

-120.56

-119.55

-116.21

-109.45

-62.56

-50.38

35.52

34.89

32.71

28.99

25.64

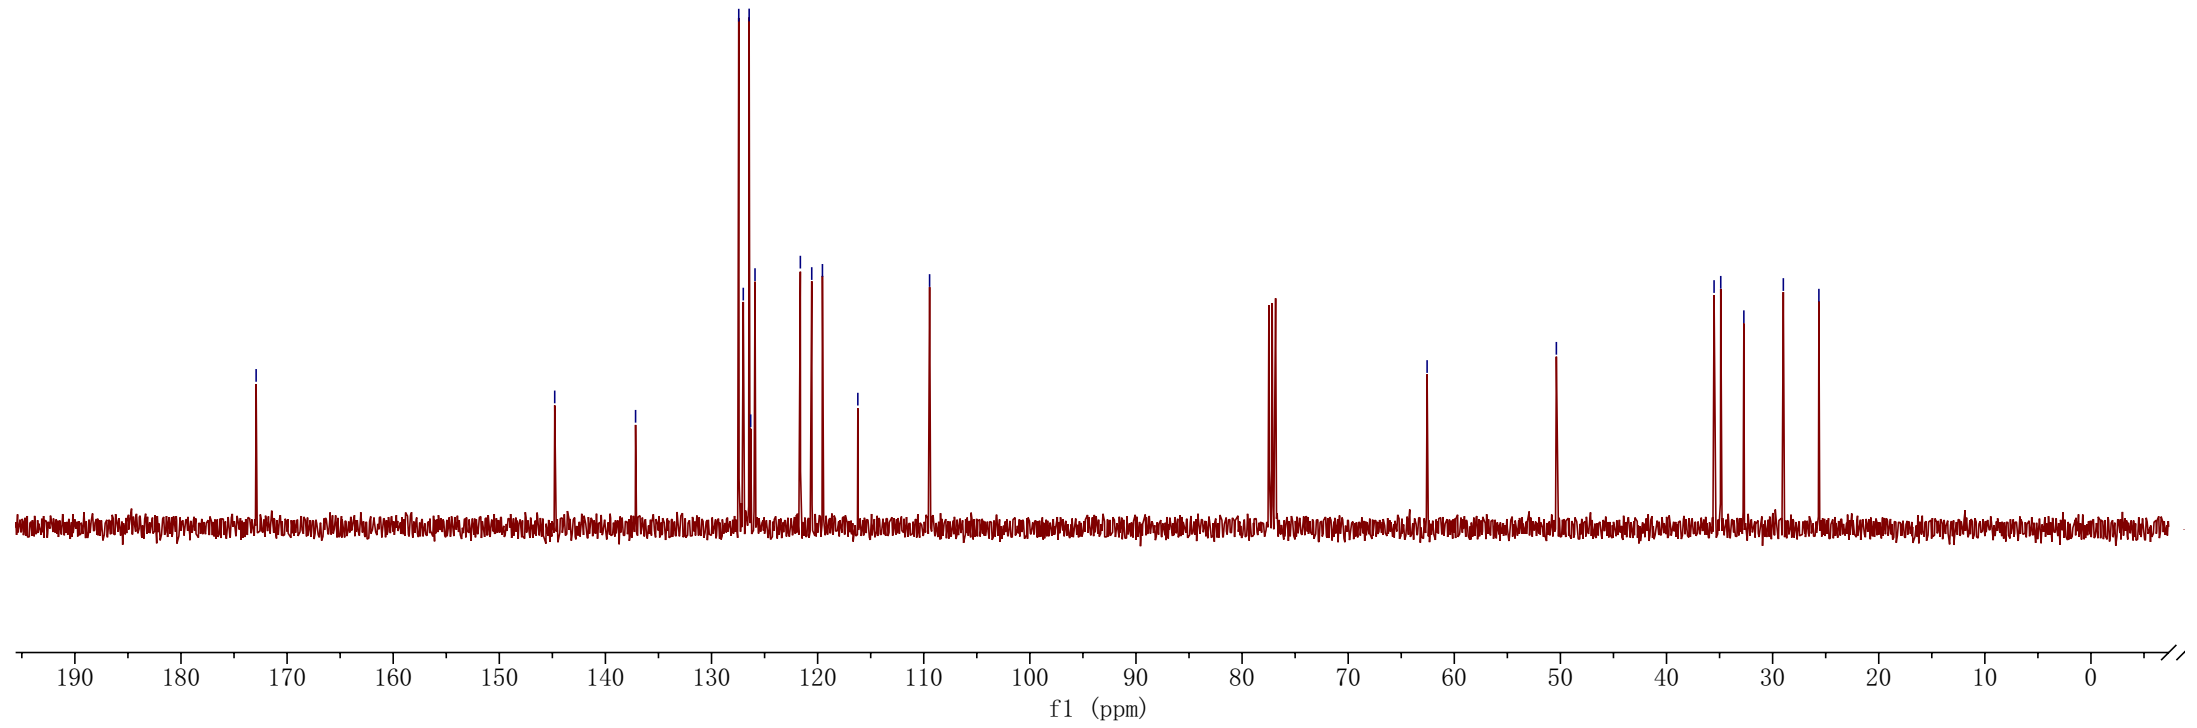

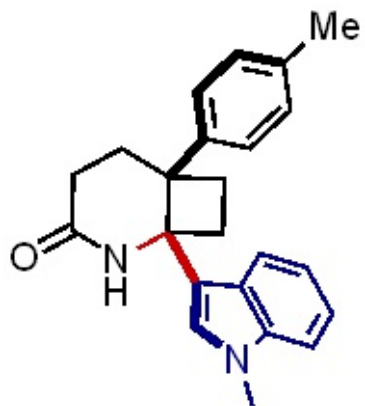

3b

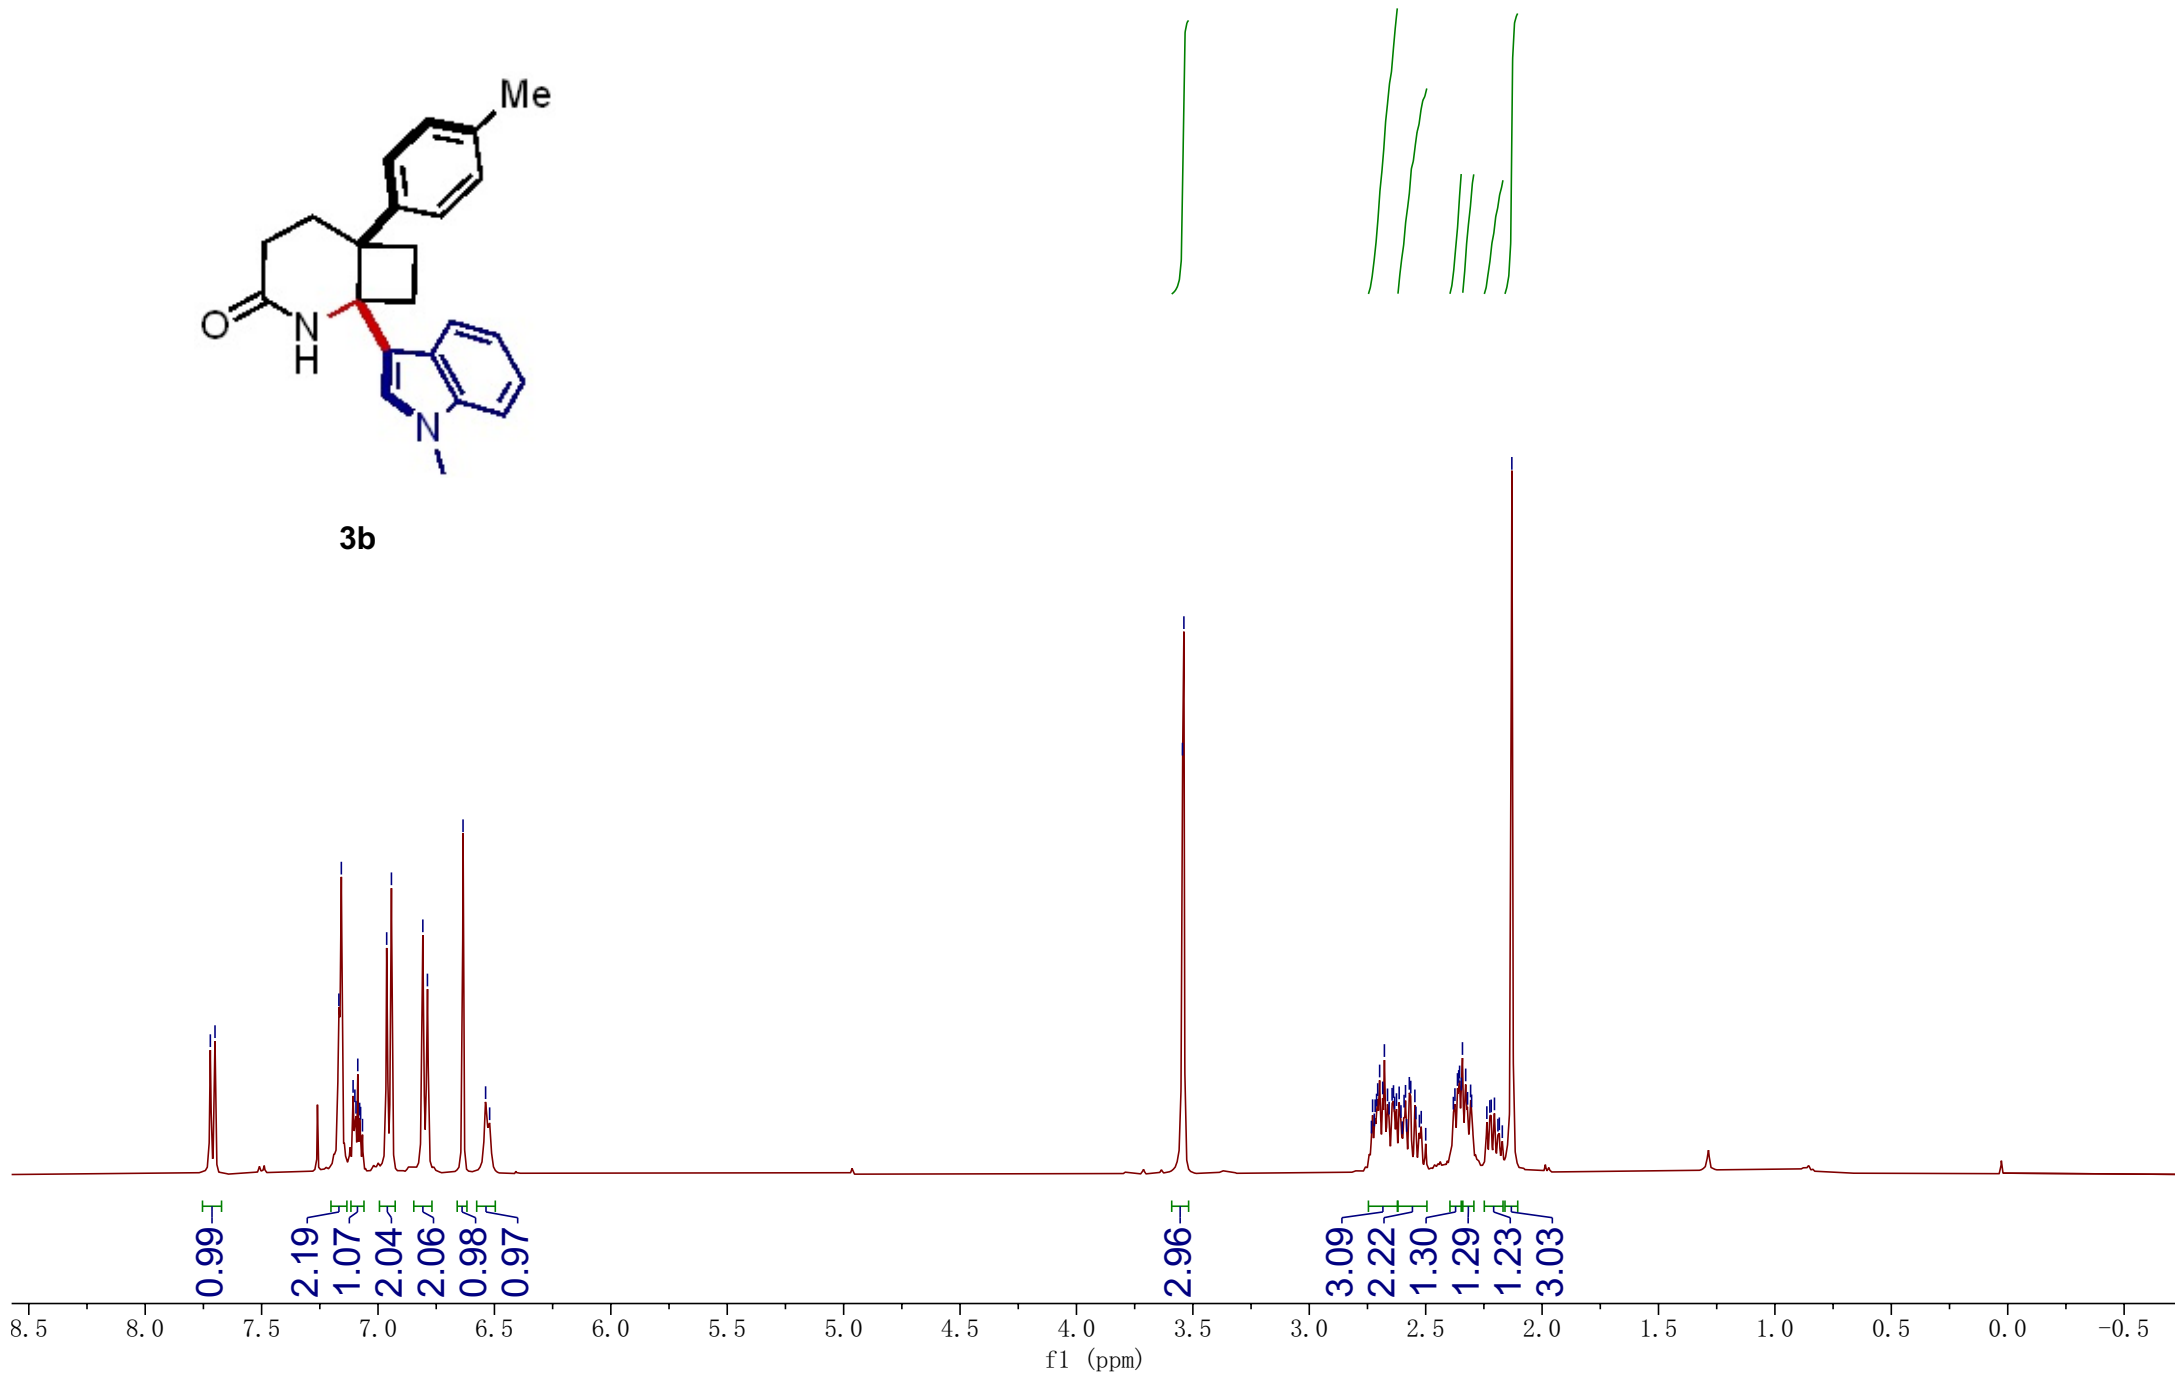

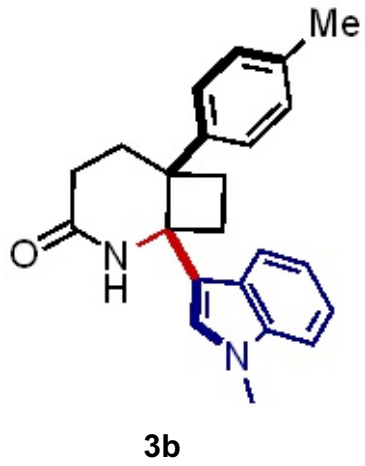

172.91  
141.81  
137.12  
135.27  
128.15  
127.04  
126.36  
126.28  
121.55  
120.57  
119.51  
116.21  
109.42

62.48

49.99

35.47  
34.99  
32.69  
28.86  
25.71  
20.78

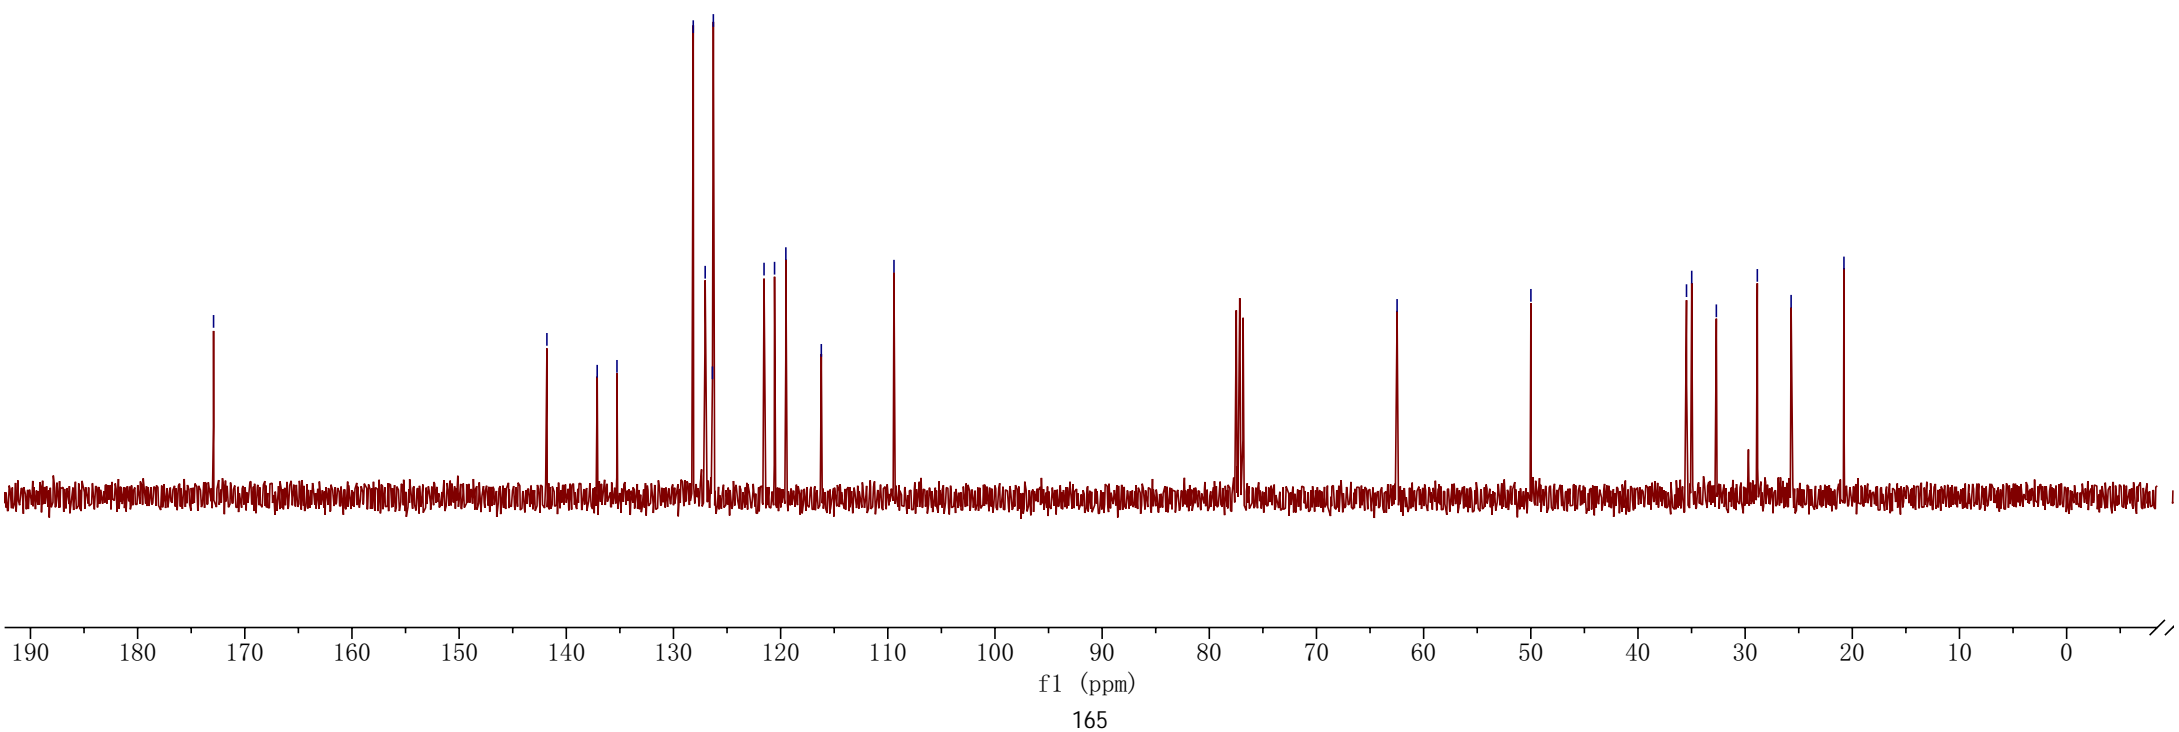

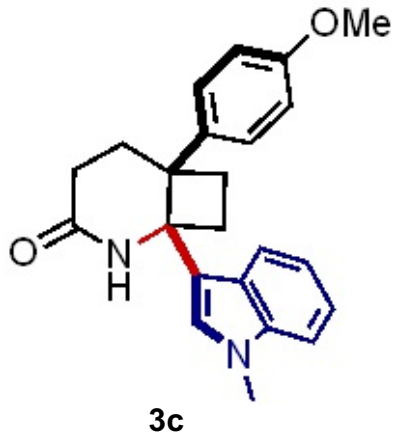

7.68  
7.66  
7.15  
7.09  
7.08  
7.07  
7.06  
7.05  
6.98  
6.96  
6.61  
6.53  
6.50  
6.48

3.61  
3.56

2.71  
2.70  
2.68  
2.66  
2.65  
2.58  
2.56  
2.54  
2.53  
2.50  
2.35  
2.33  
2.31  
2.29  
2.28  
2.25  
2.23  
2.22

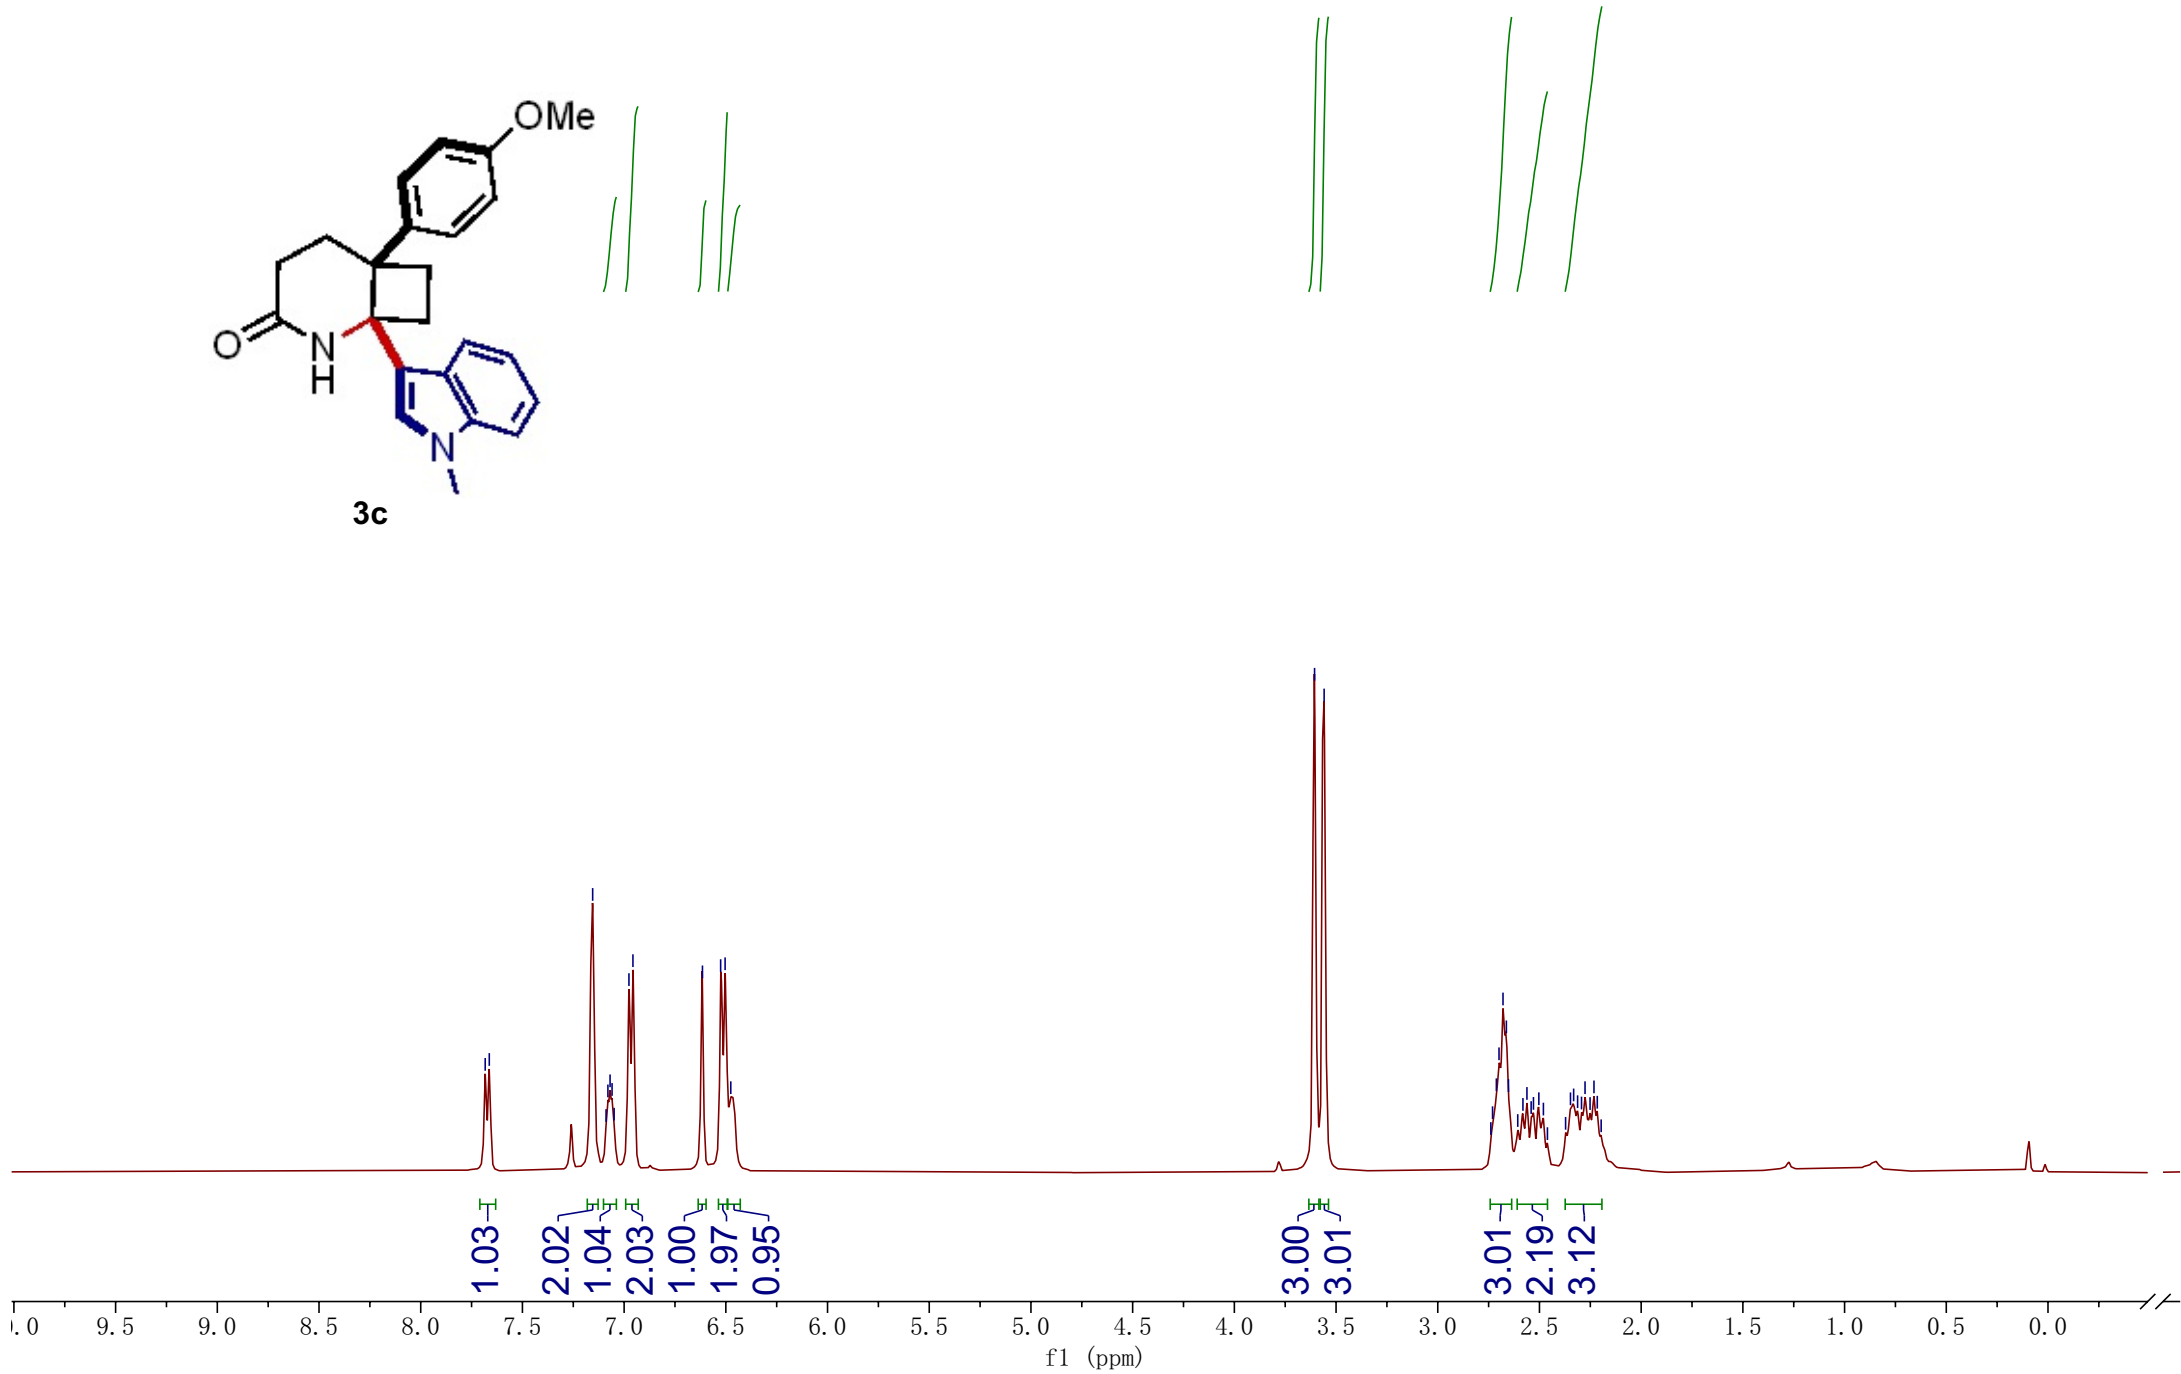

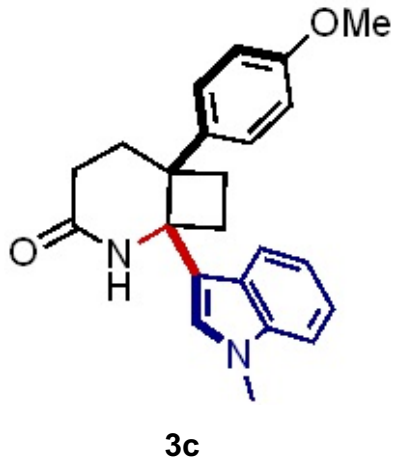

—172.90

—157.57

137.23

136.85

127.52

127.10

126.34

121.64

120.57

119.57

116.29

112.84

109.48

62.63

55.07

49.80

35.27

34.76

32.75

29.07

25.53

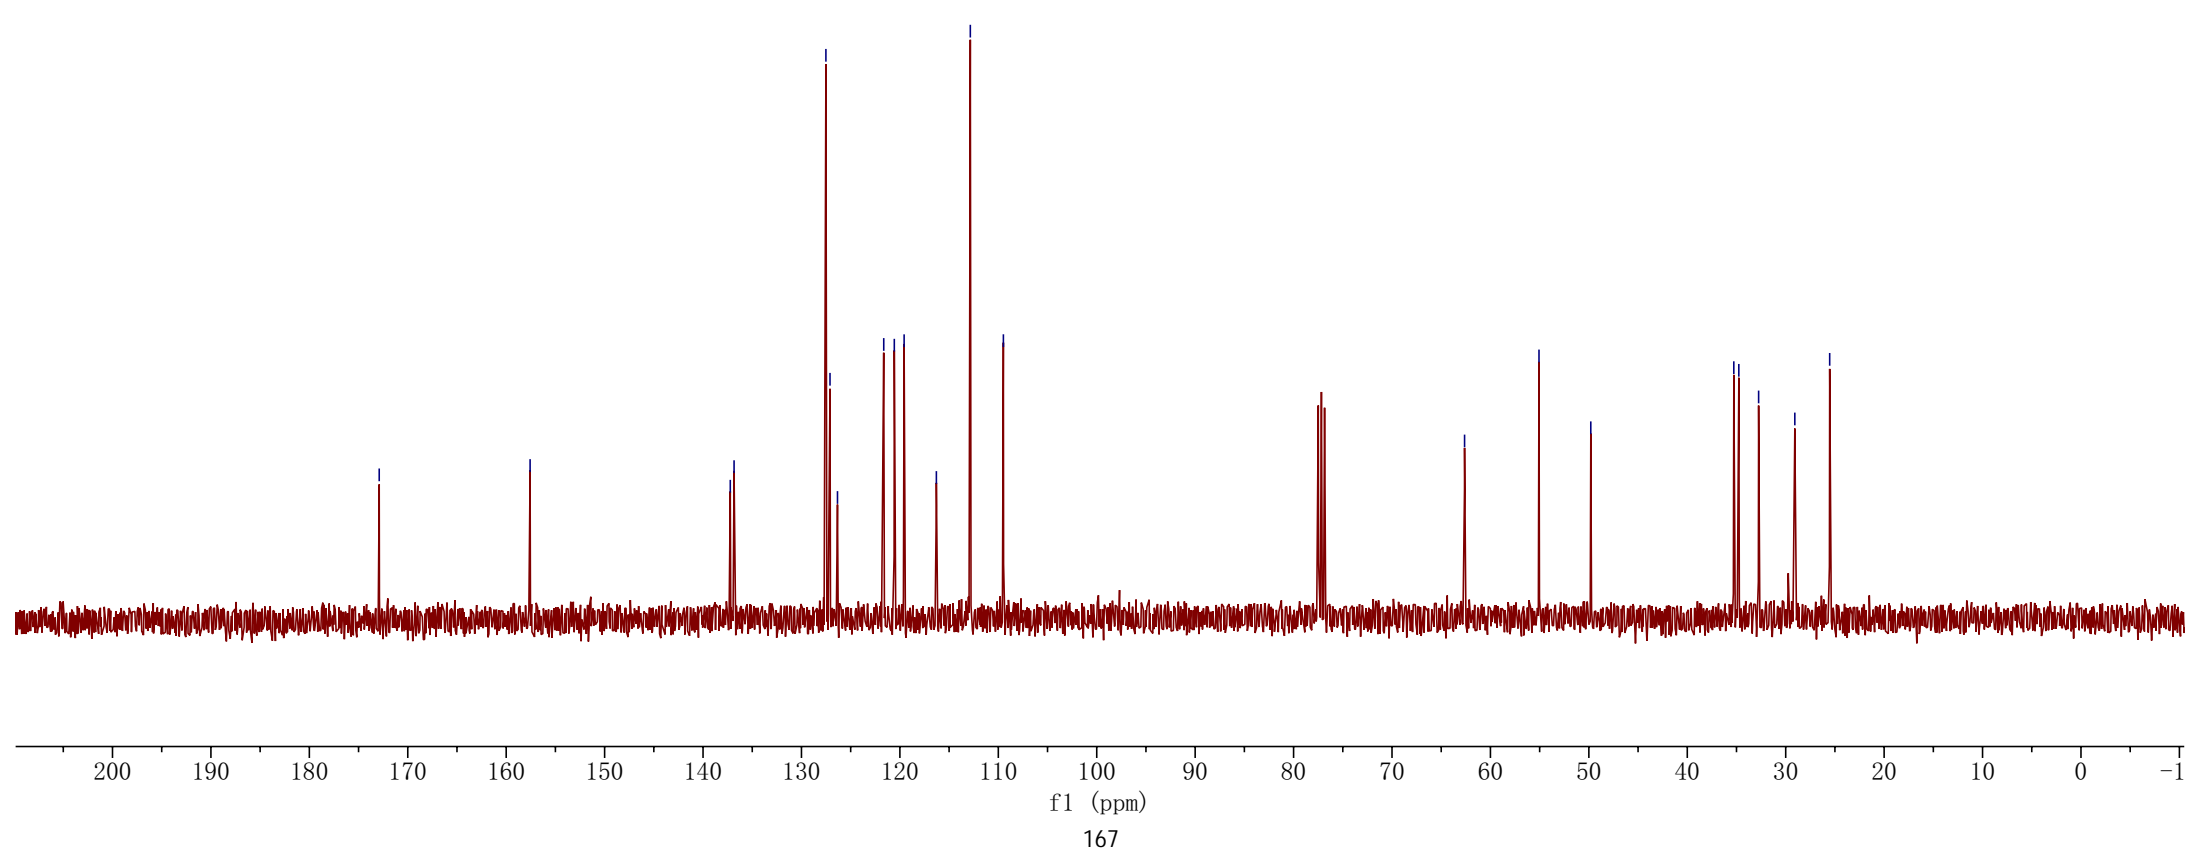

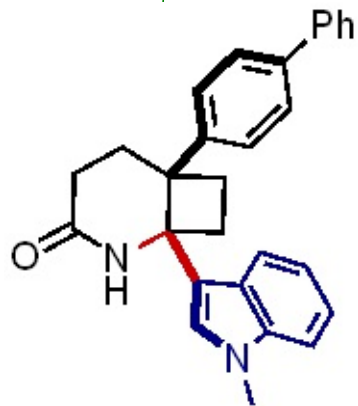

3d

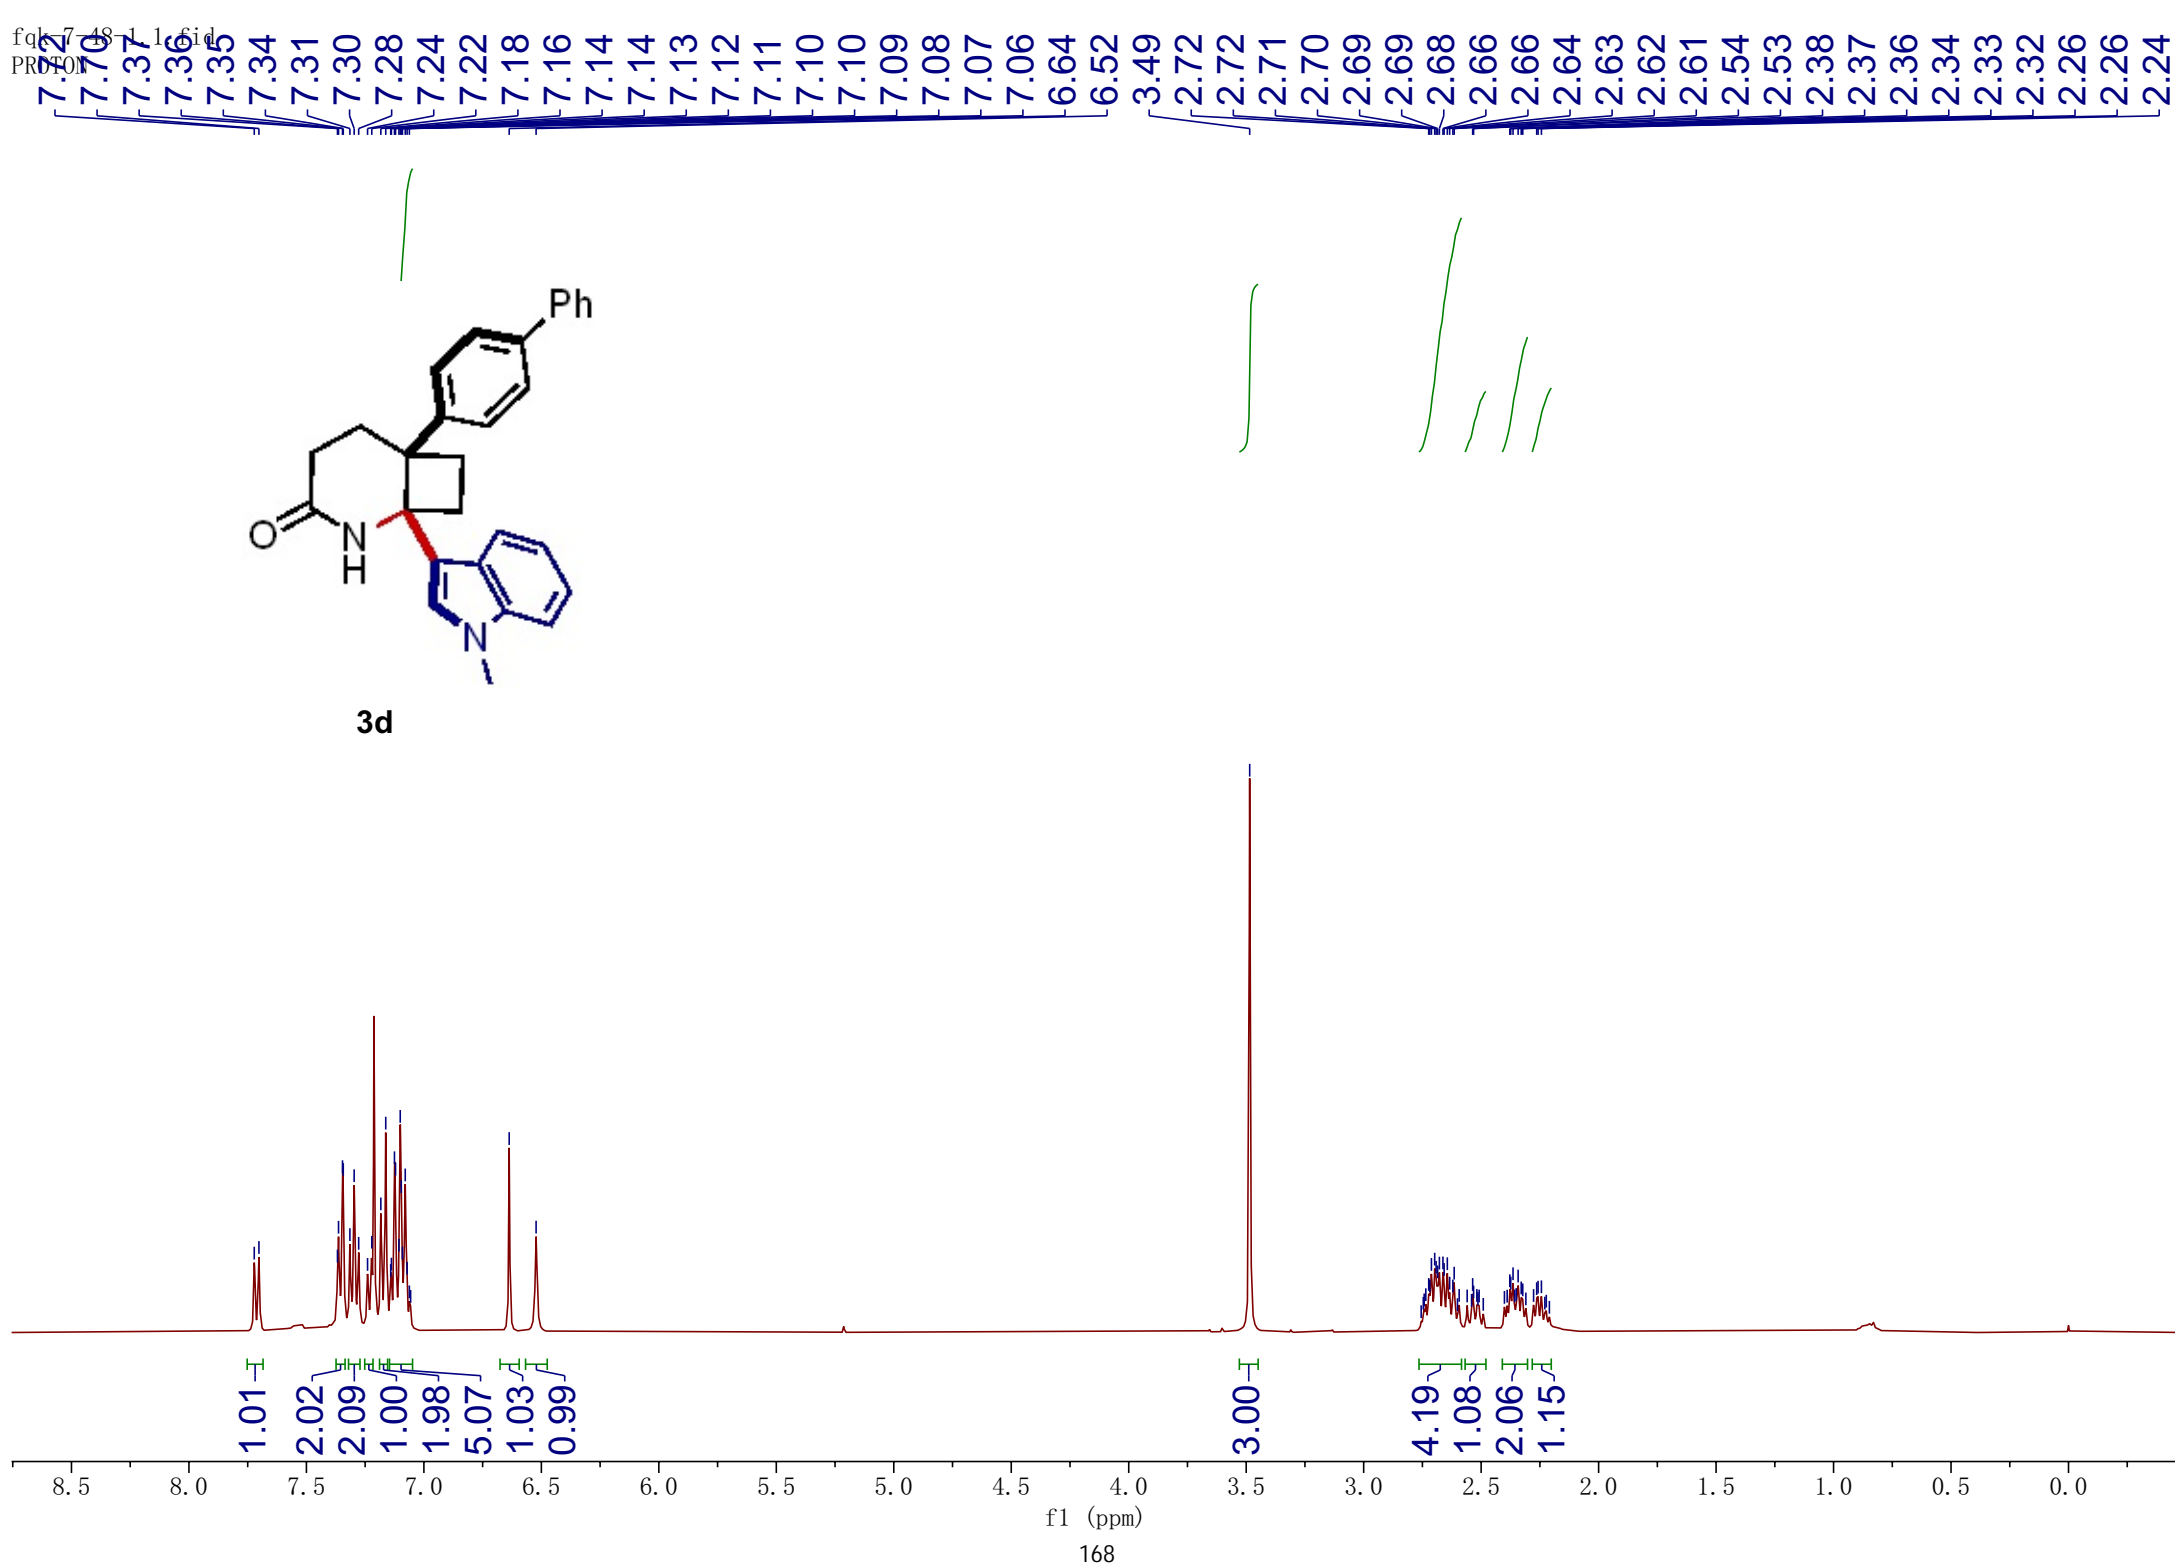

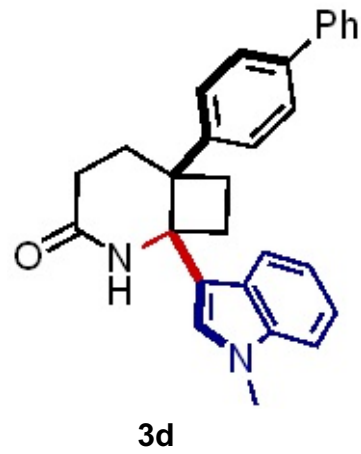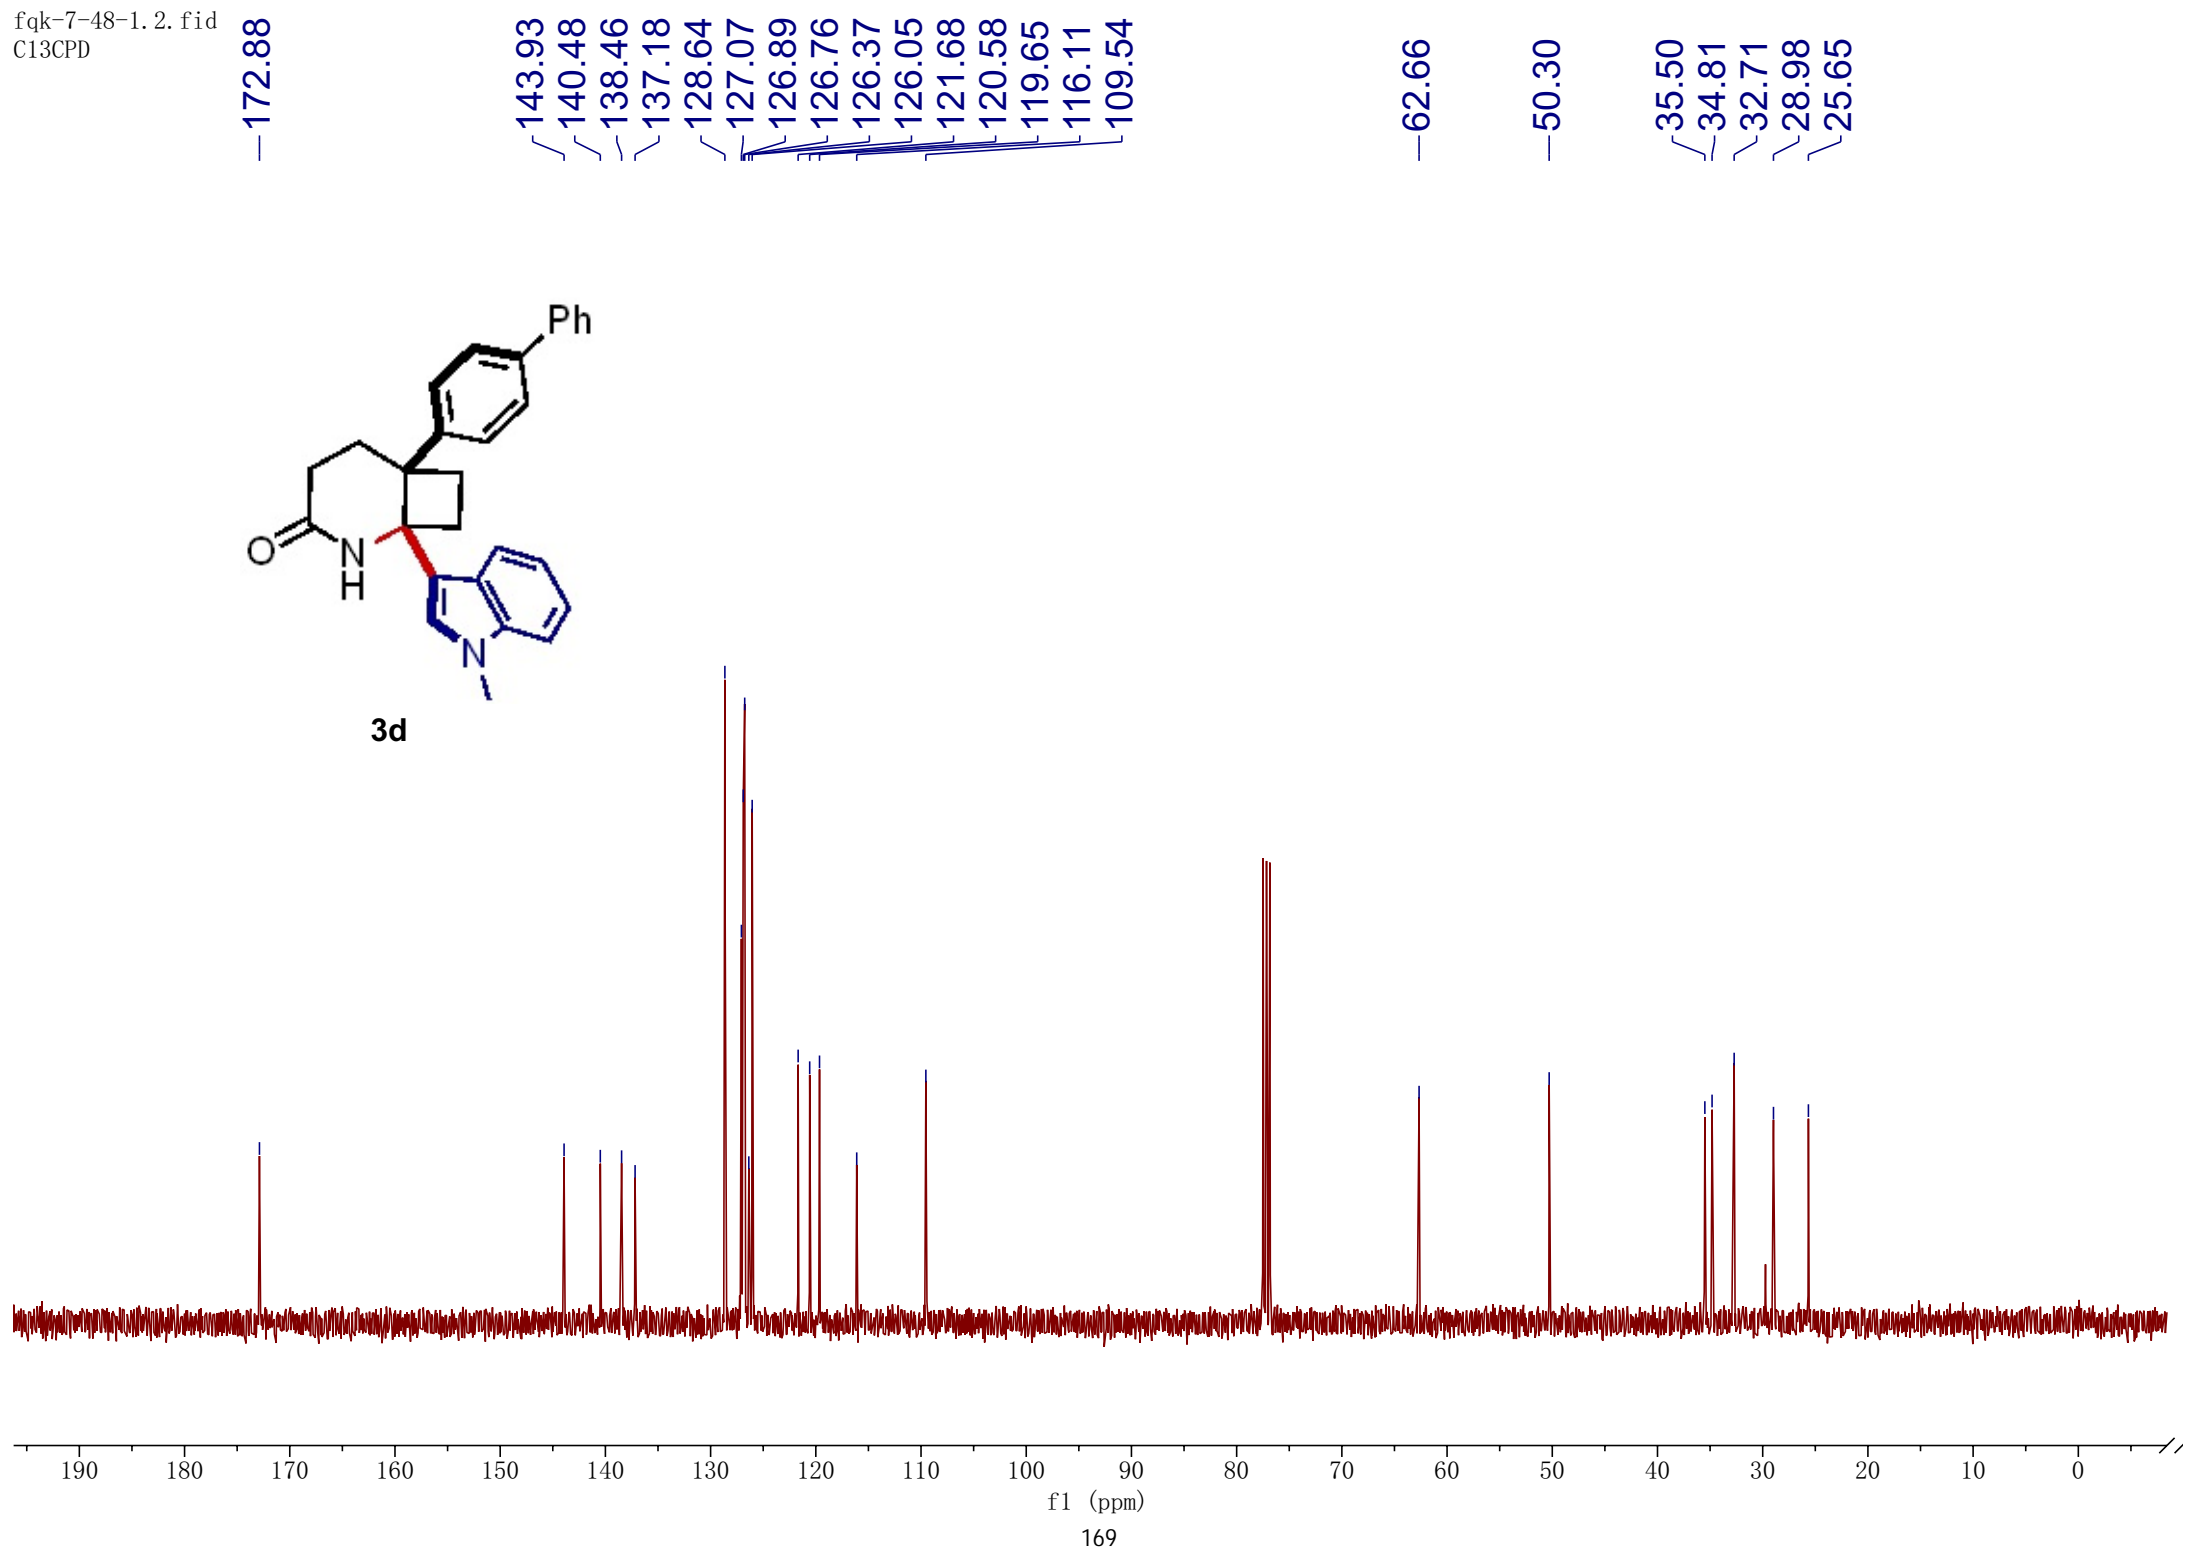

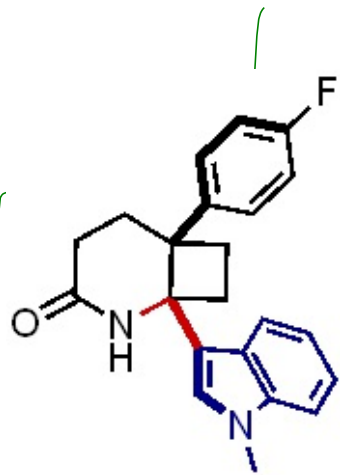

3e

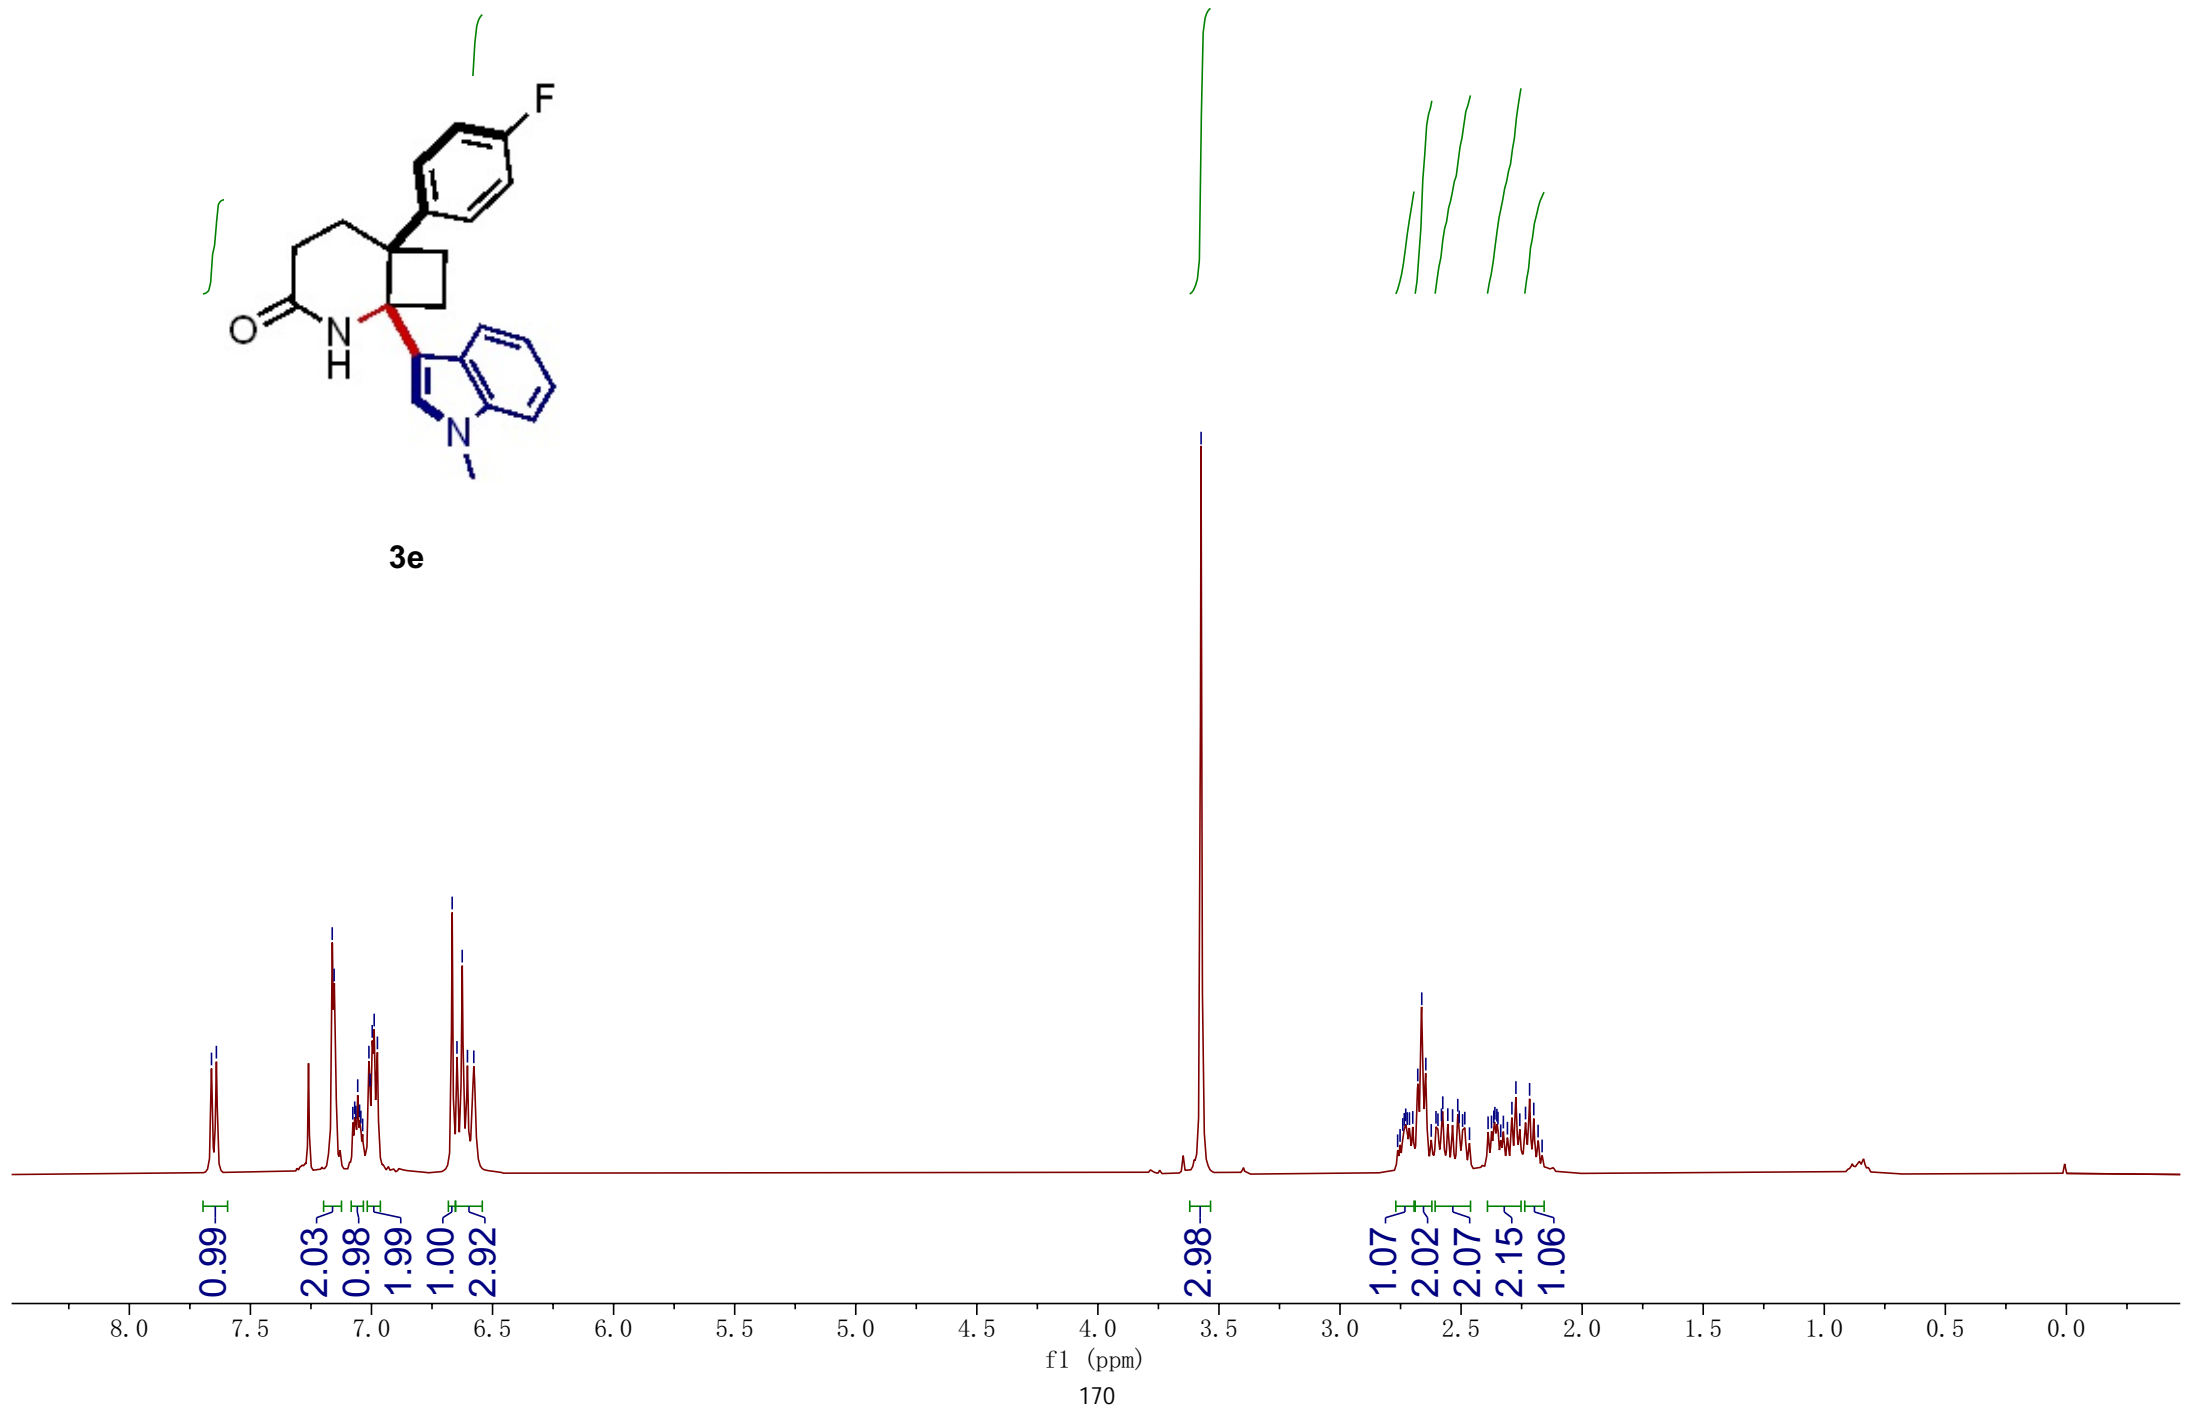

—172.92

~162.13

~159.71

~140.46

~137.23

128.00

127.93

127.02

126.18

121.73

120.47

119.64

116.01

114.26

114.05

109.54

—62.56

—50.02

35.19

34.70

32.76

29.00

25.59

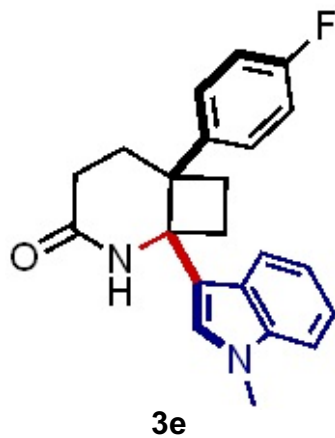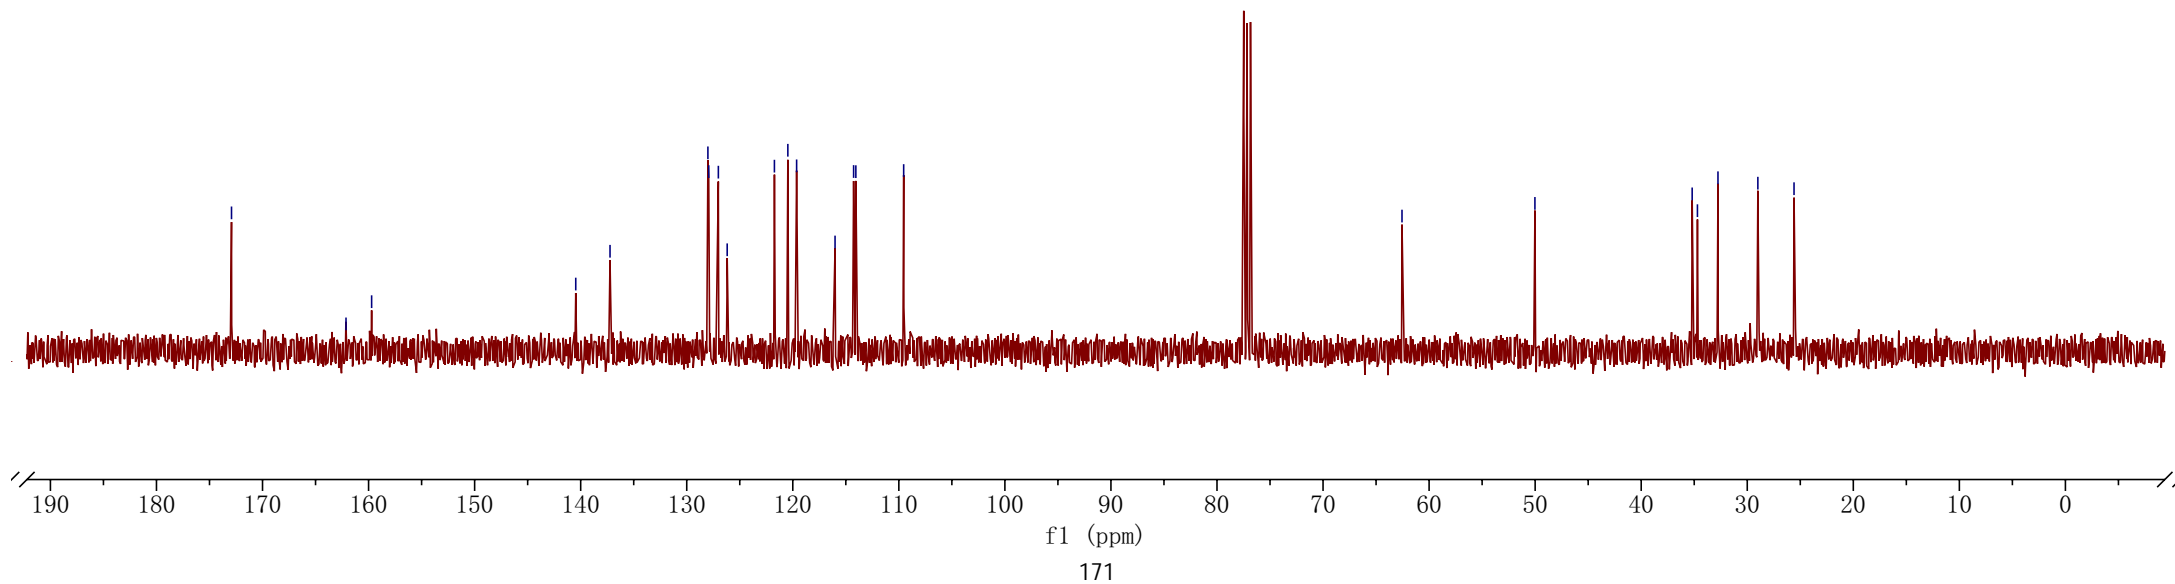

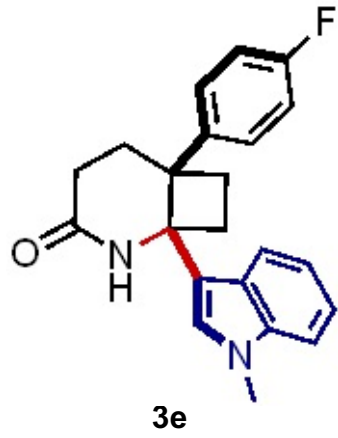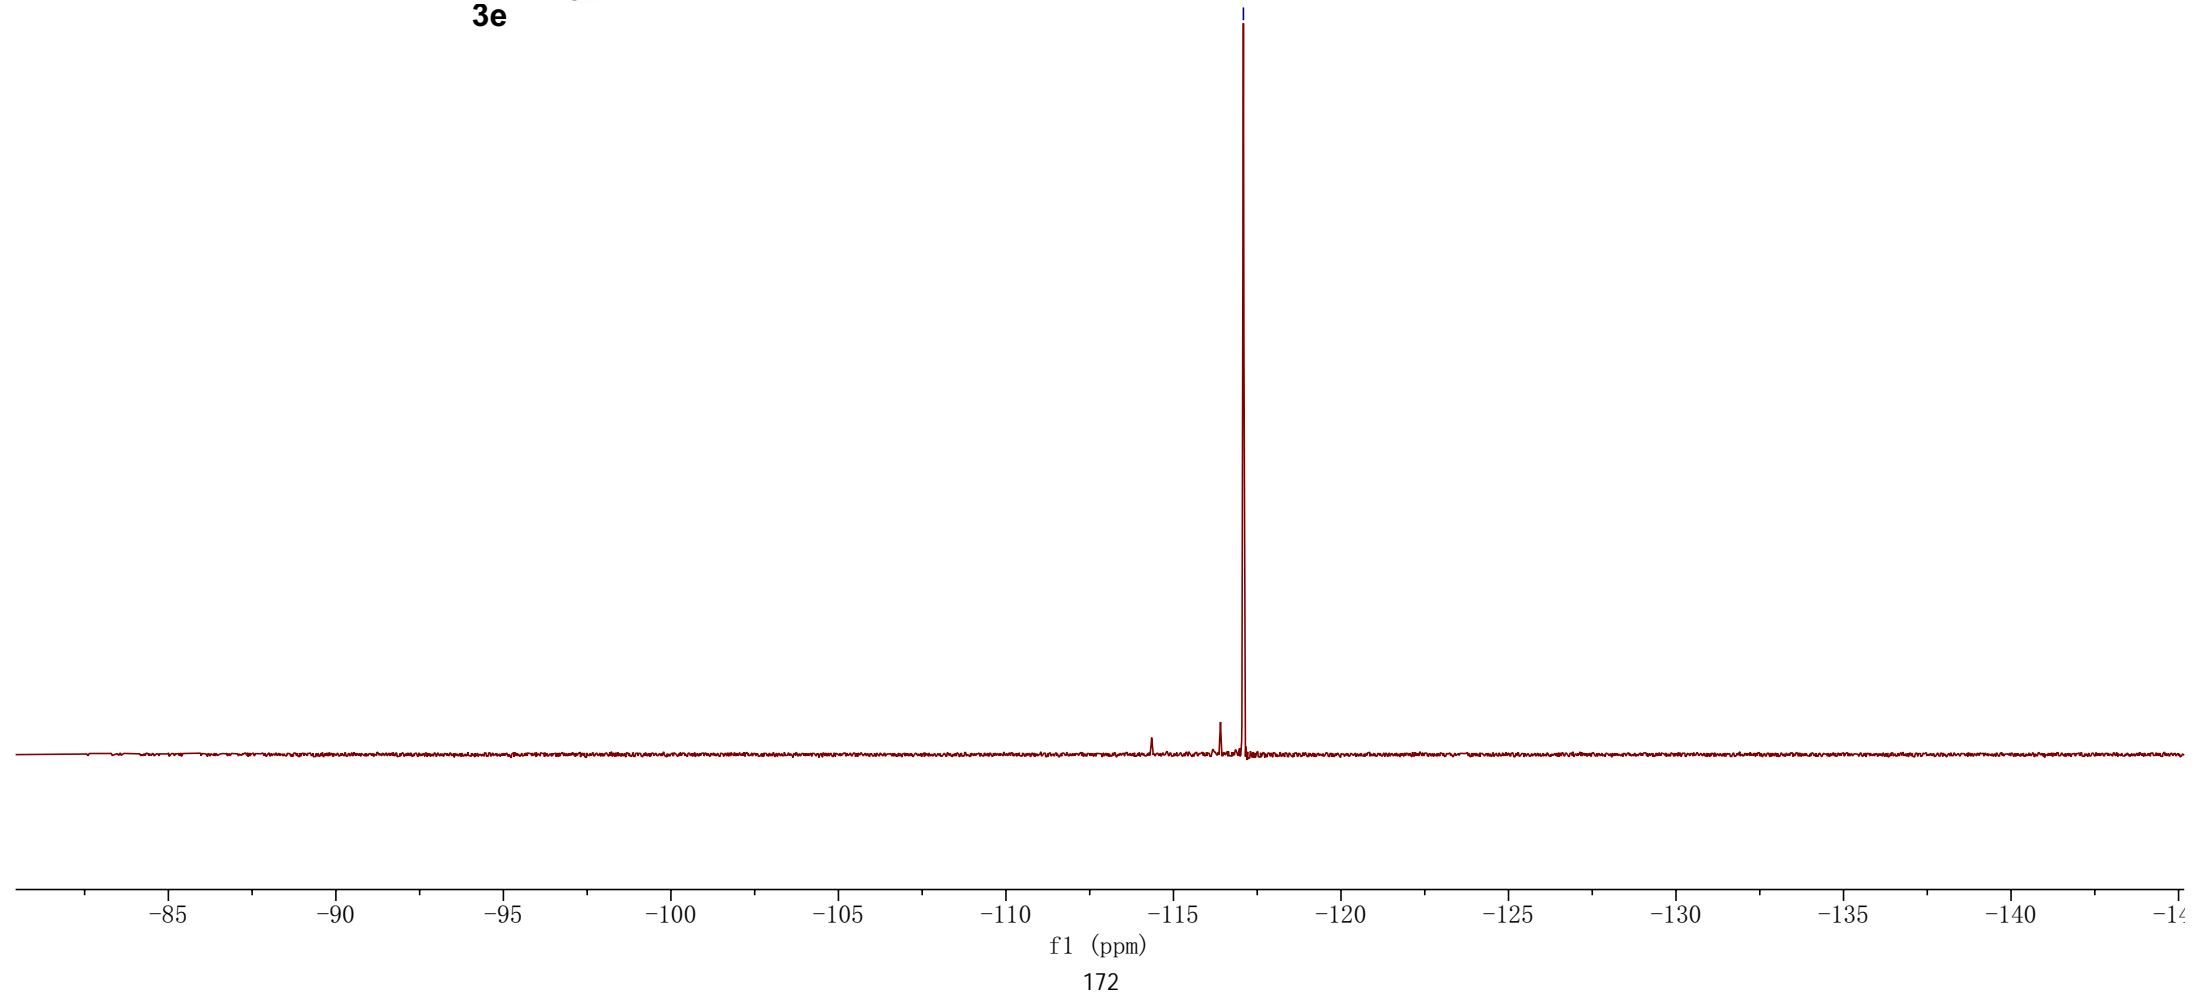

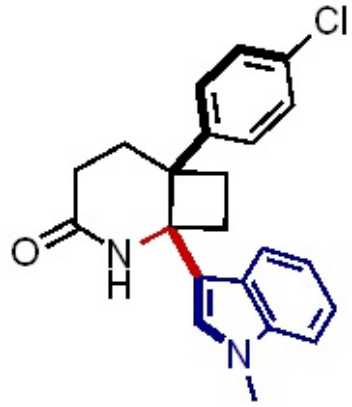

3f

7.68  
7.66

7.17  
7.10

7.09  
7.07  
7.07

7.06  
6.98  
6.96

6.92  
6.90  
6.68

6.48  
3.60

2.74  
2.73

2.72  
2.70

2.67  
2.65

2.64  
2.63

2.60  
2.59

2.57  
2.55

2.55  
2.53

2.53  
2.51

2.50  
2.39

2.37  
2.35

2.34  
2.33

2.33  
2.31

2.29  
2.20

2.18  
2.18

2.16

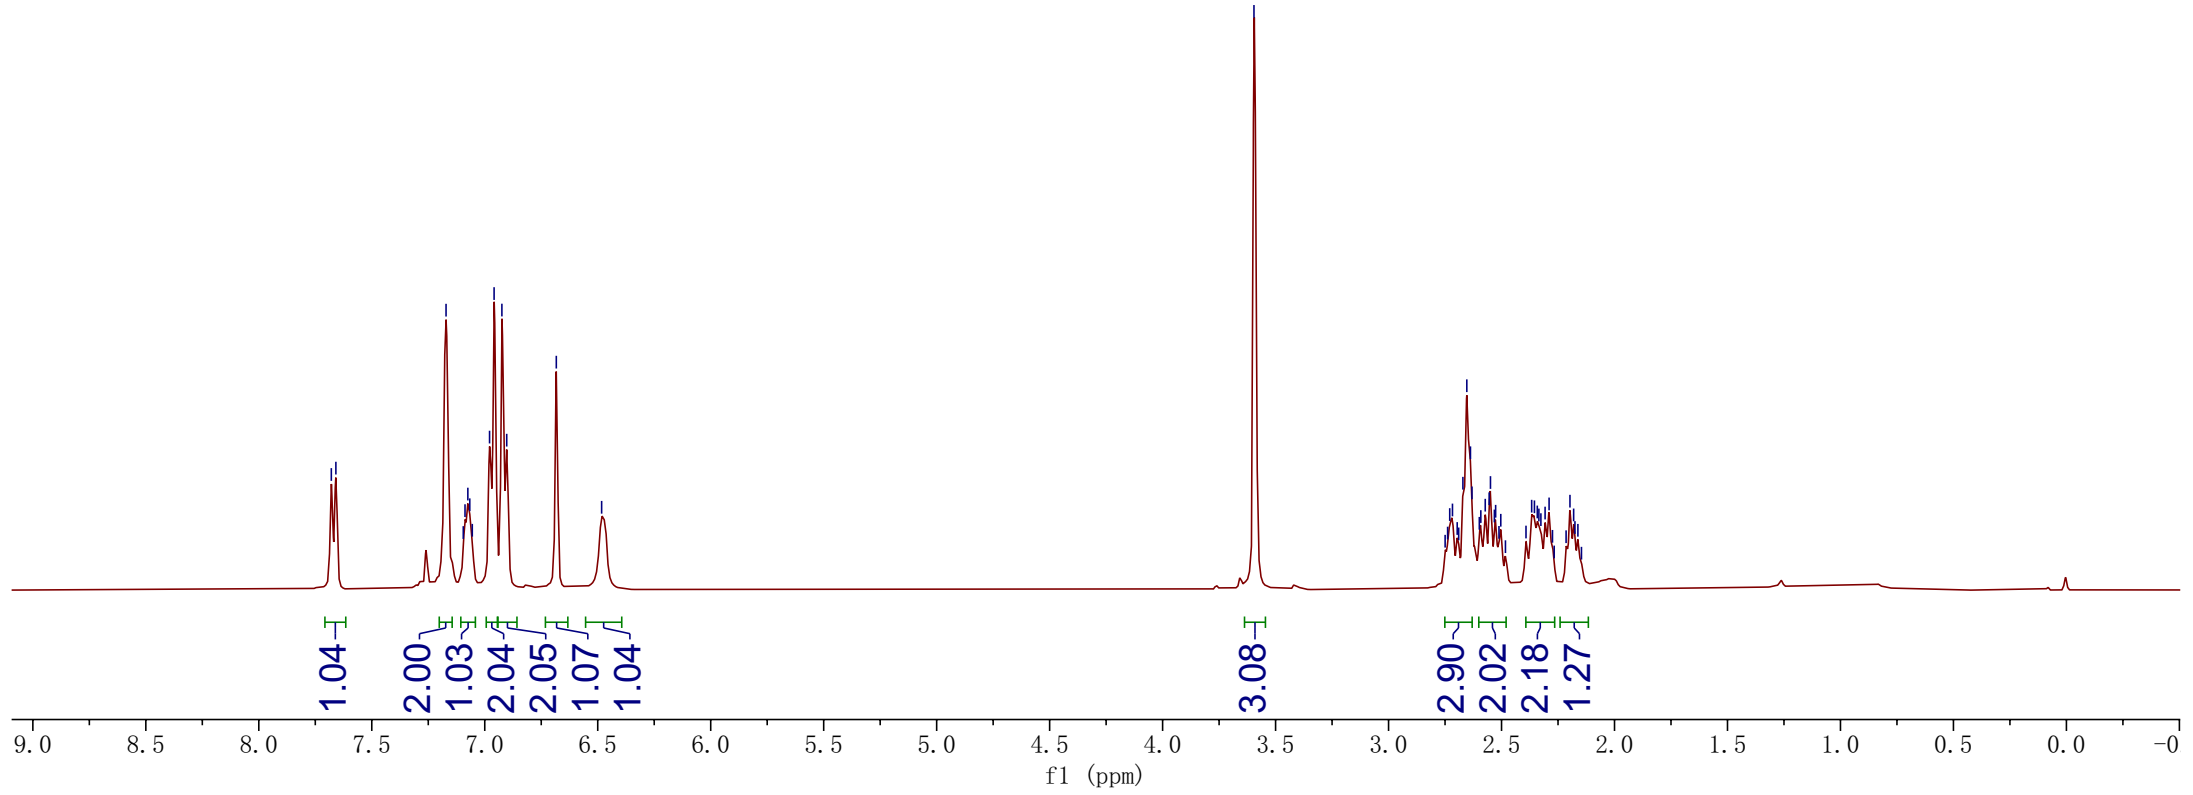

—172.83

143.44  
137.30  
131.67  
127.89  
127.60  
127.02  
126.23  
121.86  
120.50  
119.80  
115.99  
109.67

—62.60

—50.29

35.42  
34.87  
32.86  
28.99  
25.67

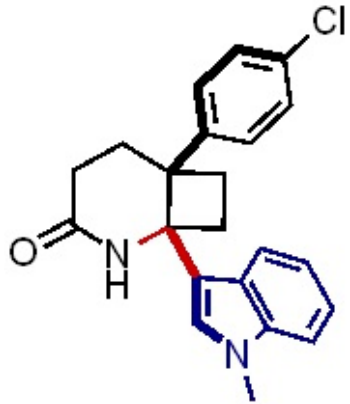

3f

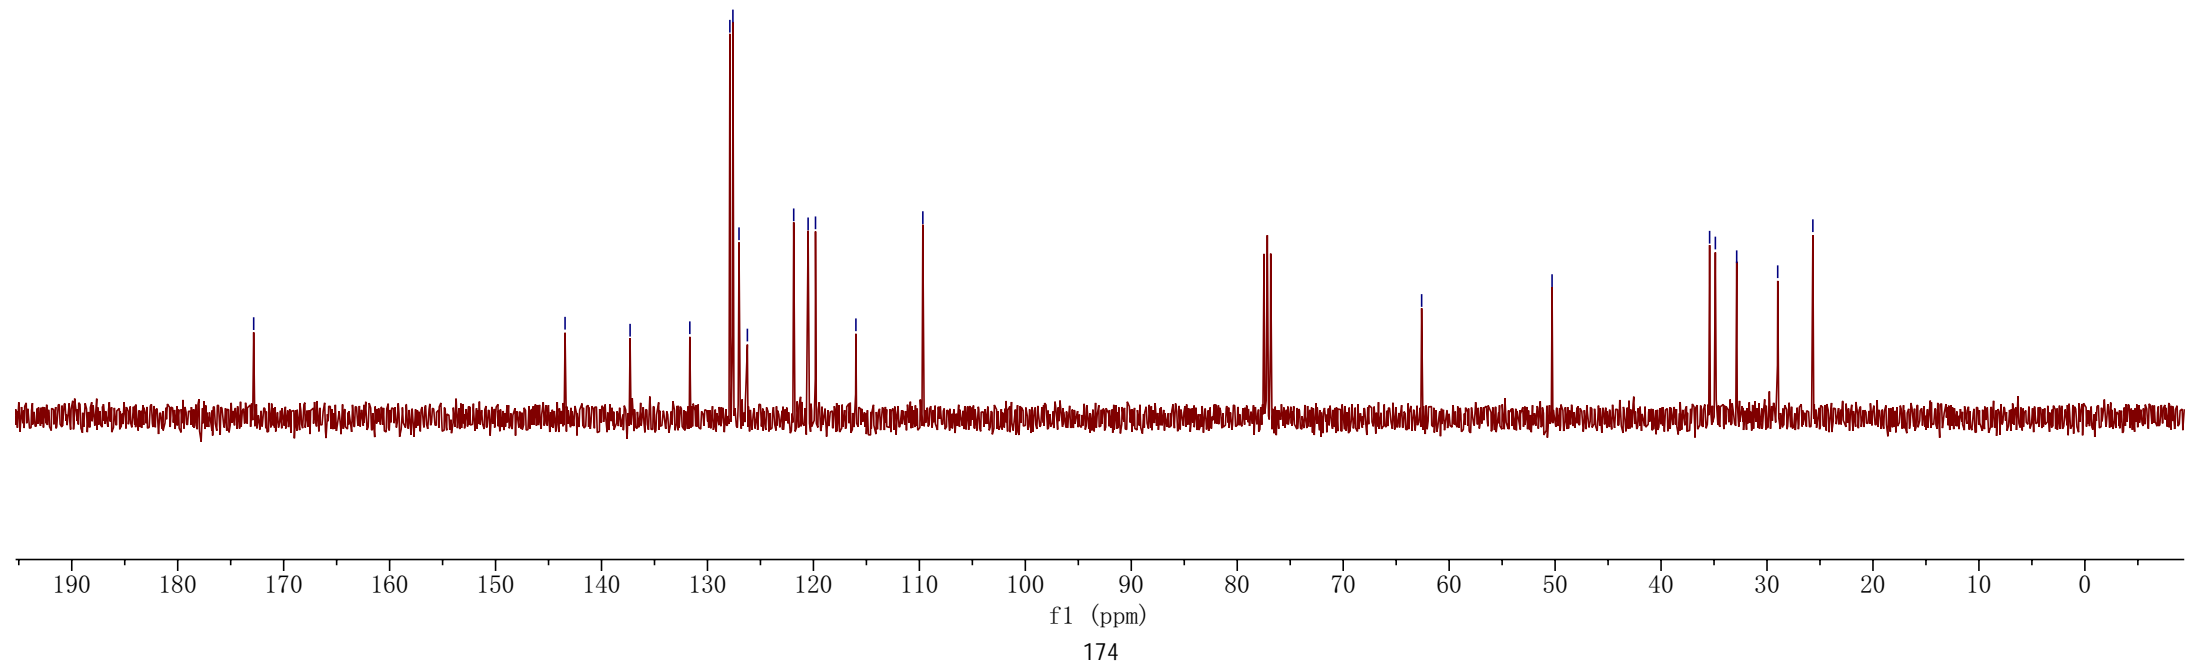

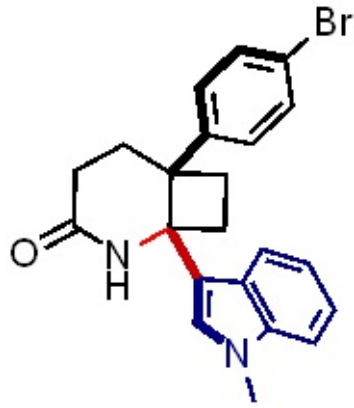

3g

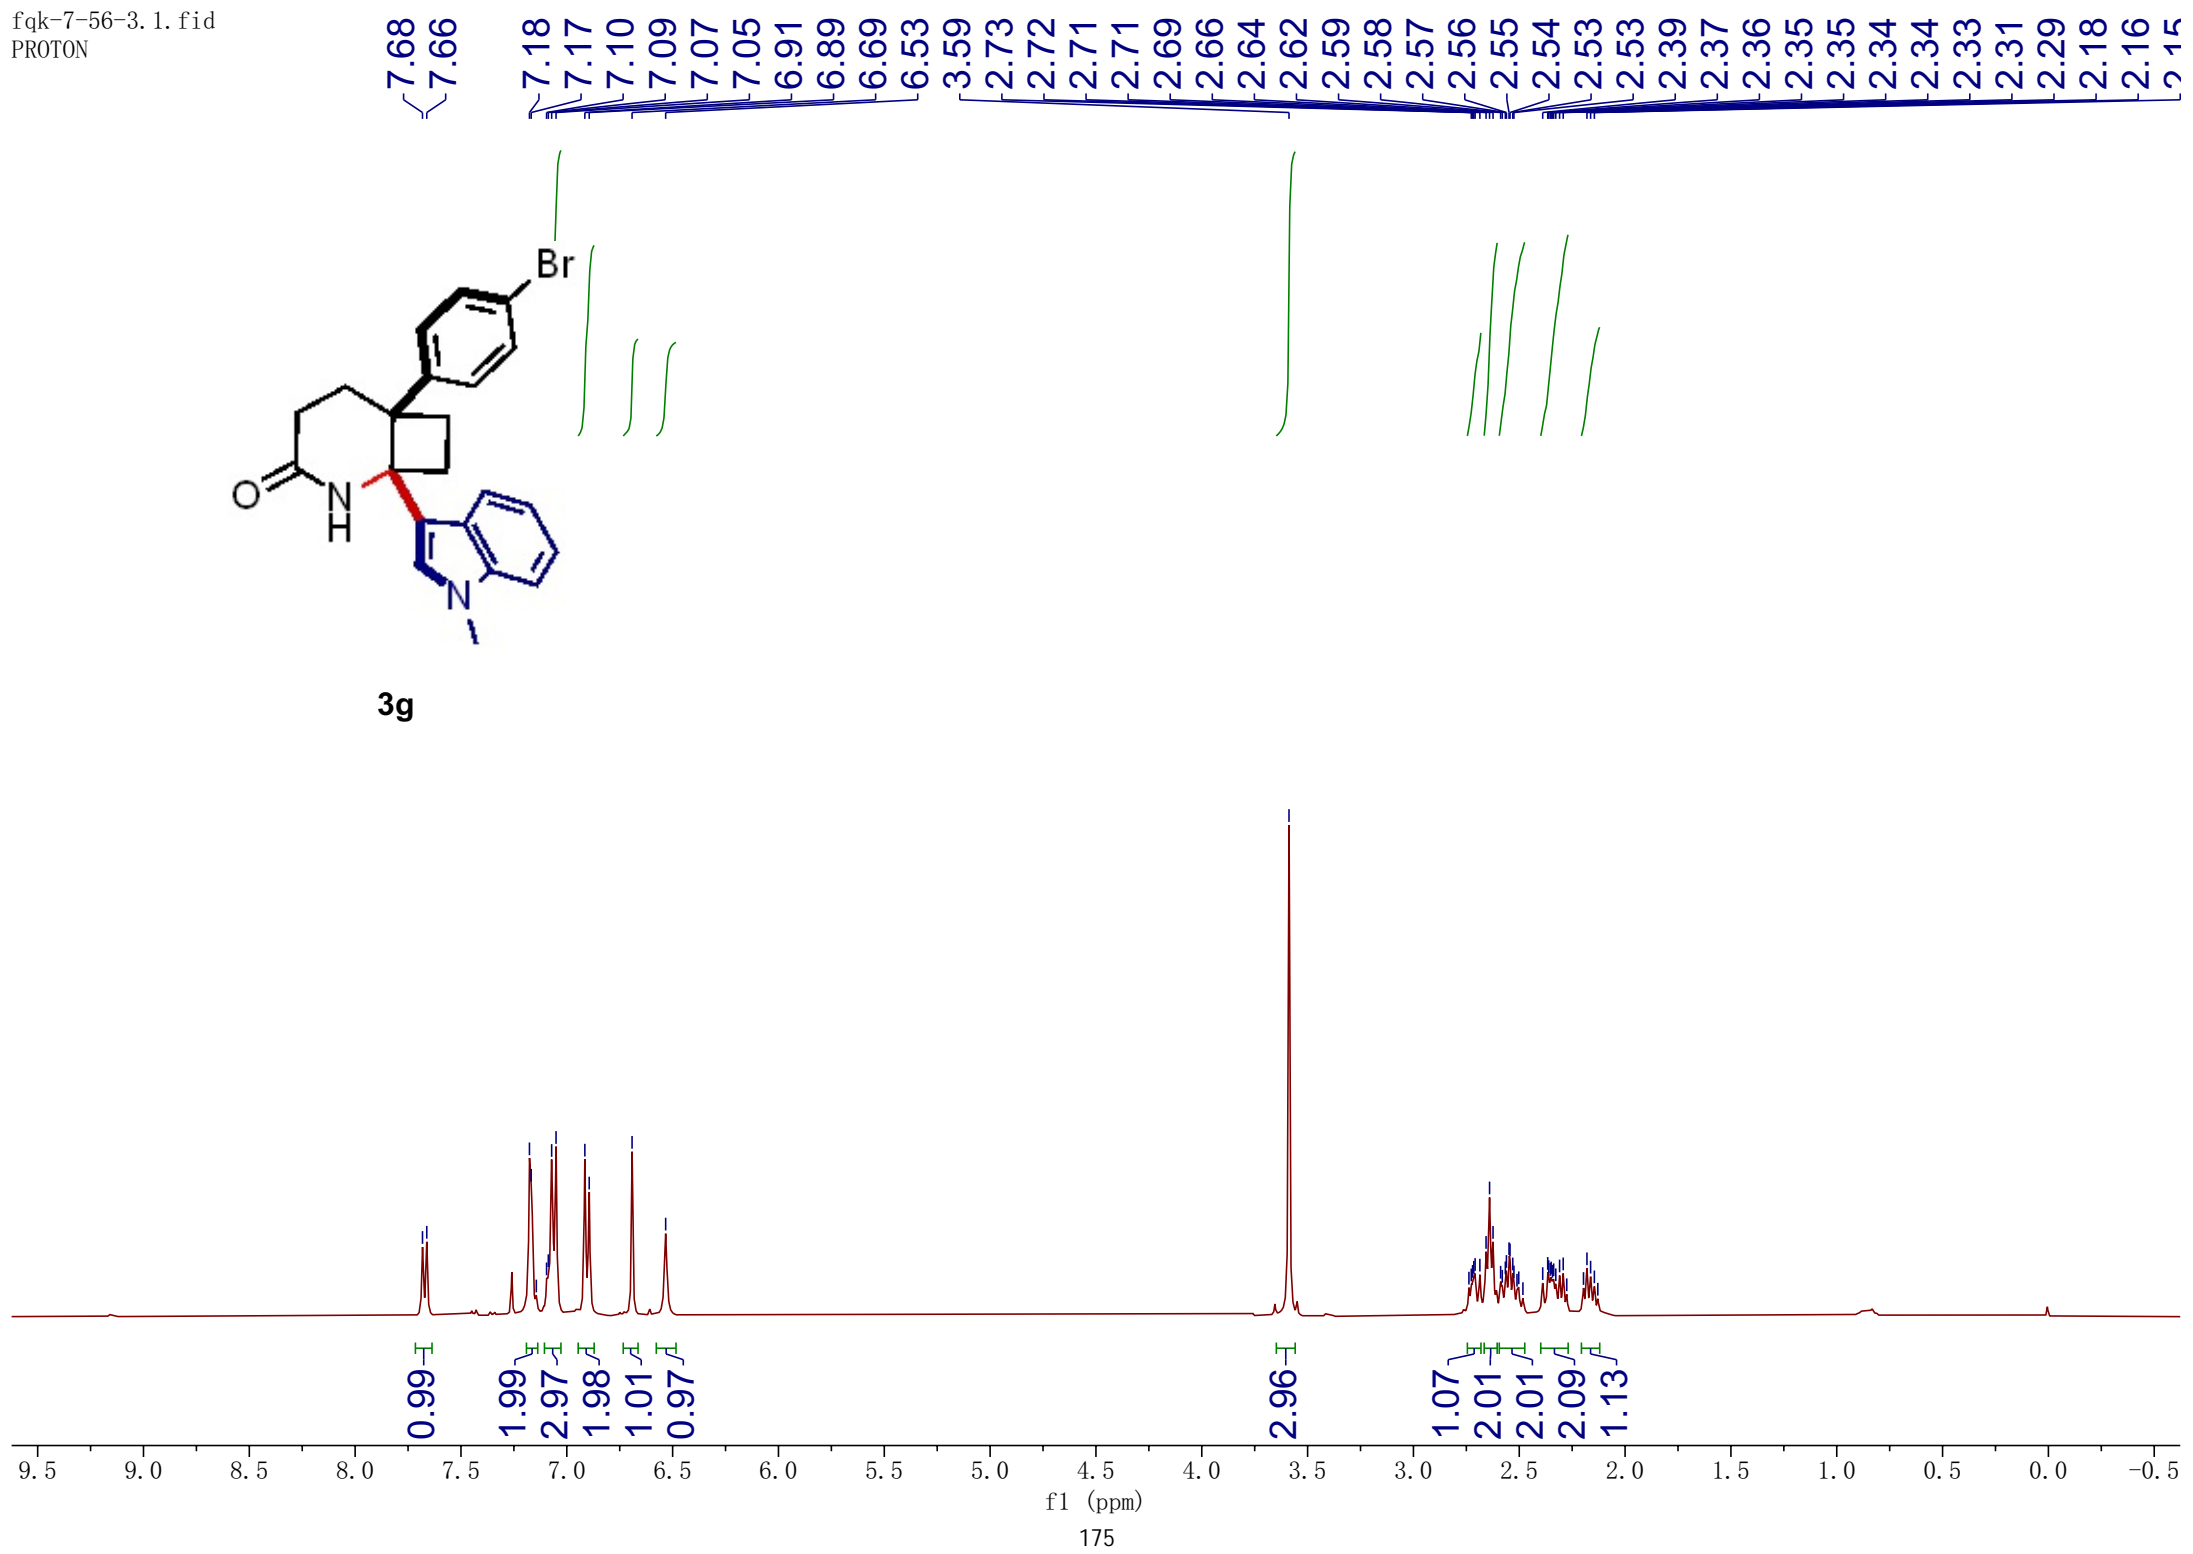

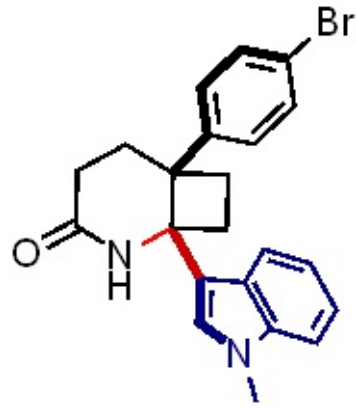

3g

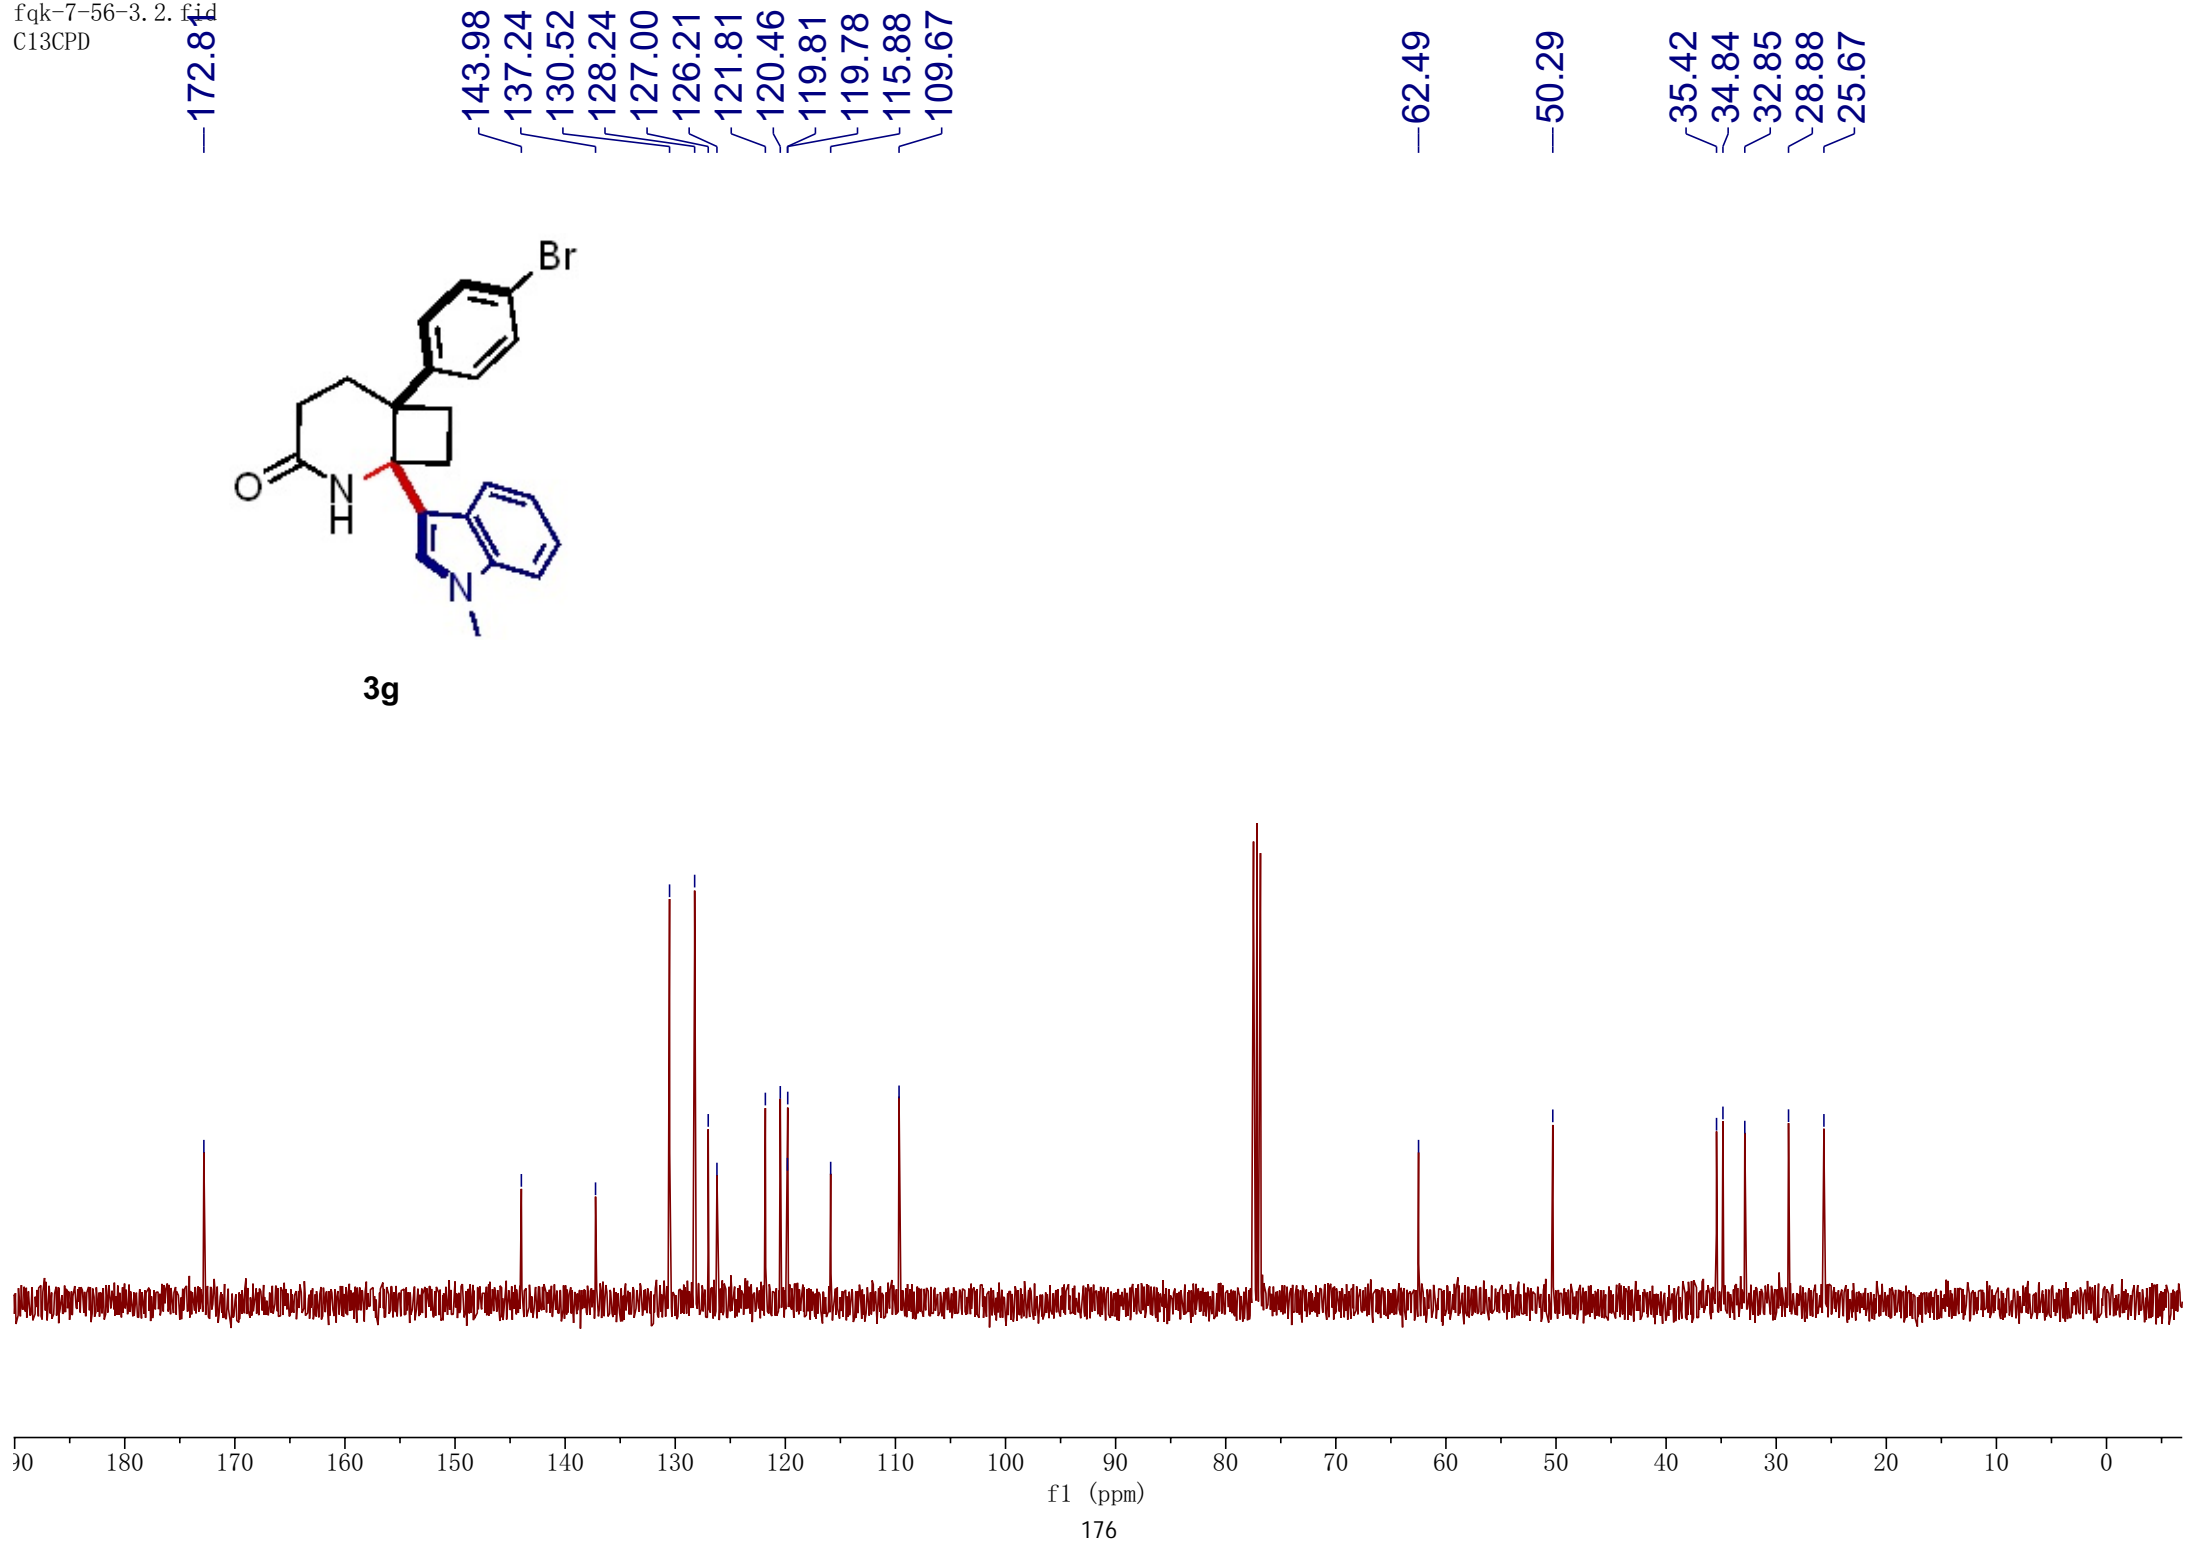

xgc\_1-89.fid  
111977  
0

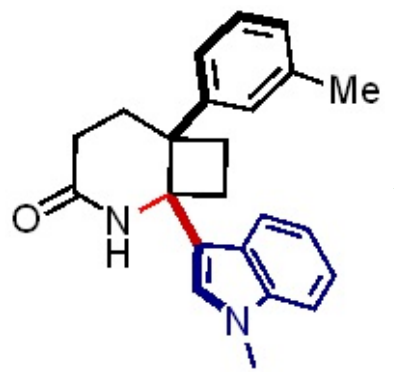

3h

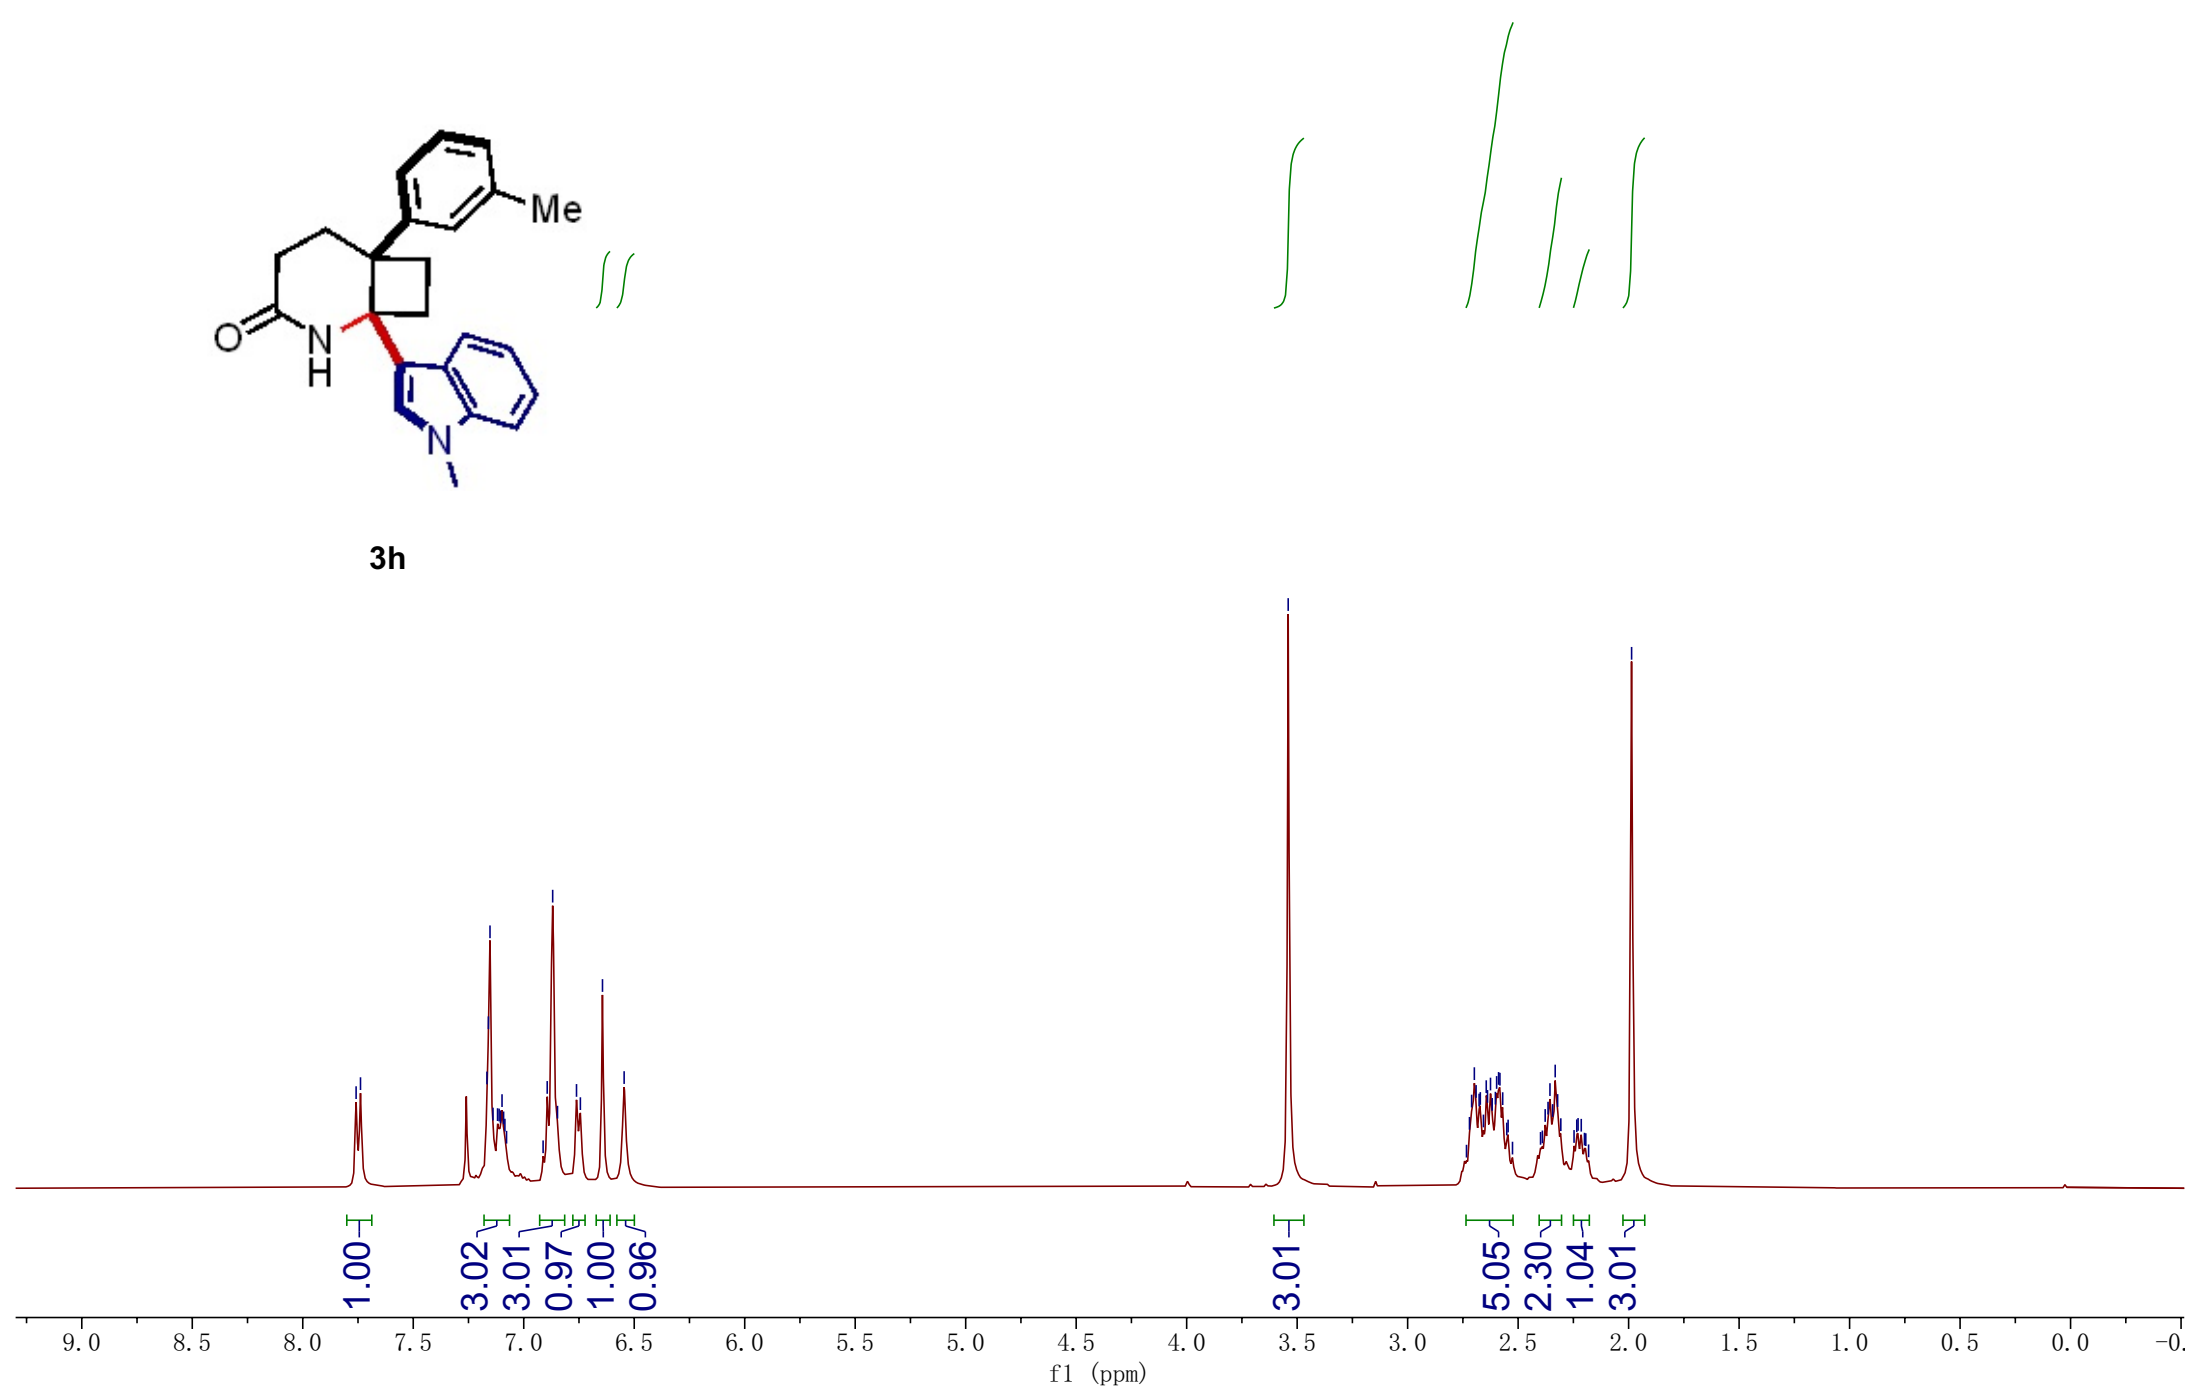

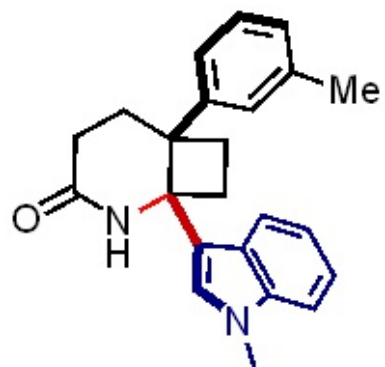

3h

—173.02

—144.81  
—137.10  
—136.80  
—127.43  
—127.27  
—126.95  
—126.53  
—126.49  
—123.27  
—121.58  
—120.71  
—119.48  
—116.16  
—109.39

—62.46

—50.37

—35.68  
—35.11  
—32.69  
—28.92  
—25.85  
—21.11

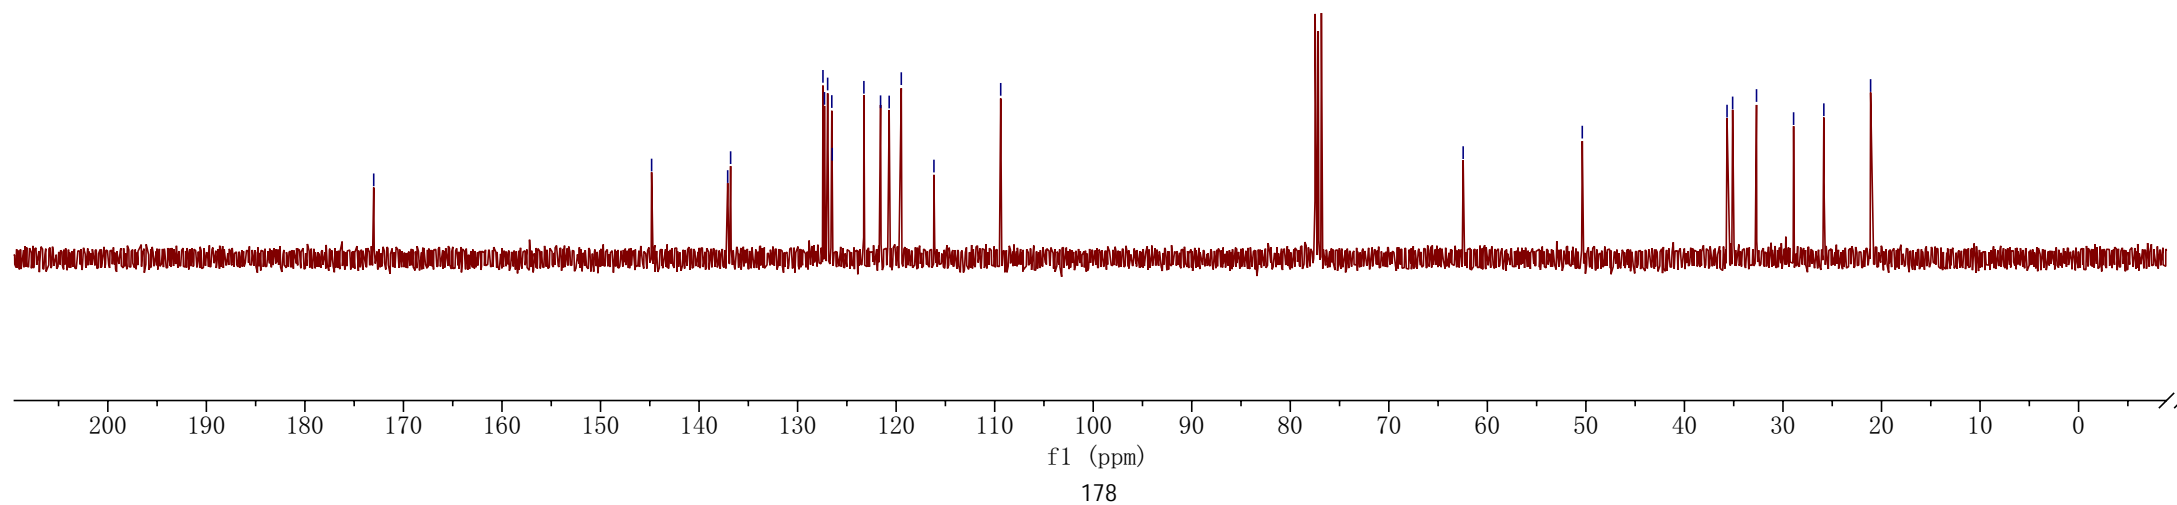

xg-1-139-1.f1d  
111  
0

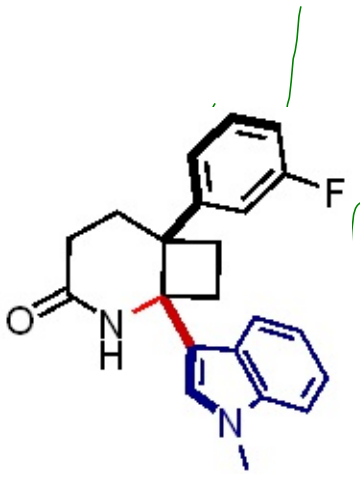

3i

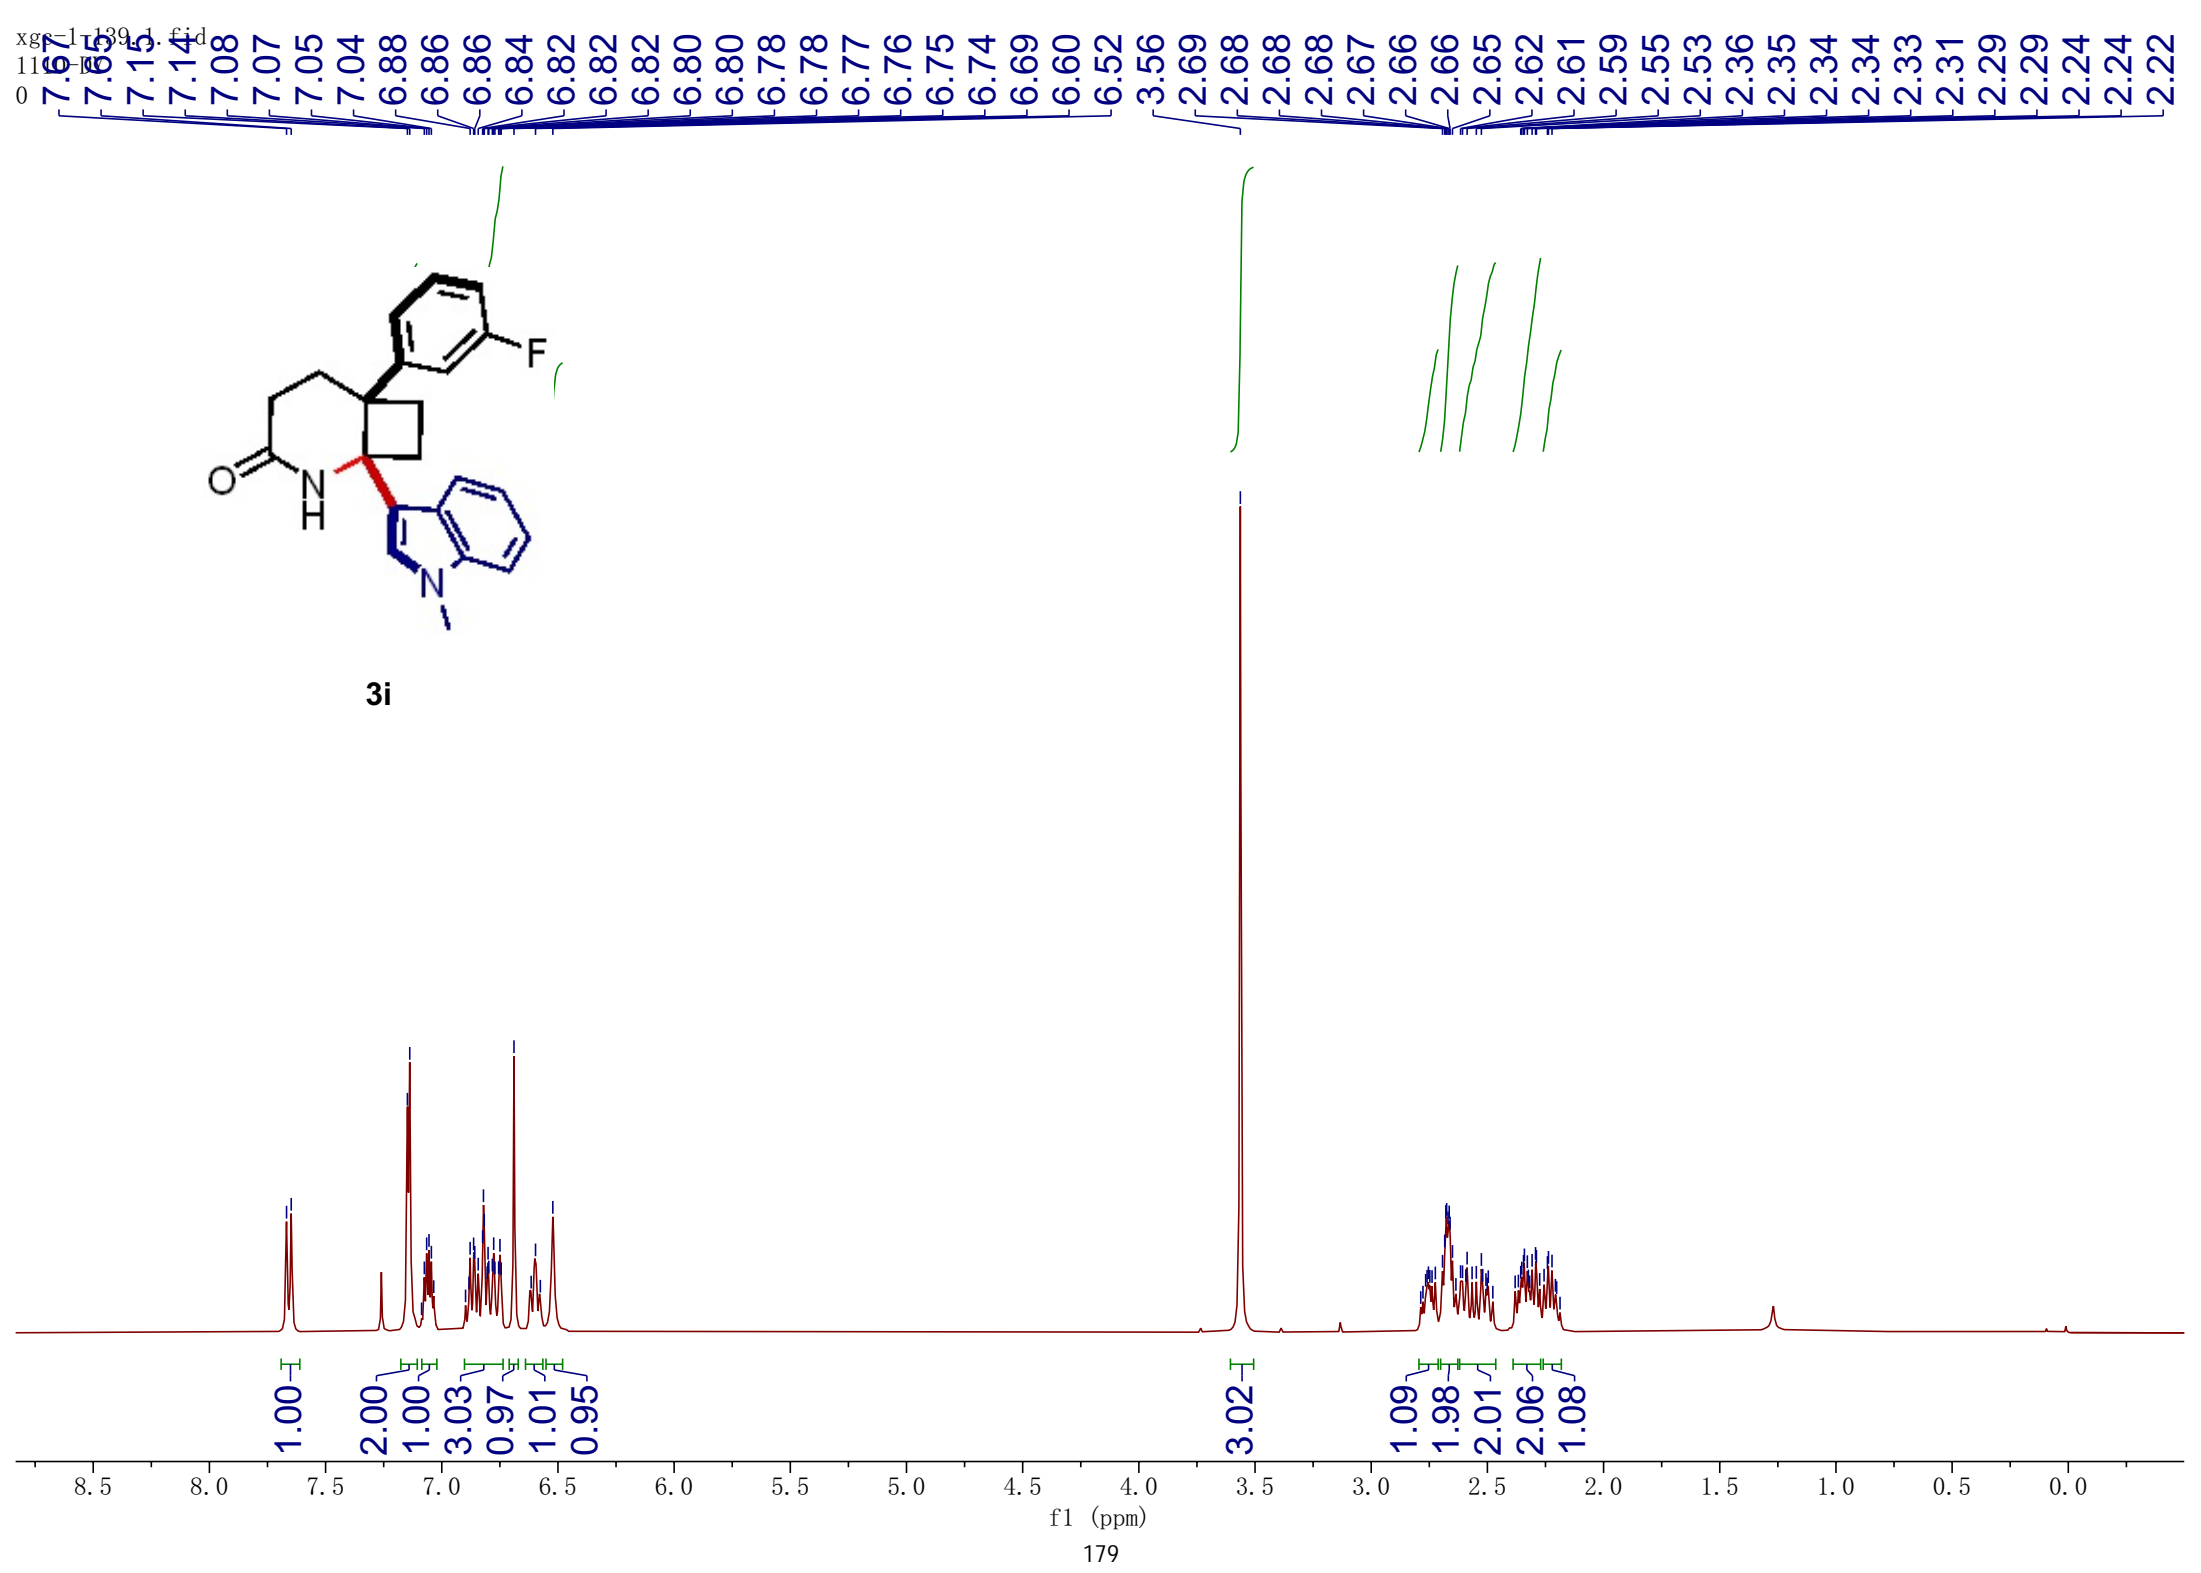

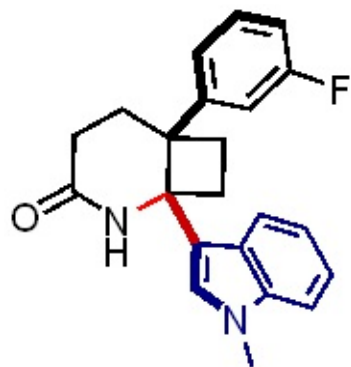

—172.78

~163.39

~160.96

{147.52

{147.45

—137.26

128.74

128.66

126.97

126.16

122.25

122.22

121.76

120.47

119.64

115.89

113.64

113.42

112.81

112.60

109.50

—62.56

—50.44

{35.25

{34.56

{32.72

{29.02

{25.63

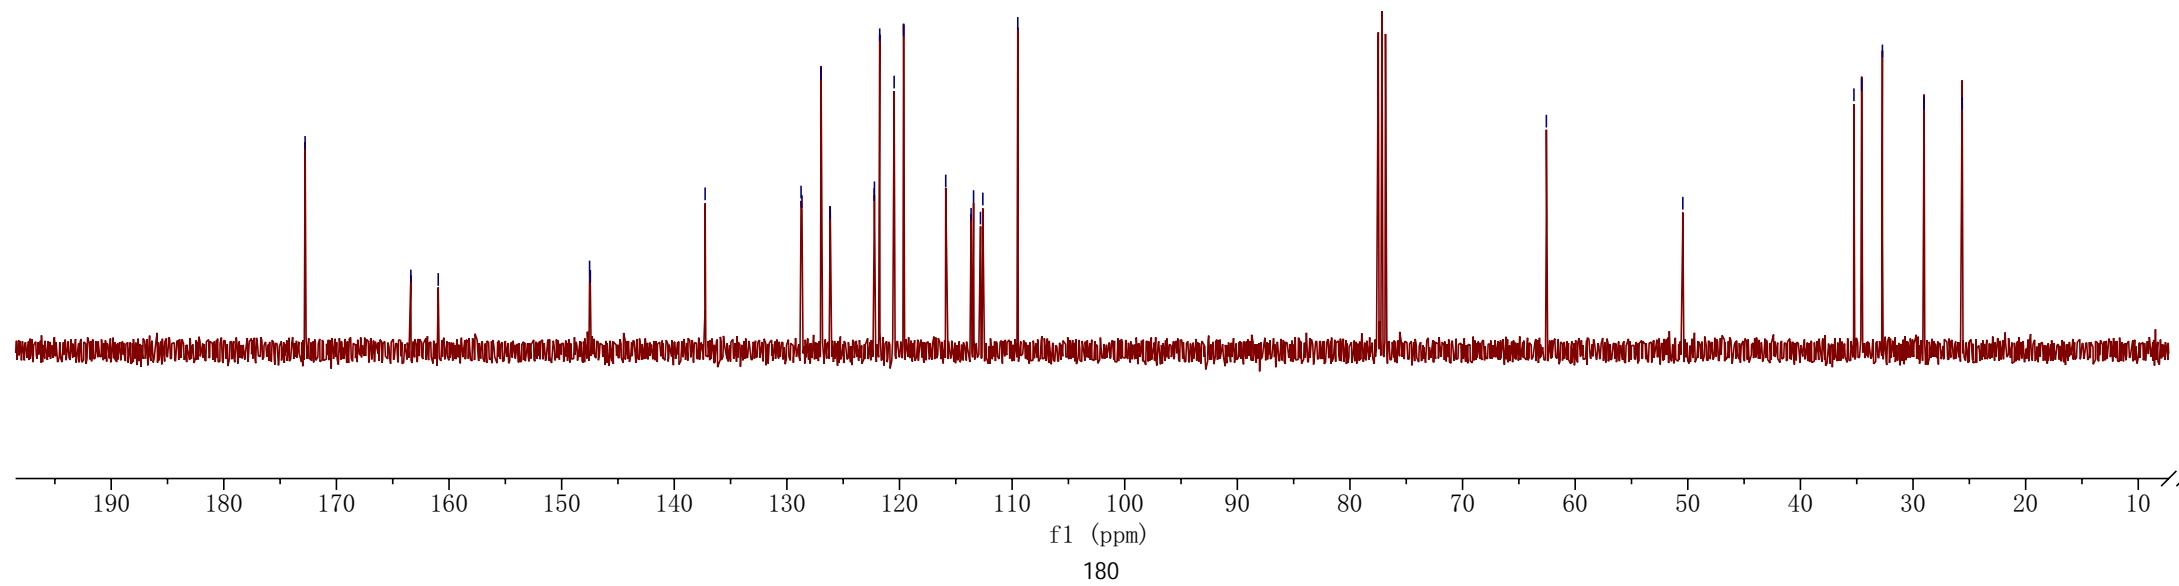

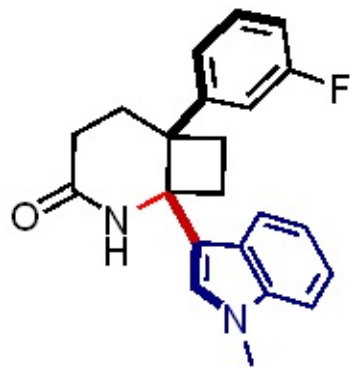

**3i**

--113.80

100

50

0

-50

-100

-150

-200

-250

-300

f1 (ppm)

181

xgc-1\_178\_1\_fid  
1110  
0

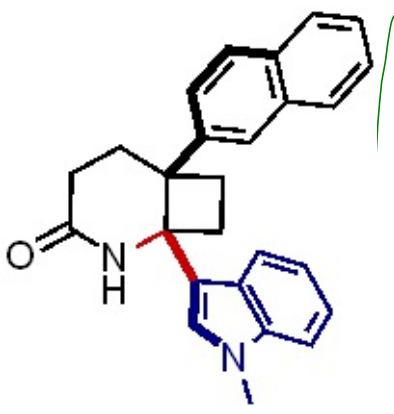

3j

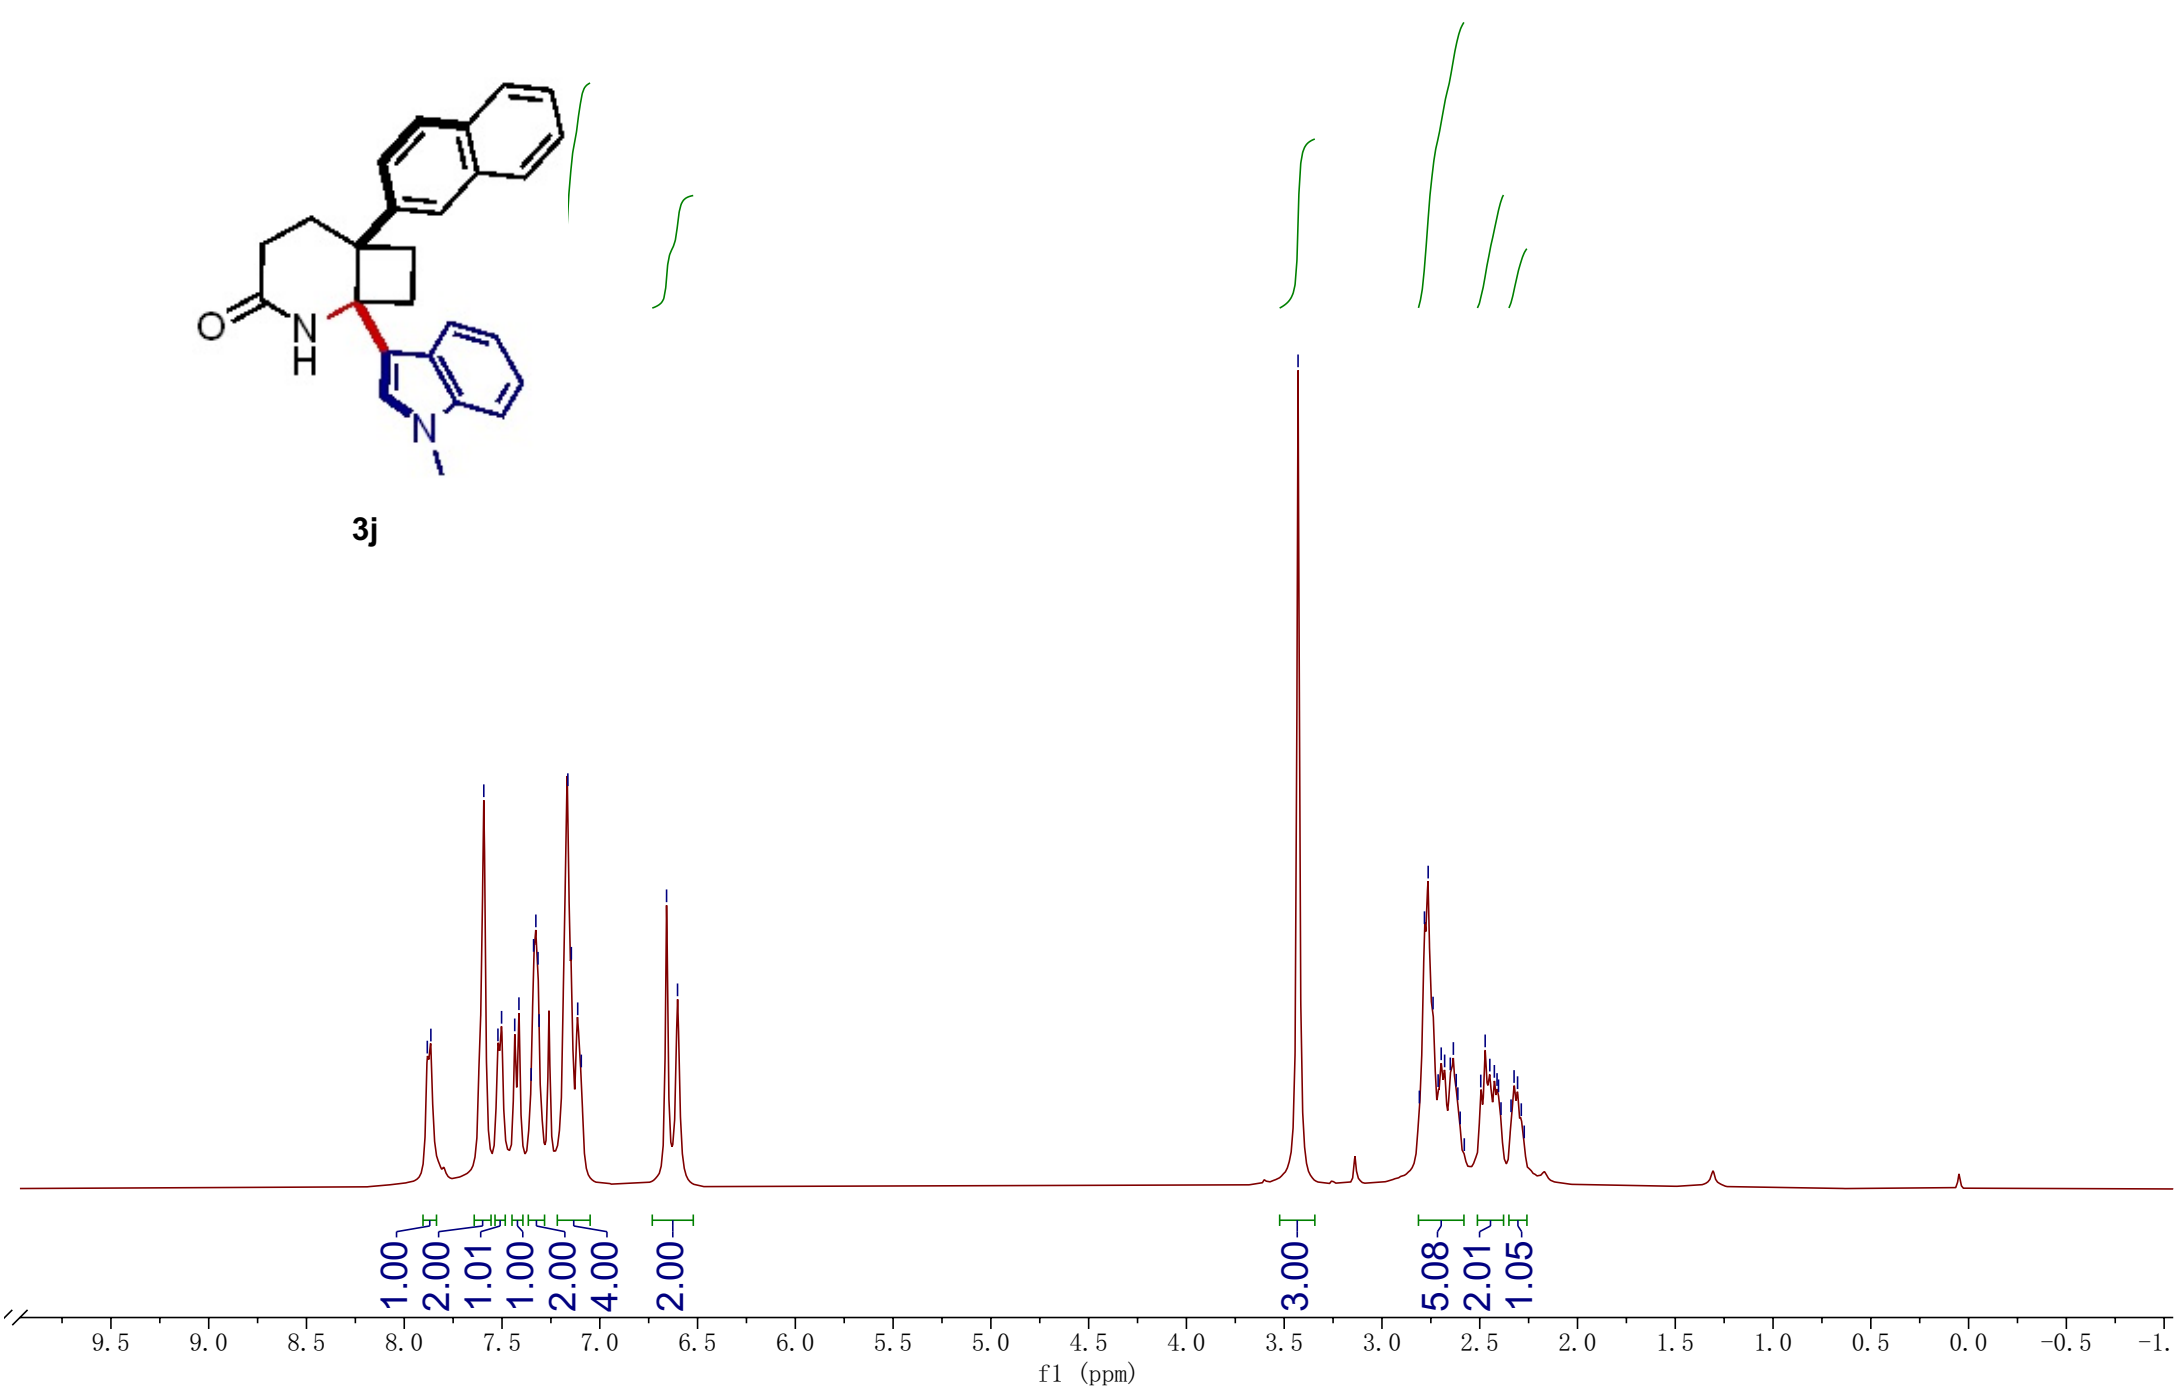

f1 (ppm)

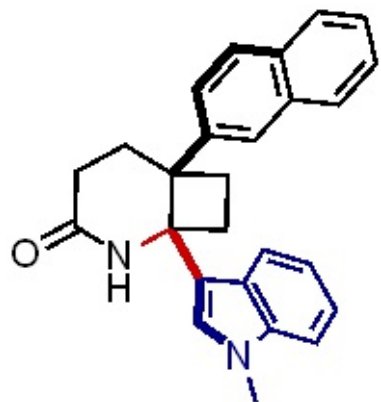

3j

172.96  
142.56  
137.13  
132.72  
131.70  
127.67  
127.23  
126.99  
126.95  
126.52  
125.71  
125.36  
125.31  
124.75  
121.69  
120.68  
119.68  
116.11  
109.55

62.54

50.81

35.82

35.26

32.63

29.00

25.92

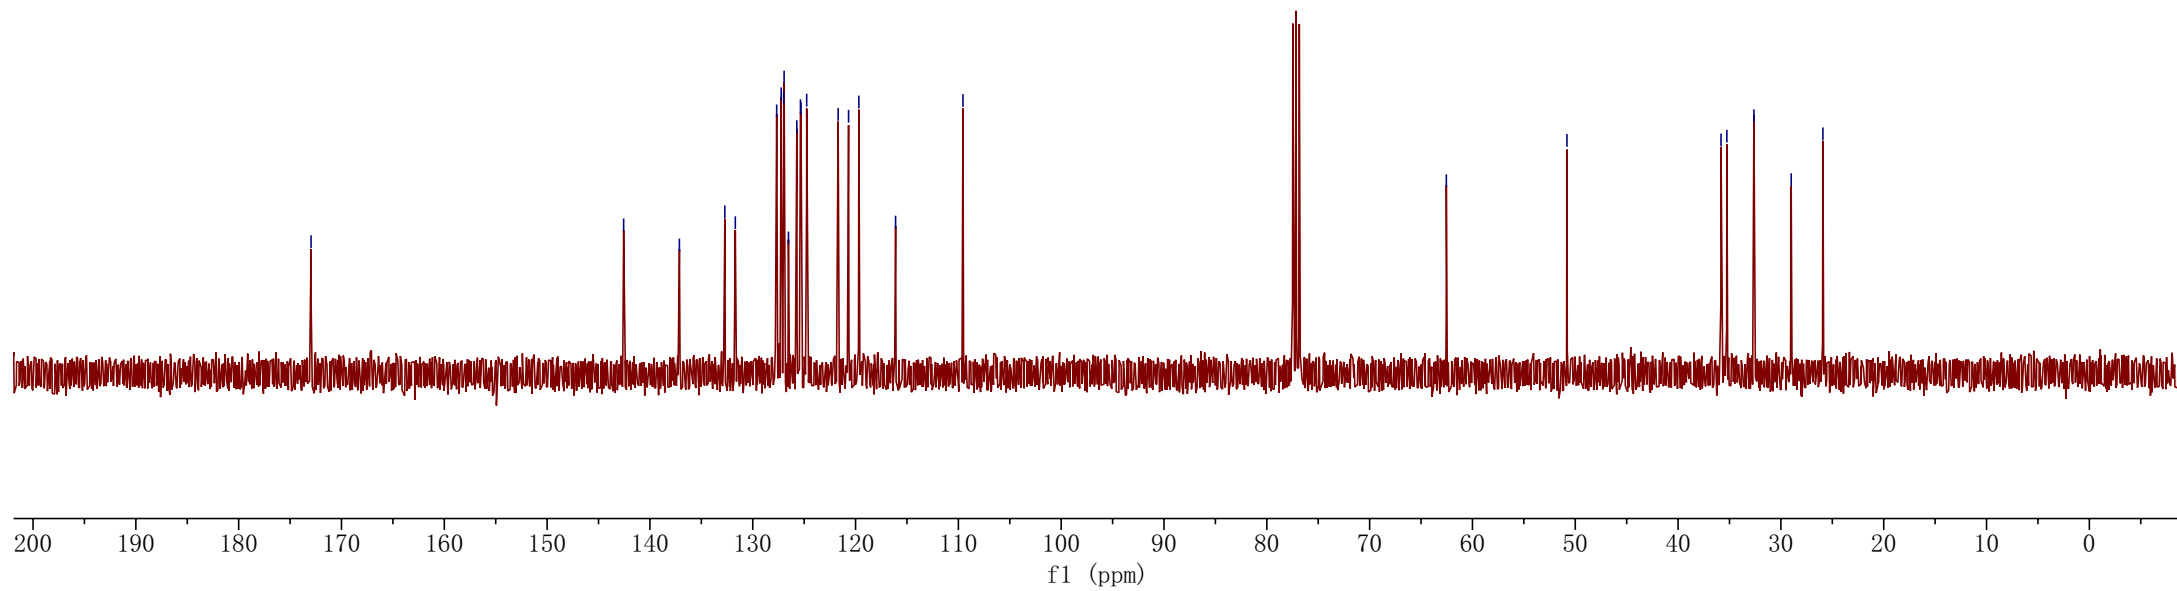

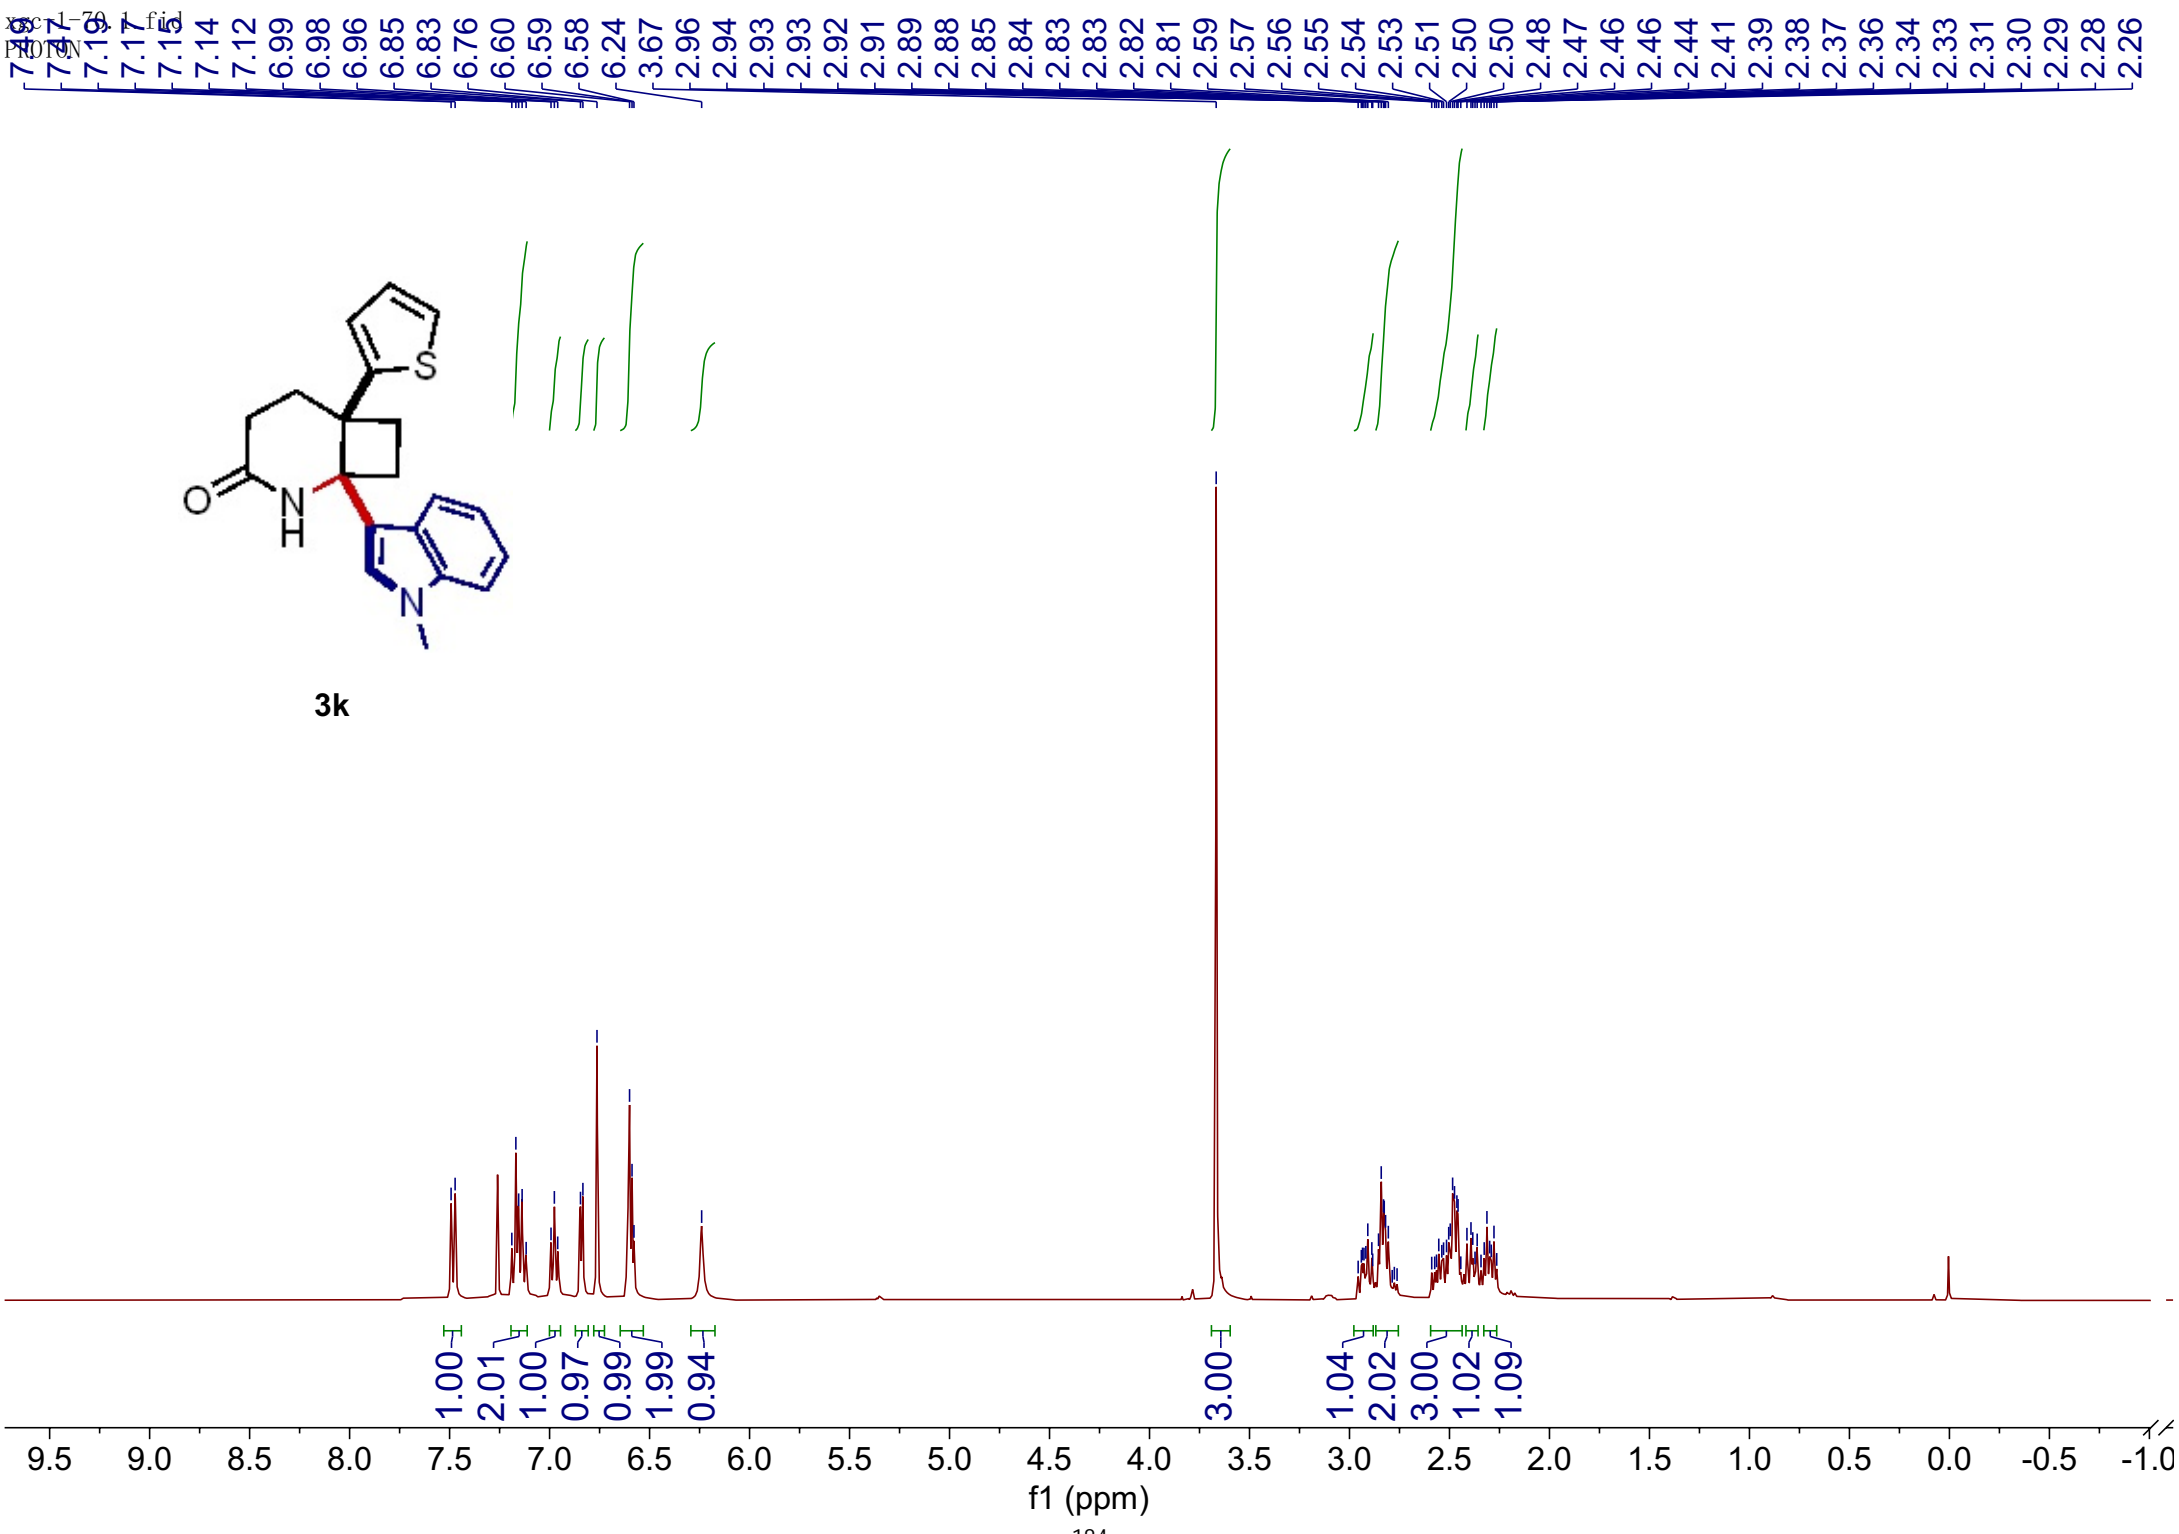

—172.48

—148.85

—137.63

127.74

126.27

125.96

124.30

123.66

121.82

120.88

119.40

115.38

109.31

—63.77

—48.33

33.56

32.89

32.70

29.71

27.60

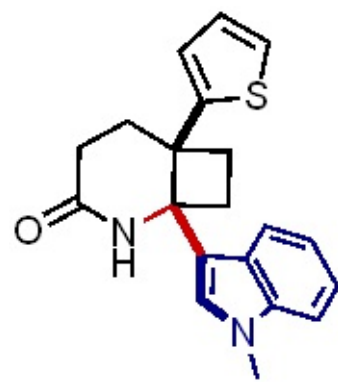

3k

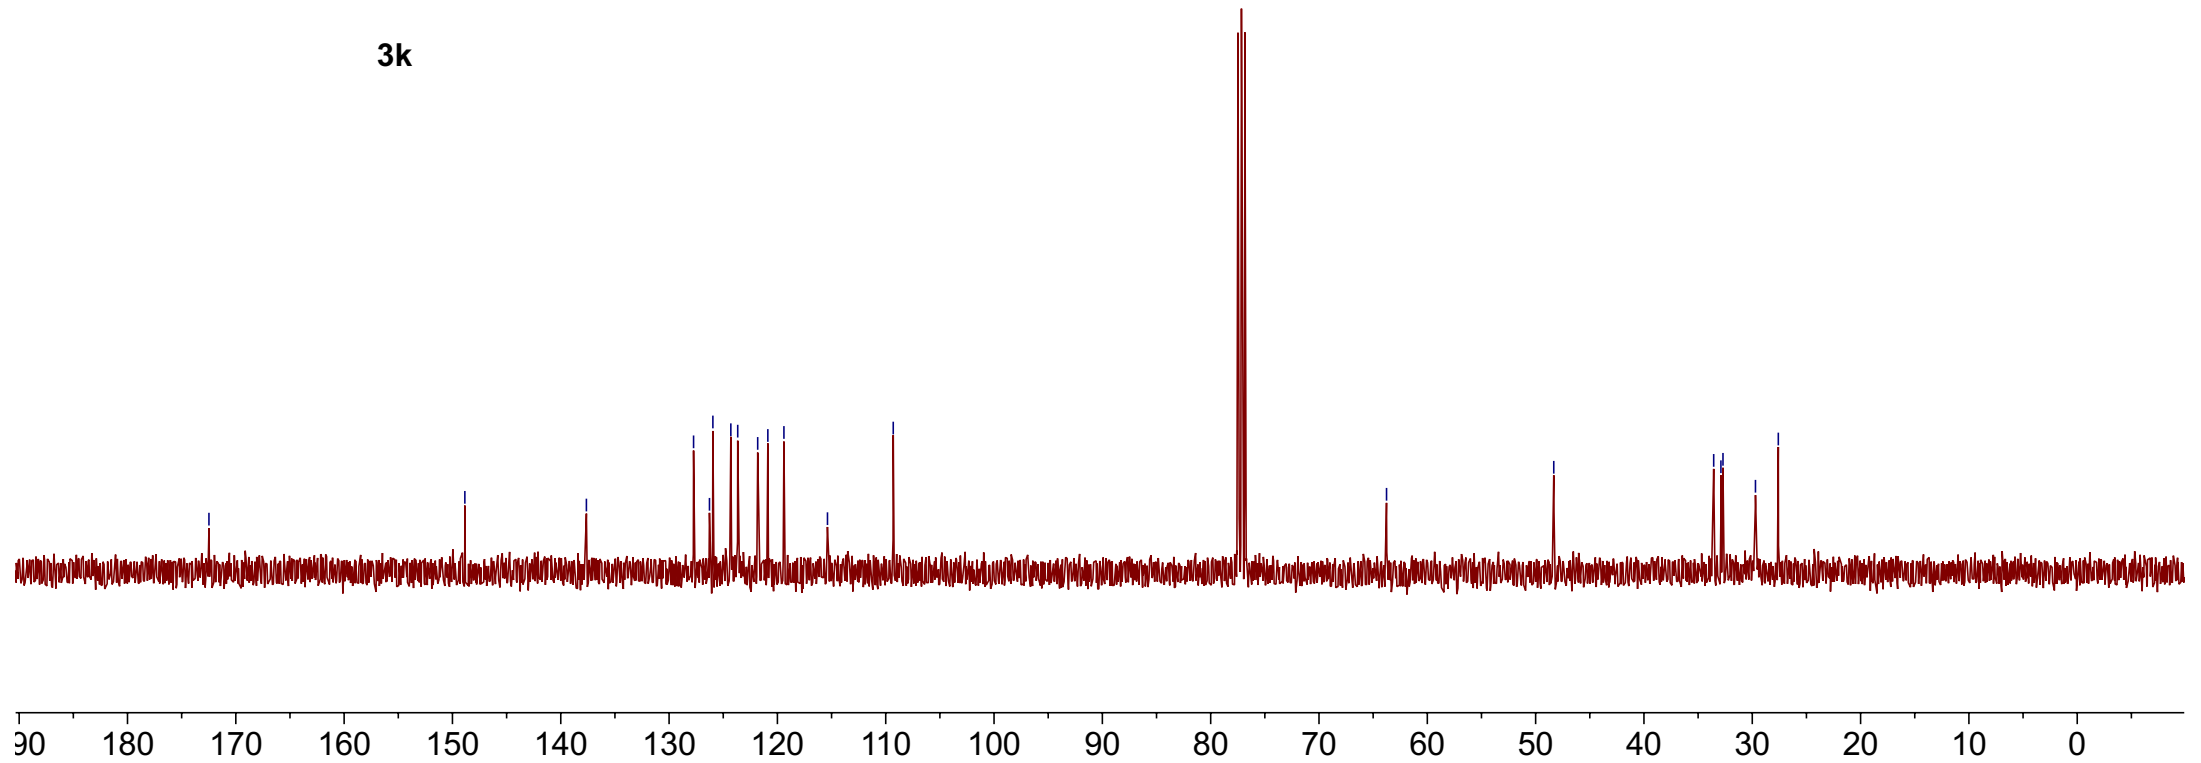

f1 (ppm)

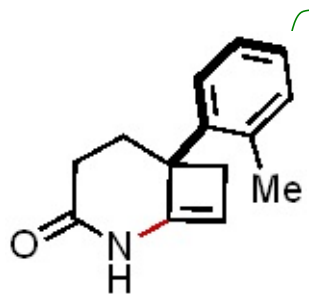

31

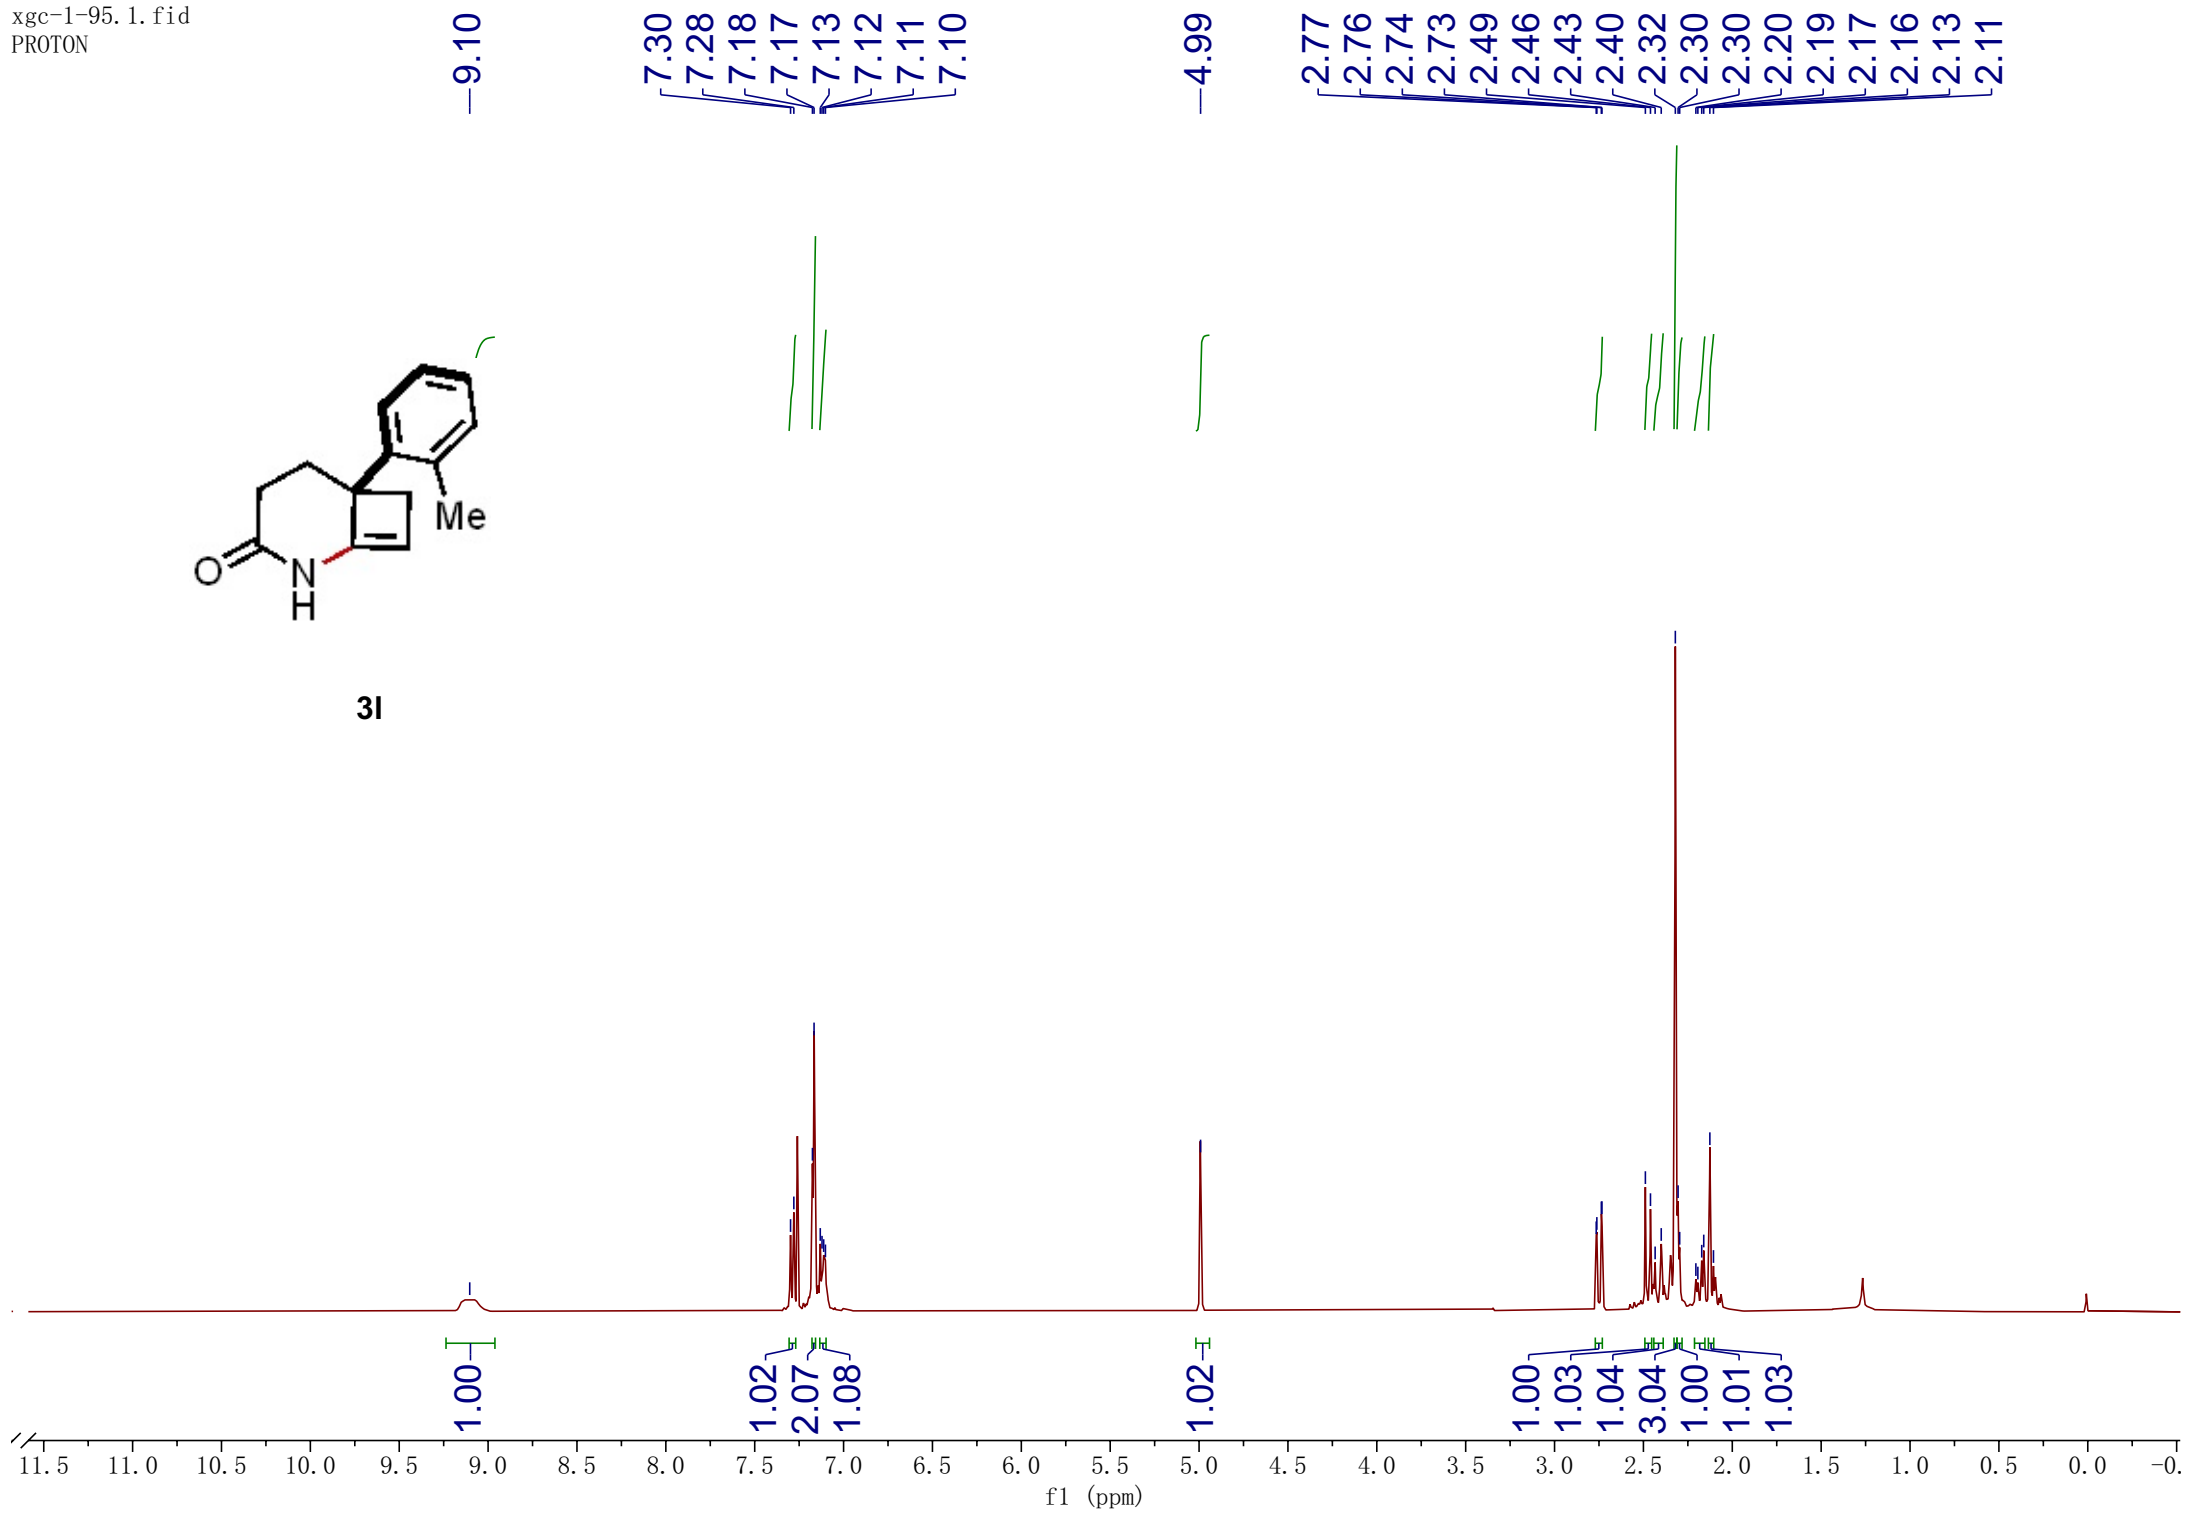

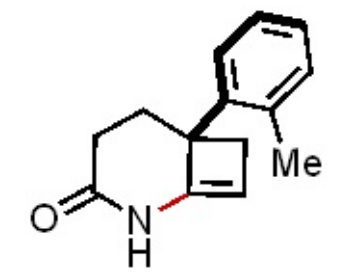

3I

-172.13  
141.16  
140.84  
135.51  
131.26  
126.94  
126.85  
125.64

-101.77

-48.79

-40.62

30.61  
30.29

-19.41

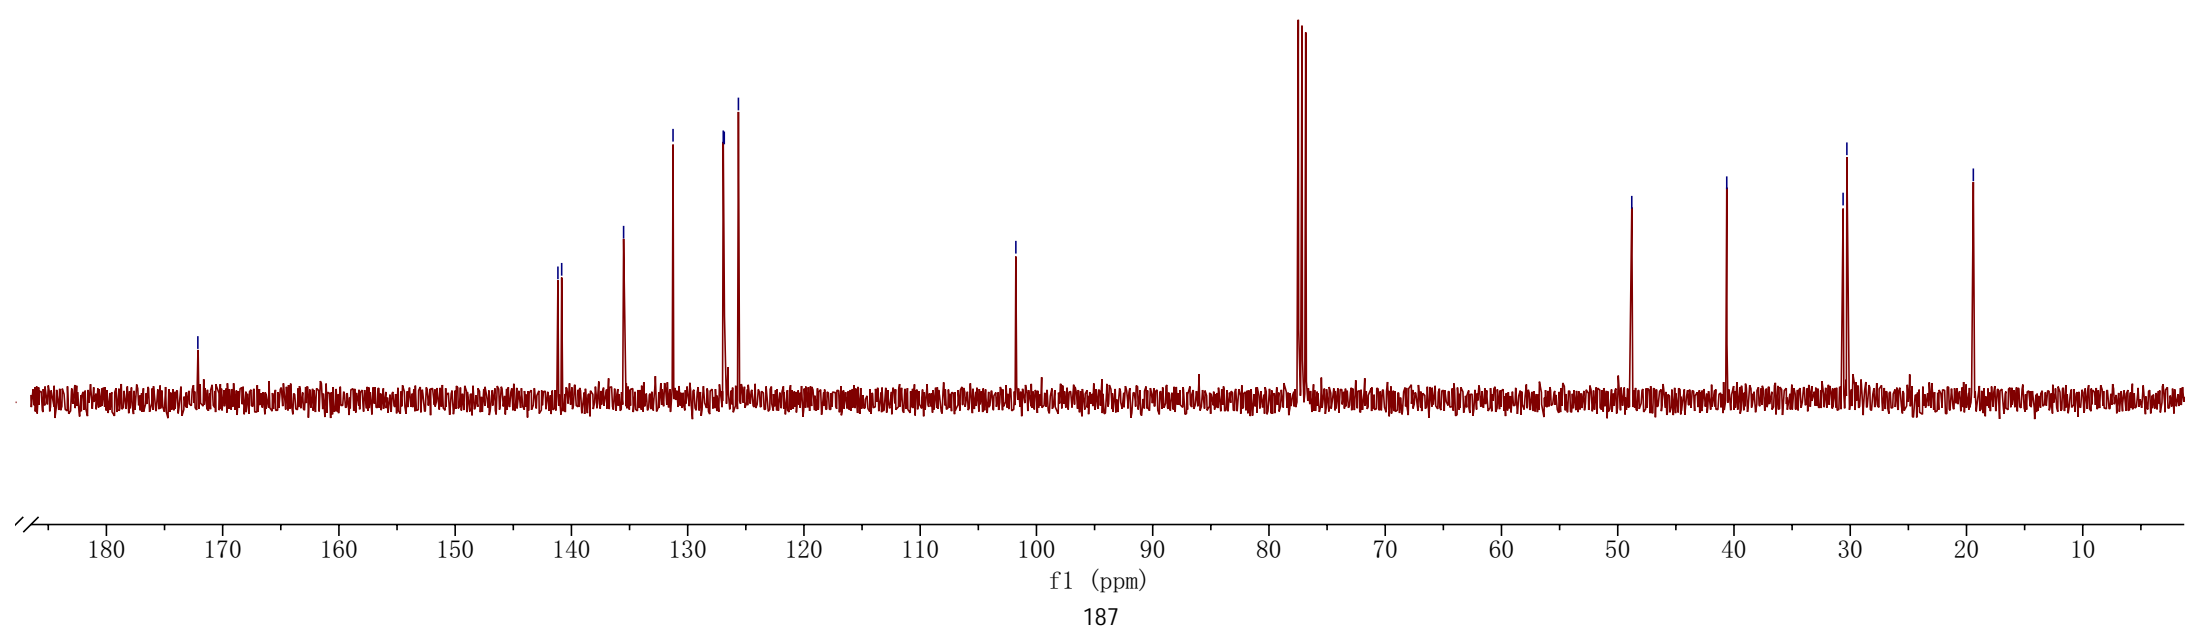

8.56  
8.35  
8.33  
7.86  
7.84  
7.55  
7.53  
7.51  
7.49  
7.47  
7.39  
7.37  
6.71  
6.69

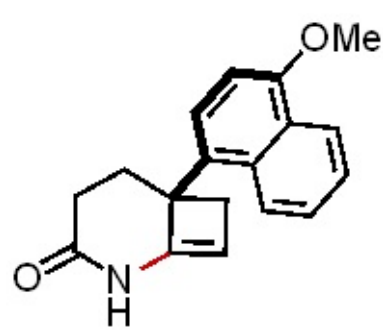

3m

-5.05

-3.98

2.96  
2.93  
2.64  
2.64  
2.61  
2.60  
2.59  
2.45  
2.44  
2.41  
2.40  
2.39  
2.32  
2.29  
2.28  
2.26  
2.25  
2.21  
2.20  
0.16

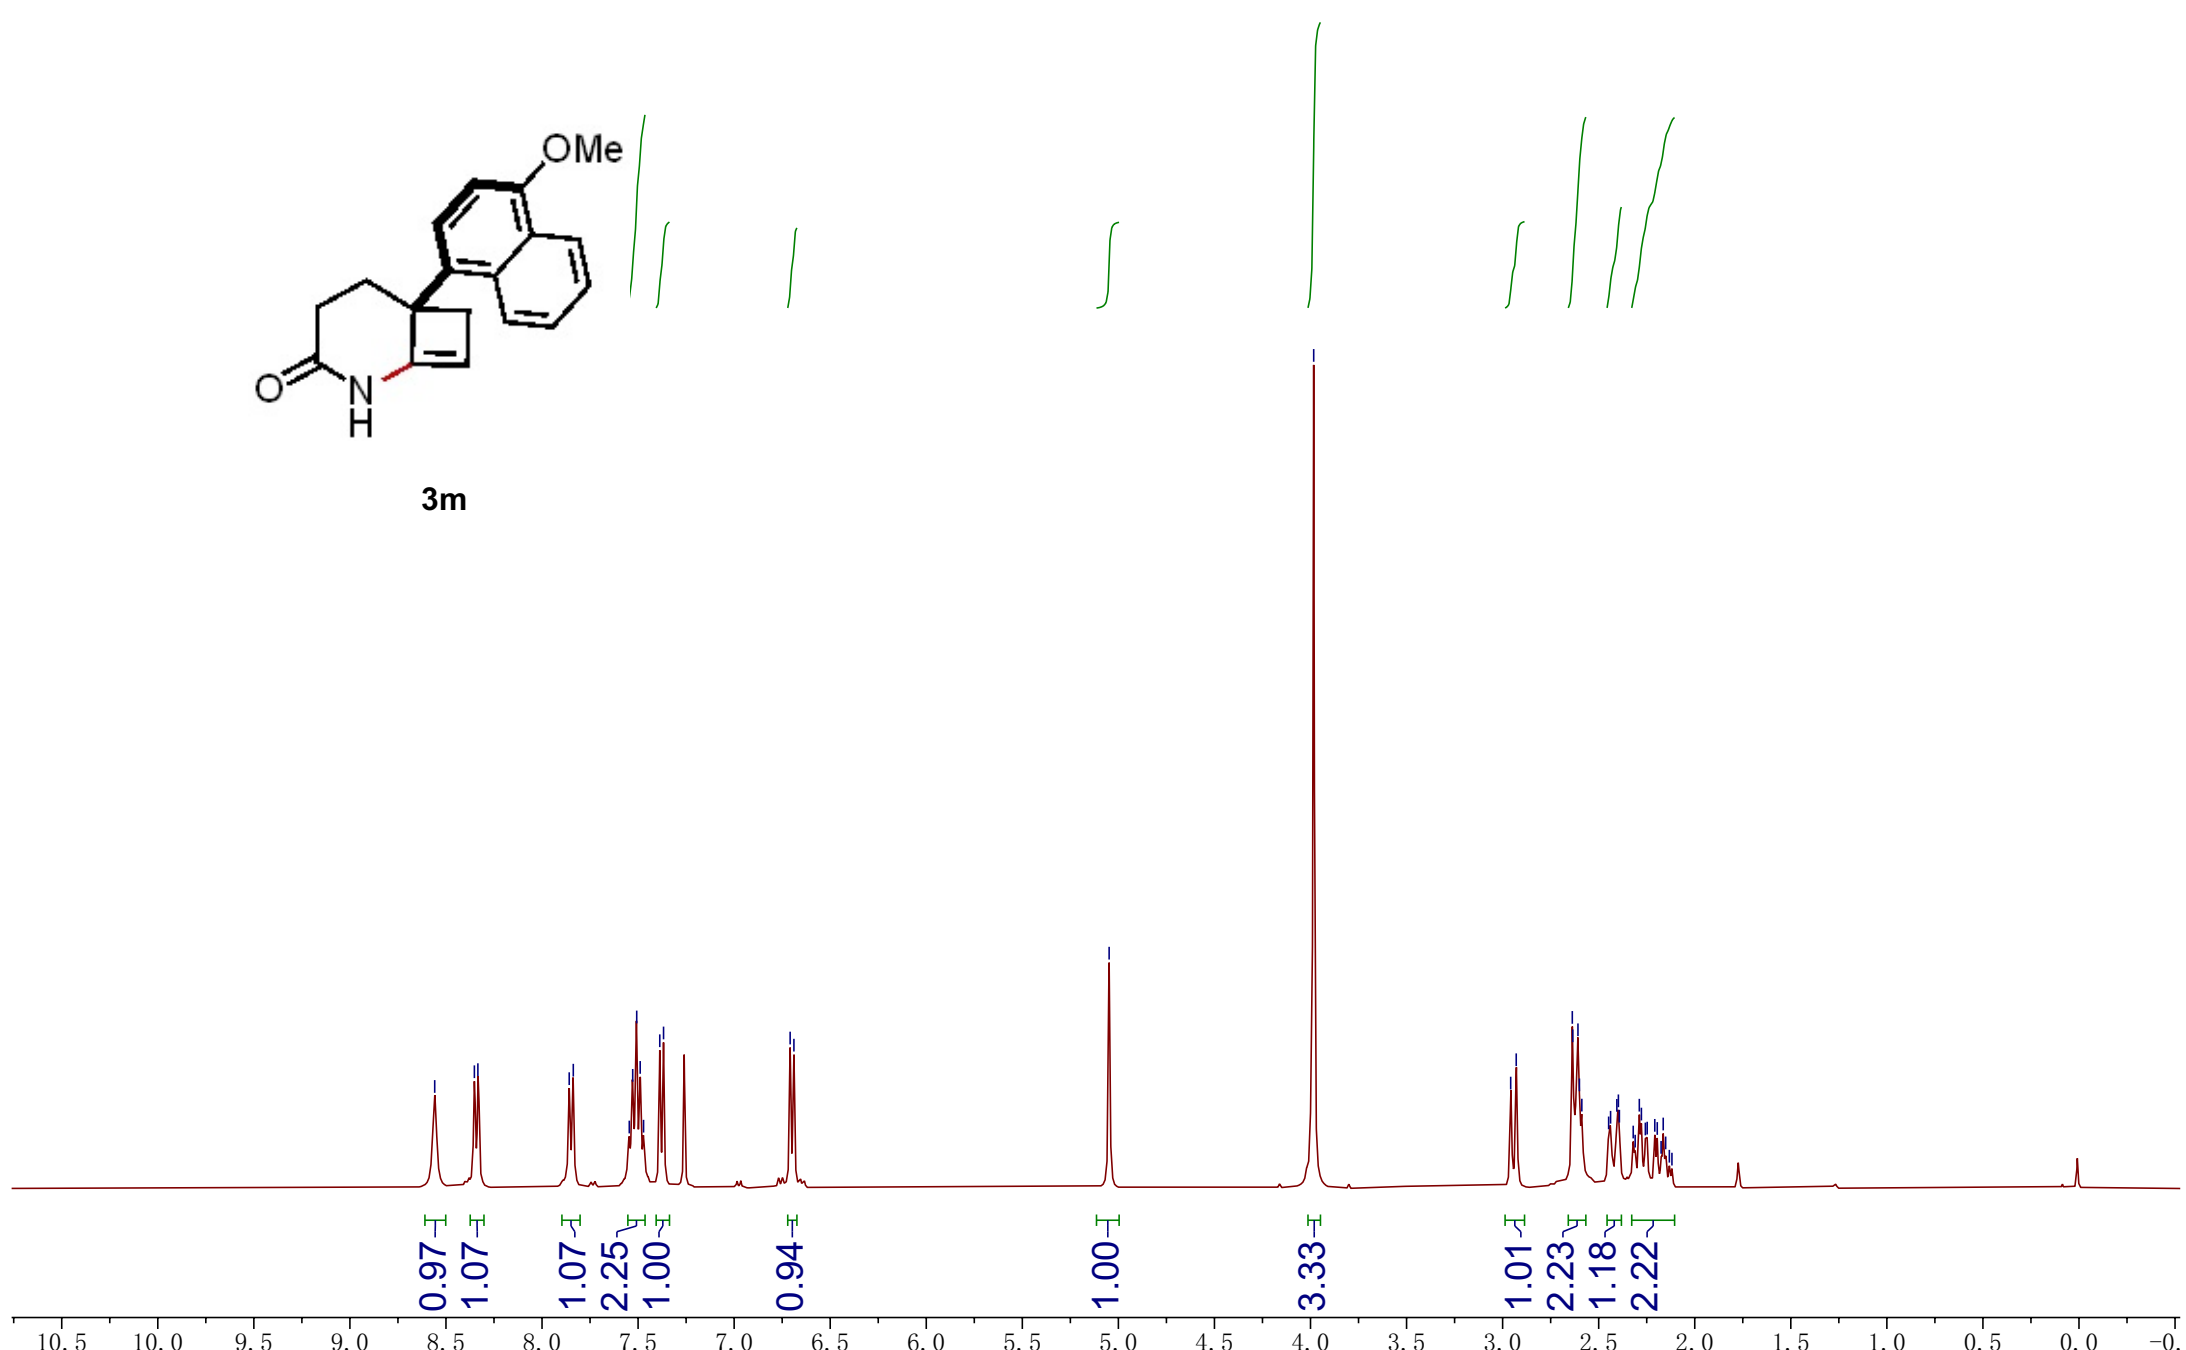

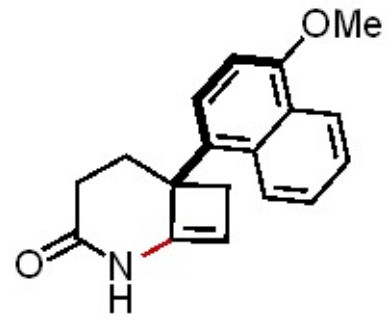

3m

—171.75

—154.91

—141.45

131.49

130.57

126.54

126.31

124.99

124.34

124.18

123.18

102.82

102.33

—55.63

—48.32

—41.30

31.52

30.71

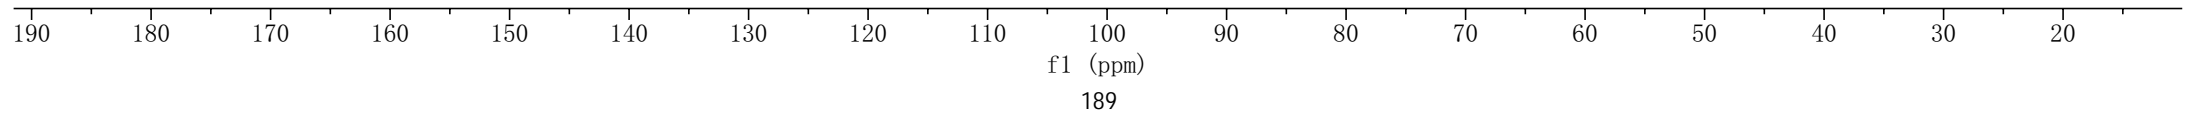

7.61, 7.59, 7.34, 7.31, 7.28, 7.26, 7.24, 7.13, 7.12, 7.10, 7.01, 6.12, 3.77, 3.01, 2.99, 2.86, 2.85, 2.84, 2.84, 2.61, 2.59, 2.58, 2.57, 2.55, 2.53, 2.52, 2.49, 2.40, 2.38, 2.37, 2.37, 2.36, 2.35, 2.15, 2.15, 2.14, 2.13, 2.13, 2.12, 2.11, 2.10, 2.09, 1.94, 1.92, 1.92, 1.91, 1.90, 1.89, 1.88, 1.87, 1.86

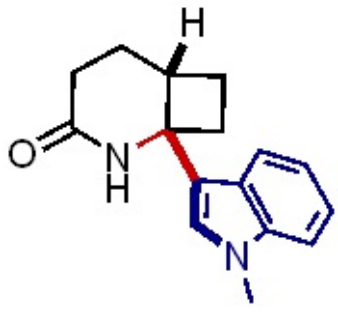

3n

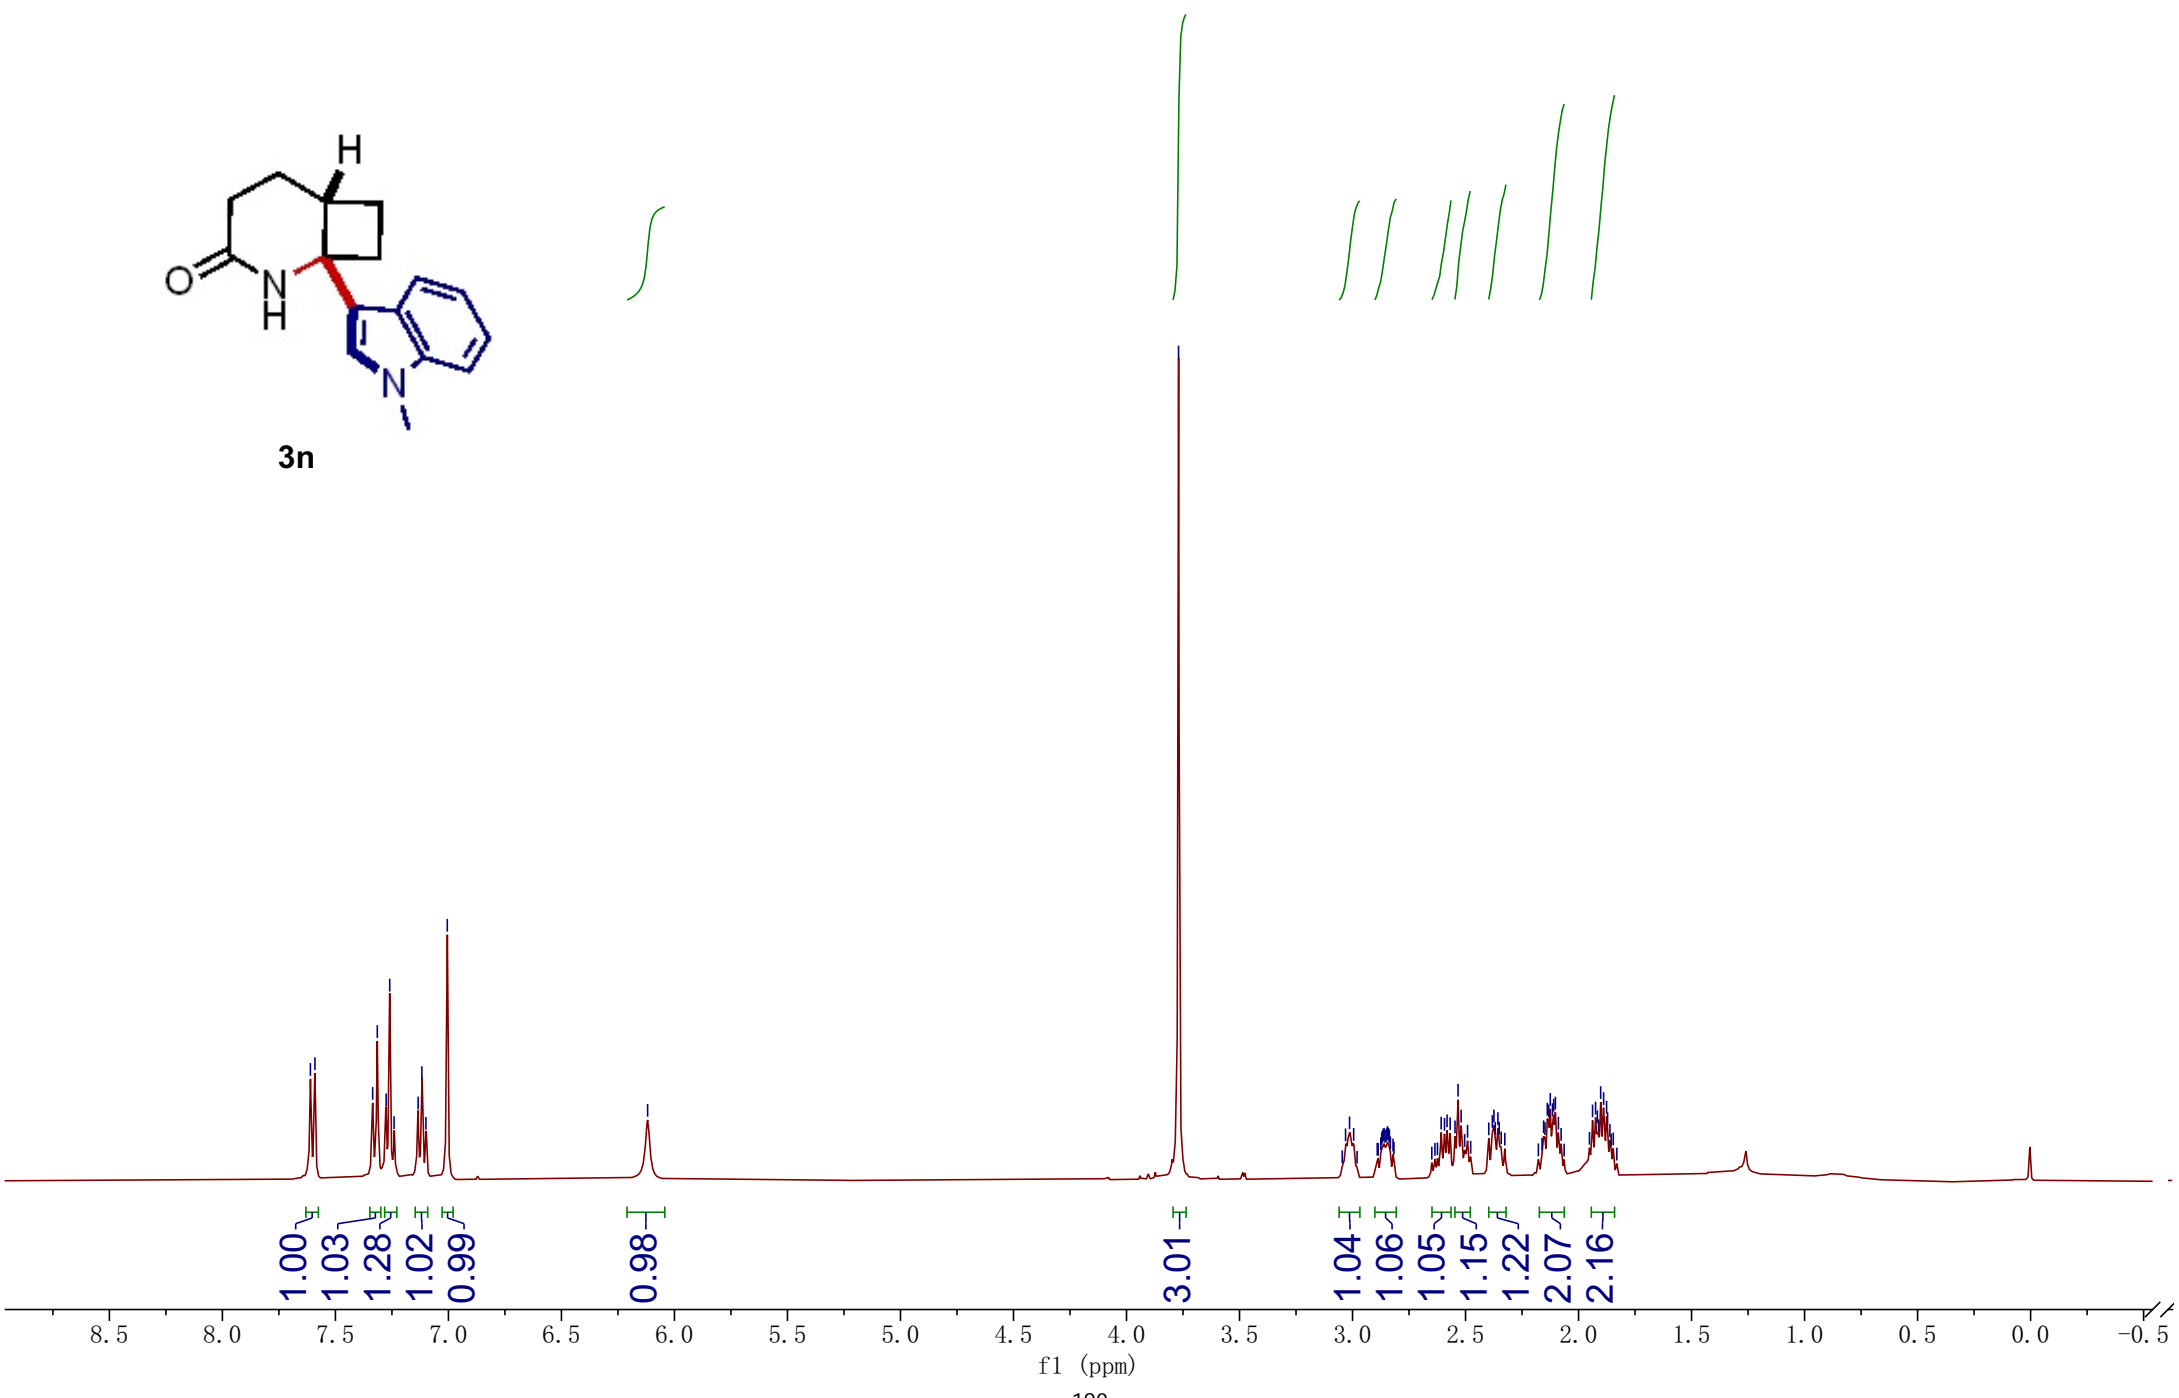

f1 (ppm)

190

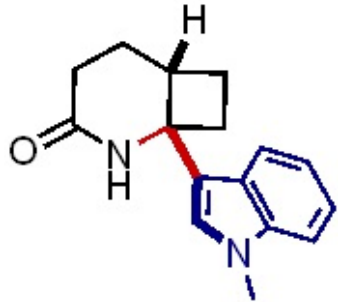

3n

—172.89  
—138.02  
125.98  
125.31  
122.22  
119.91  
119.50  
118.84  
—109.79

—57.33

~38.88  
~34.87  
~32.91  
~28.82  
~24.14  
~19.31

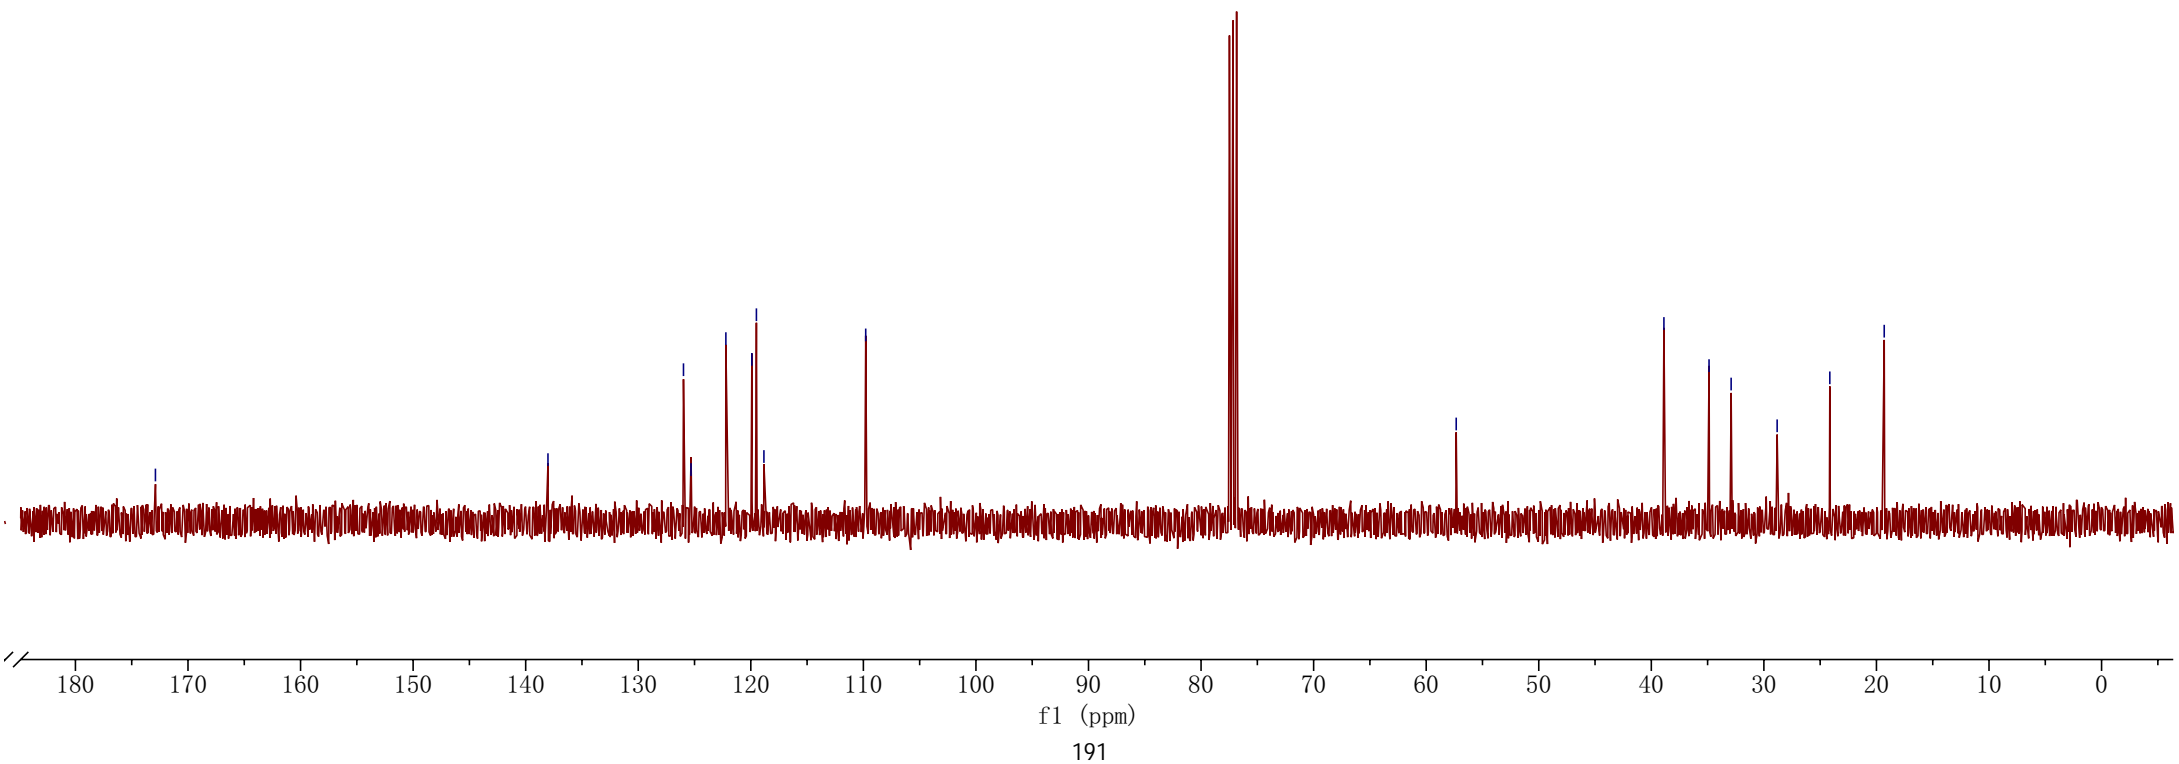

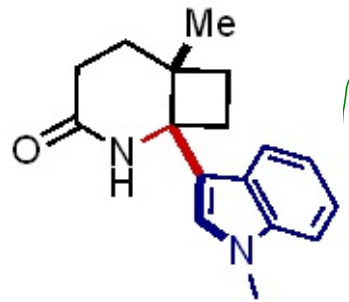

3o

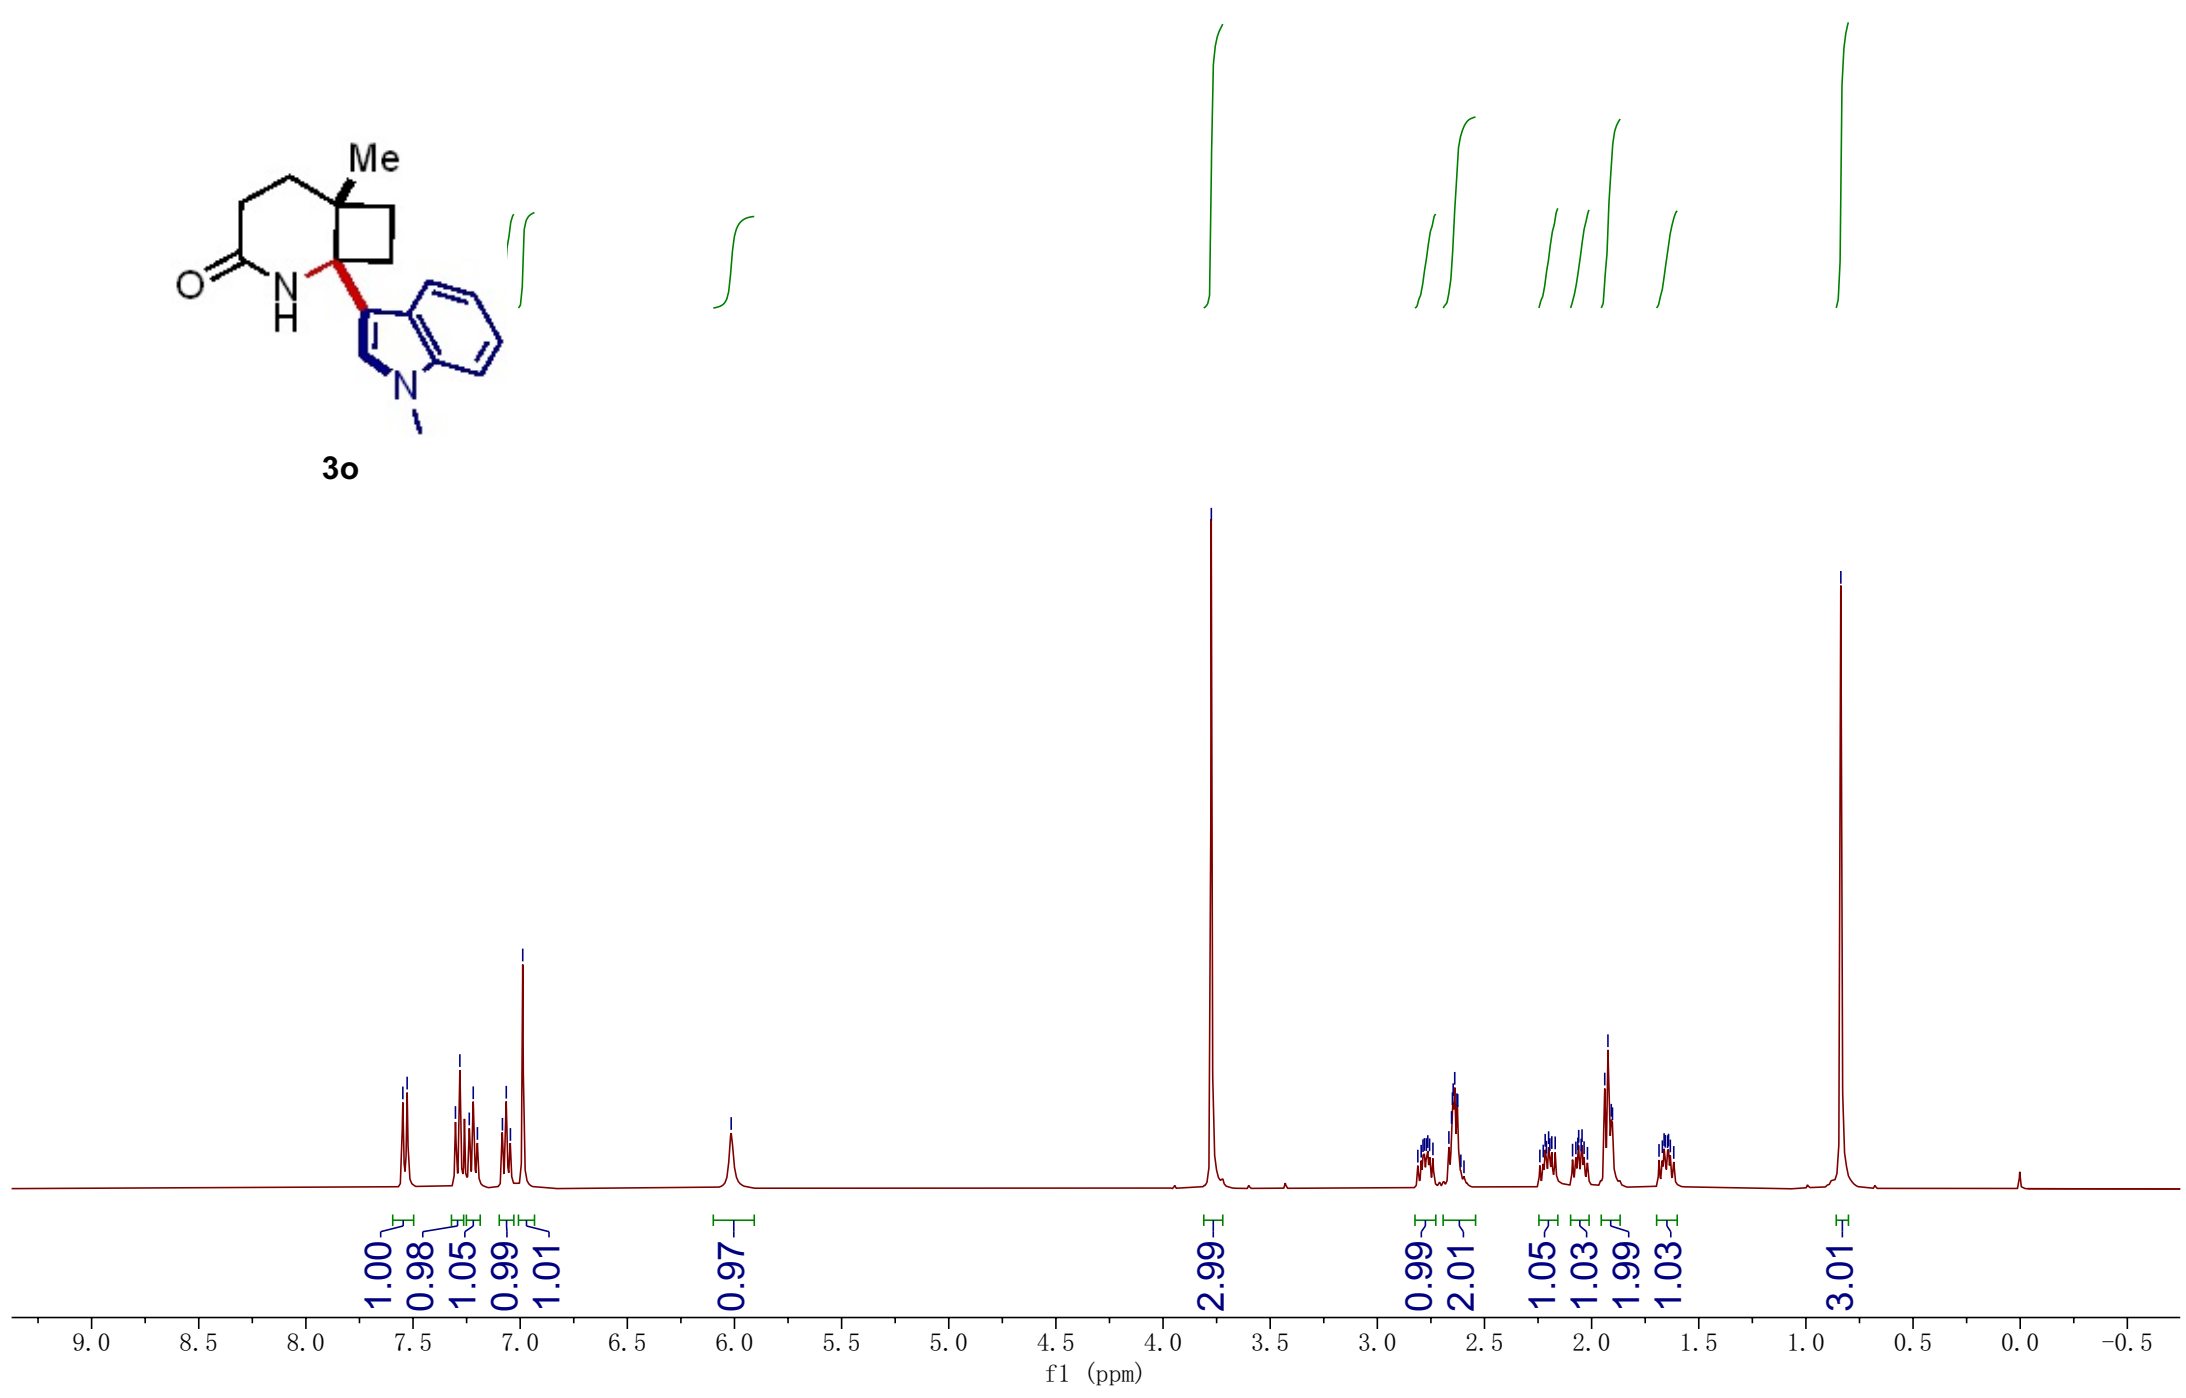

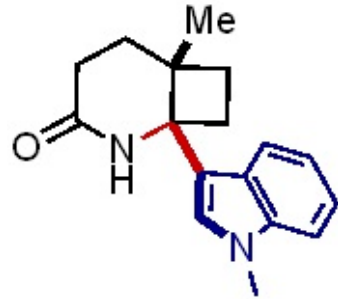

3o

-172.68

-137.90

127.31

126.47

122.02

120.83

119.55

115.97

109.51

-61.15

-41.19

32.93

31.89

31.75

29.24

25.57

25.02

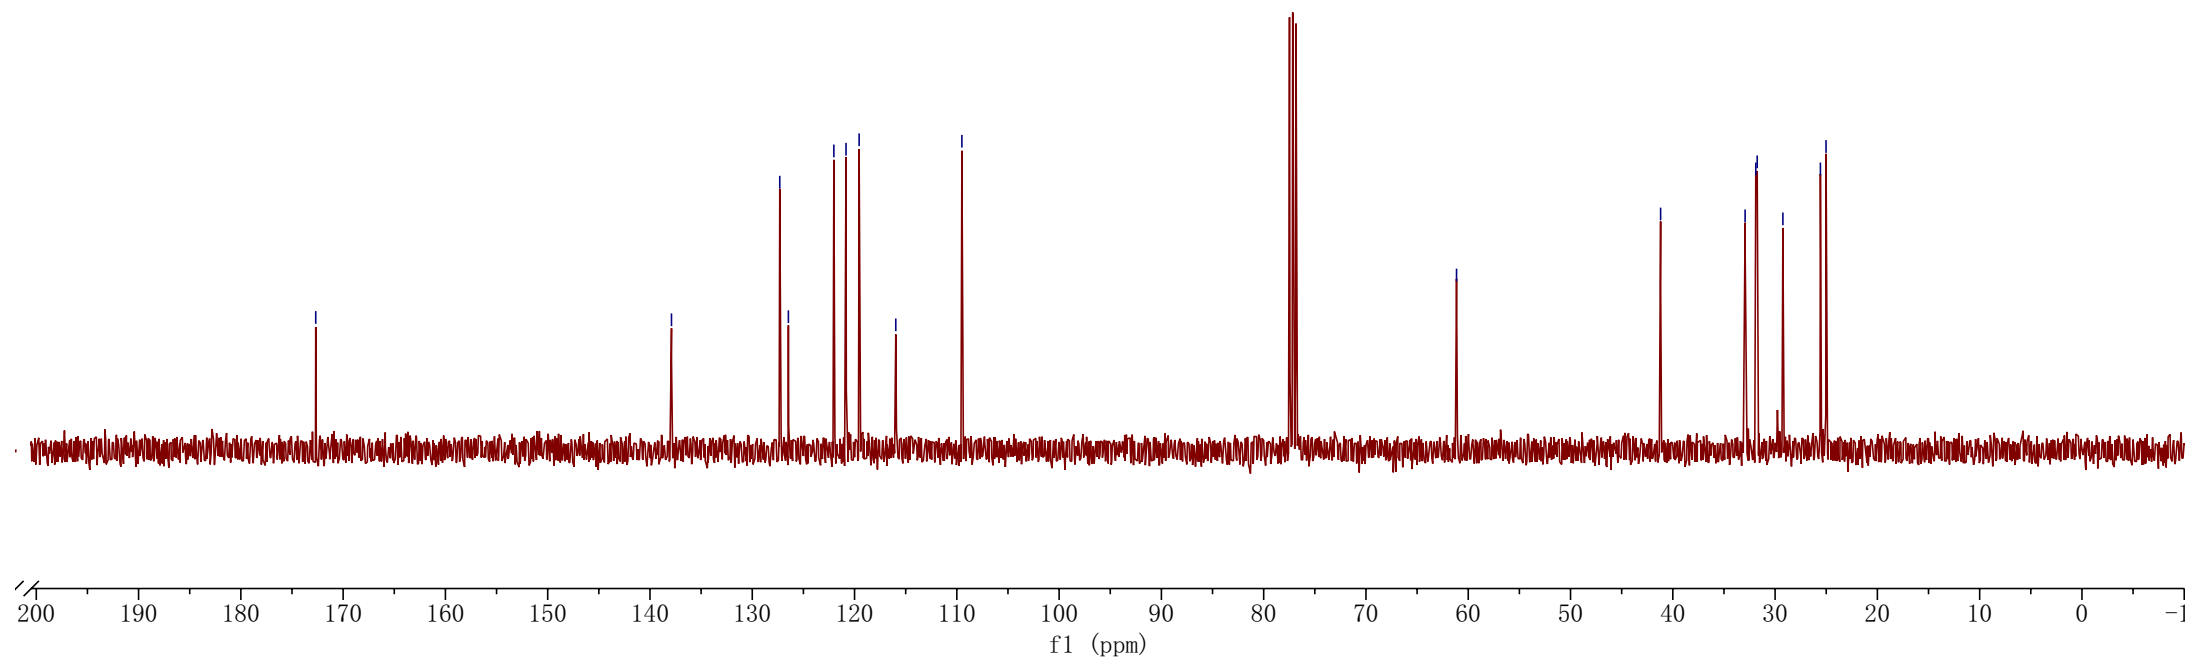

f1 (ppm)

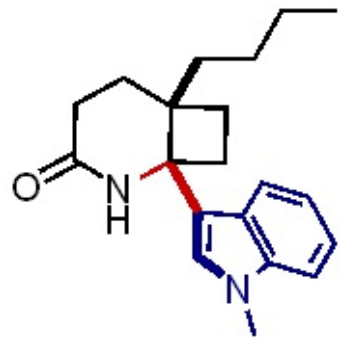

3p

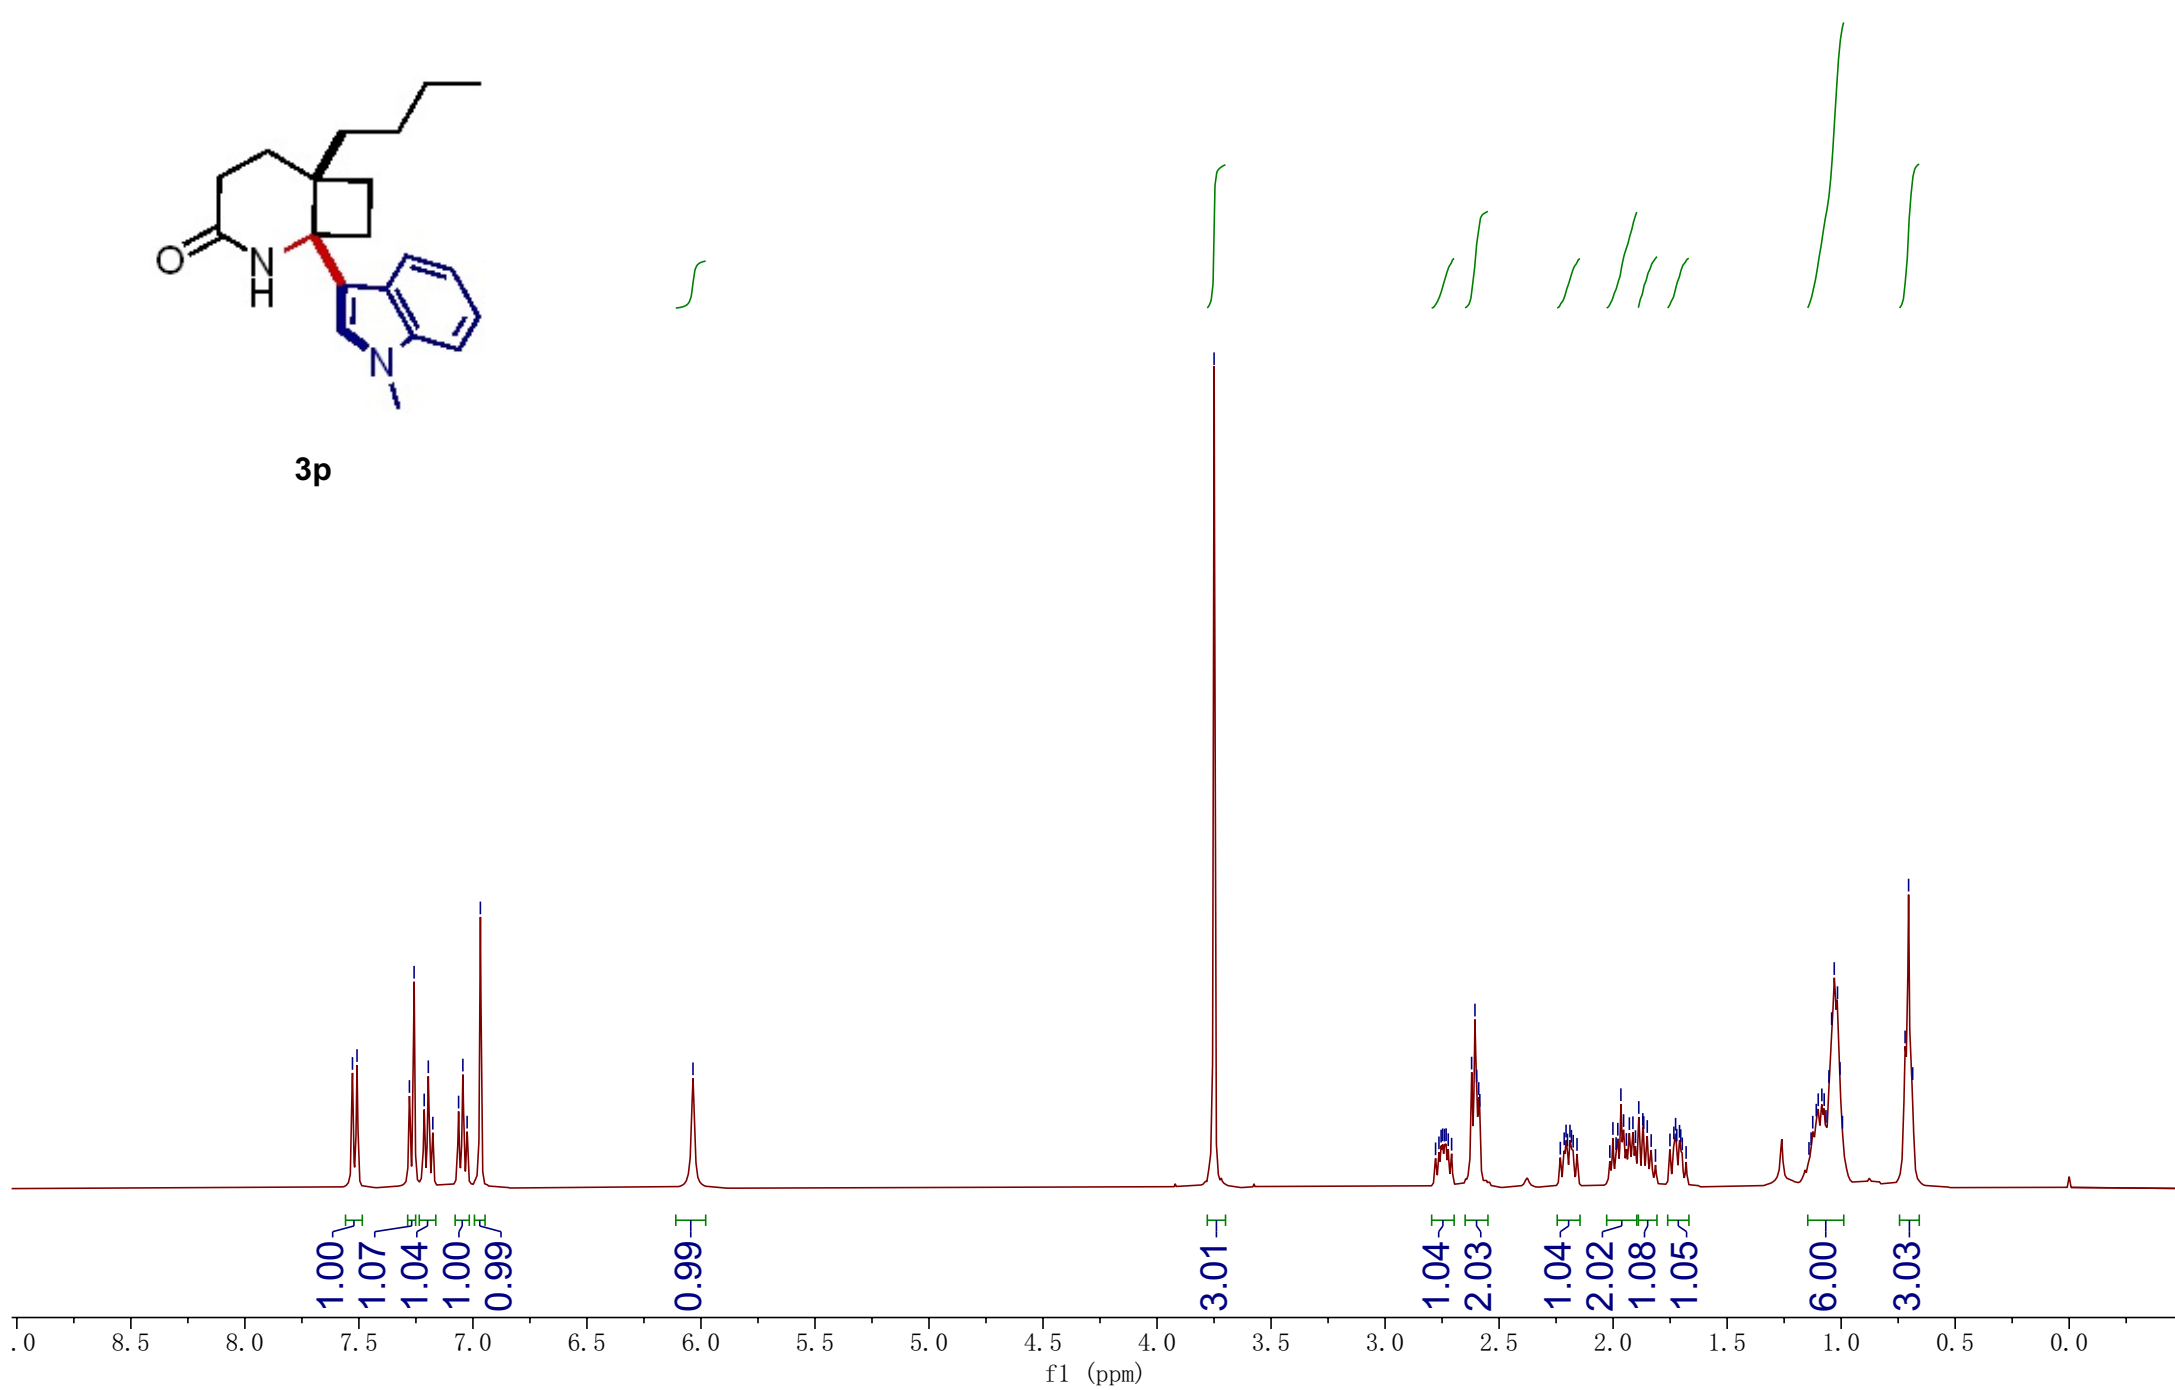

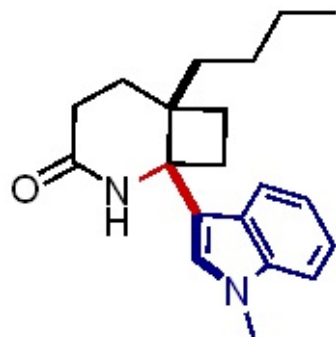

3p

-172.67

-137.83

127.36

126.69

121.85

120.88

119.43

115.52

109.38

-61.47

-44.40

36.44

32.83

32.28

29.00

28.36

25.96

23.45

23.16

14.11

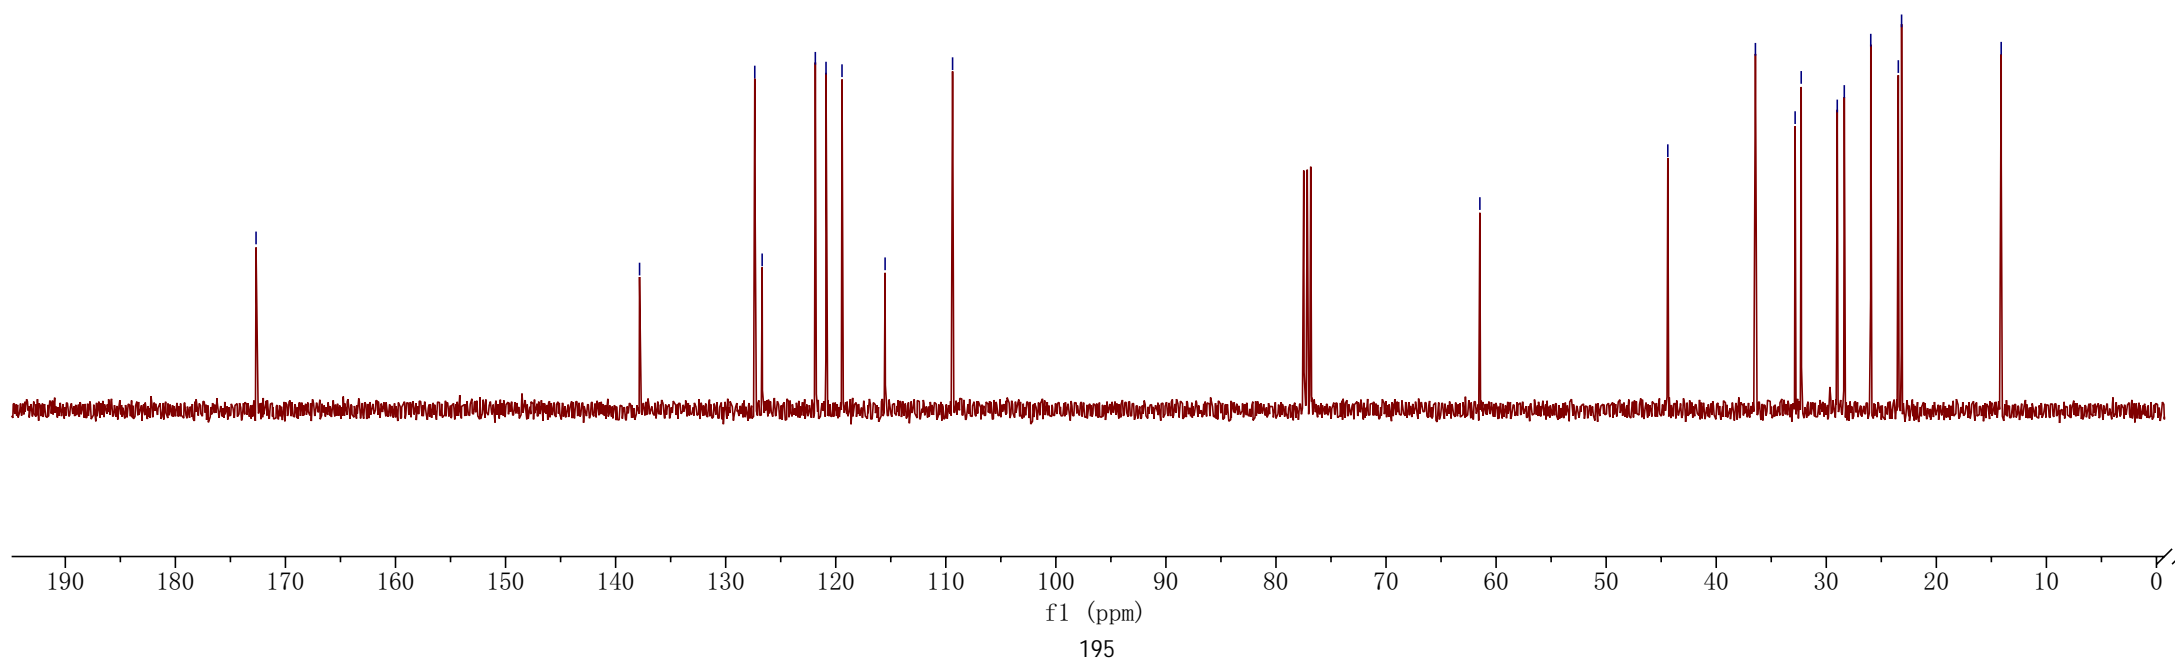

xgc\_1-130\_1\_f1.d  
11110-D  
0

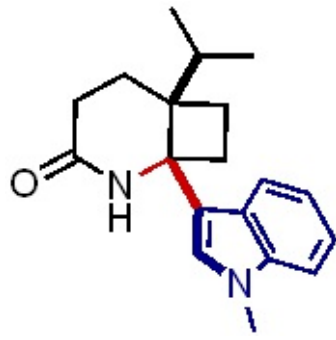

3q

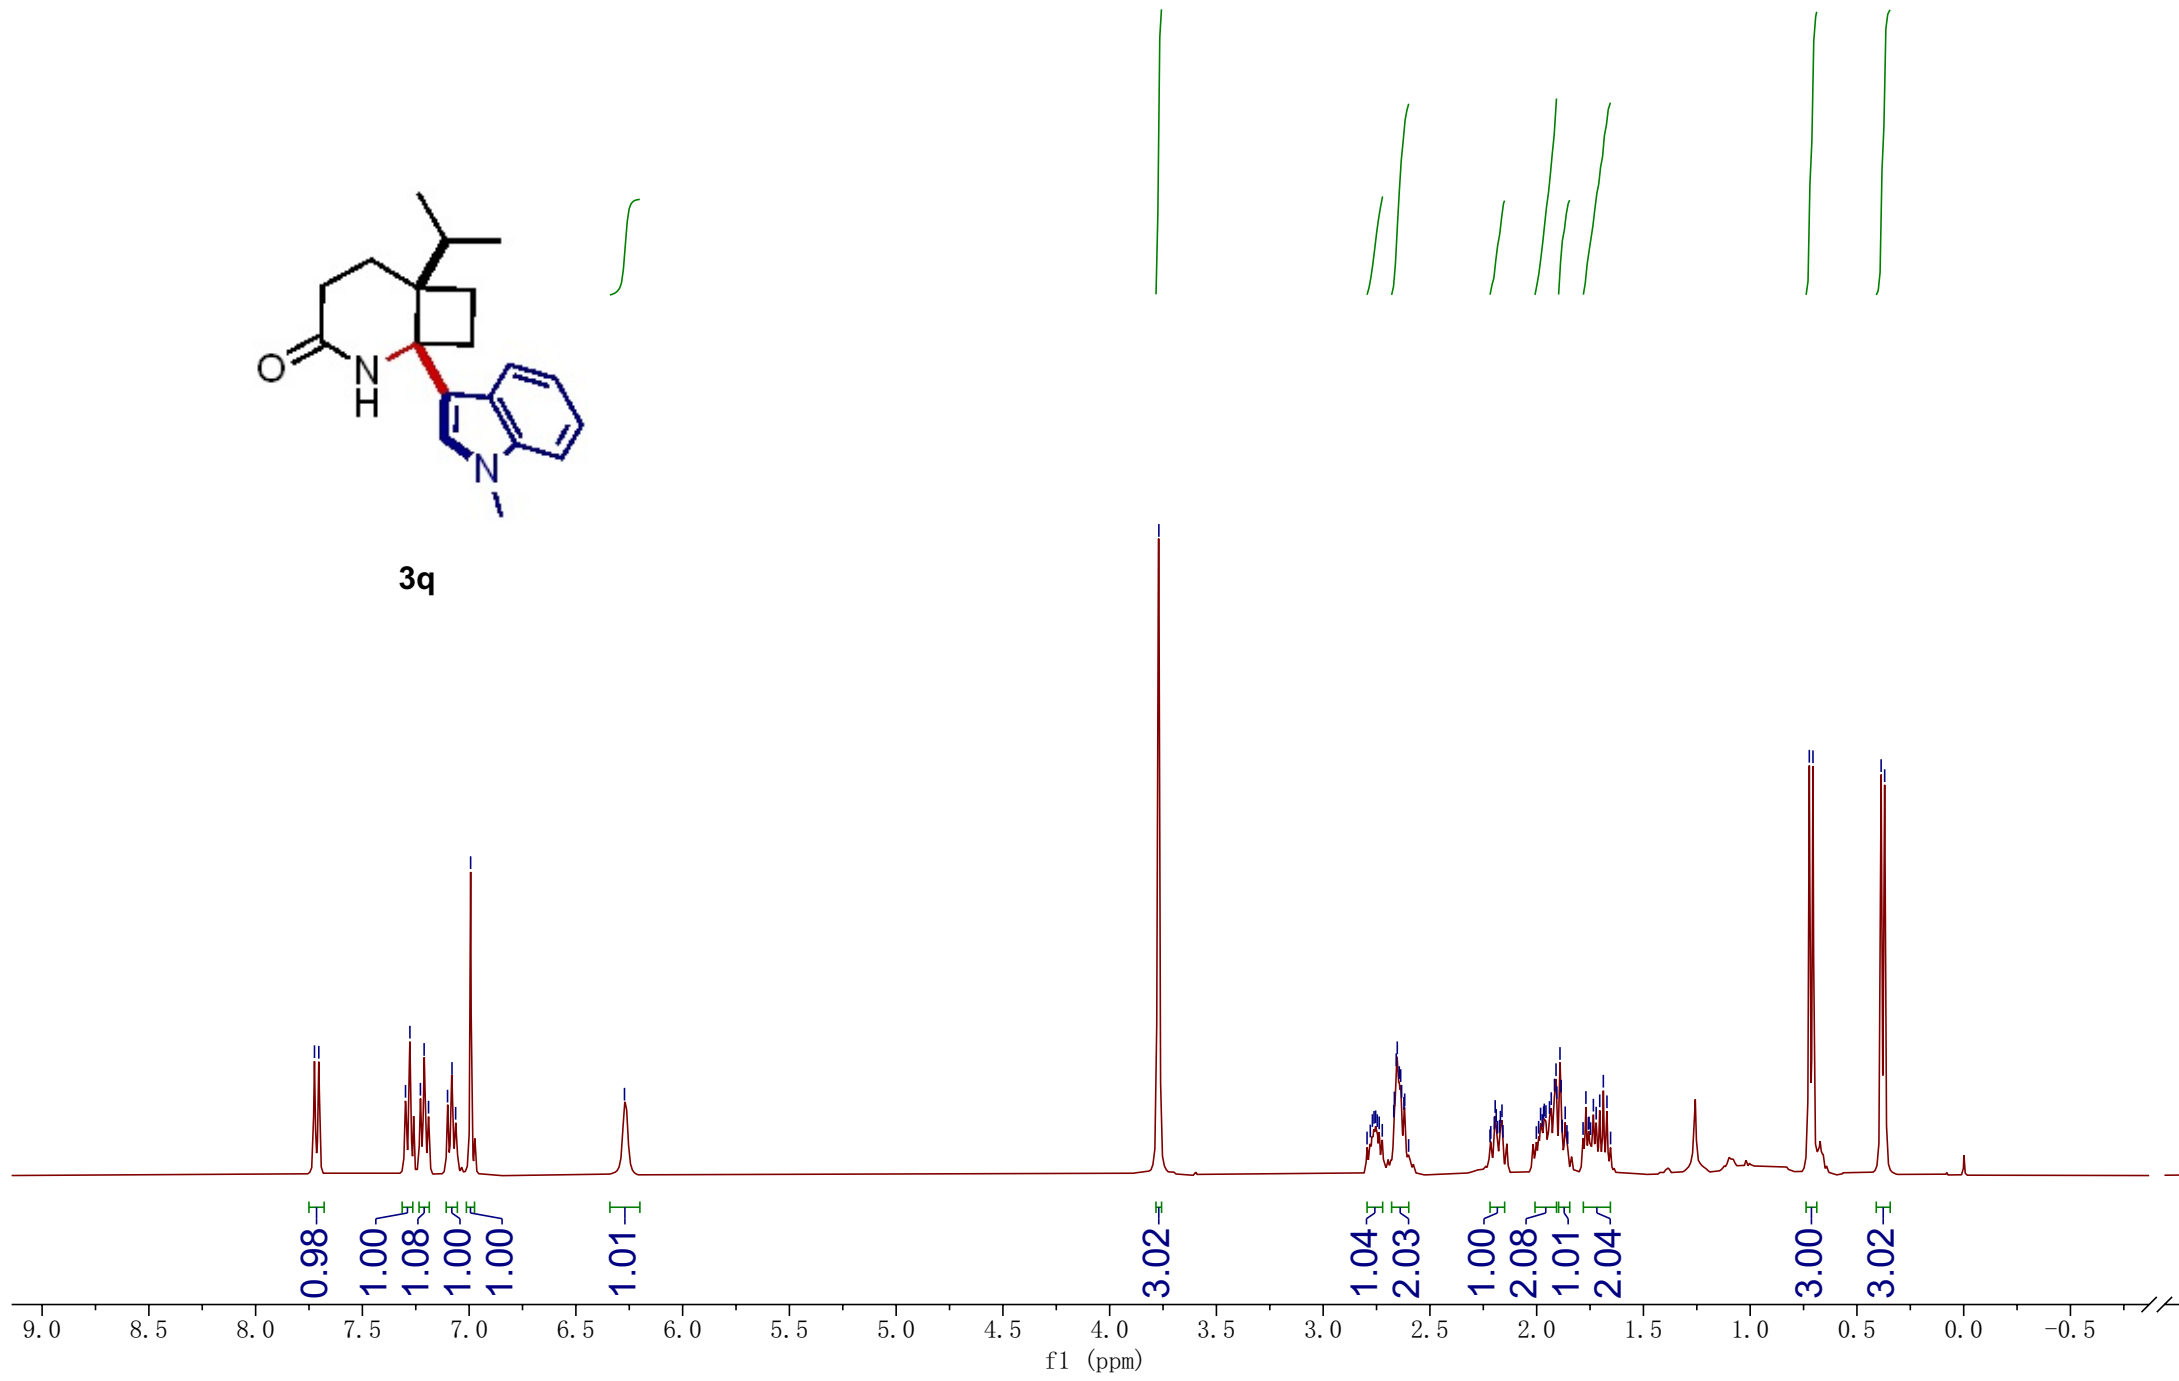

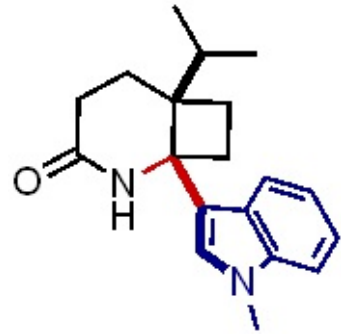

3q

—173.63

—137.58

—127.65

—126.57

—121.86

—121.16

—119.62

—115.94

—109.60

—61.78

—48.84

—34.48

—33.25

—32.95

—29.75

—25.19

—23.19

—17.82

—17.28

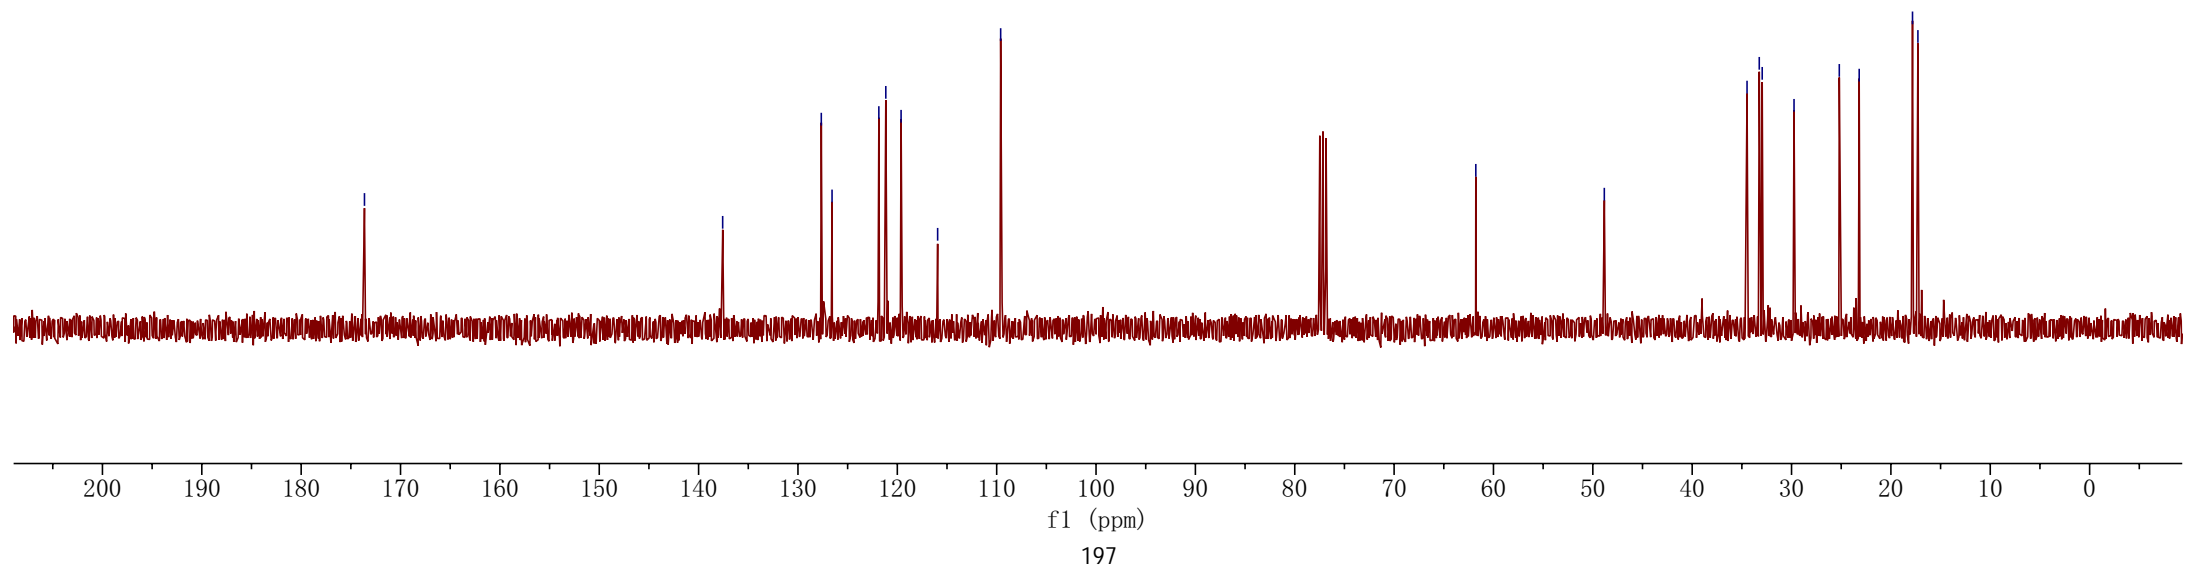

x6  
120  
0

7.59  
7.51  
7.28  
7.26  
7.22  
7.20  
7.18  
7.06  
7.05  
7.03  
6.97  
6.04  
4.82  
4.79  
3.75  
2.62  
2.61  
2.59  
2.21  
2.19  
2.00  
1.98  
1.97  
1.95  
1.95  
1.94  
1.93  
1.92  
1.92  
1.89  
1.88  
1.87  
1.86  
1.86  
1.77  
1.75  
1.73  
1.73  
1.72  
1.71  
1.70  
1.70  
1.17  
1.17  
1.16  
1.15  
1.14  
1.13  
1.12  
1.11  
1.10

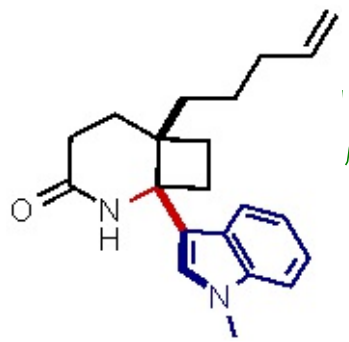

3r

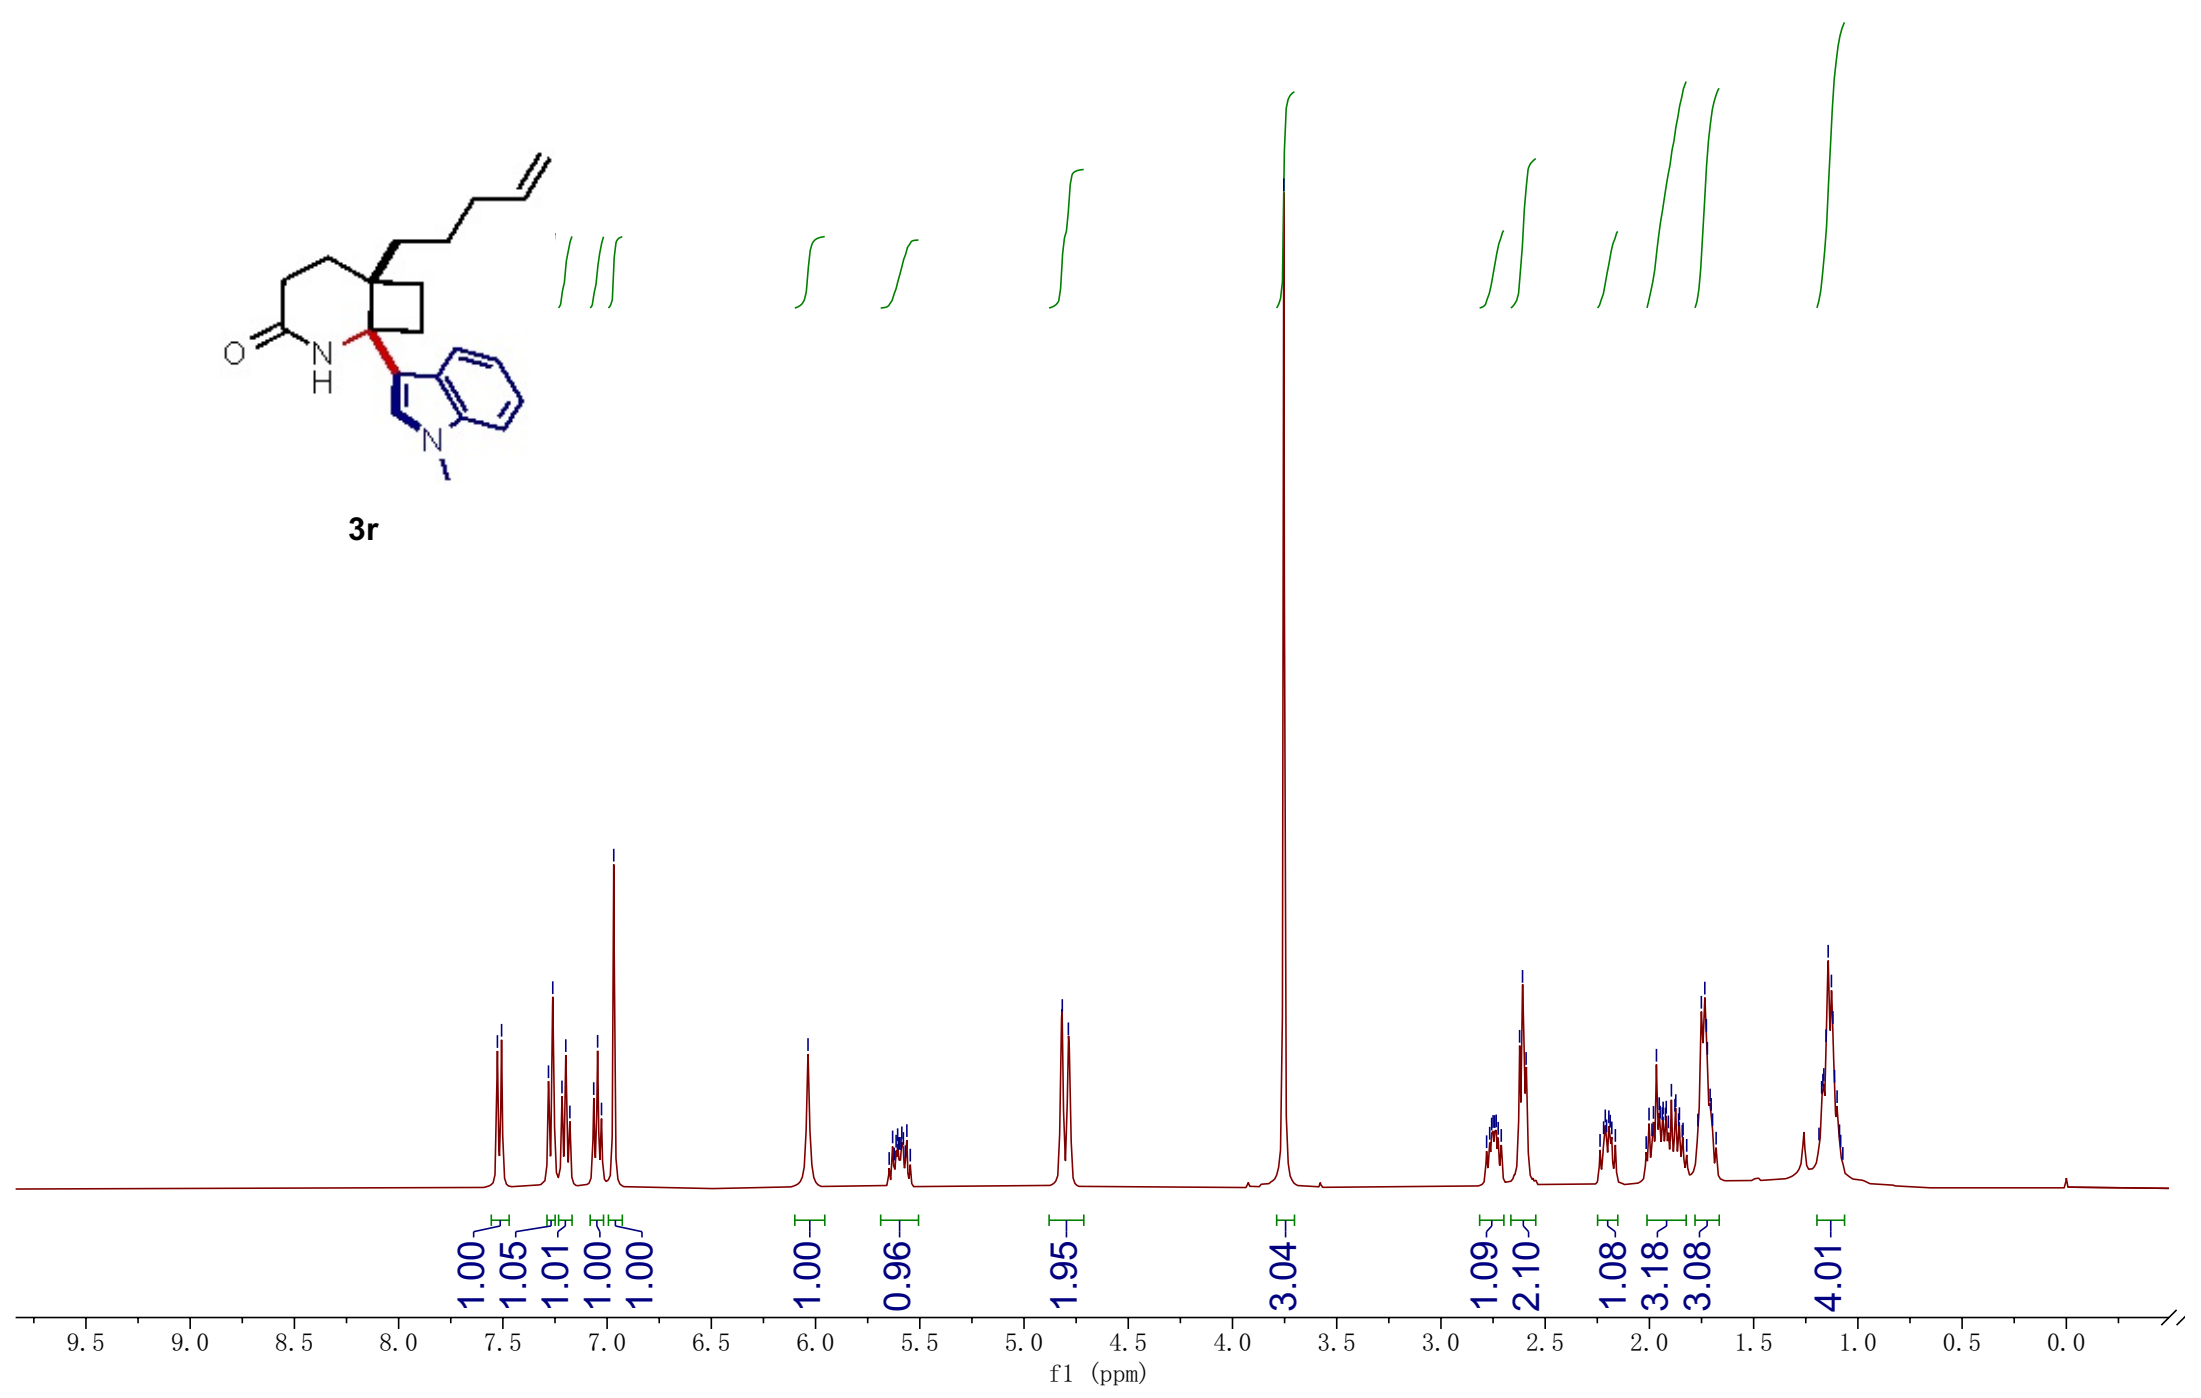

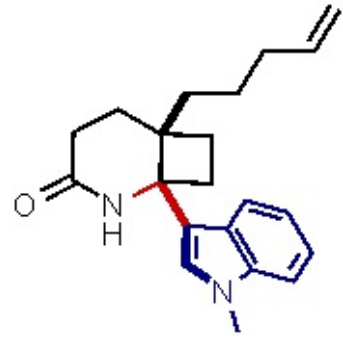

3r

—172.60

138.58  
137.83  
127.37  
126.66  
121.90  
120.86  
119.47  
115.42  
114.22  
109.40

—61.43

—44.38  
36.29  
34.06  
32.84  
32.30  
28.99  
28.37  
23.46  
23.19

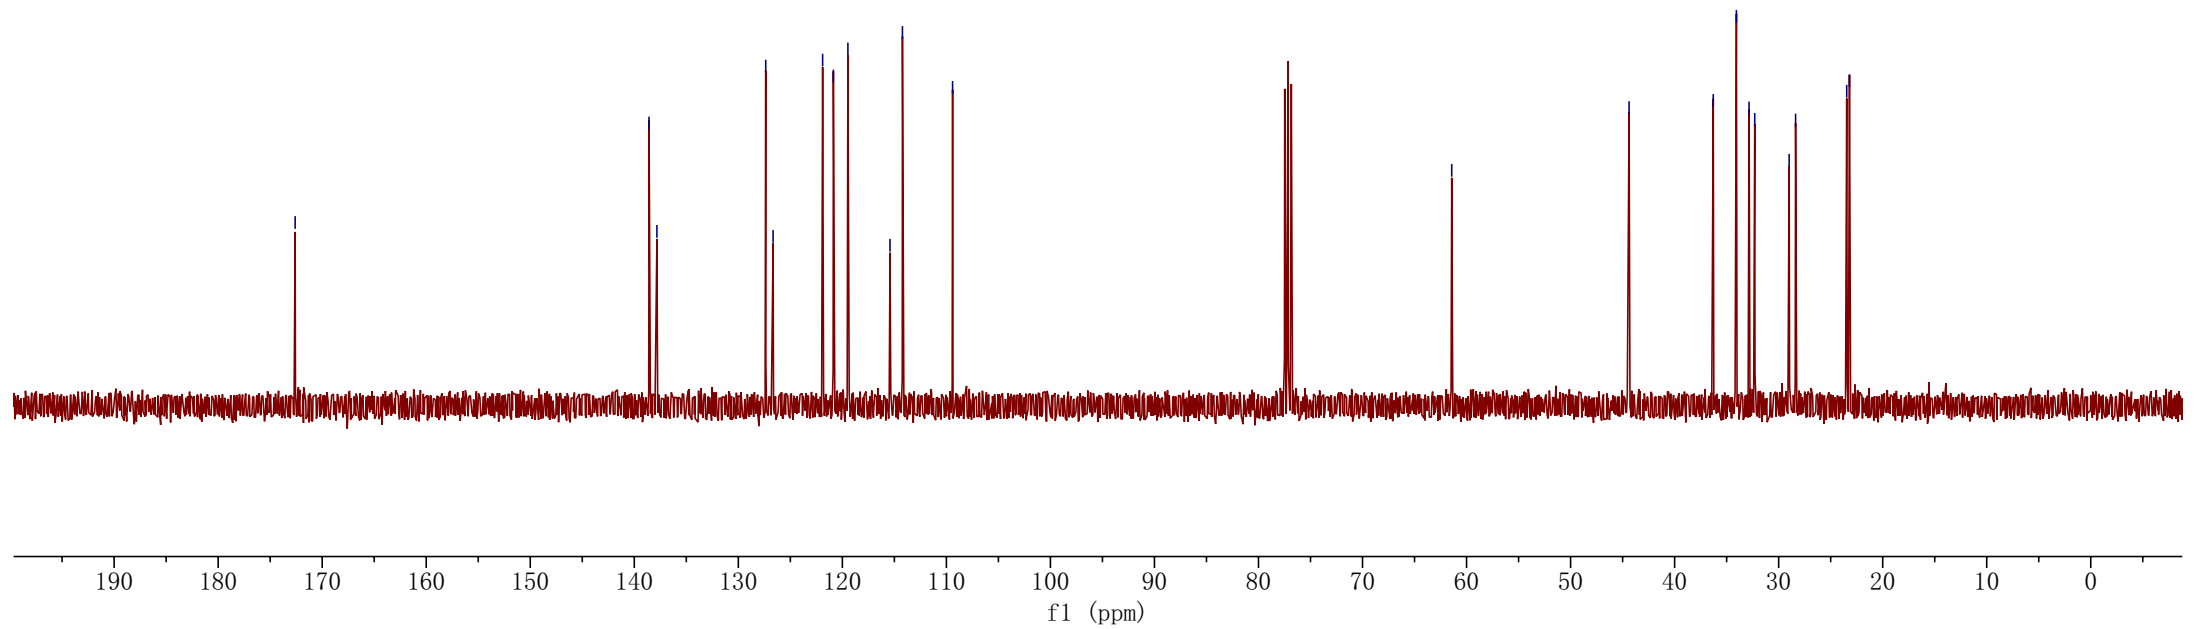

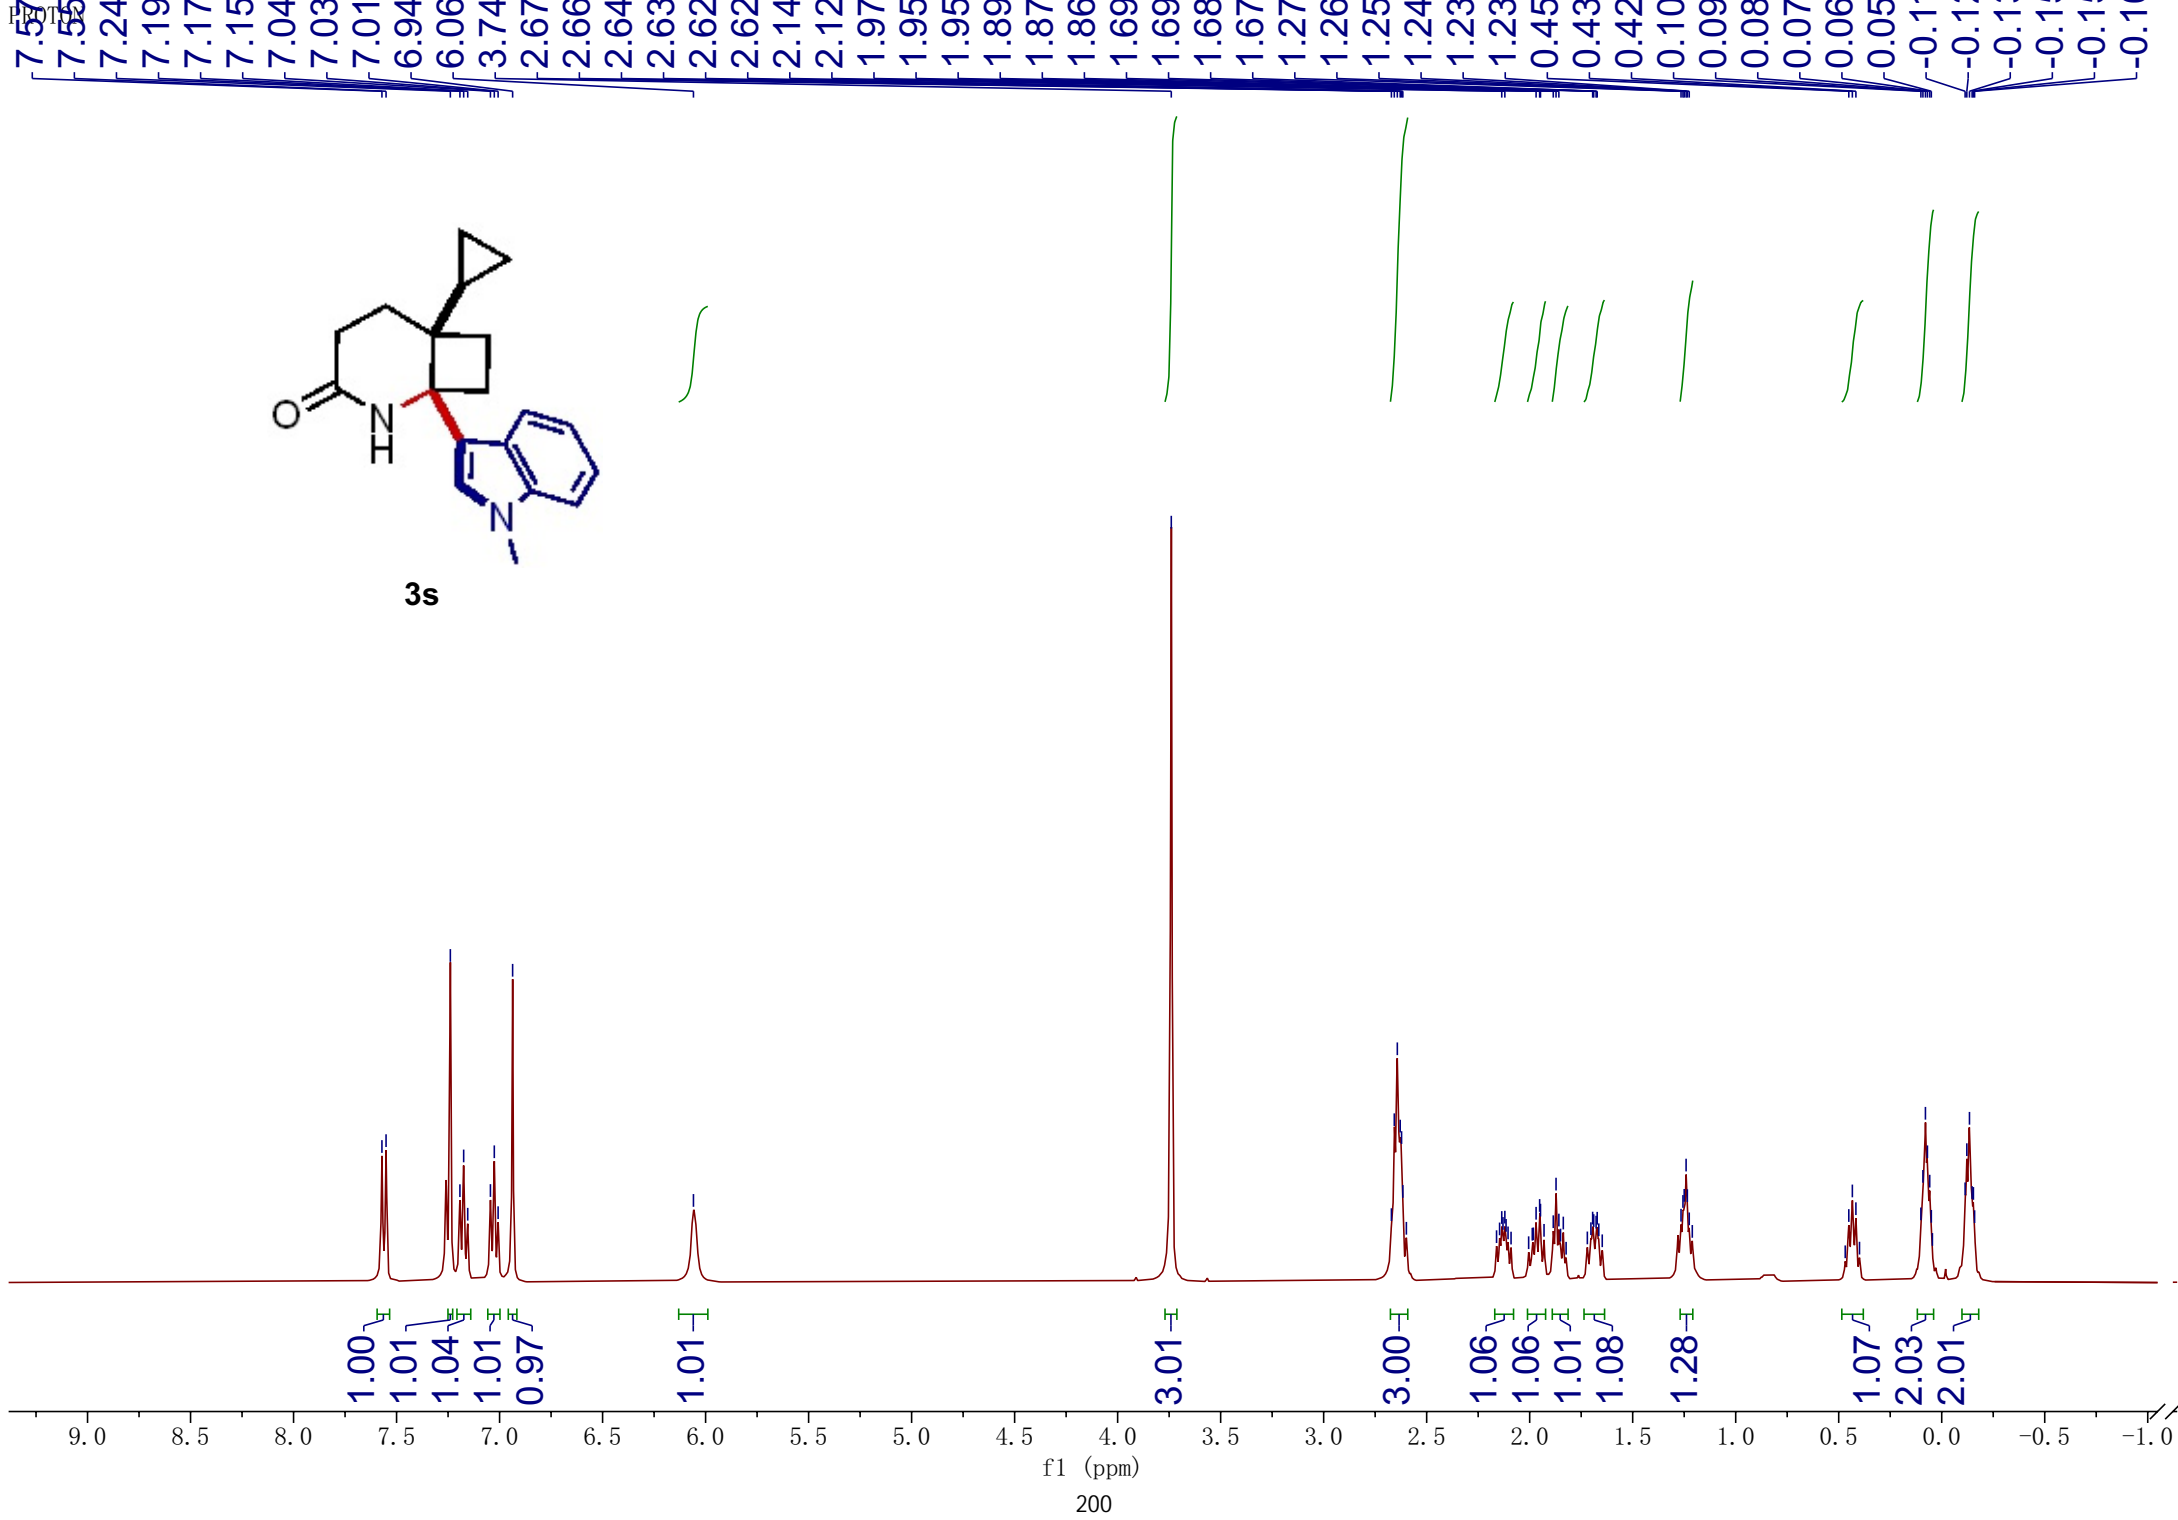

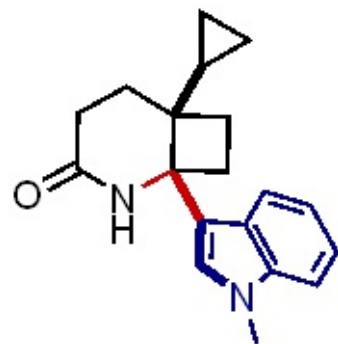

**3s**

—172.46

—137.83

127.38

126.83

121.76

120.81

119.30

115.76

109.32

—61.46

—44.58

32.82

32.07

30.54

29.01

18.28

16.20

~2.19

~-0.36

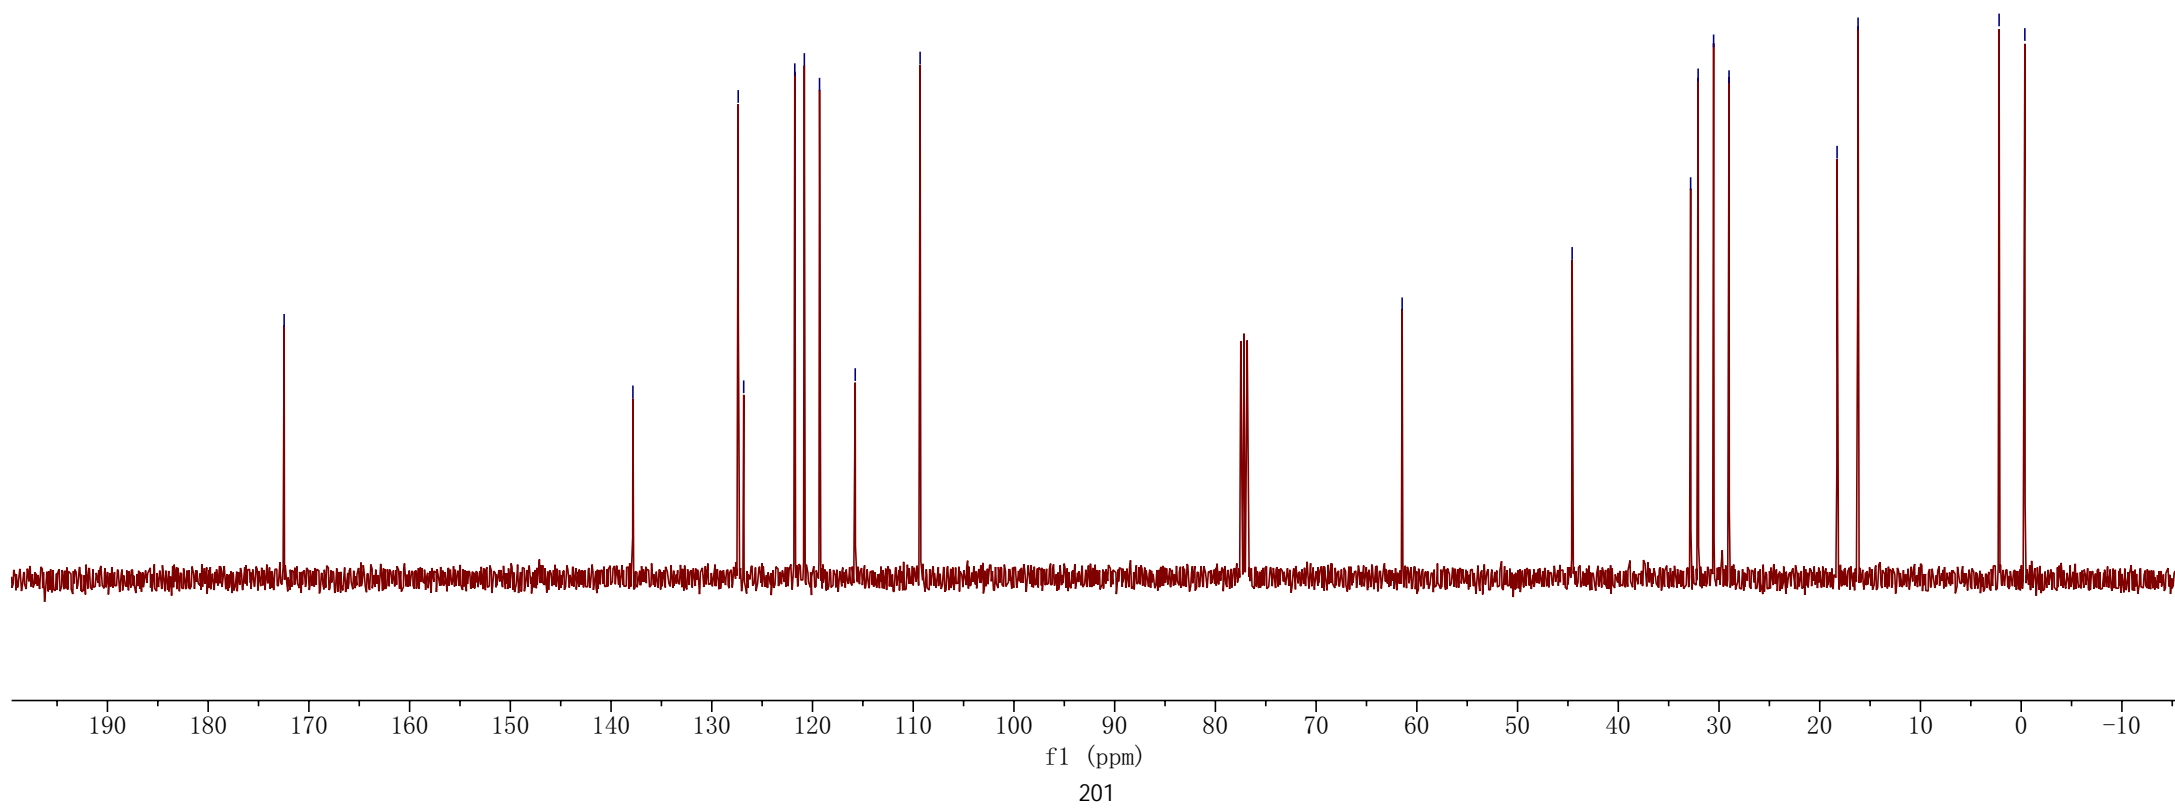

xge42-01.fid  
111  
0

7.54 7.52 7.28 7.27 7.23 7.21 7.19 7.08 7.06 7.04 6.89 5.97 3.74 2.70 2.69 2.68 2.68 2.67 2.65 2.63 2.61 2.26 2.24 2.17 2.17 2.16 2.15 2.02 2.01 2.00 1.98 1.92 1.90 1.89 1.88 1.82 1.81 1.79 1.67 1.47 1.47 1.45 1.44 1.43 1.42 1.41 1.40 0.87 0.87 0.86 0.85

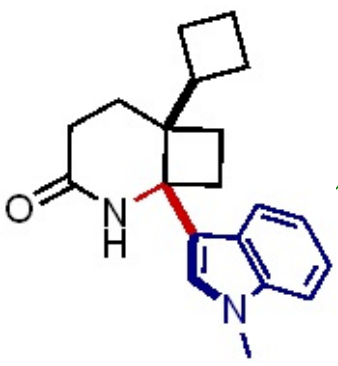

3t

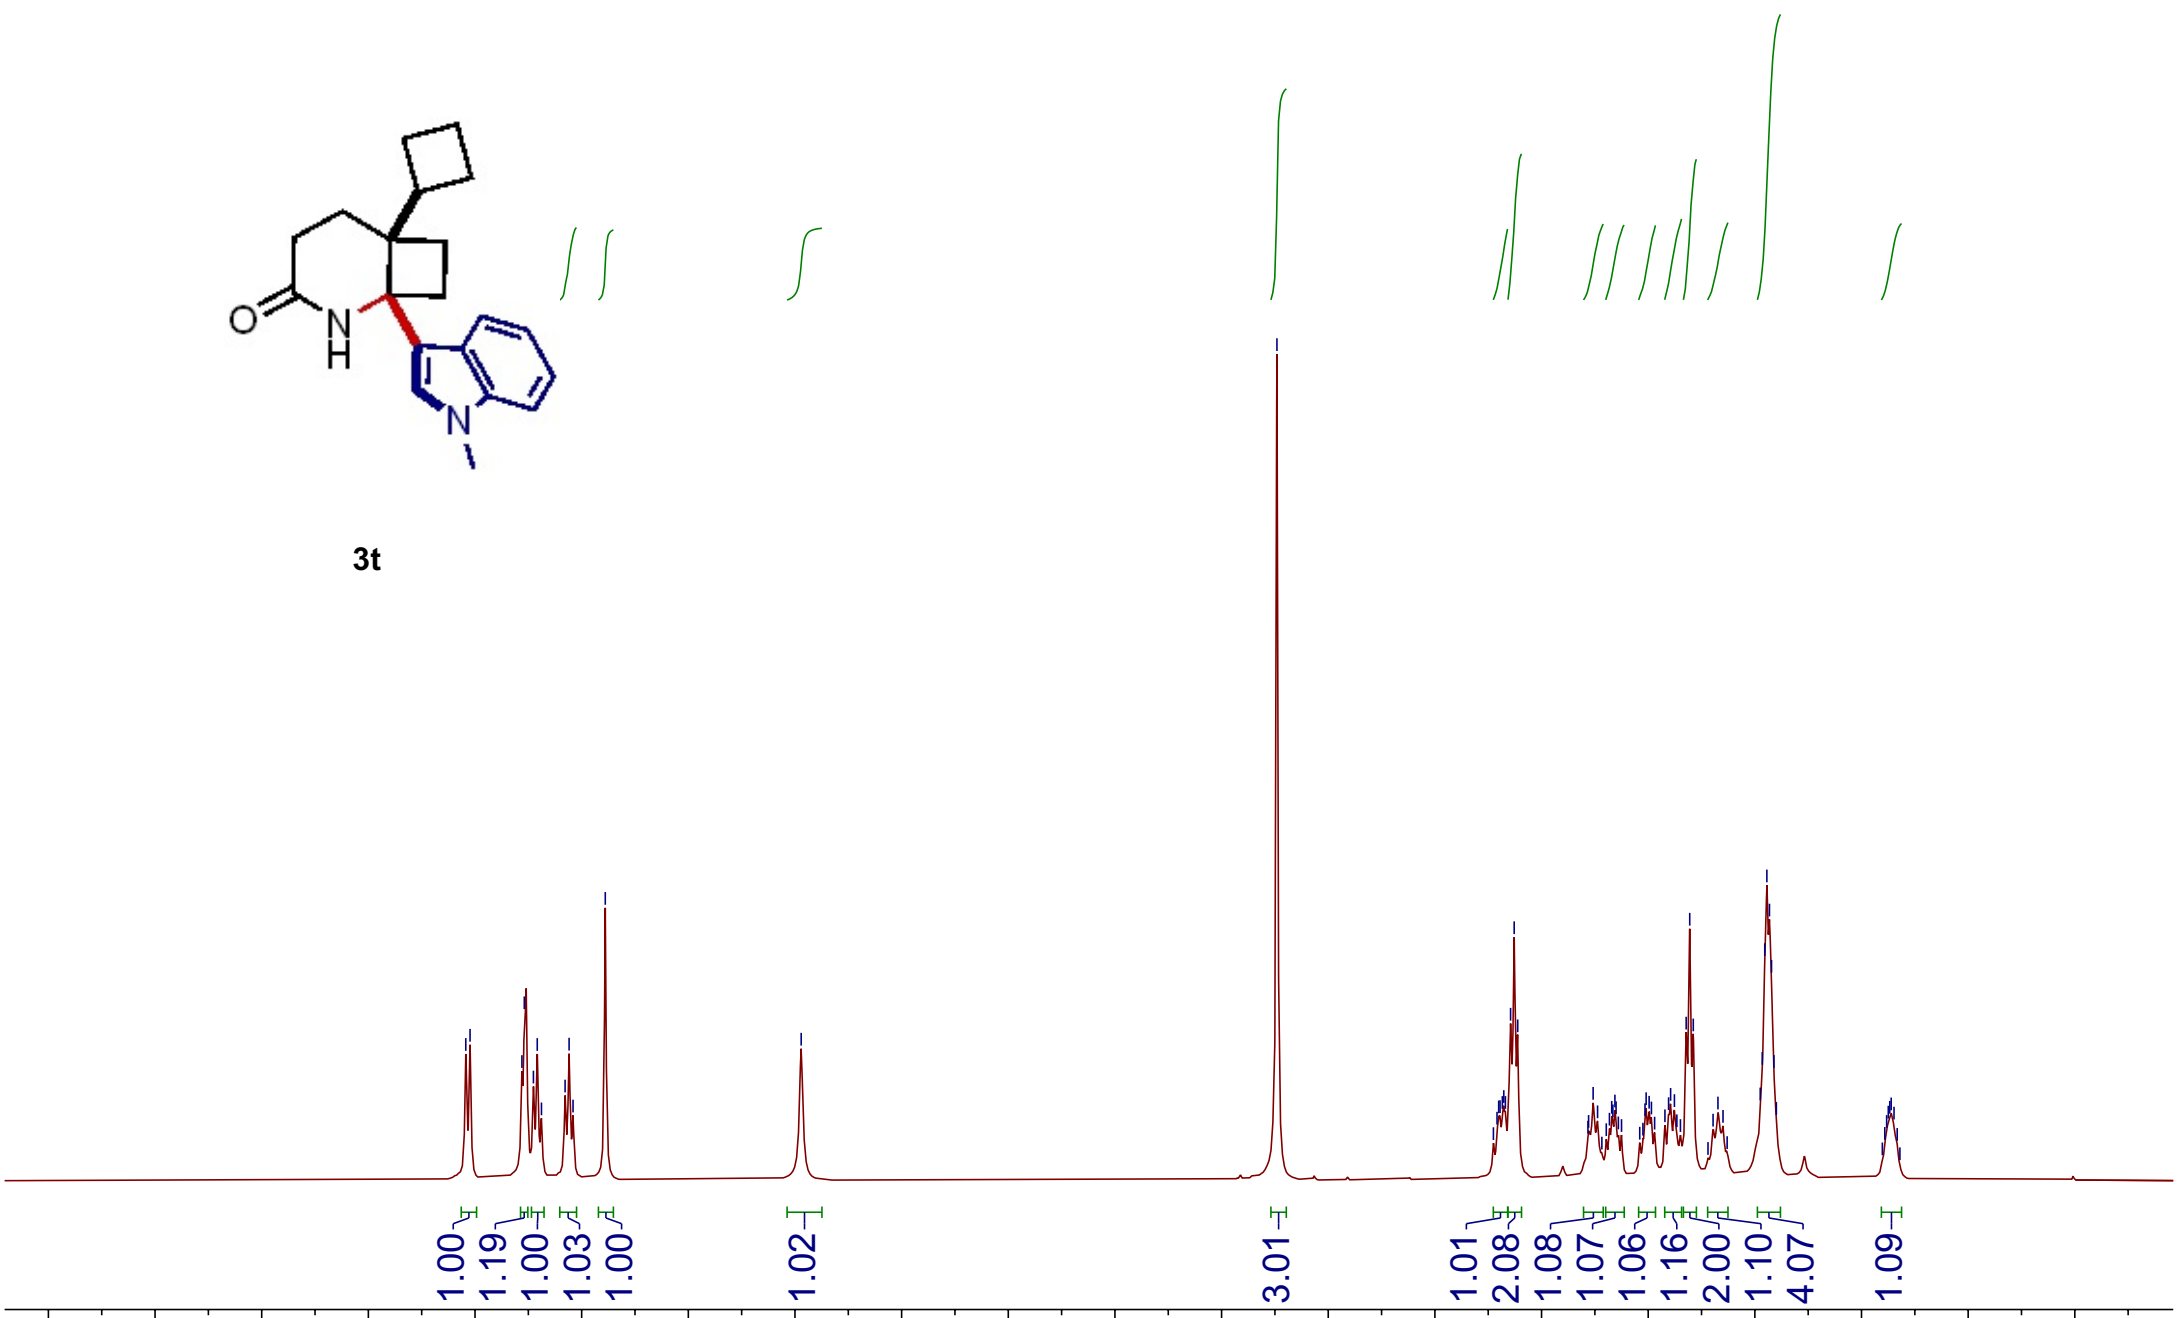

f1 (ppm)

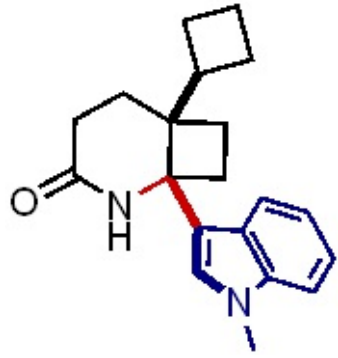

3t

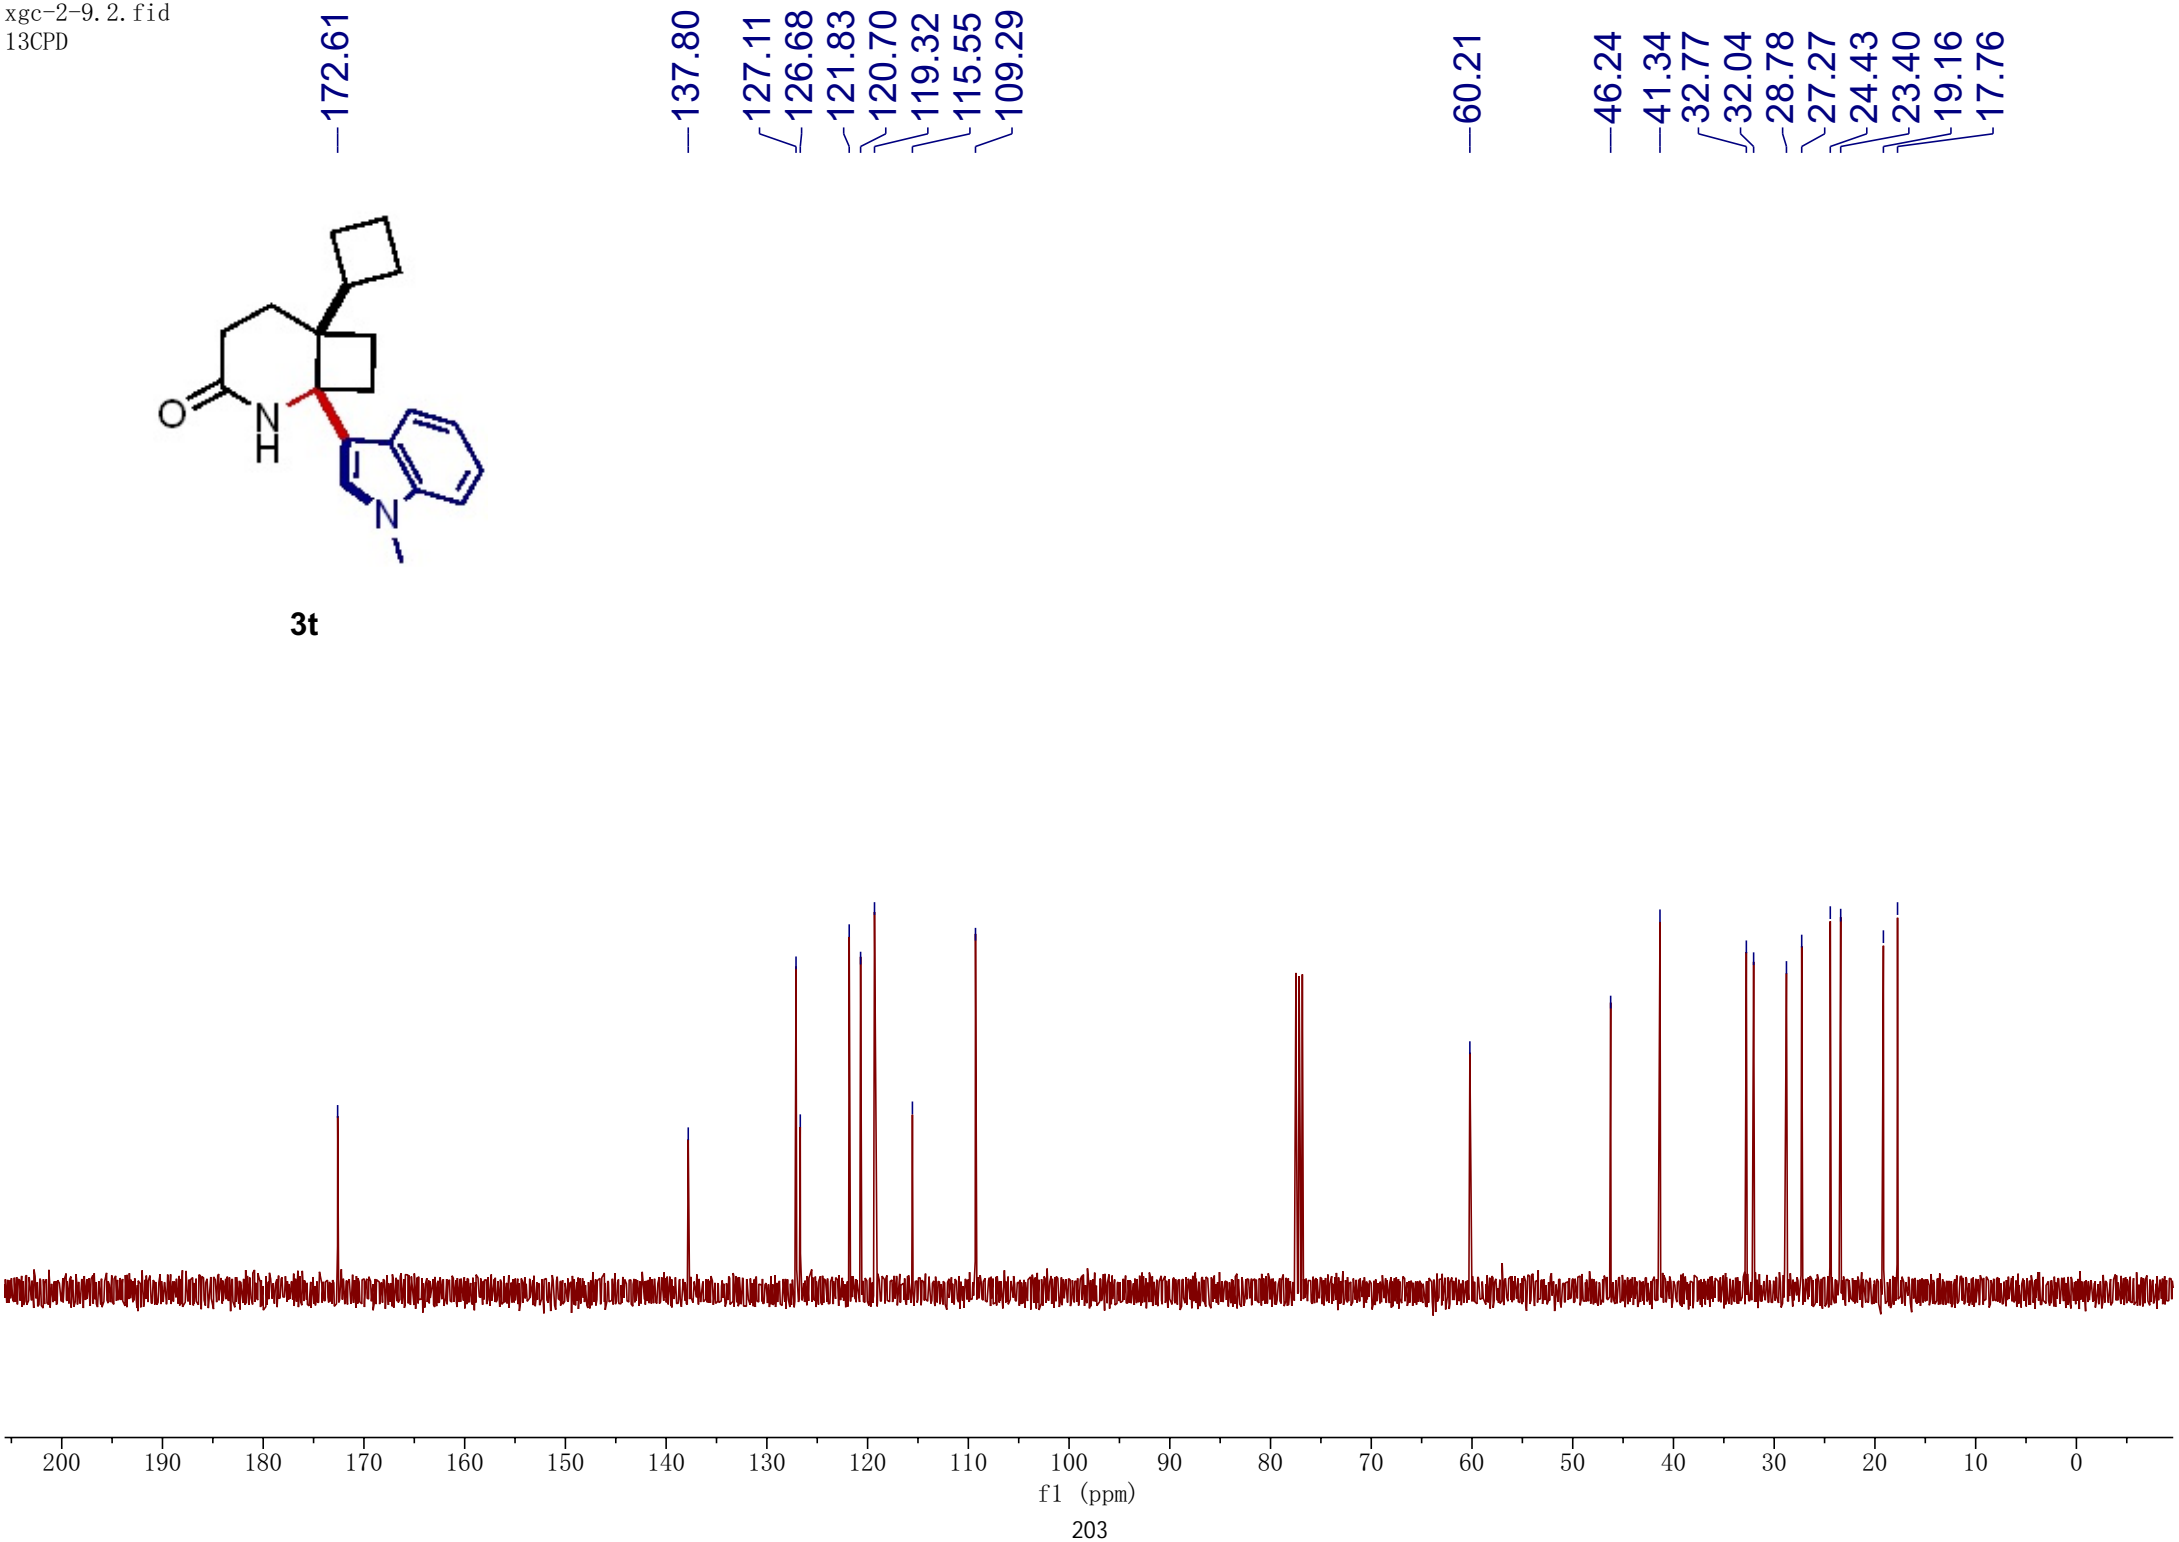

xgq-2-2-1-1.fid  
PRBON

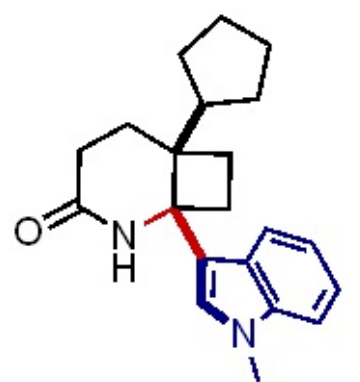

3u

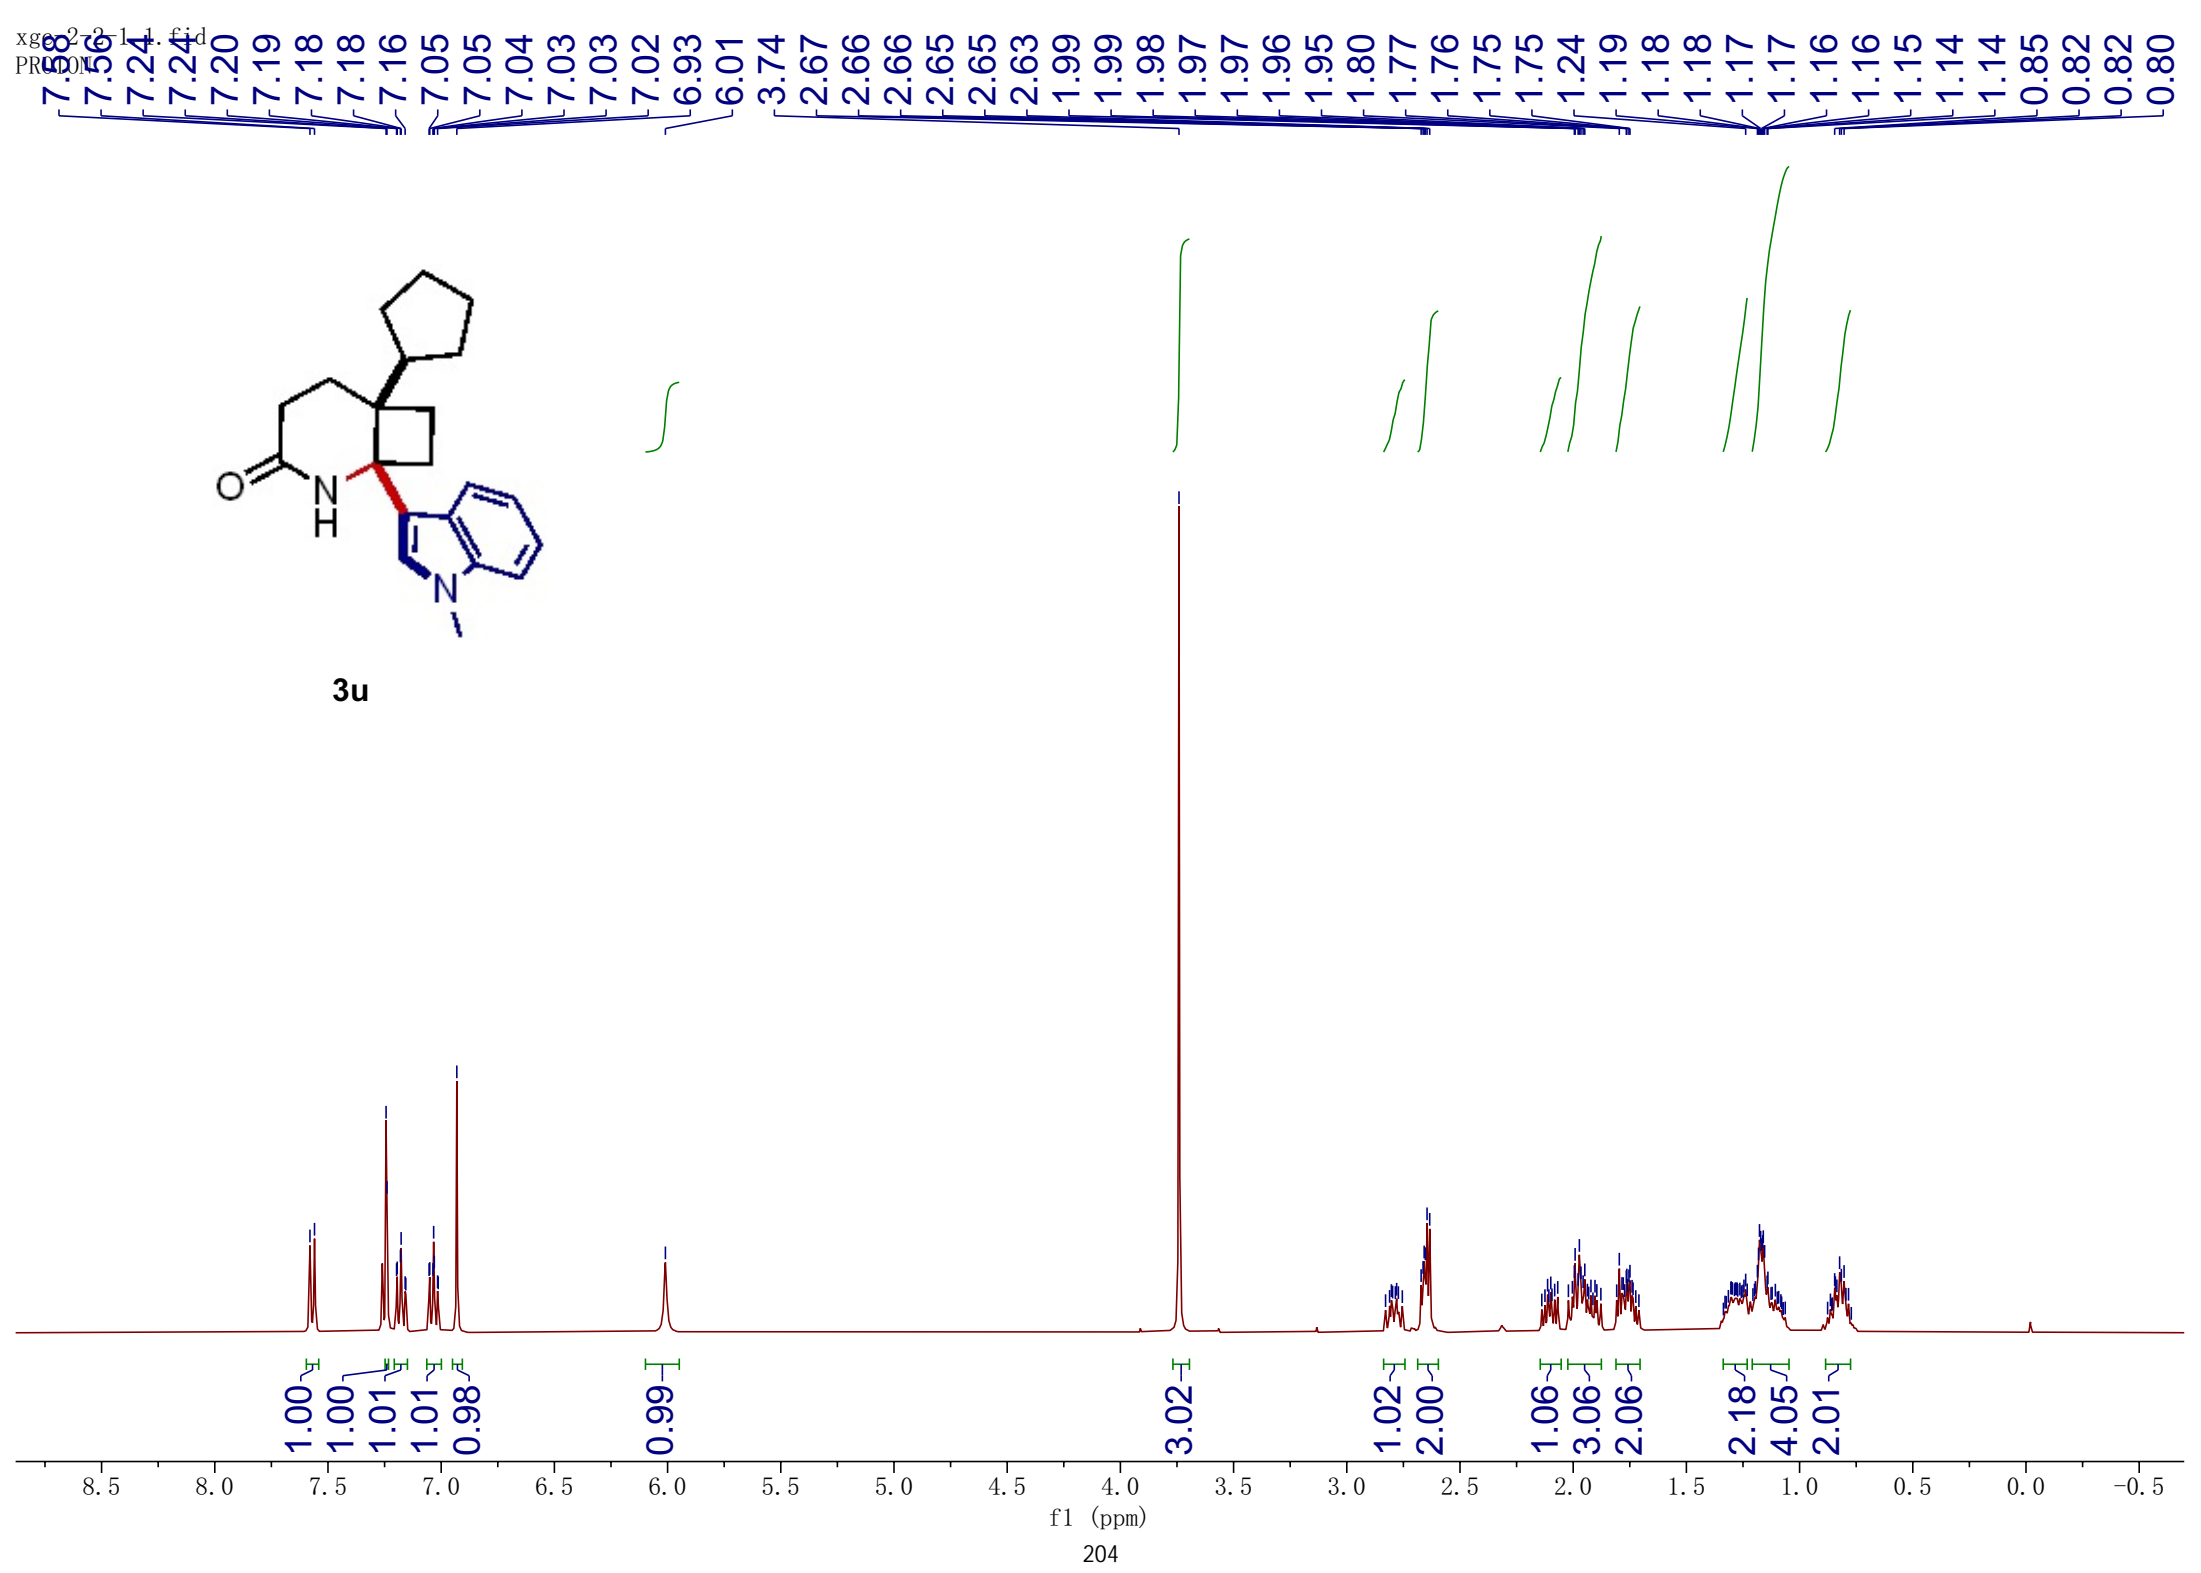

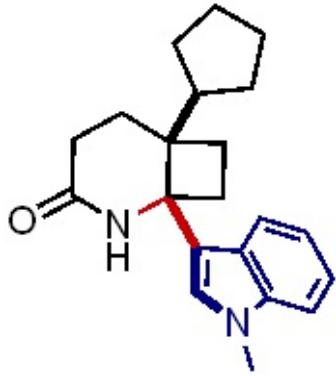

3u

-172.82

-137.76

127.53

126.64

121.85

121.03

119.41

116.50

109.36

-61.67

48.27

45.32

32.91

32.87

29.18

27.82

27.63

26.08

25.81

21.93

190 180 170 160 150 140 130 120 110 100 90 80 70 60 50 40 30 20 10 0

f1 (ppm)

205

xgg-1-159-1-f1-1  
PR0000

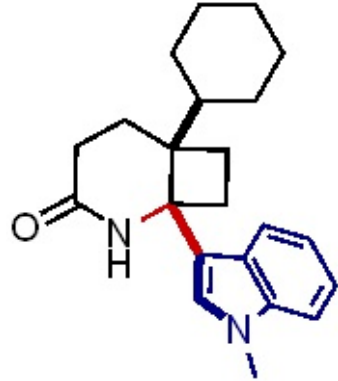

3v

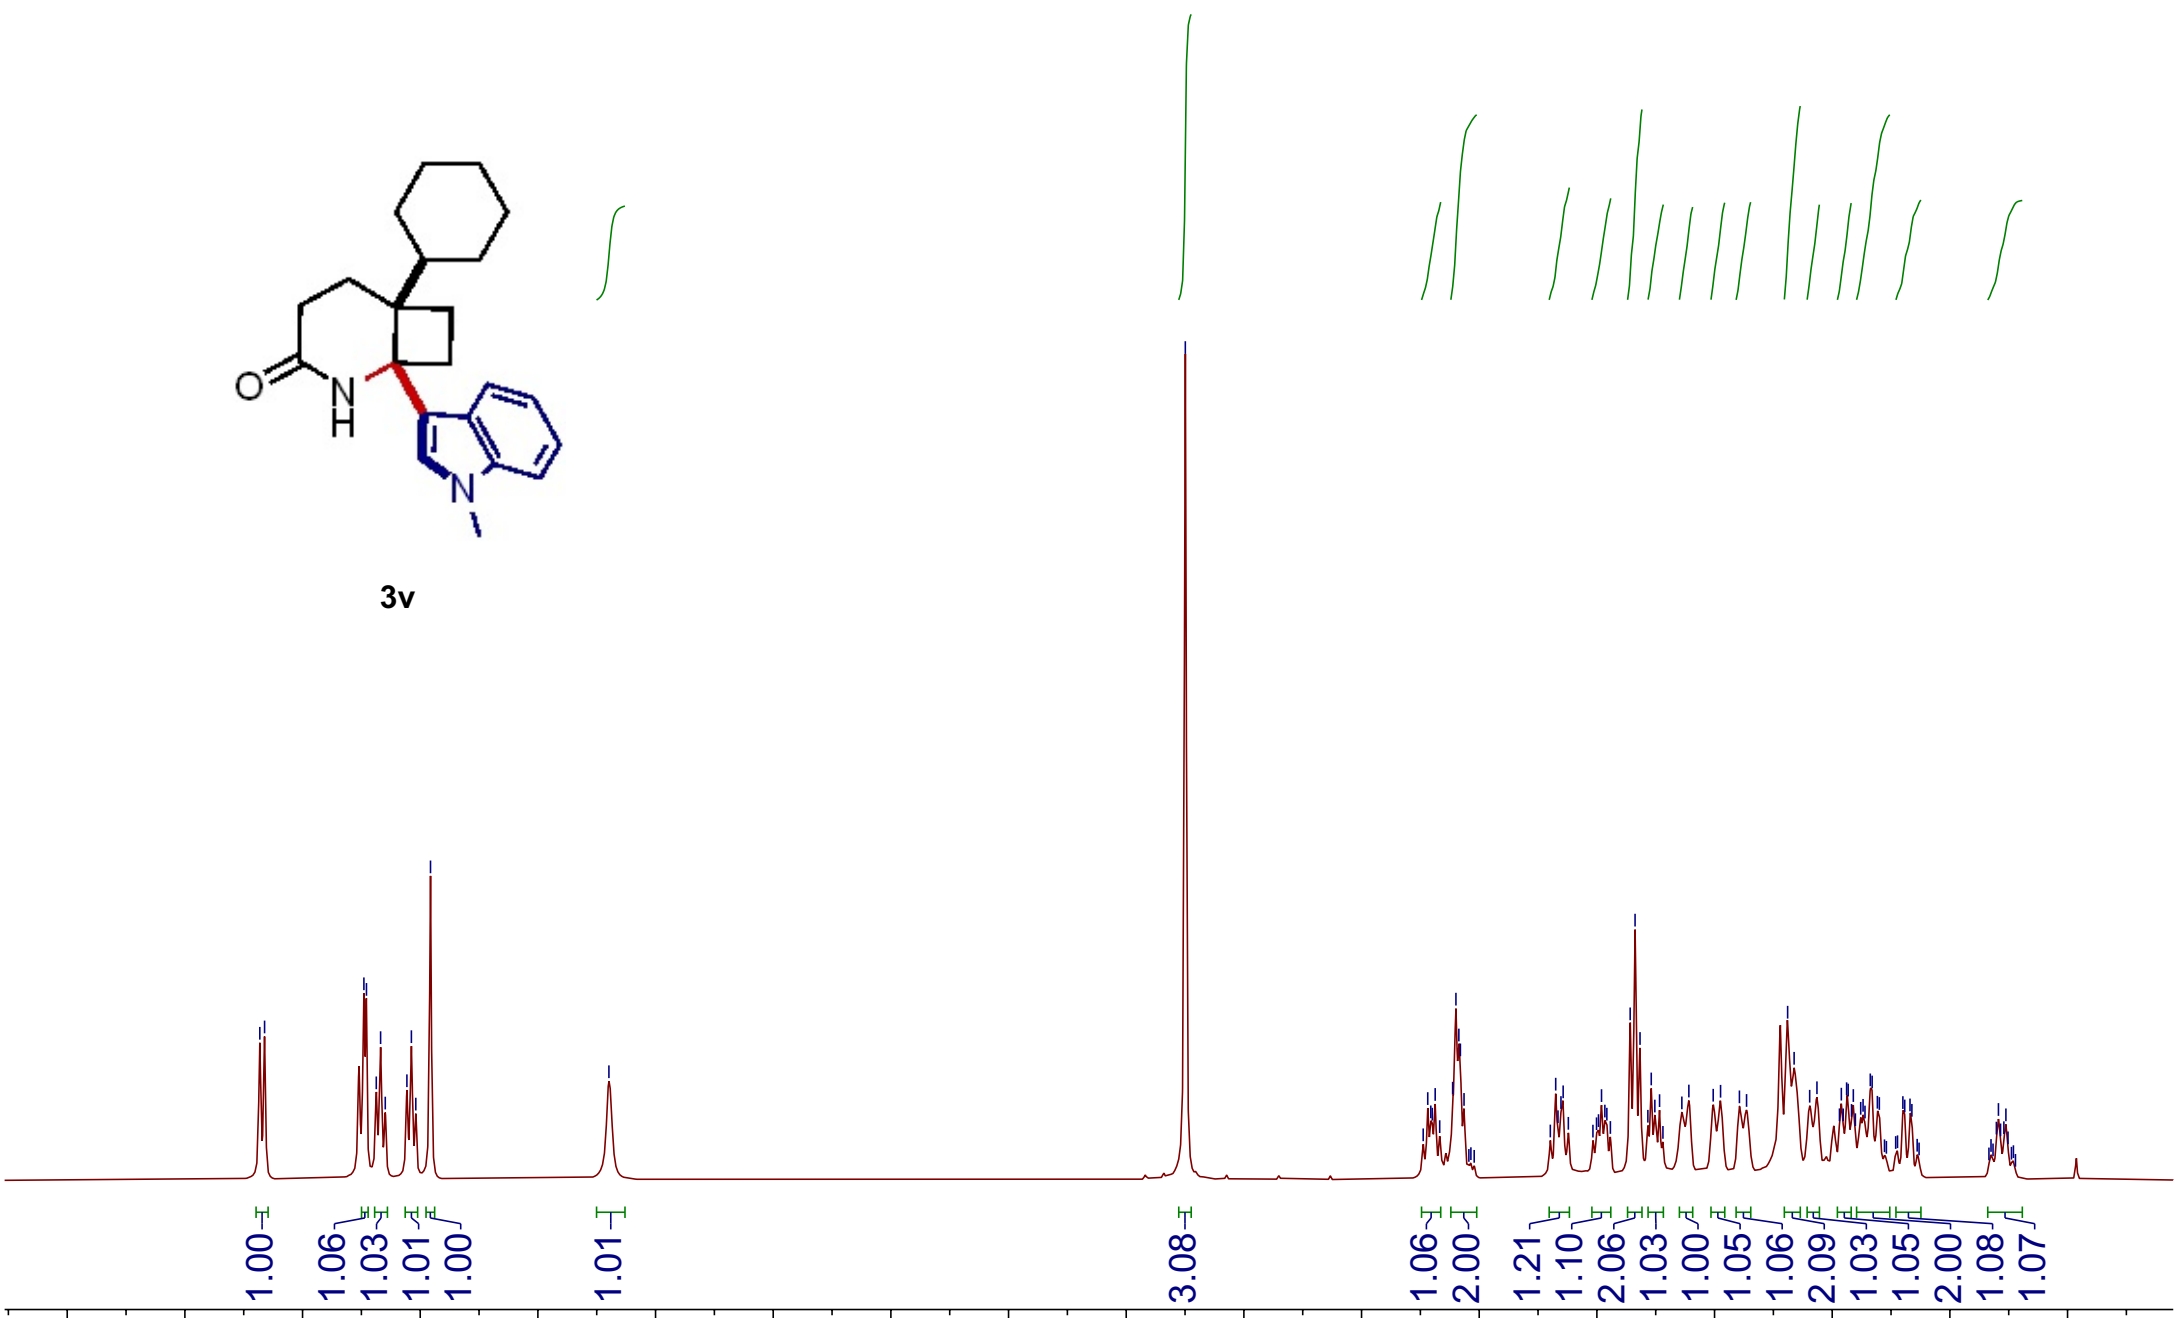

f1 (ppm)

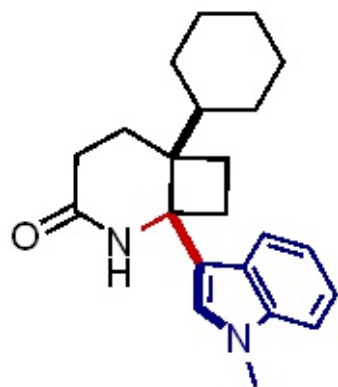

3v

-173.45

-137.60

127.56

126.58

121.83

121.16

119.61

115.90

109.52

-62.11

-48.42

-44.81

34.70

29.90

28.71

27.17

27.05

26.64

26.39

25.11

24.70

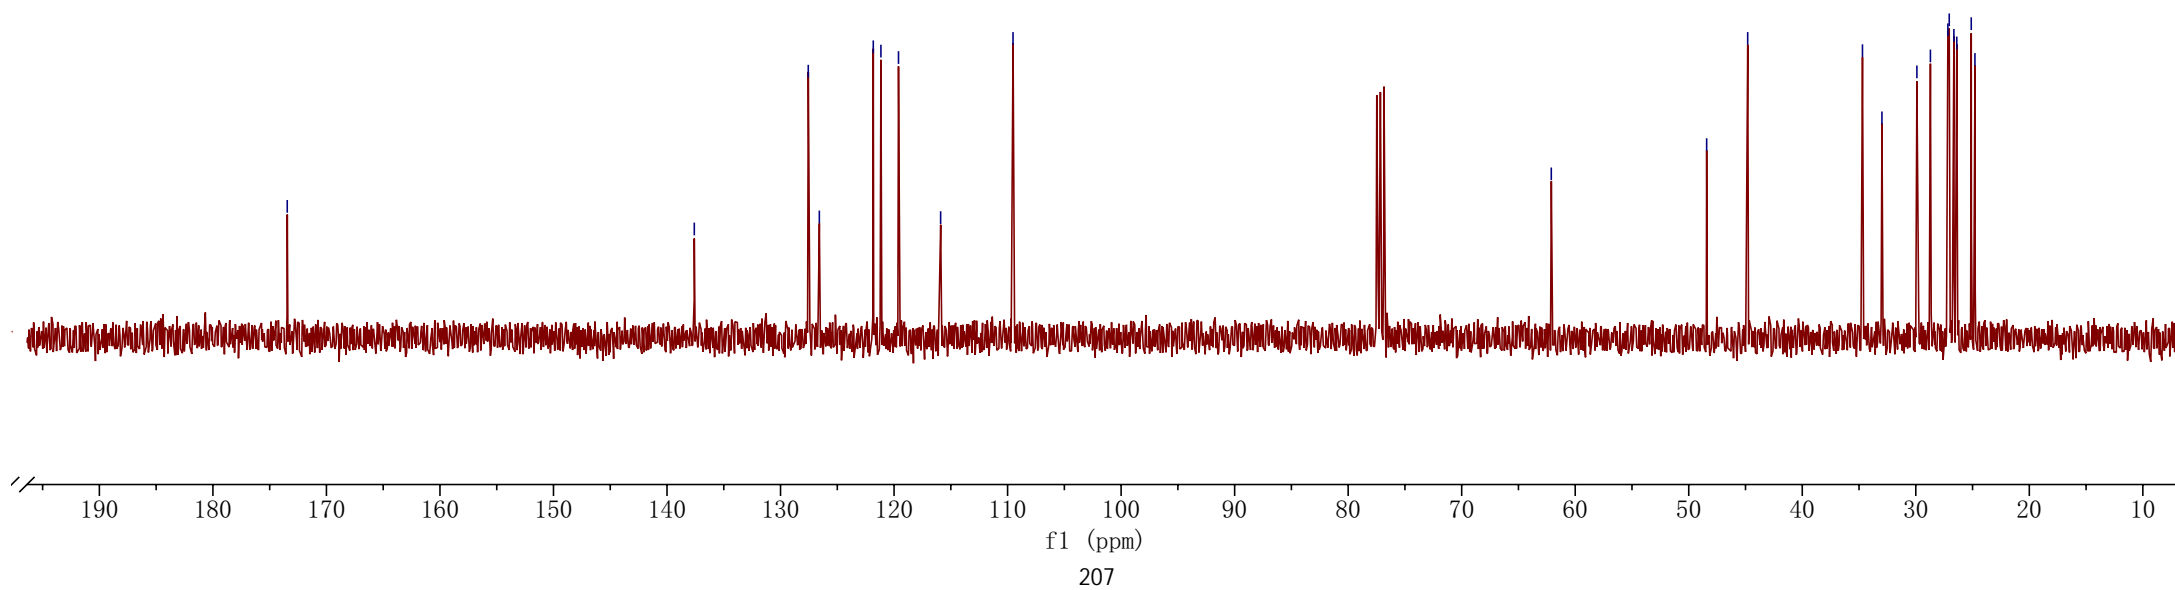

f1  
test

7.74 7.73 7.73 7.72 7.72 7.45 7.44 7.43 7.43 7.19 7.17 7.17 7.16 7.15 7.14 7.13 7.12 7.00 6.55 6.53 6.53 3.13 3.10 2.81 2.81 2.80 2.79 2.77 2.65 2.65 2.62 2.62 2.55 2.55 2.54 2.53 2.52 2.51 2.38 2.37 2.36 2.33 2.33 2.31 2.28 2.19 2.18 2.17 2.16 2.13 1.81

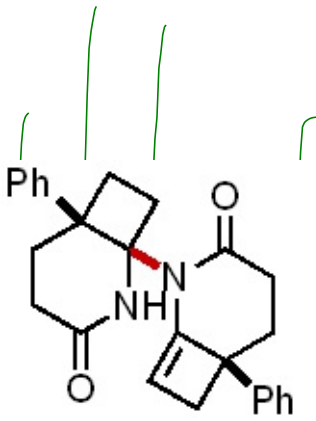

4a

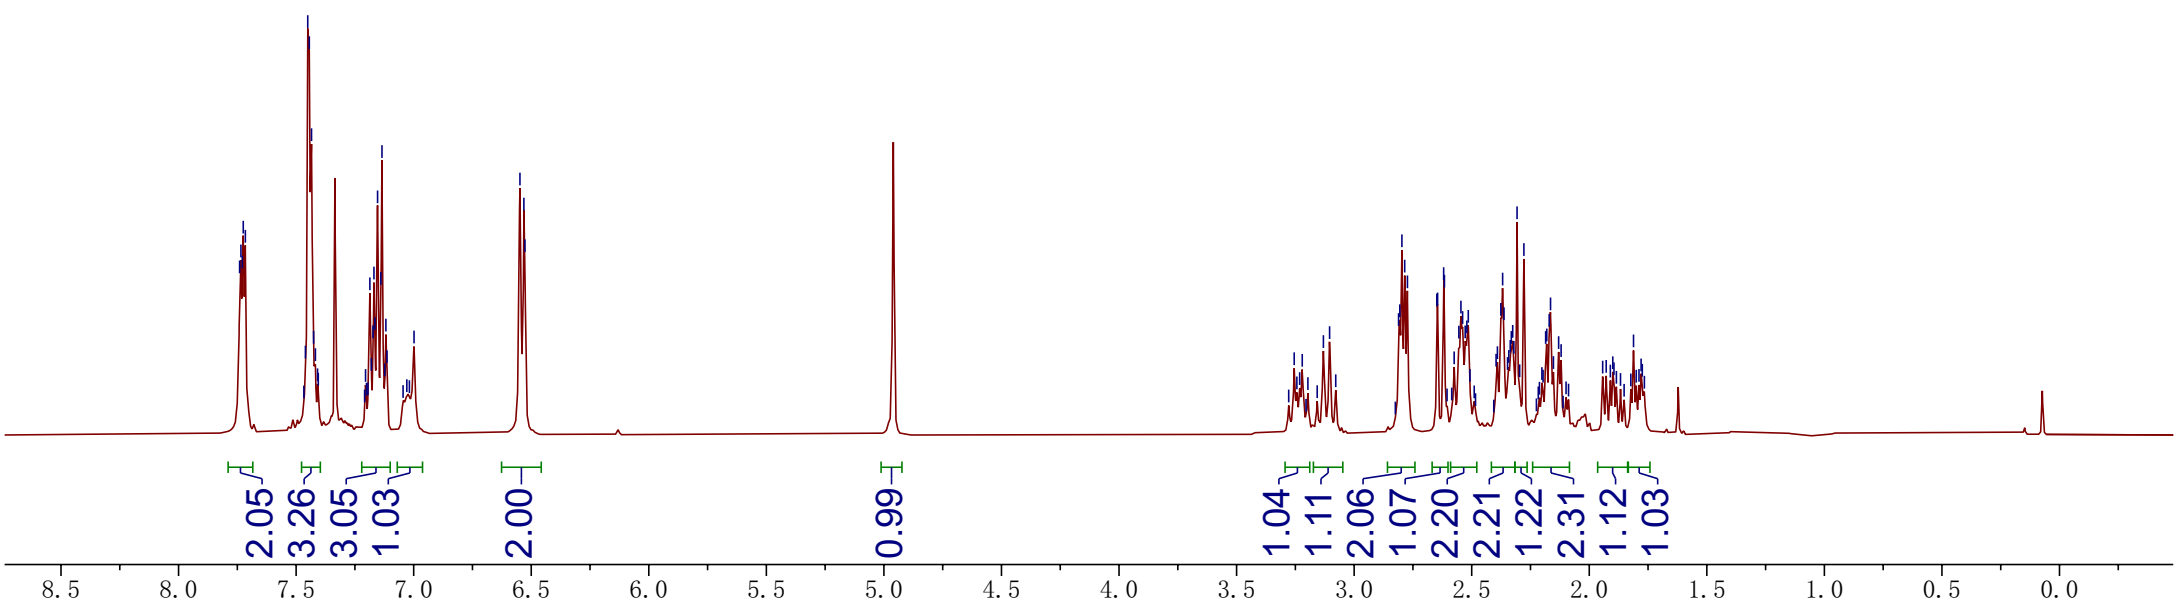

171.76  
169.46

142.86  
141.19  
140.60  
128.42  
127.58  
127.56  
126.20  
125.72

103.96

75.52

50.25  
49.93  
40.95  
33.60  
32.35  
32.17  
28.38  
27.62  
22.43

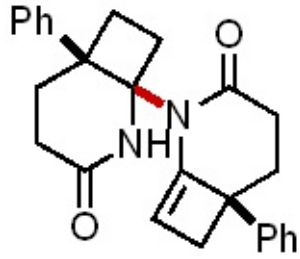

4a

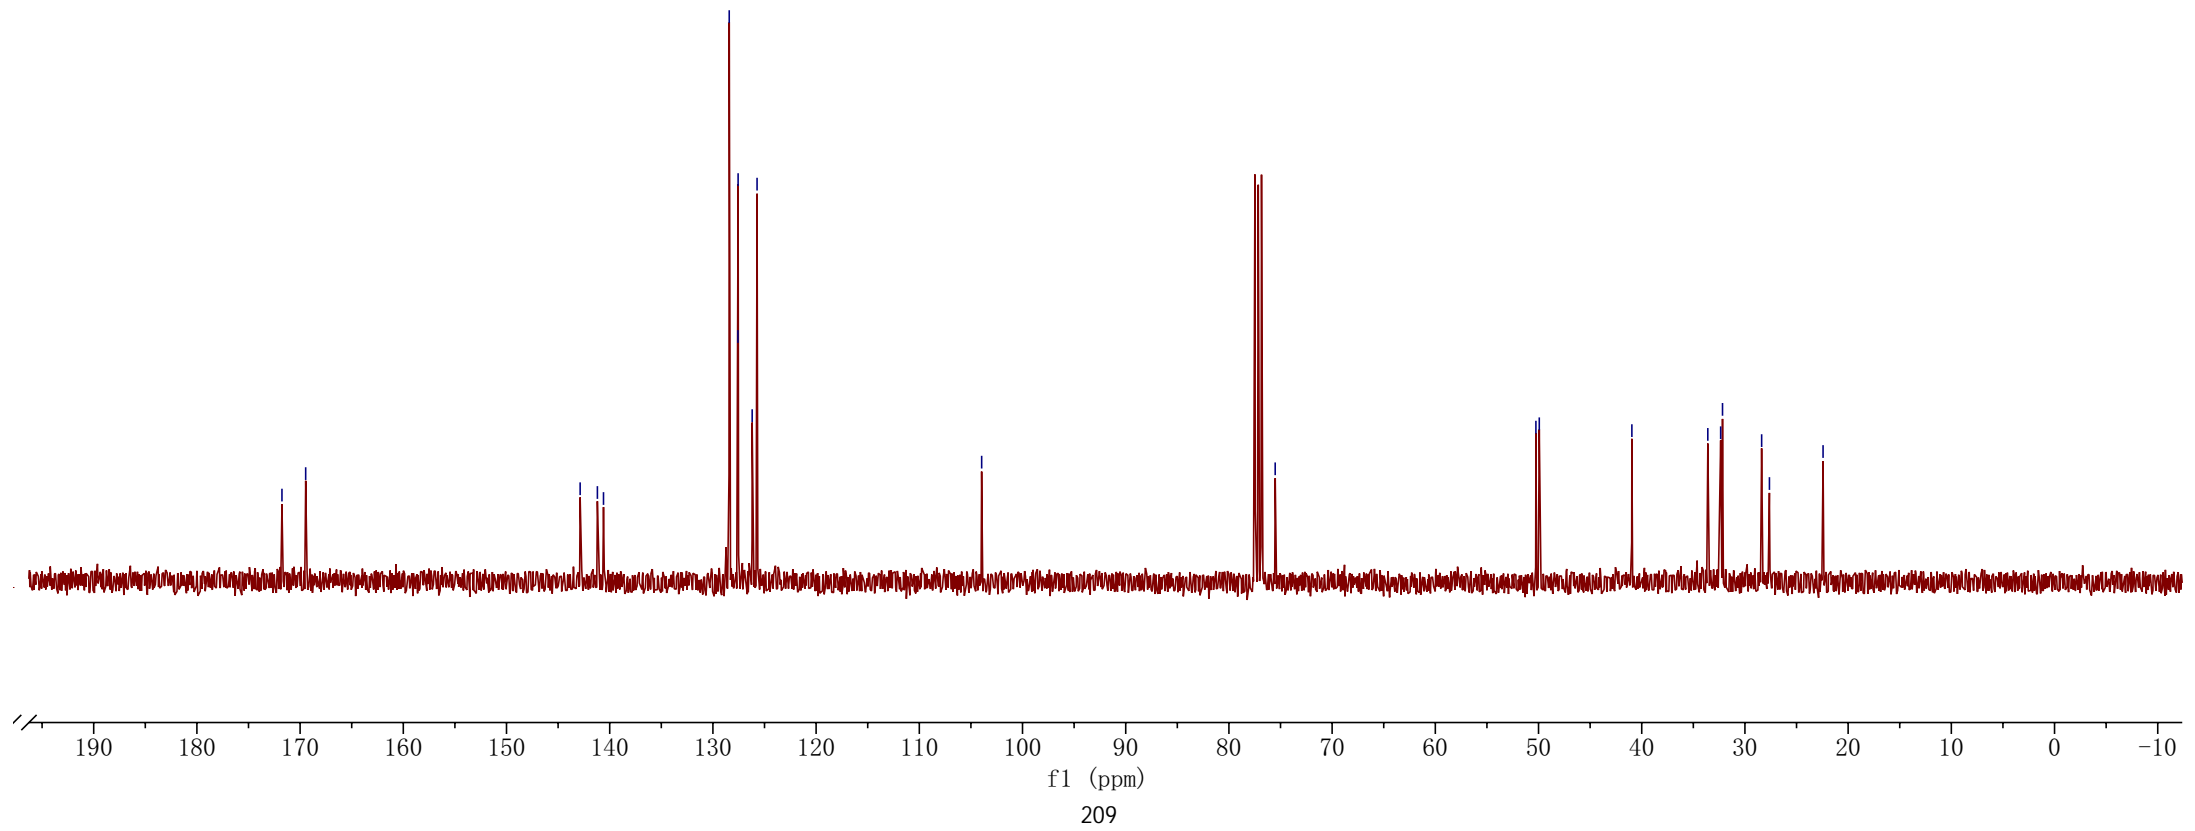

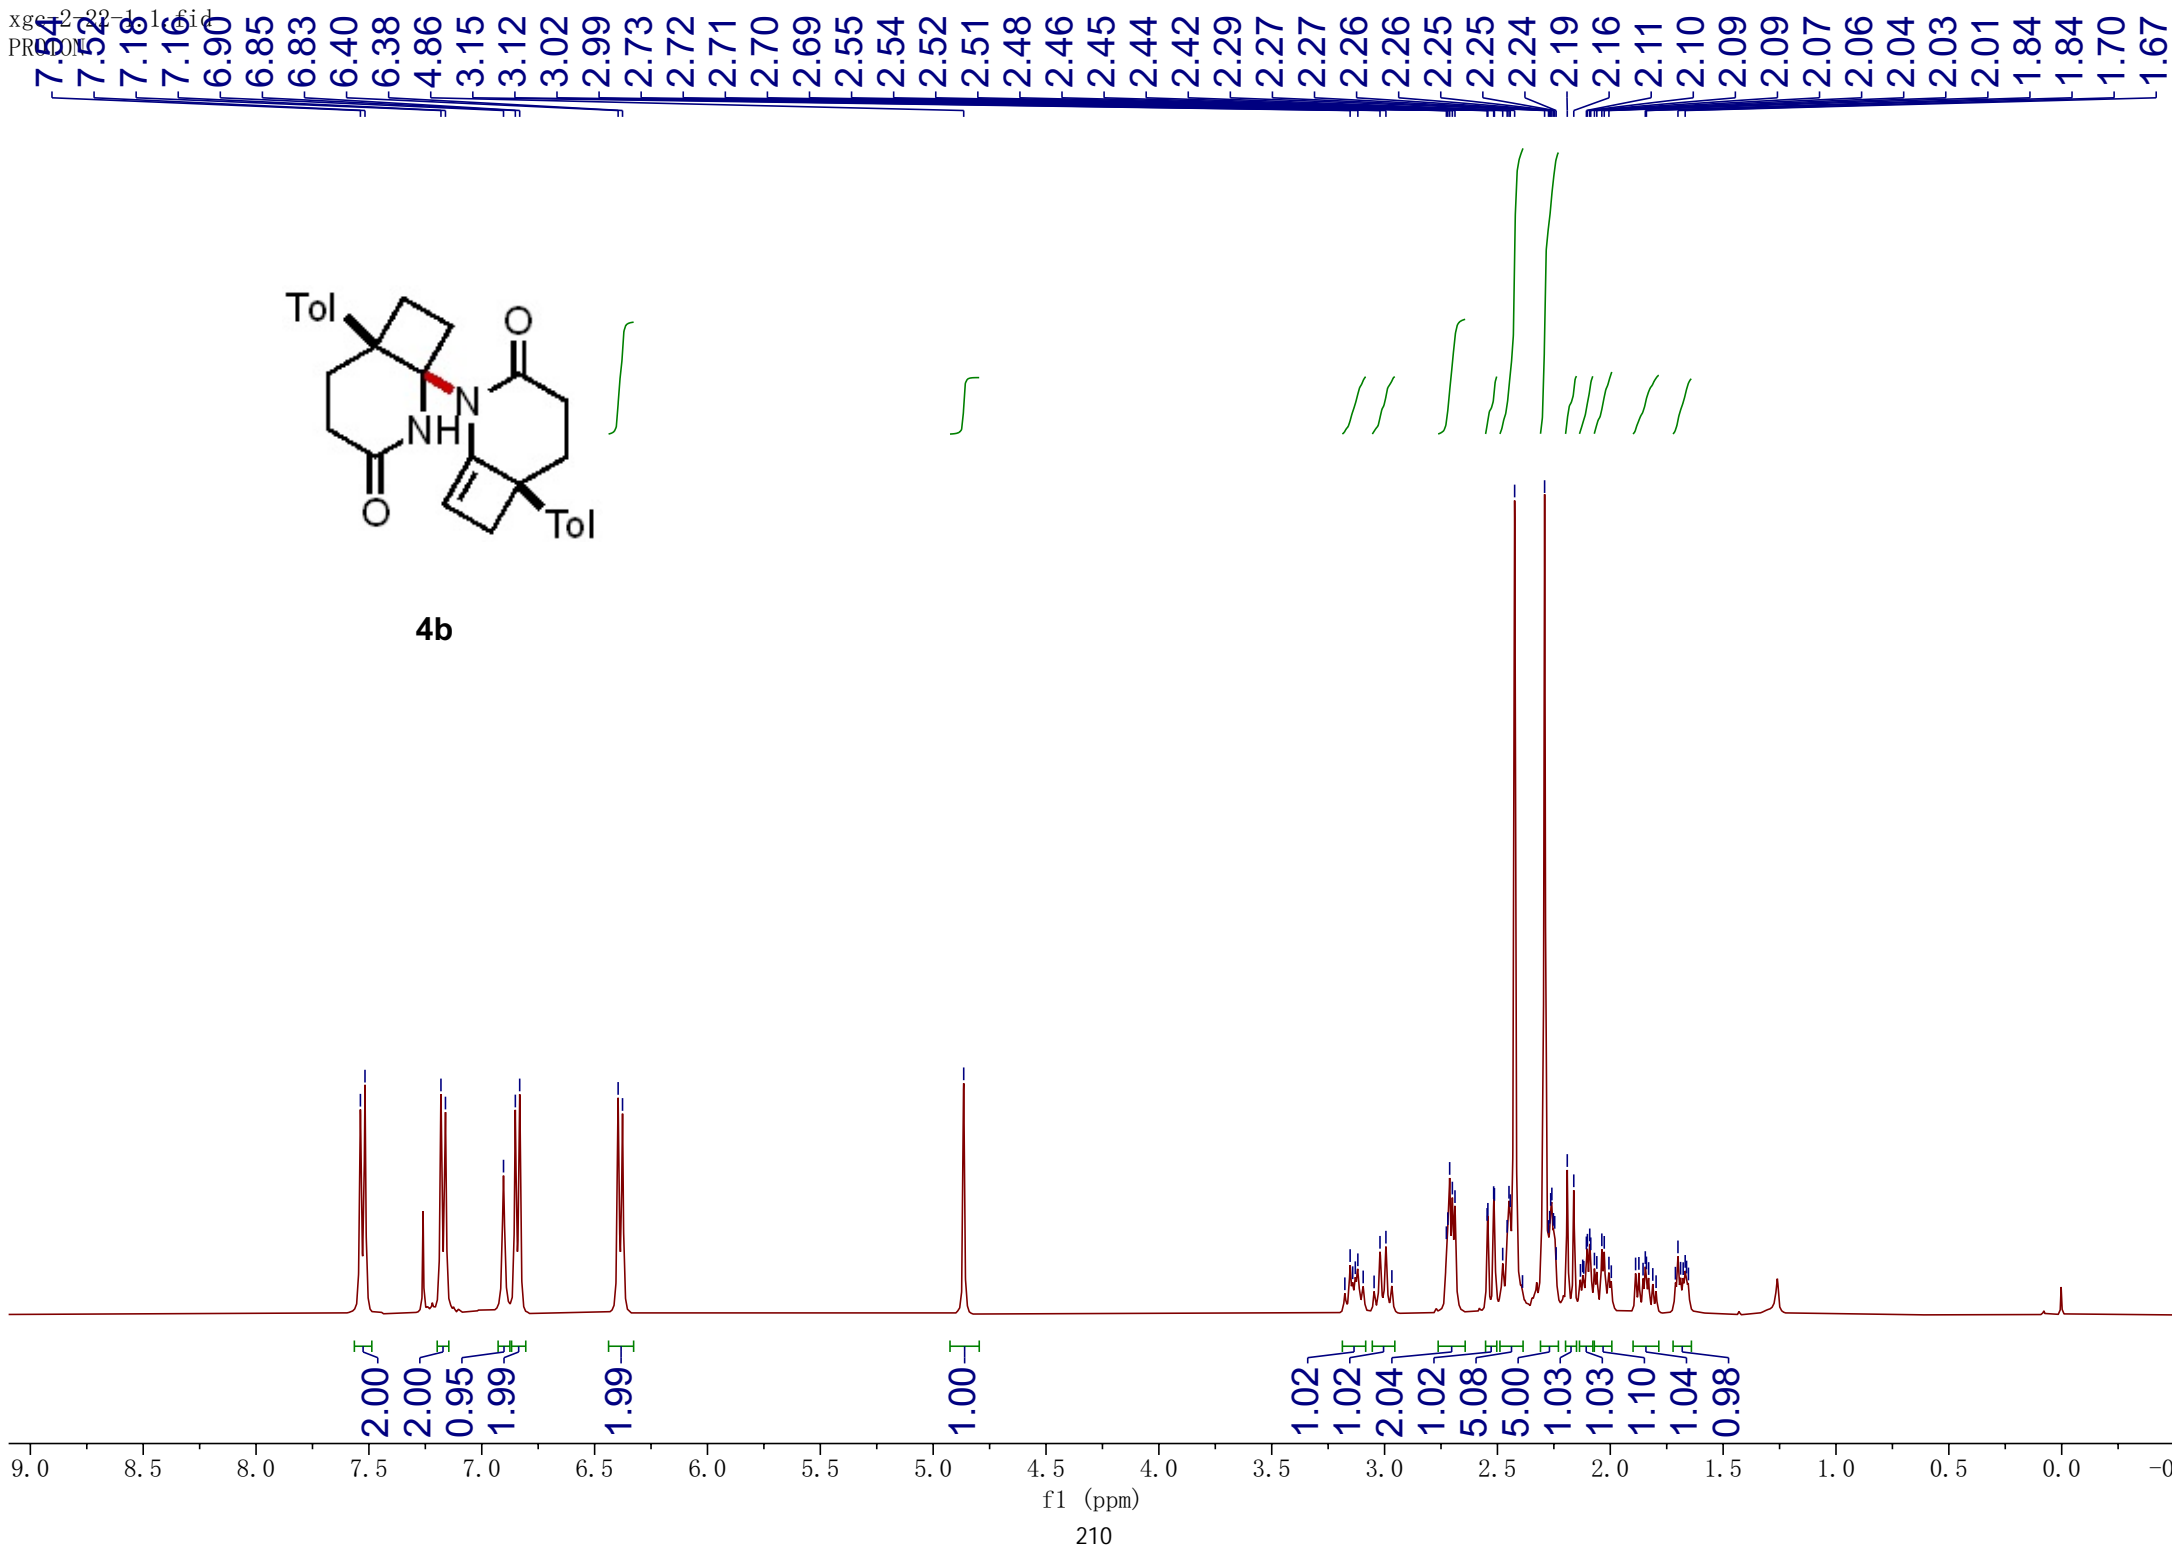

171.78  
169.47

141.32  
139.88  
137.57  
136.87  
135.59  
129.20  
128.90  
127.46  
125.68

103.77

75.42

49.90  
49.65  
41.03  
33.49  
32.25  
28.40  
27.78  
22.29  
21.14

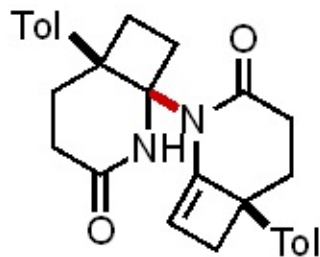

4b

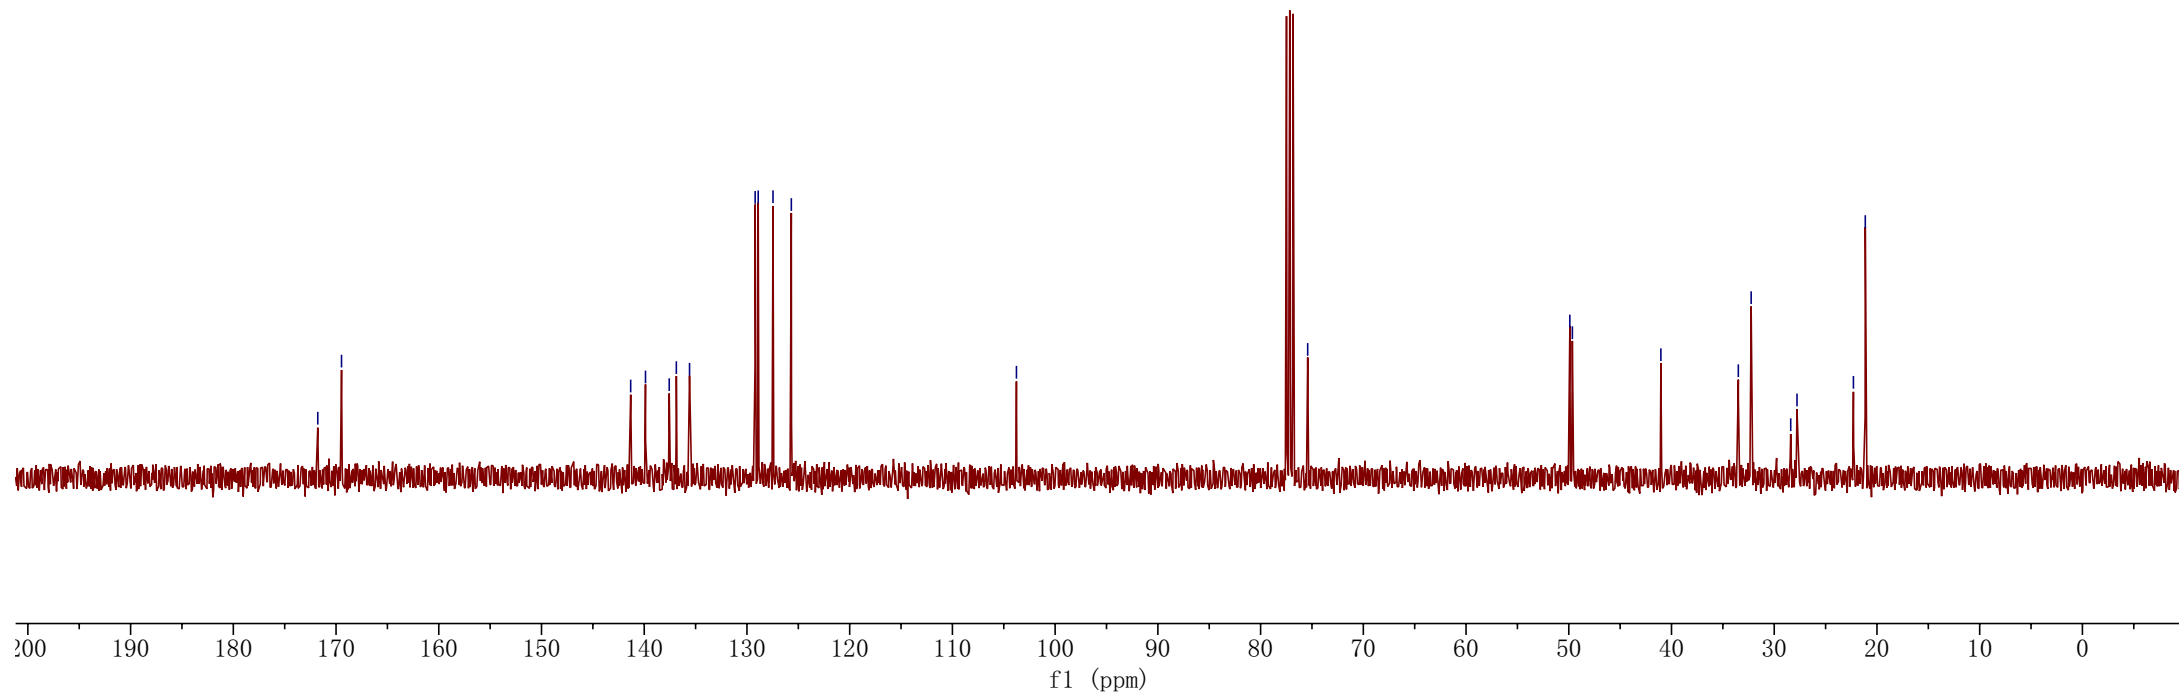

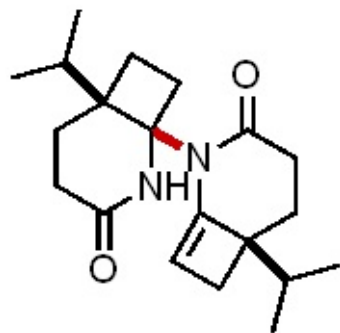

4c

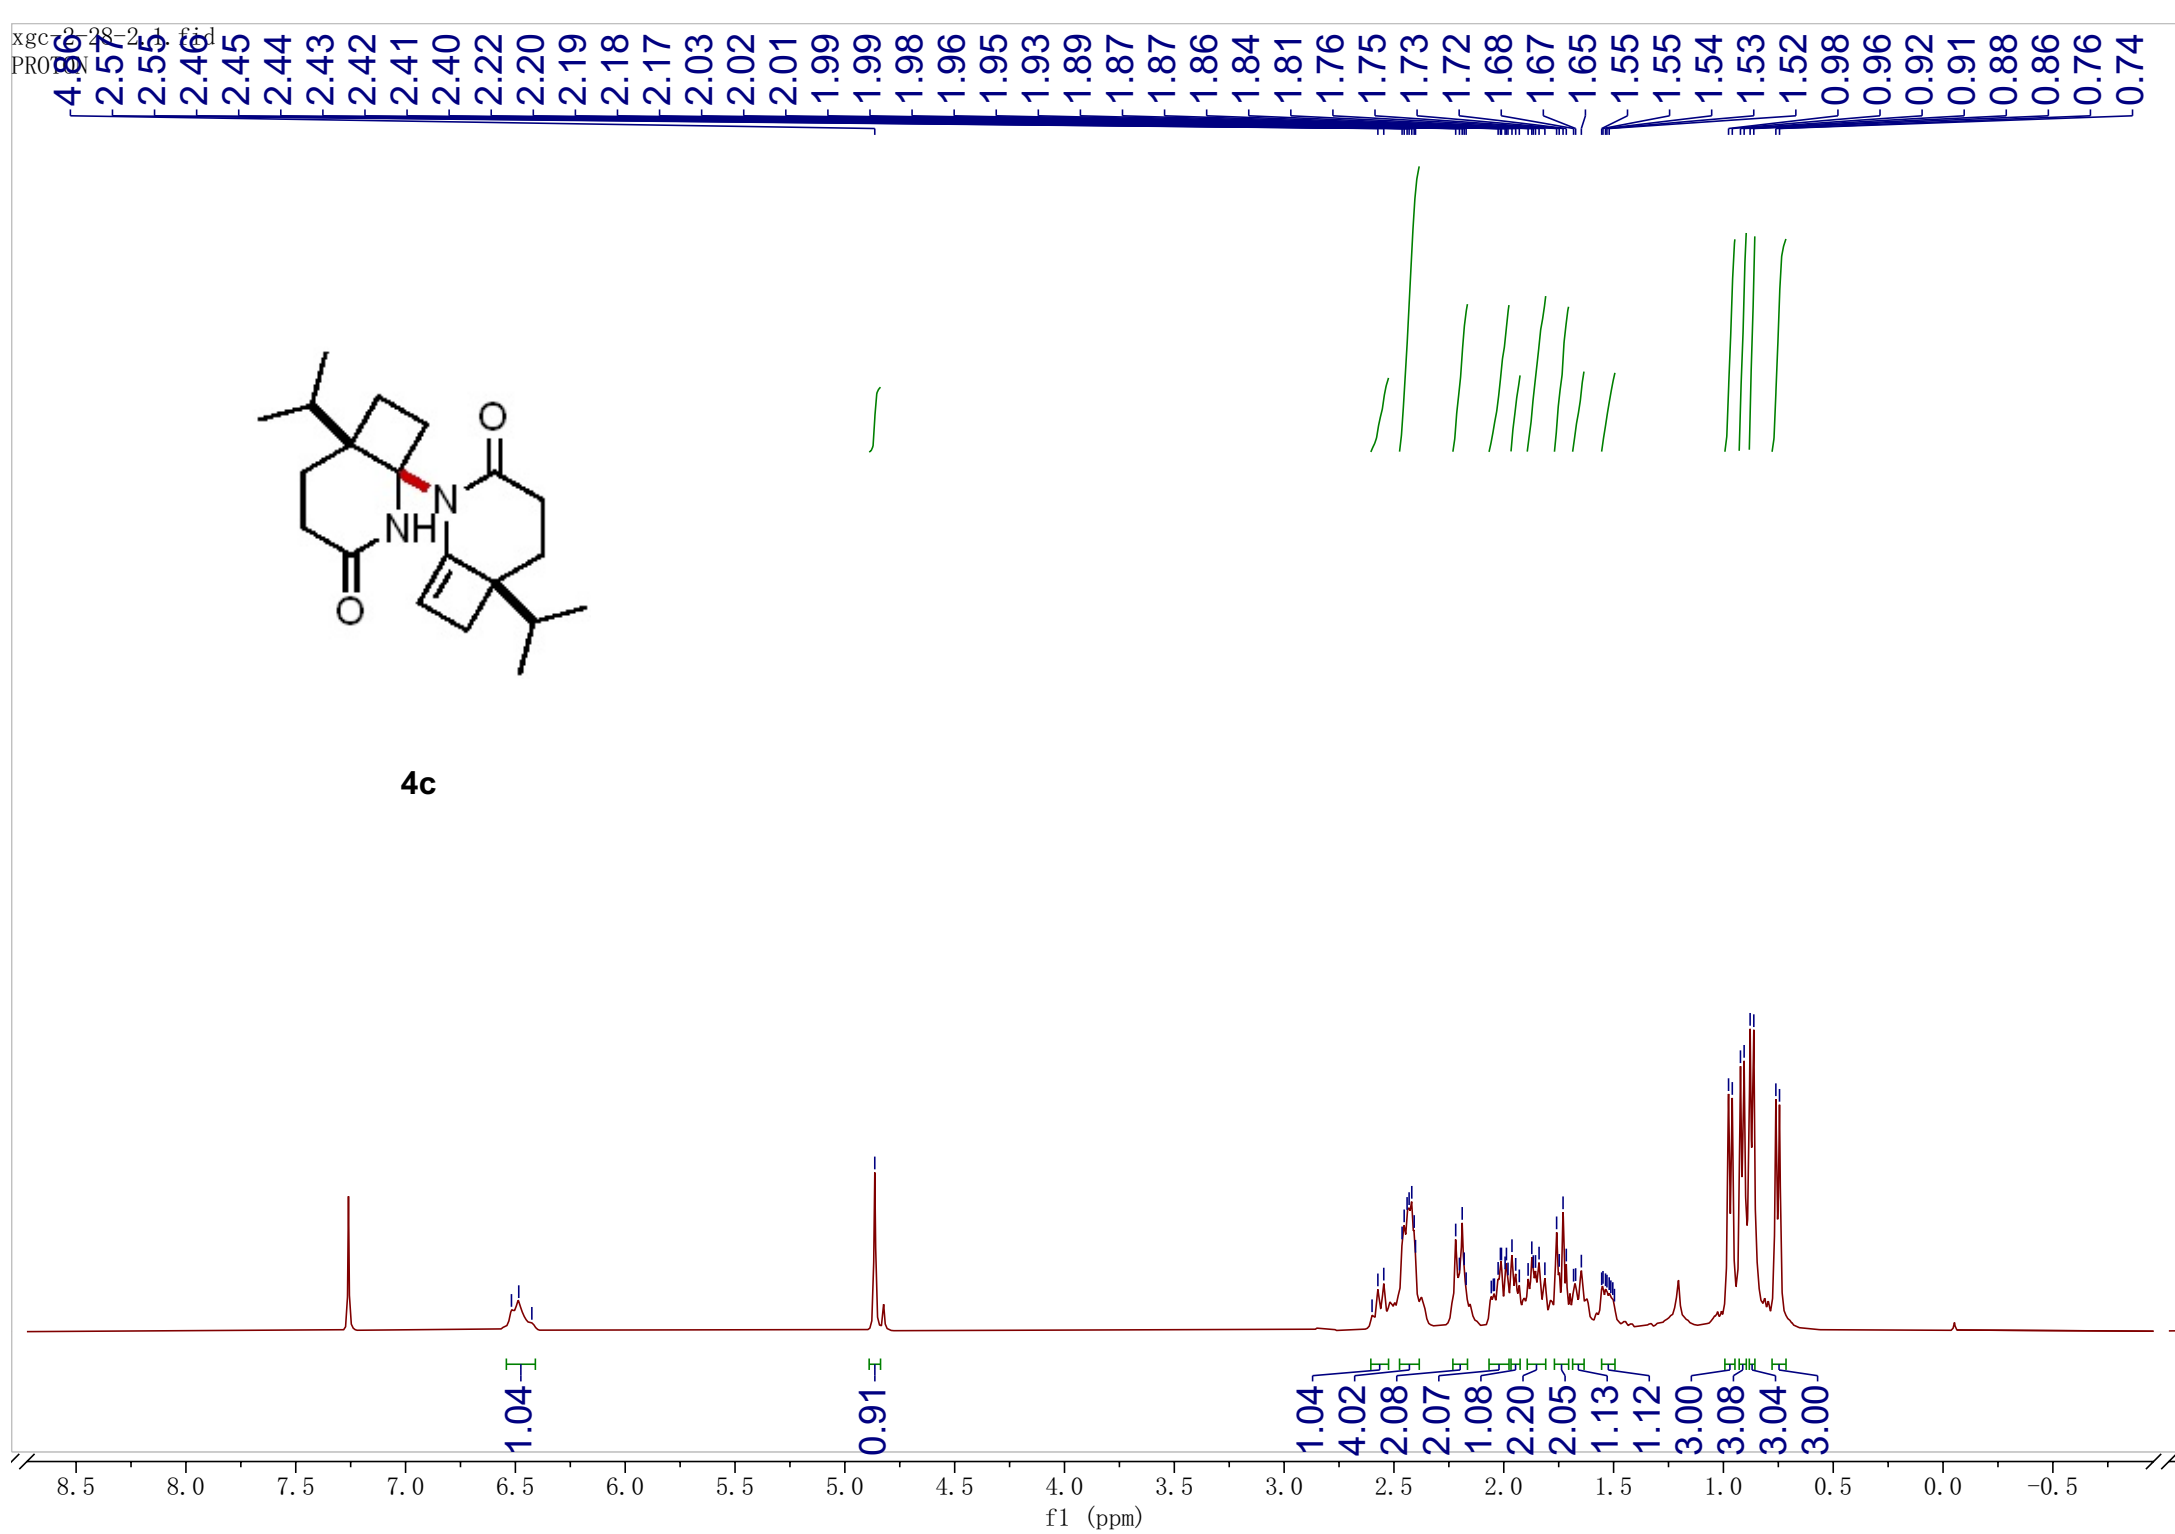

~171.75  
~169.99

—142.40

—105.02

—75.27

~49.64  
~48.31

31.78  
31.73  
31.17  
28.80  
27.71  
26.57  
23.86  
19.88  
18.25  
17.88  
17.55  
17.50

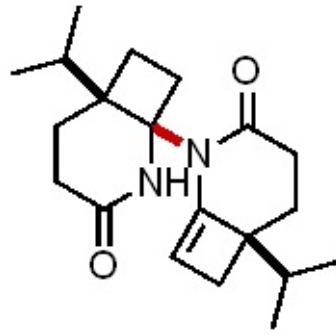

4c

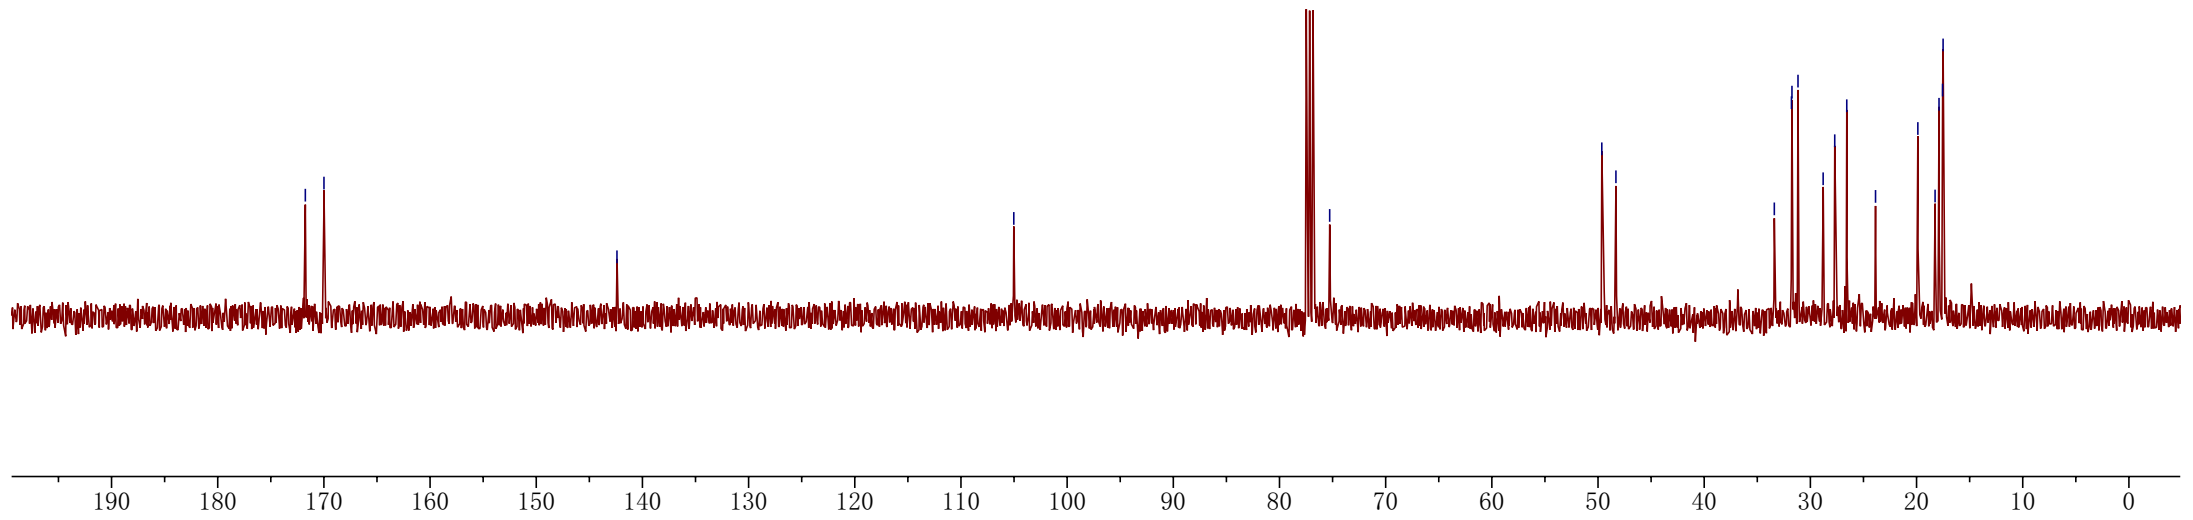

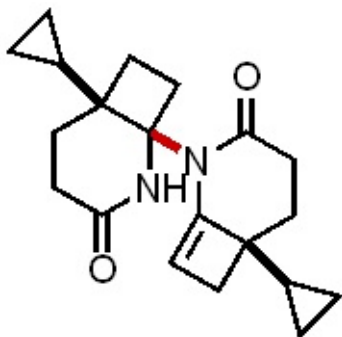

4d

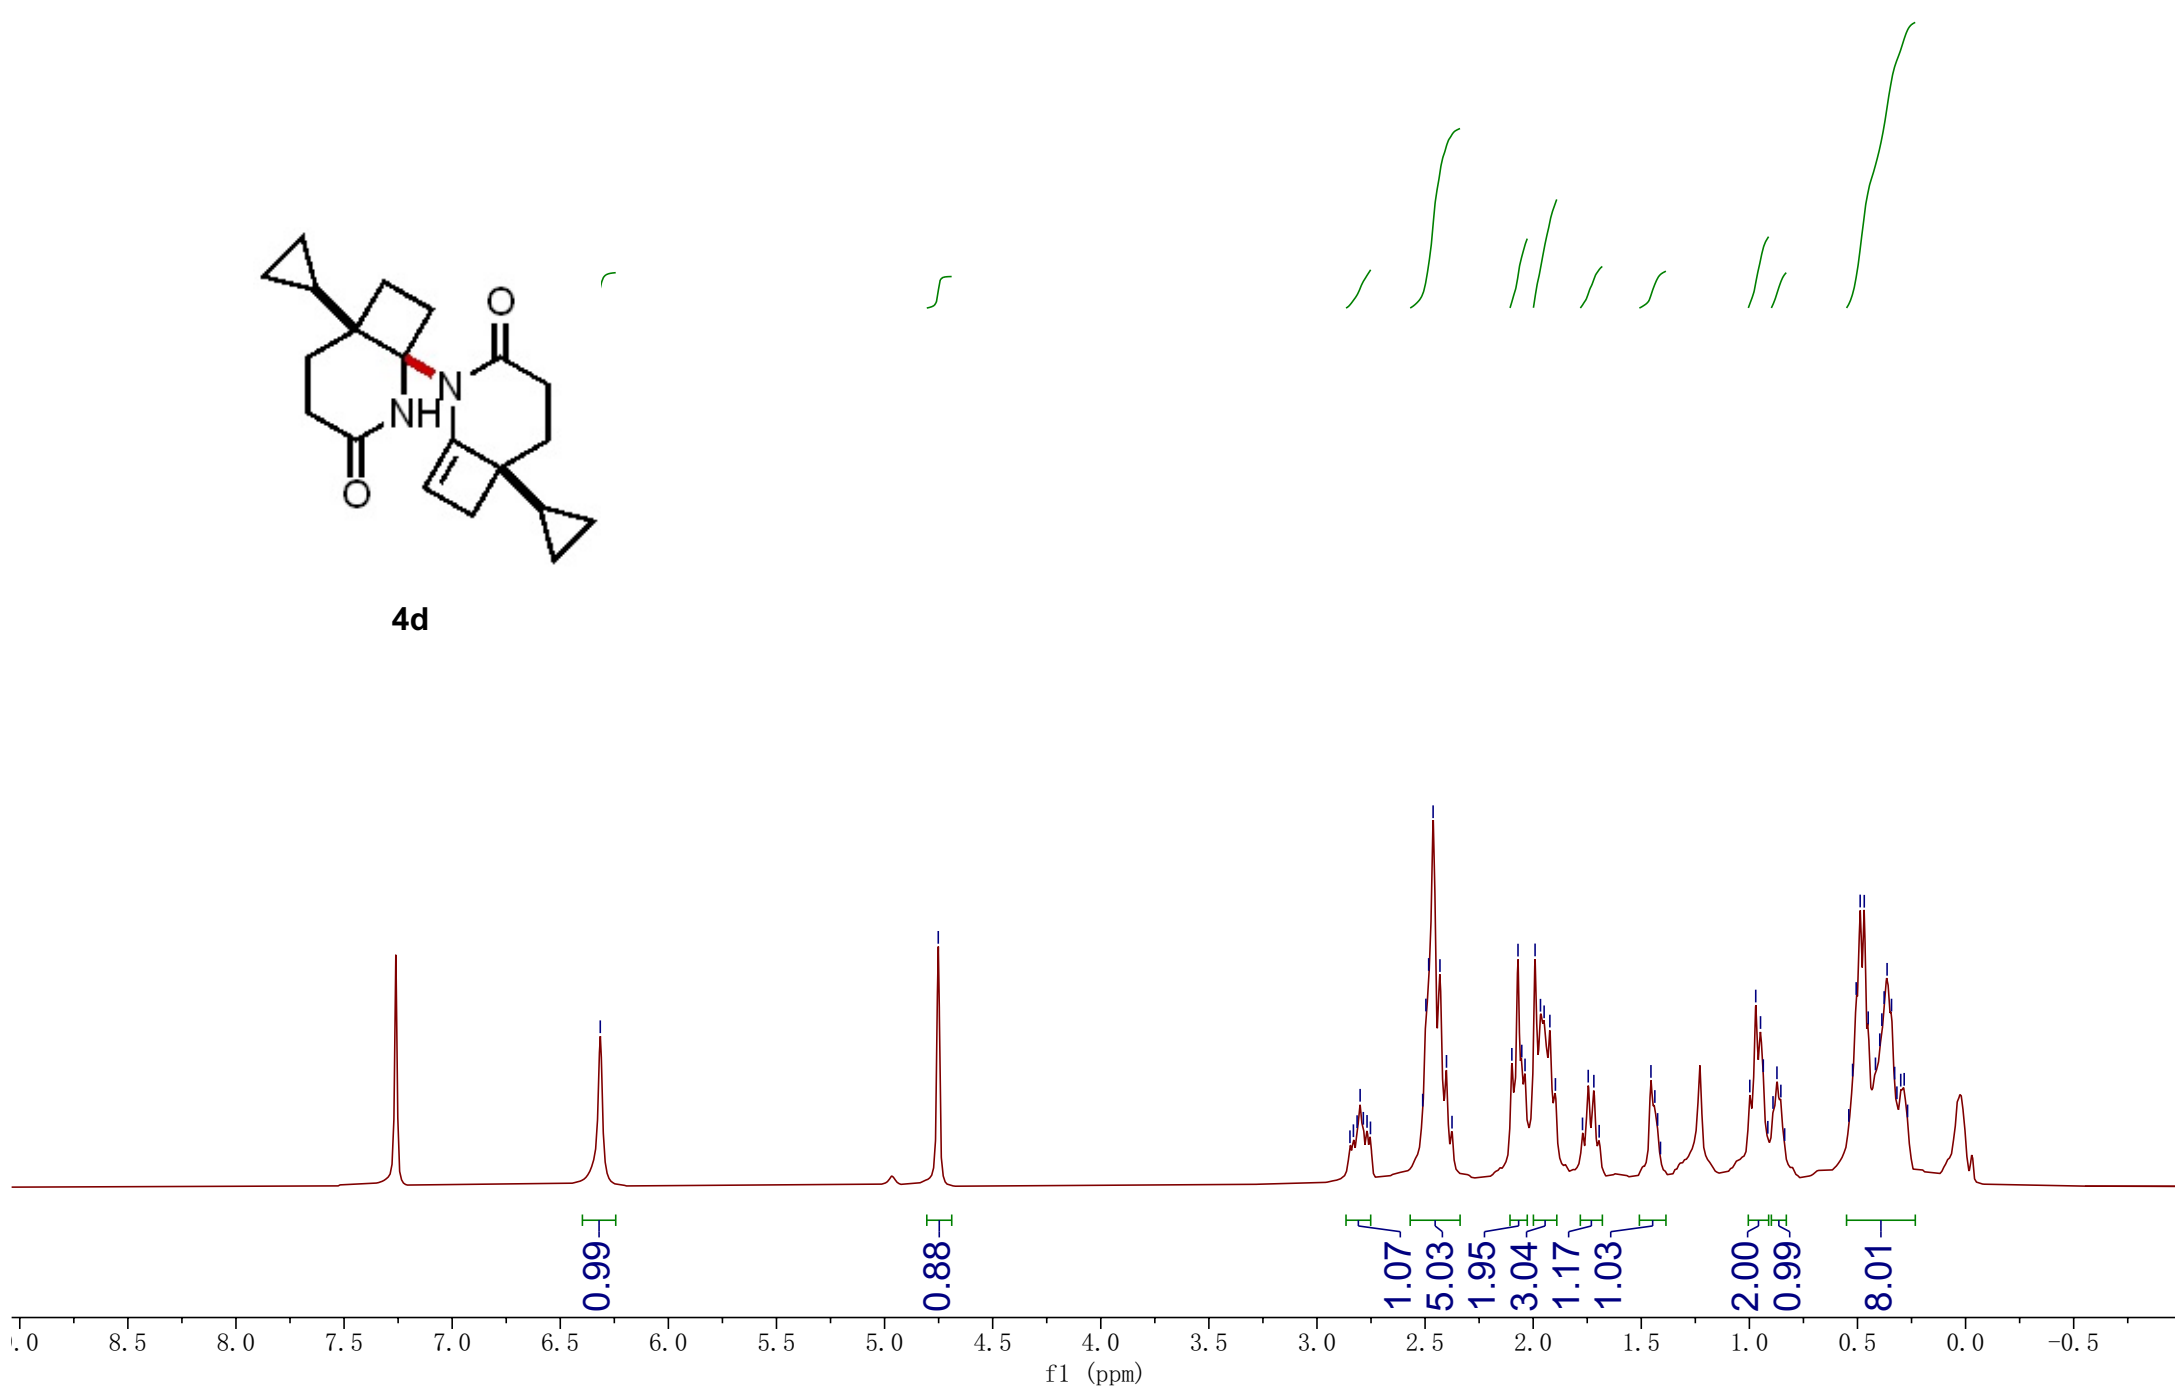

~171.85  
~170.01

-140.81

-104.10

-75.12

45.94  
44.83  
36.82  
32.83  
32.44  
31.82  
27.88  
27.45  
16.38  
15.42  
14.01  
3.87  
-2.52  
-0.04  
-0.44

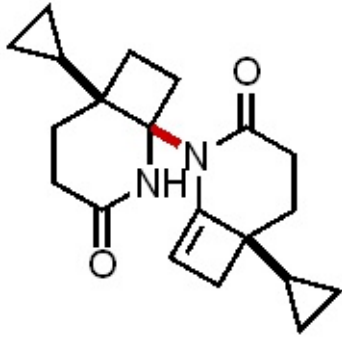

4d

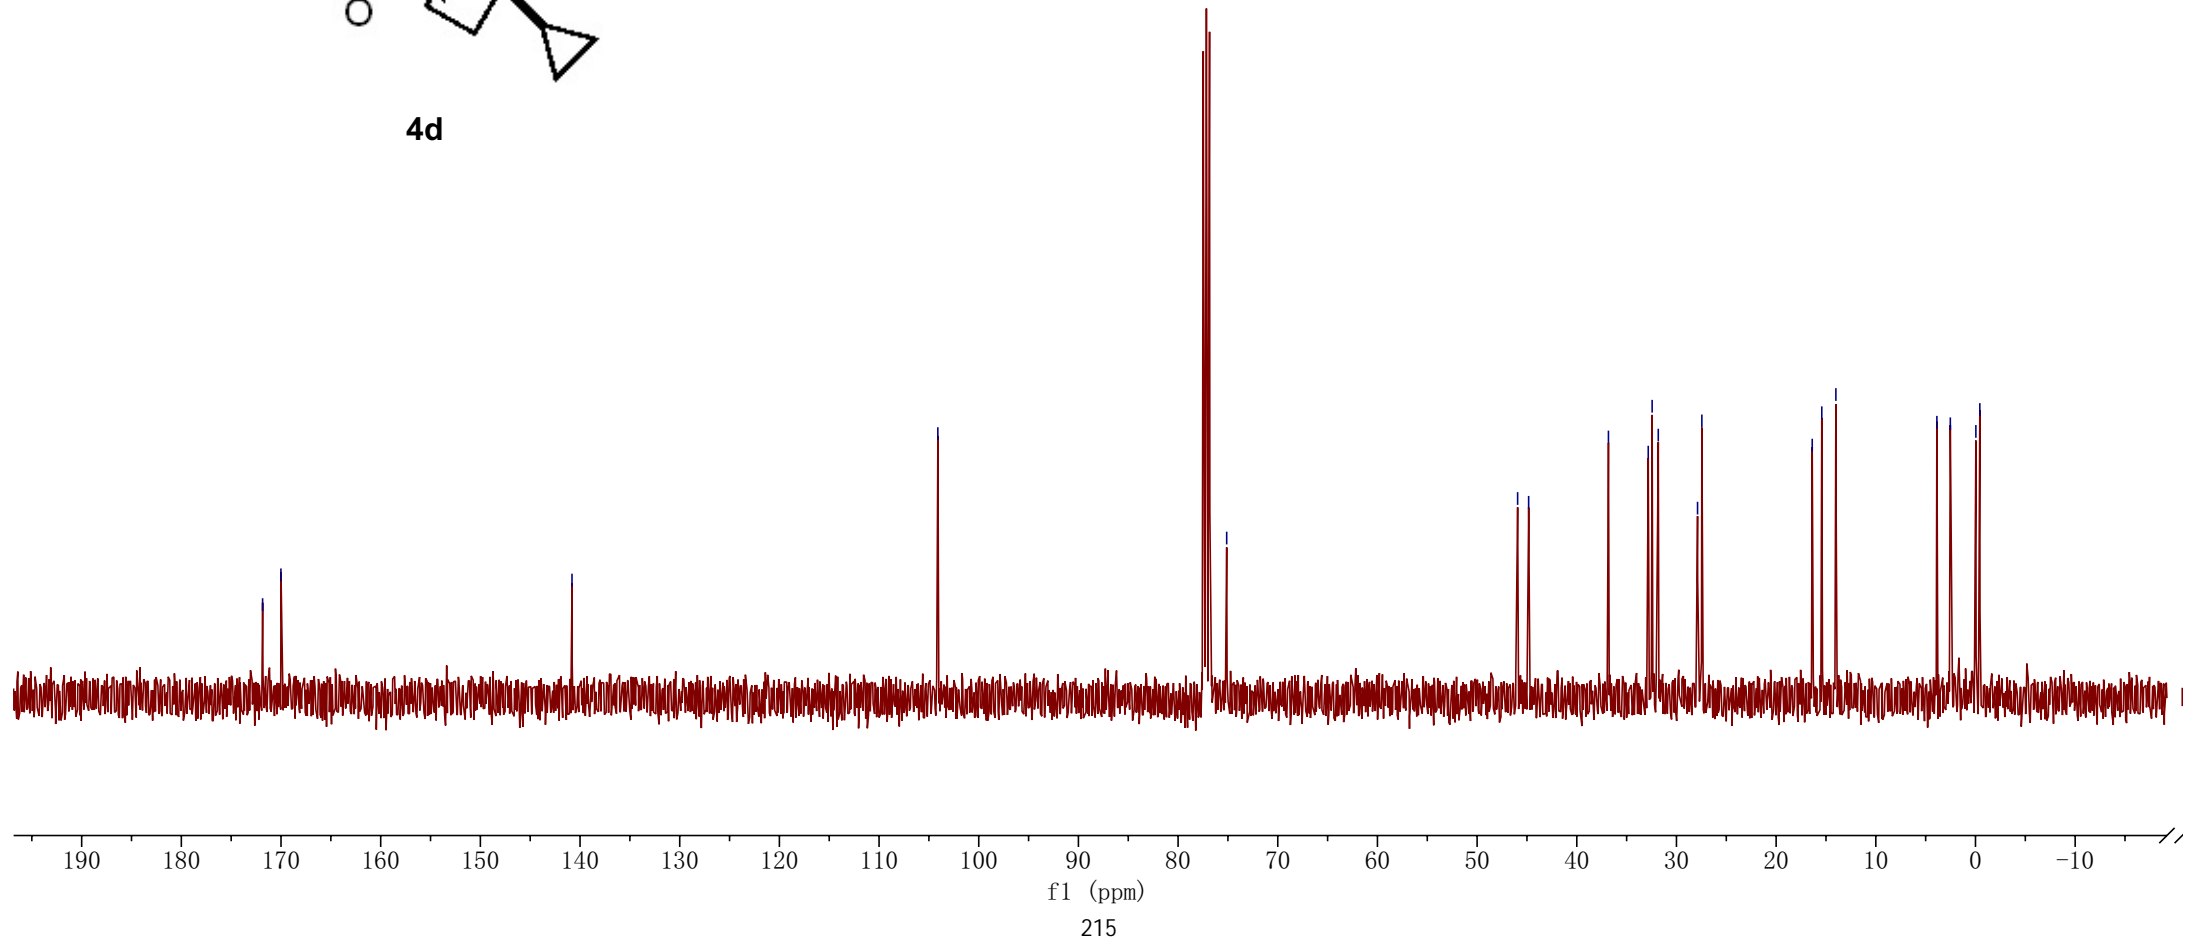

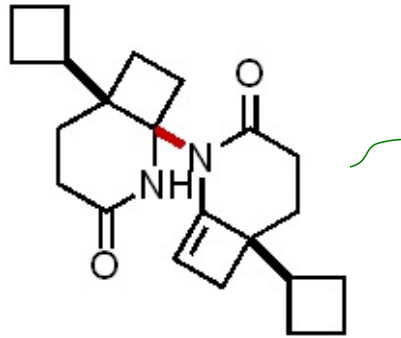

4e

6.49

4.80

2.61  
2.50  
2.47  
2.39  
2.34  
2.14  
2.12  
2.09  
1.98  
1.95  
1.82  
1.74  
1.71  
1.62  
1.34  
1.30

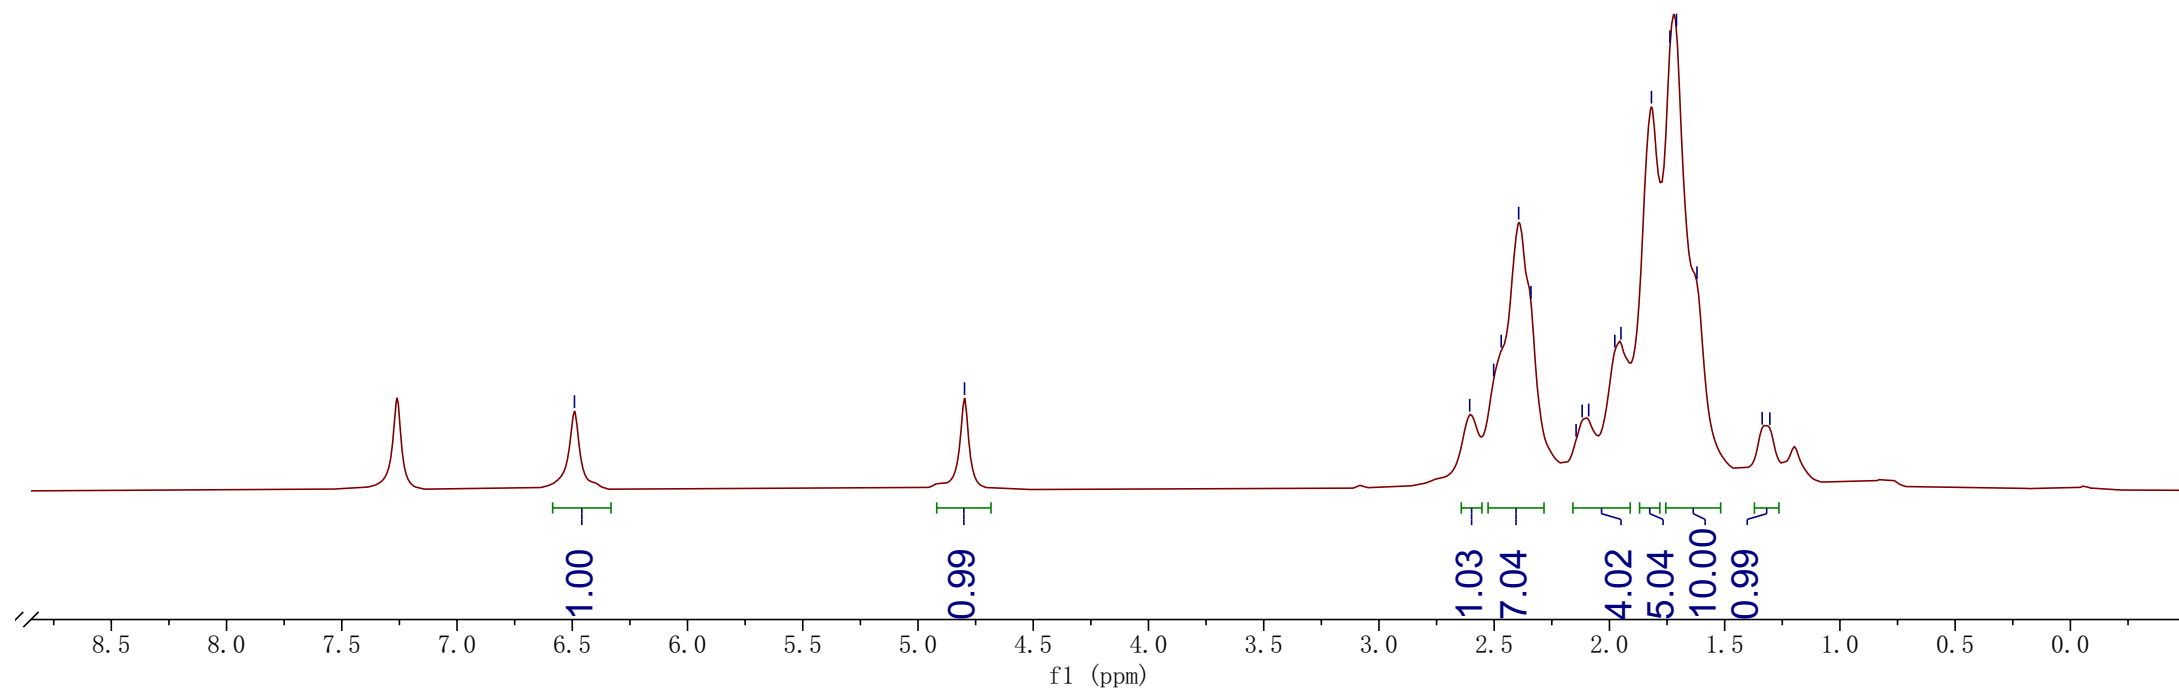

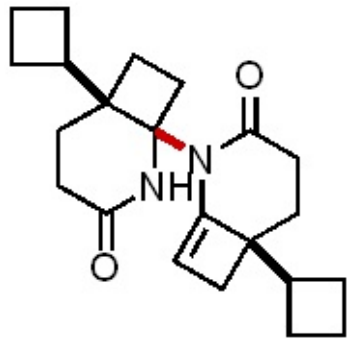

4e

~171.87  
~169.62

-140.70

-103.81

-74.36

47.74  
45.67  
39.79  
35.73  
32.94  
32.66  
31.73  
28.04  
27.57  
24.69  
23.95  
23.88  
23.71  
22.90  
18.16  
17.66  
17.24

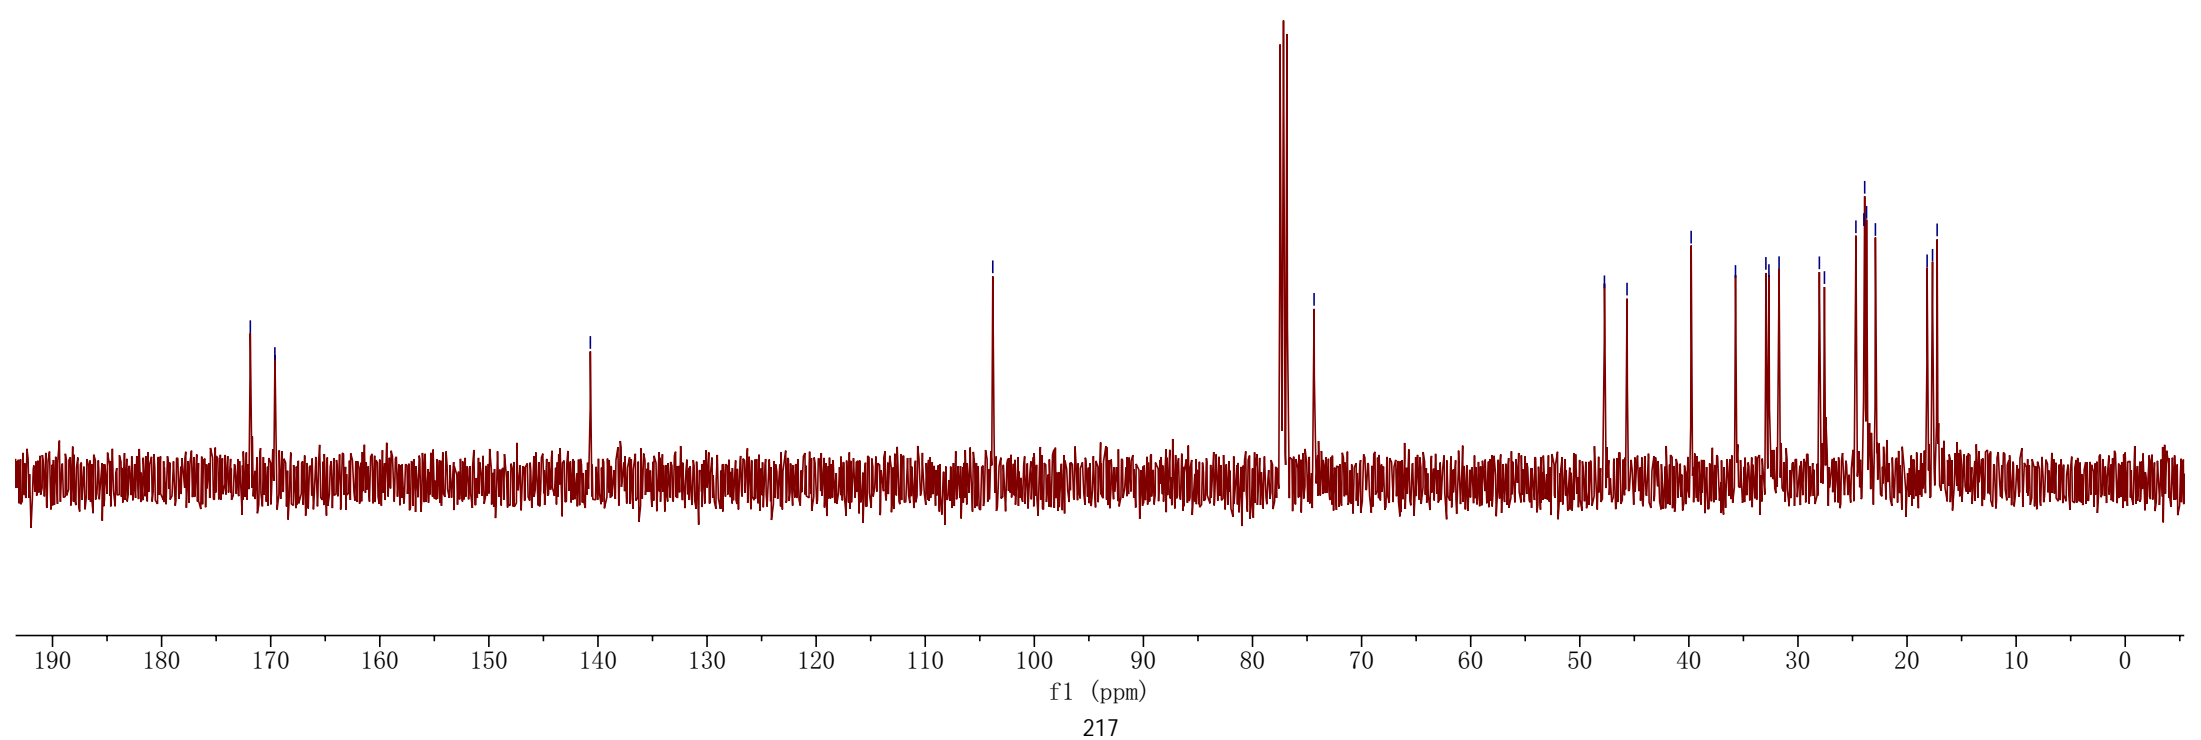

6.18  
4.83  
2.61  
2.58  
2.55  
2.52  
2.50  
2.48  
2.44  
2.39  
2.33  
2.30  
2.27  
2.25  
2.21  
2.19  
2.17  
2.12  
2.09  
2.03  
2.00  
1.97  
1.95  
1.93  
1.90  
1.86  
1.83  
1.79  
1.78  
1.74  
1.63  
1.60  
1.57  
1.55  
1.52  
1.48  
1.40  
1.38  
1.35  
1.32  
1.29  
1.16  
1.13  
1.11  
1.09

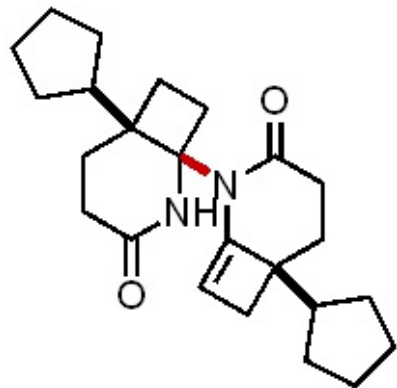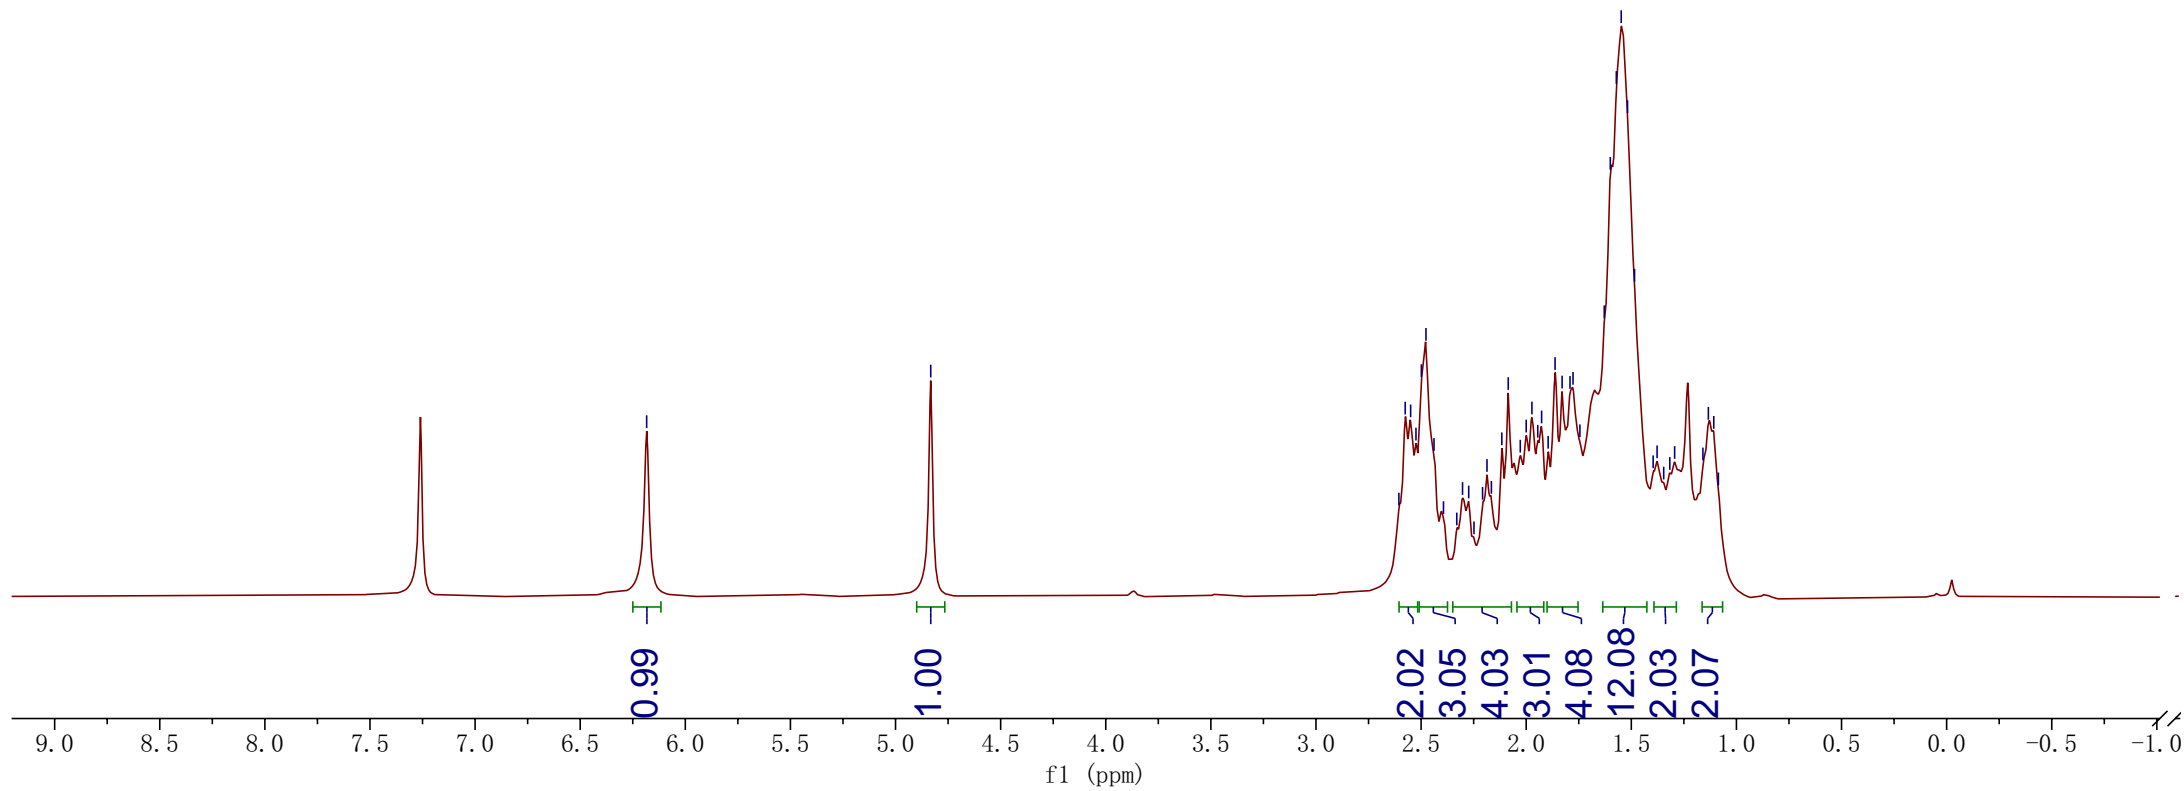

~171.74  
~169.84

-143.18

-104.17

-75.16  
48.52  
47.49  
44.10  
38.36  
33.40  
33.04  
31.67  
30.03  
29.33  
28.71  
27.87  
27.53  
27.11  
26.97  
26.59  
25.85  
25.63  
24.63  
18.37

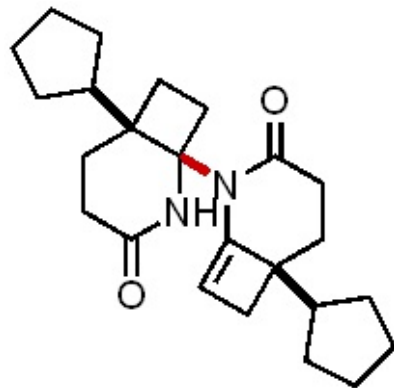

4f

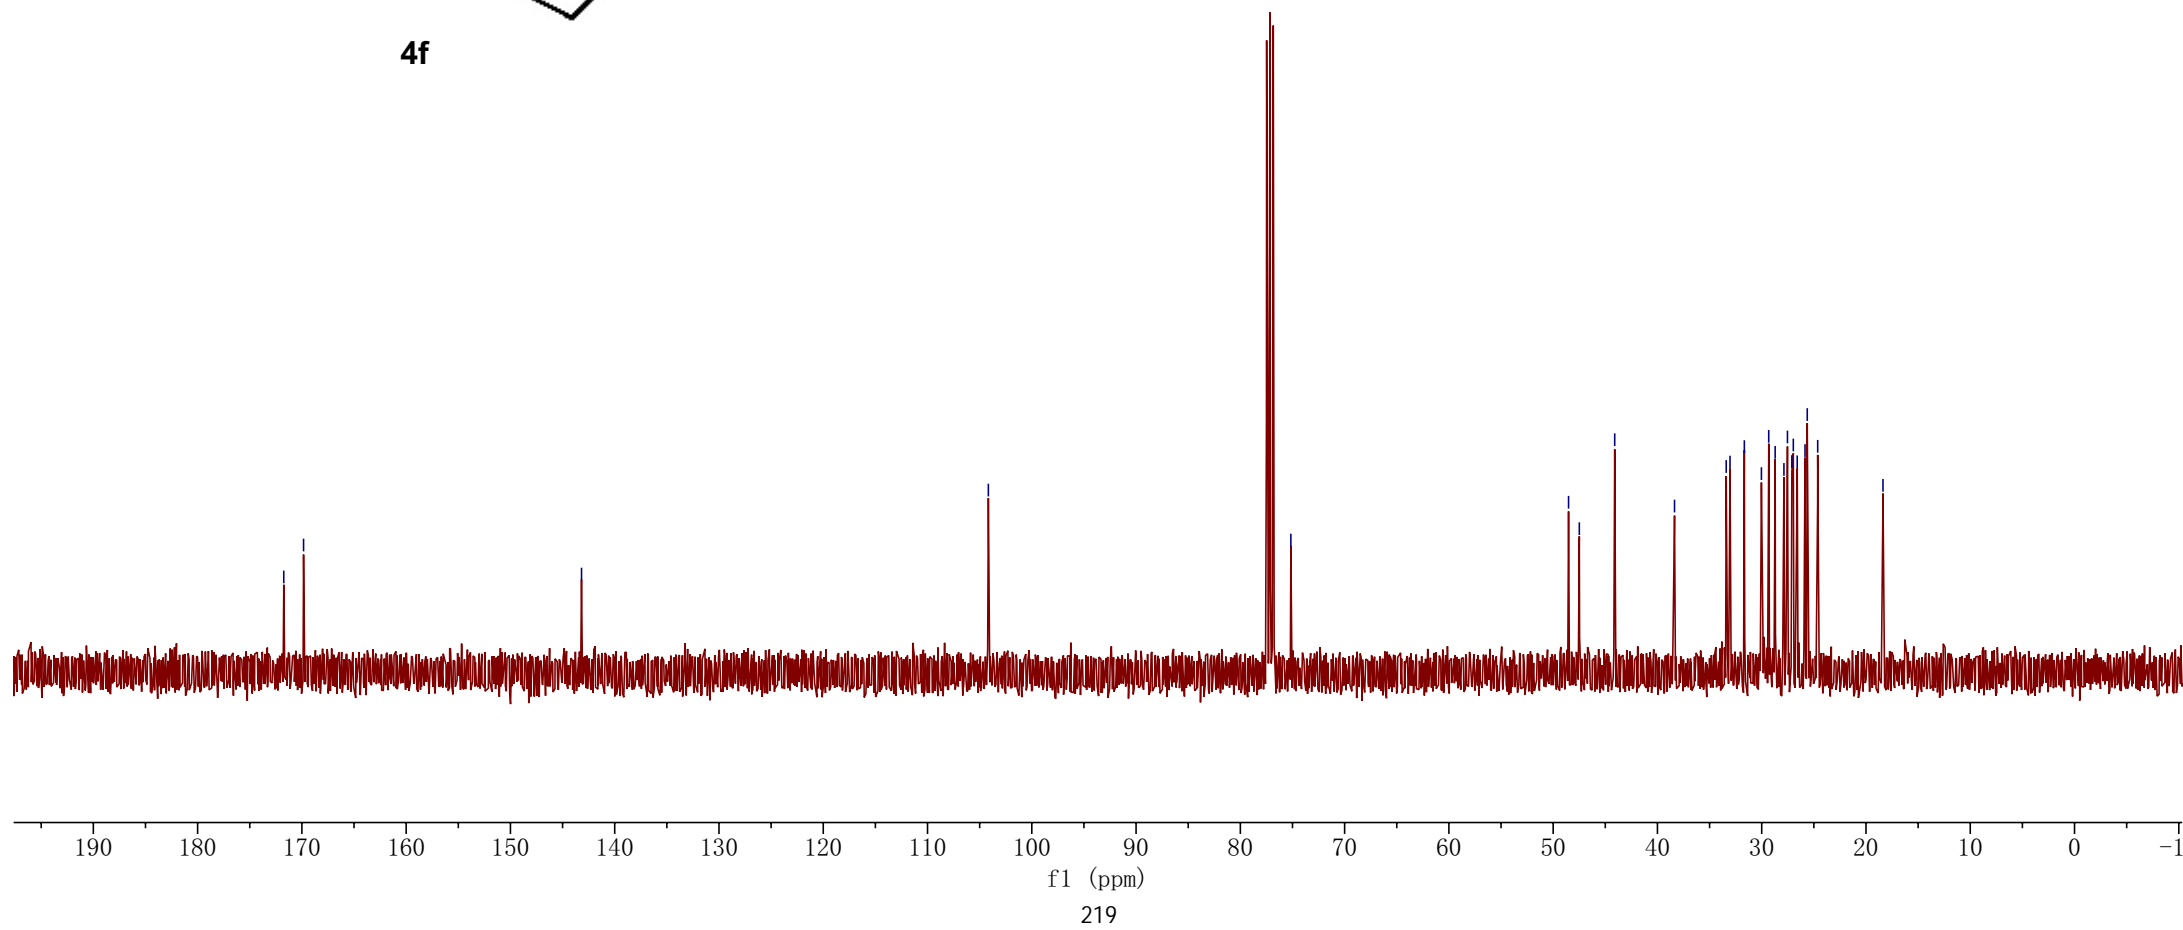

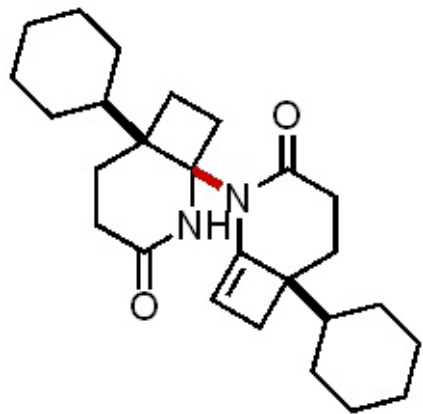

4g

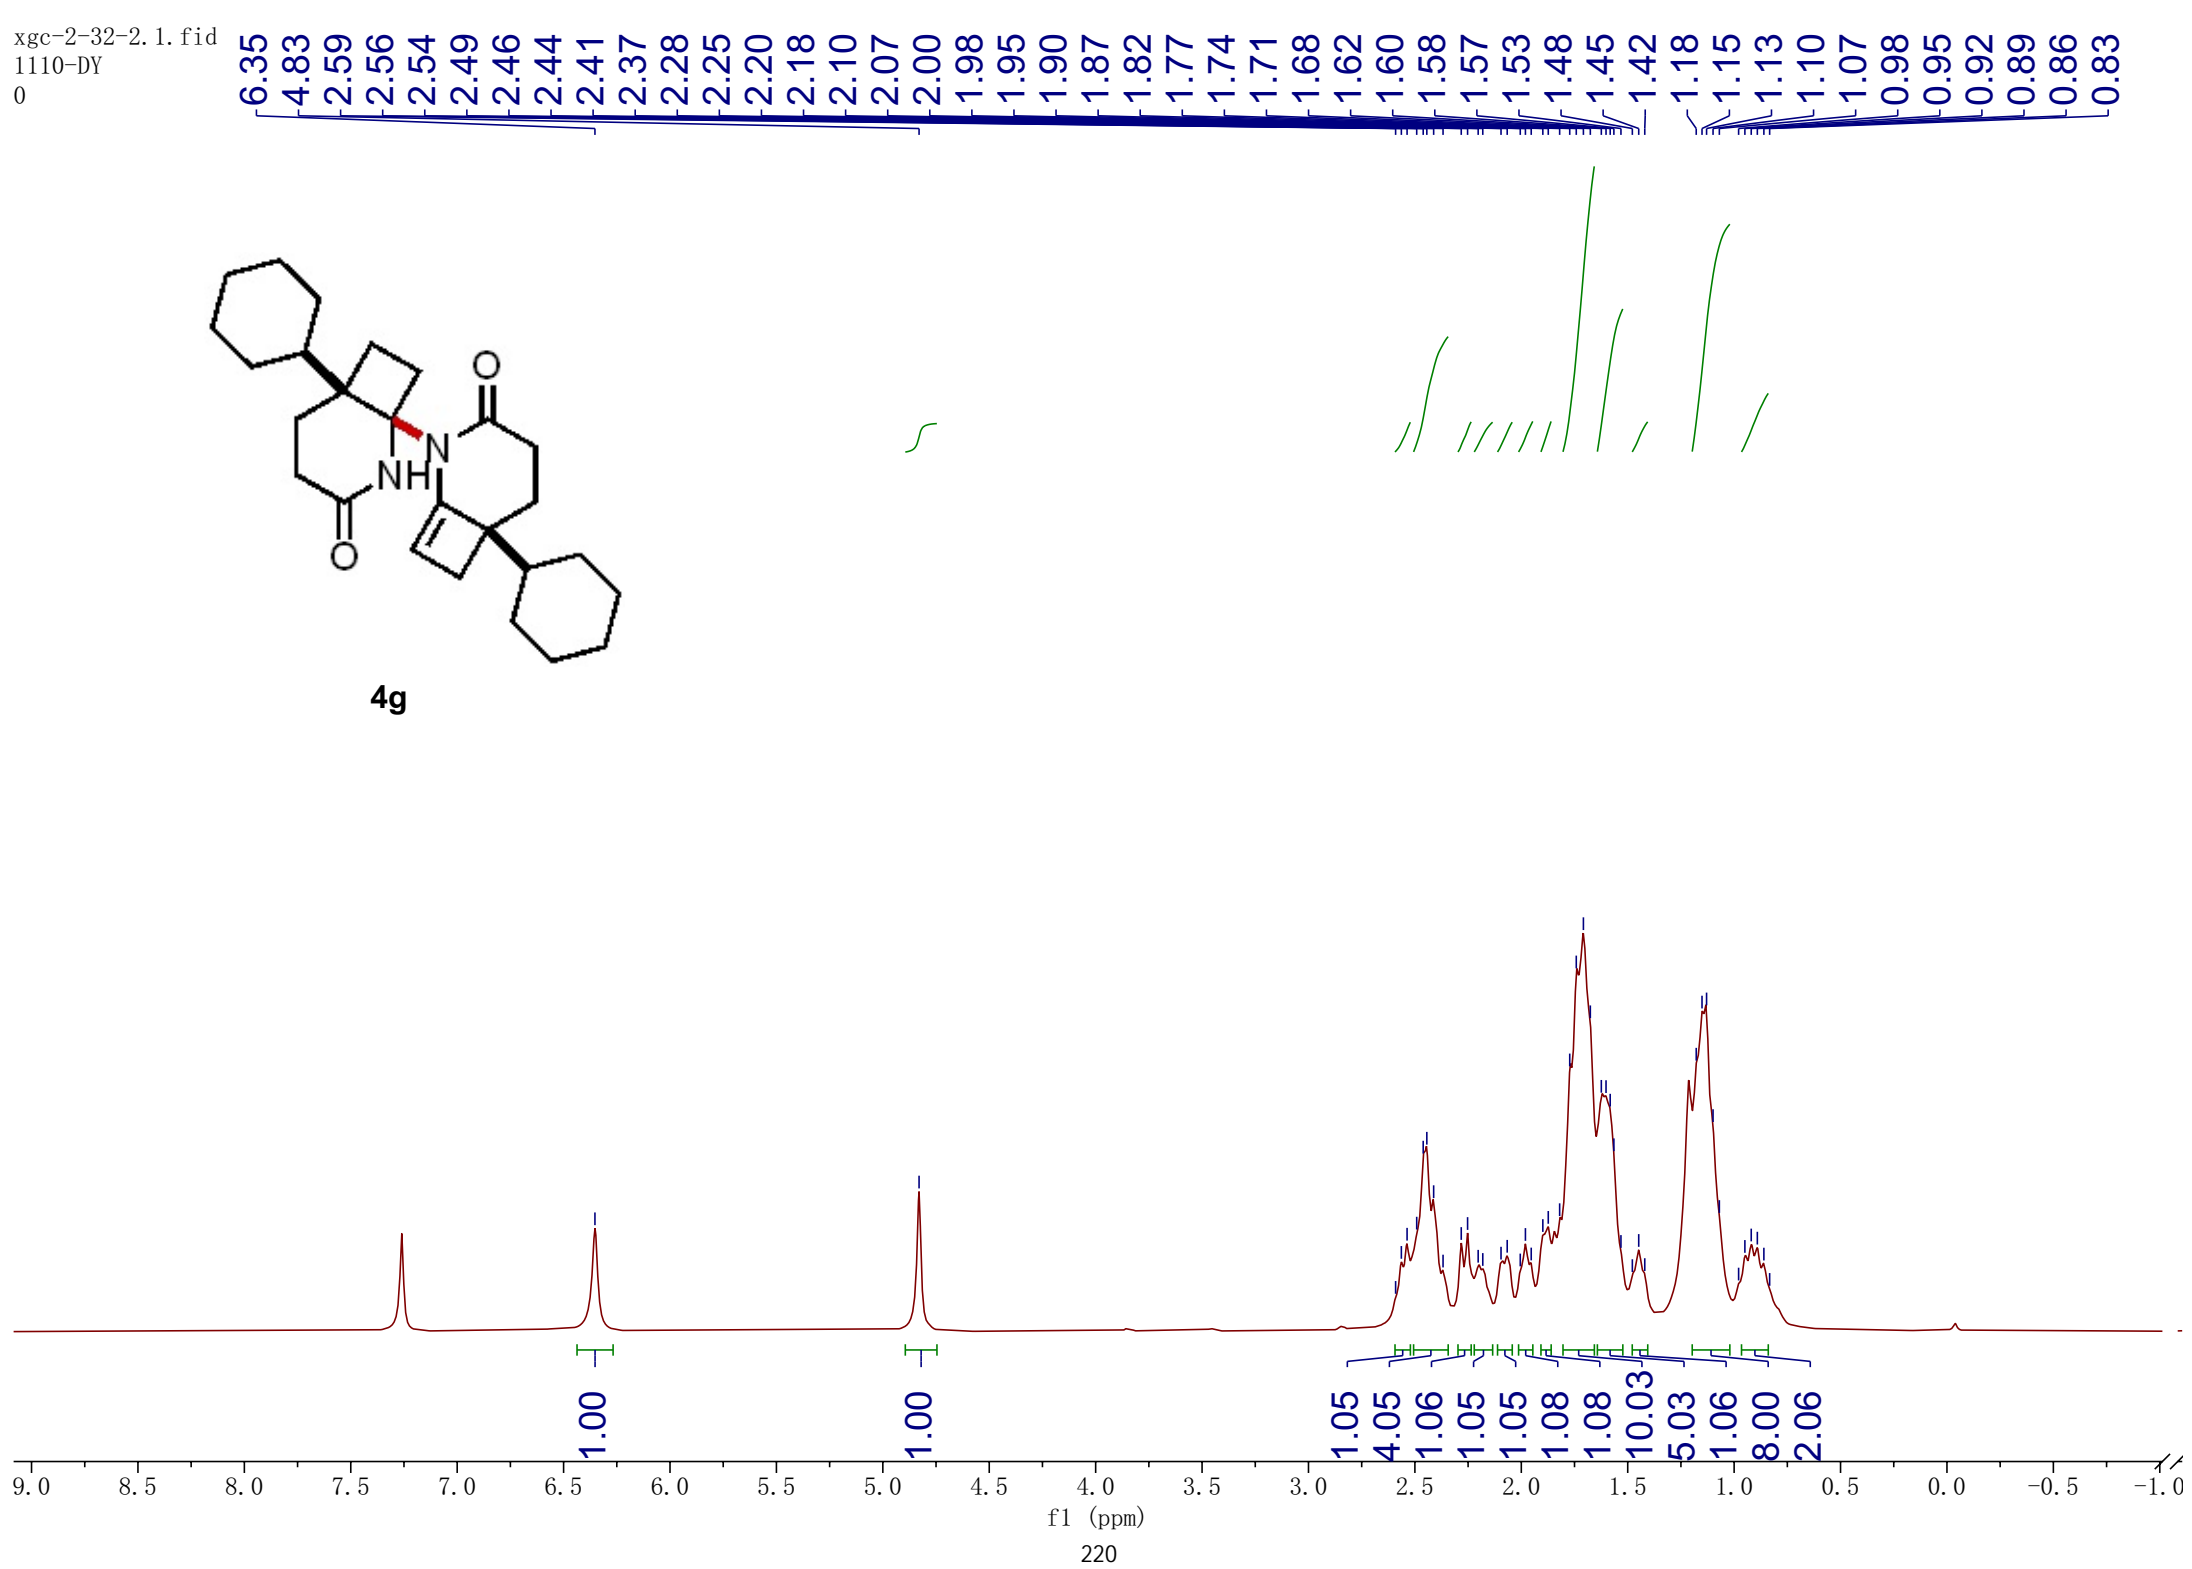

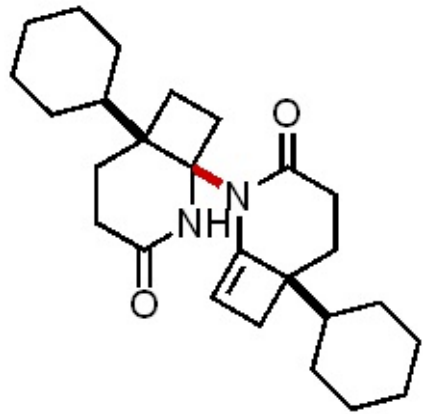

4g

171.58  
170.02

142.00

104.71

75.54  
49.42  
48.11  
41.82  
37.27  
33.58  
33.40  
31.76  
29.78  
28.42  
27.88  
27.72  
27.50  
27.10  
26.76  
26.72  
26.54  
26.46  
24.44  
18.64

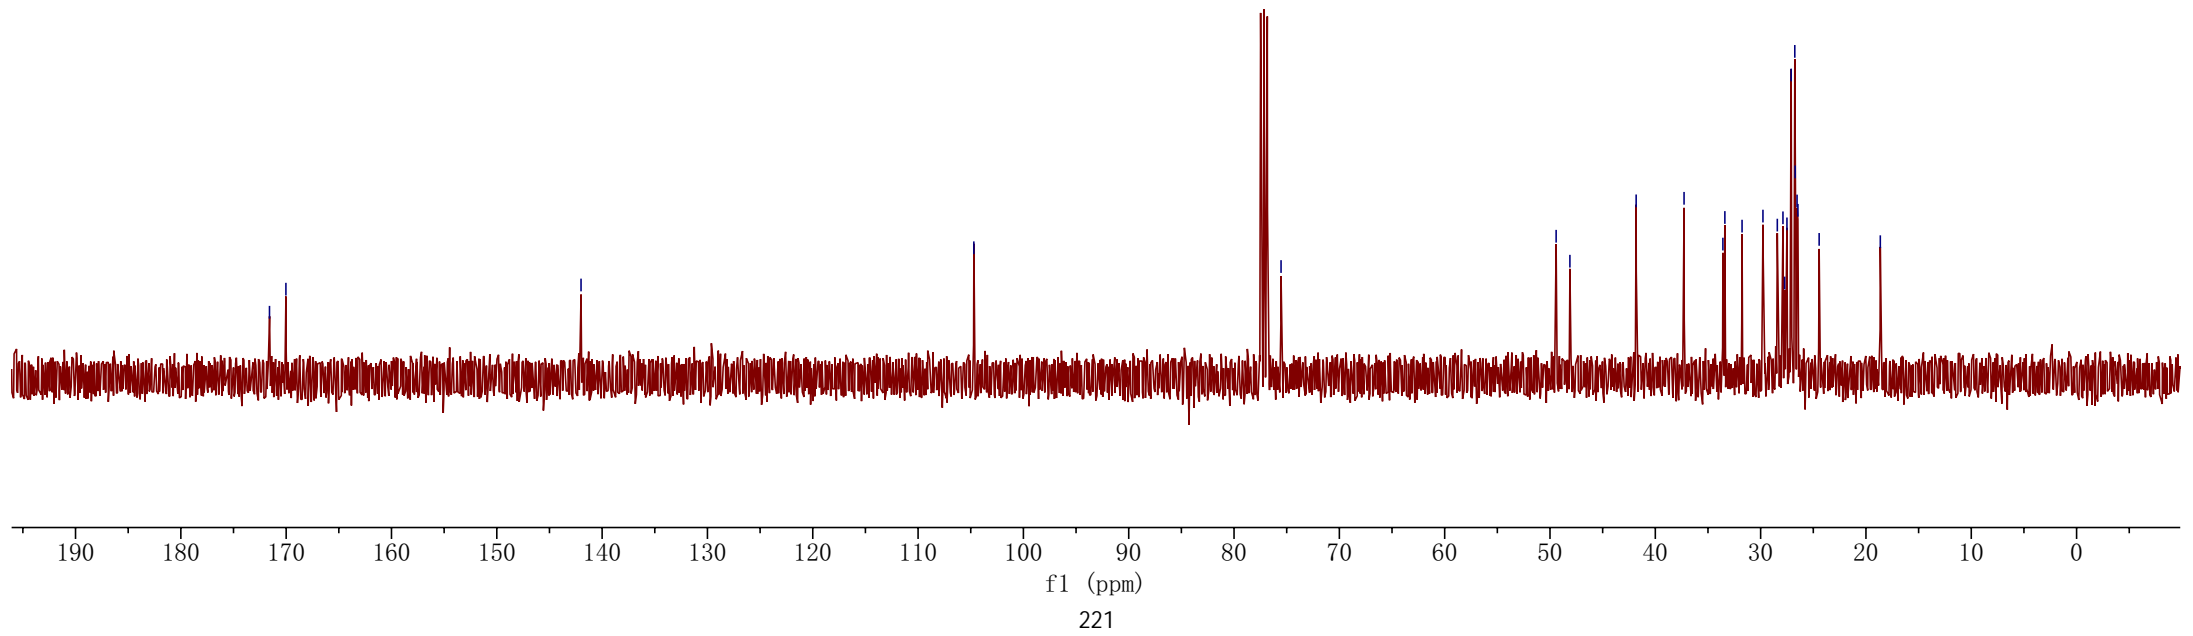

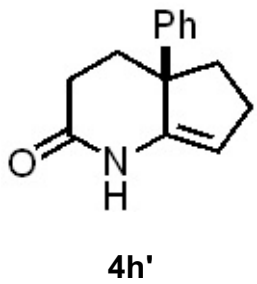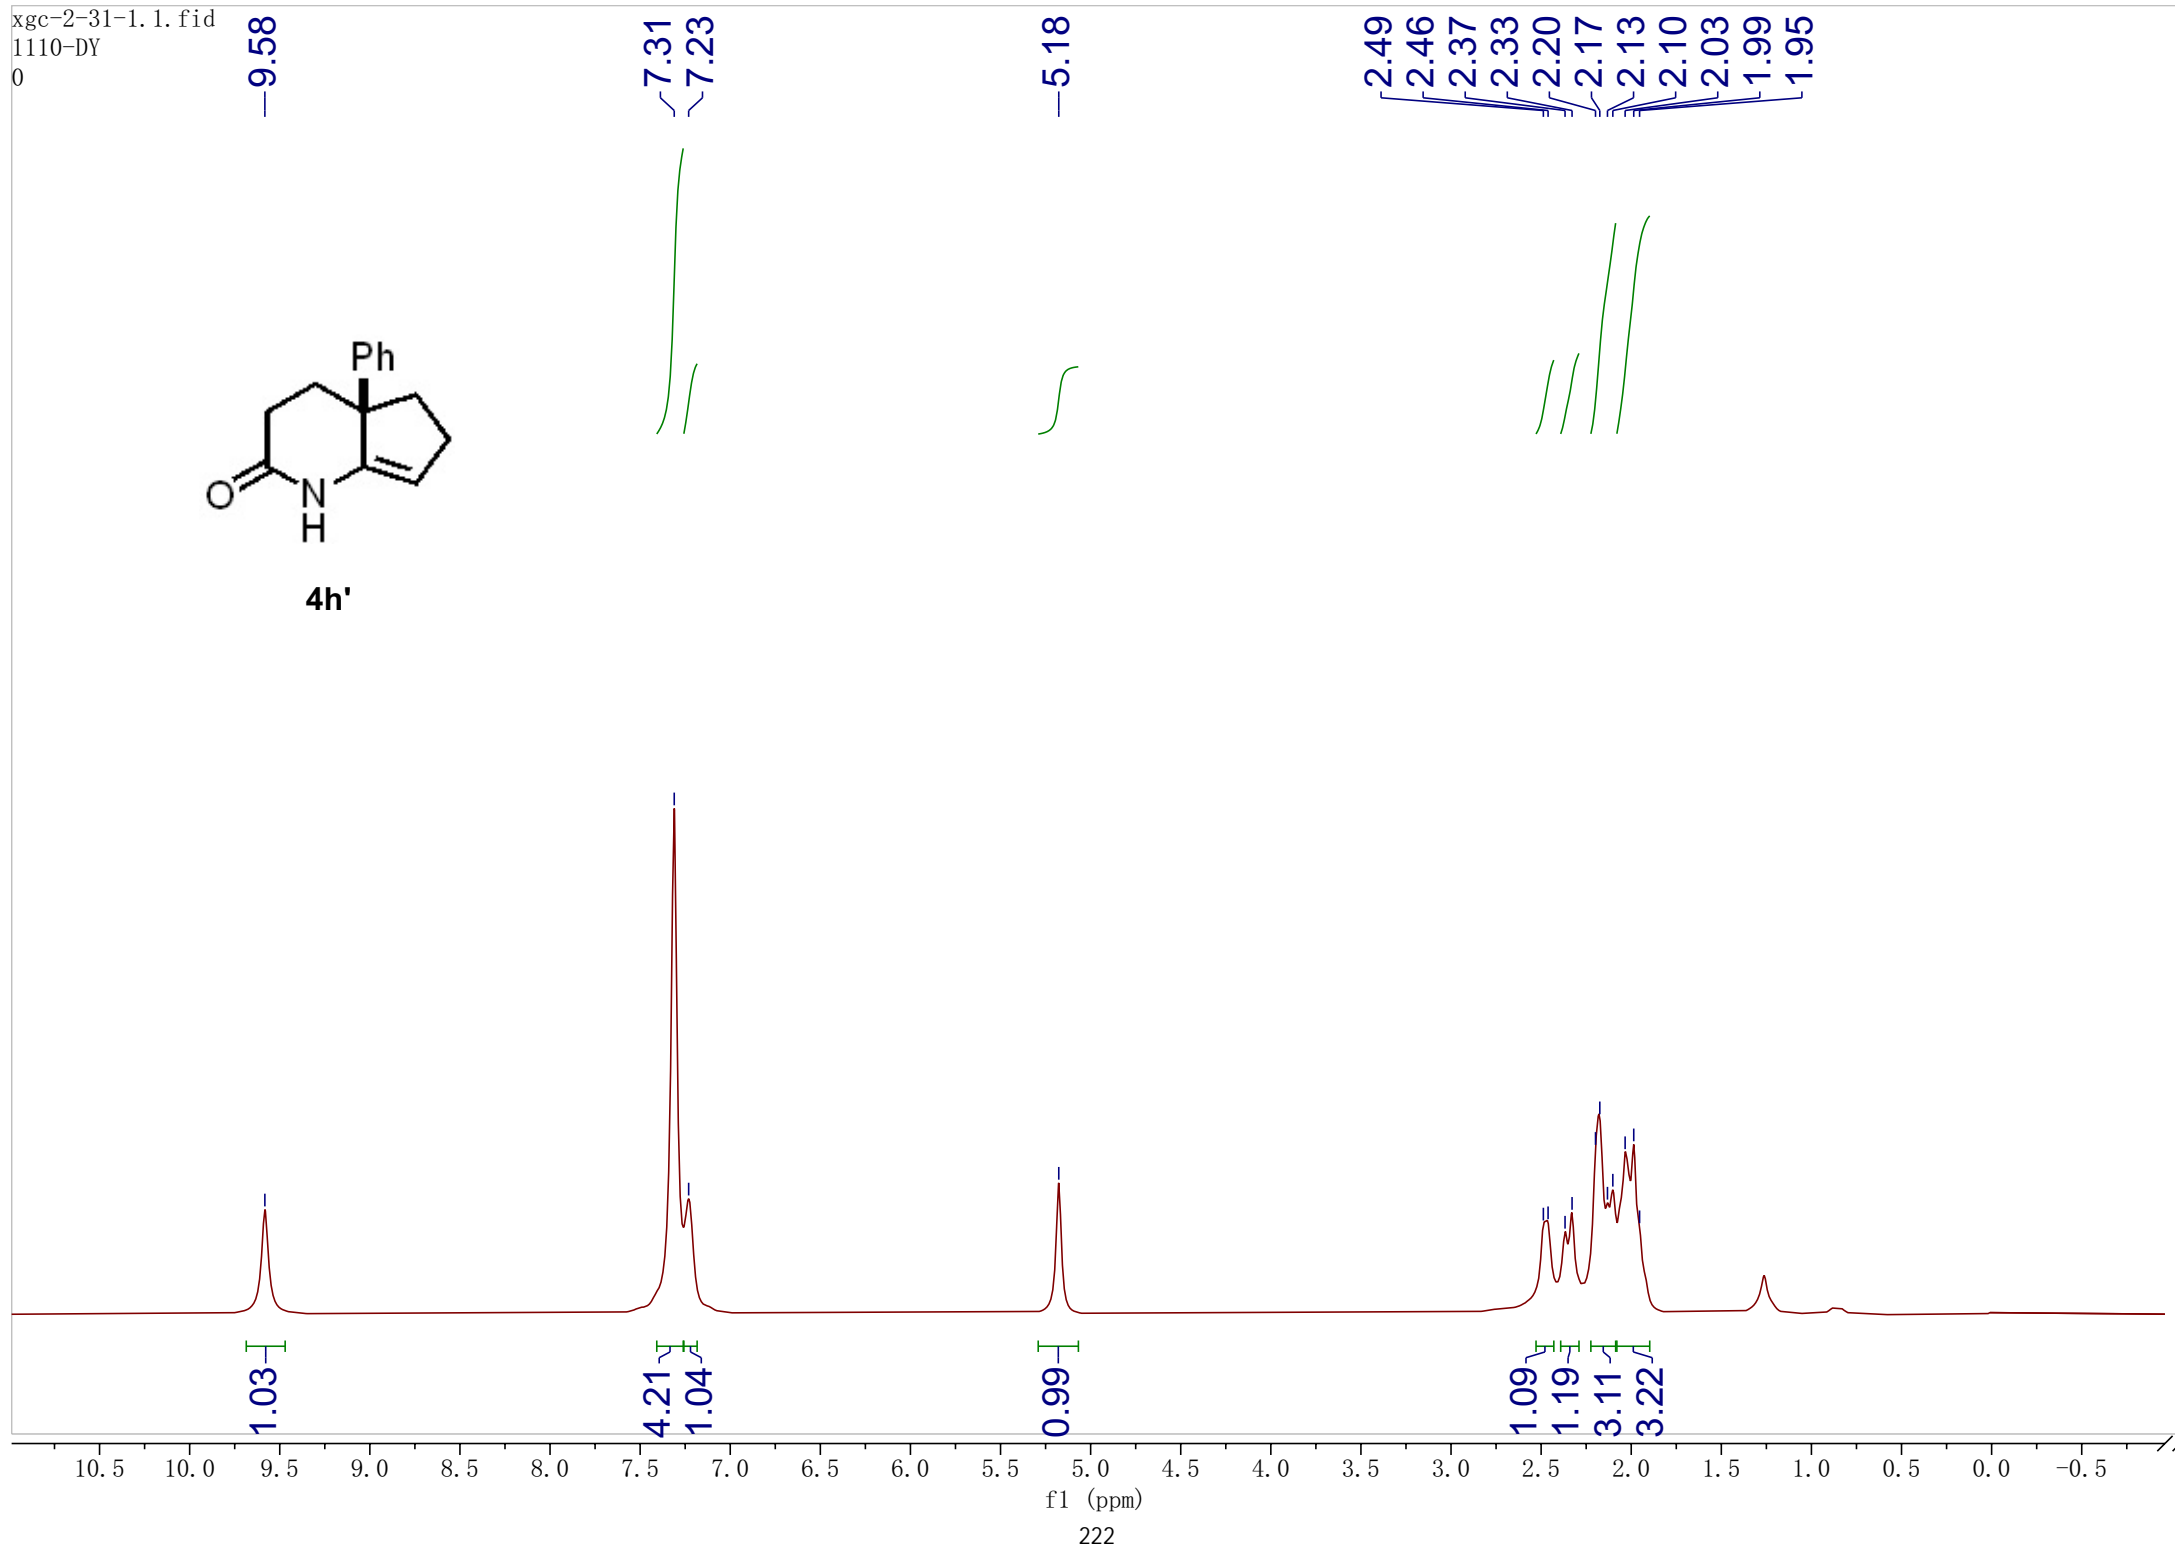

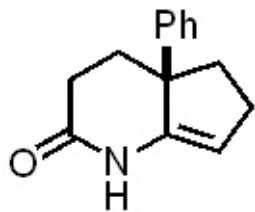

4h'

171.92  
142.77  
141.60  
128.66  
126.64  
126.44  
105.31  
50.78  
41.35  
32.92  
29.51  
27.96

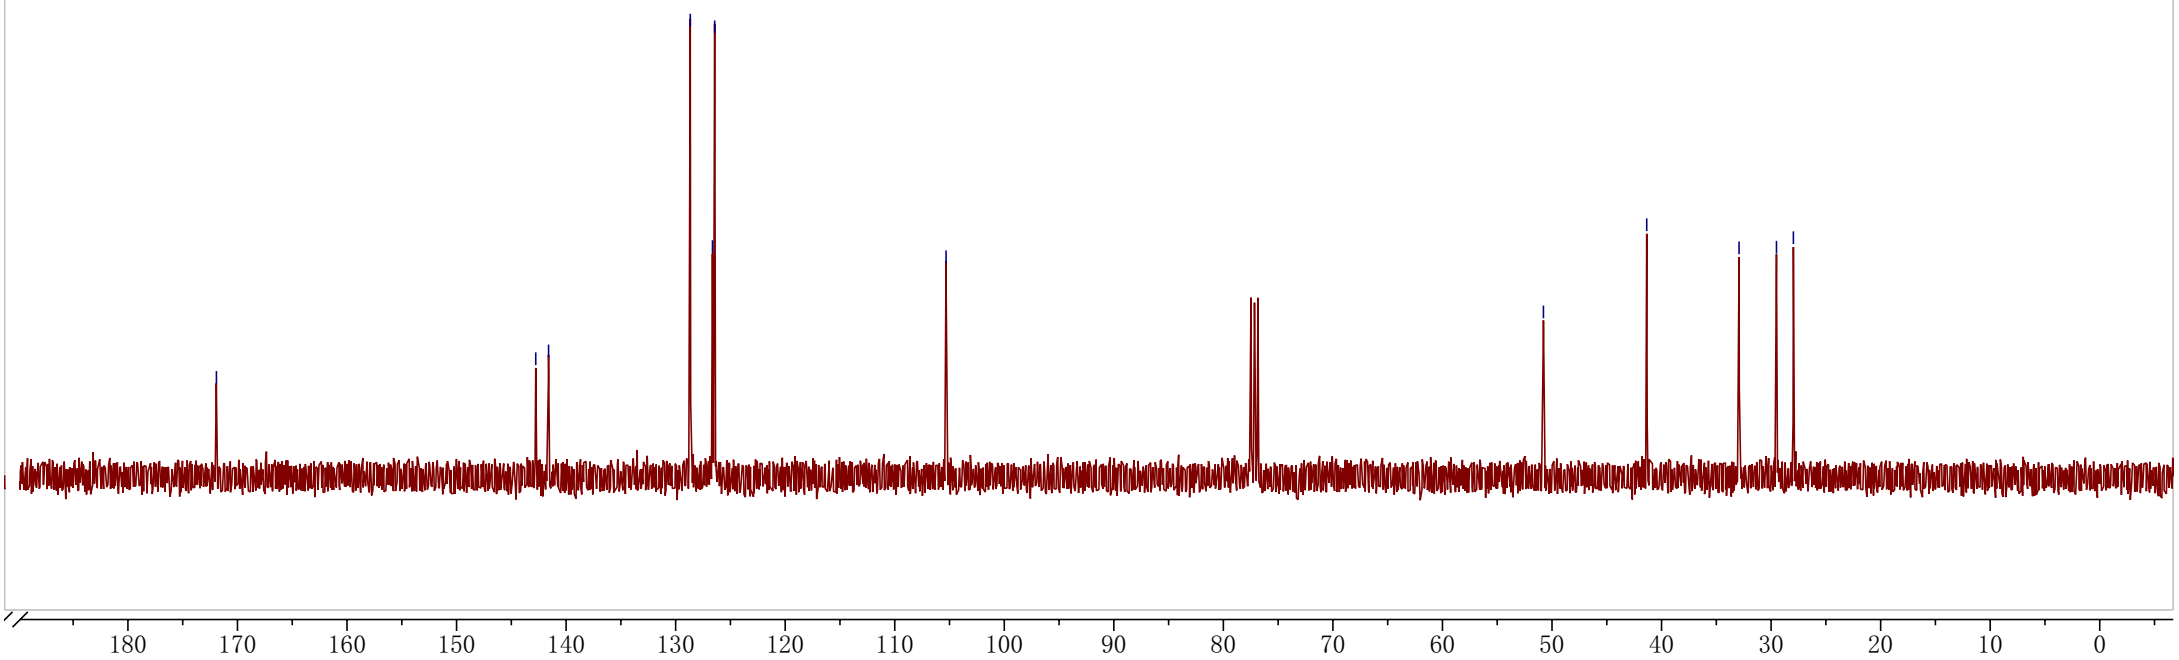

f1 (ppm)

f1k\_7\_165\_1.f1d  
PROC001

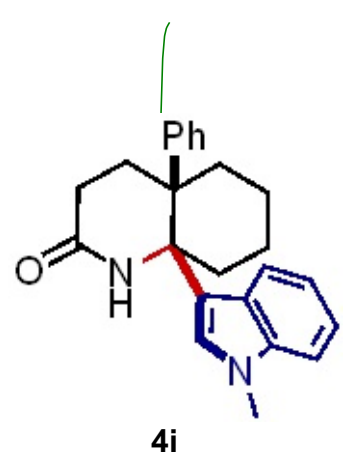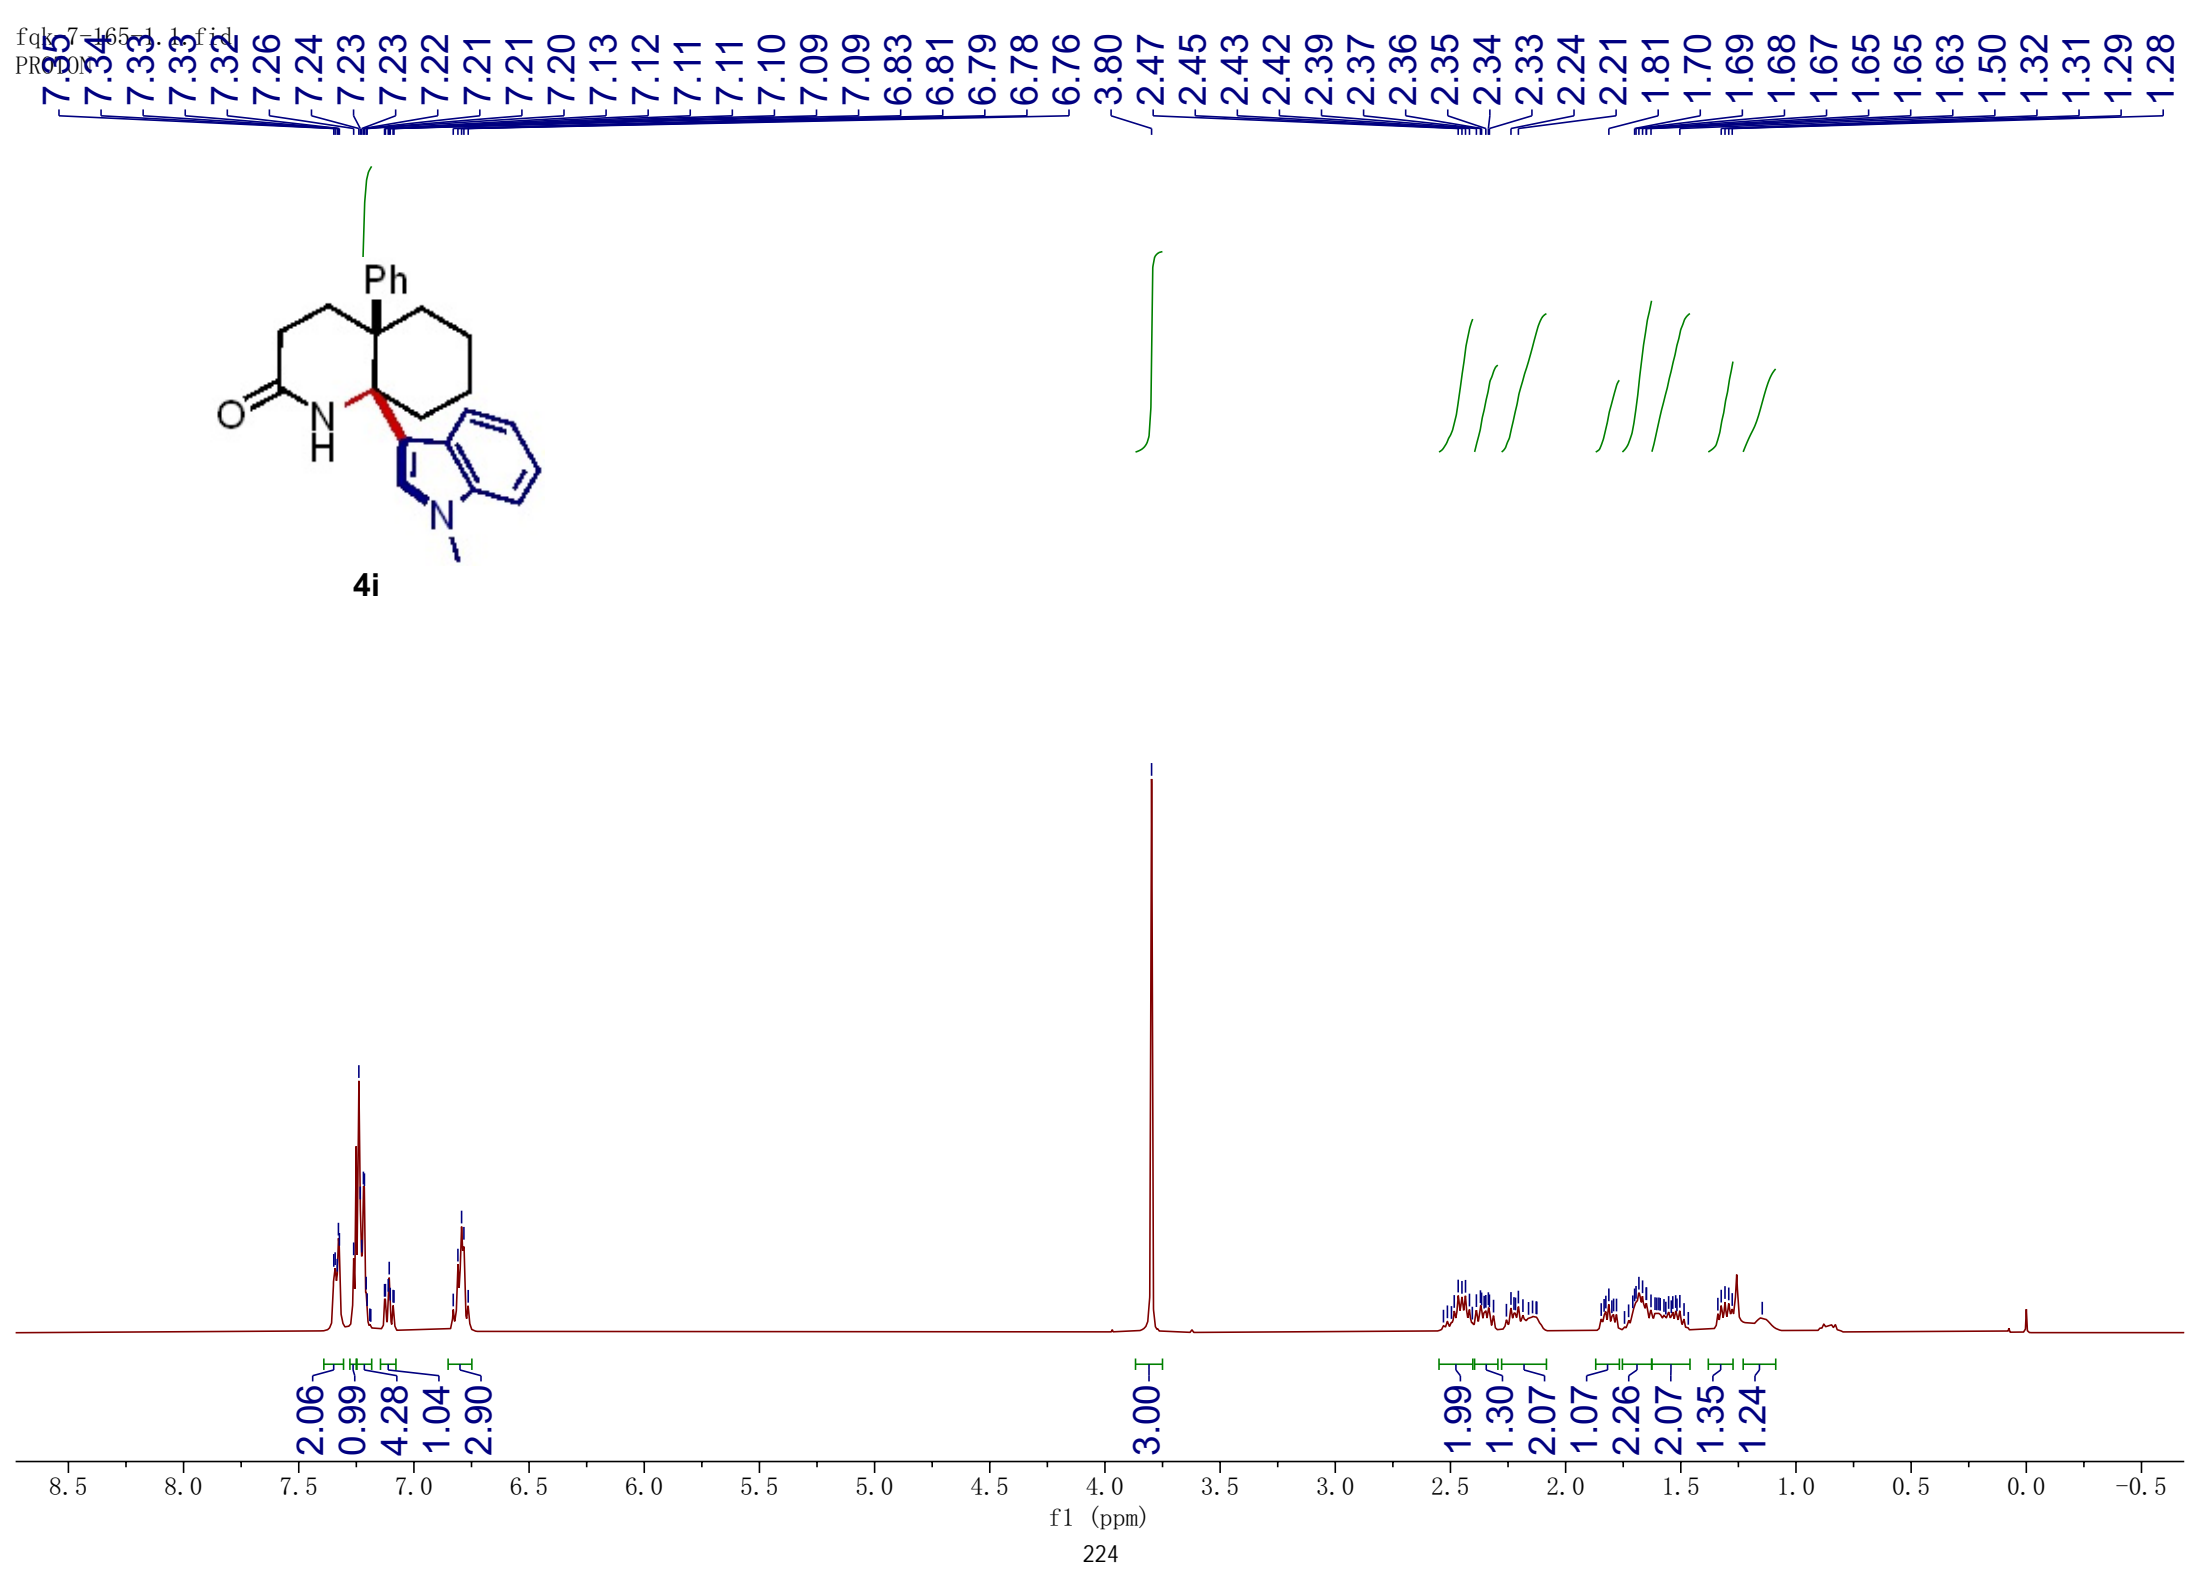

—173.01  
—144.26  
—128.05  
—127.78  
—127.19  
—127.11  
—126.39  
—121.94  
—120.88  
—119.55  
—117.02  
—109.48

—68.53

—49.54

—35.37  
—33.56  
—33.09  
—30.80  
—28.42  
—25.51  
—24.99

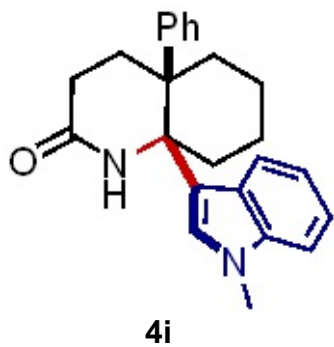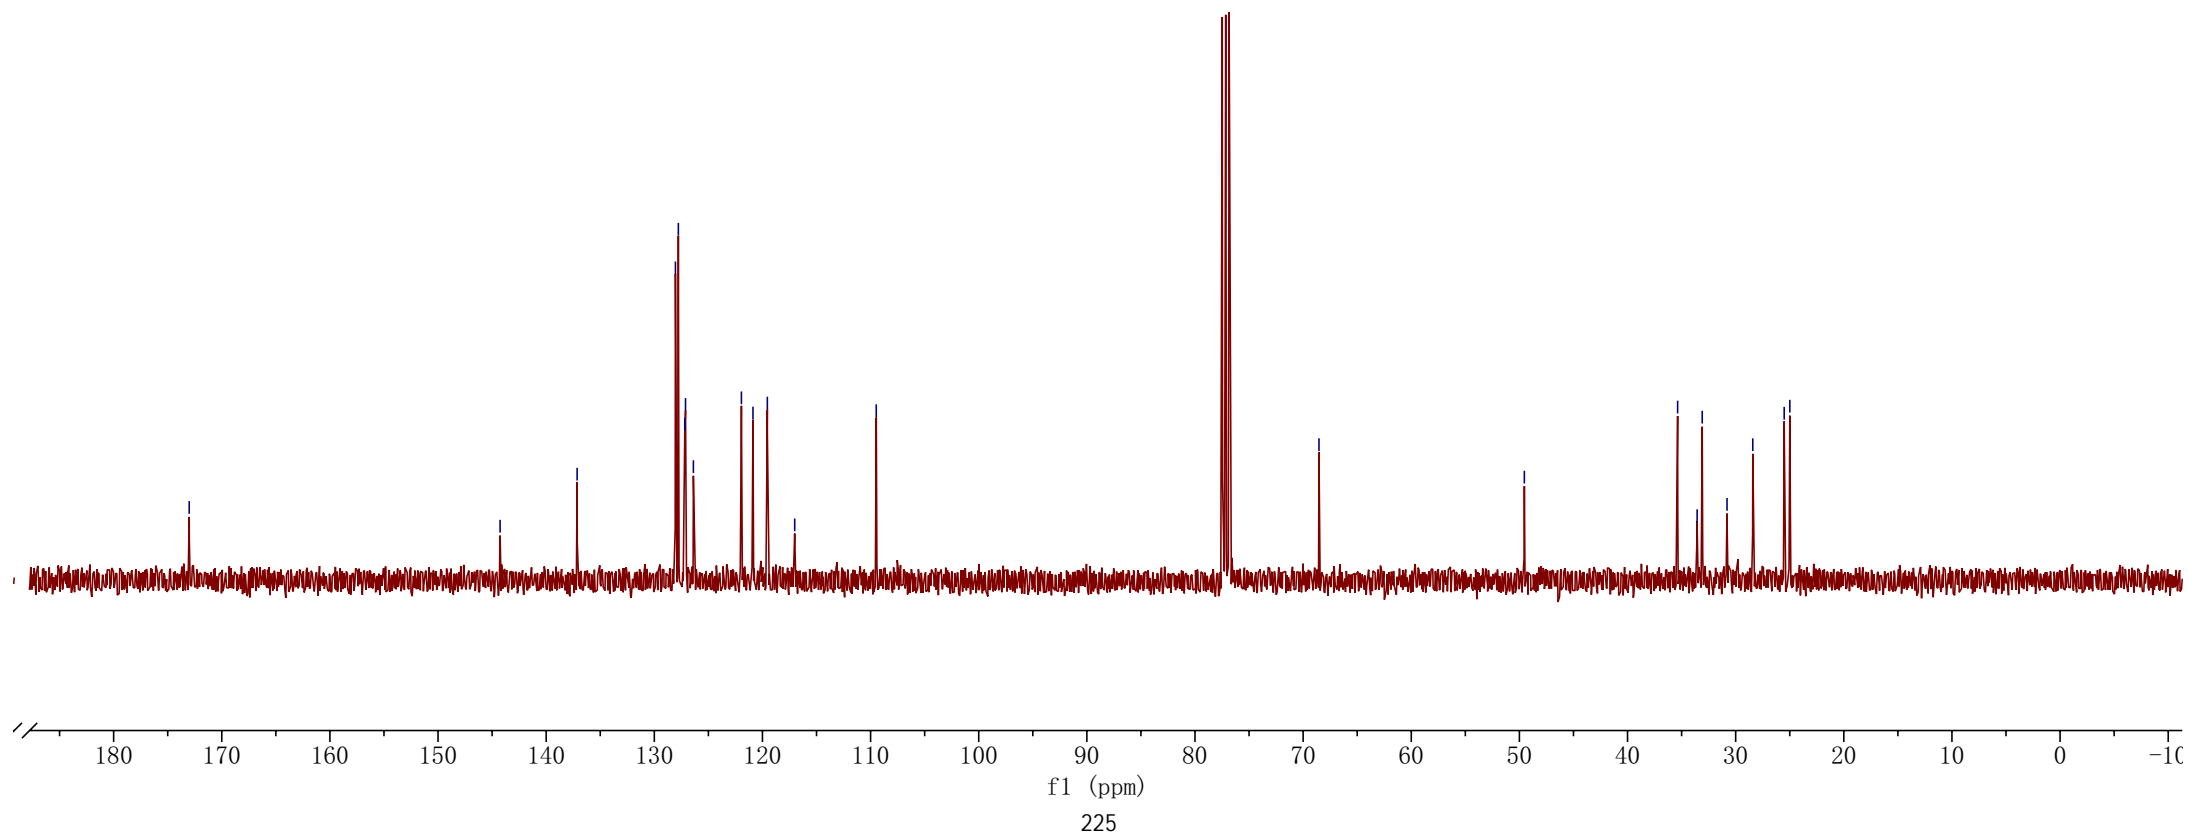

fqk-7-161-3.1.fid  
1110-DY  
0

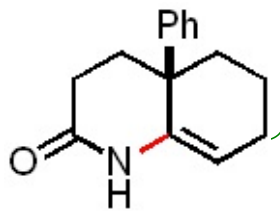

4i'

7.70  
7.33  
7.31  
7.29  
7.27  
7.26  
7.22  
7.20

5.04

3.02  
2.24  
2.23  
2.21  
2.20  
2.18  
2.04  
2.02  
2.00  
1.99  
1.97  
1.75

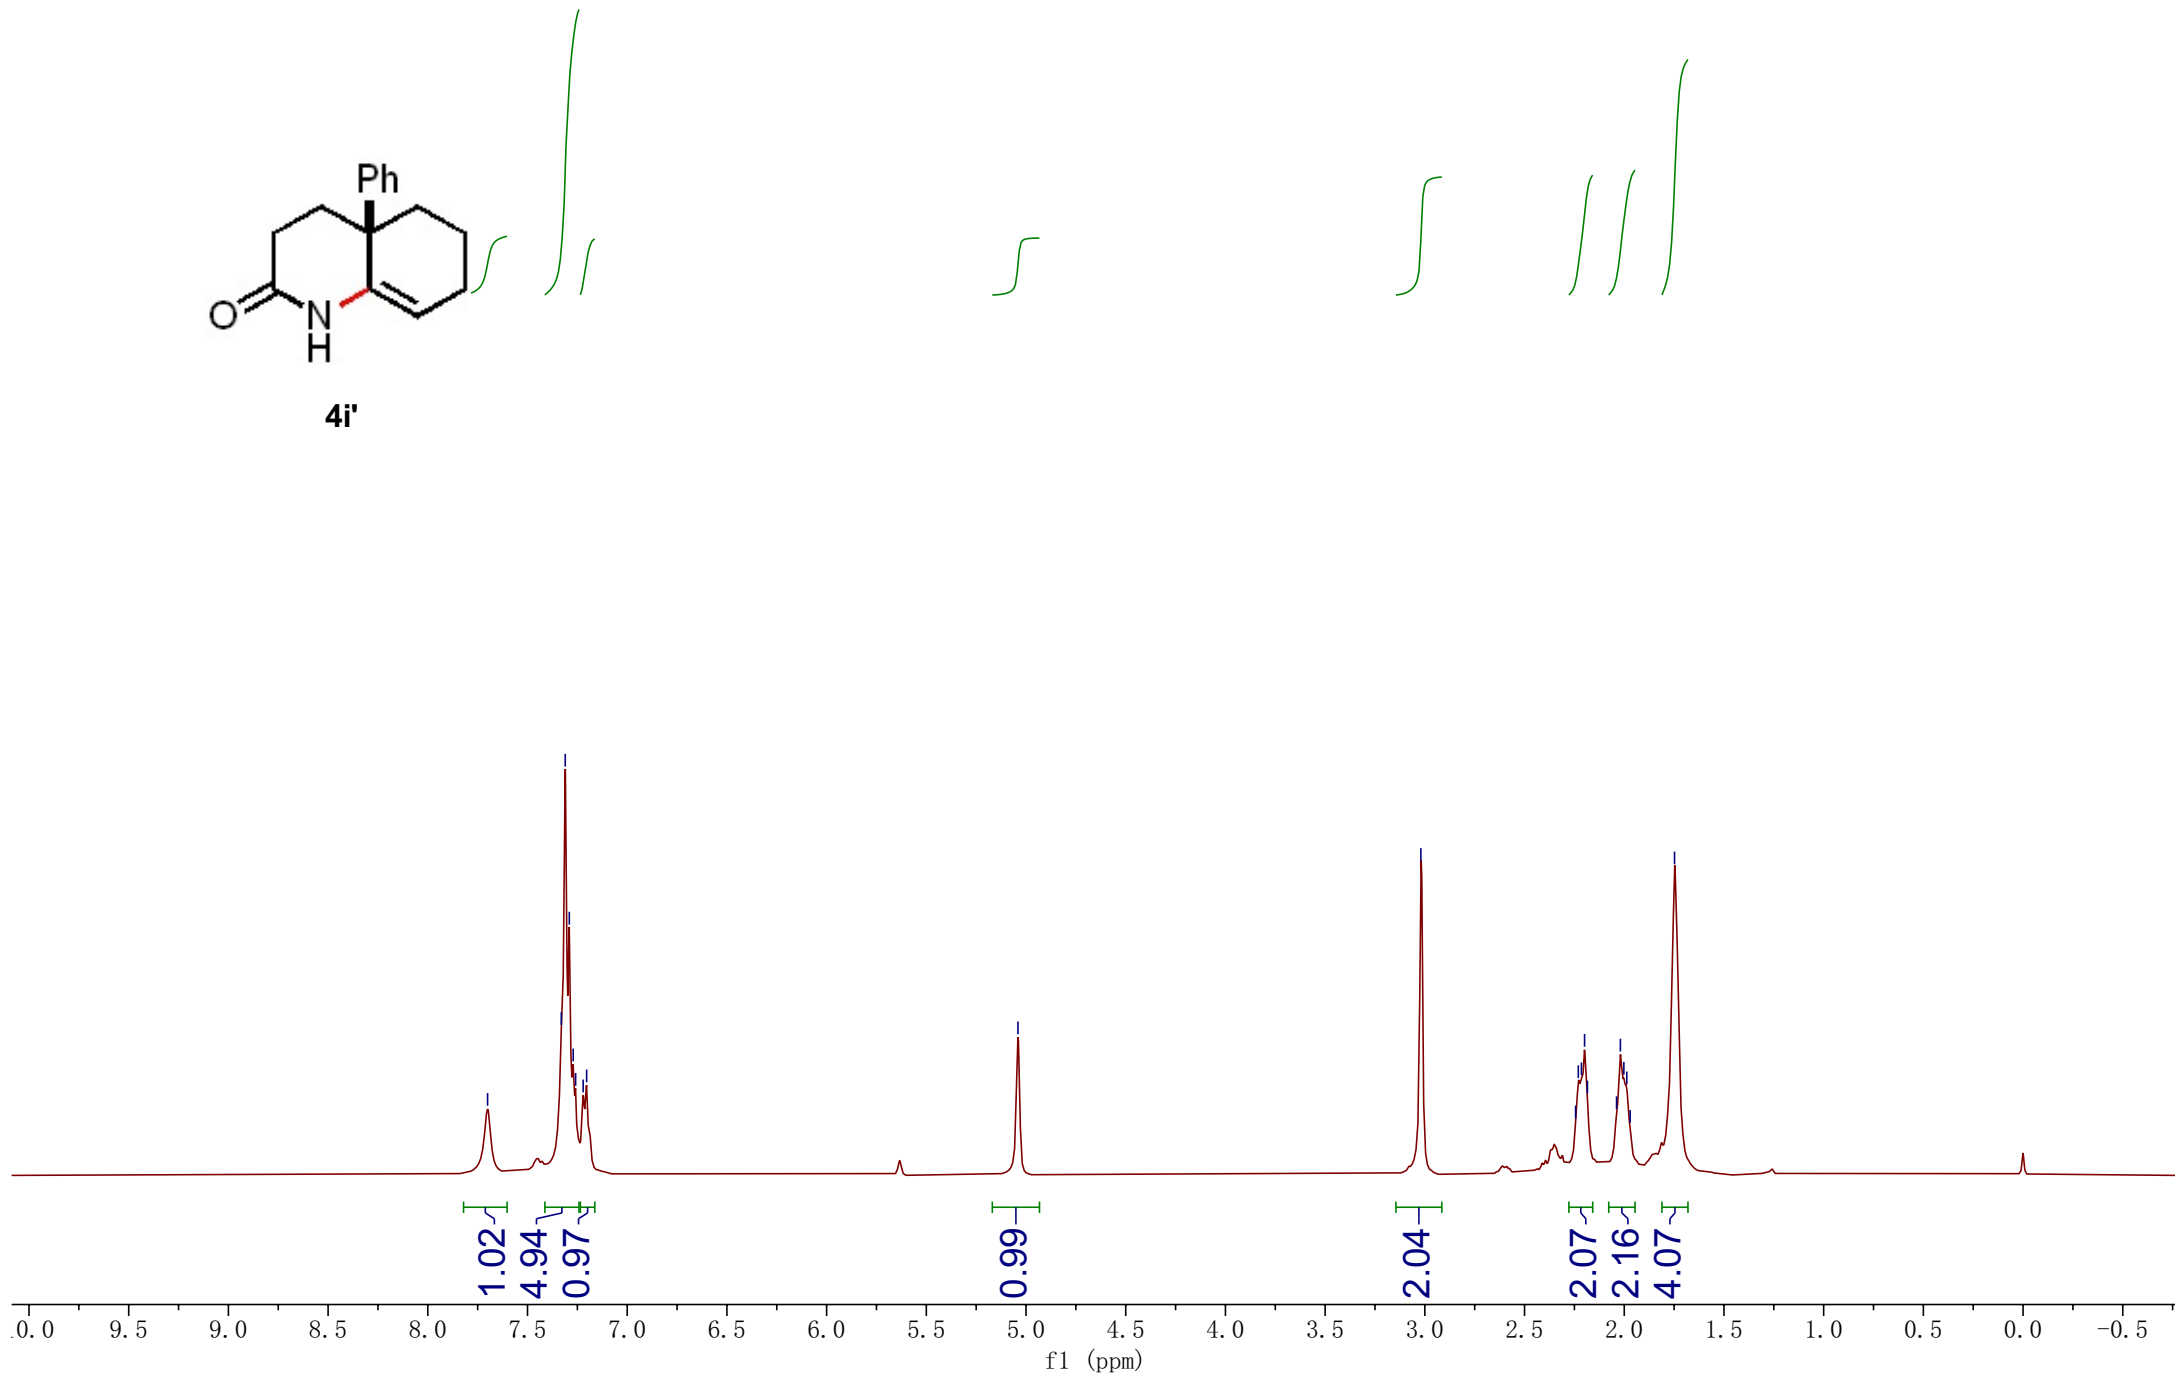

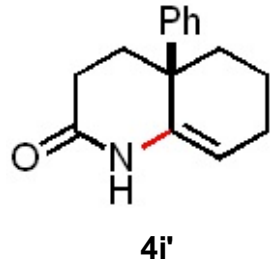

—180.40

—148.57

—144.44

∩128.57

∩126.78

∩125.33

—98.34

—51.82

∩37.79

∩36.25

∩34.40

—23.36

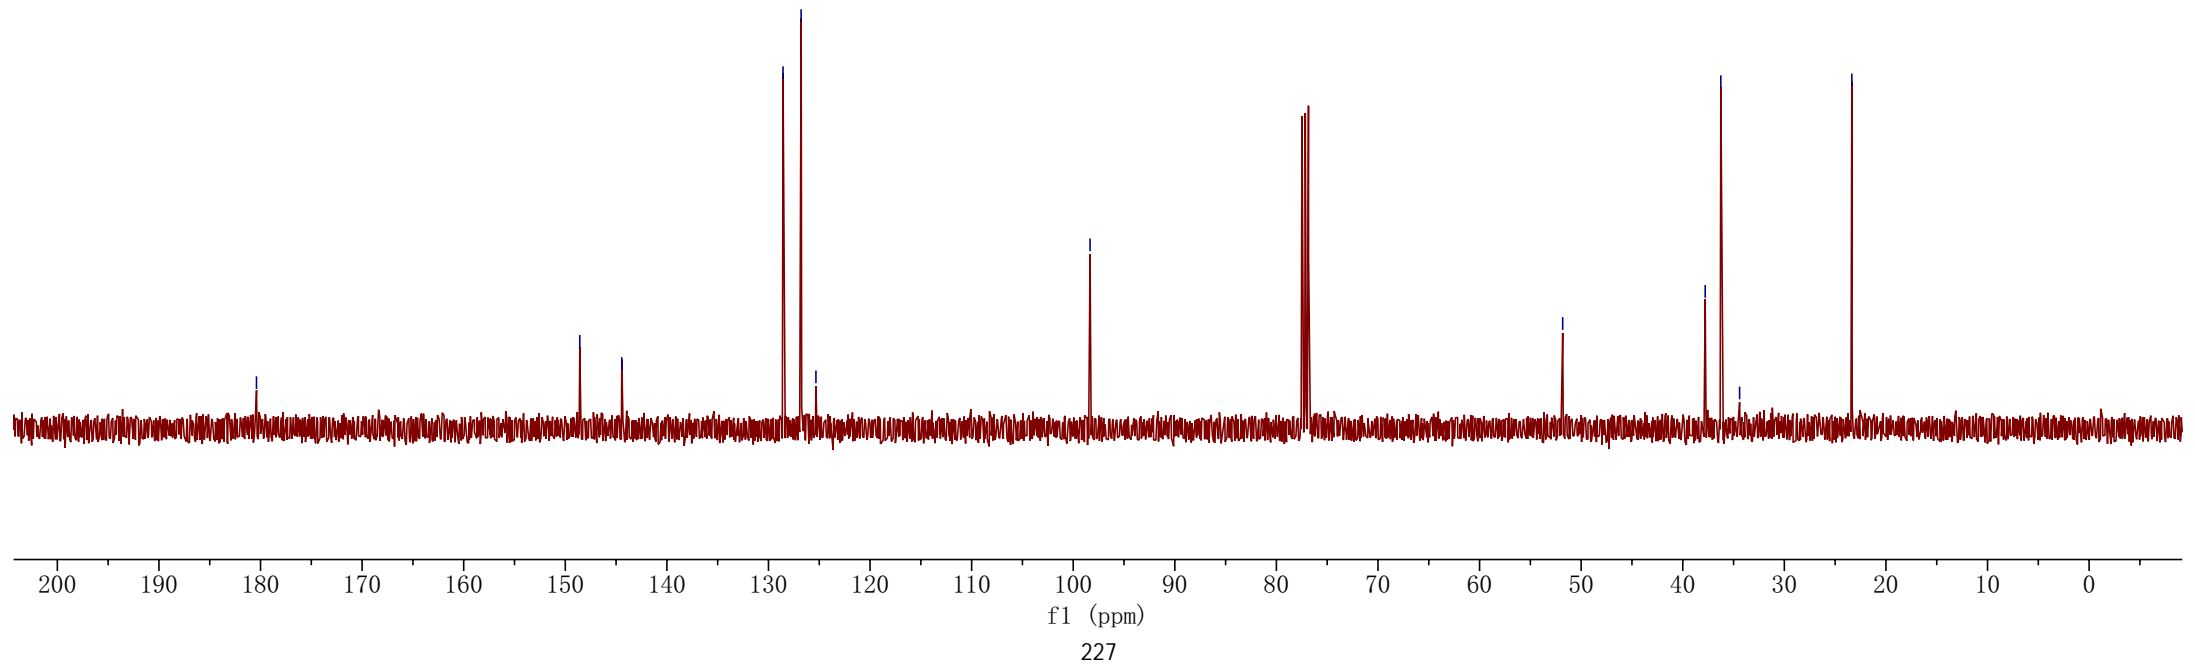

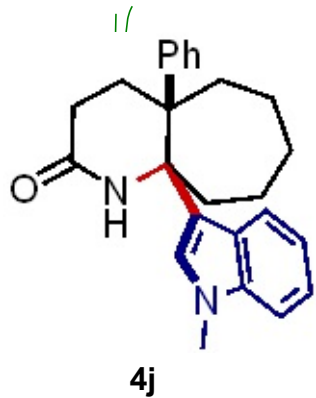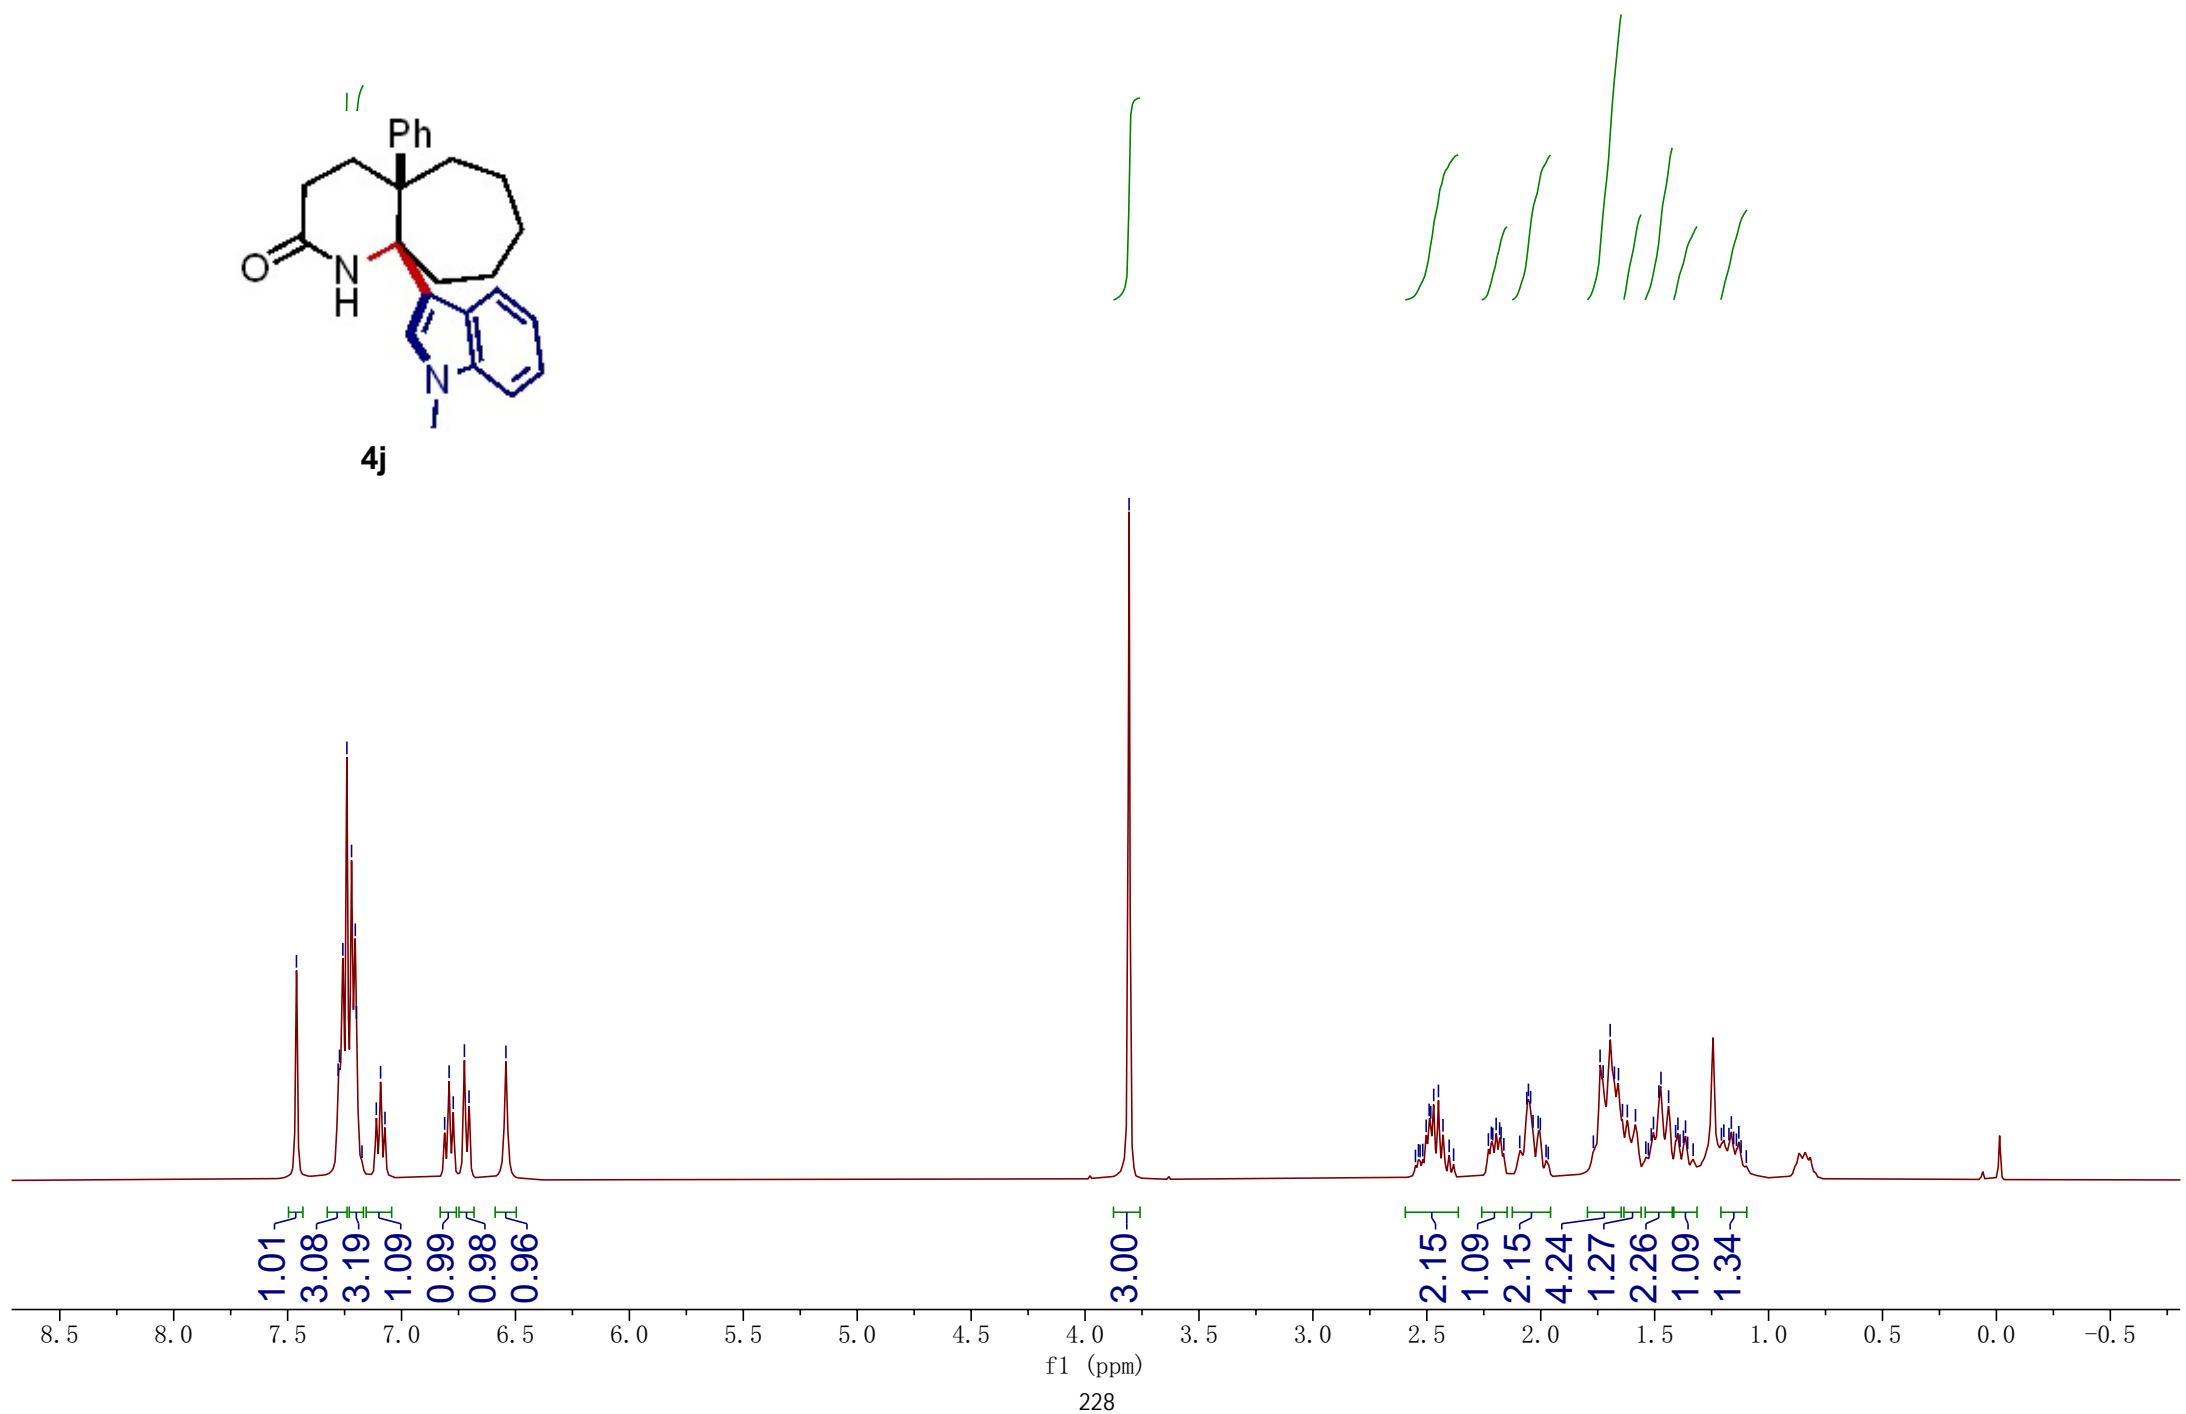

-172.60

-143.74

-128.89

127.60

127.33

126.99

126.64

122.02

121.15

119.66

116.41

109.43

-70.00

39.90

33.08

31.17

29.06

27.73

25.97

22.96

22.06

21.65

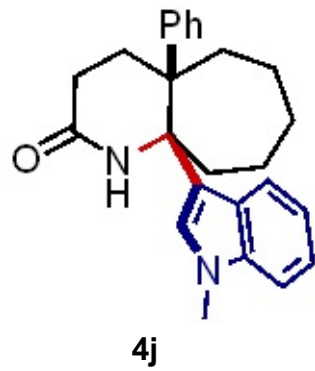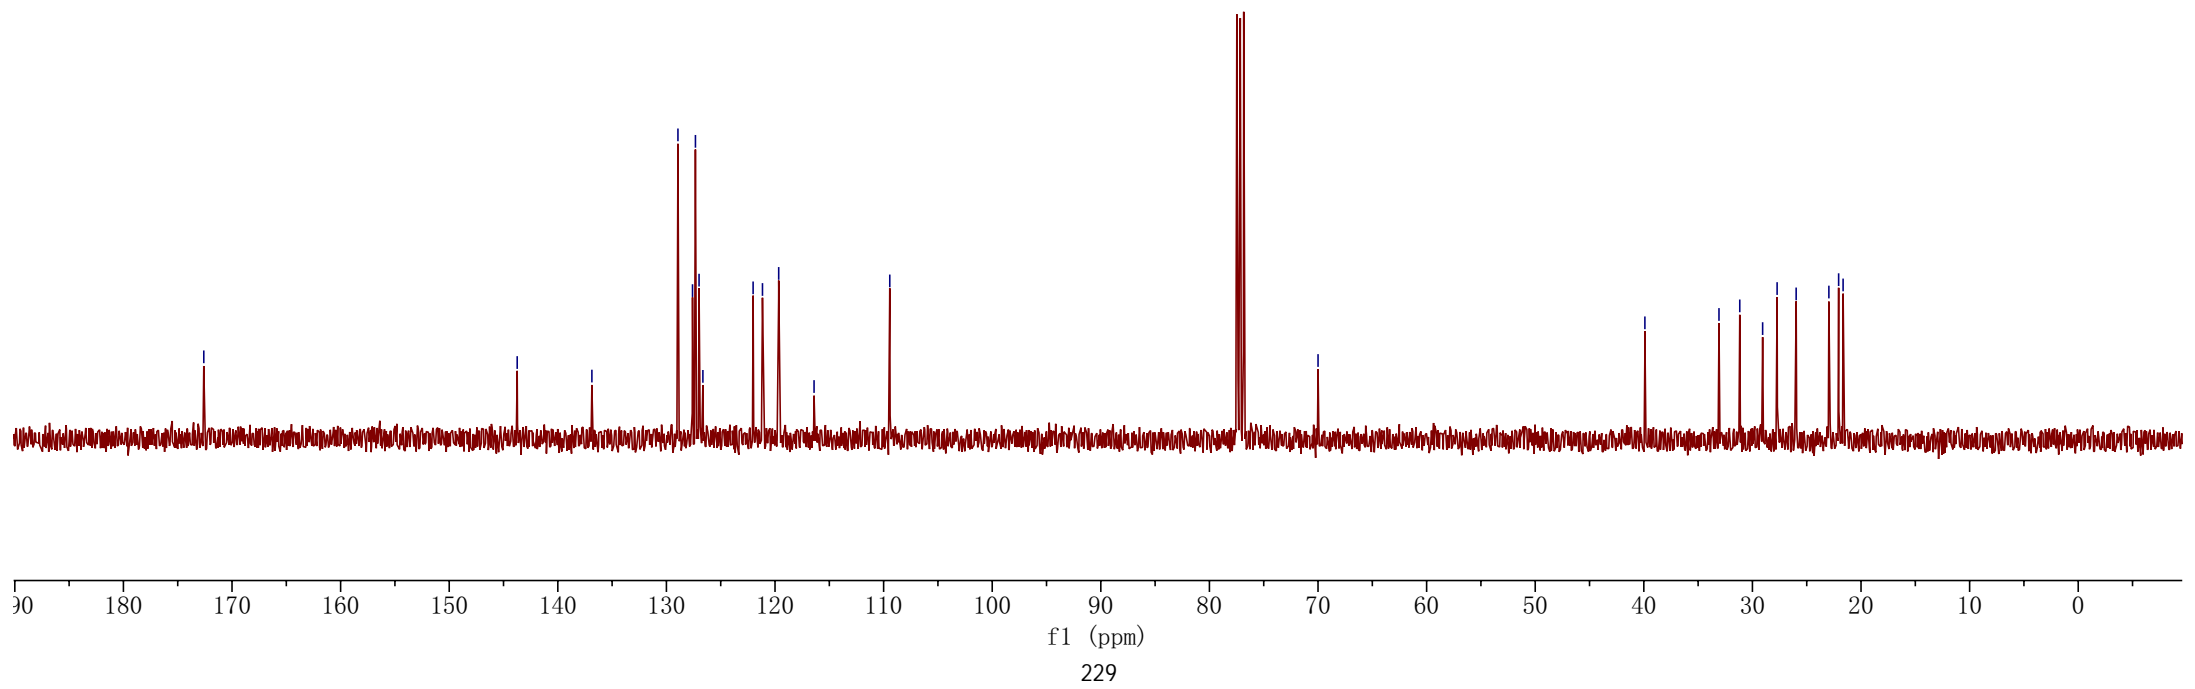

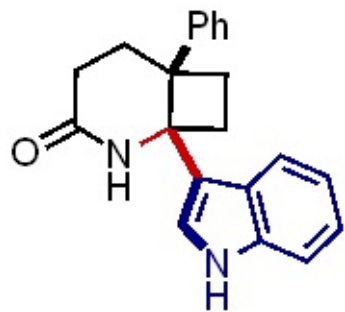

5a

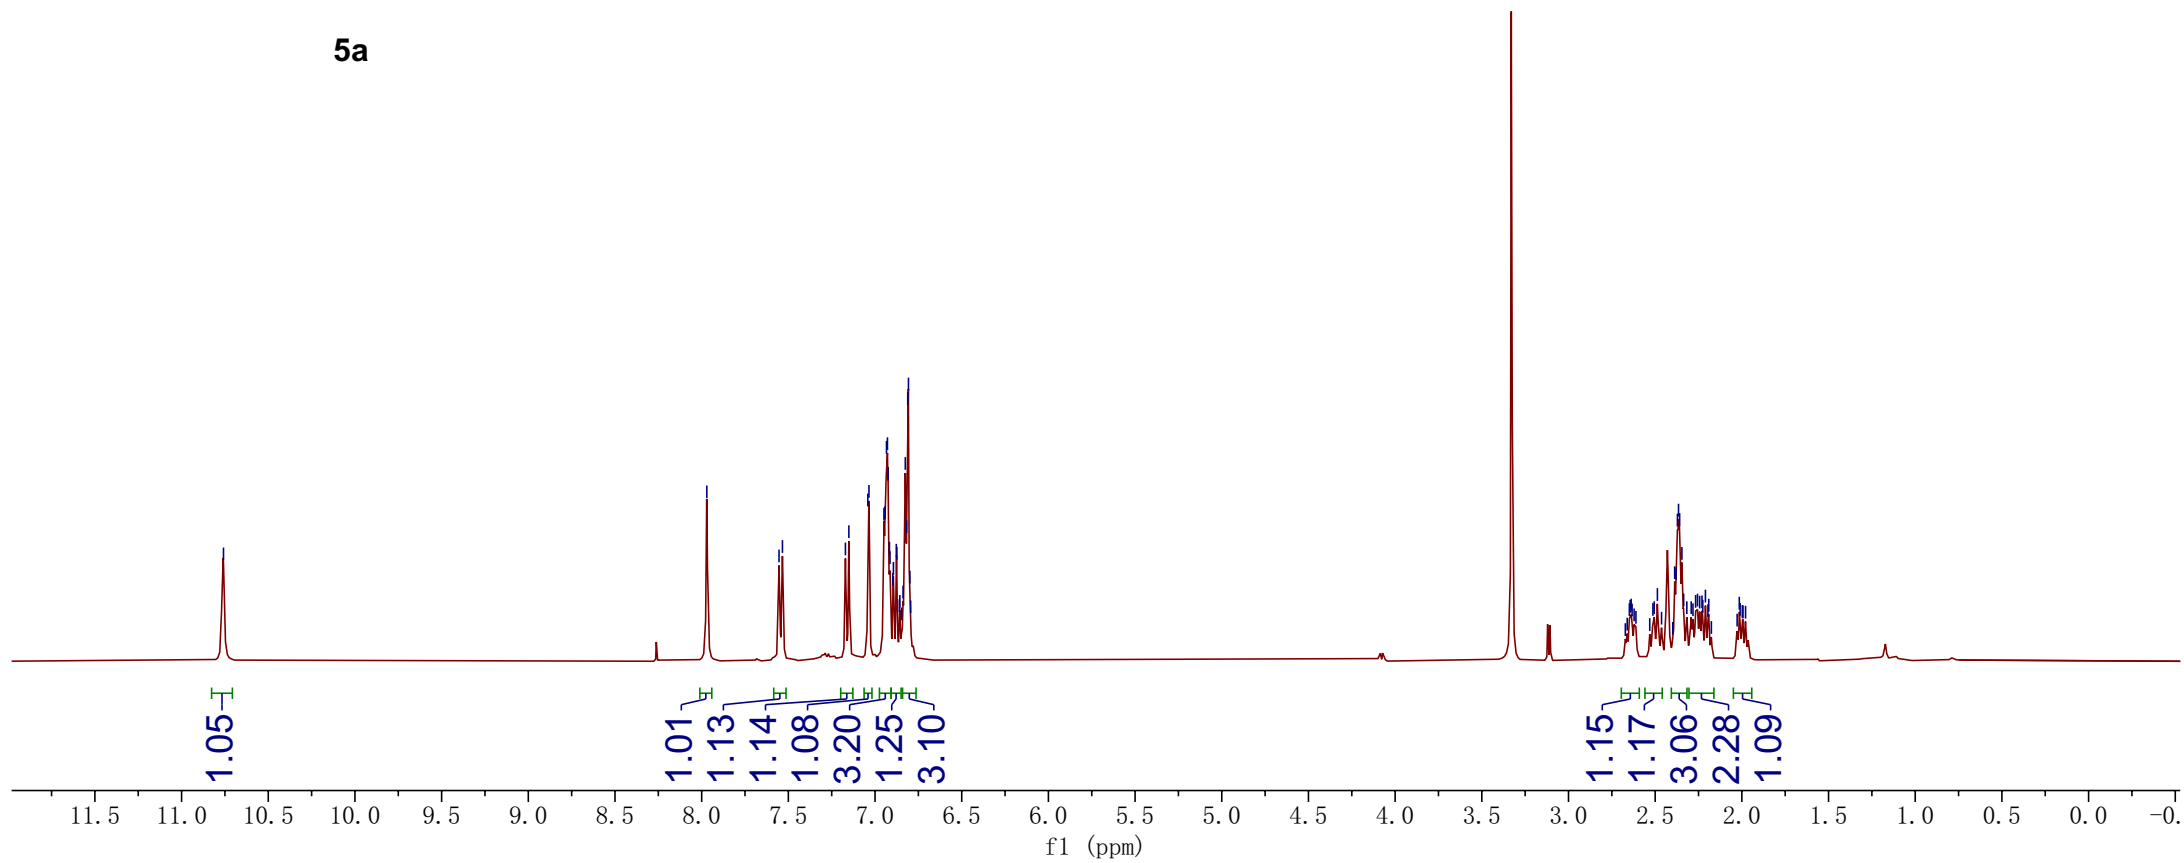

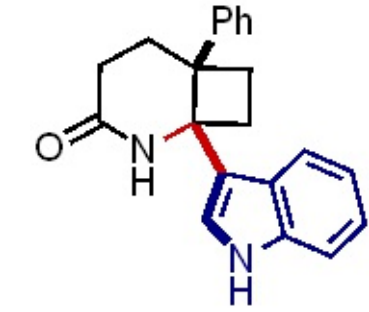

5a

—171.14  
—145.56  
—136.44  
—127.10  
—126.31  
—126.29  
—125.36  
—123.39  
—120.58  
—120.39  
—118.50  
—117.22  
—111.50

—61.85

—49.73

—34.85  
—34.55  
—28.56  
—25.75

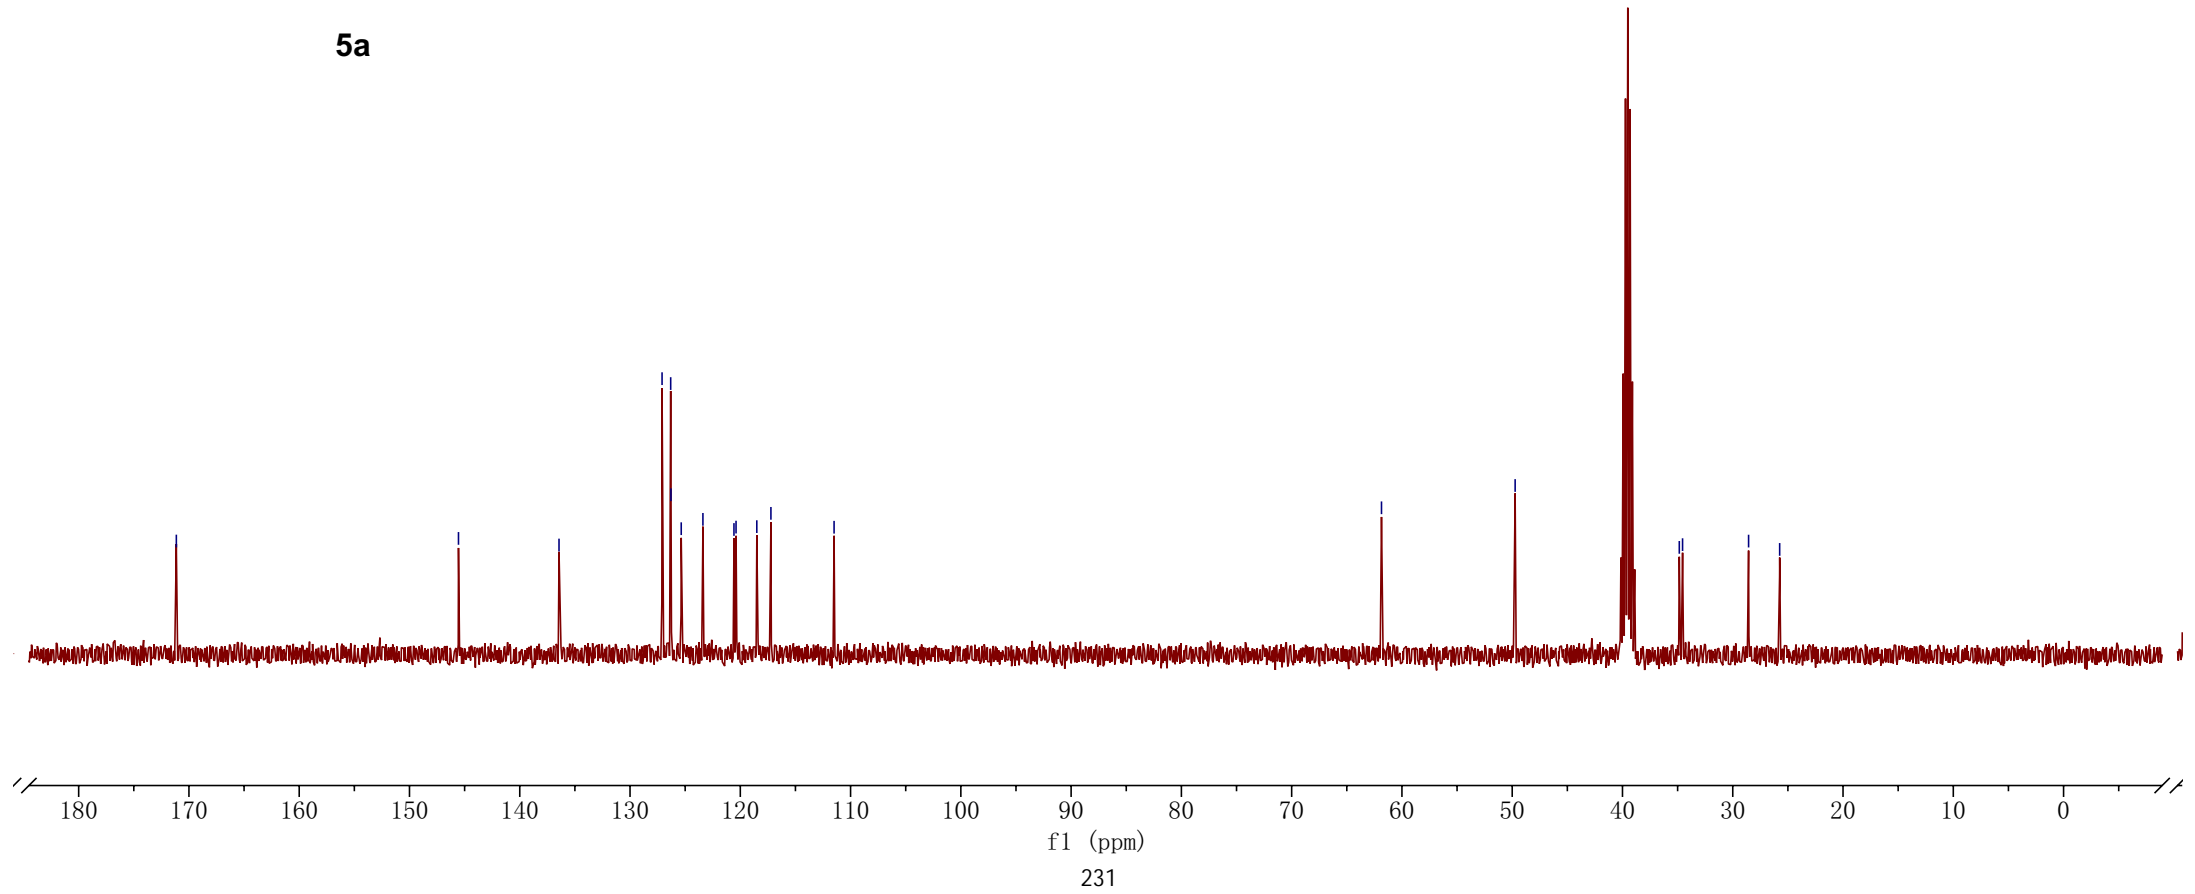

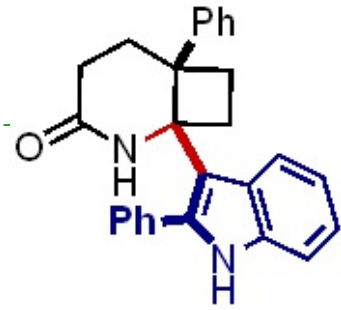

5b

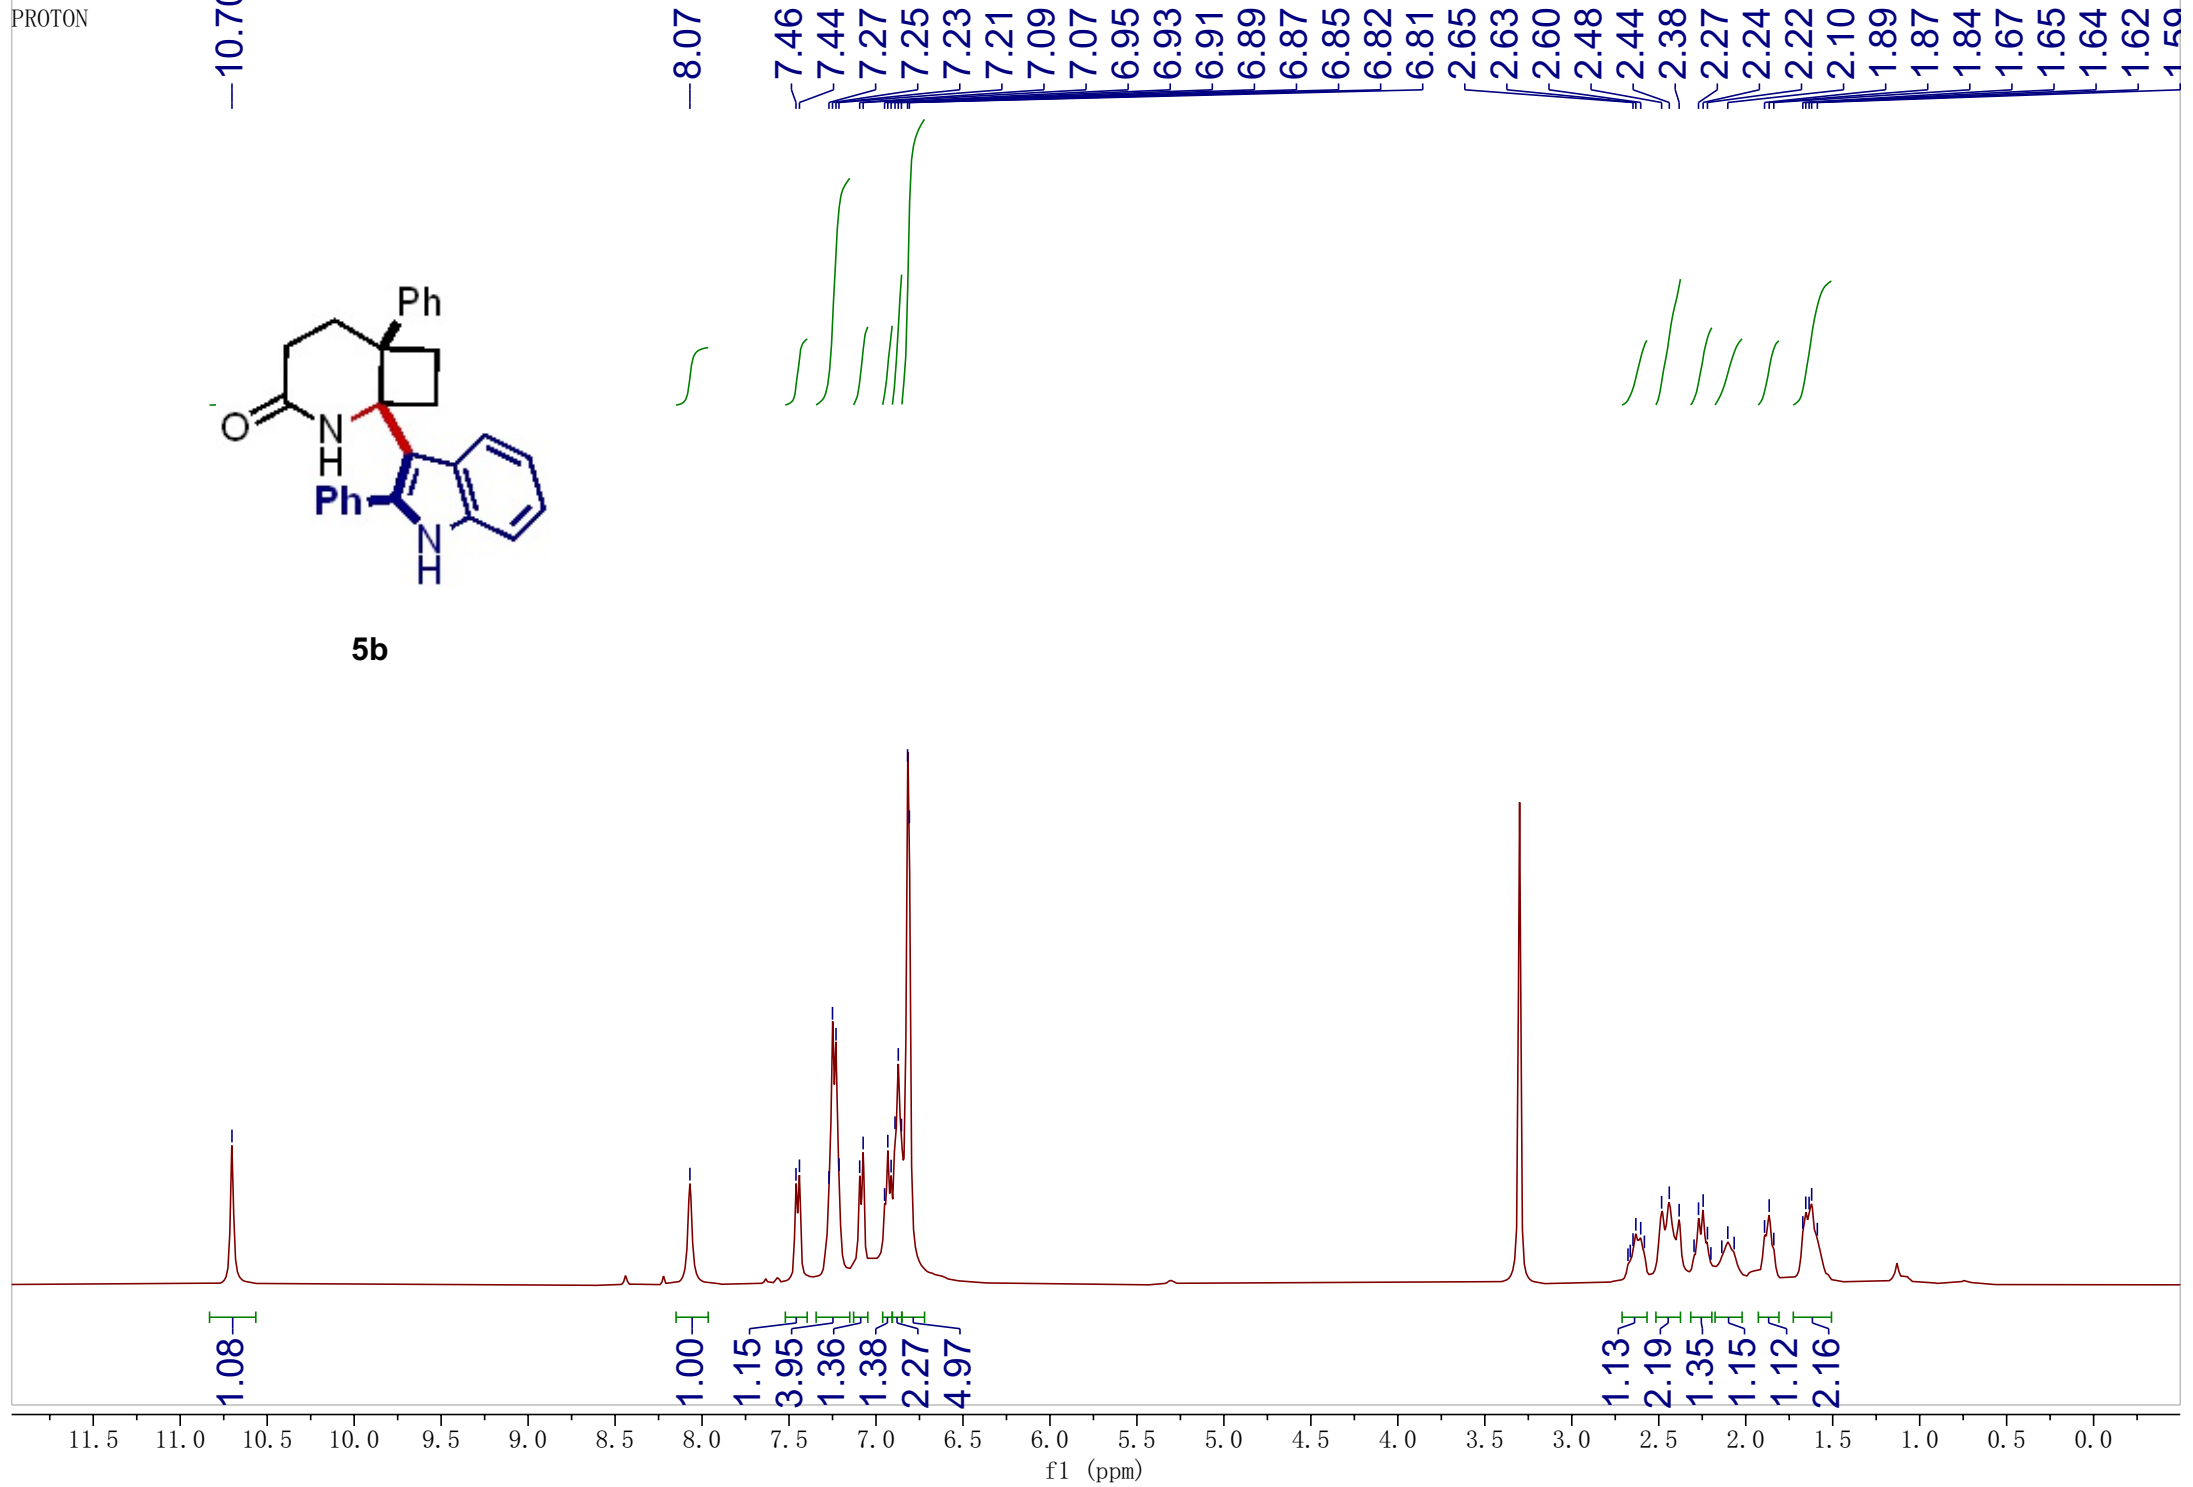

—169.82  
143.42  
136.68  
135.47  
134.30  
128.12  
127.74  
127.40  
127.30  
126.98  
126.57  
125.69  
120.98  
120.51  
118.73  
113.23  
110.89

—63.76

—49.90

36.12  
33.34  
29.99  
28.75

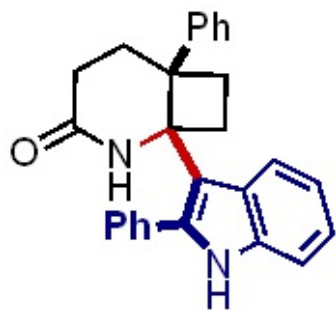

5b

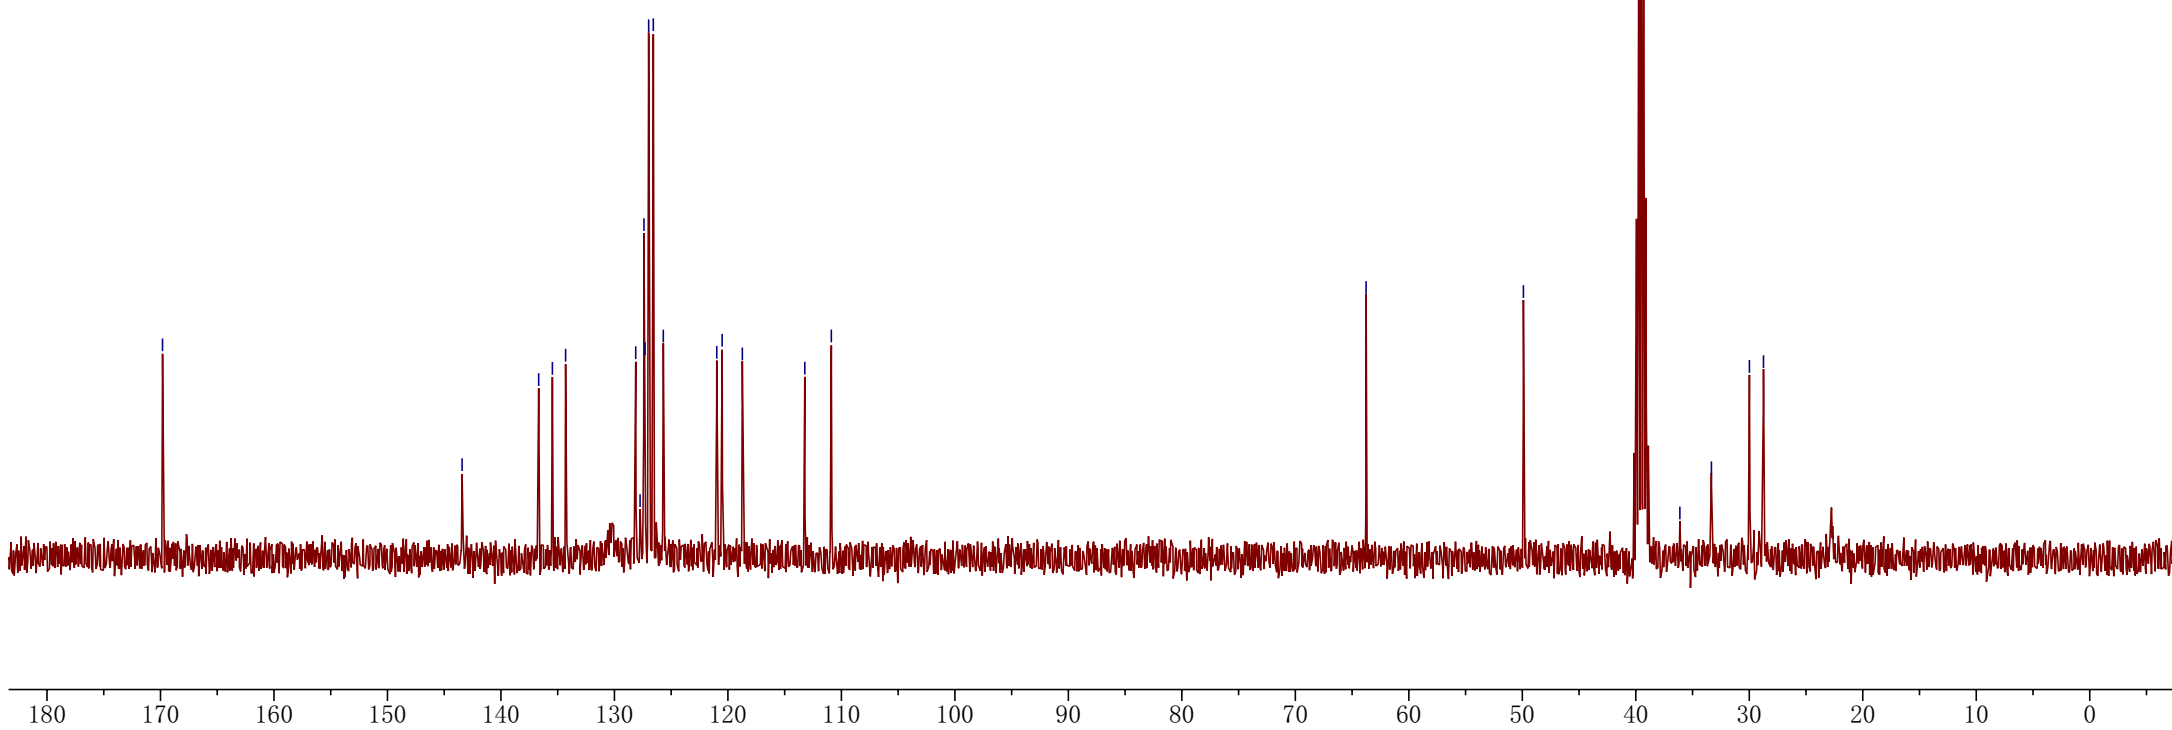

f1 (ppm)

233

f1 - 7.671 - f1d  
POTON

7.35 7.33 7.29 7.29 7.28 7.09 7.07 7.06 6.95 6.93 6.89 6.87 6.85 2.69 2.69 2.68 2.67 2.66 2.65 2.64 2.64 2.63 2.61 2.58 2.57 2.55 2.52 2.42 2.41 2.39 2.39 2.37 2.37 2.36 2.35 2.34 2.32 2.31 2.30 2.29 2.07 2.06 2.05 2.04 2.03 2.02 1.93 1.92 1.91 1.90 1.88

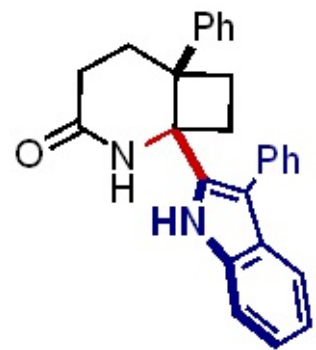

5c

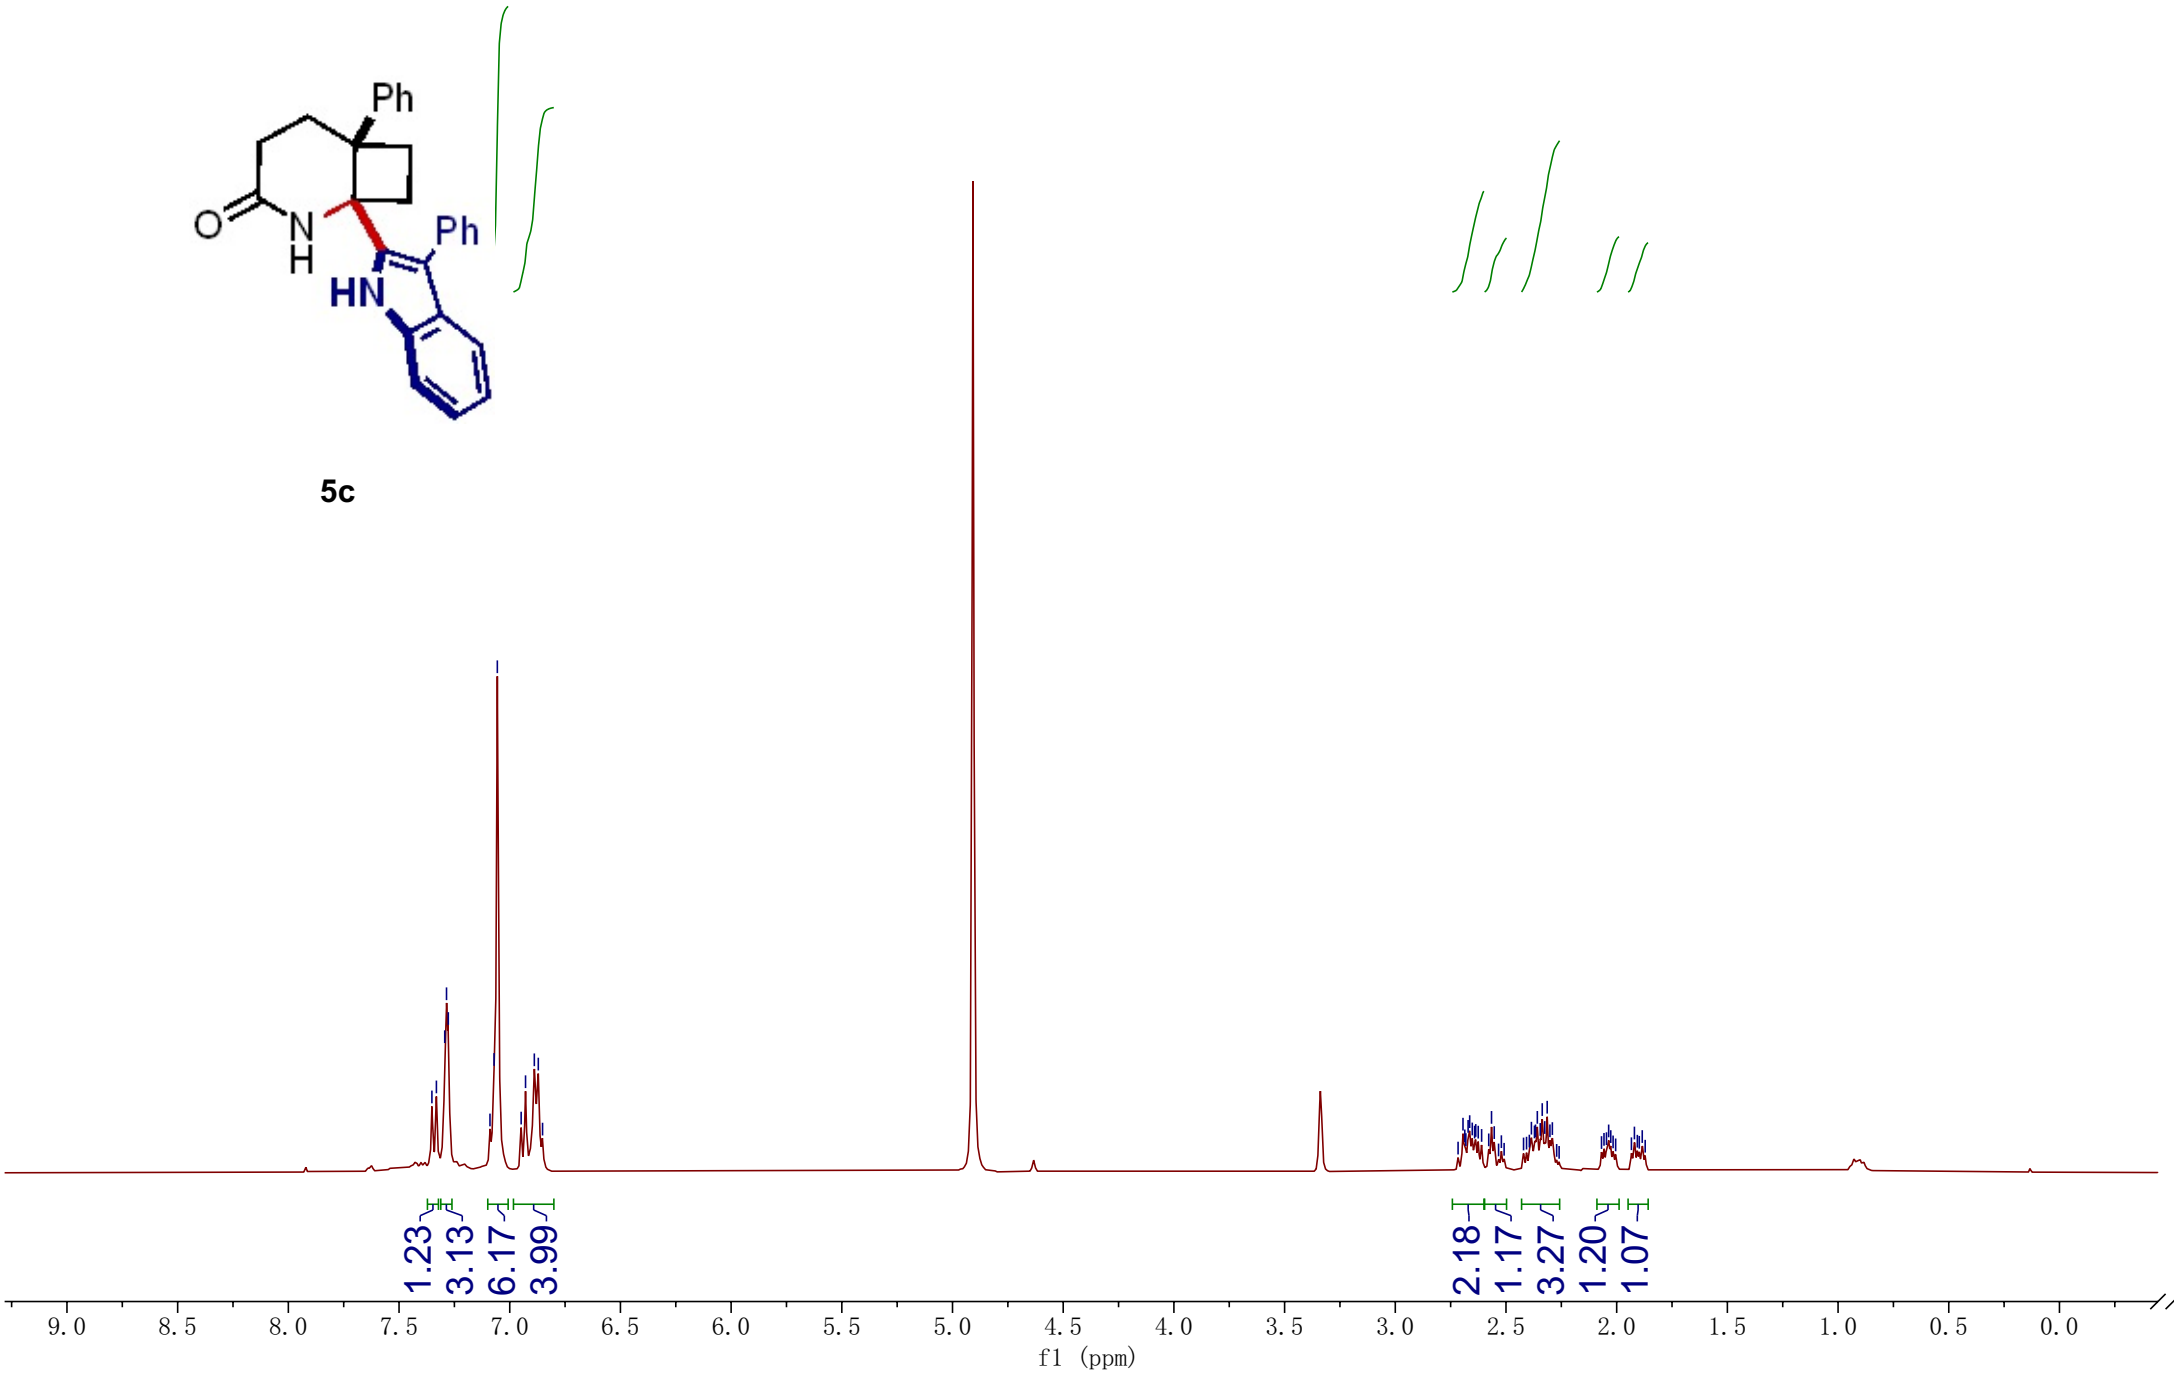

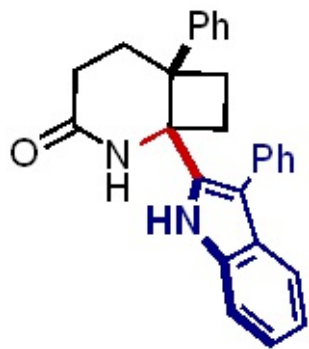

5c

174.57  
144.47  
136.89  
136.33  
134.42  
132.38  
130.87  
129.86  
129.36  
128.73  
128.57  
127.69  
127.63  
127.30  
122.91  
120.05  
119.73  
117.83  
111.65

65.45

51.76

33.49  
32.42  
29.46  
24.72

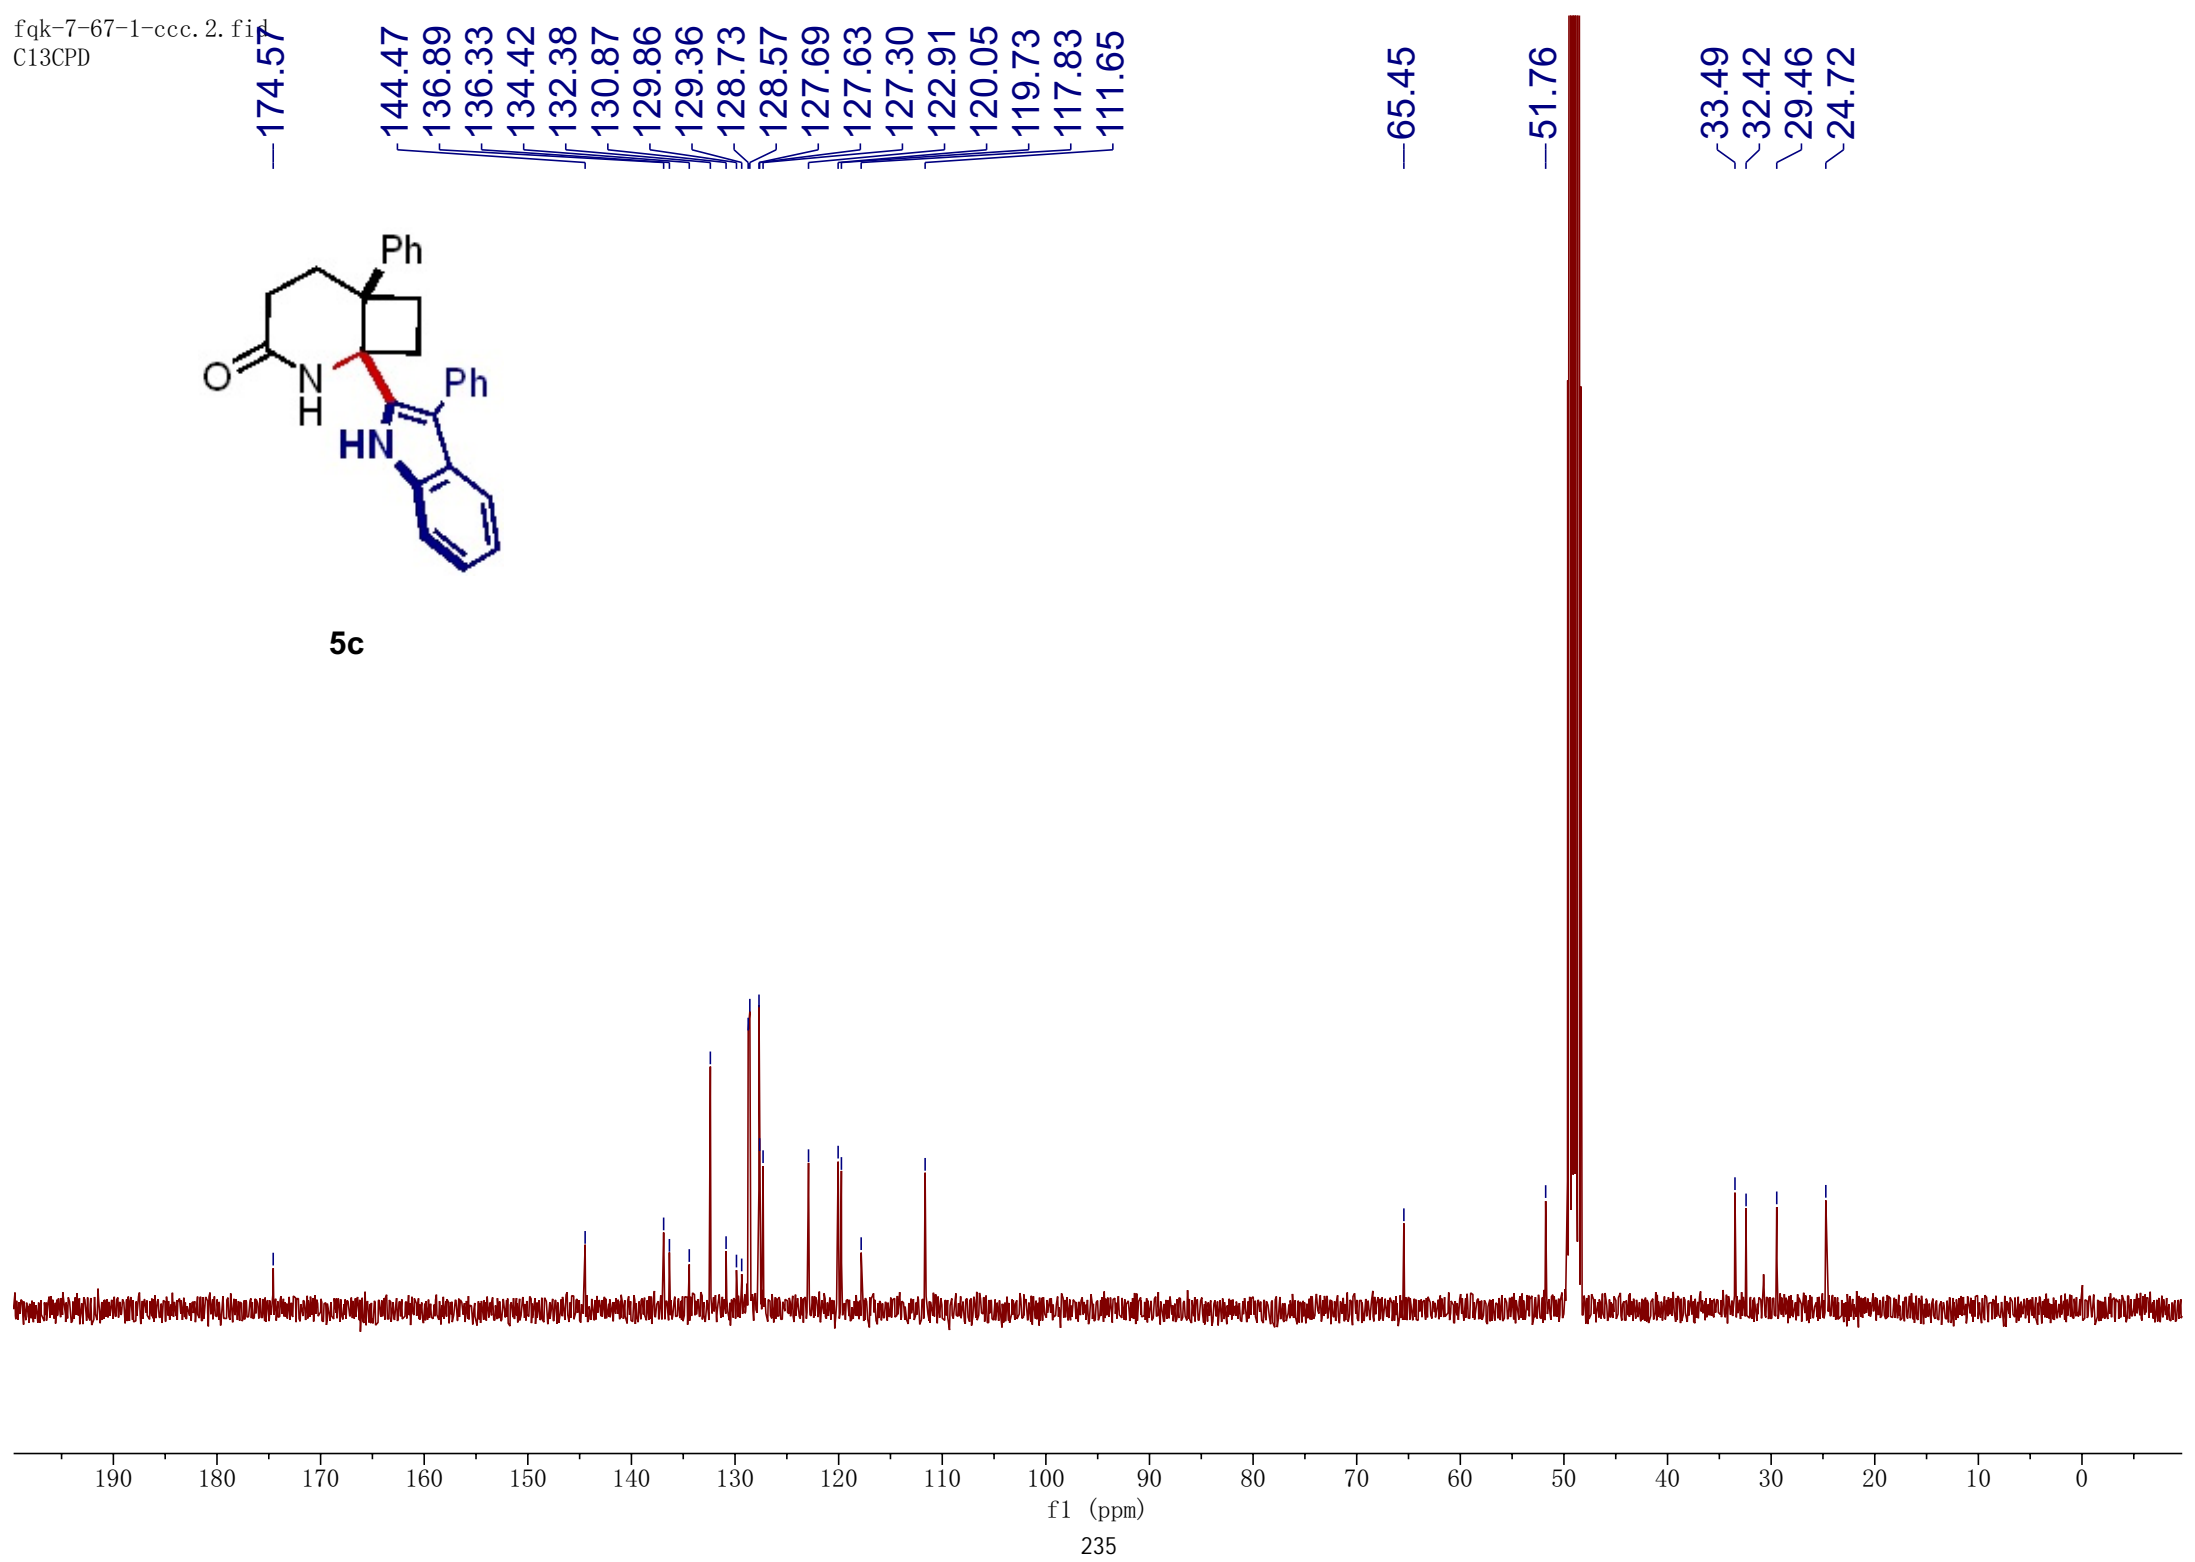

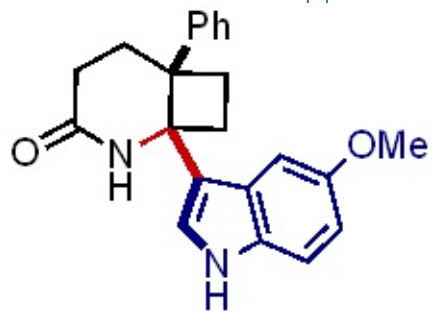

5d

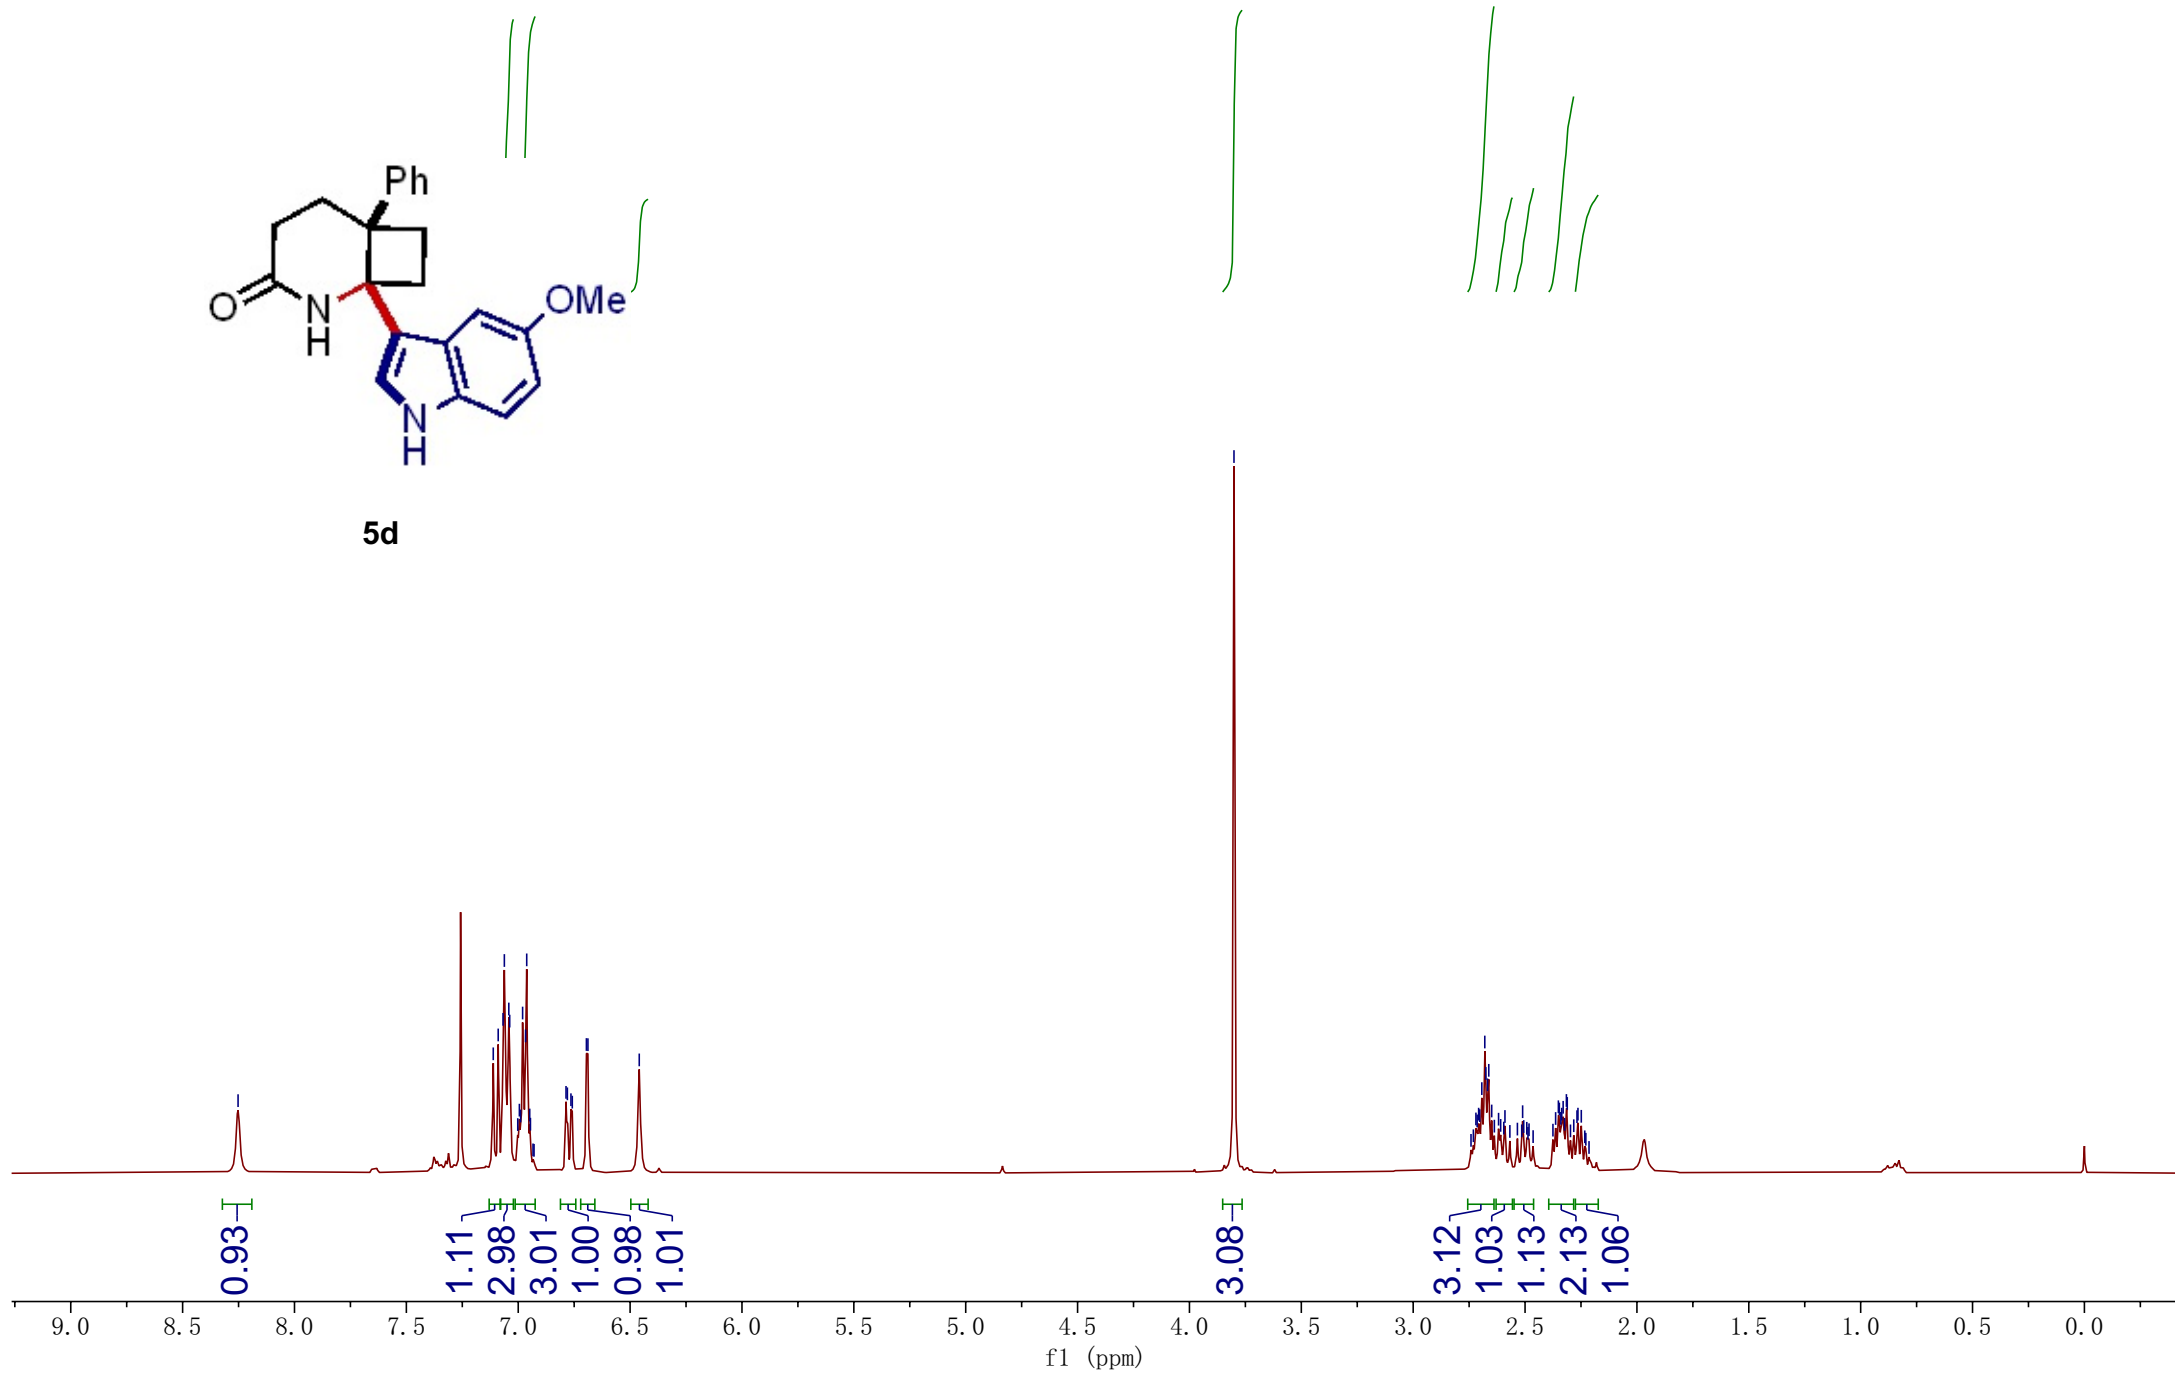

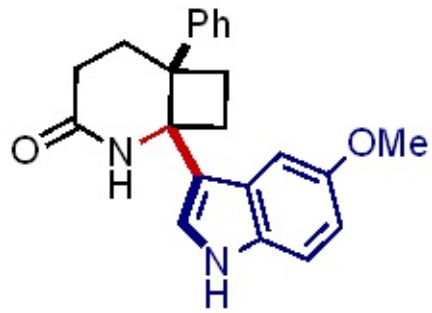

5d

—173.24  
—154.00  
—144.70  
131.73  
127.56  
126.57  
126.20  
126.08  
123.08  
117.43  
112.30  
112.23  
—102.36

62.67  
56.05  
50.41

35.17  
34.69  
29.12  
25.73

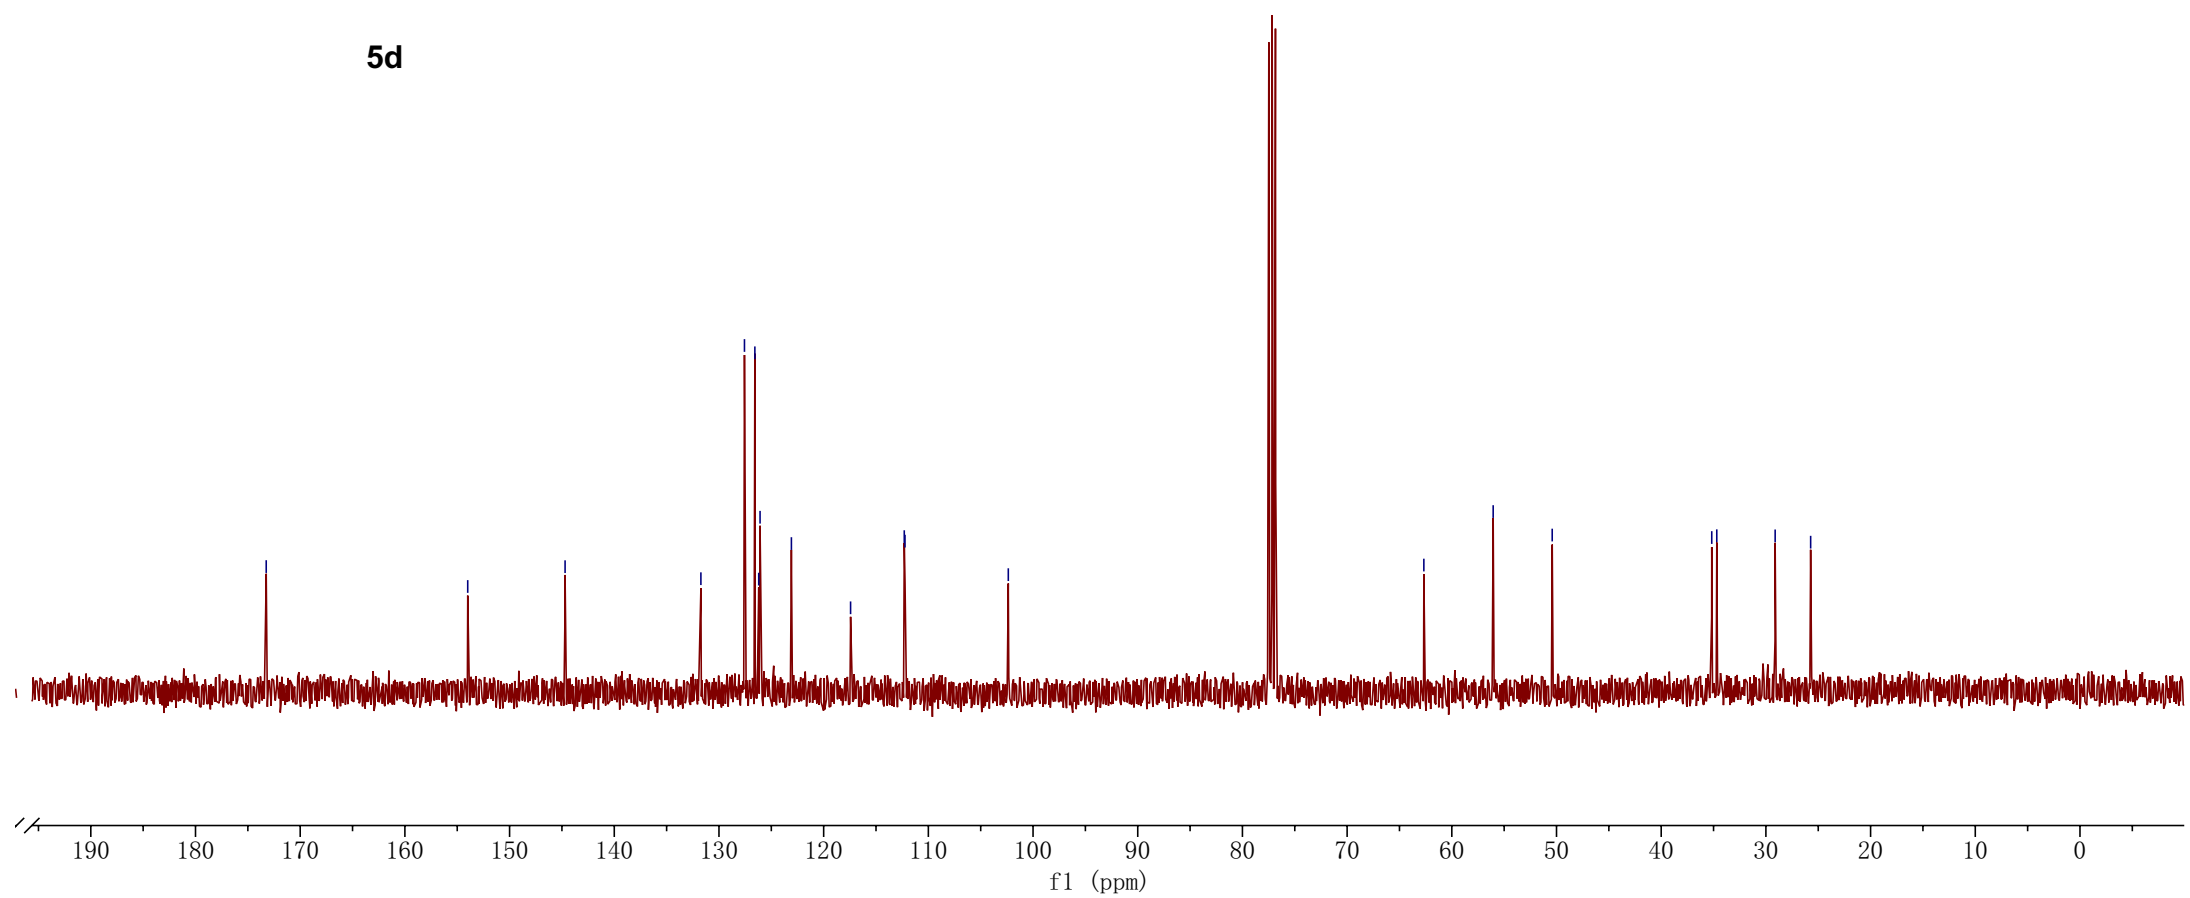

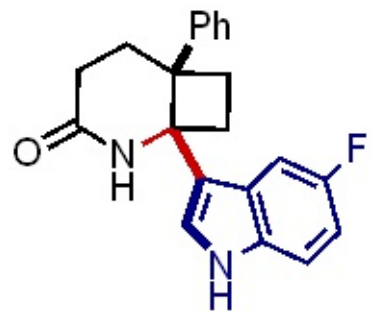

5e

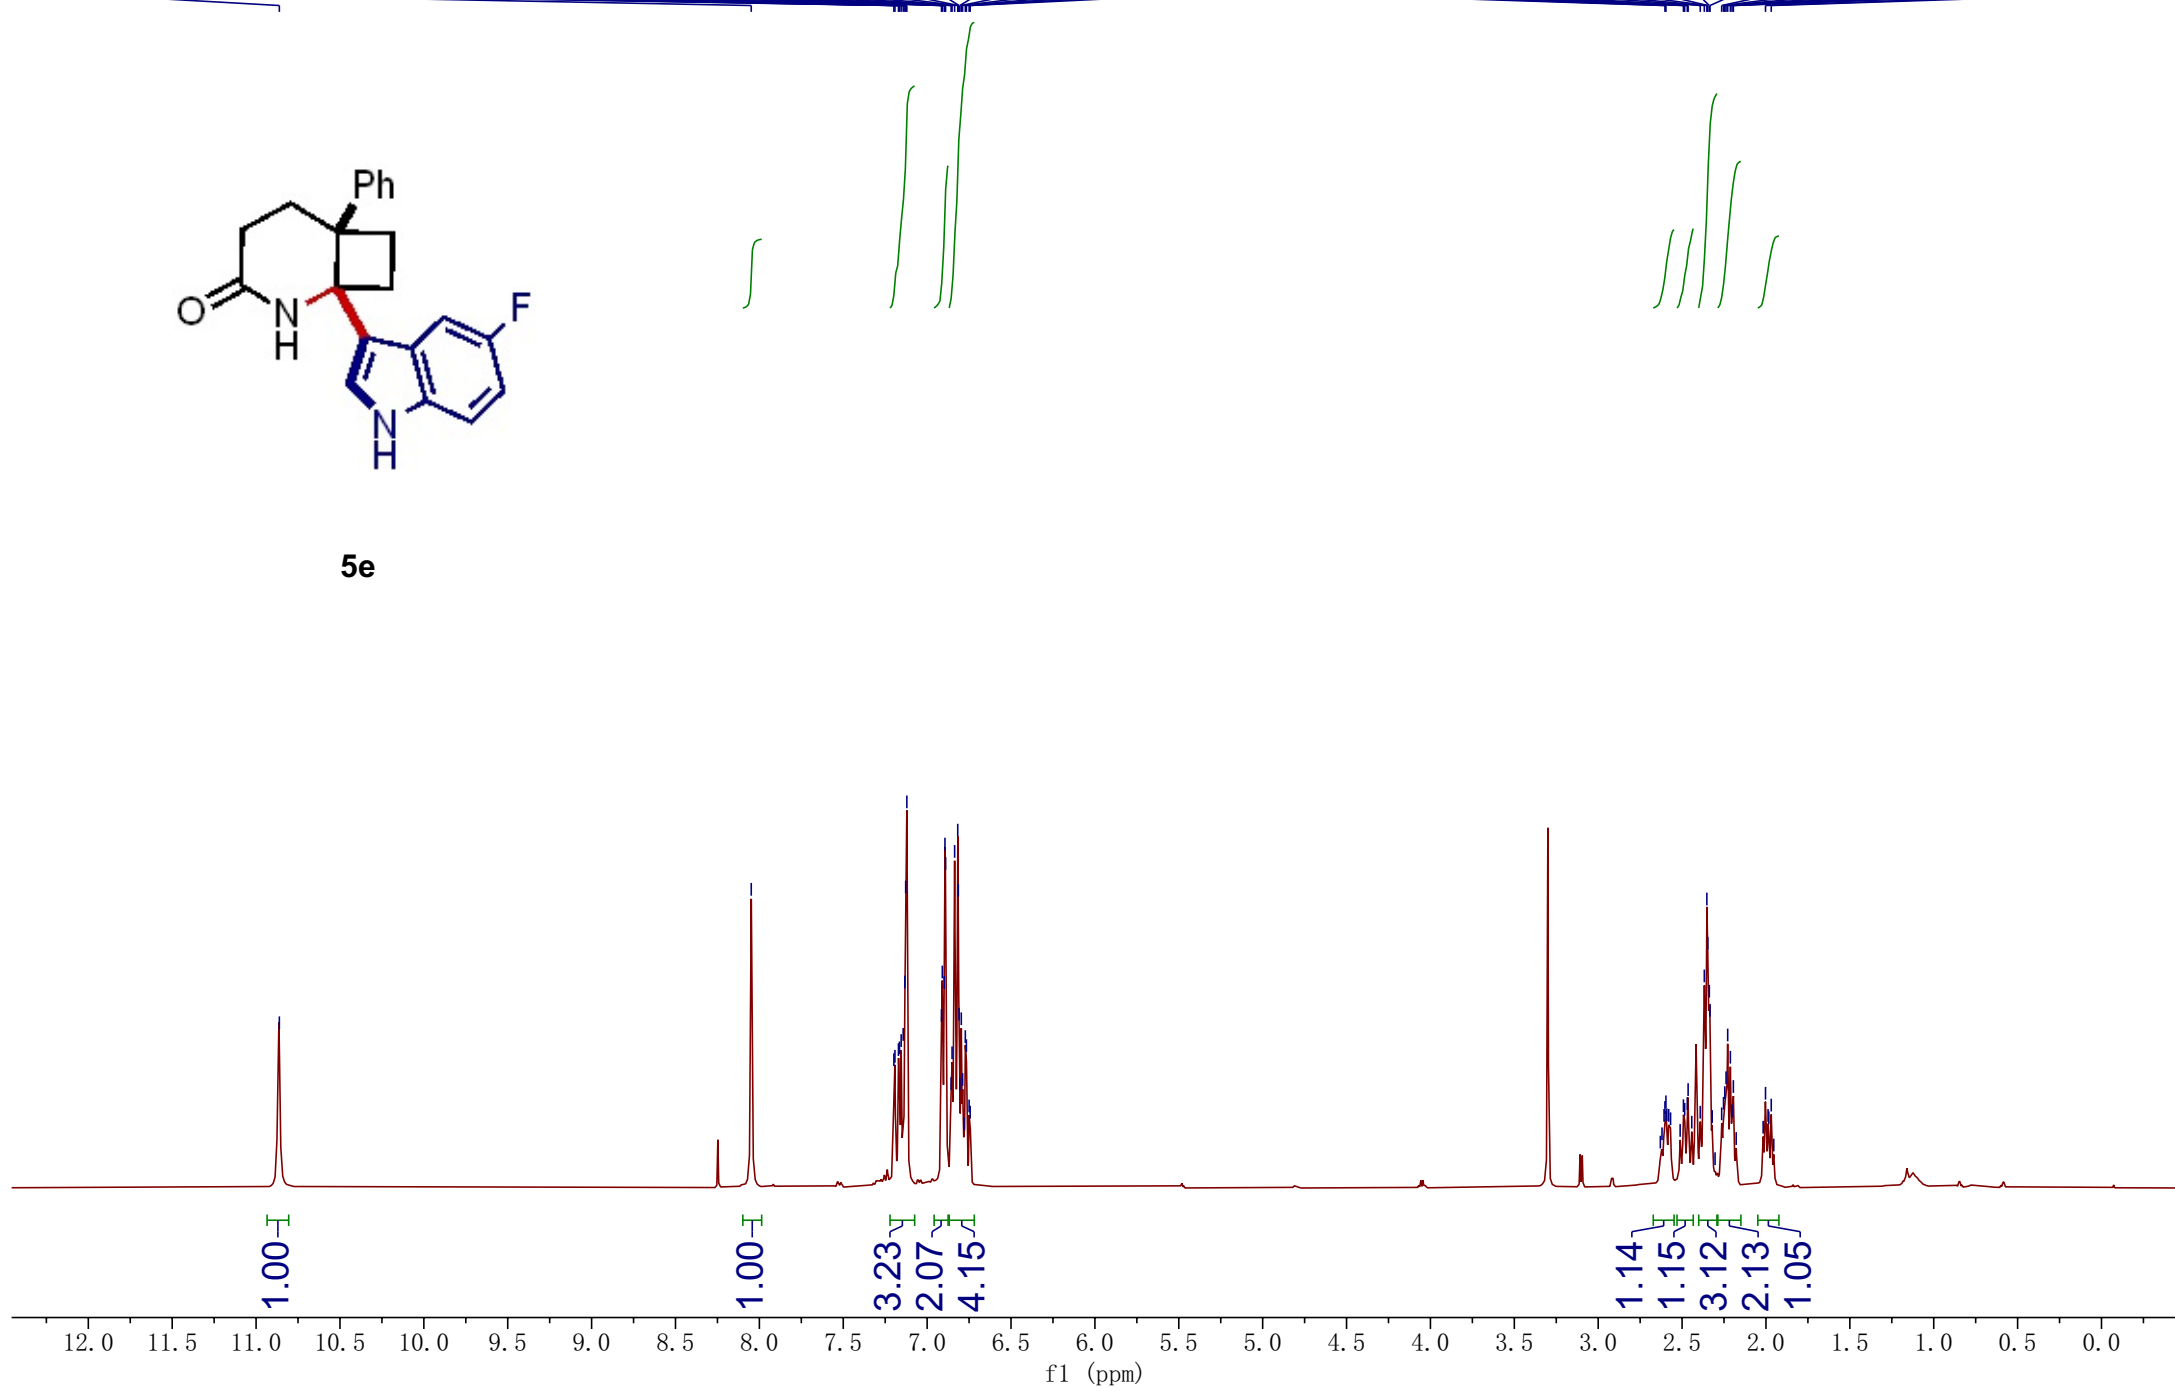

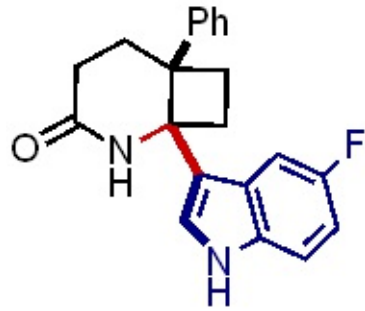

5e

171.32  
157.52  
155.23  
145.44  
133.04  
127.12  
126.47  
126.37  
126.27  
125.39  
117.54  
117.50  
112.35  
112.25  
108.84  
108.58  
105.12  
104.88

61.62

49.72

34.90  
34.42  
28.51  
25.83

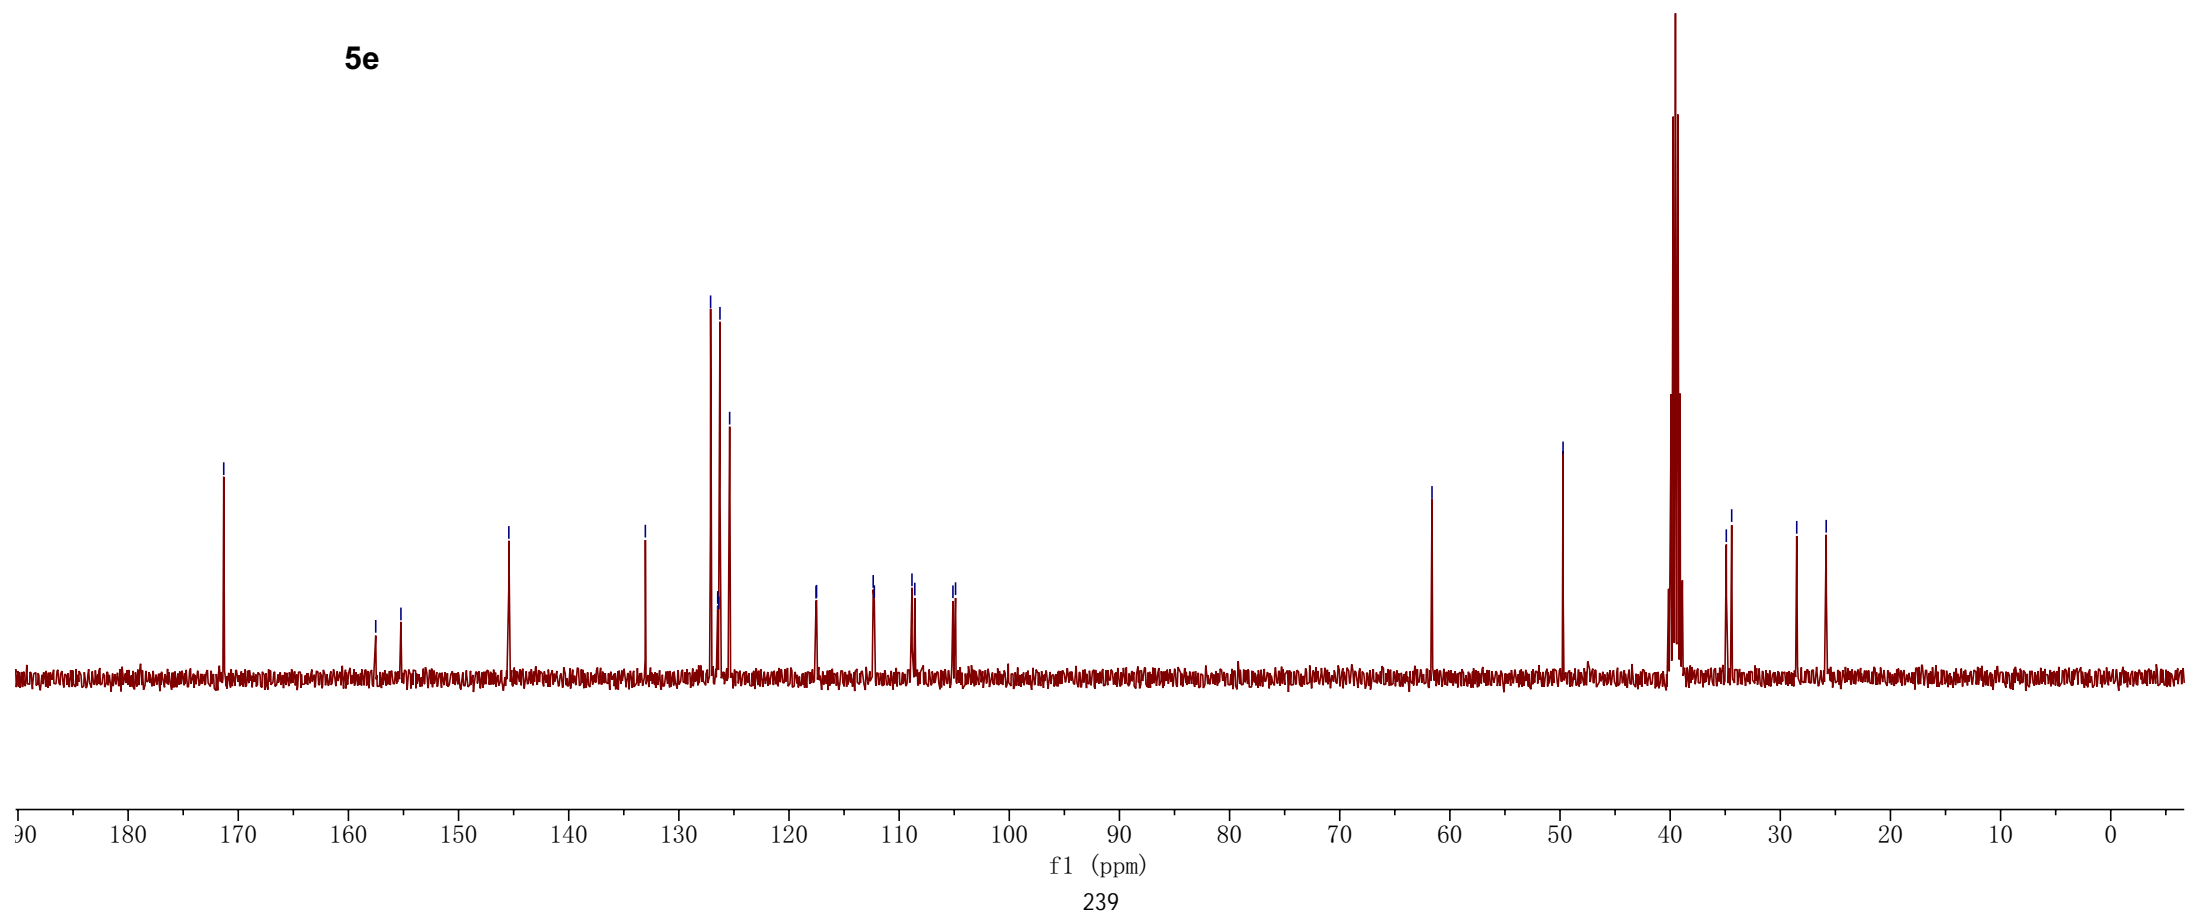

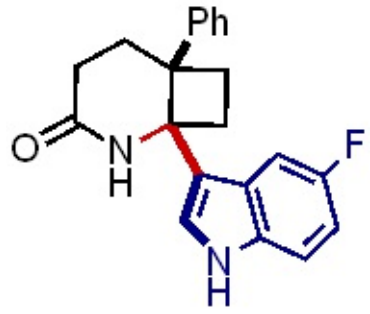

5e

--124.88

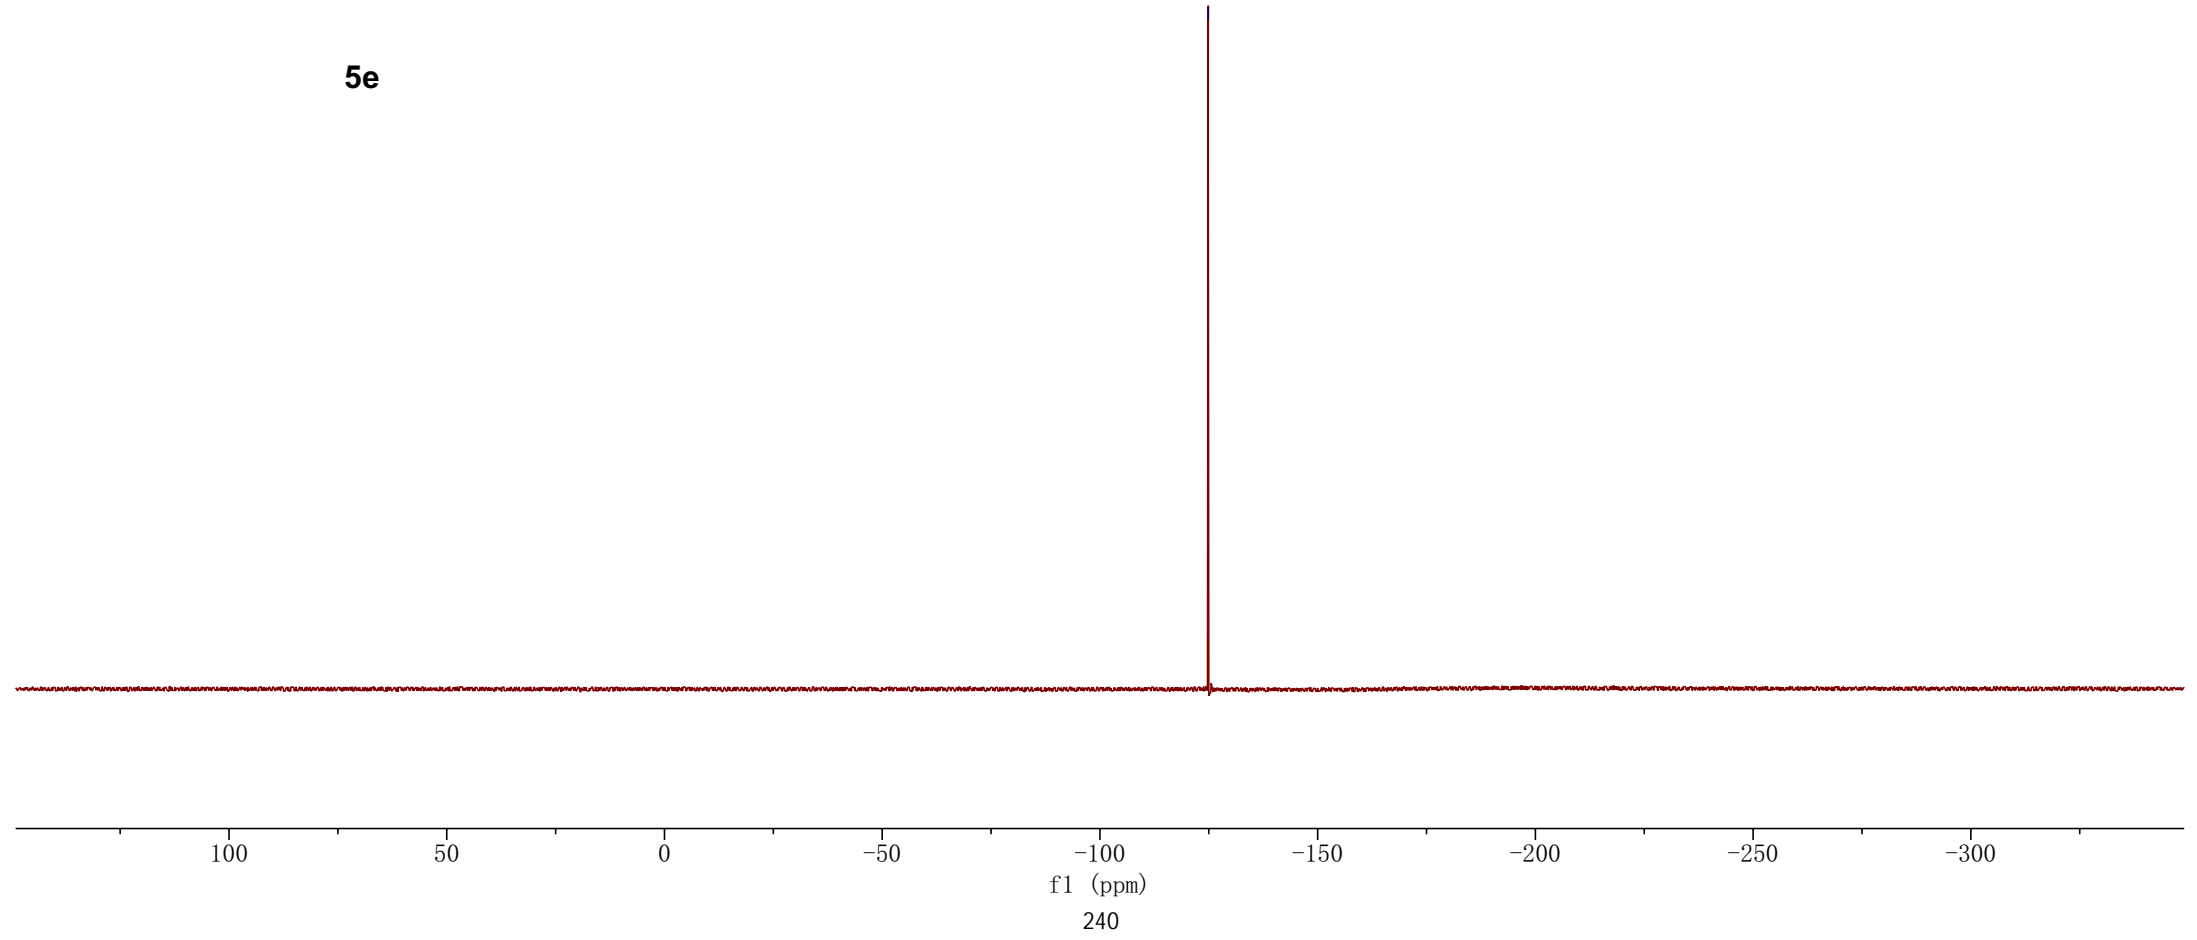

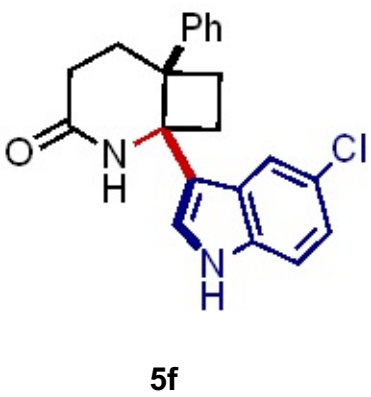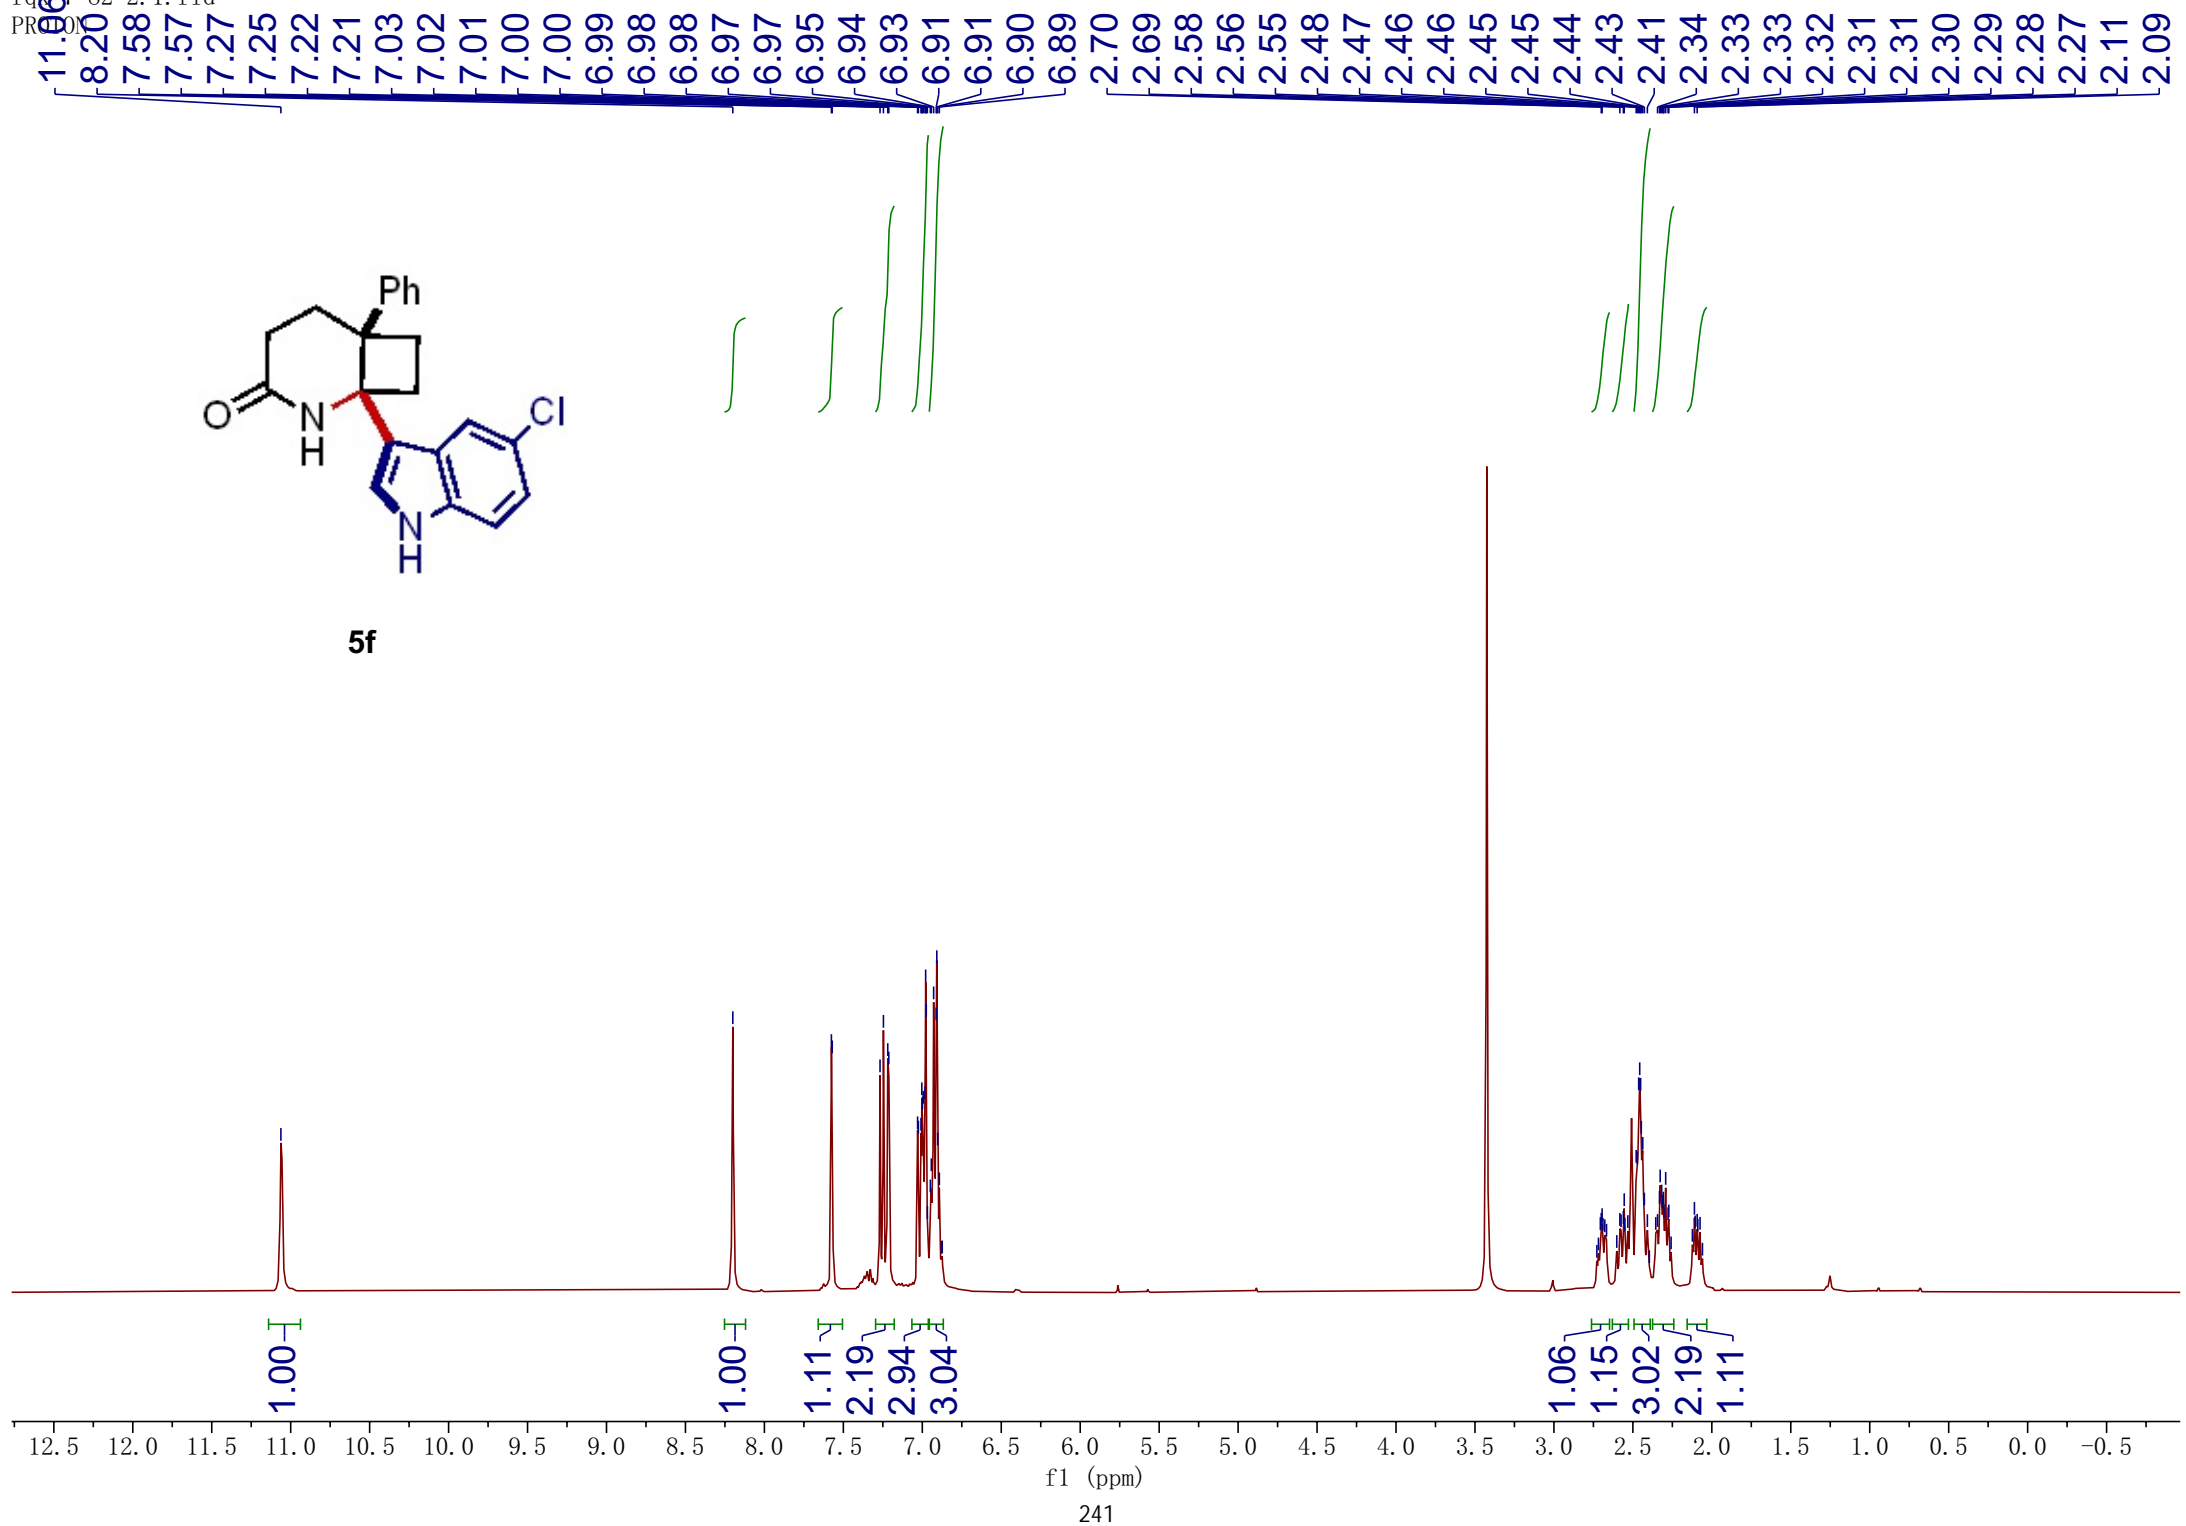

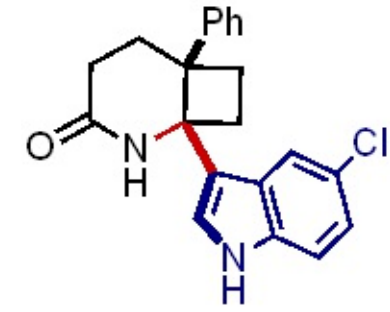

5f

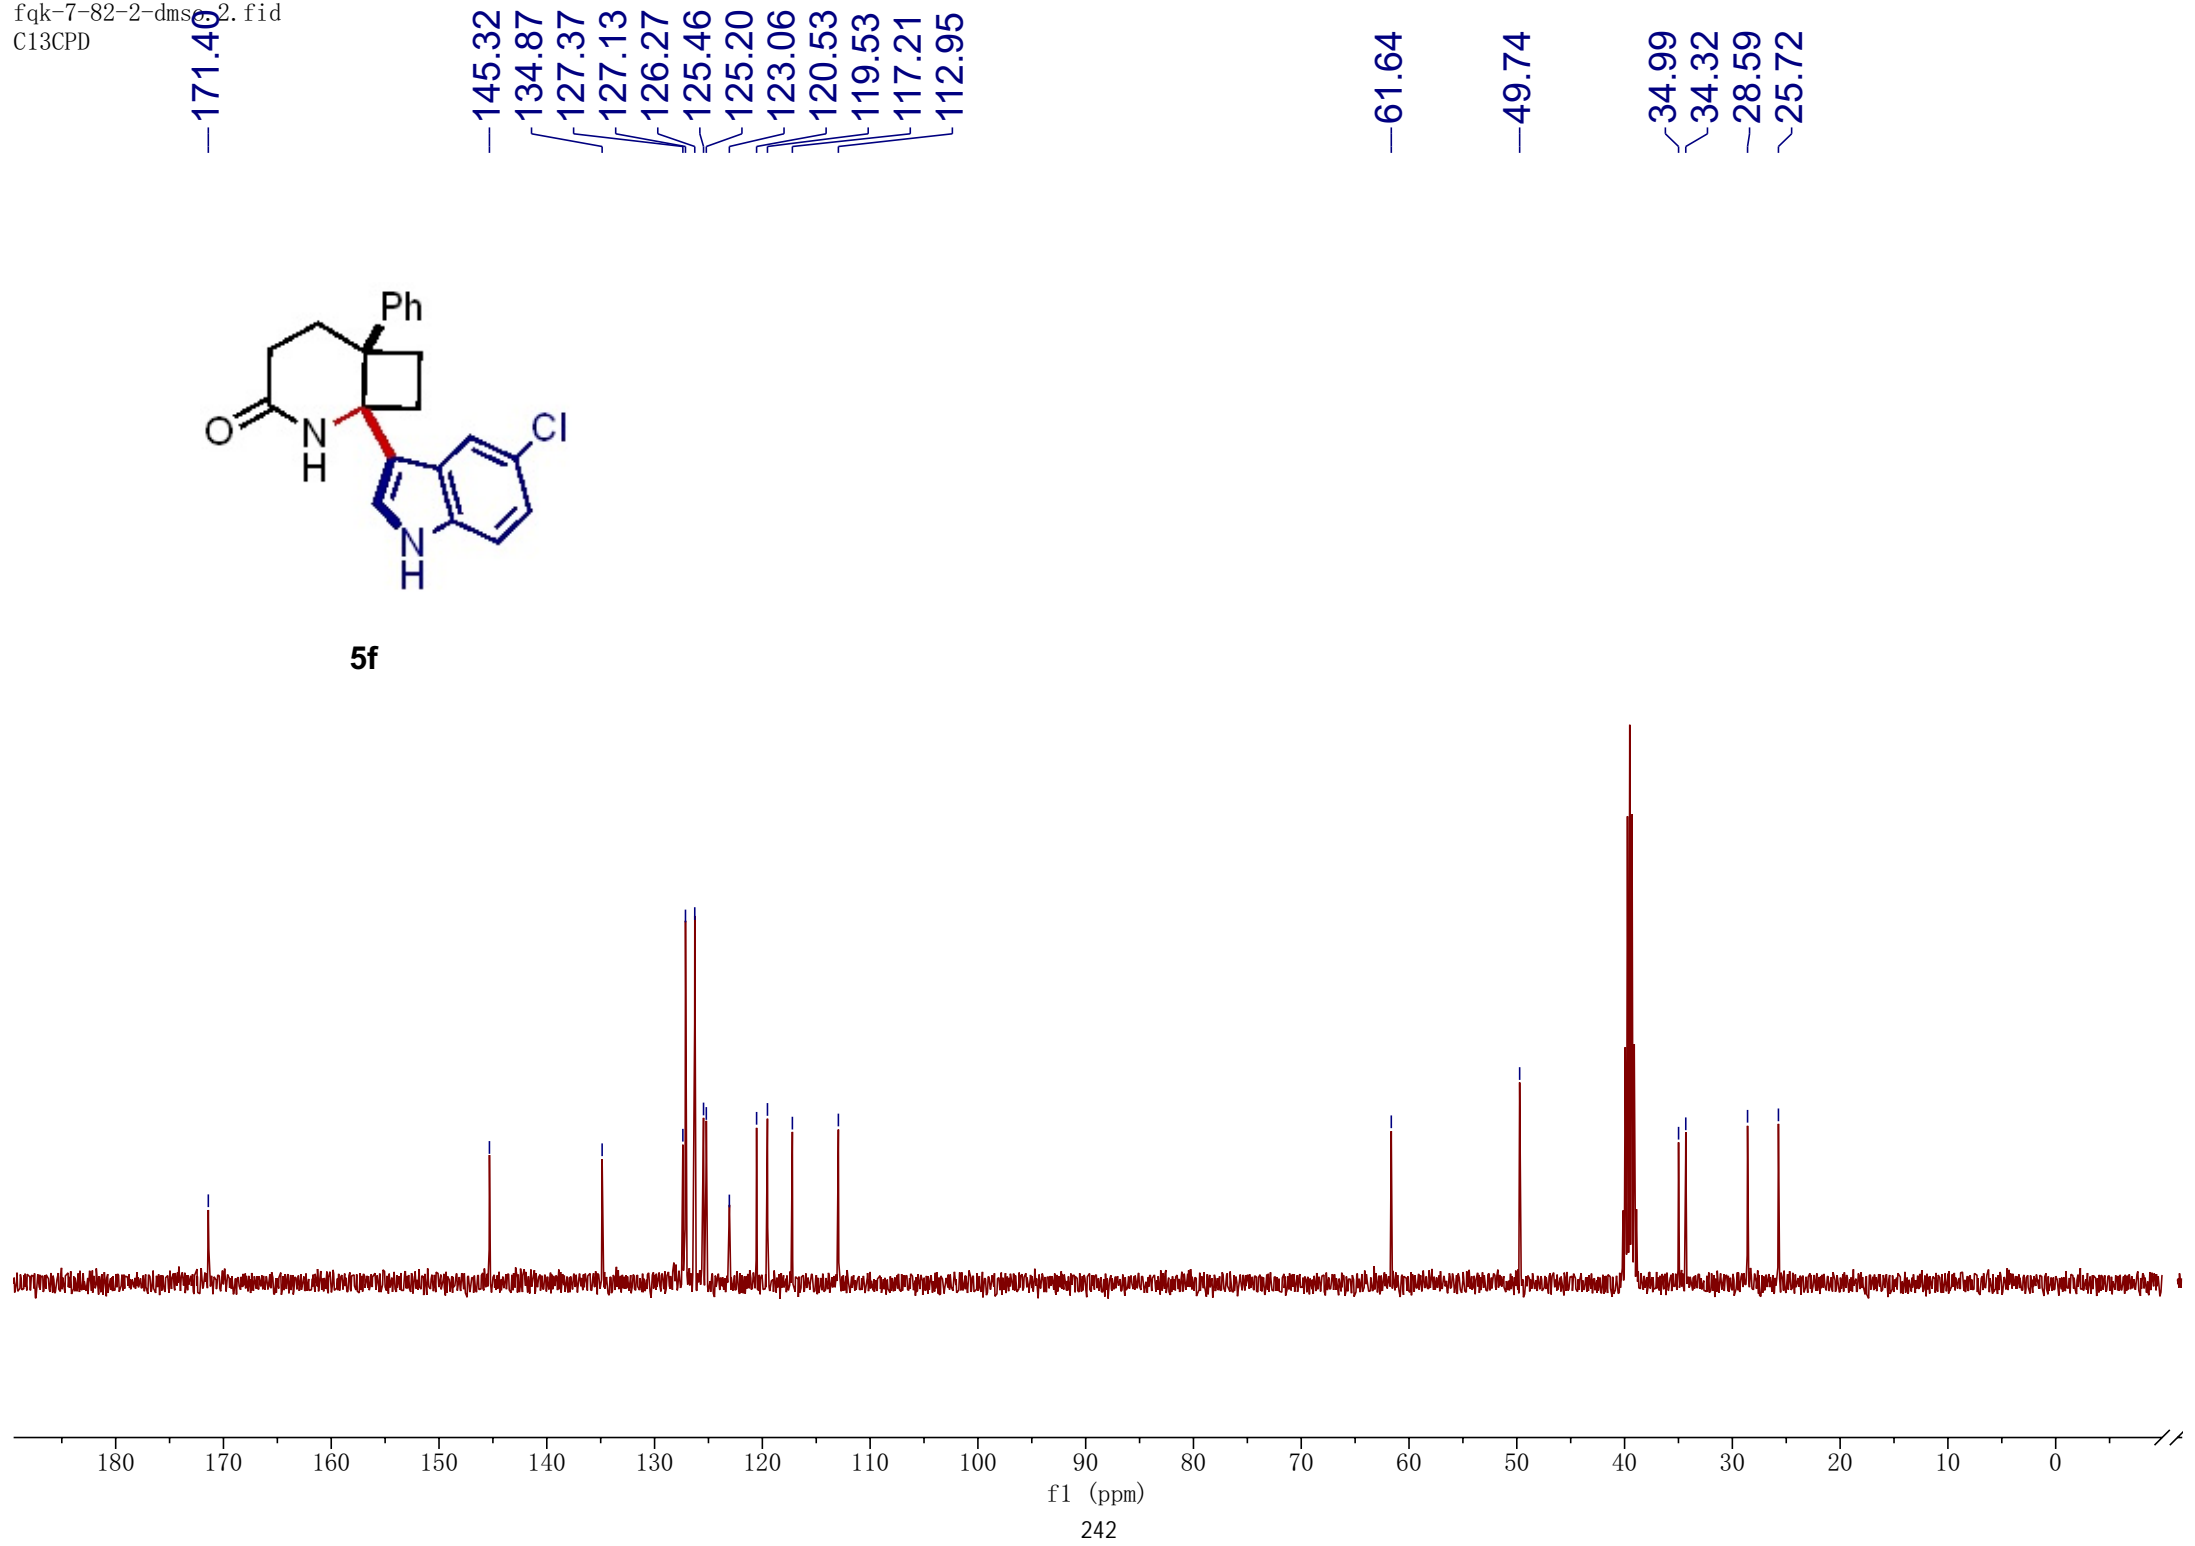

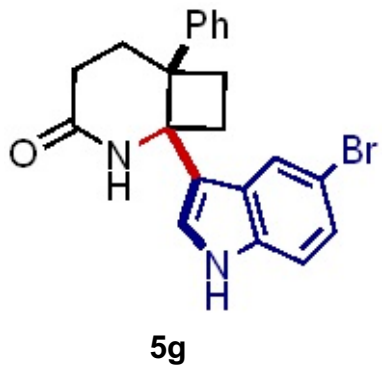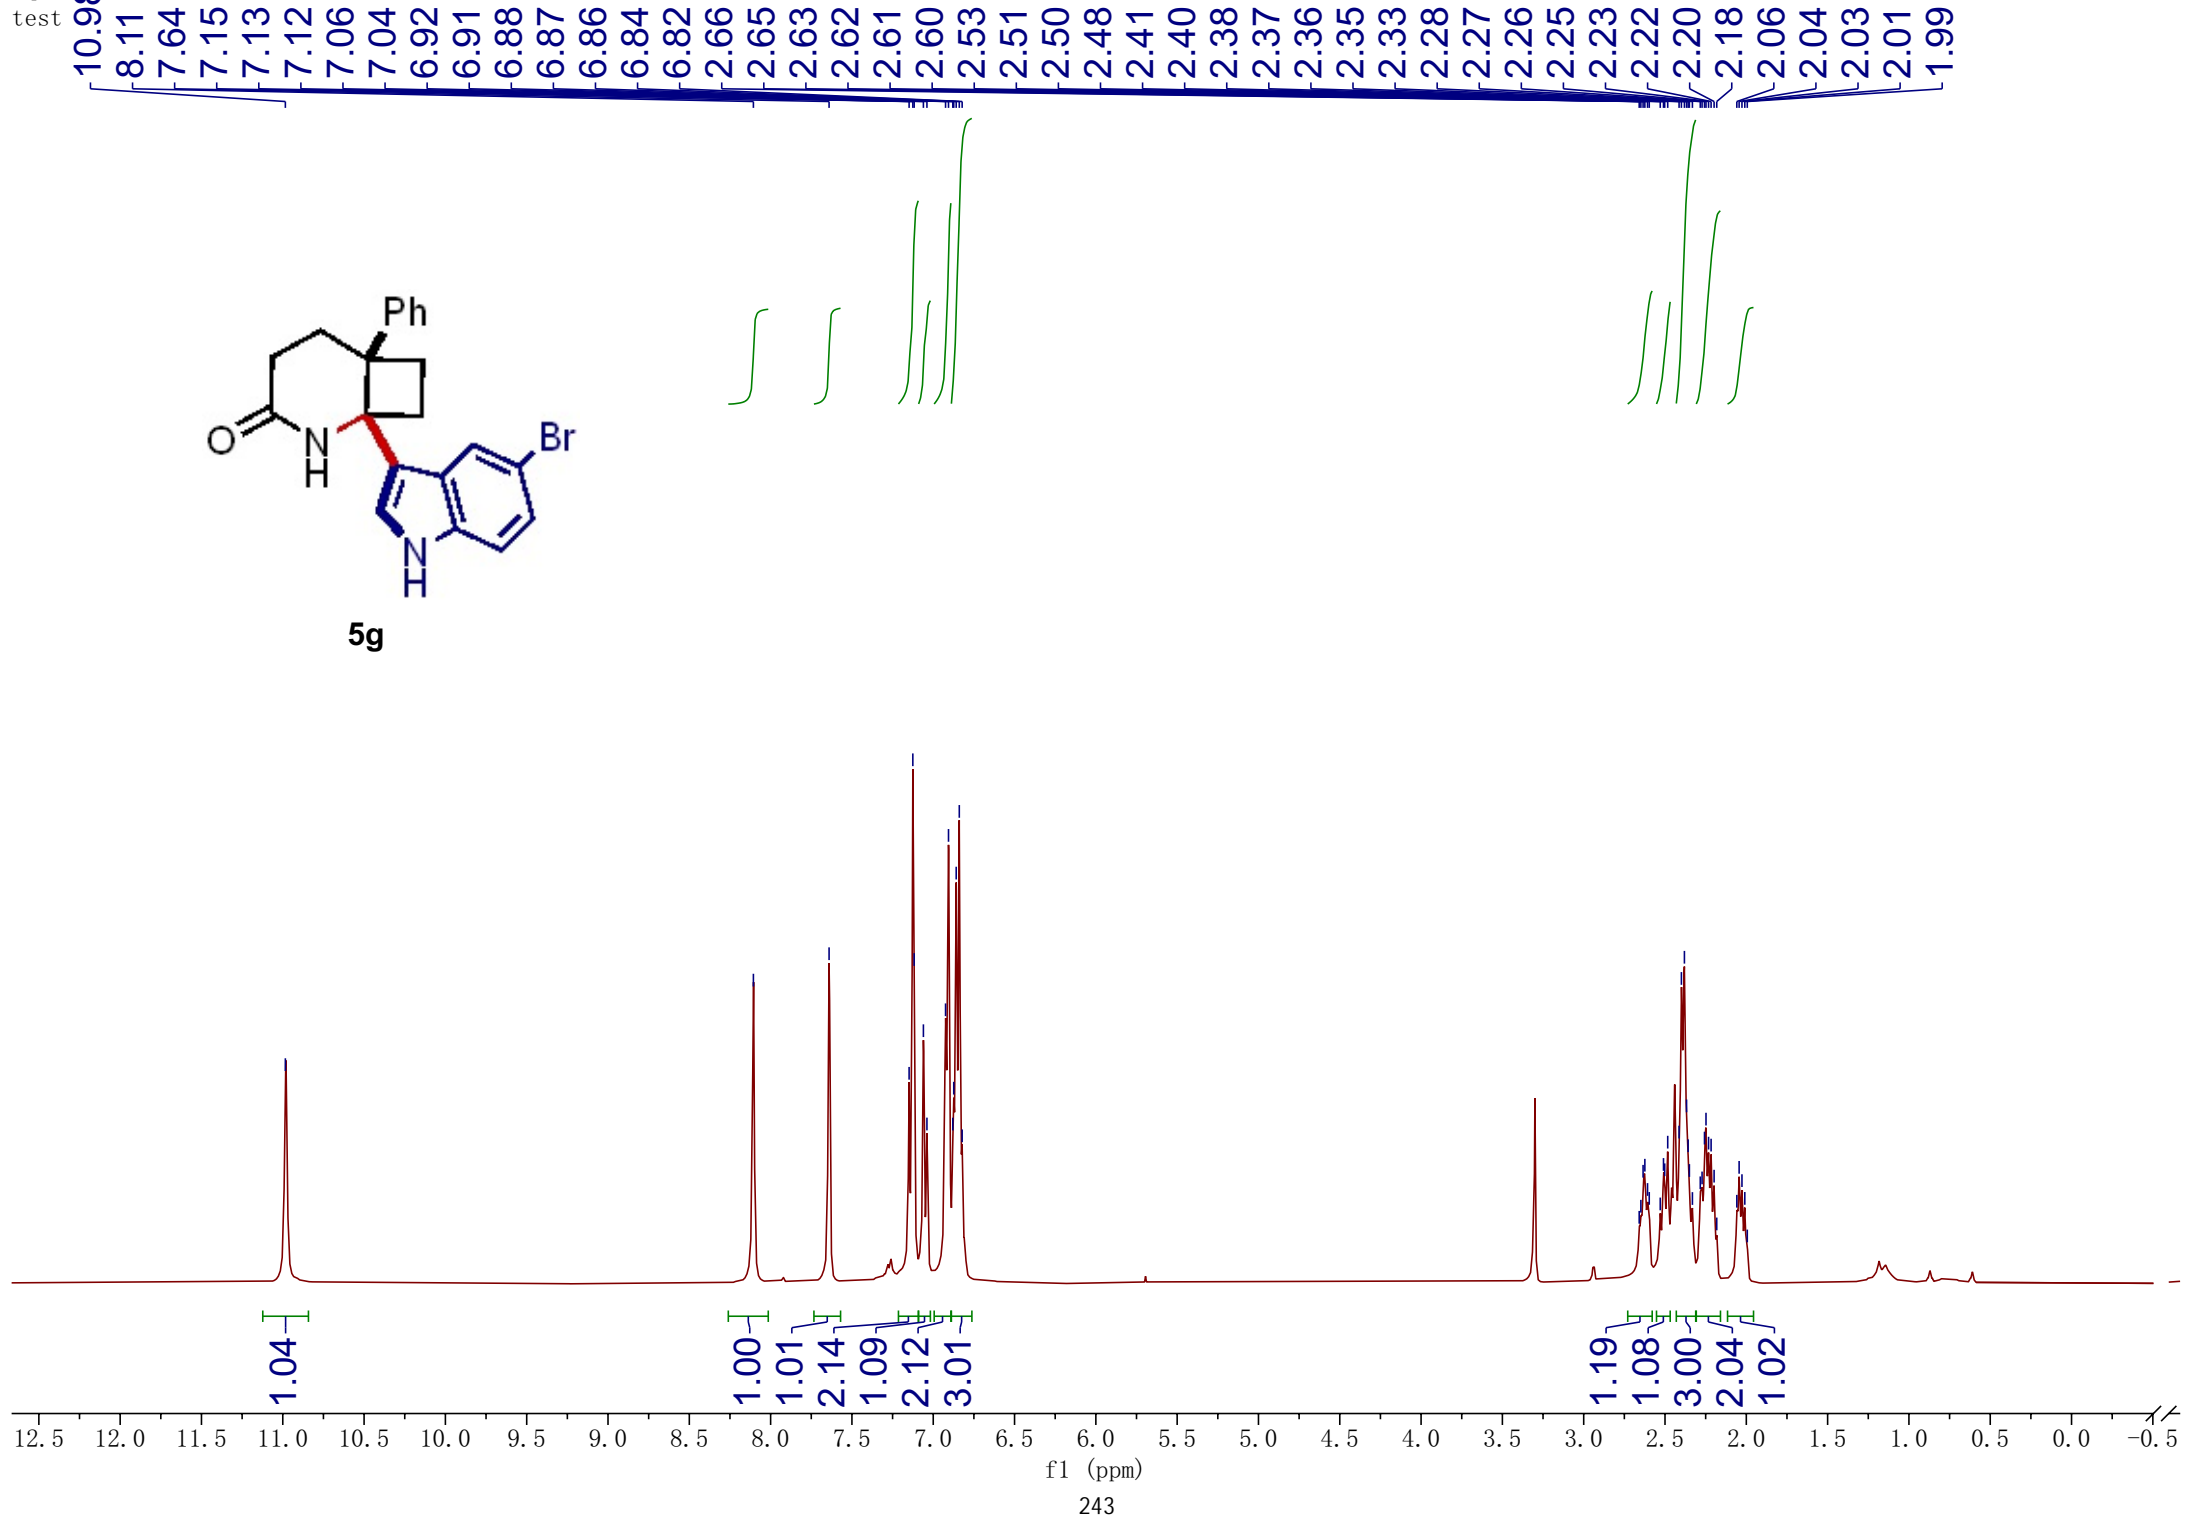

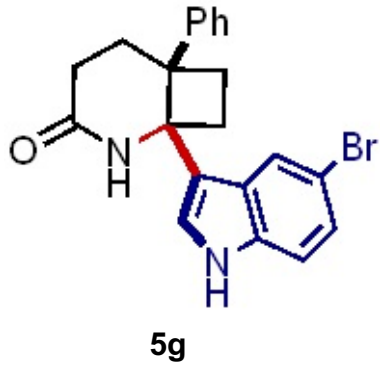

—171.30  
—145.25  
—135.04  
—128.04  
—127.08  
—126.23  
—125.42  
—125.00  
—123.01  
—122.51  
—117.11  
—113.36  
—111.12

—61.62  
—49.70  
—34.93  
—34.26  
—28.60  
—25.64

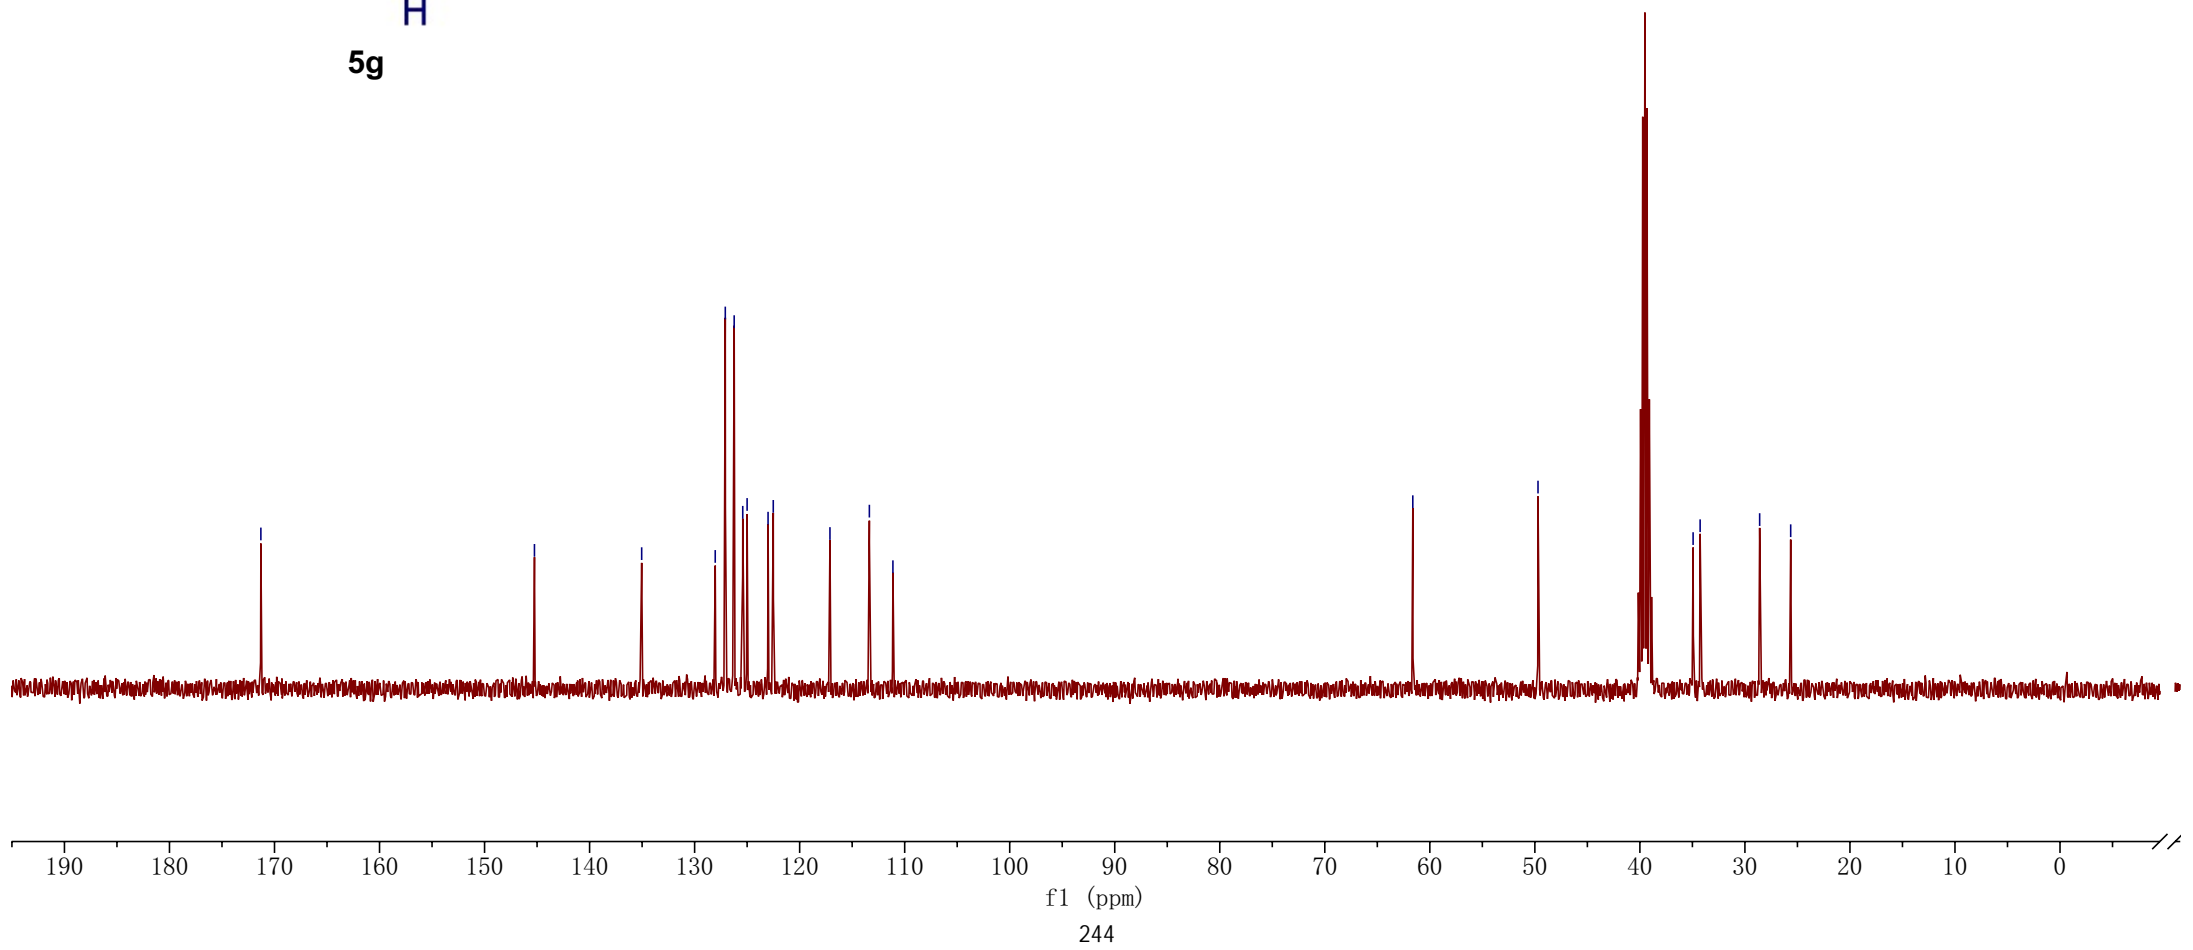

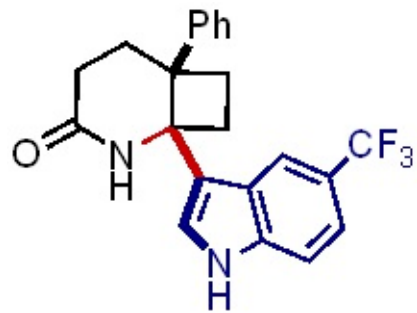

5h

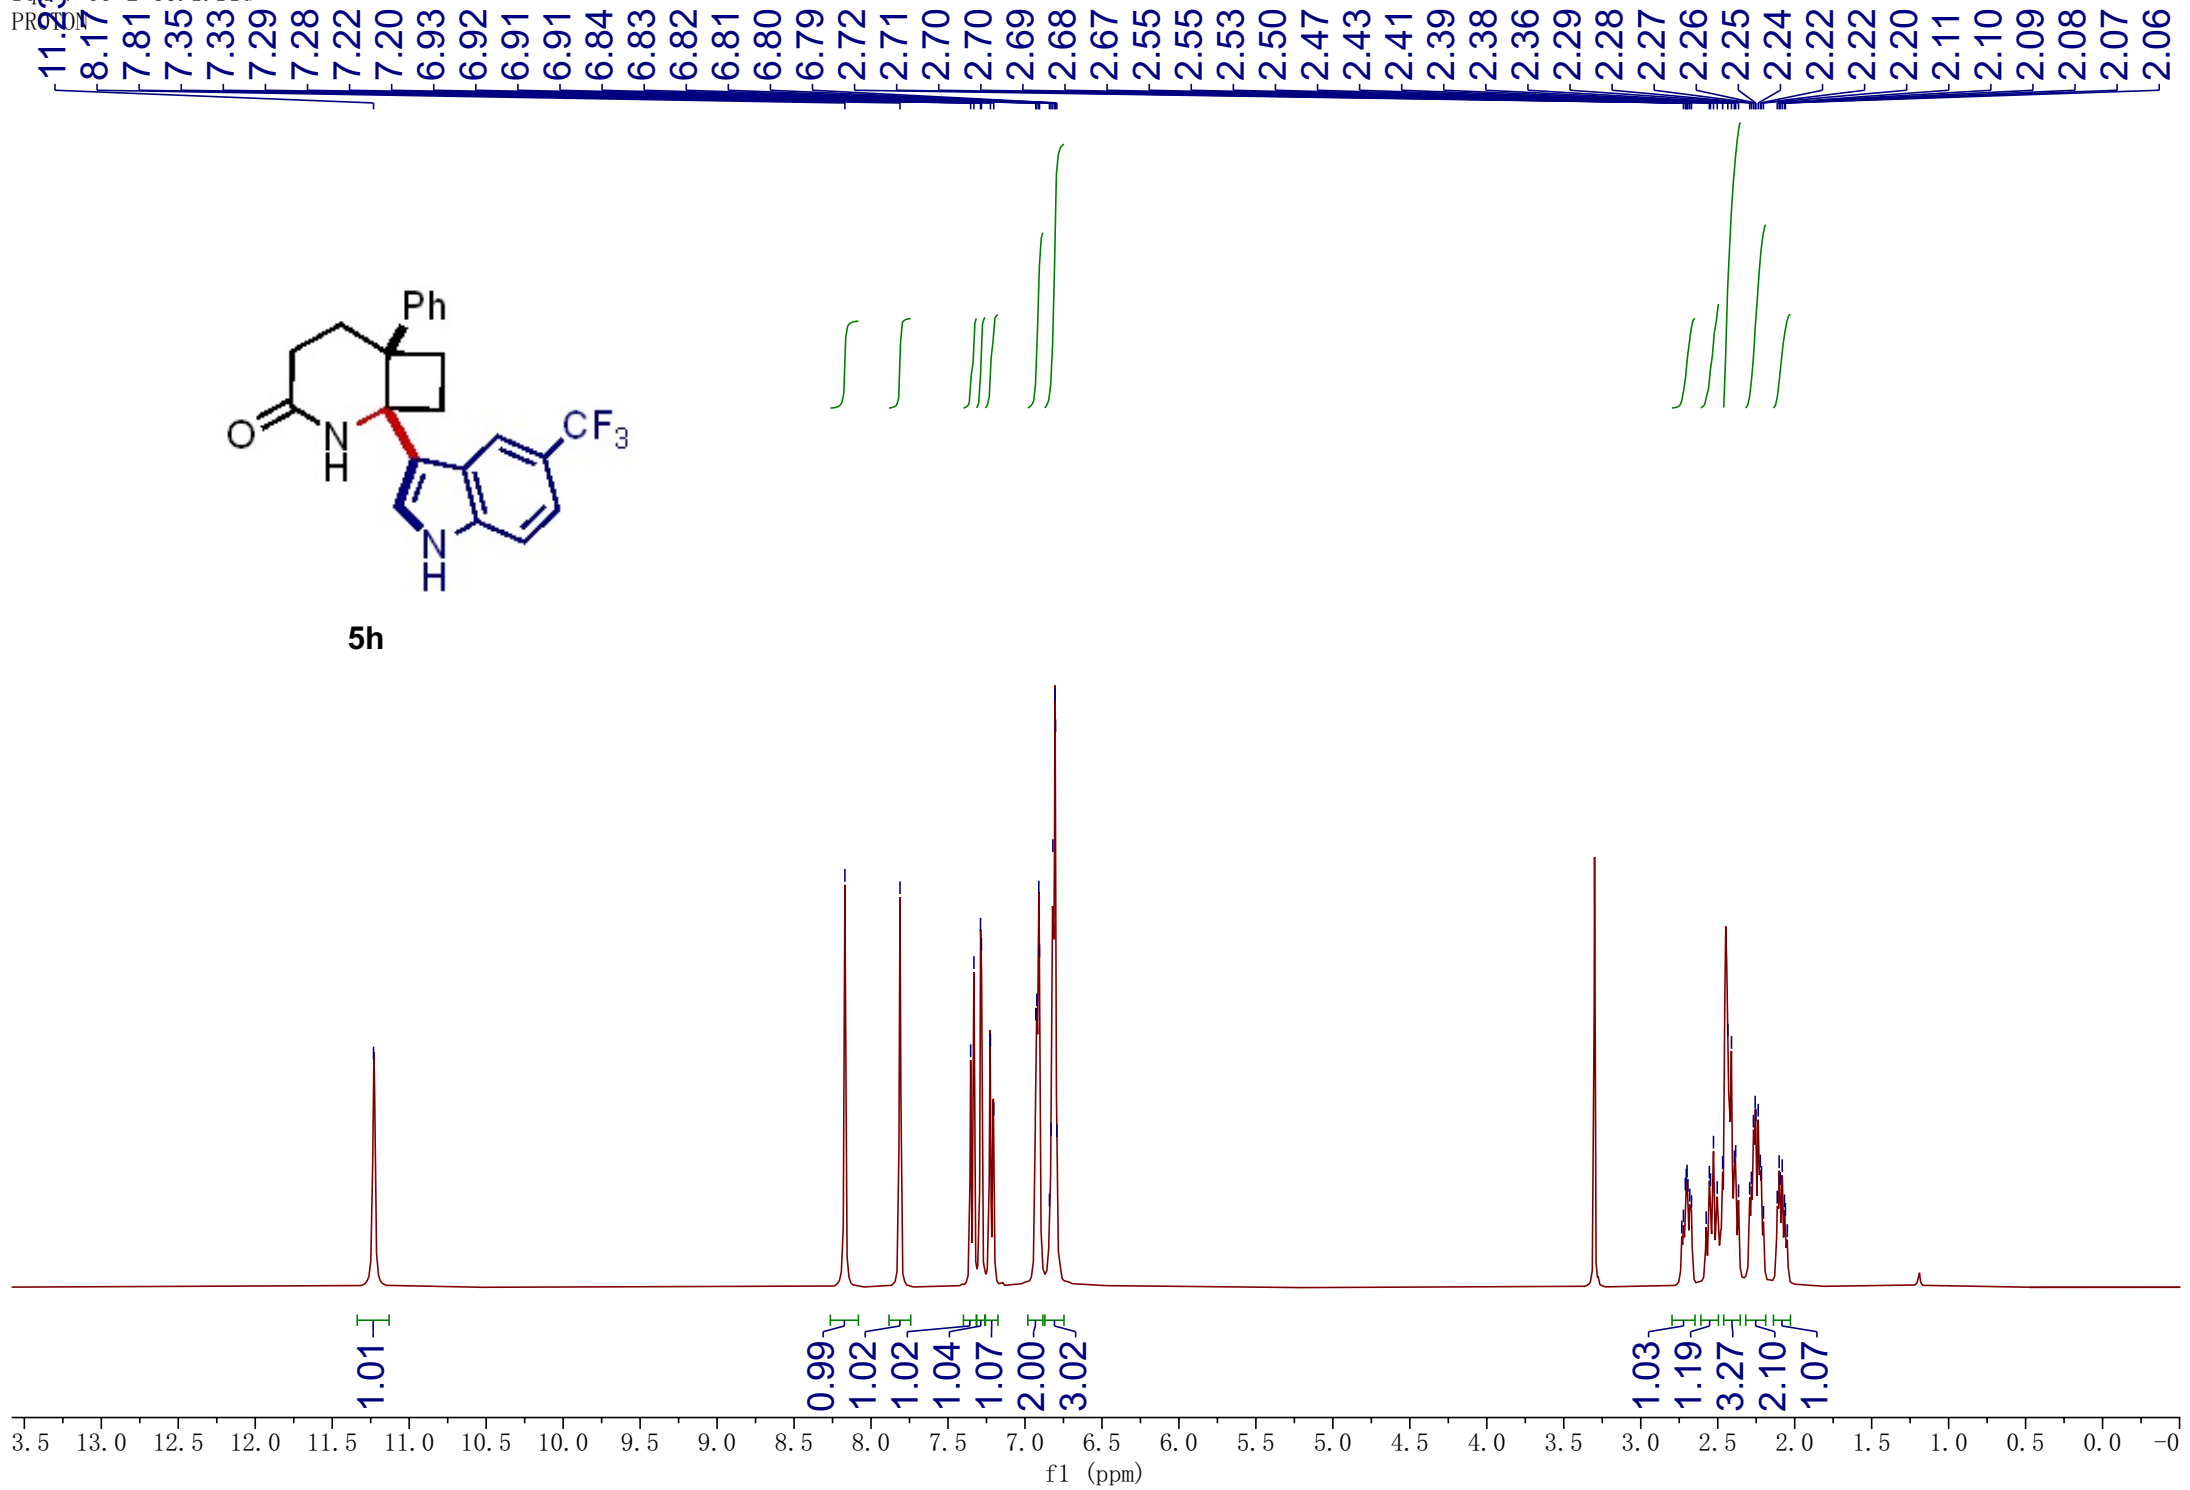

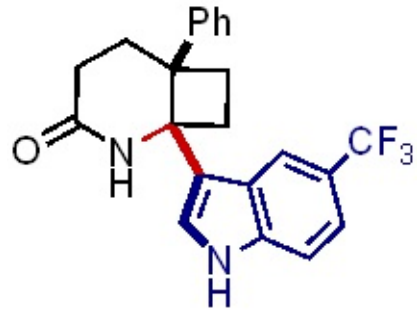

5h

—171.45  
—145.03  
—137.93  
—129.68  
126.99  
126.21  
125.69  
125.42  
124.29  
121.60  
119.53  
119.23  
118.93  
118.61  
118.36  
117.89  
117.84  
116.91  
116.87  
112.09  
—61.65  
—49.64  
34.81  
34.08  
28.75  
25.59

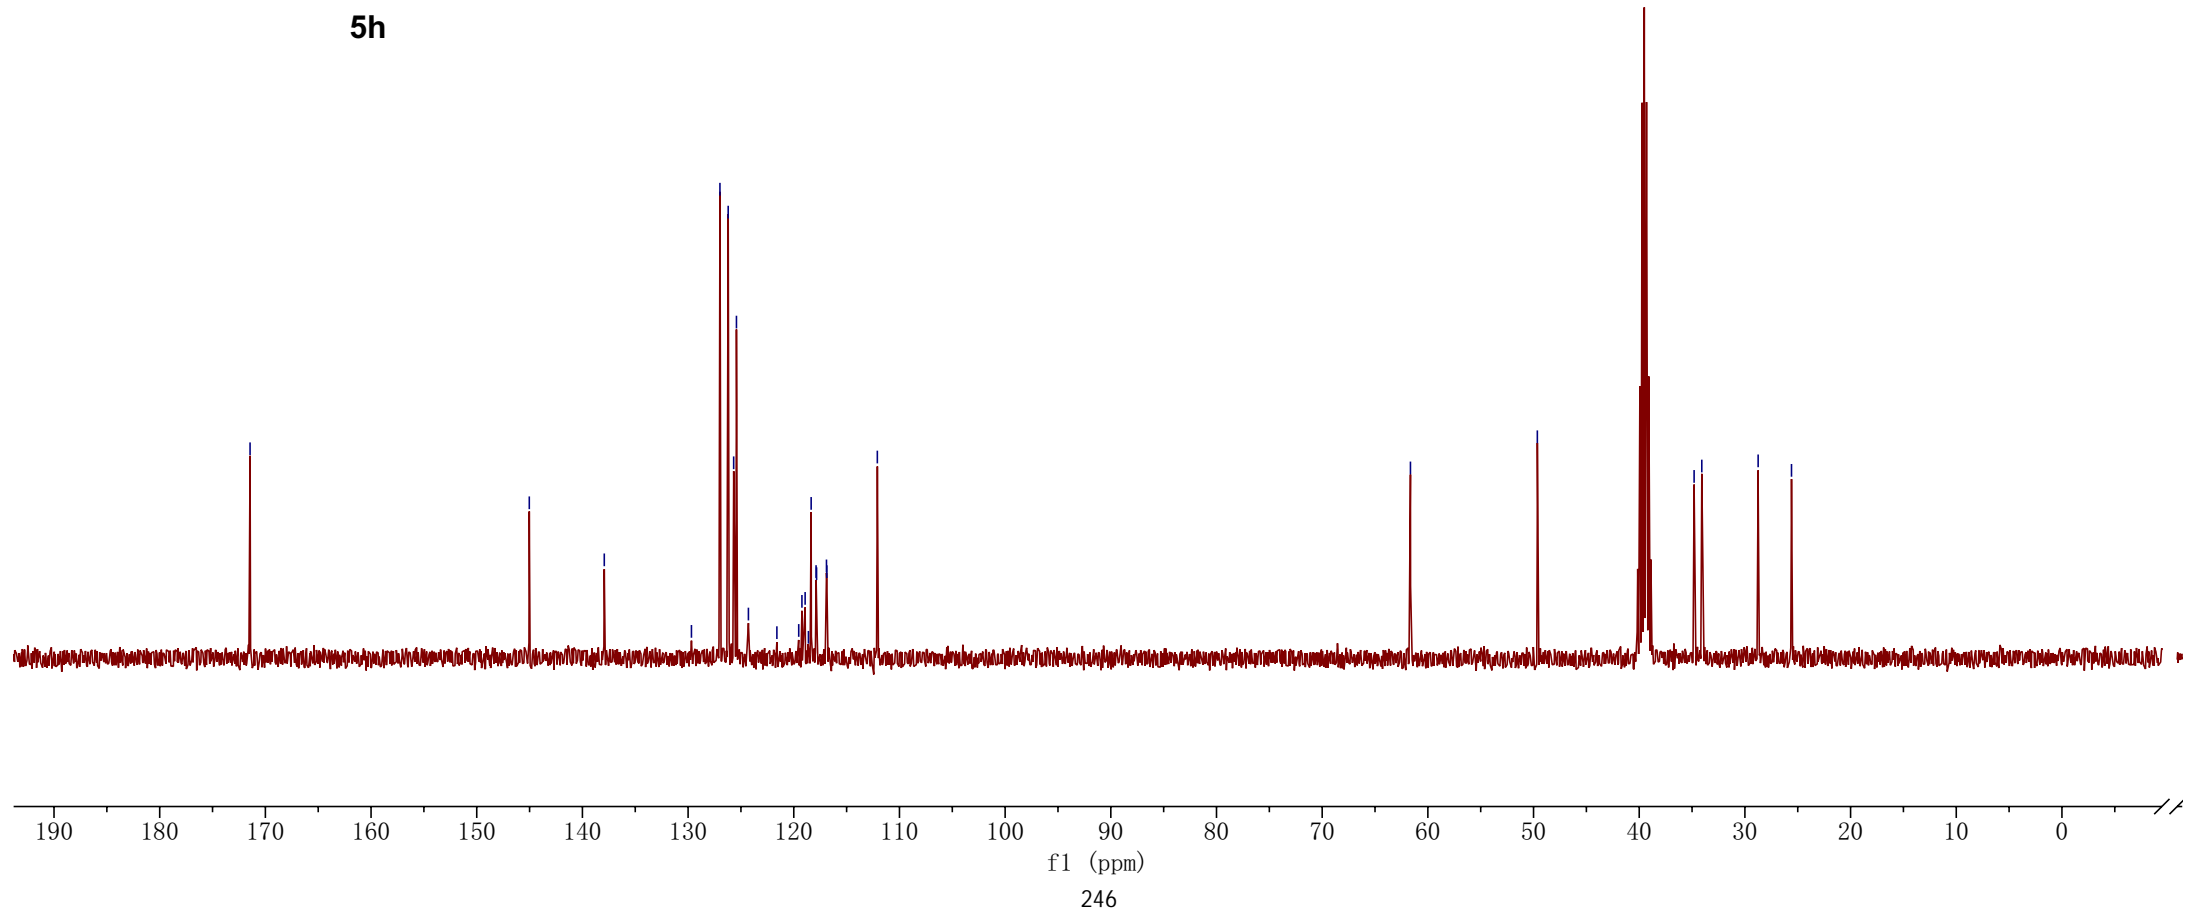

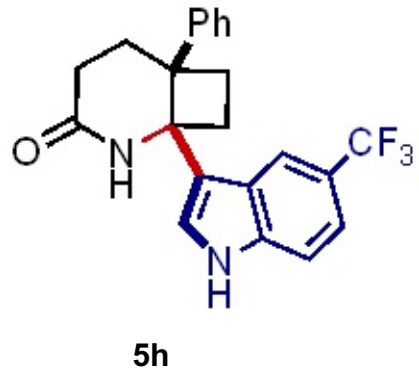

---58.38

100

50

0

-50

-100  
f1 (ppm)

-150

-200

-250

-300

247

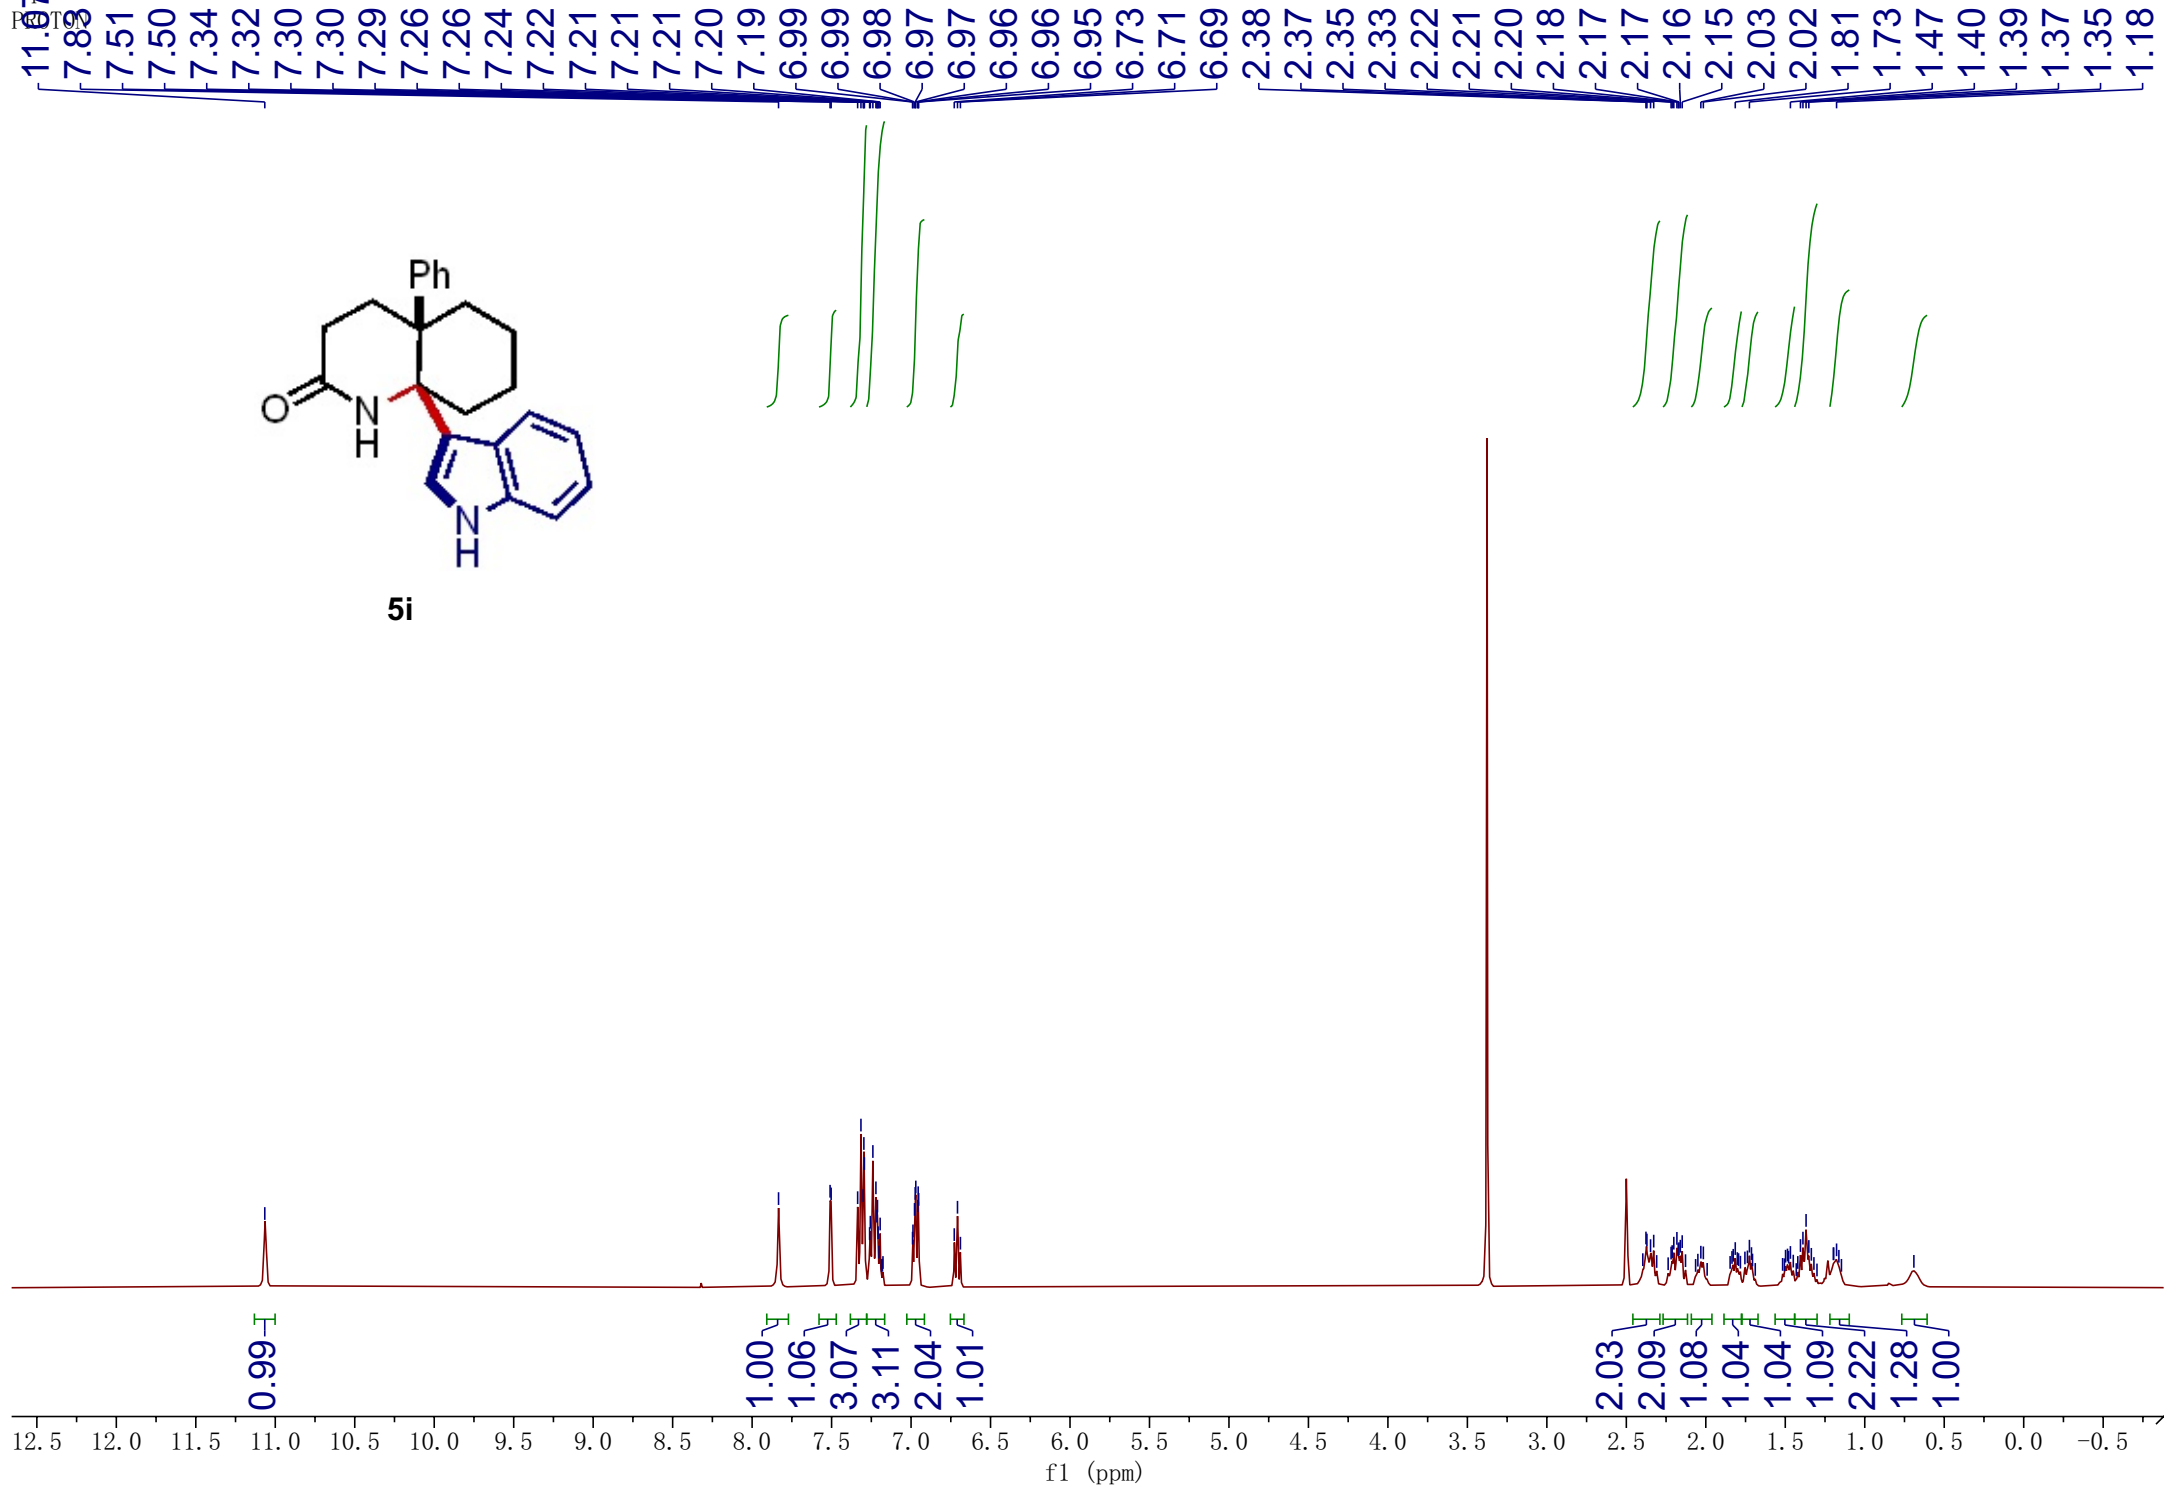

—171.40

143.41  
136.32  
128.38  
127.20  
126.61  
125.88  
123.52  
120.97  
120.88  
118.37  
118.04  
111.39

—67.36

—48.77

34.60  
34.03  
31.16  
28.37  
25.23  
24.61

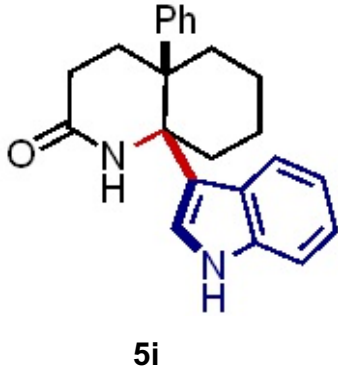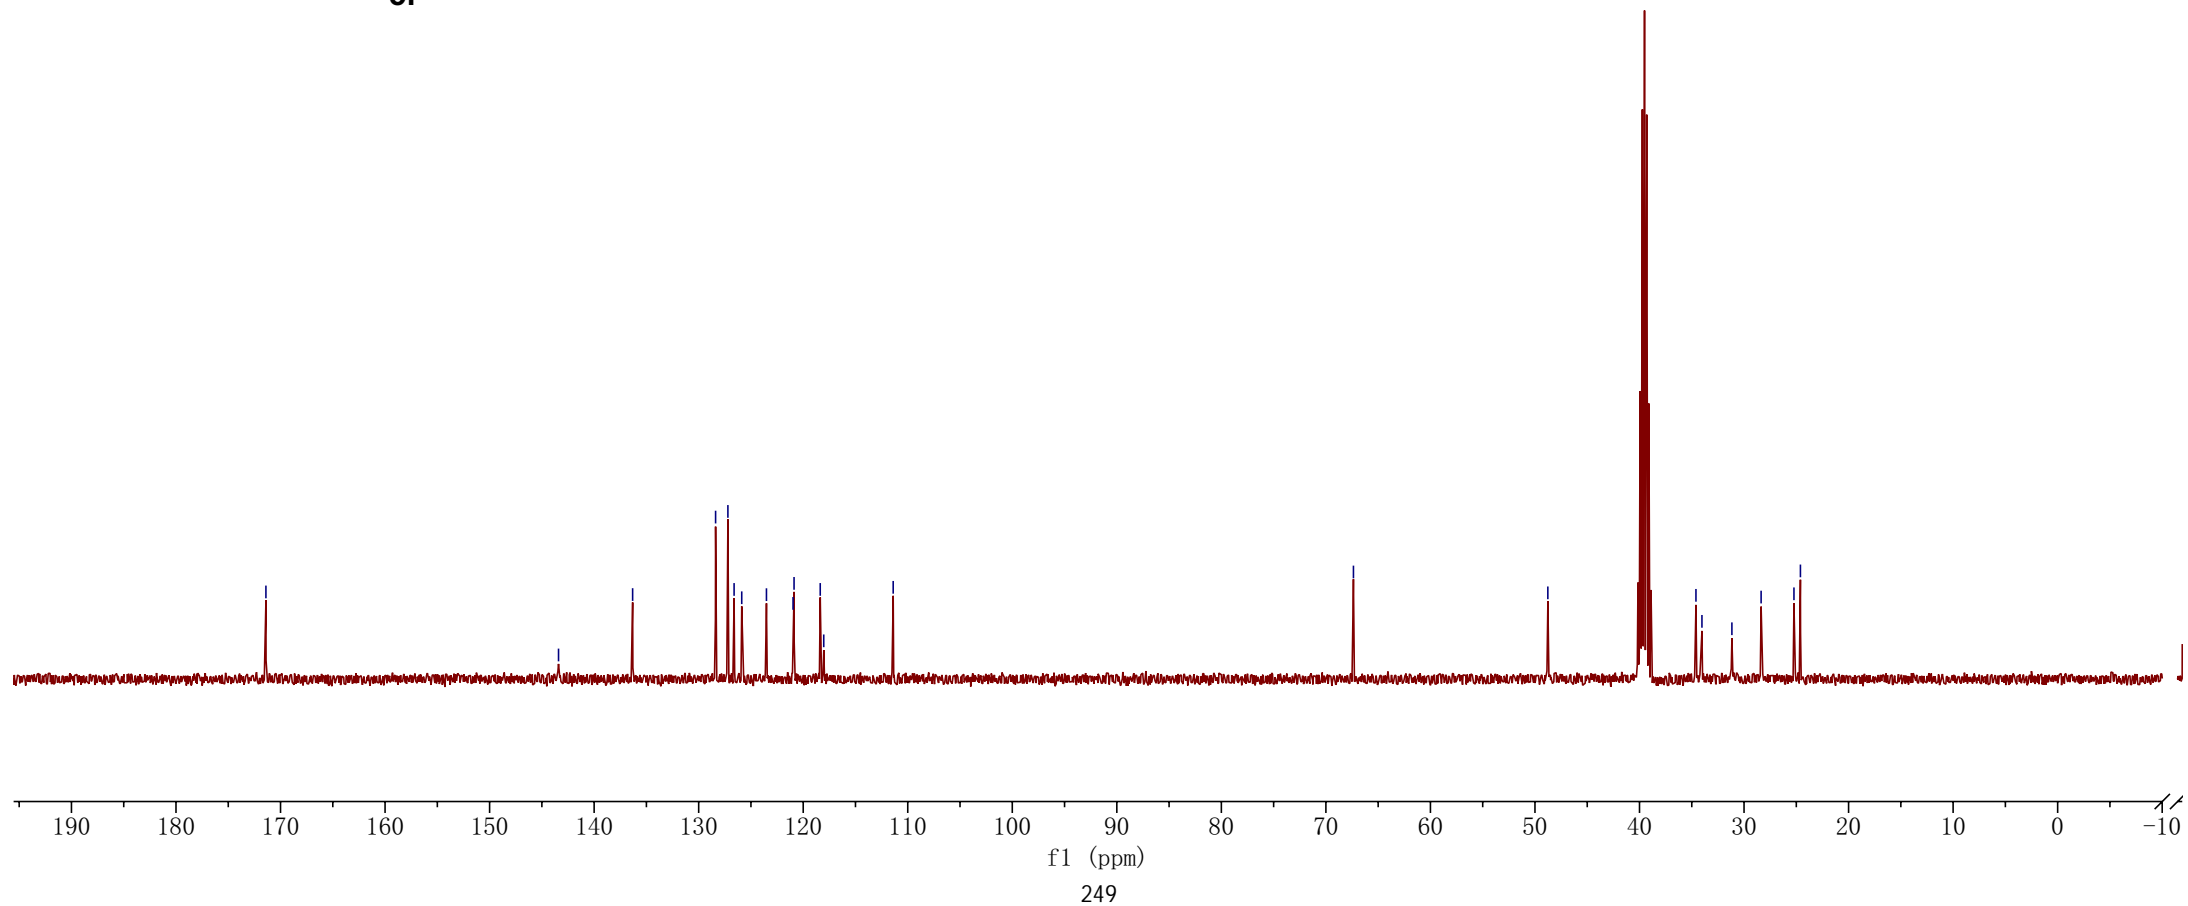

10.91  
7.94  
7.47  
7.47  
7.33  
7.32  
7.27  
7.26  
7.25  
7.23  
7.23  
7.22  
7.21  
7.20  
6.65  
6.64  
6.62  
6.62  
6.33  
6.33  
3.44  
2.37  
2.36  
2.34  
2.32  
2.23  
2.22  
2.21  
2.19  
2.18  
2.17  
2.16  
2.02  
2.01  
1.79  
1.78  
1.77  
1.76  
1.75  
1.73  
1.72  
1.49  
1.47  
1.41  
1.39  
1.37  
1.35  
1.34  
1.21  
1.18  
1.17

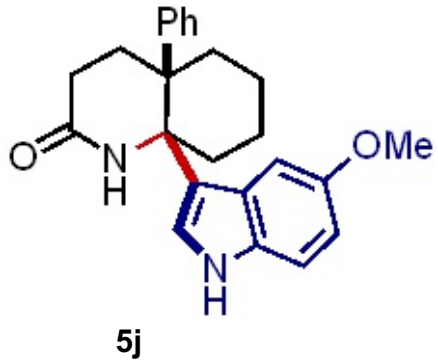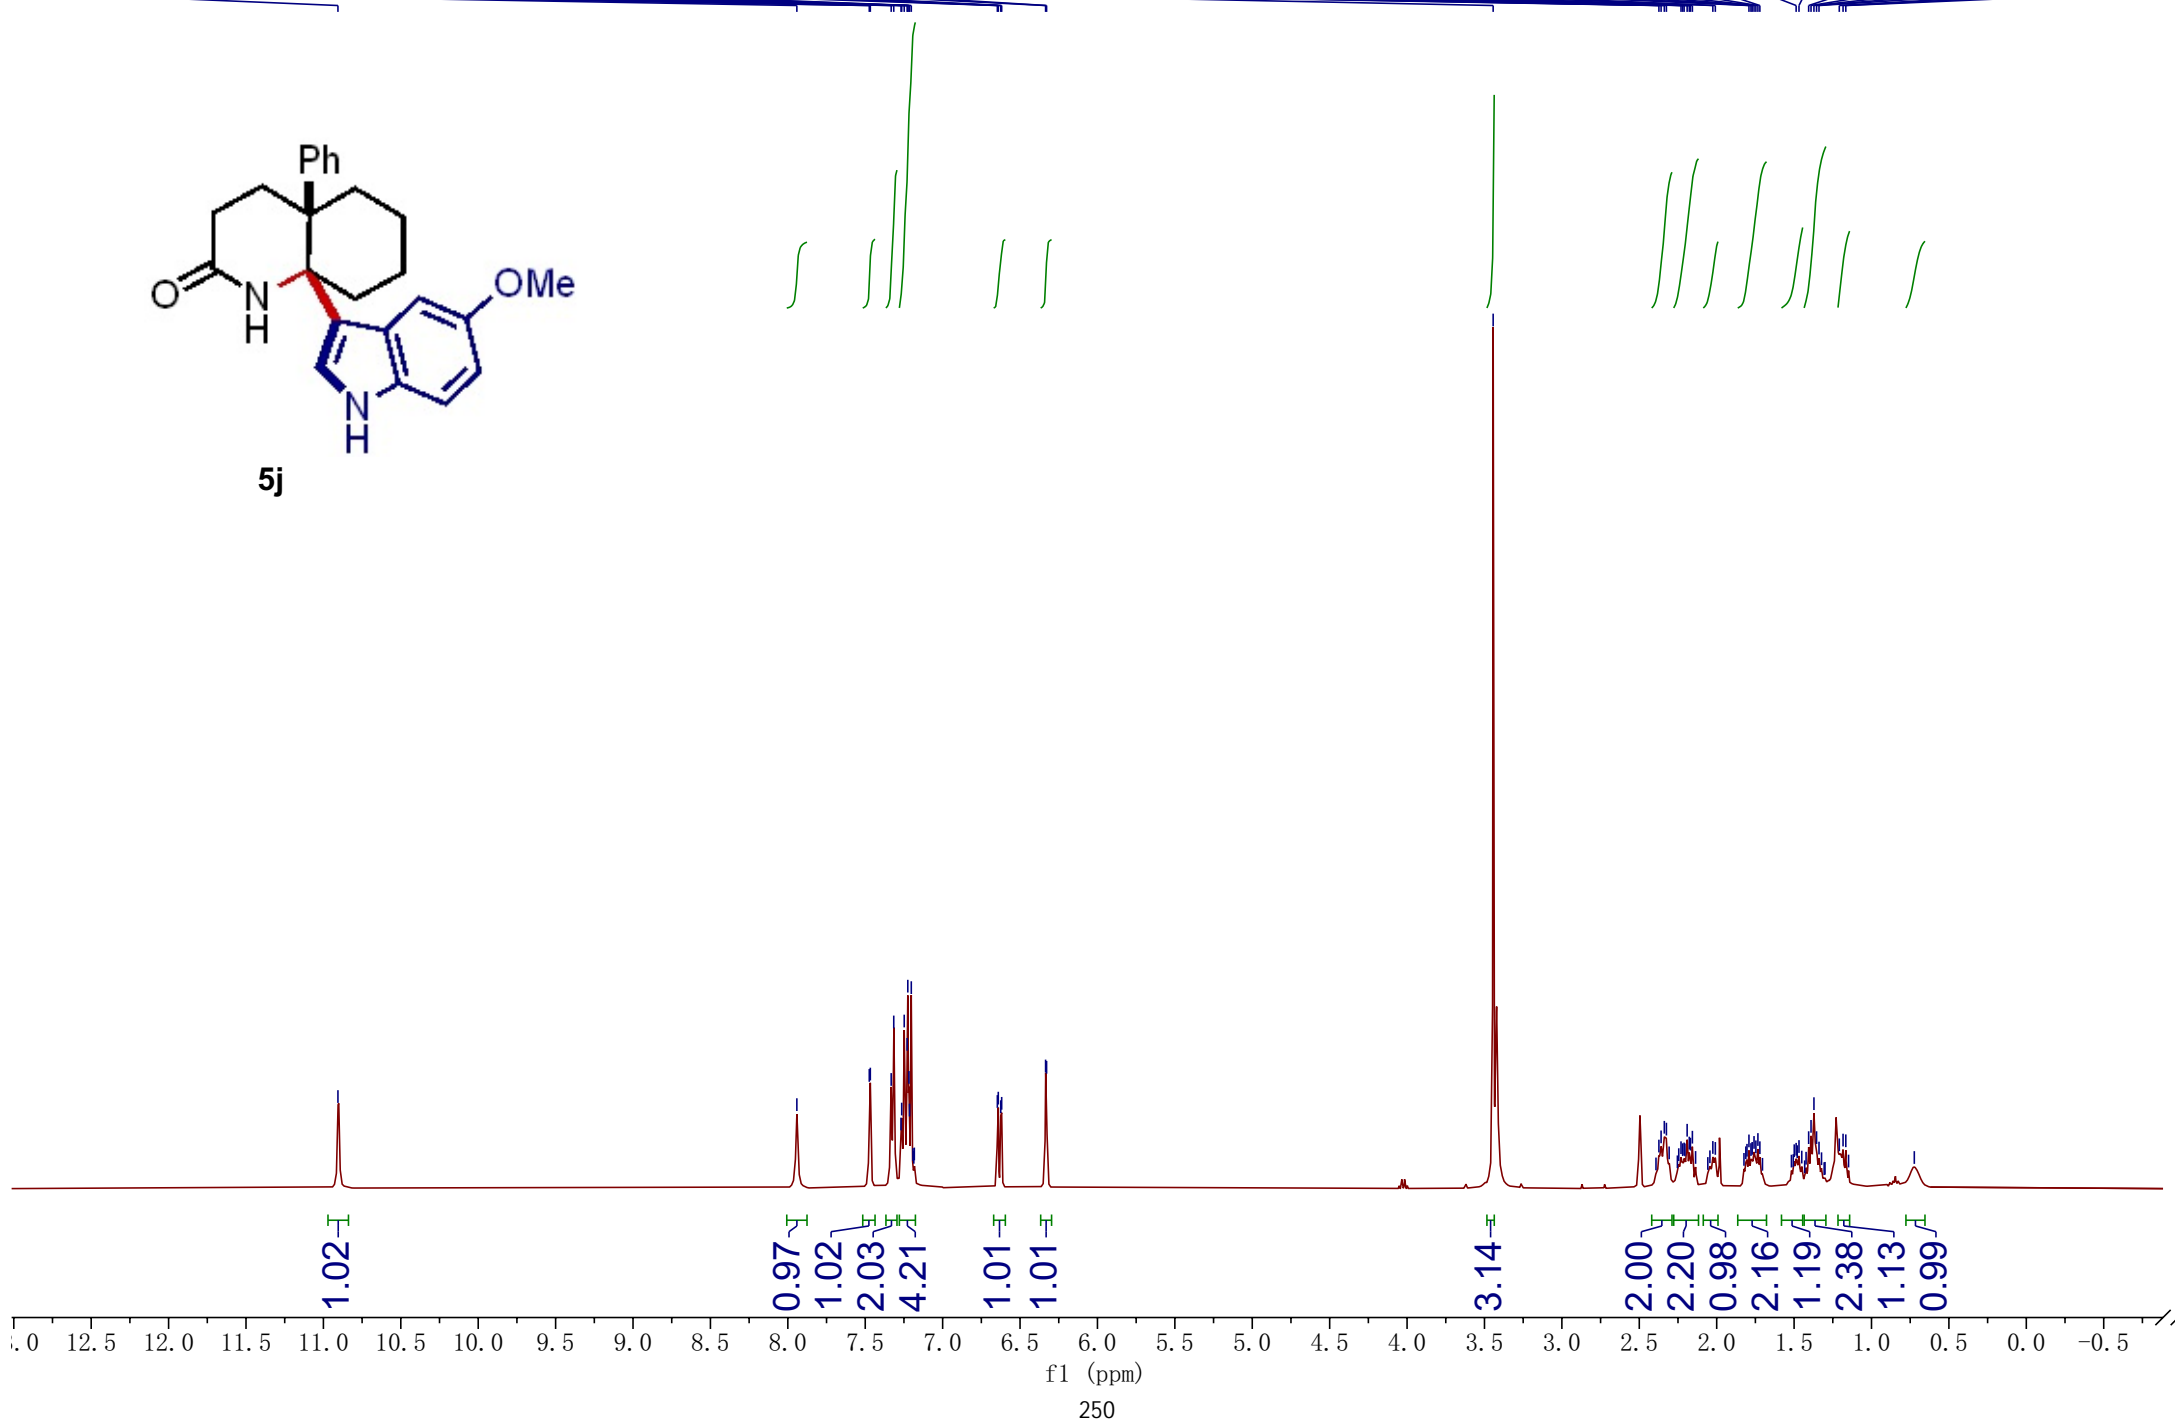

f1 (ppm)

250

8YCK-1-86.2.fid  
1D 13C with decoupling

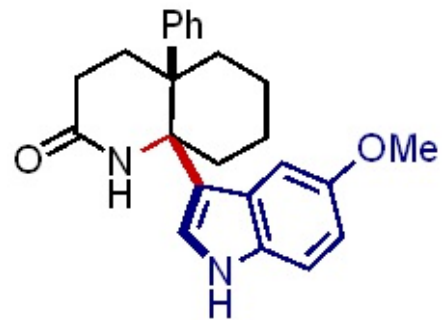

5j

171.46  
152.51  
143.52  
131.52  
128.50  
127.18  
126.52  
126.34  
124.17  
117.68  
111.80  
110.51  
103.54

67.29

55.14

48.77

34.67

34.08

31.14

28.38

25.18

24.68

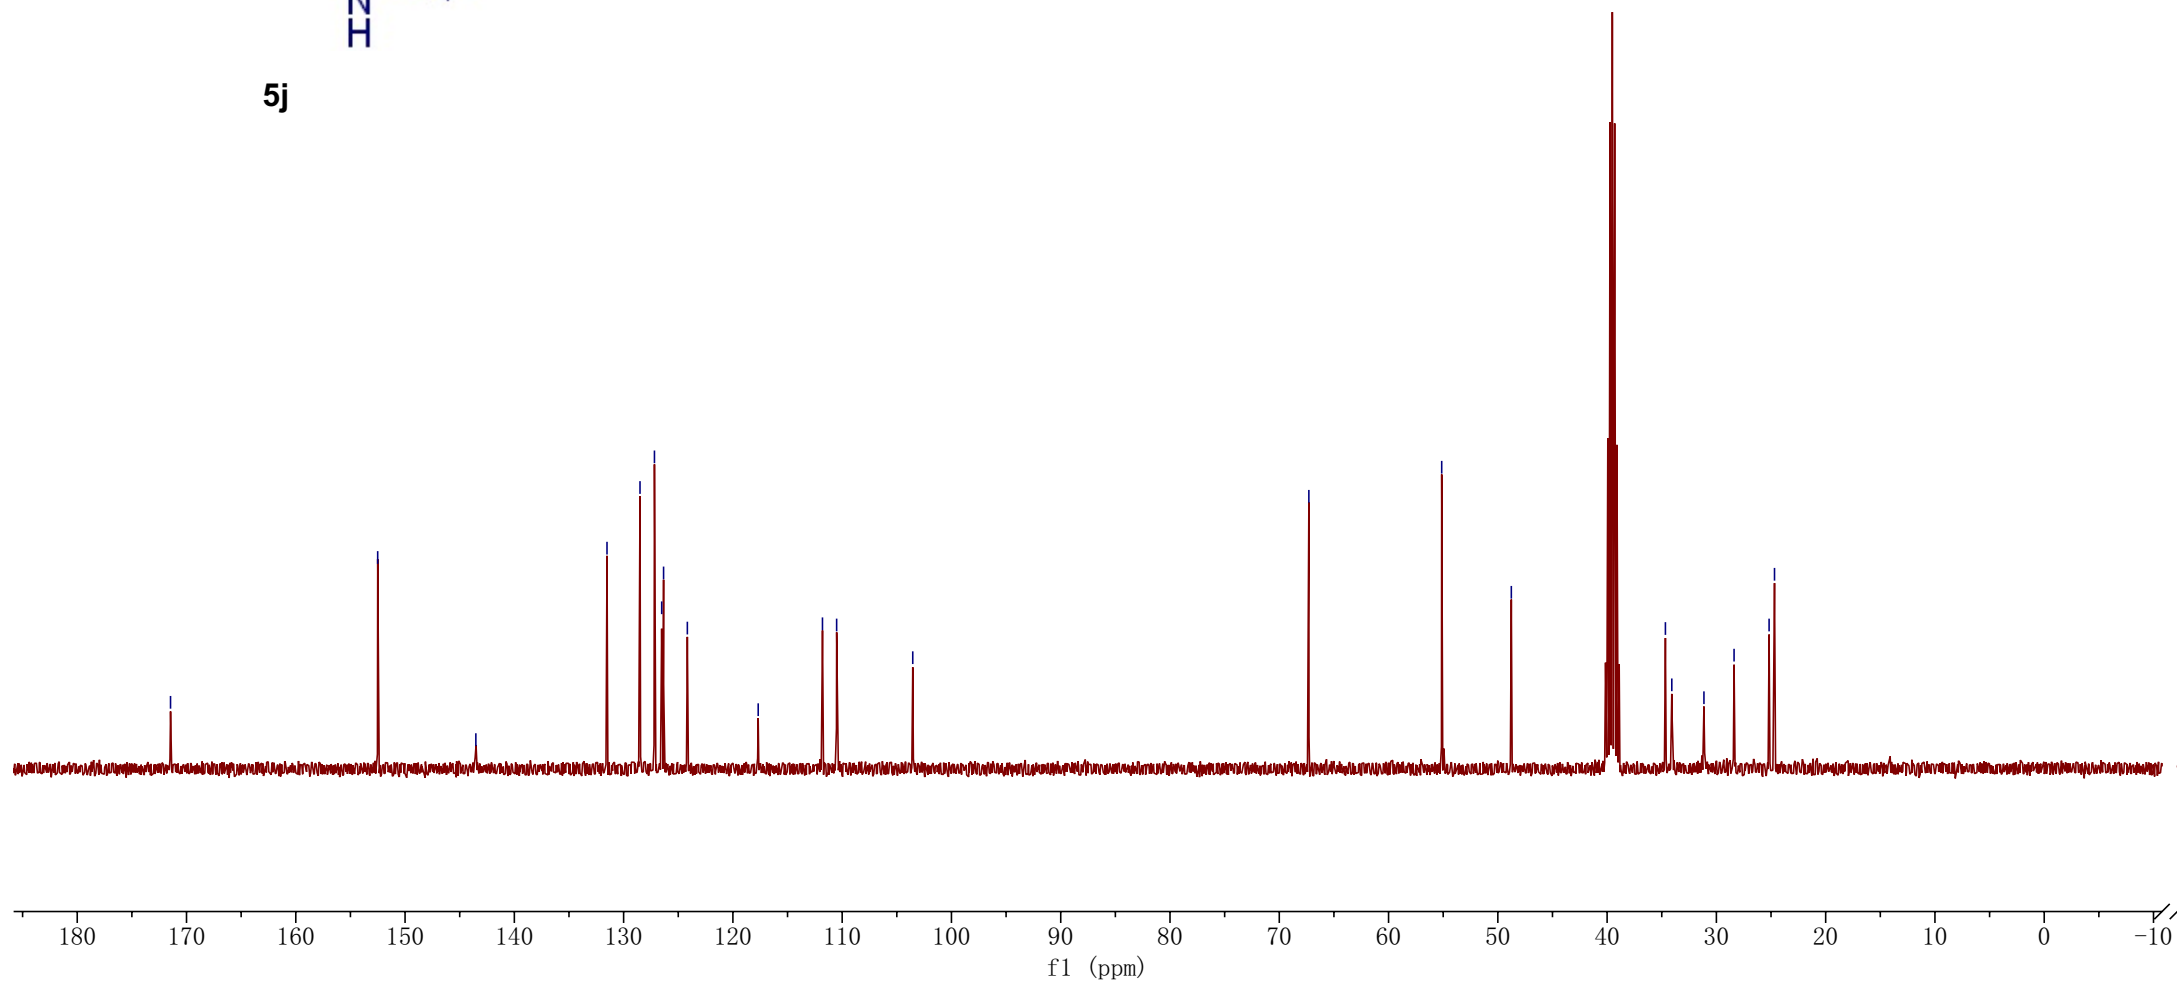

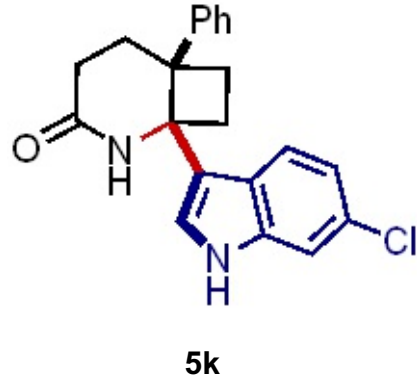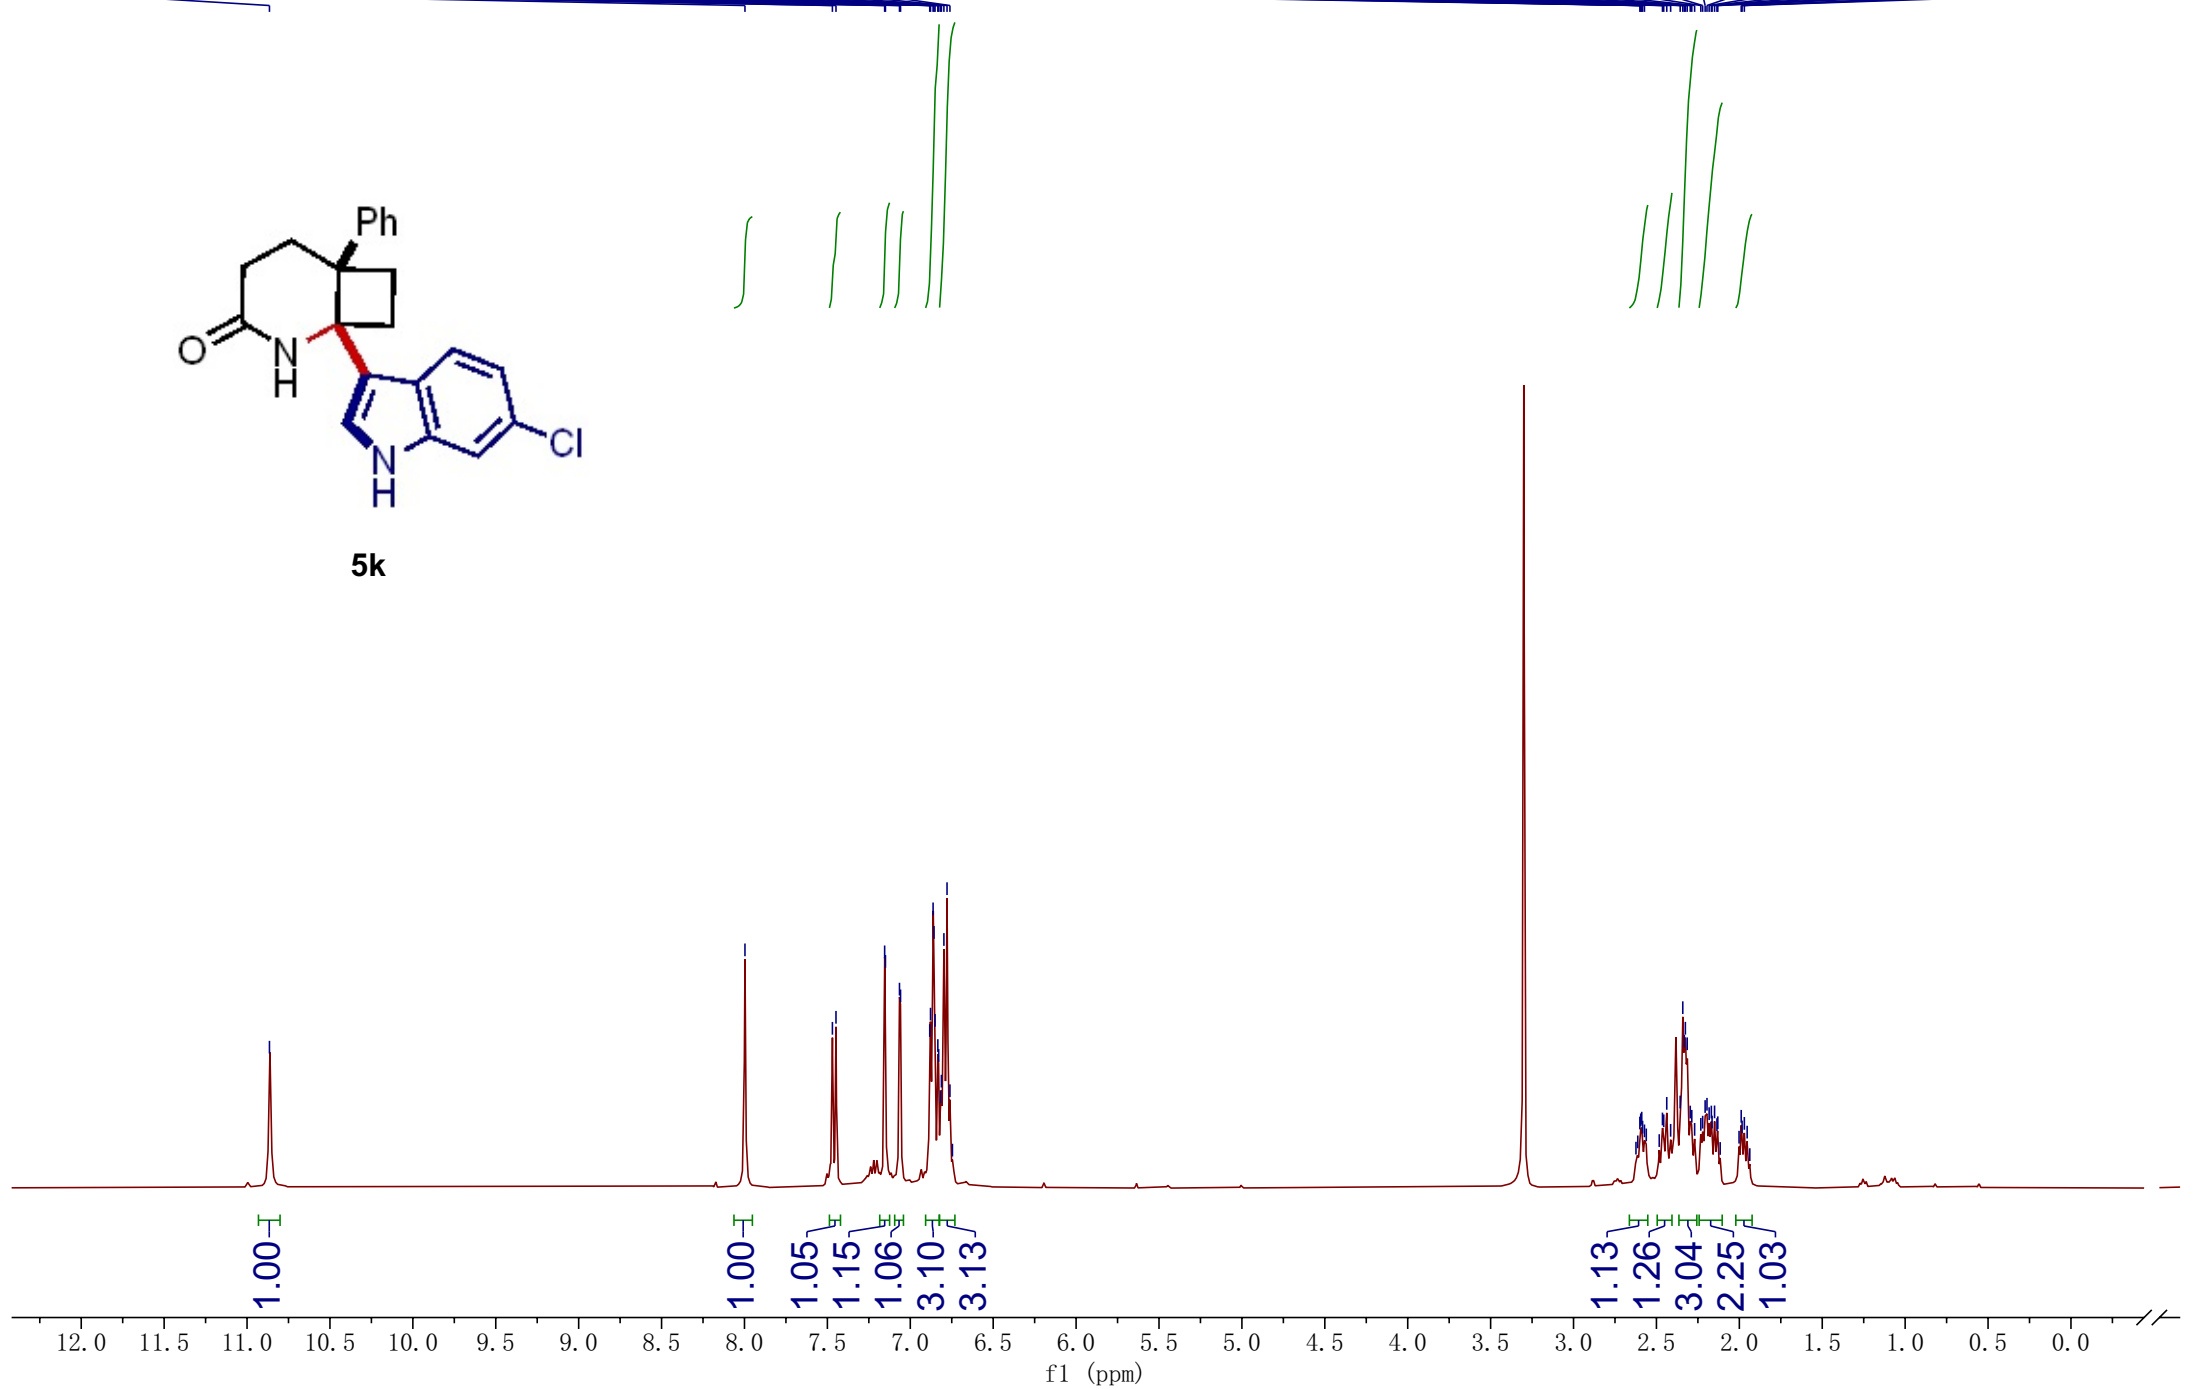

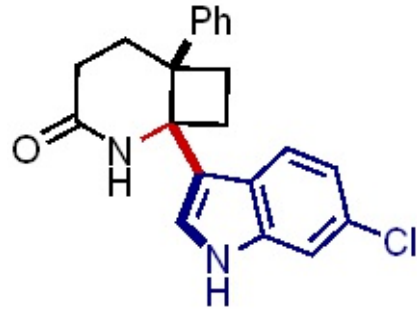

5k

—171.32  
—145.31  
—136.85  
127.14  
126.27  
125.44  
125.32  
125.09  
124.55  
121.72  
118.73  
117.61  
111.01

—61.68

—49.66

34.79  
34.30  
28.60  
25.63

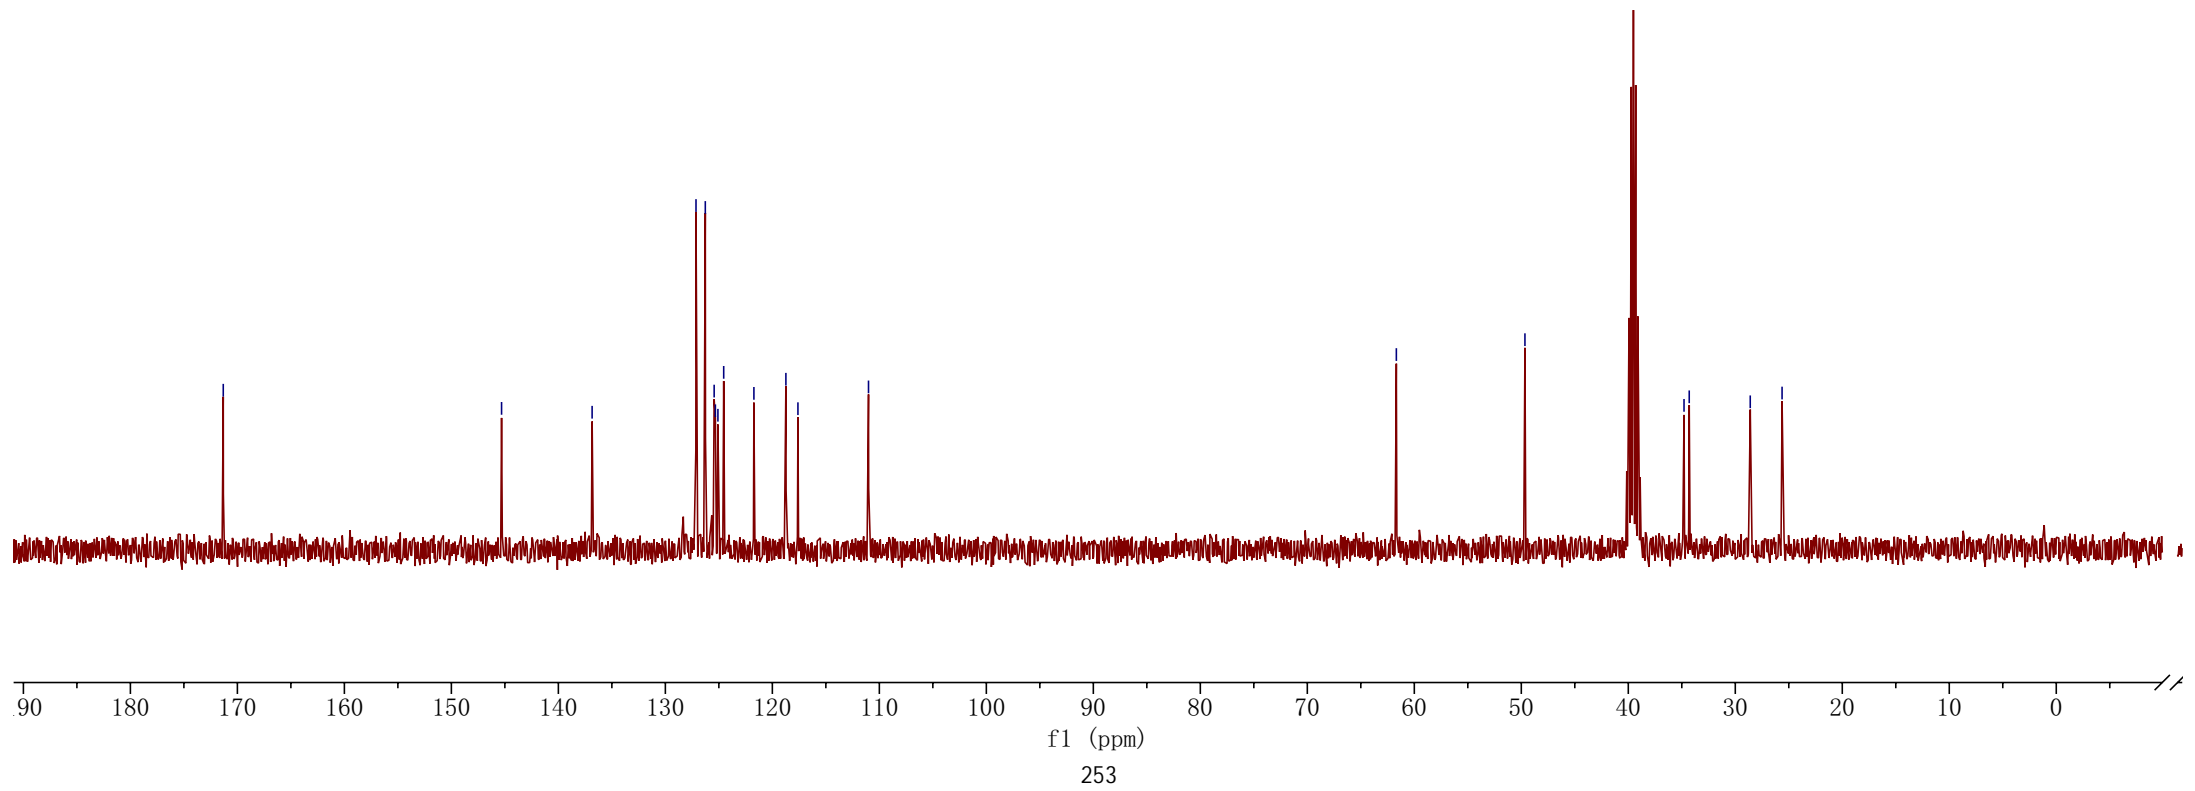

fqk-7-129-2.1.fid  
1110-DY  
0

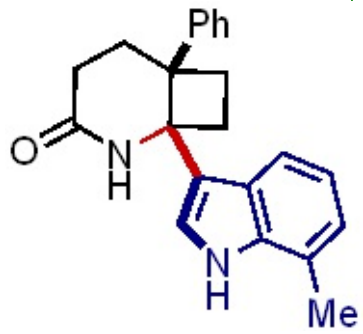

51

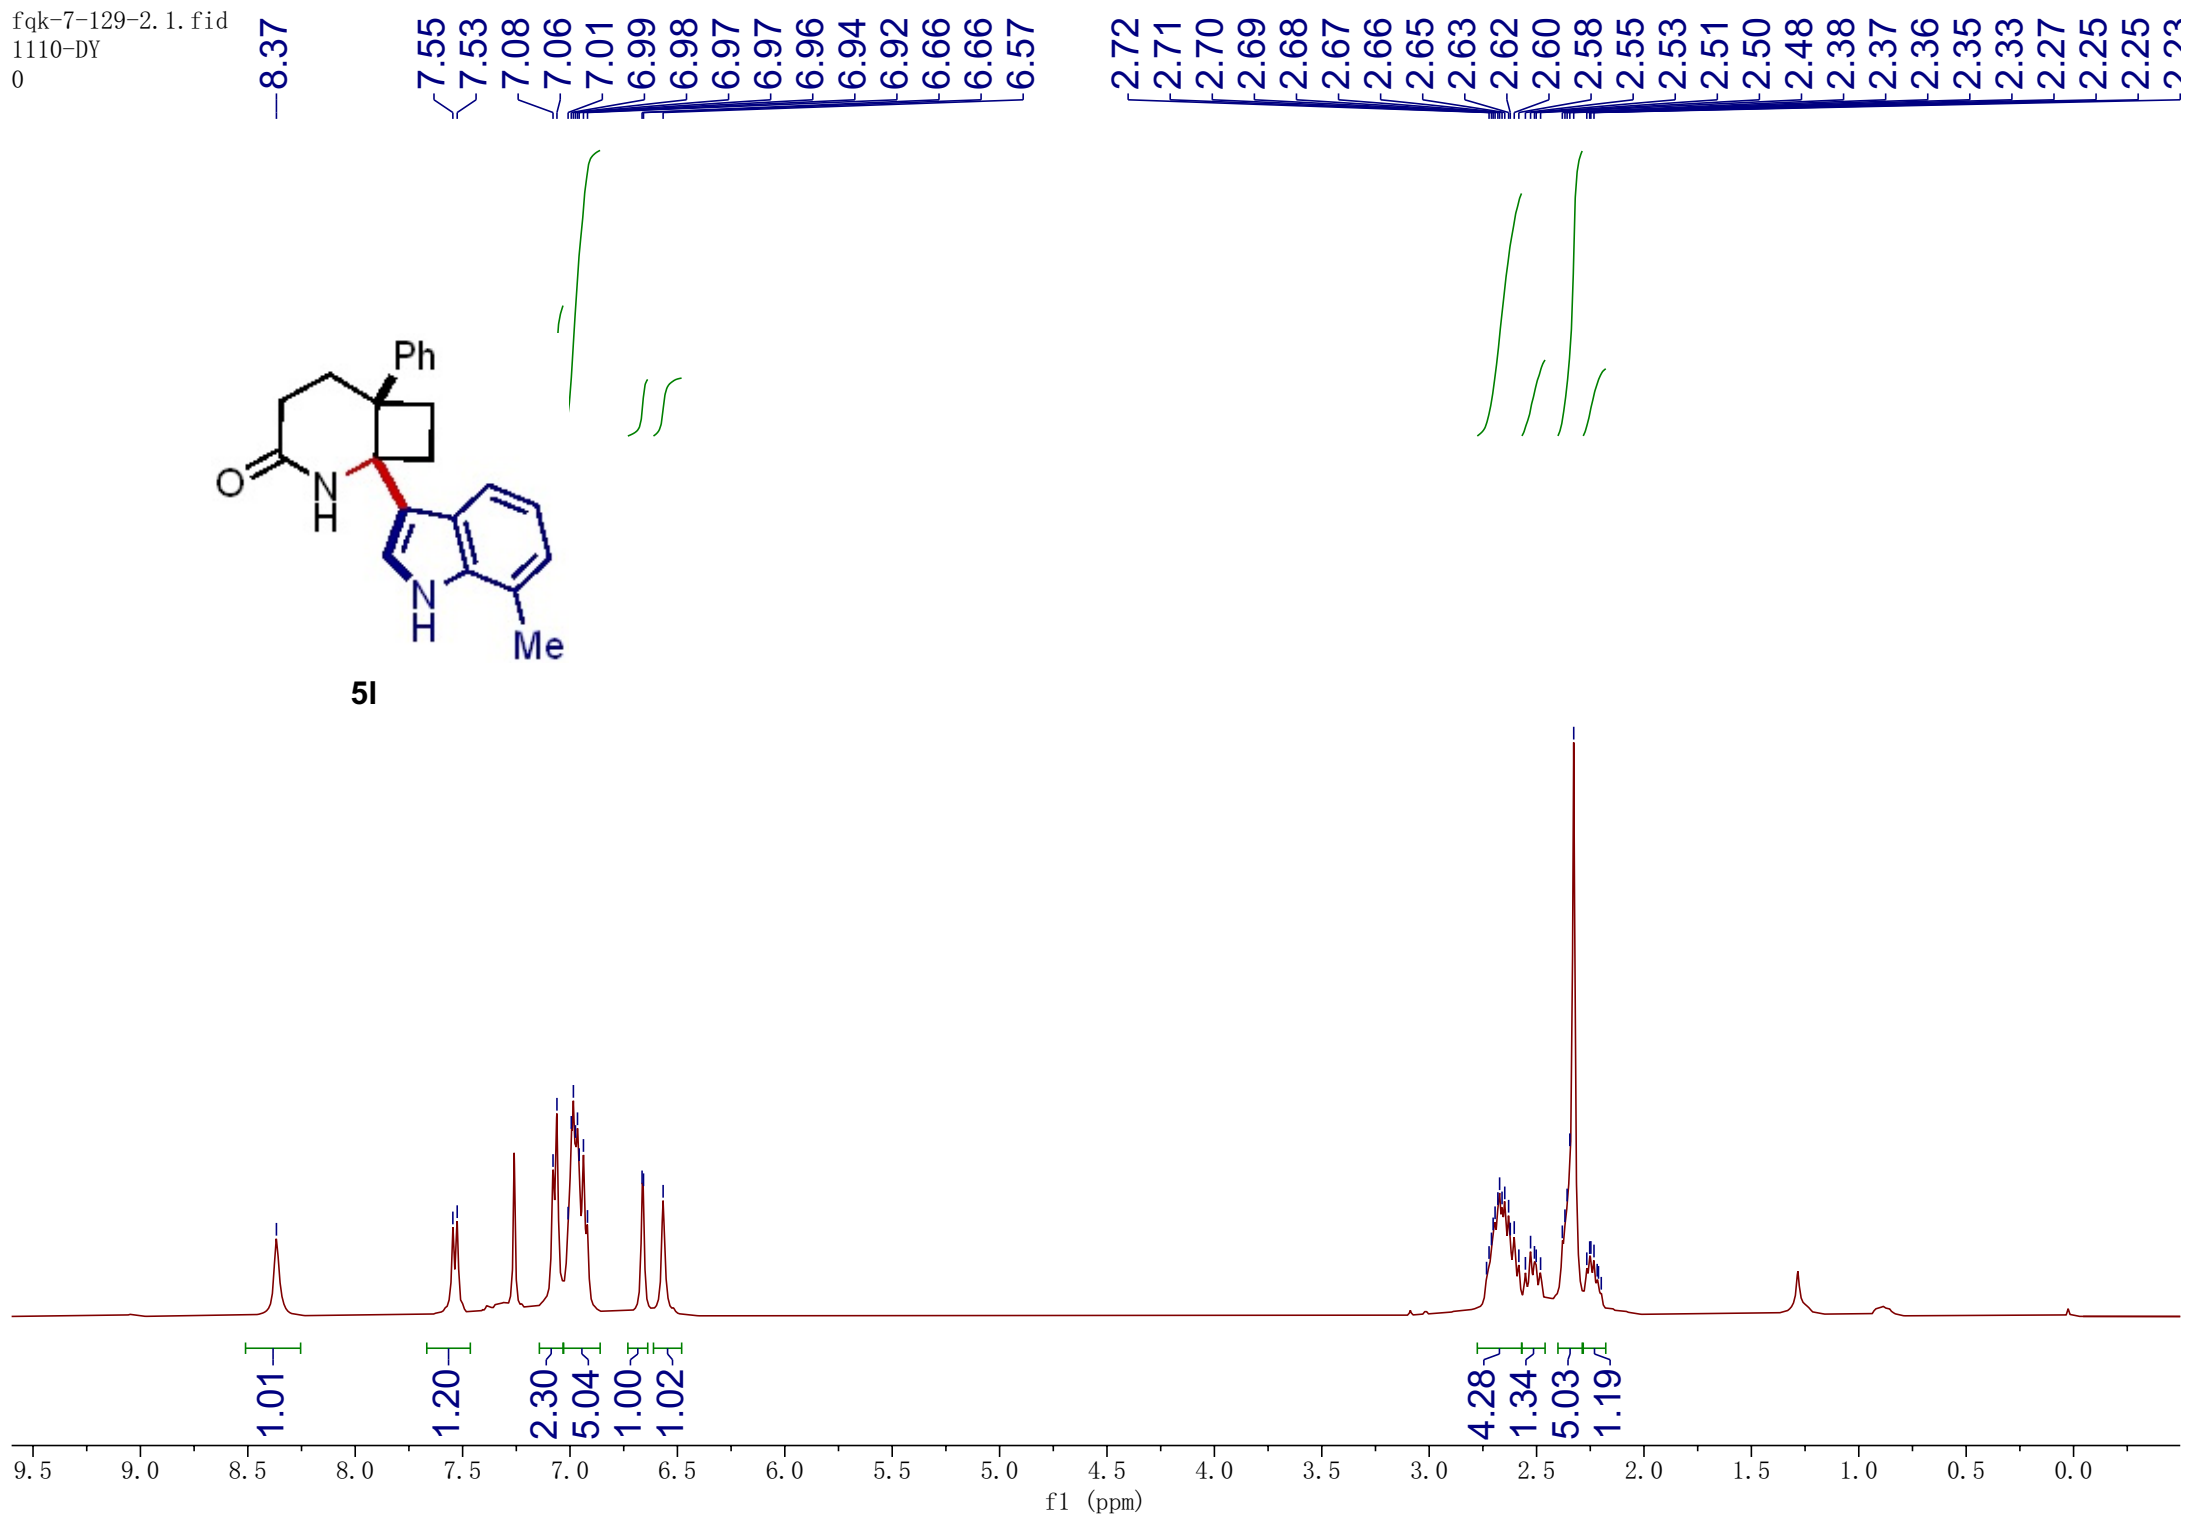

—173.12  
—144.85  
—136.09  
—127.57  
—126.52  
—126.00  
—125.34  
—122.57  
—122.18  
—120.69  
—120.14  
—118.06  
—117.94  
—62.60  
—50.35  
—35.48  
—34.91  
—29.01  
—25.70  
—16.64

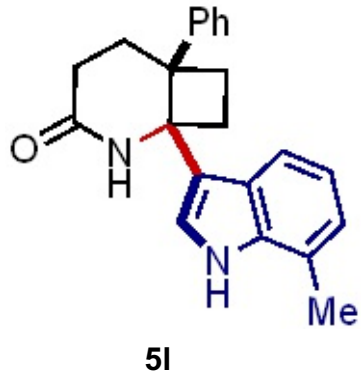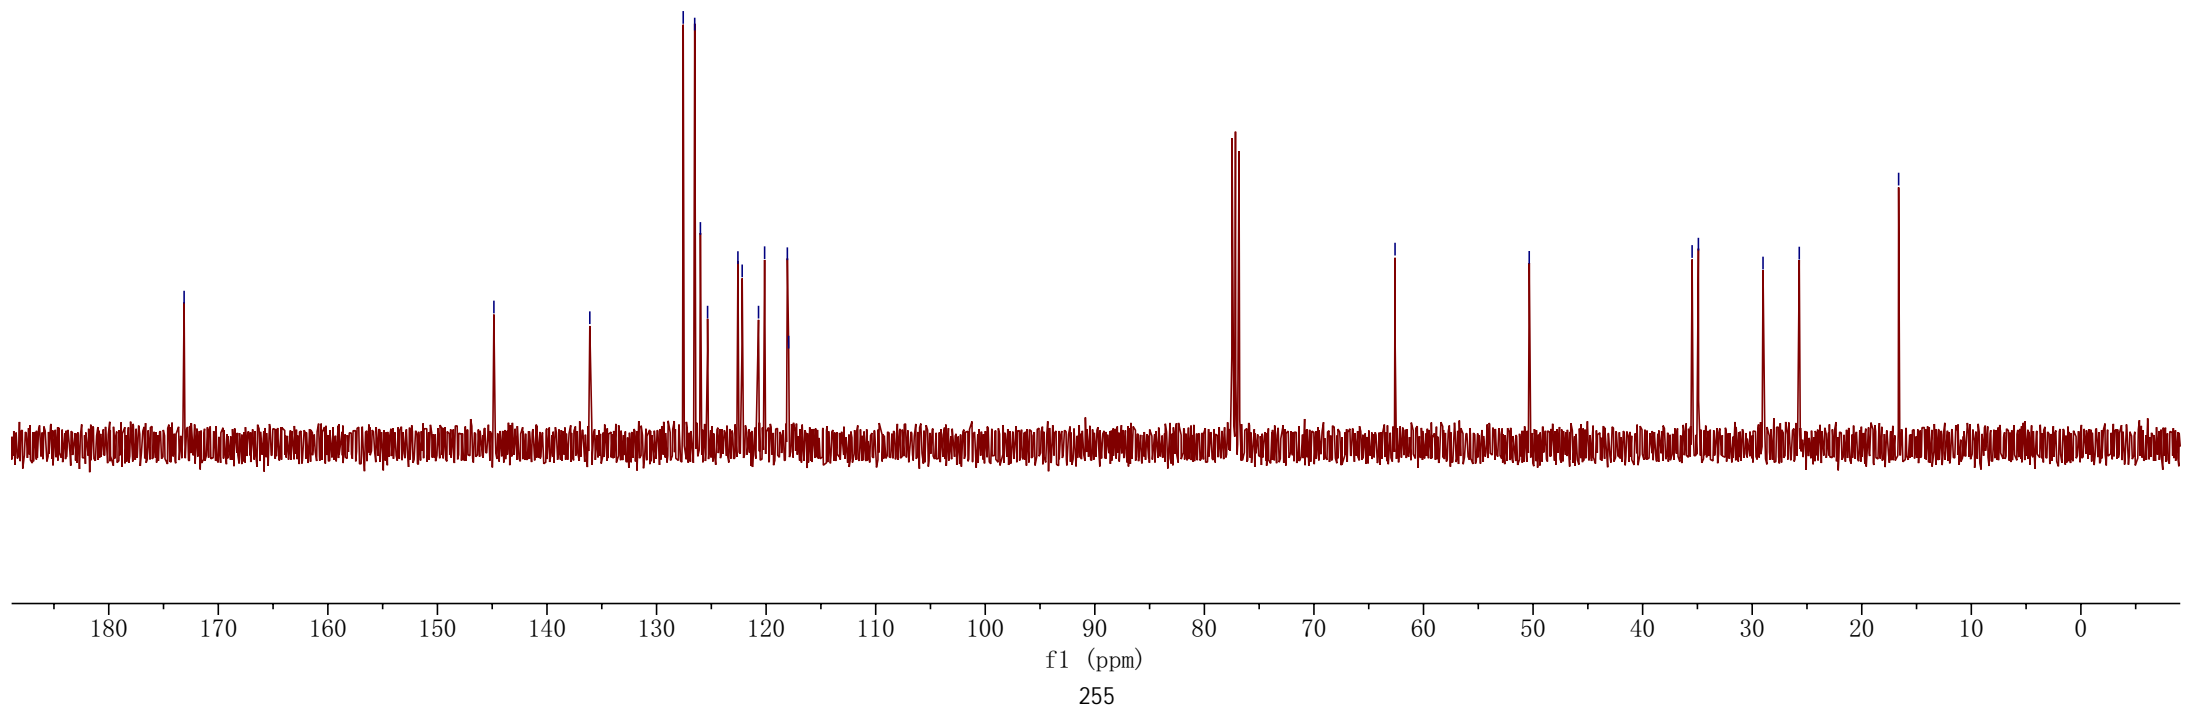

fid  
7.135-7.1  
PROTON

7.14 7.12 7.10 7.08 7.06 6.99 6.98 6.66 6.65 6.45 6.44 6.42 2.70 2.68 2.66 2.65 2.64 2.62 2.61 2.60 2.59 2.58 2.56 2.56 2.53 2.52 2.52 2.50 2.41 2.38 2.37 2.36 2.35 2.34 2.34 2.32 2.32 2.17 2.16 2.15 2.14 2.13 2.12 2.12 1.54 1.52 1.50 1.49 0.83 0.81 0.79

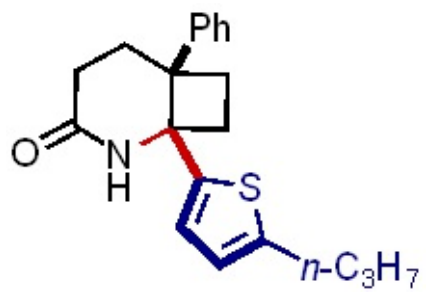

5m

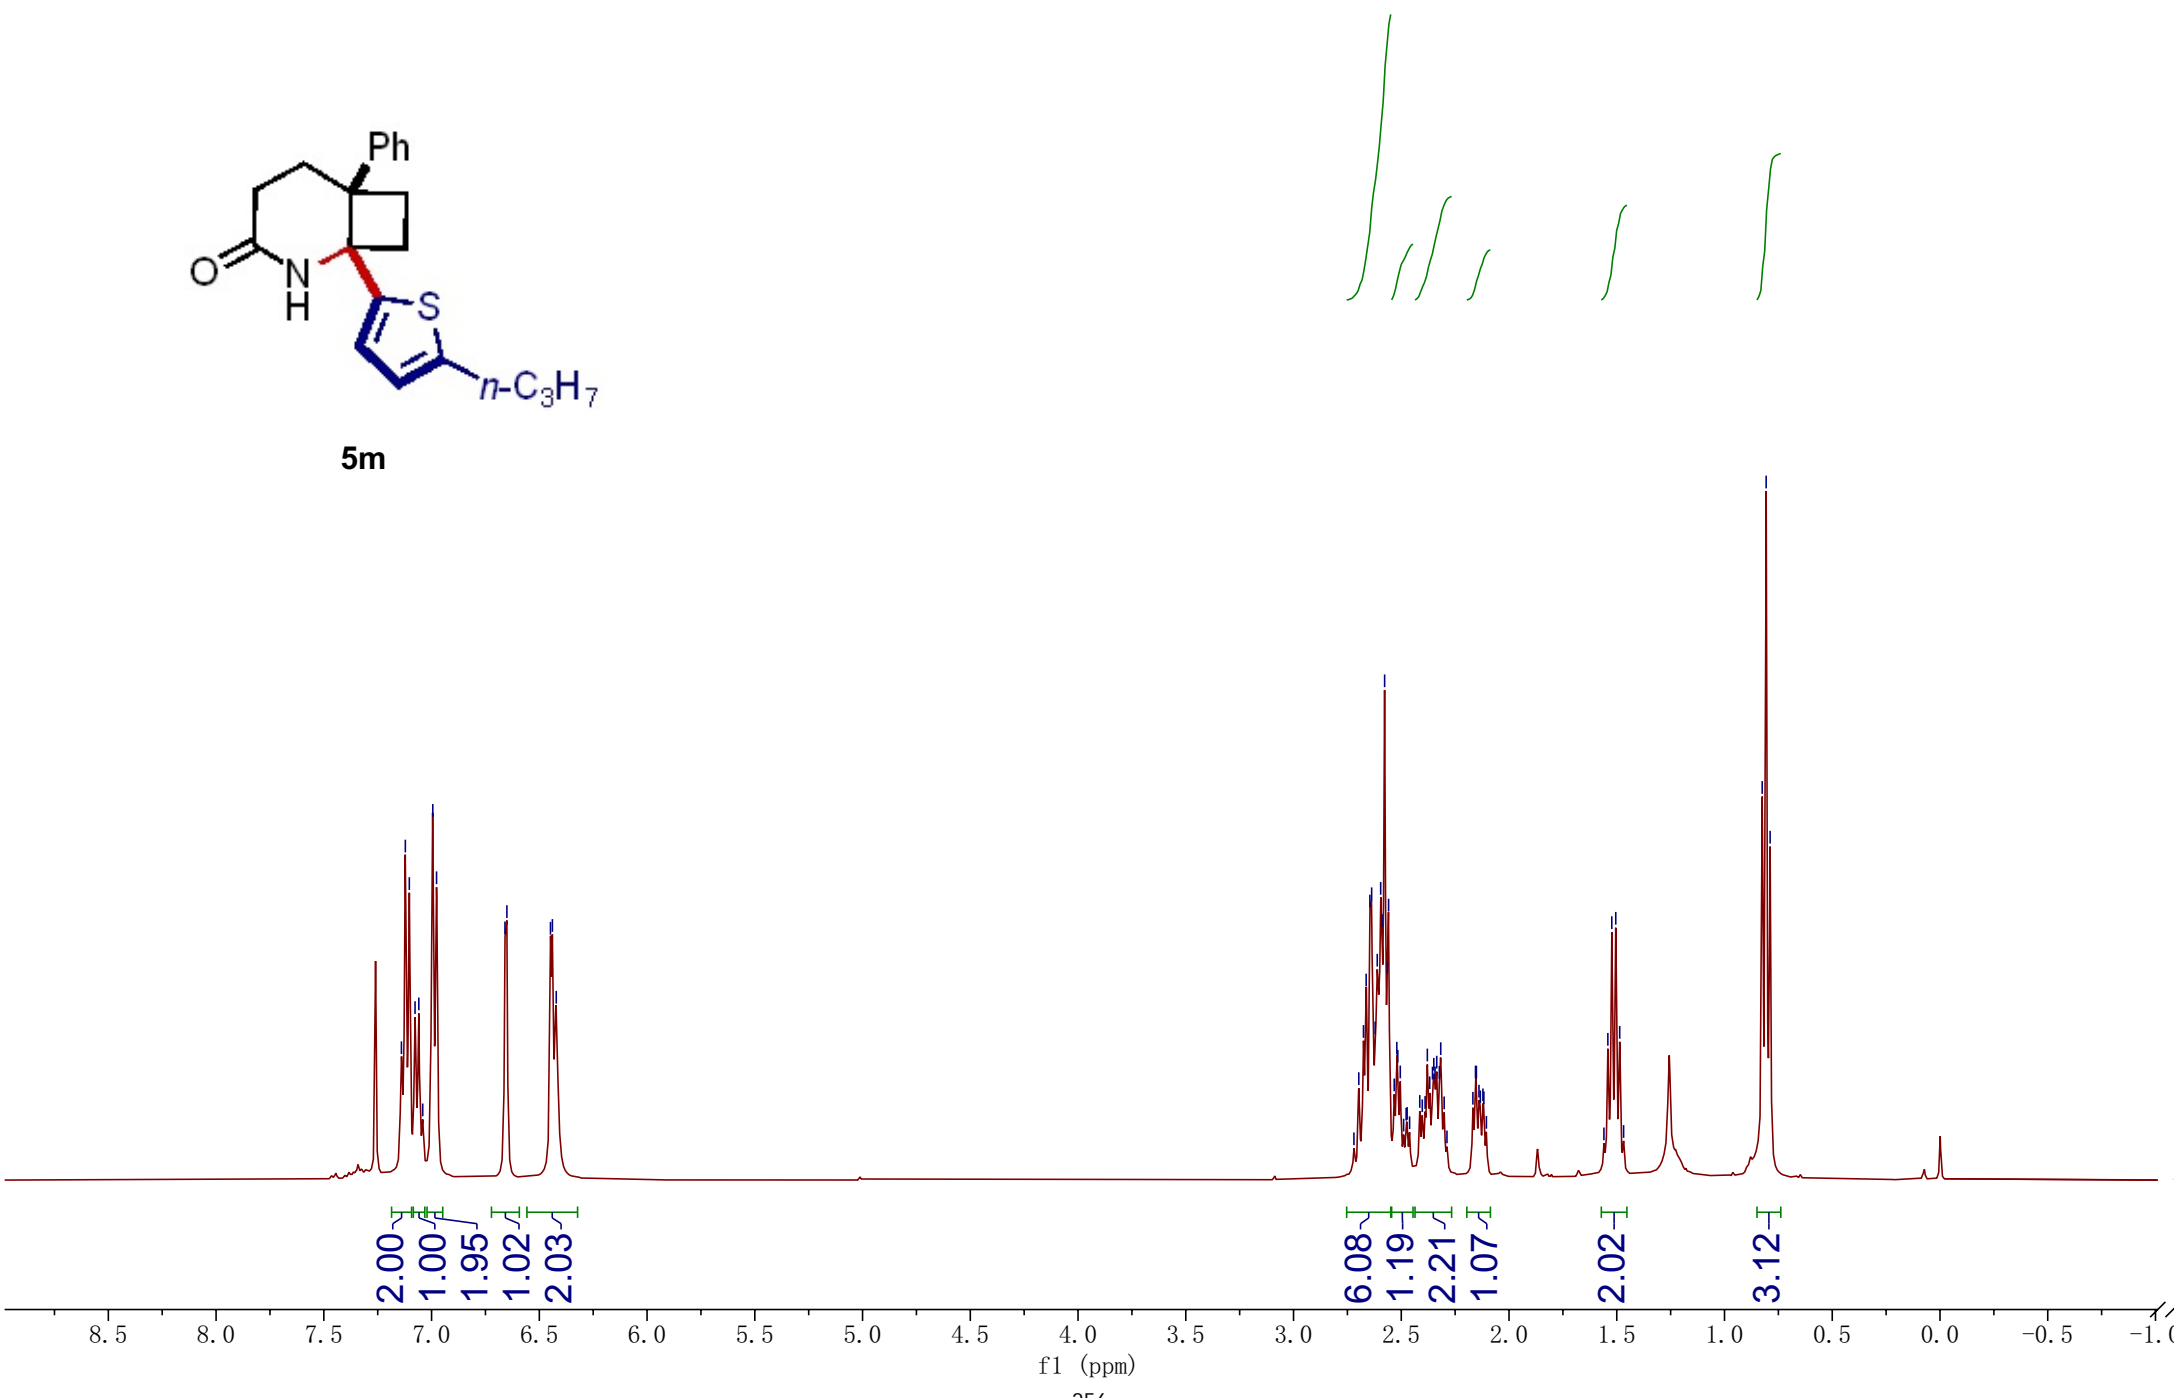

f1 (ppm)

256

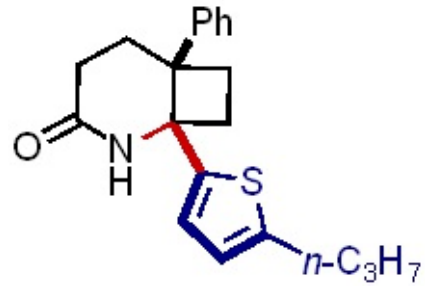

5m

—172.83

145.08

144.70

144.64

127.72

126.42

126.07

124.24

123.68

—63.90

—50.80

36.89

35.54

31.97

28.66

26.40

24.80

—13.38

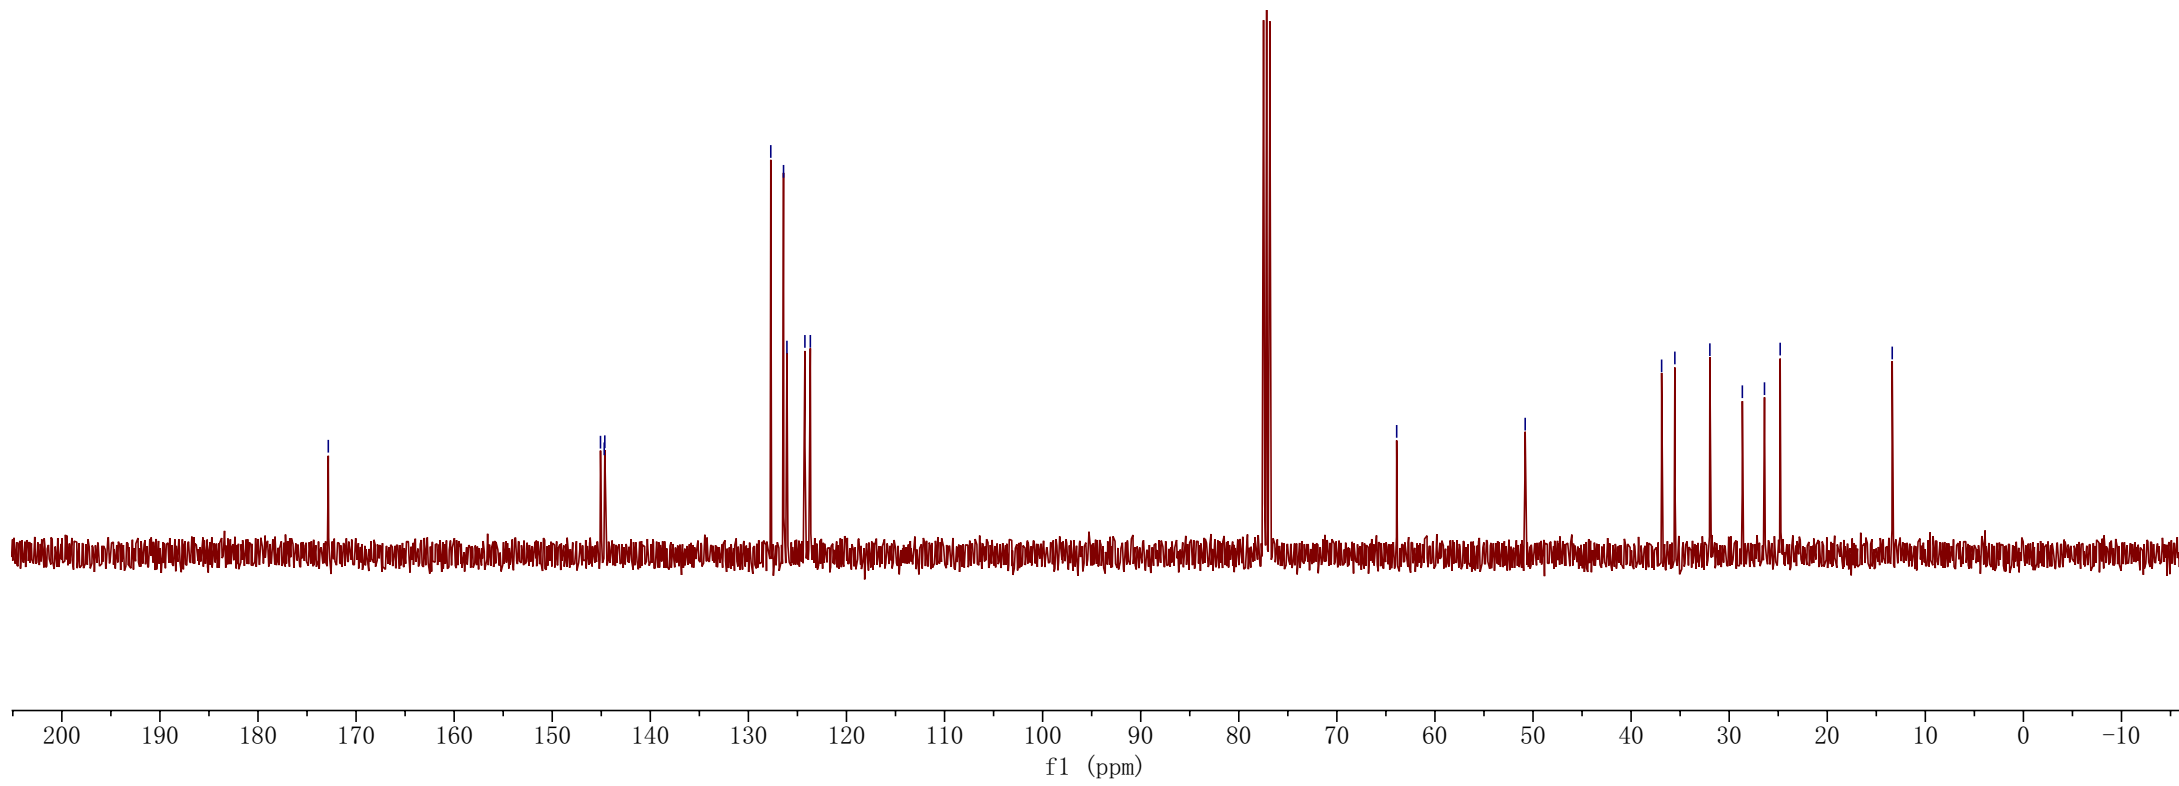

7.466 7.444 7.422 7.26 7.24 7.22 7.14 7.12 6.18 5.74 5.71 5.22 5.19 5.17 5.13 2.55 2.54 2.53 2.52 2.50 2.48 2.39 2.38 2.36 2.35 2.34 2.33 2.32 2.24 2.22 2.21 2.20 2.19 2.17 2.16 2.13 2.12 2.10 2.09 2.07 2.06 2.05 2.05 2.03 2.02 2.01 2.00 1.98 1.96 1.95

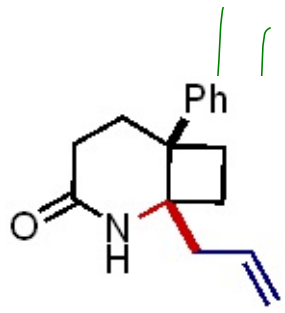

5n

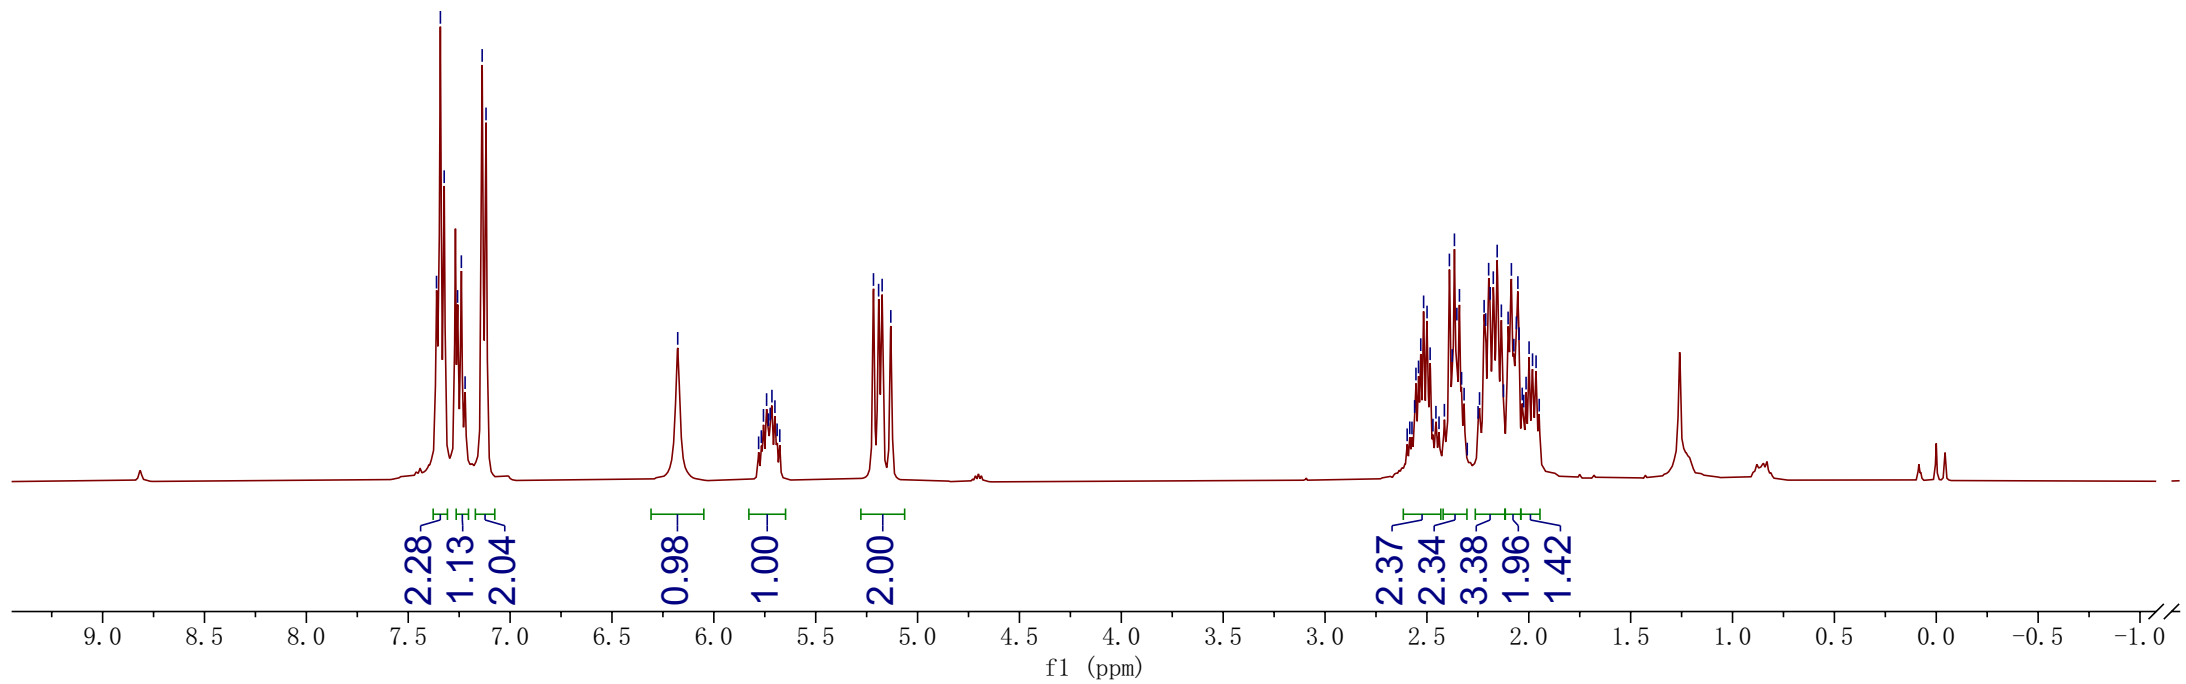

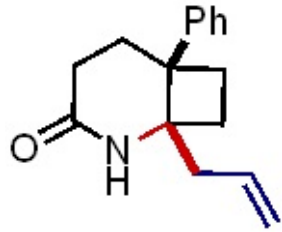

5n

—173.06

—144.44

131.73

128.31

126.64

126.53

120.96

—59.13

48.11

41.60

35.60

31.32

29.13

25.36

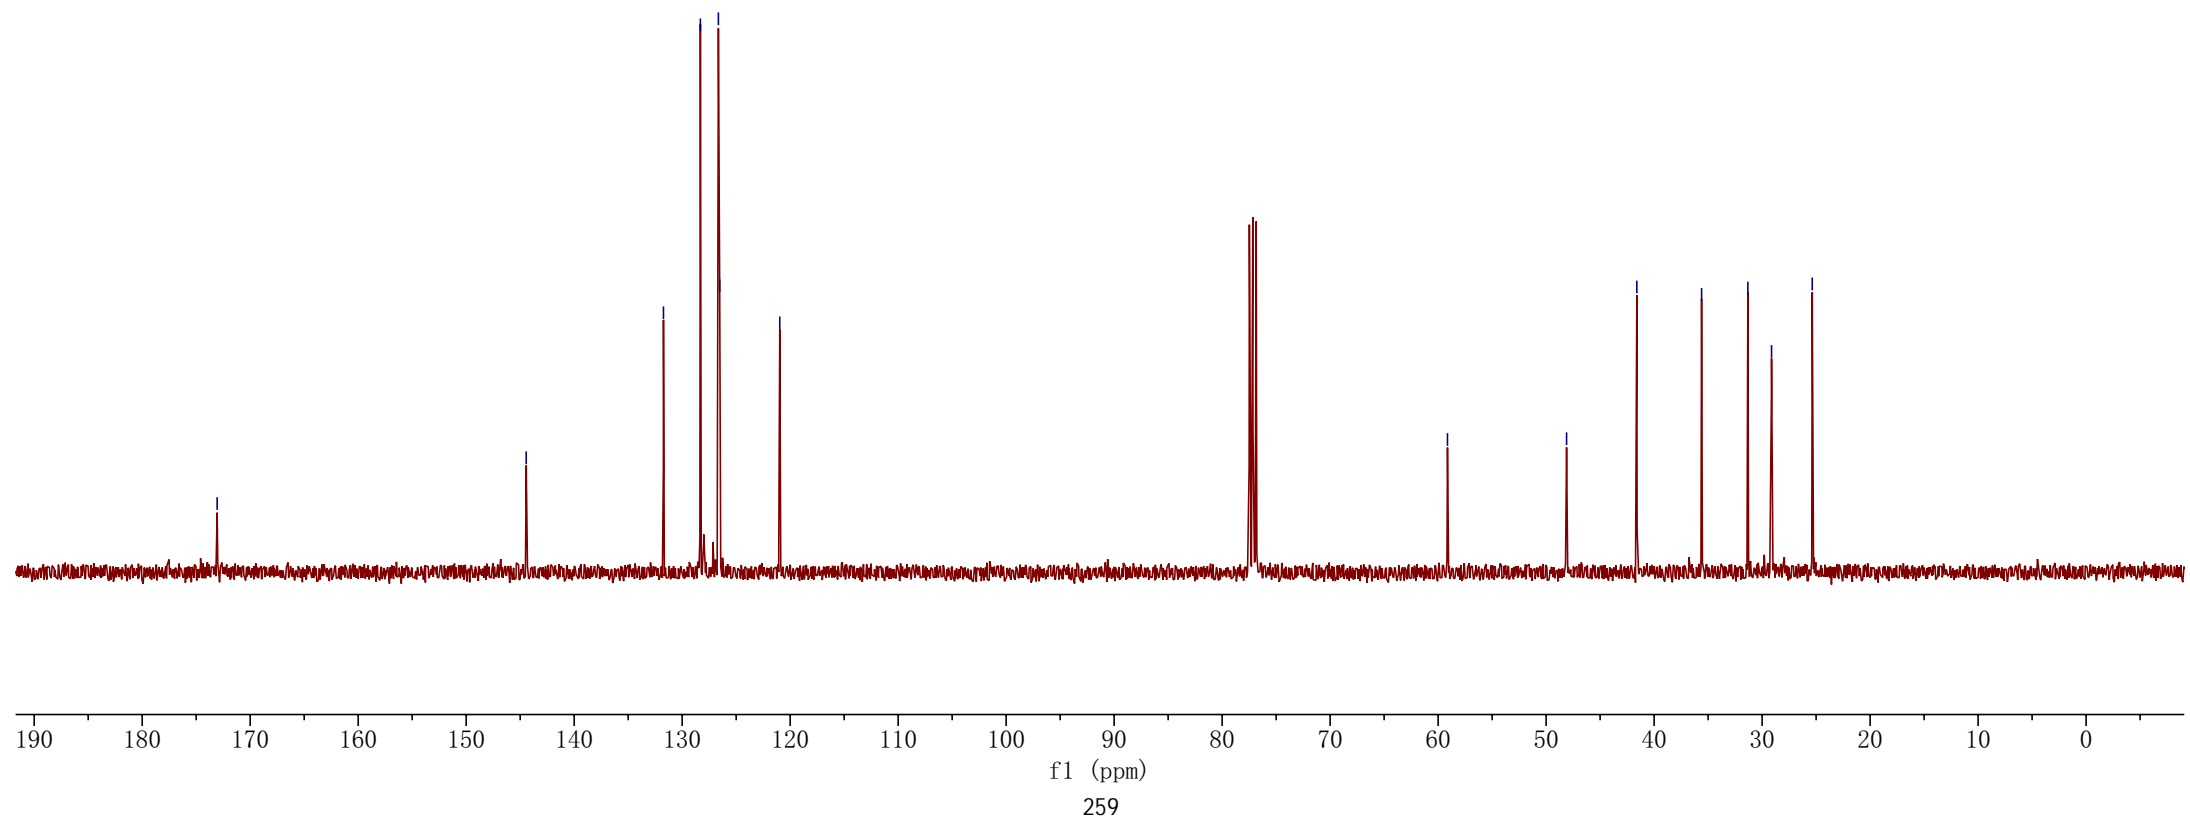

7.37 7.35 7.35 7.20 7.18 7.00 6.99 6.97 6.97 6.95 6.94 6.92 6.90 6.88 6.87 6.87 6.87 6.86 6.85 6.85 6.83 6.83 6.82 6.54 4.00 3.98 2.65 2.64 2.63 2.63 2.62 2.61 2.59 2.58 2.58 2.51 2.49 2.41 2.40 2.29 2.28 2.24 2.22 2.21 1.90 1.66 1.65 1.64 1.63 0.94 0.93

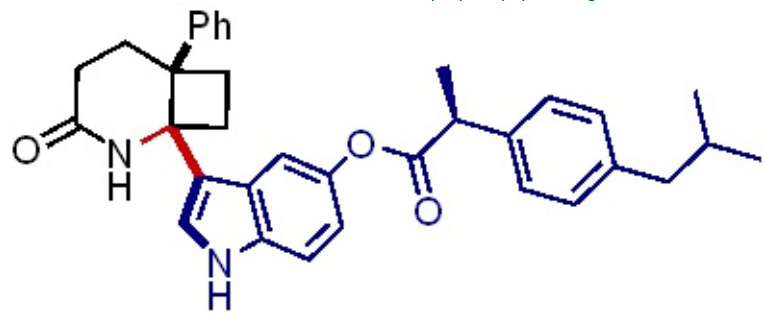

5o

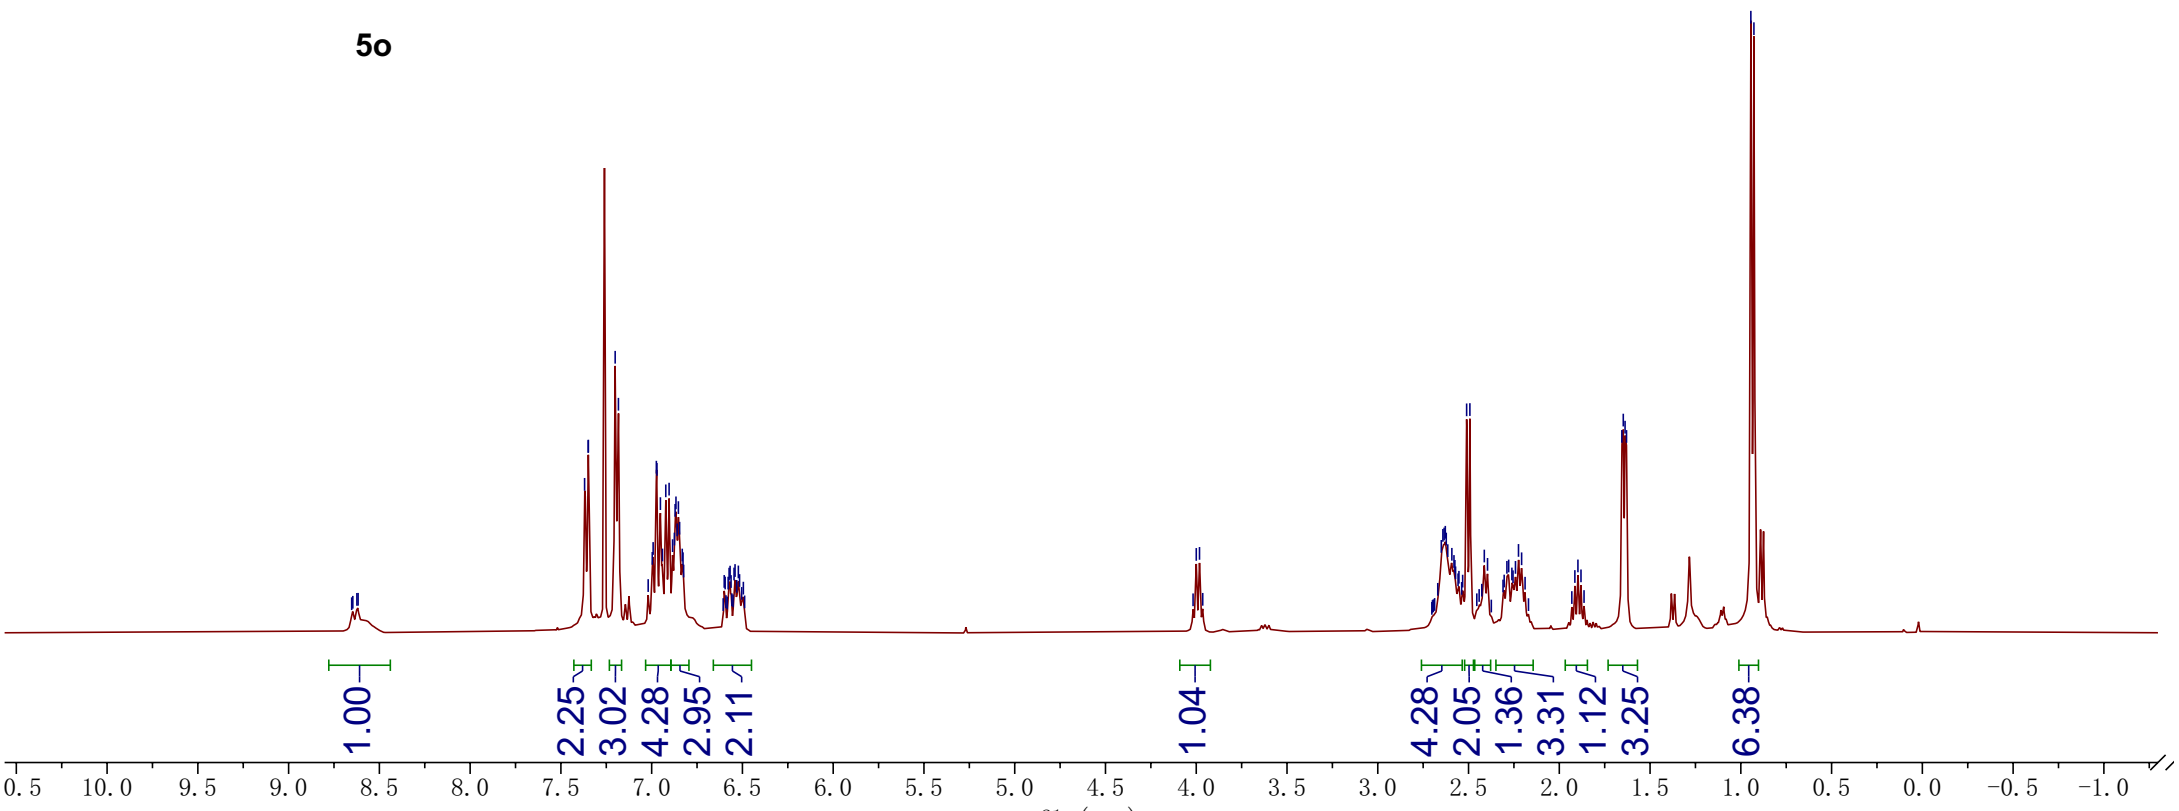

f1 (ppm)

174.50  
173.66  
144.42  
144.37  
144.17  
140.78  
140.75  
137.74  
137.69  
134.38  
129.60  
129.28  
127.53  
127.49  
127.36  
127.32  
126.40  
126.04  
126.01  
125.70  
125.67  
124.00  
117.18  
115.81  
112.14  
112.05  
111.92

62.51  
62.48

50.35  
45.33  
45.14  
35.06  
34.61  
34.43  
30.28  
30.20  
29.03  
25.28  
22.51  
22.47  
18.73

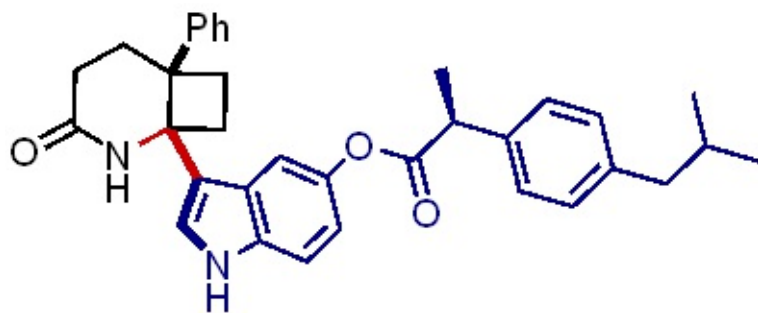

5o

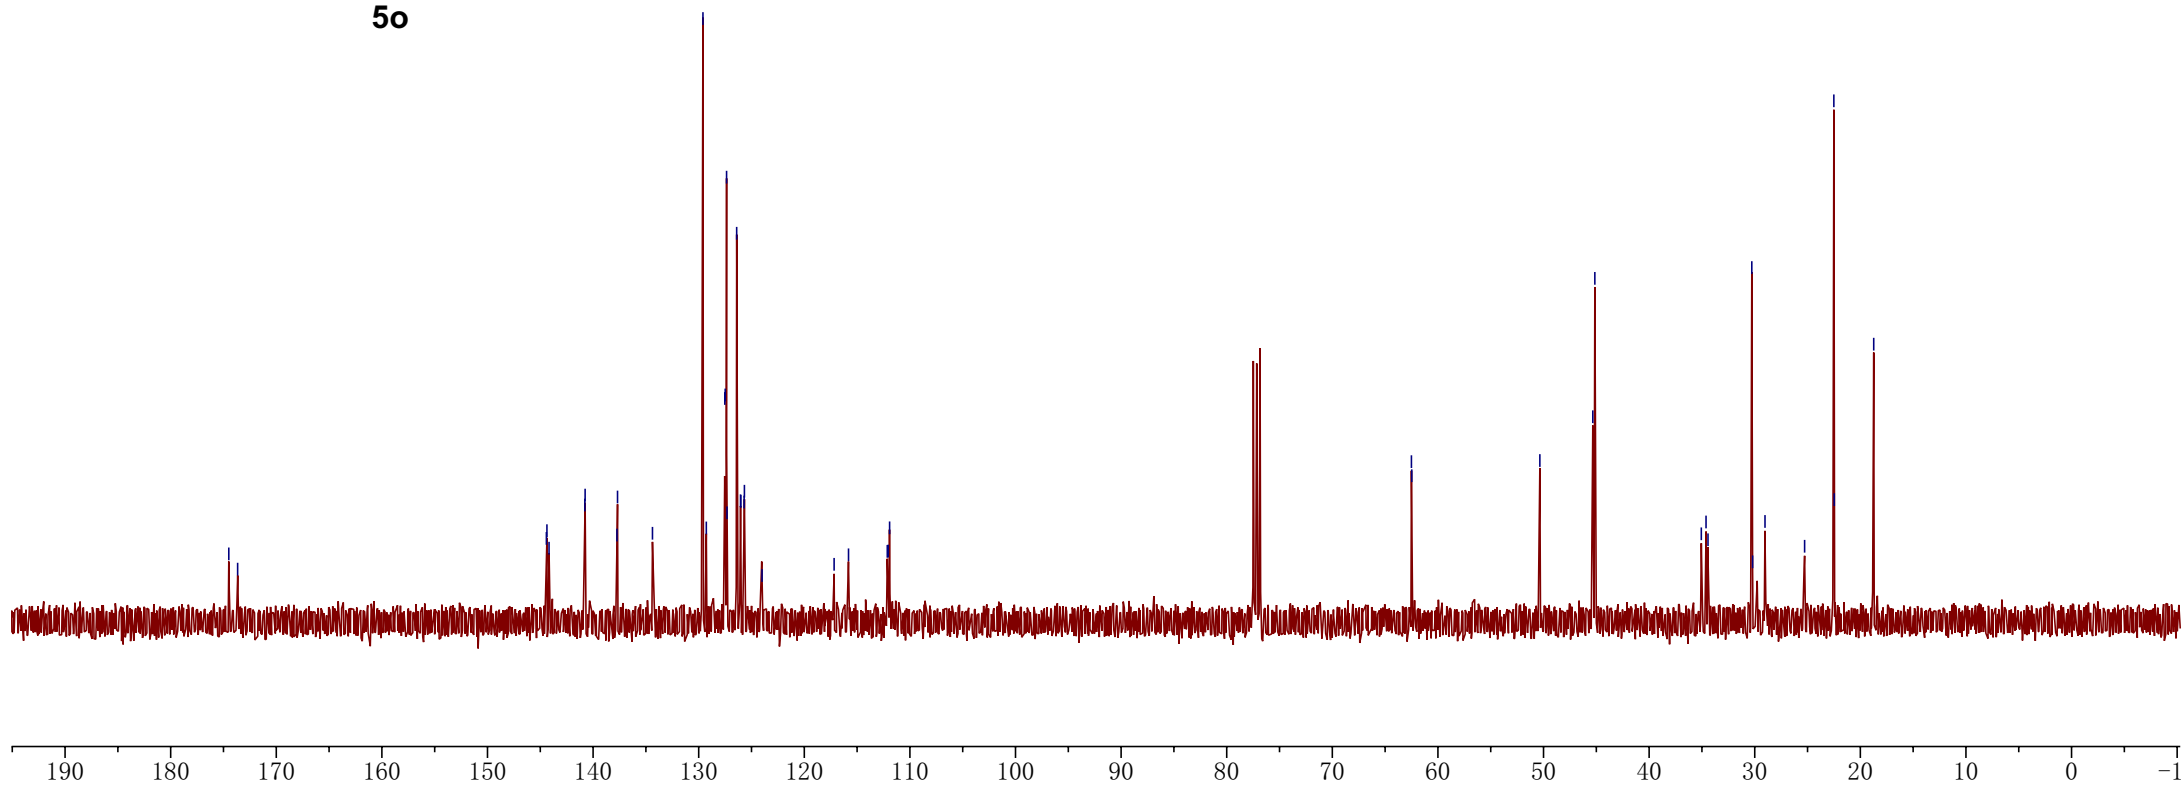

f1 (ppm)

8.411 7.814 7.800 7.778 7.777 7.776 7.775 7.56 7.54 7.22 7.21 7.19 7.19 7.18 7.17 7.16 7.15 7.15 6.95 6.95 6.93 6.93 6.91 6.91 6.90 6.90 6.89 6.88 6.87 6.86 6.86 6.84 6.84 6.56 6.55 6.54 6.48 6.46 4.15 4.13 3.91 2.63 2.62 2.61 2.60 2.59 2.19 2.17 1.74 1.73 1.72 1.71

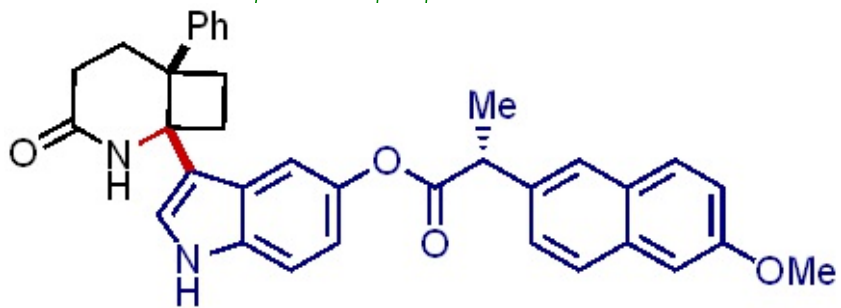

5p

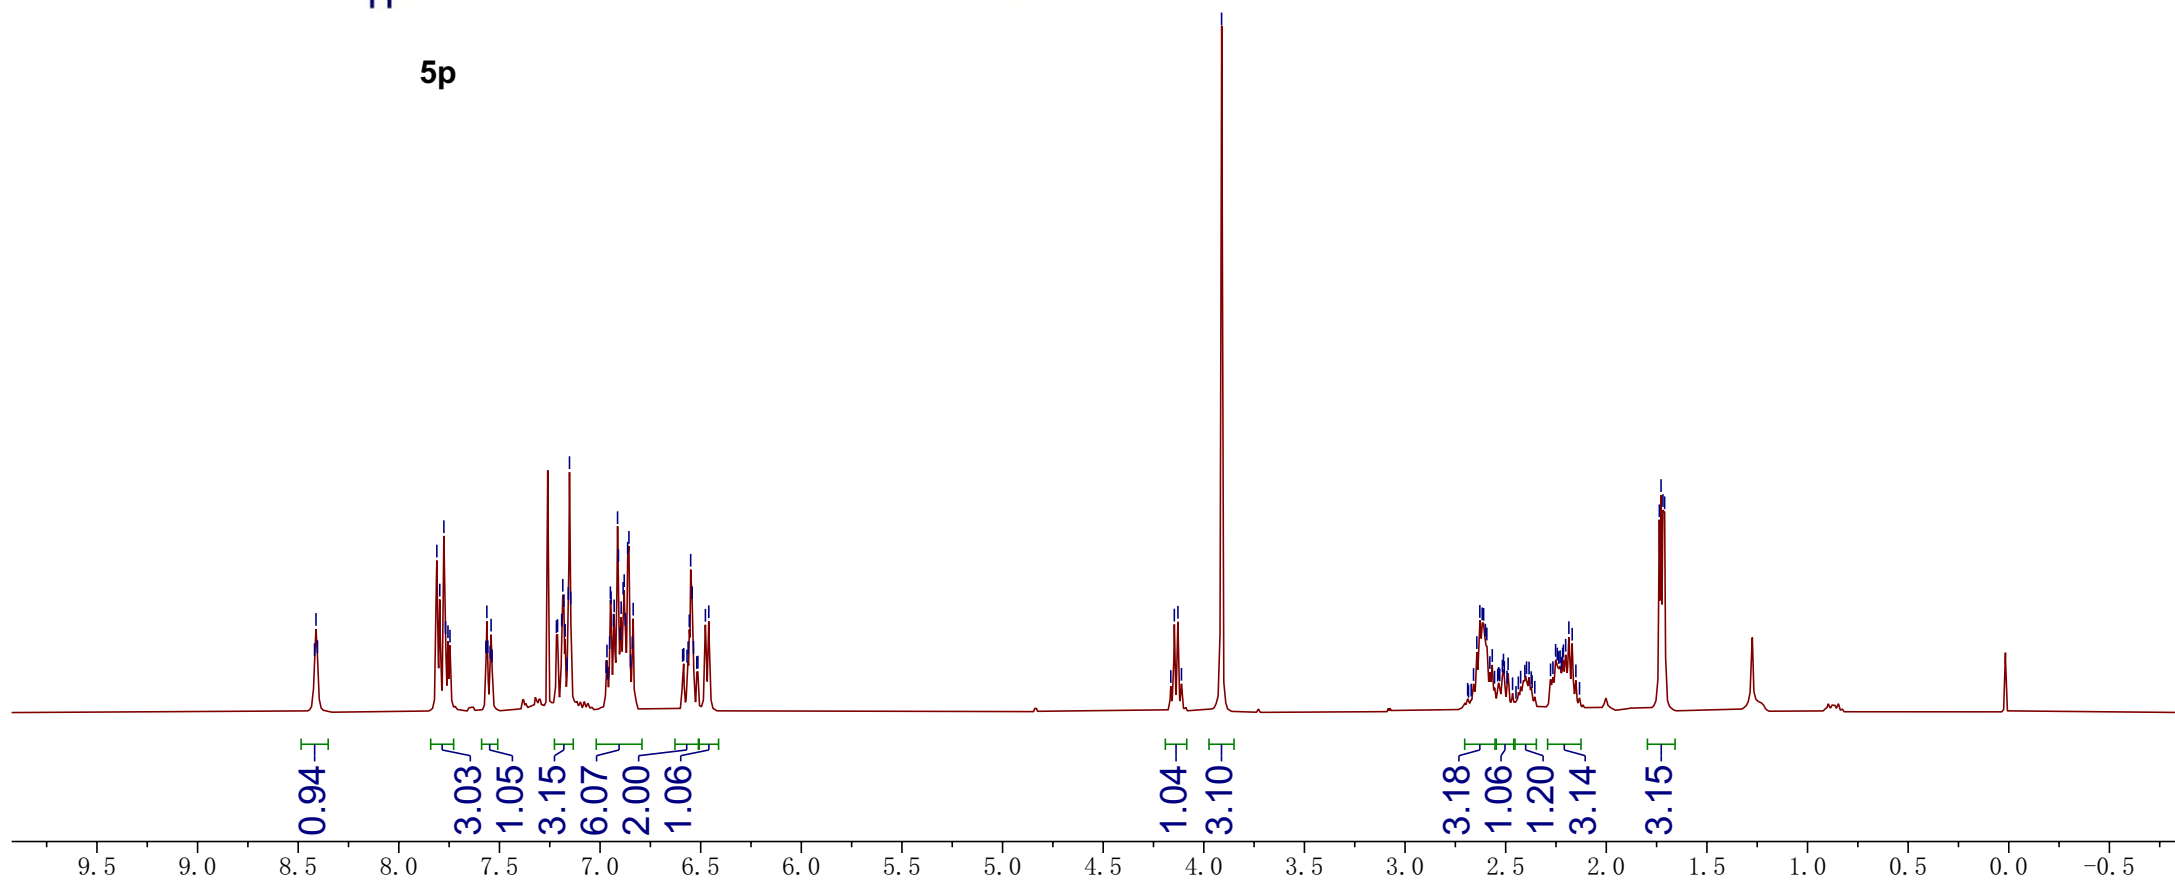

174.26  
173.28  
173.24

157.73  
144.36  
144.31  
144.23  
144.21  
135.60  
135.57  
134.25  
133.83  
129.41  
129.39  
129.07  
127.47  
127.43  
126.37  
126.35  
126.32  
126.21  
125.97  
125.68  
123.79  
119.09  
117.55  
115.94  
115.86  
112.20  
112.08  
111.83  
105.69  
62.44  
62.40  
55.36  
50.34  
45.63  
45.61  
35.08  
34.53  
34.37  
29.11  
25.22  
25.15  
18.60

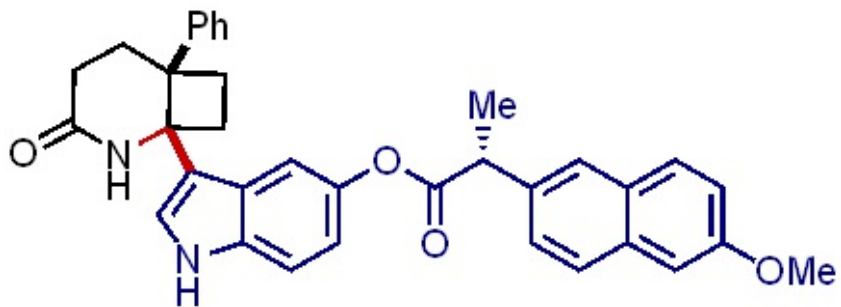

5p

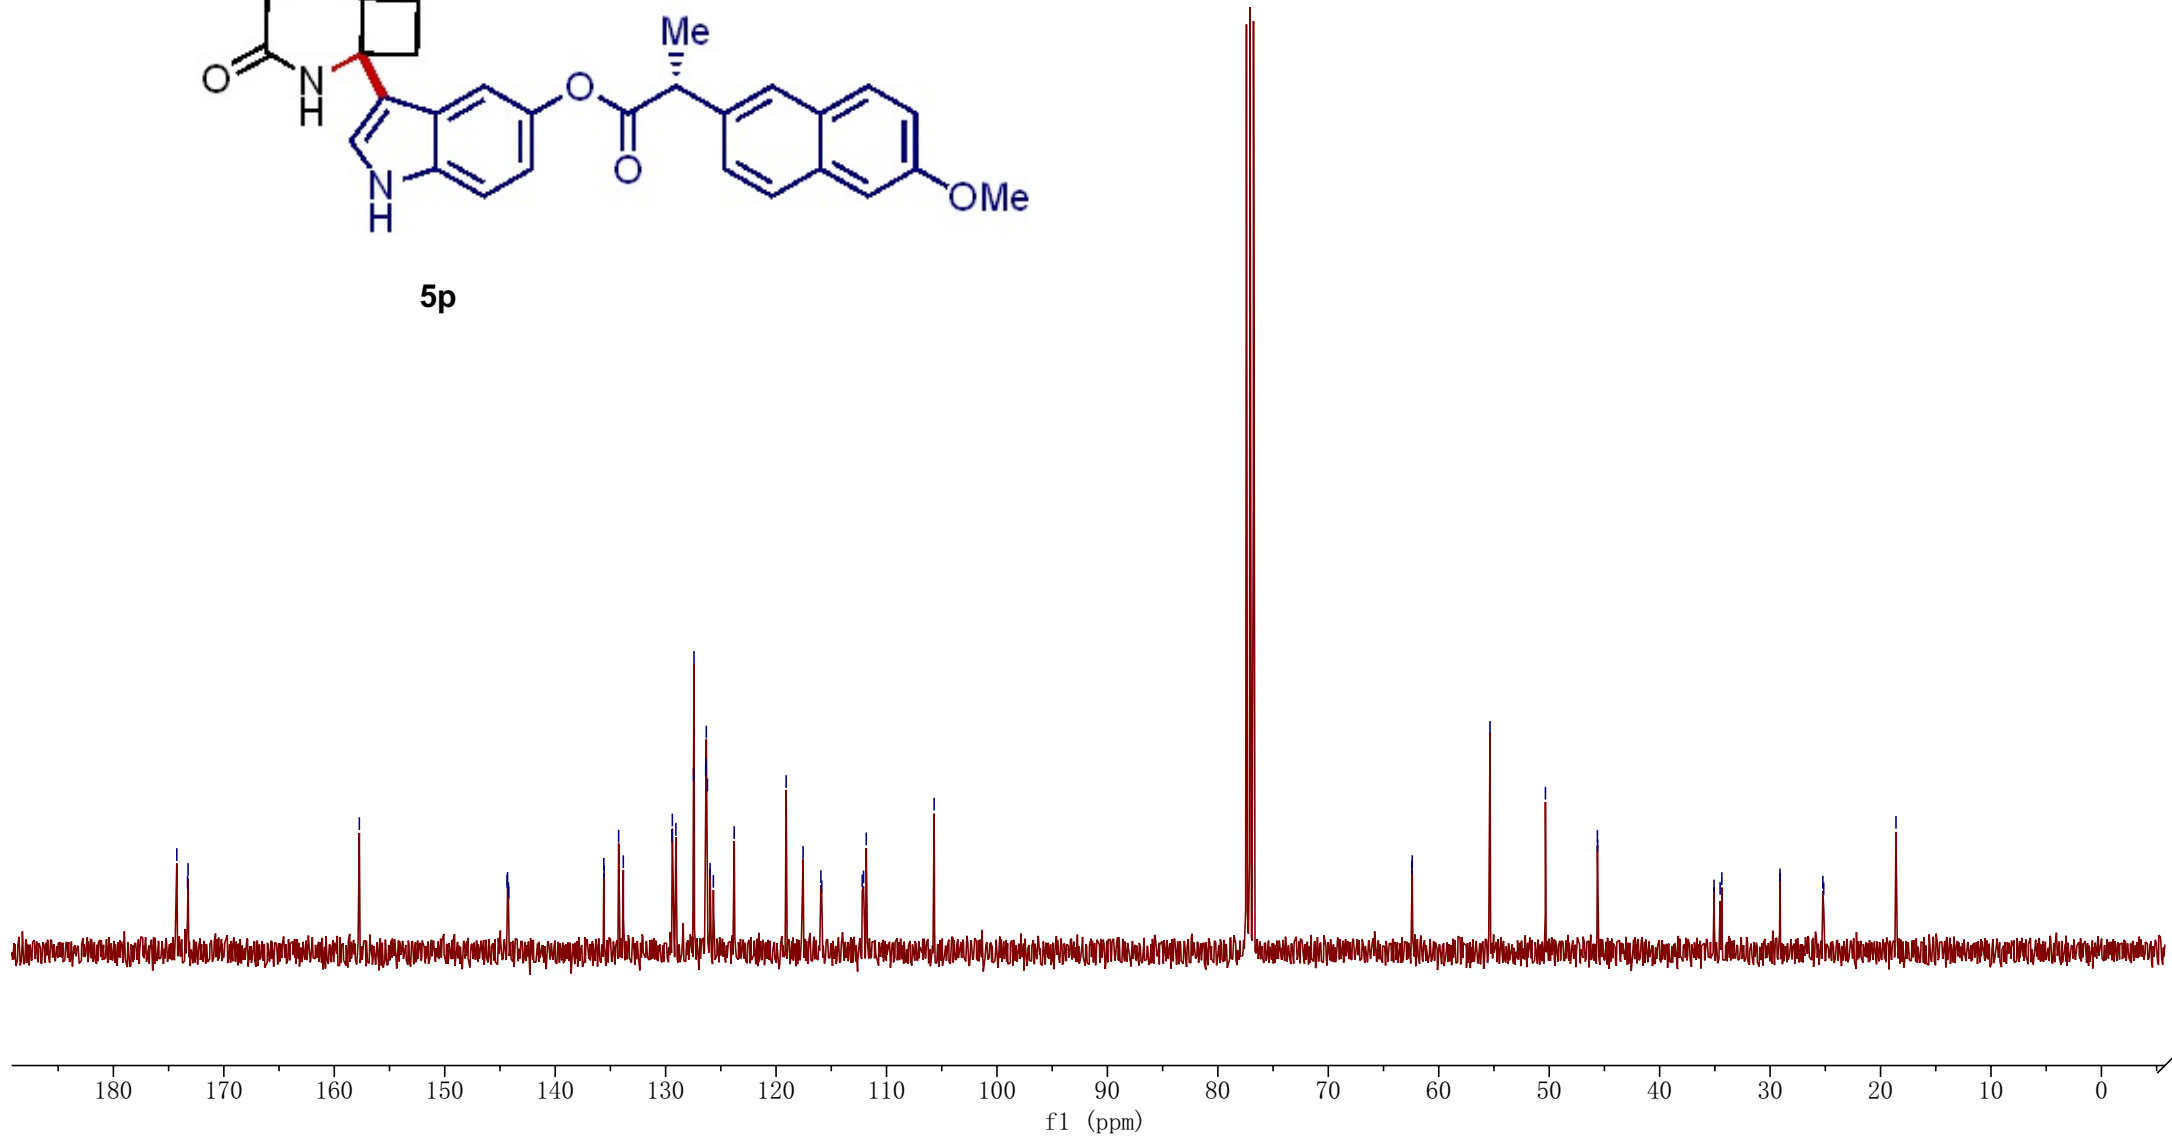

f1 (ppm)

263

7.31  
7.29  
7.14  
7.12  
7.10  
7.06  
7.04  
7.02  
5.96  
5.82  
3.69  
3.44  
3.43  
3.42  
3.41  
3.40  
3.39  
3.38  
3.38  
3.37  
3.36  
2.83  
2.83  
2.81  
2.80  
2.71  
2.71  
2.70  
2.69  
2.66  
2.63  
2.62  
2.60  
2.59  
2.58  
2.57  
2.56  
2.54  
2.53  
2.52  
2.50  
2.10  
2.09  
2.09  
2.08  
2.06  
2.05  
1.89  
1.87  
1.87  
1.84

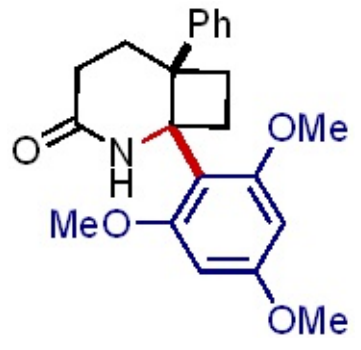

5q

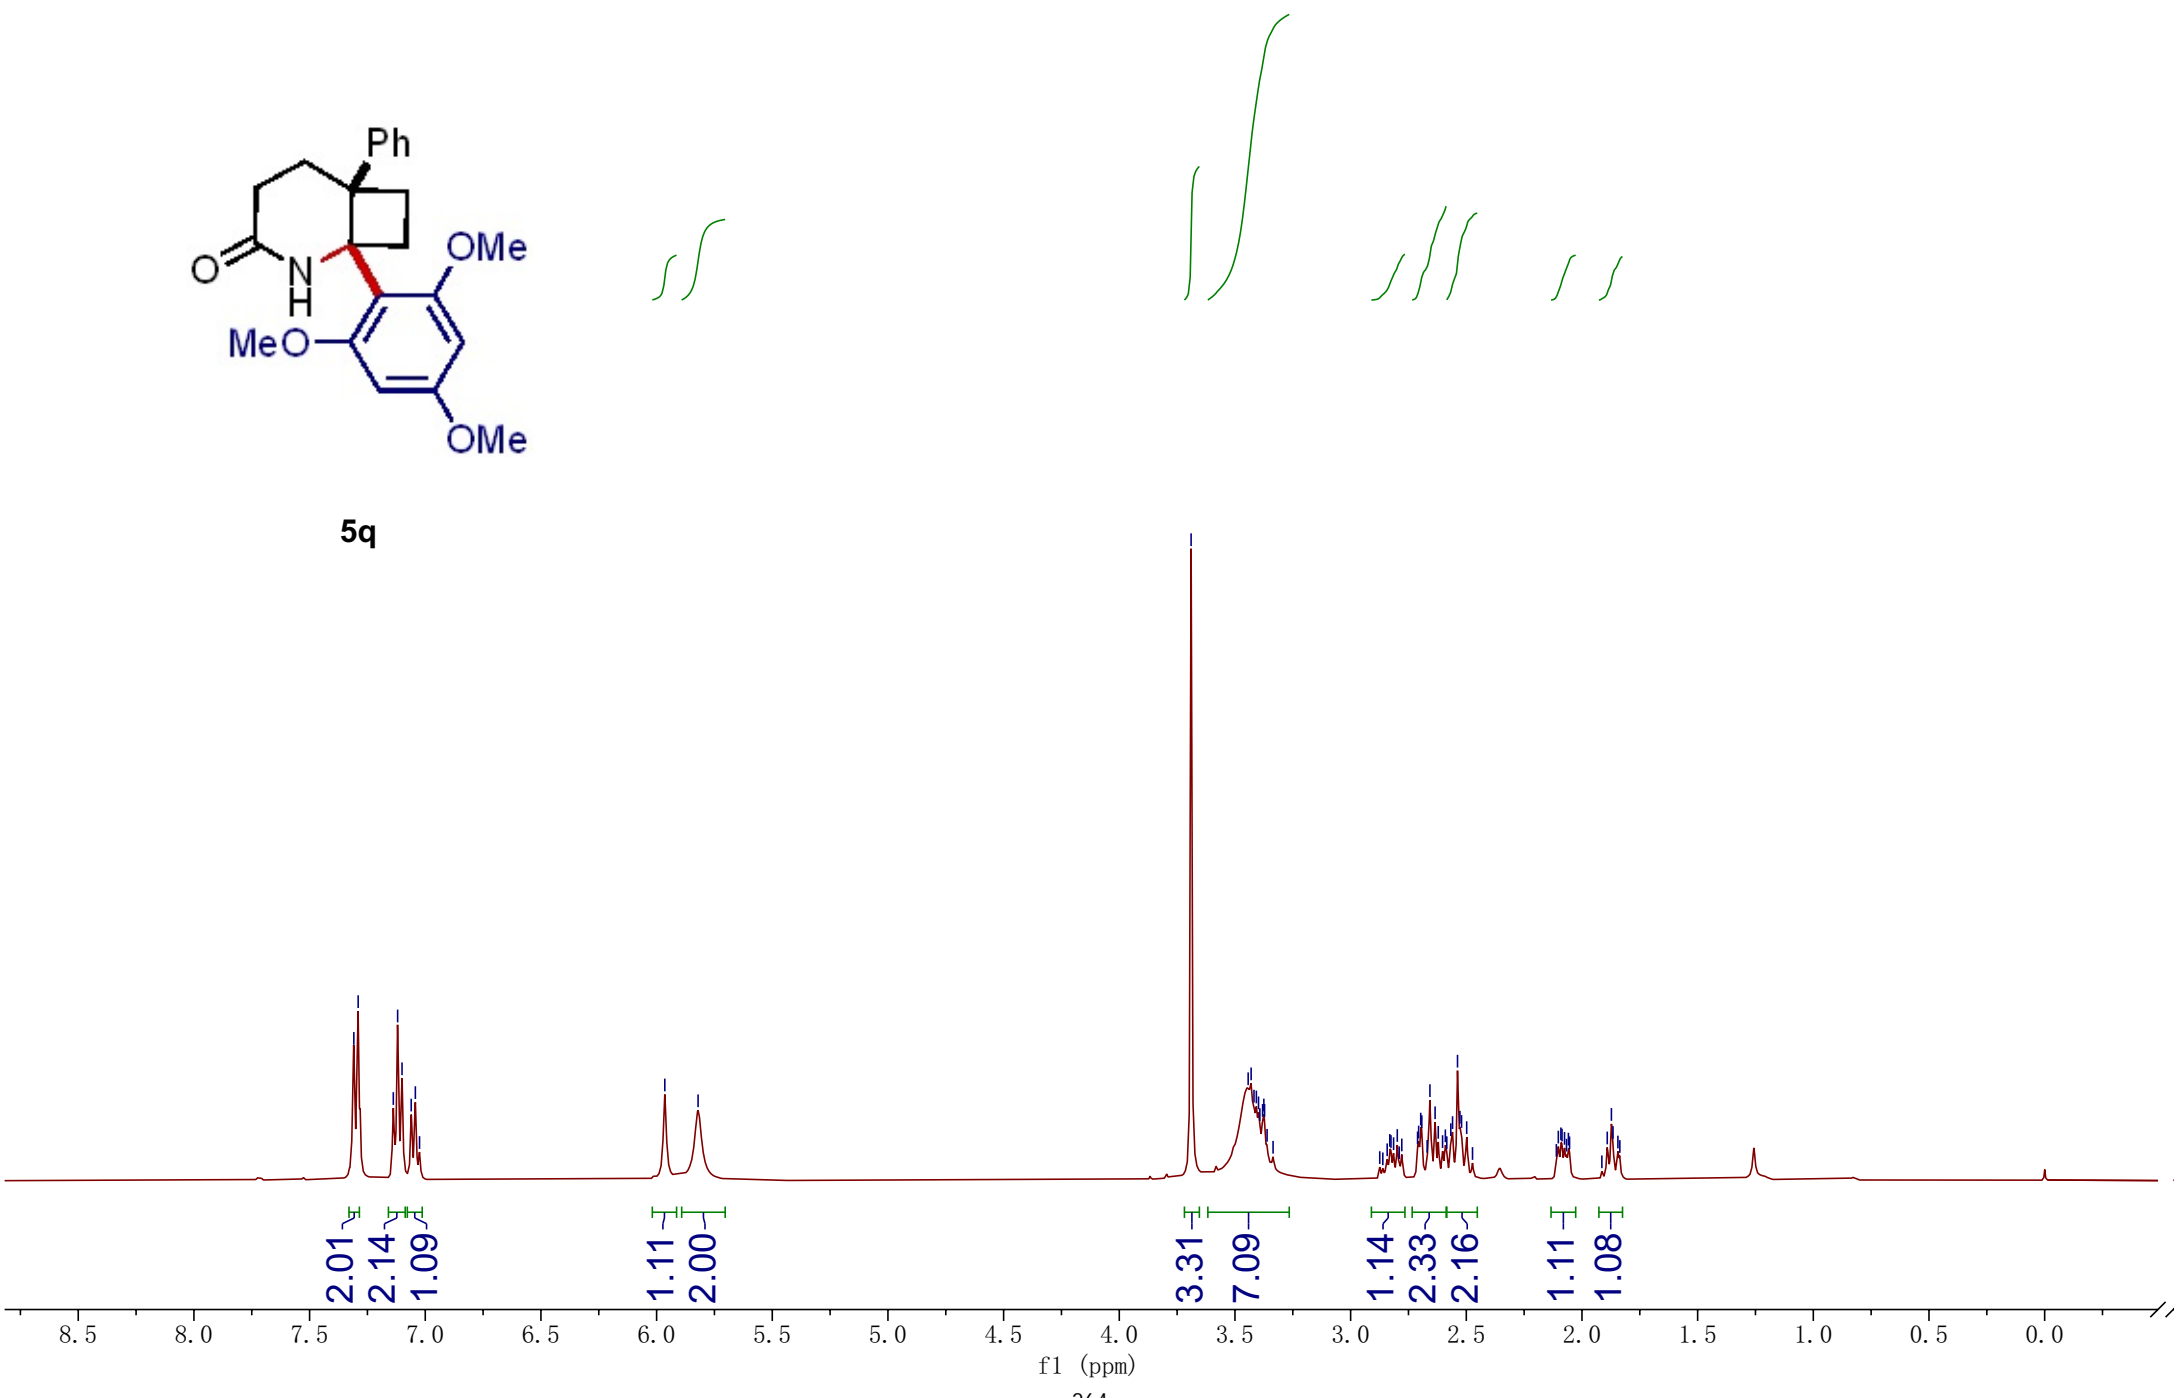

—171.18  
~160.71  
~158.69  
—146.44  
{127.07  
{125.49  
{125.38  
—110.70  
—90.35  
—64.91  
{55.12  
{54.72  
~48.45  
—37.78  
~28.40  
~27.23

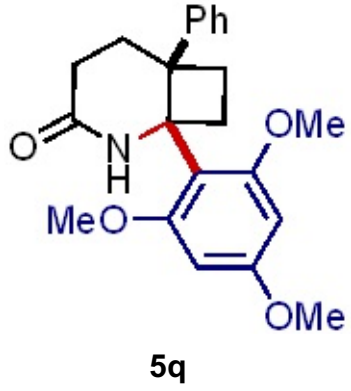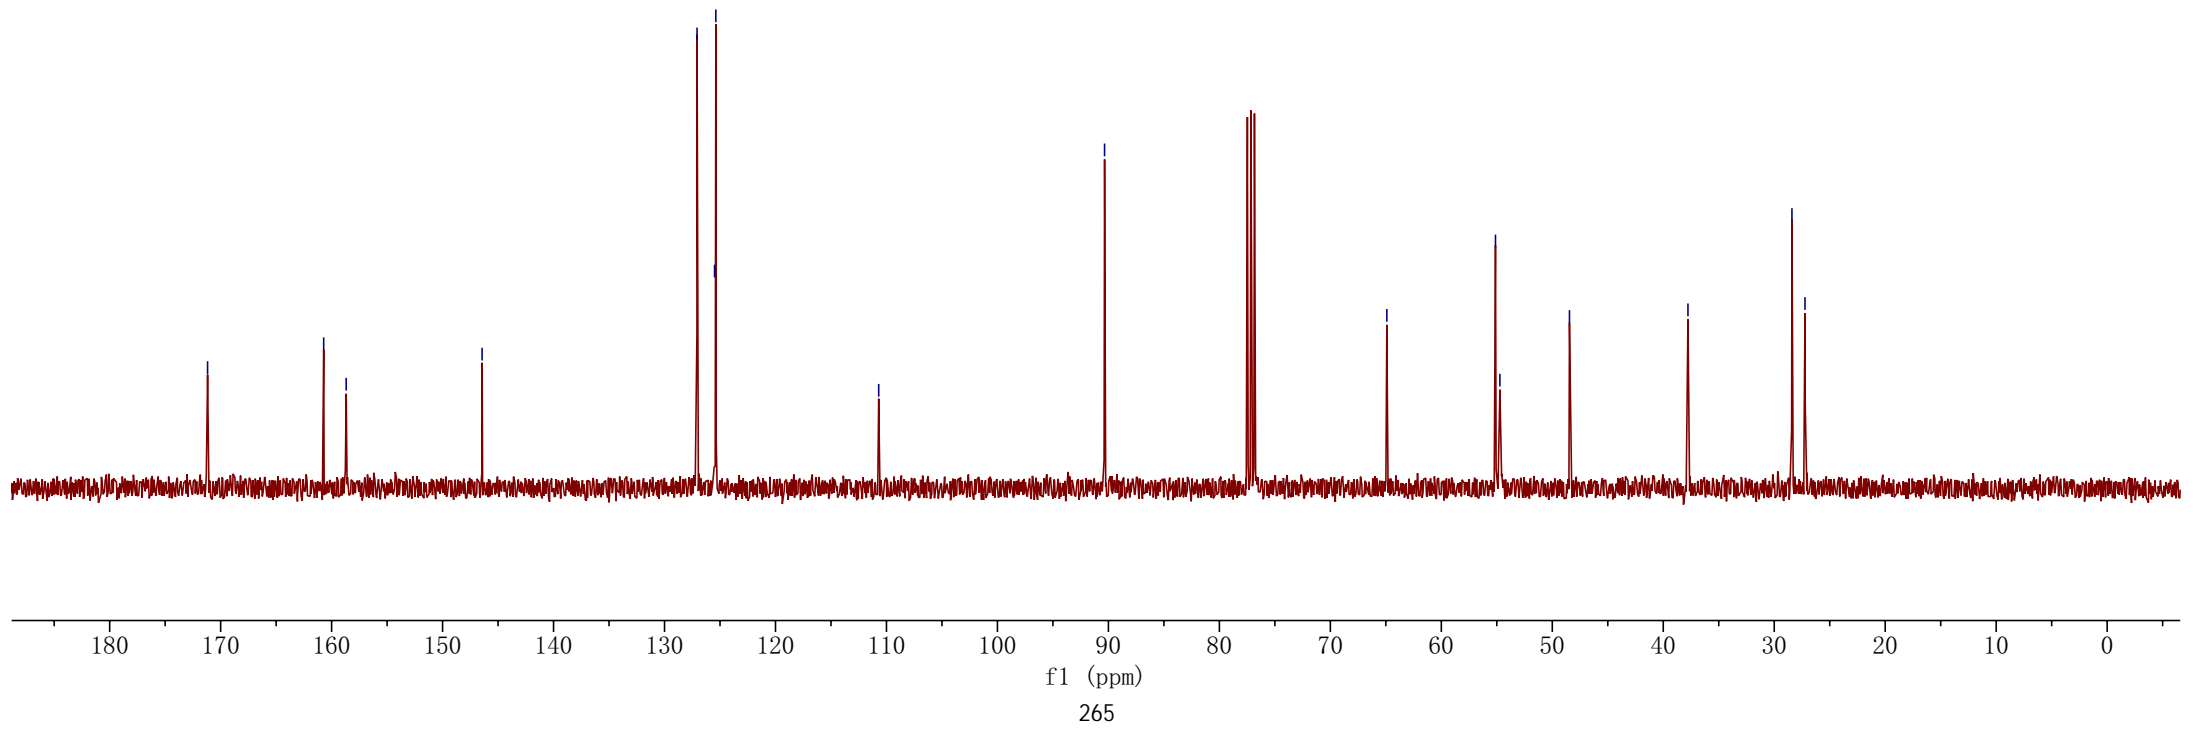

7.55  
7.35  
7.33  
7.25  
7.23  
7.22

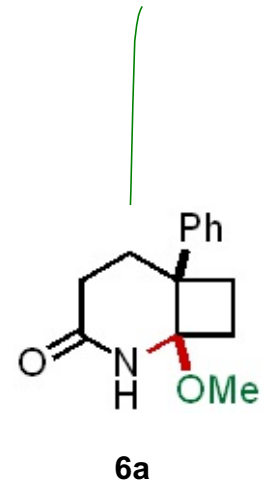

-3.12  
2.51  
2.50  
2.49  
2.47  
2.39  
2.38  
2.36  
2.35  
2.33  
2.27  
2.25  
2.24  
2.23  
2.22  
2.21  
2.17  
2.16  
2.14  
2.13  
2.12

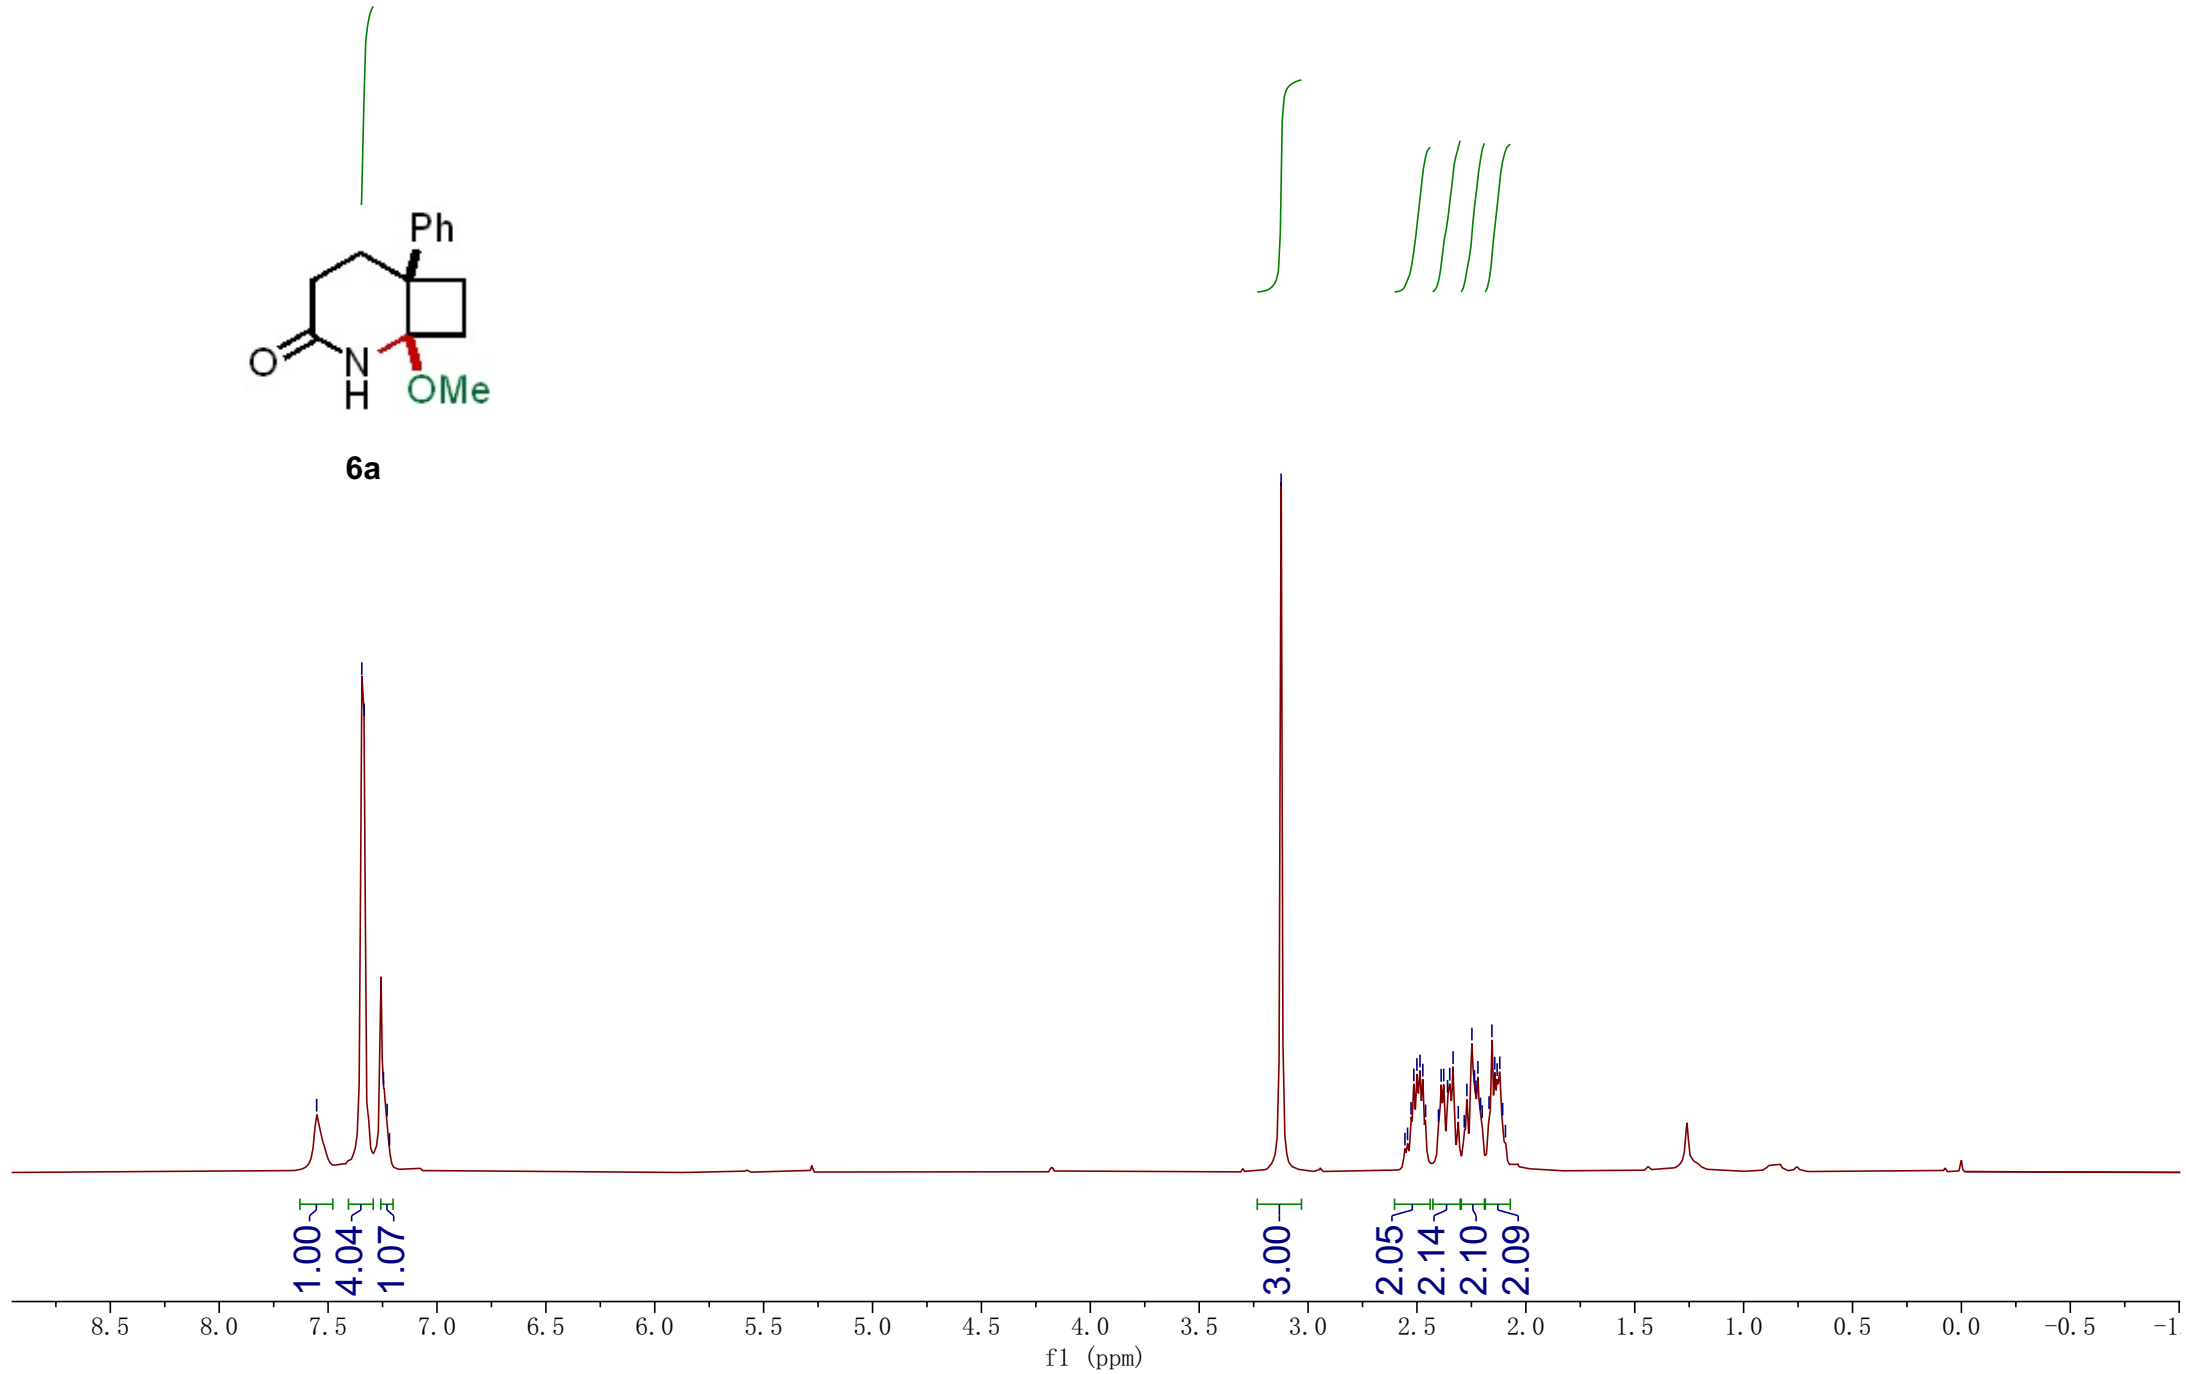

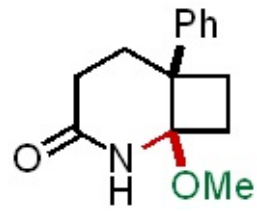

6a

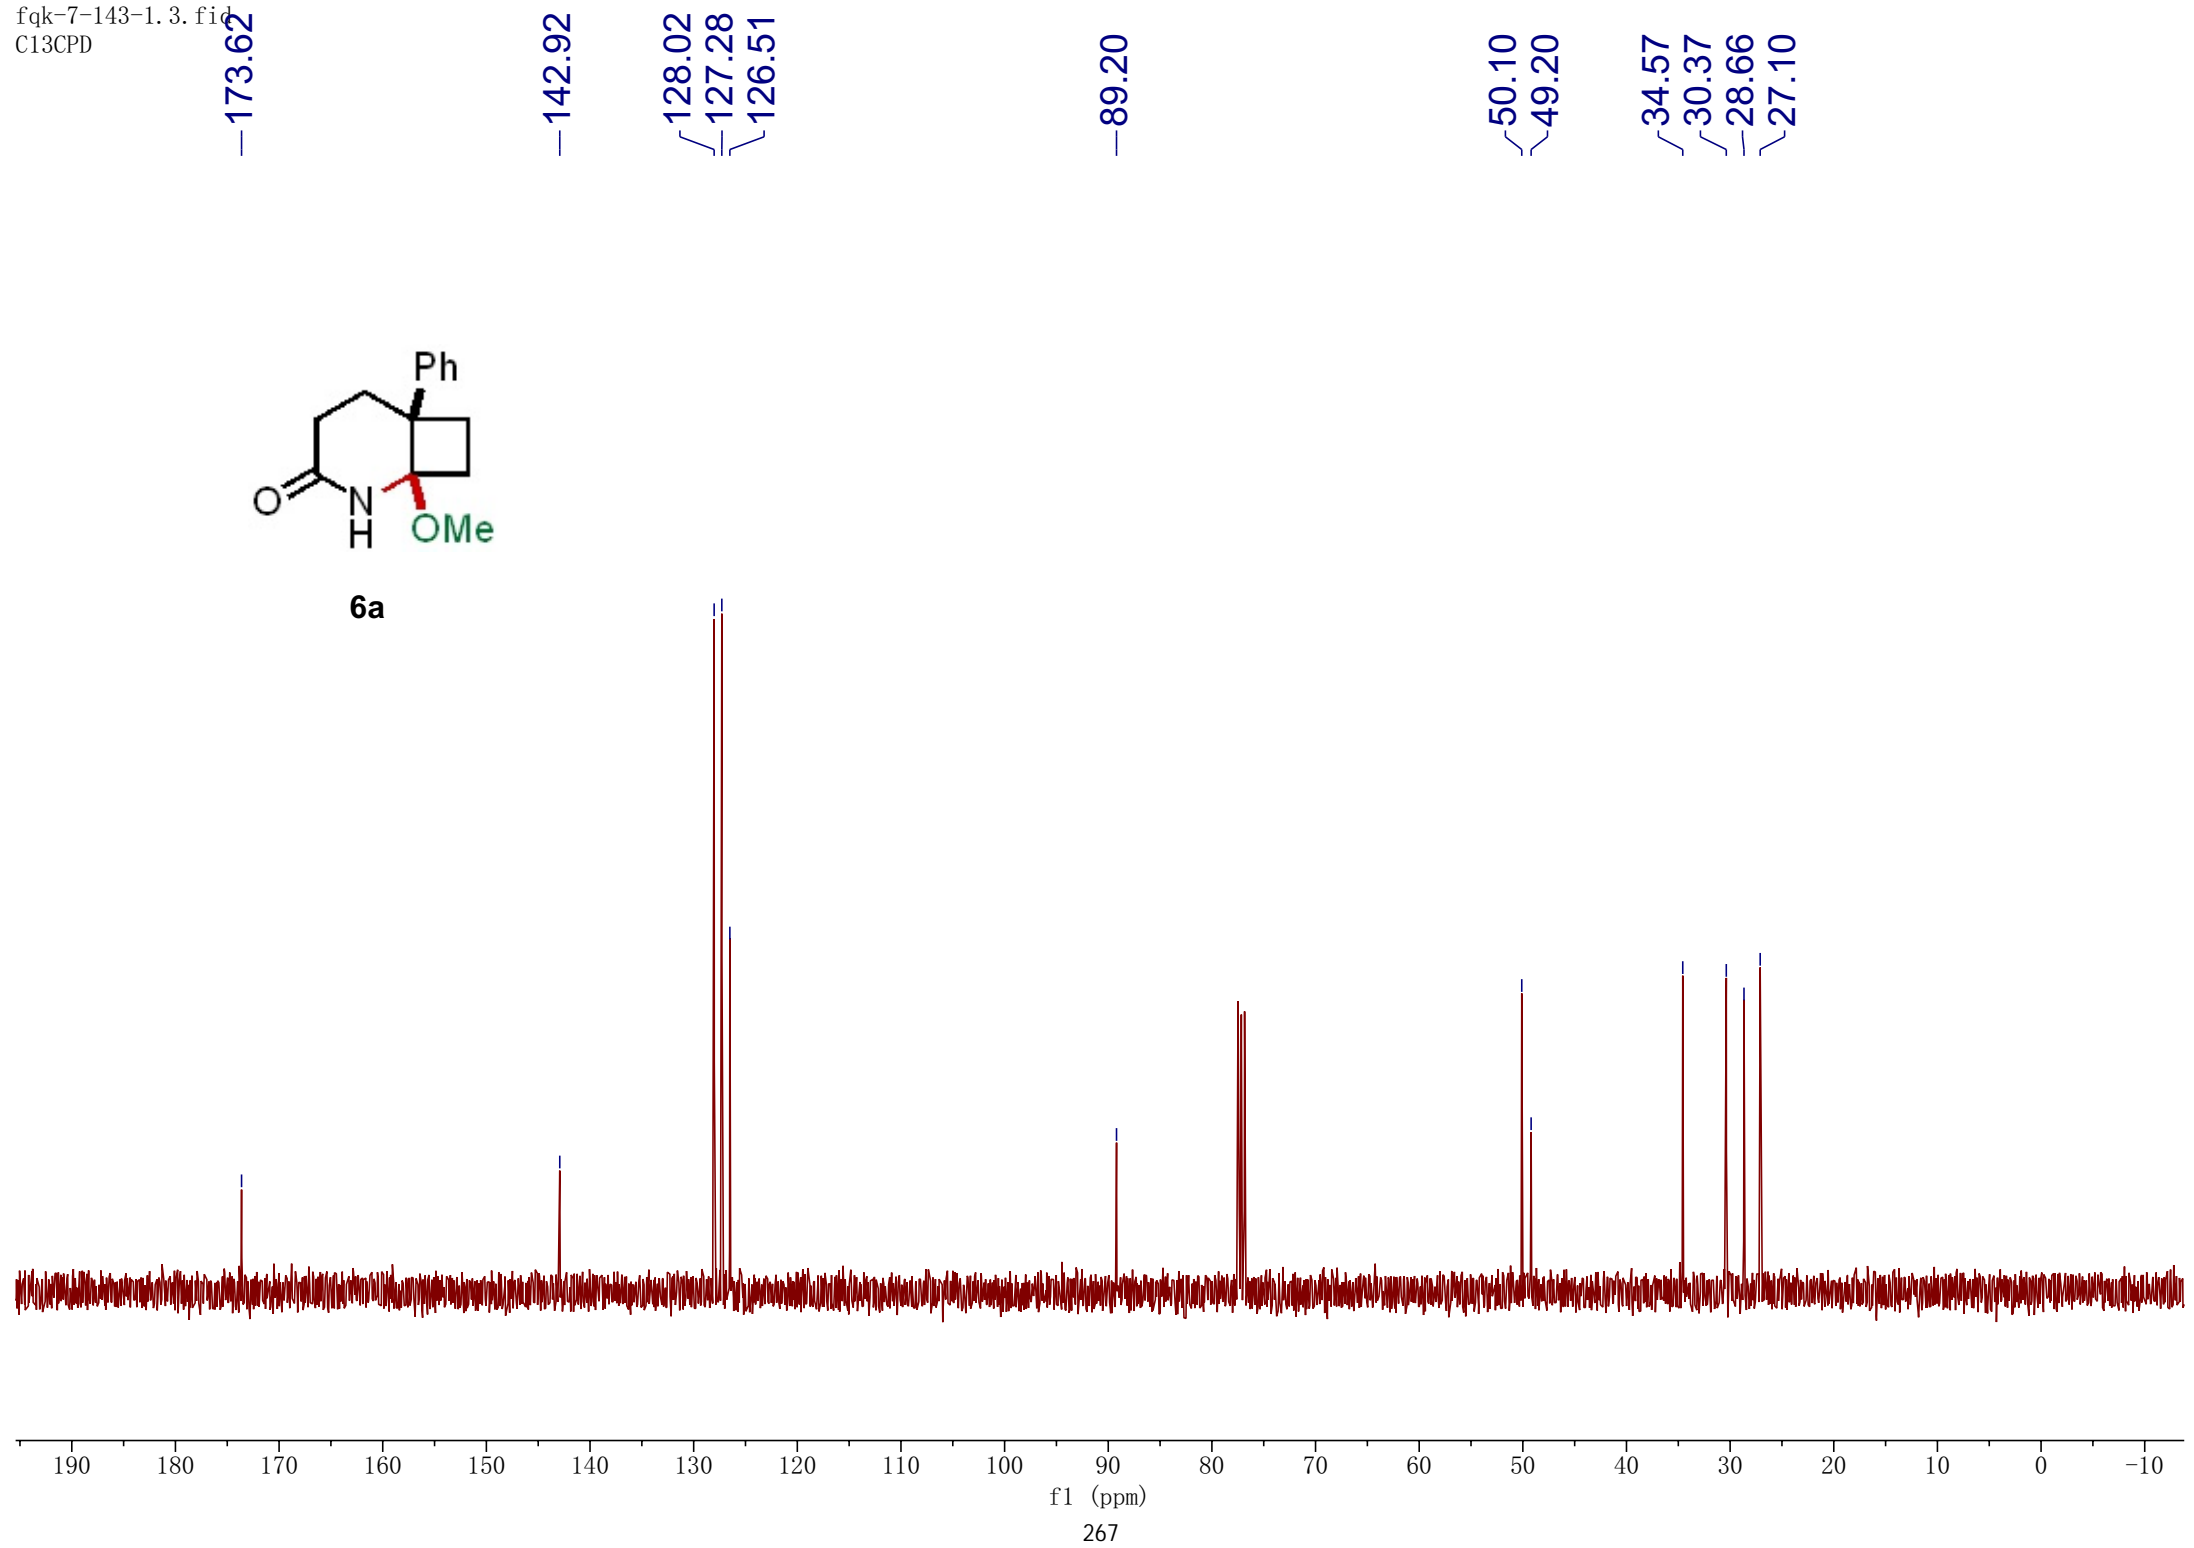

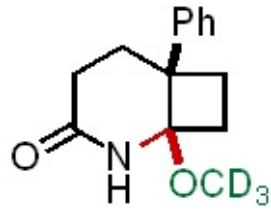

6a-d

7.68  
7.64  
7.60  
7.56  
7.34  
7.33  
7.25  
7.23  
7.22

2.55  
2.54  
2.52  
2.51  
2.50  
2.48  
2.47  
2.46  
2.40  
2.38  
2.37  
2.36  
2.35  
2.33  
2.31  
2.28  
2.27  
2.25  
2.23  
2.22  
2.21  
2.20  
2.16  
2.15  
2.14  
2.13  
2.12  
2.10  
2.09

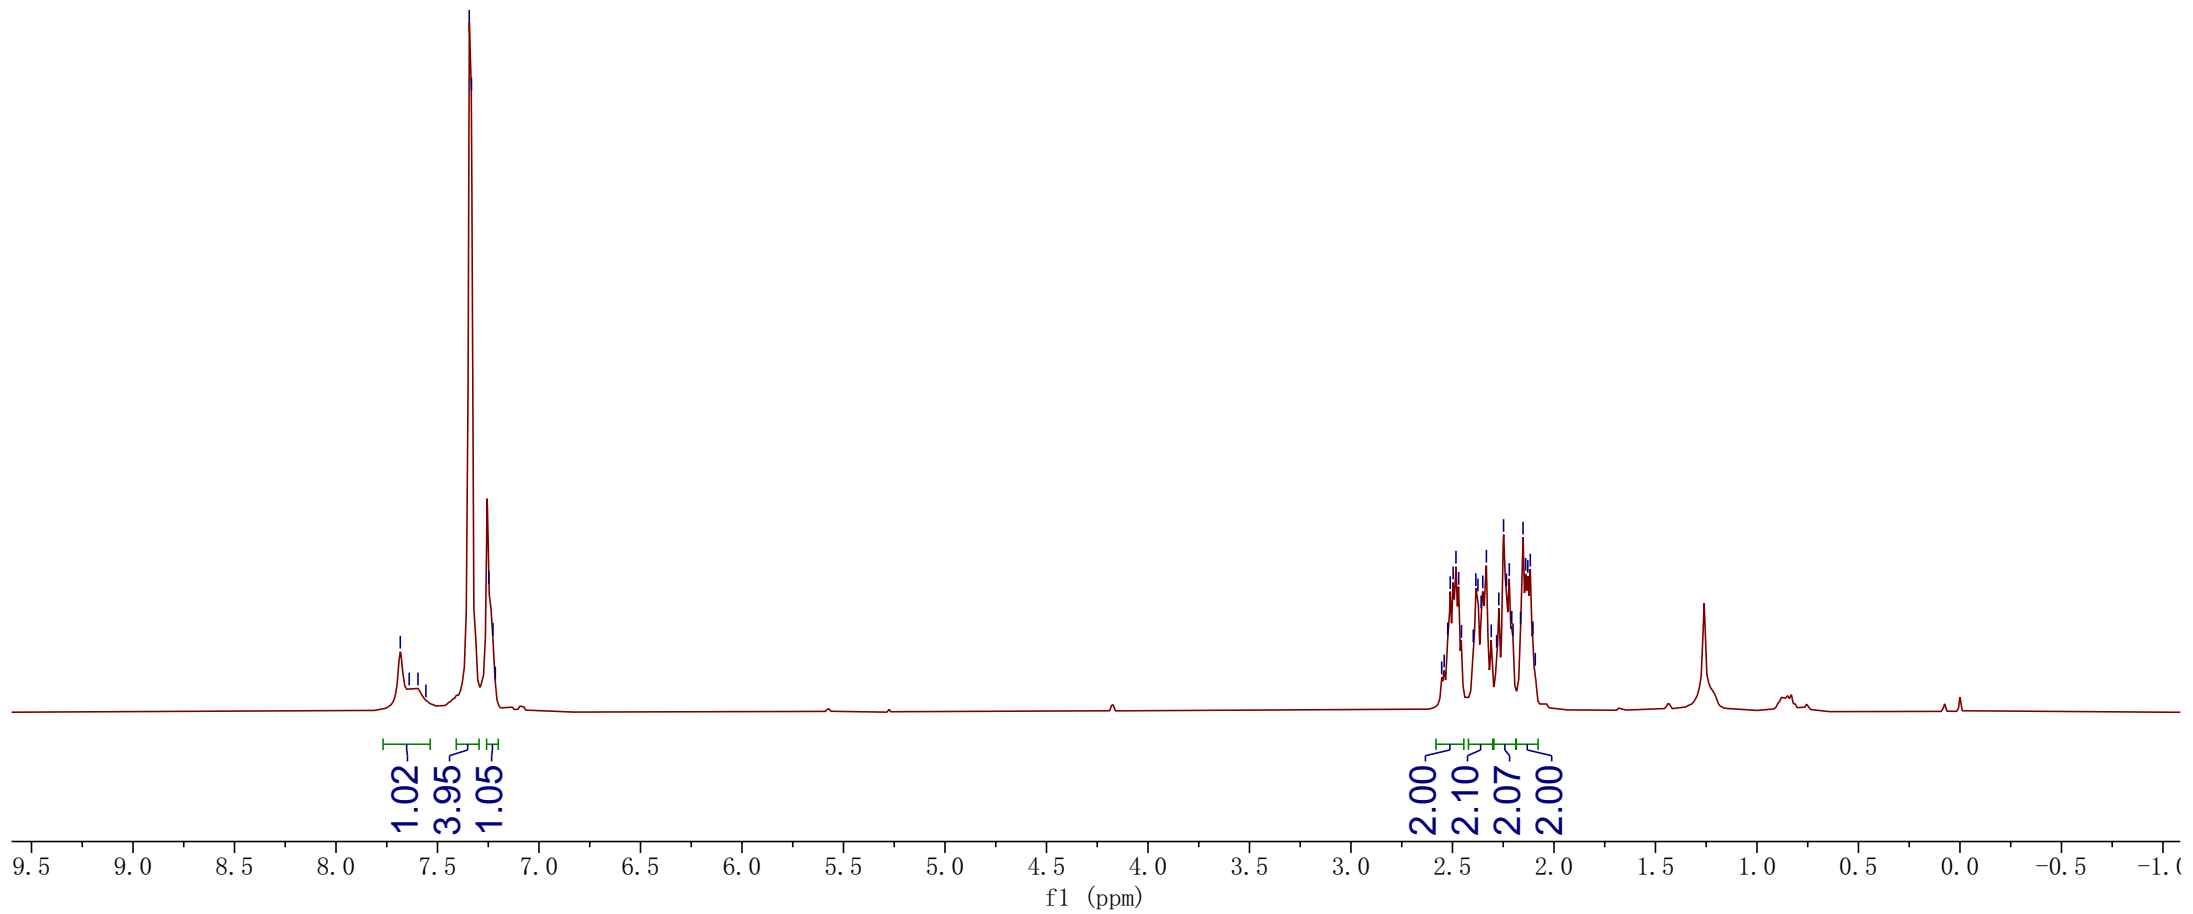

-173.70

-142.93

-128.00

-127.27

-126.48

-89.14

-49.17

-34.58

-30.32

-28.64

-27.09

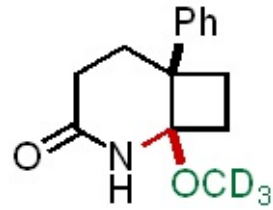

6a-d

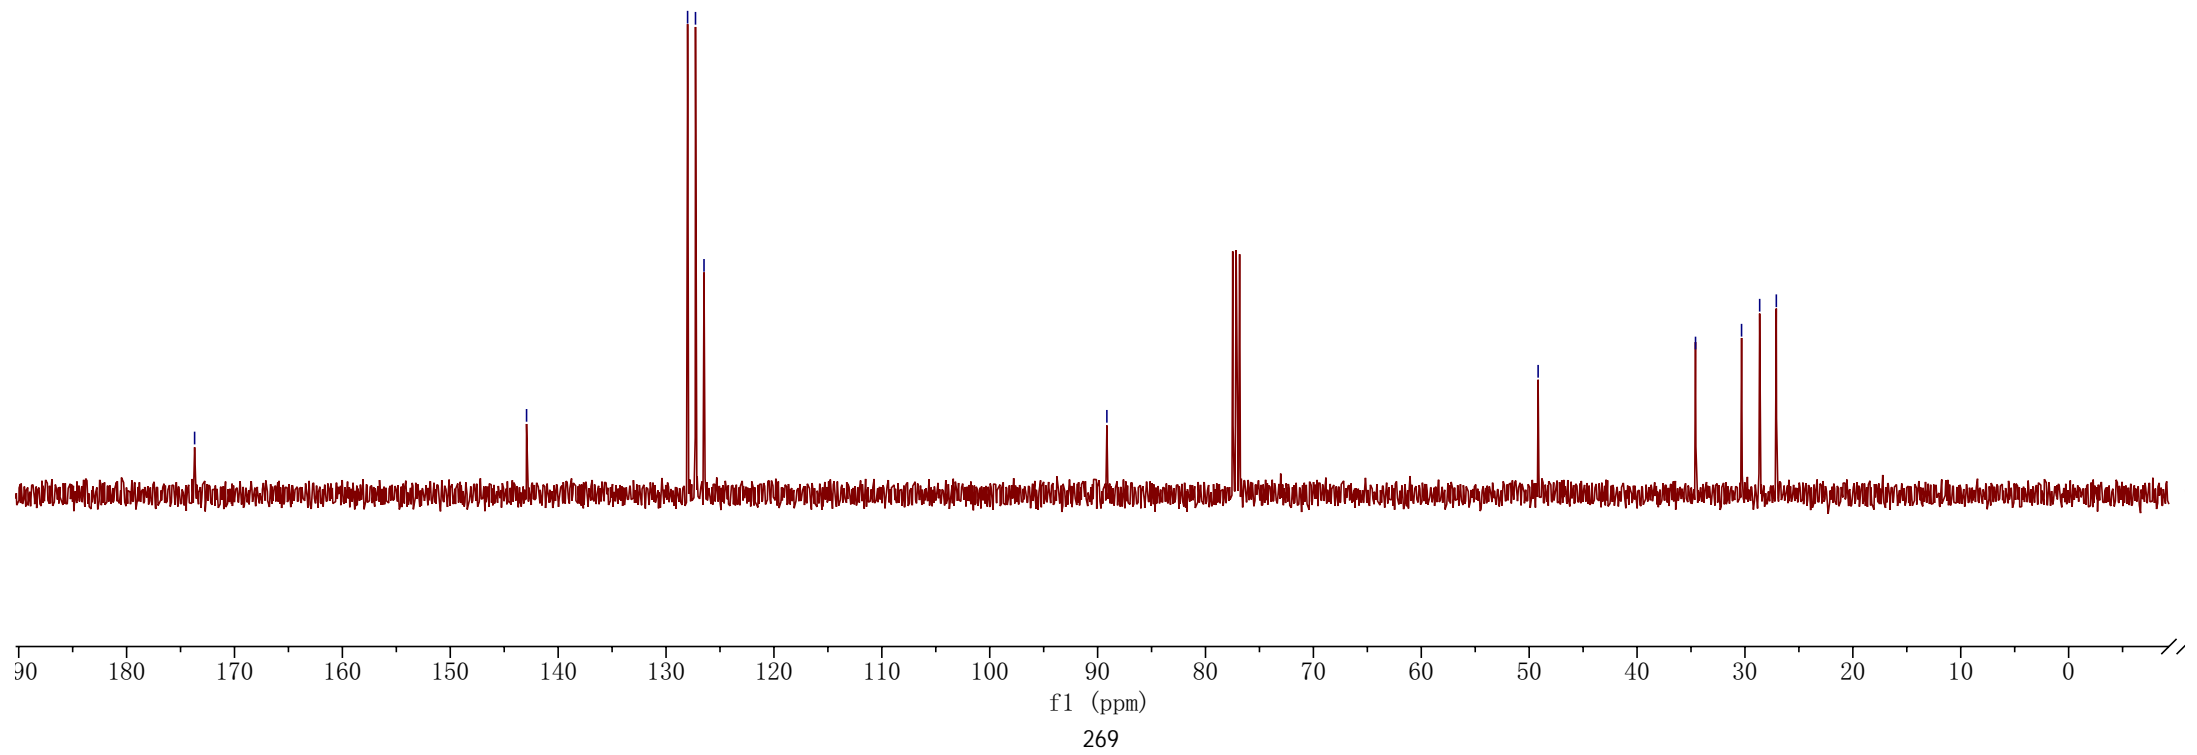

f1-7-135-6-1-f1  
PROTON

7.42 7.41 7.40 7.39 7.35 7.33 7.31 7.27 7.26 7.25 7.25 7.24 7.23 3.33 3.32 3.31 3.29 3.25 3.23 3.23 2.52 2.51 2.51 2.50 2.50 2.49 2.48 2.47 2.47 2.42 2.41 2.32 2.30 2.29 2.29 2.28 2.27 2.27 2.24 2.20 2.19 2.19 2.17 2.14 2.12 2.12 2.11 2.10 -0.95 -0.94 0.92

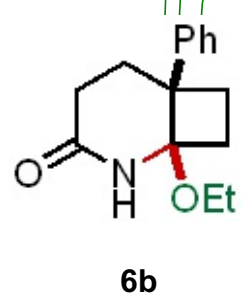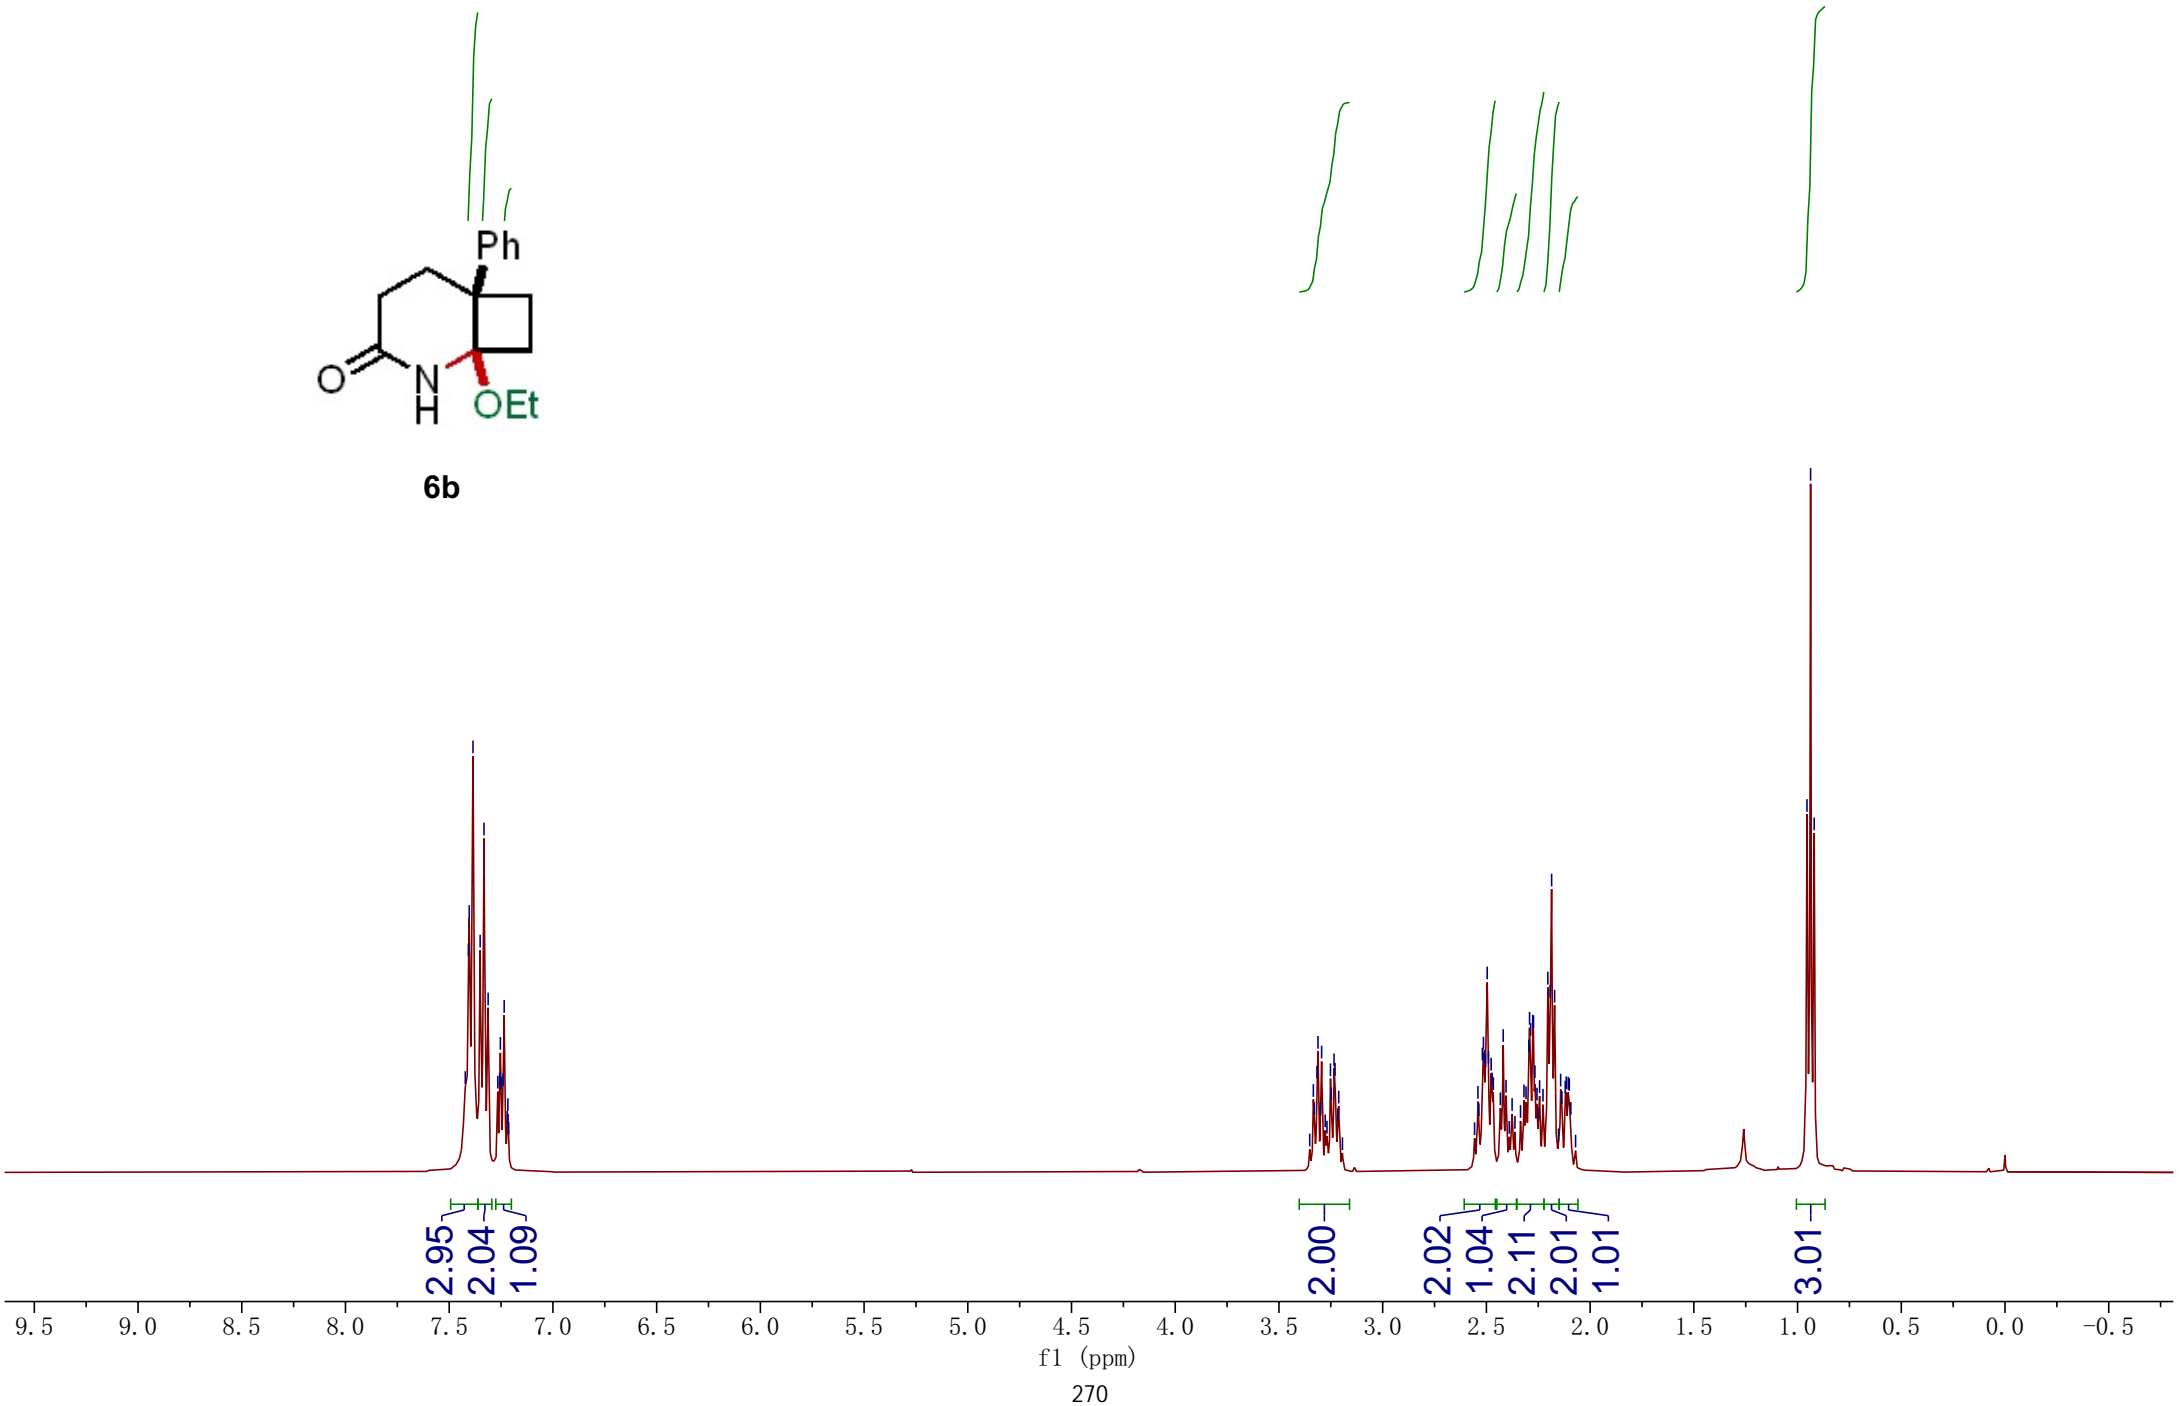

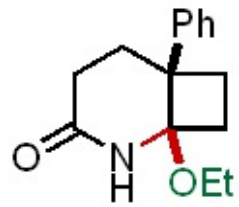

6b

—173.48

—142.97

127.84

127.31

126.35

—88.82

—58.26

—49.25

33.63

31.77

28.70

26.65

—15.25

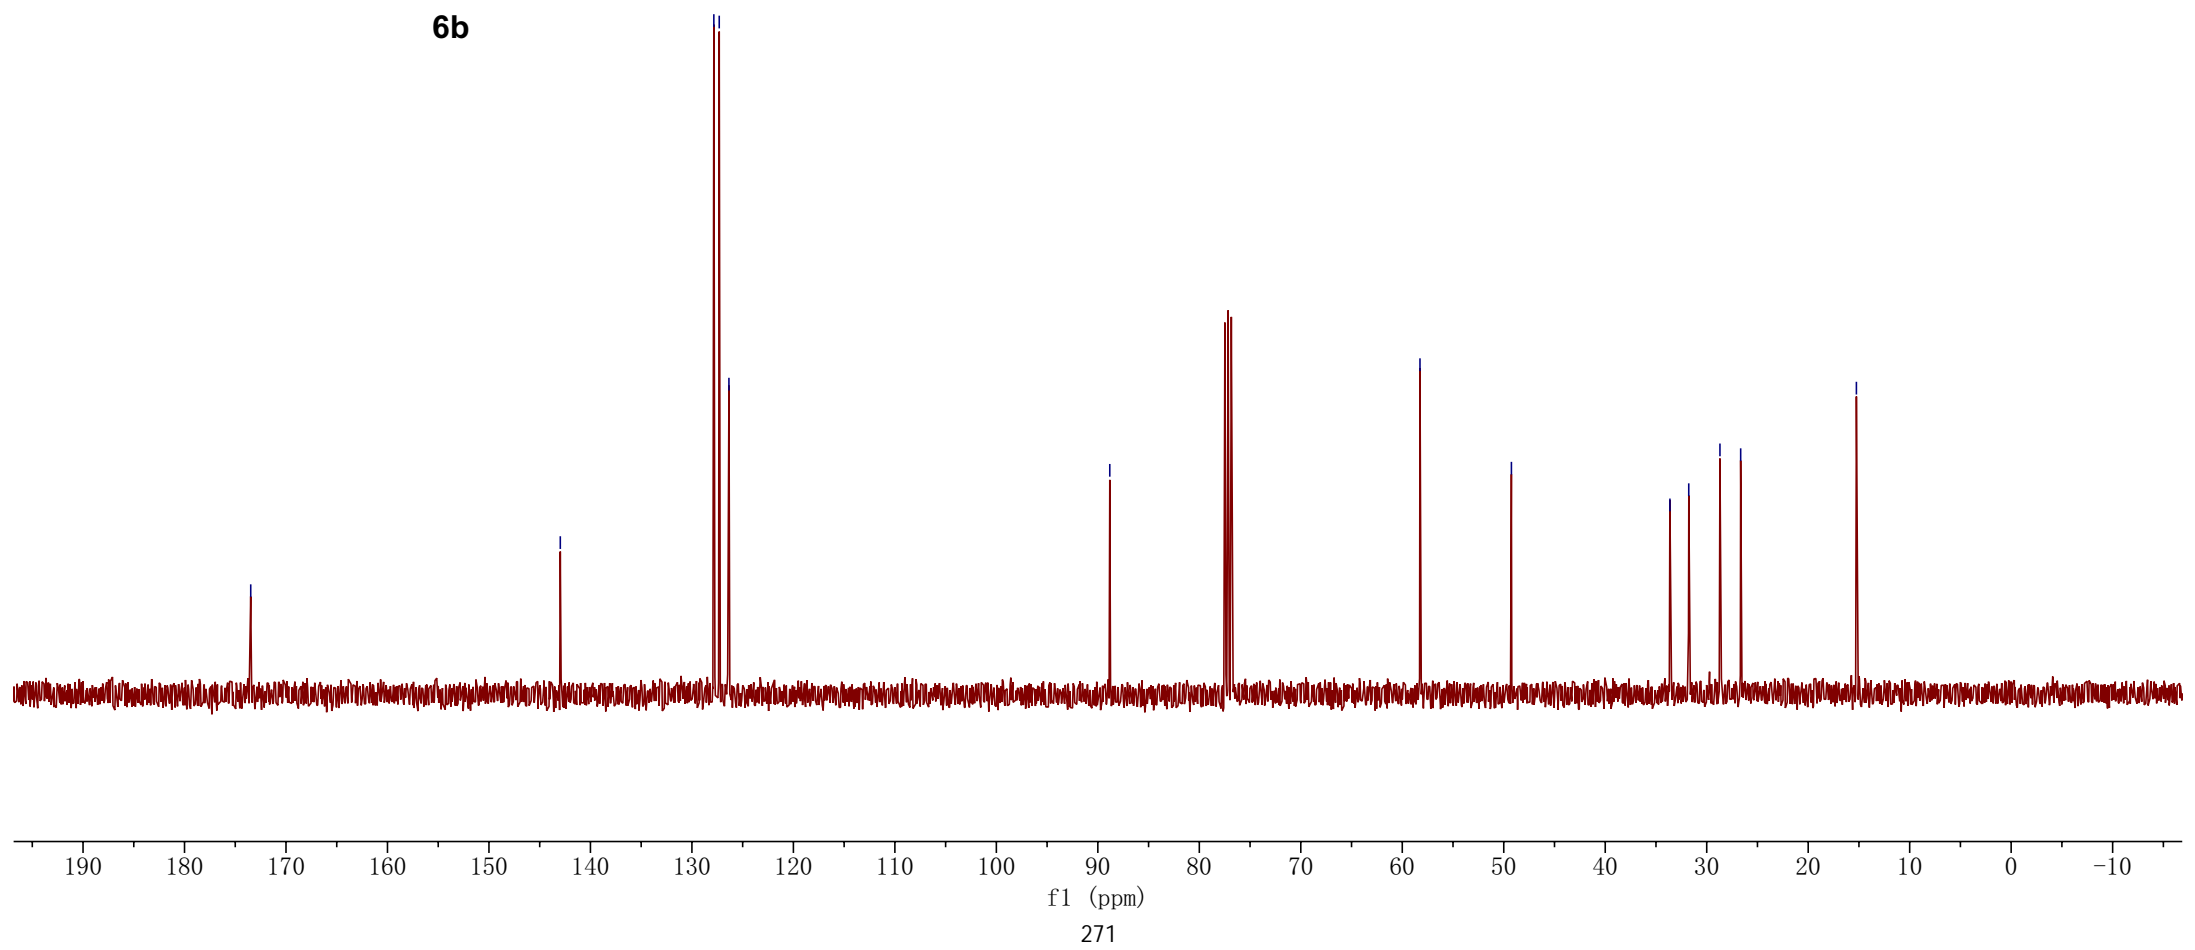

f4-7-139-3-1.fid  
POTON

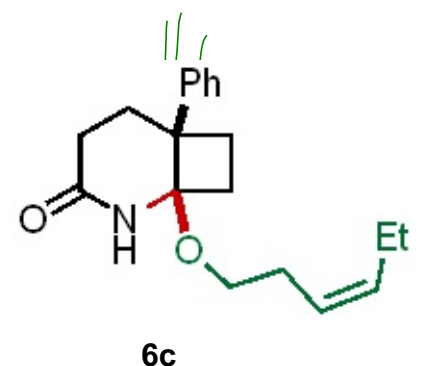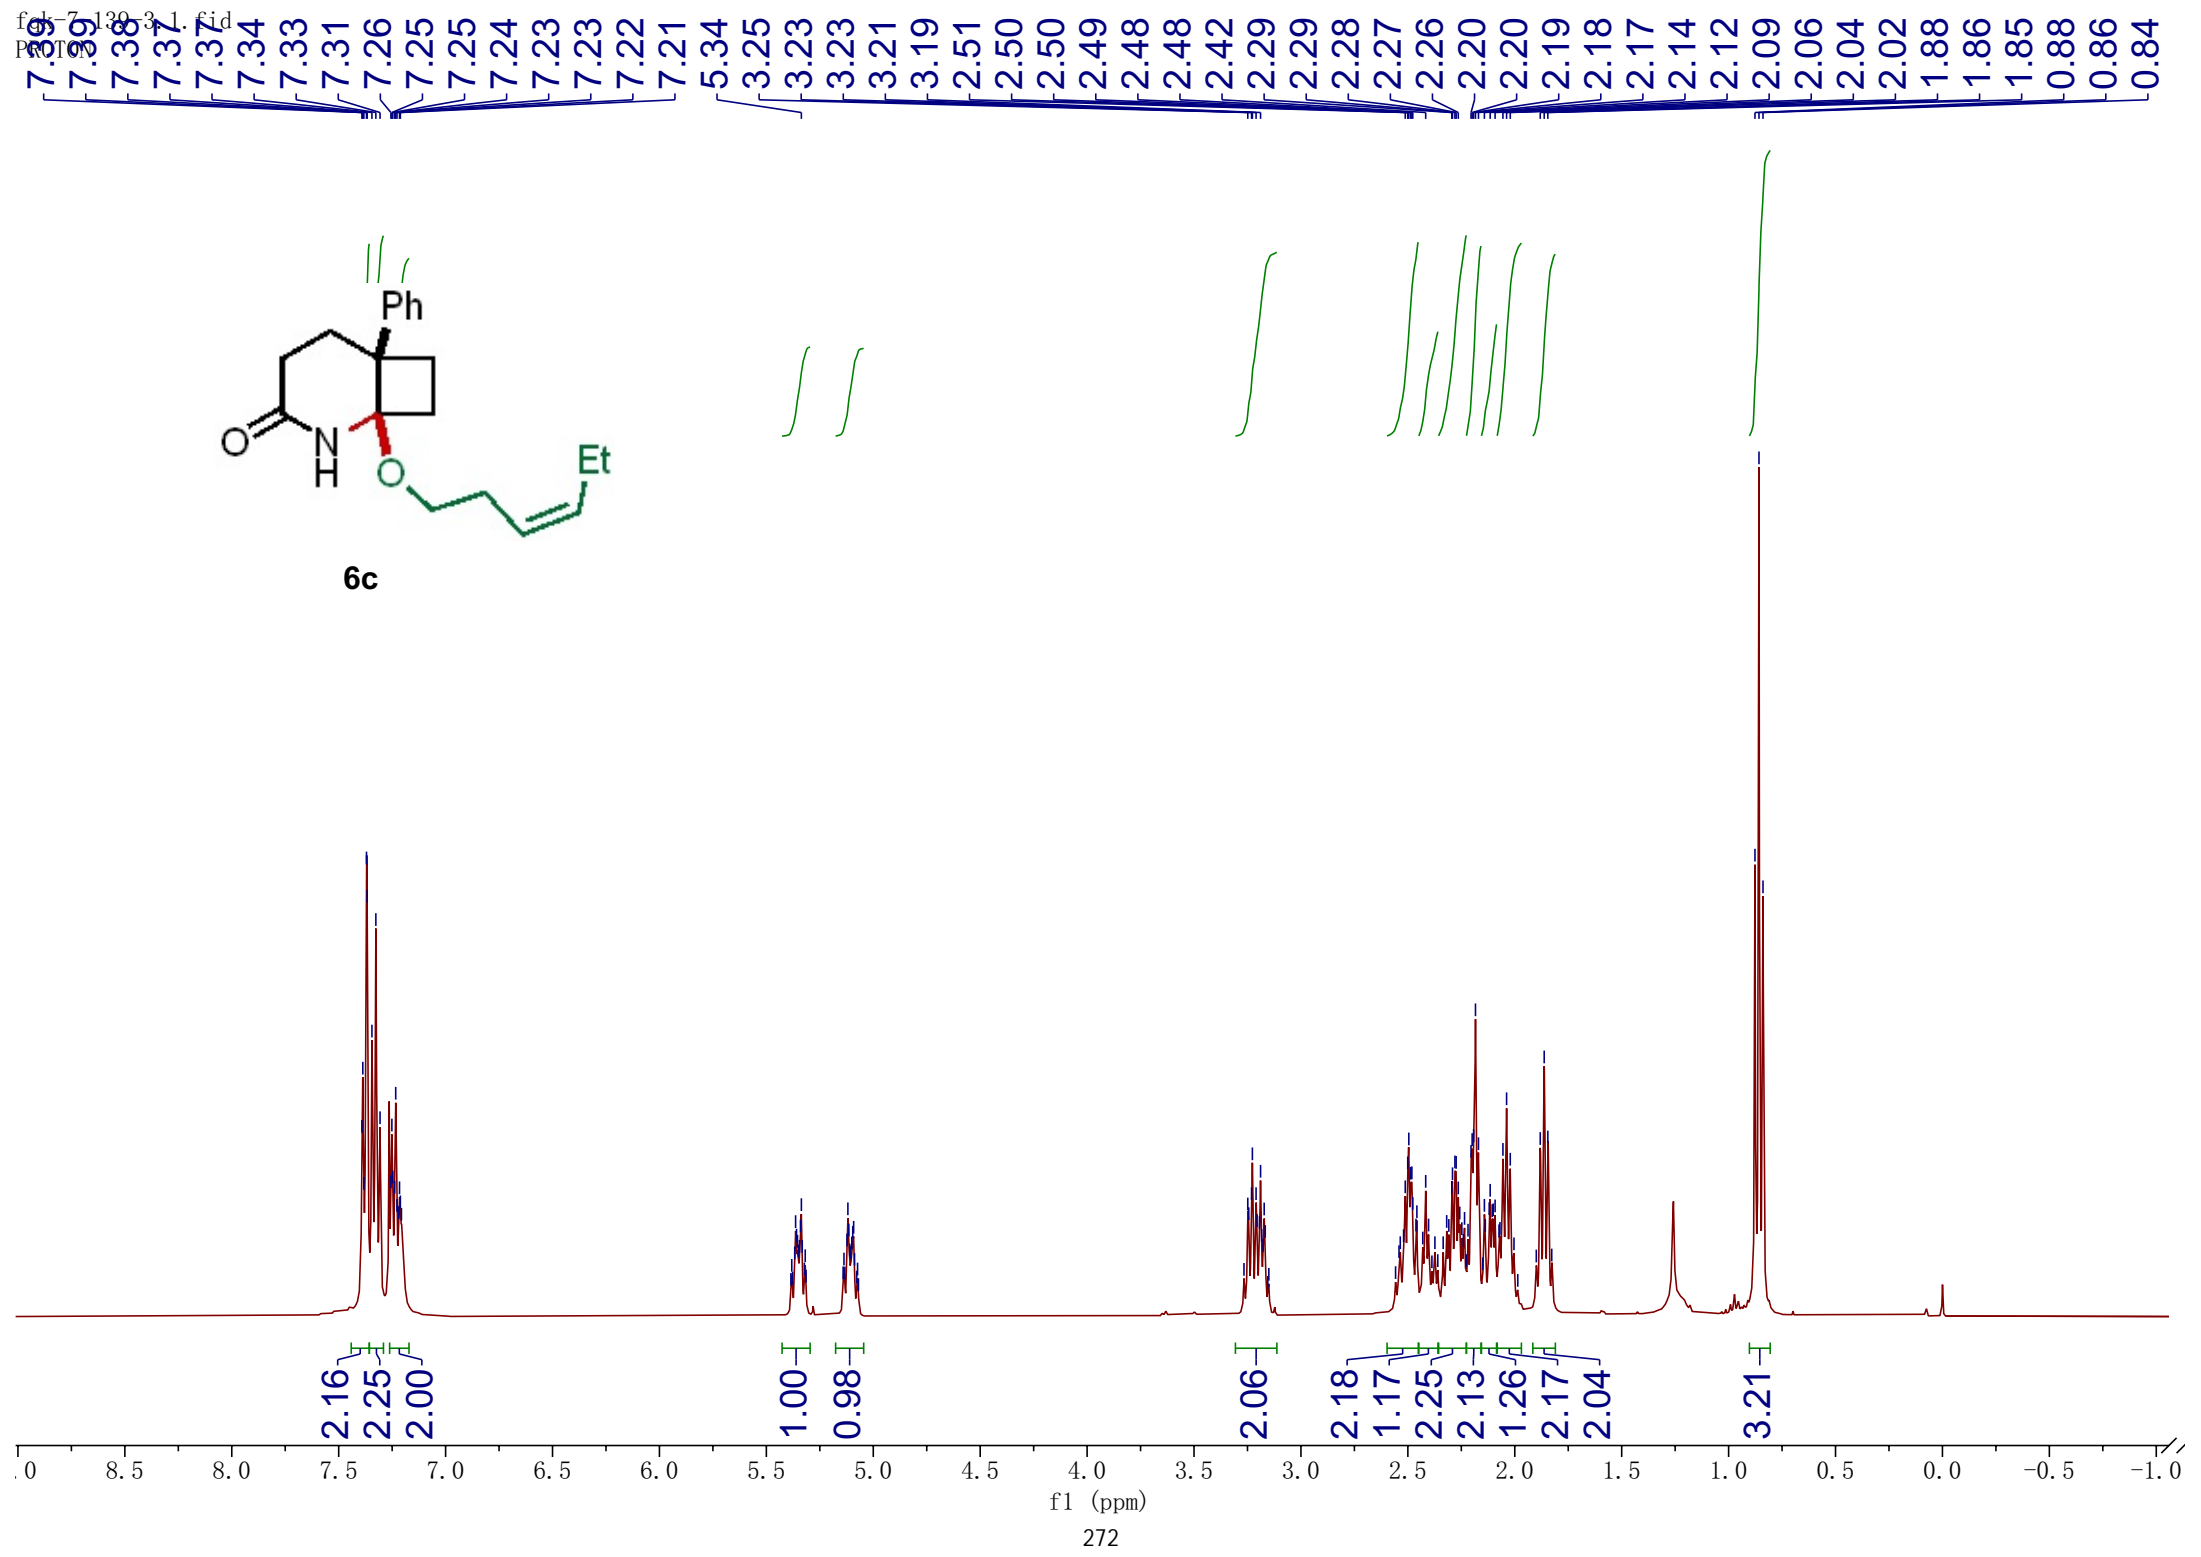

-173.41  
-142.91  
133.81  
127.87  
127.36  
126.39  
124.60

-88.80

-62.40

-49.34

33.71  
31.74  
28.74  
27.76  
26.68  
20.51  
14.30

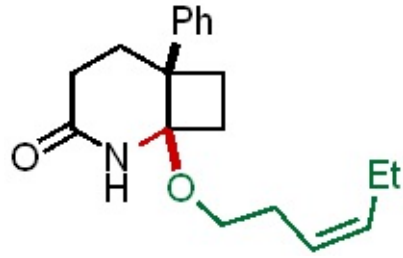

6c

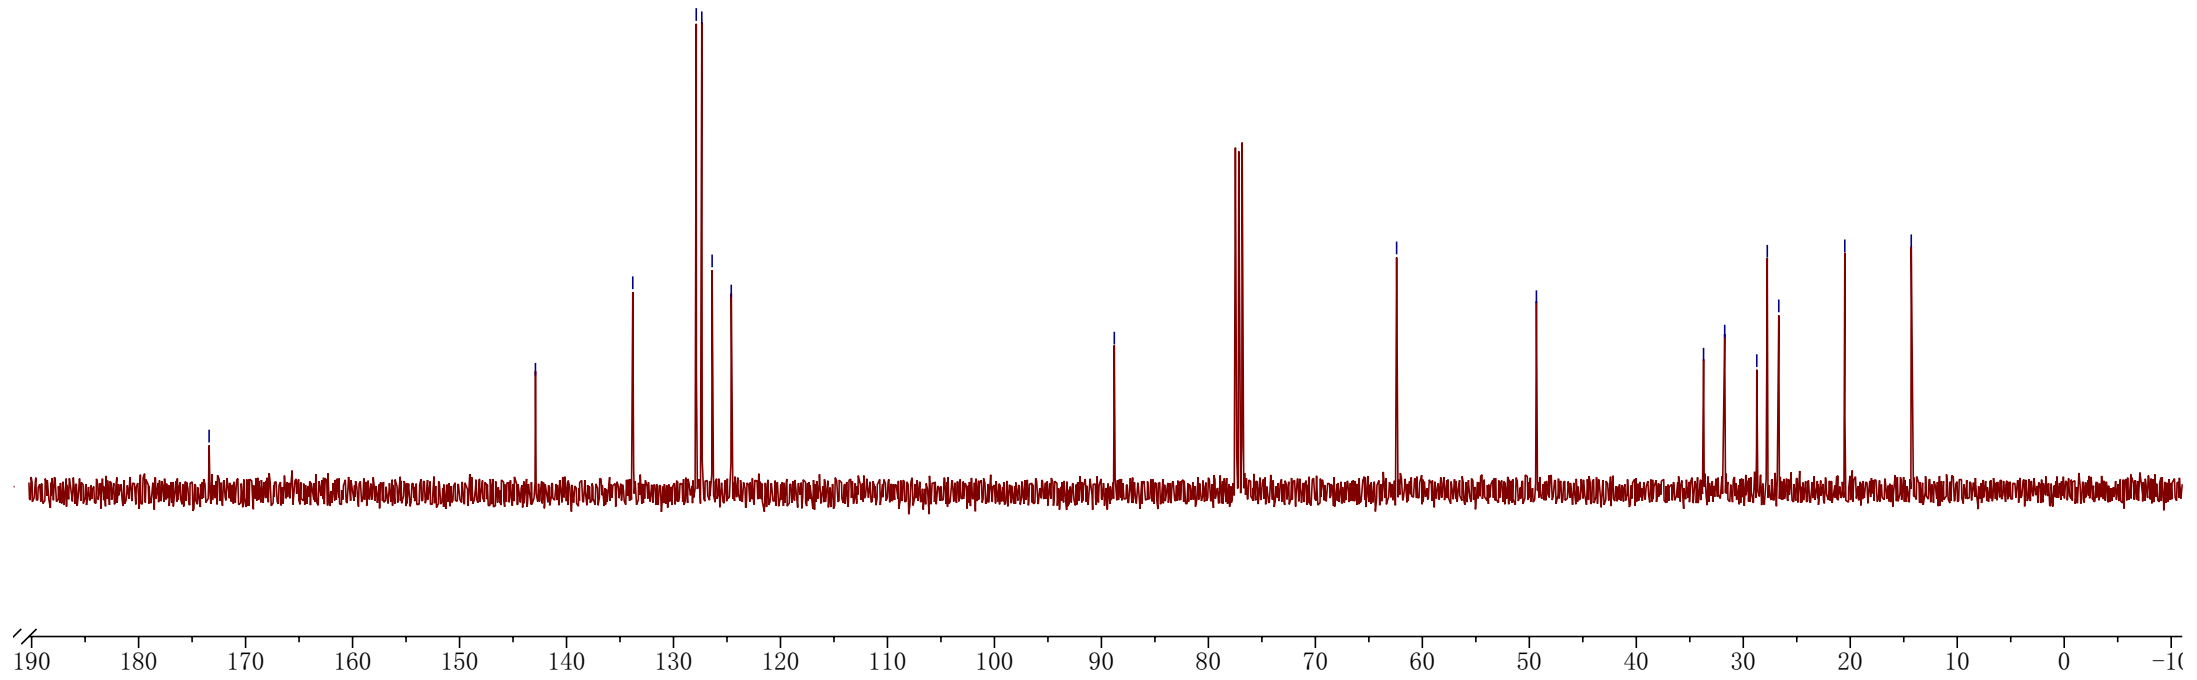

f1 (ppm)

273

f1  
PR100

7.39  
7.37  
7.30  
7.29  
7.28  
7.27  
7.16  
7.05  
7.03  
6.66  
6.64  
2.68  
2.68  
2.67  
2.65  
2.64  
2.57  
2.56  
2.54  
2.53  
2.52  
2.51  
2.50  
2.48  
2.45  
2.43  
2.43  
2.42  
2.41  
2.41  
2.40  
2.40  
2.38  
2.37  
2.37  
2.35  
2.34  
2.33  
2.31  
2.29  
2.27  
2.22  
2.21  
2.20  
2.19  
2.19  
2.18  
2.18  
2.17  
2.17  
2.14

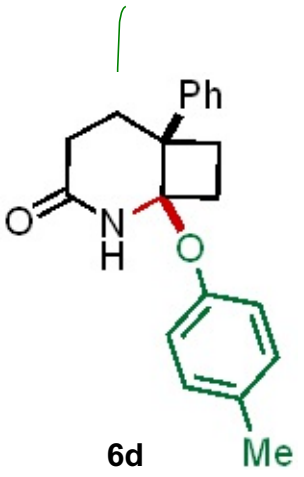

Handwritten green annotations on the spectrum, including a vertical line at approximately 2.35 ppm and several curved lines connecting peaks in the 2.1-2.4 ppm region.

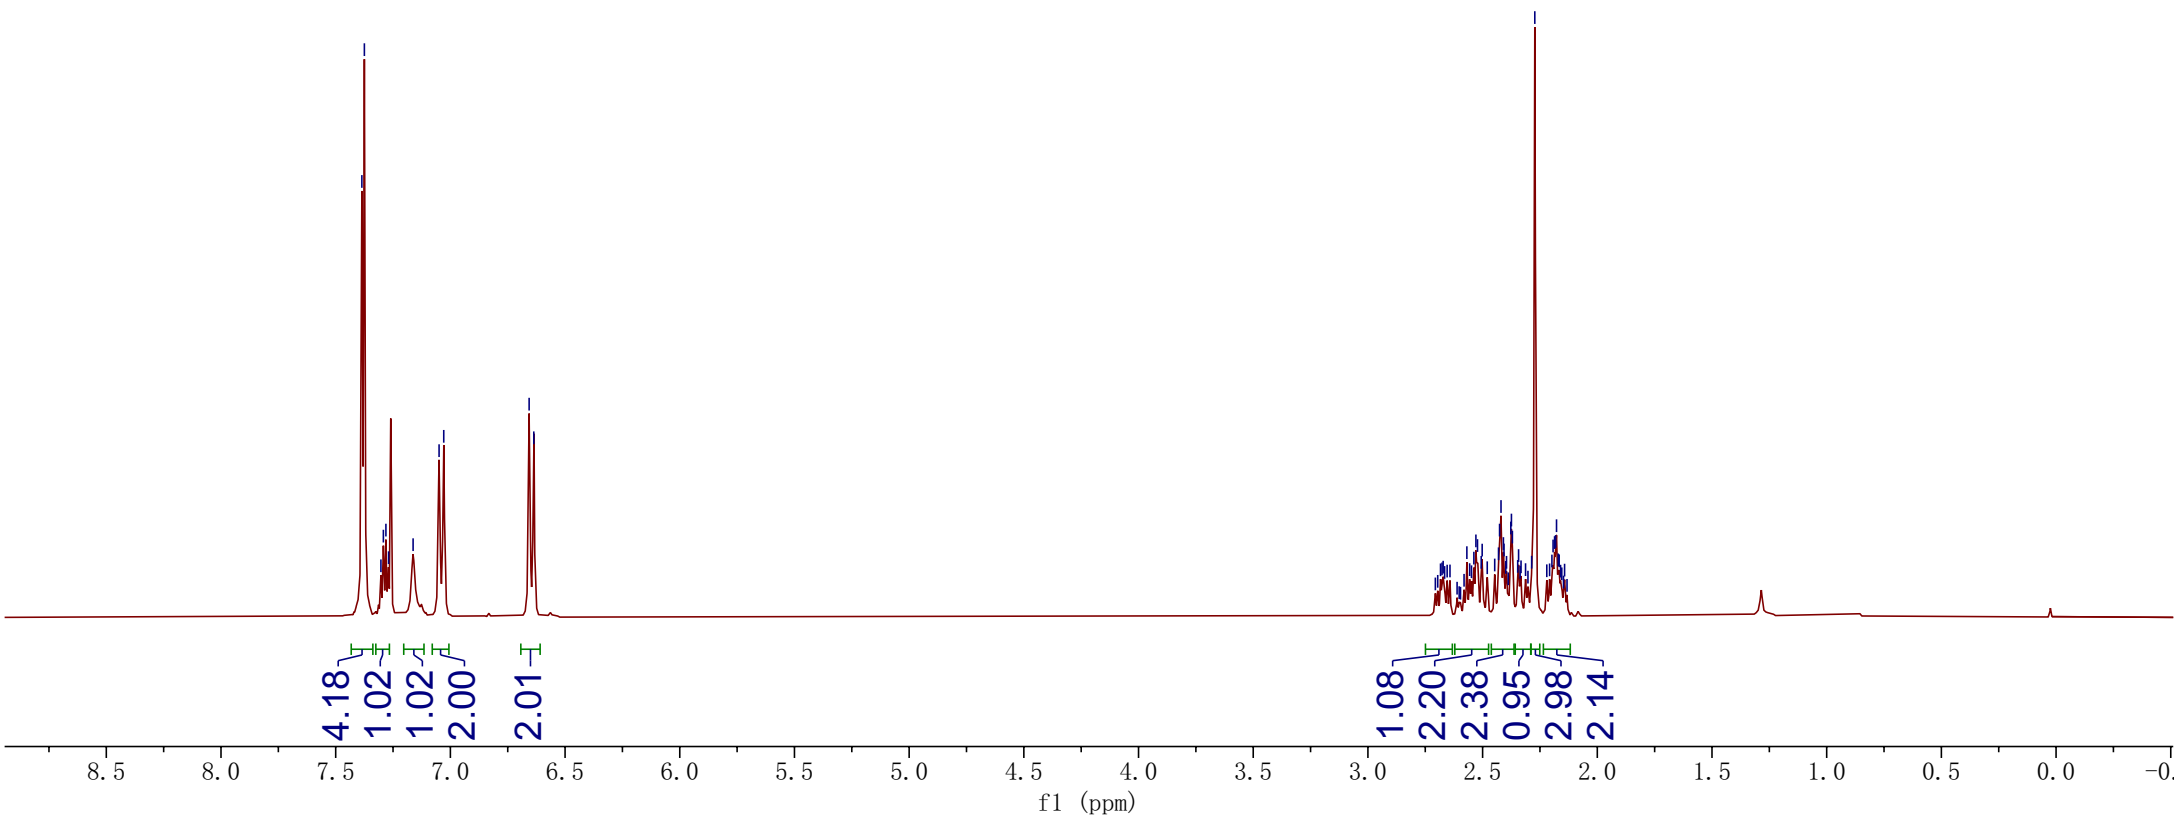

f1 (ppm)

274

—172.66

—150.92

—142.66

132.26

130.12

127.92

127.36

126.44

119.09

—89.29

—50.02

~35.47

~31.60

~28.54

~27.17

~20.58

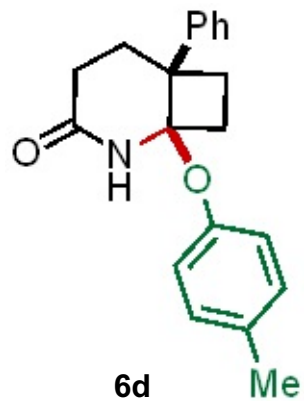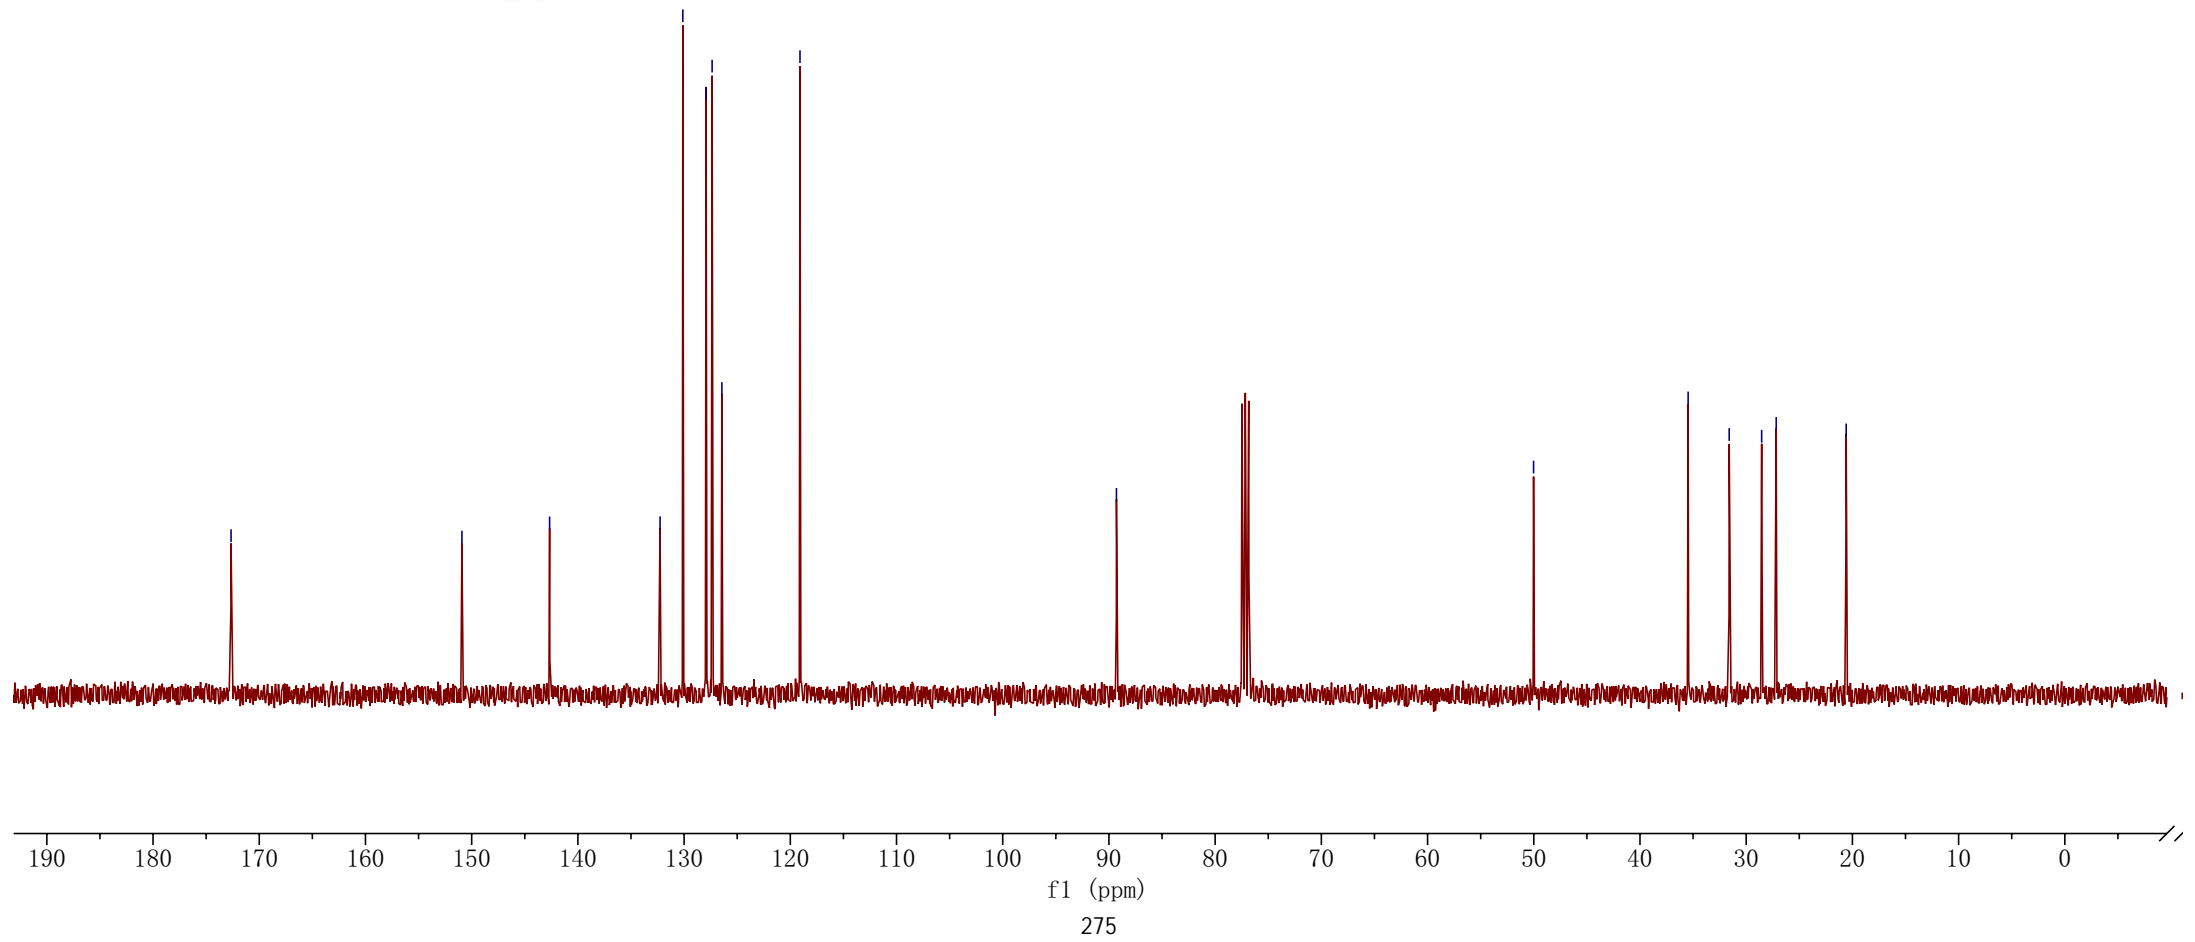

fqk-7-106-3-1 f1  
1110-DY  
0

7.92 7.90 7.71 7.39 7.37 7.35 7.35 7.33 7.29 7.29 7.27 6.72 6.70 3.86 2.67 2.66 2.66 2.65 2.64 2.62 2.61 2.60 2.58 2.57 2.56 2.56 2.54 2.54 2.52 2.50 2.50 2.44 2.43 2.42 2.39 2.38 2.36 2.33 2.32 2.30 2.29 2.23 2.22 2.21 2.20 2.19 2.18 2.17

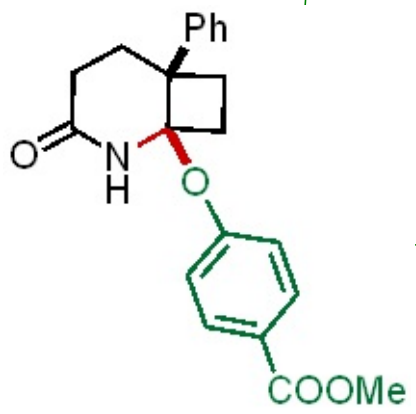

6e

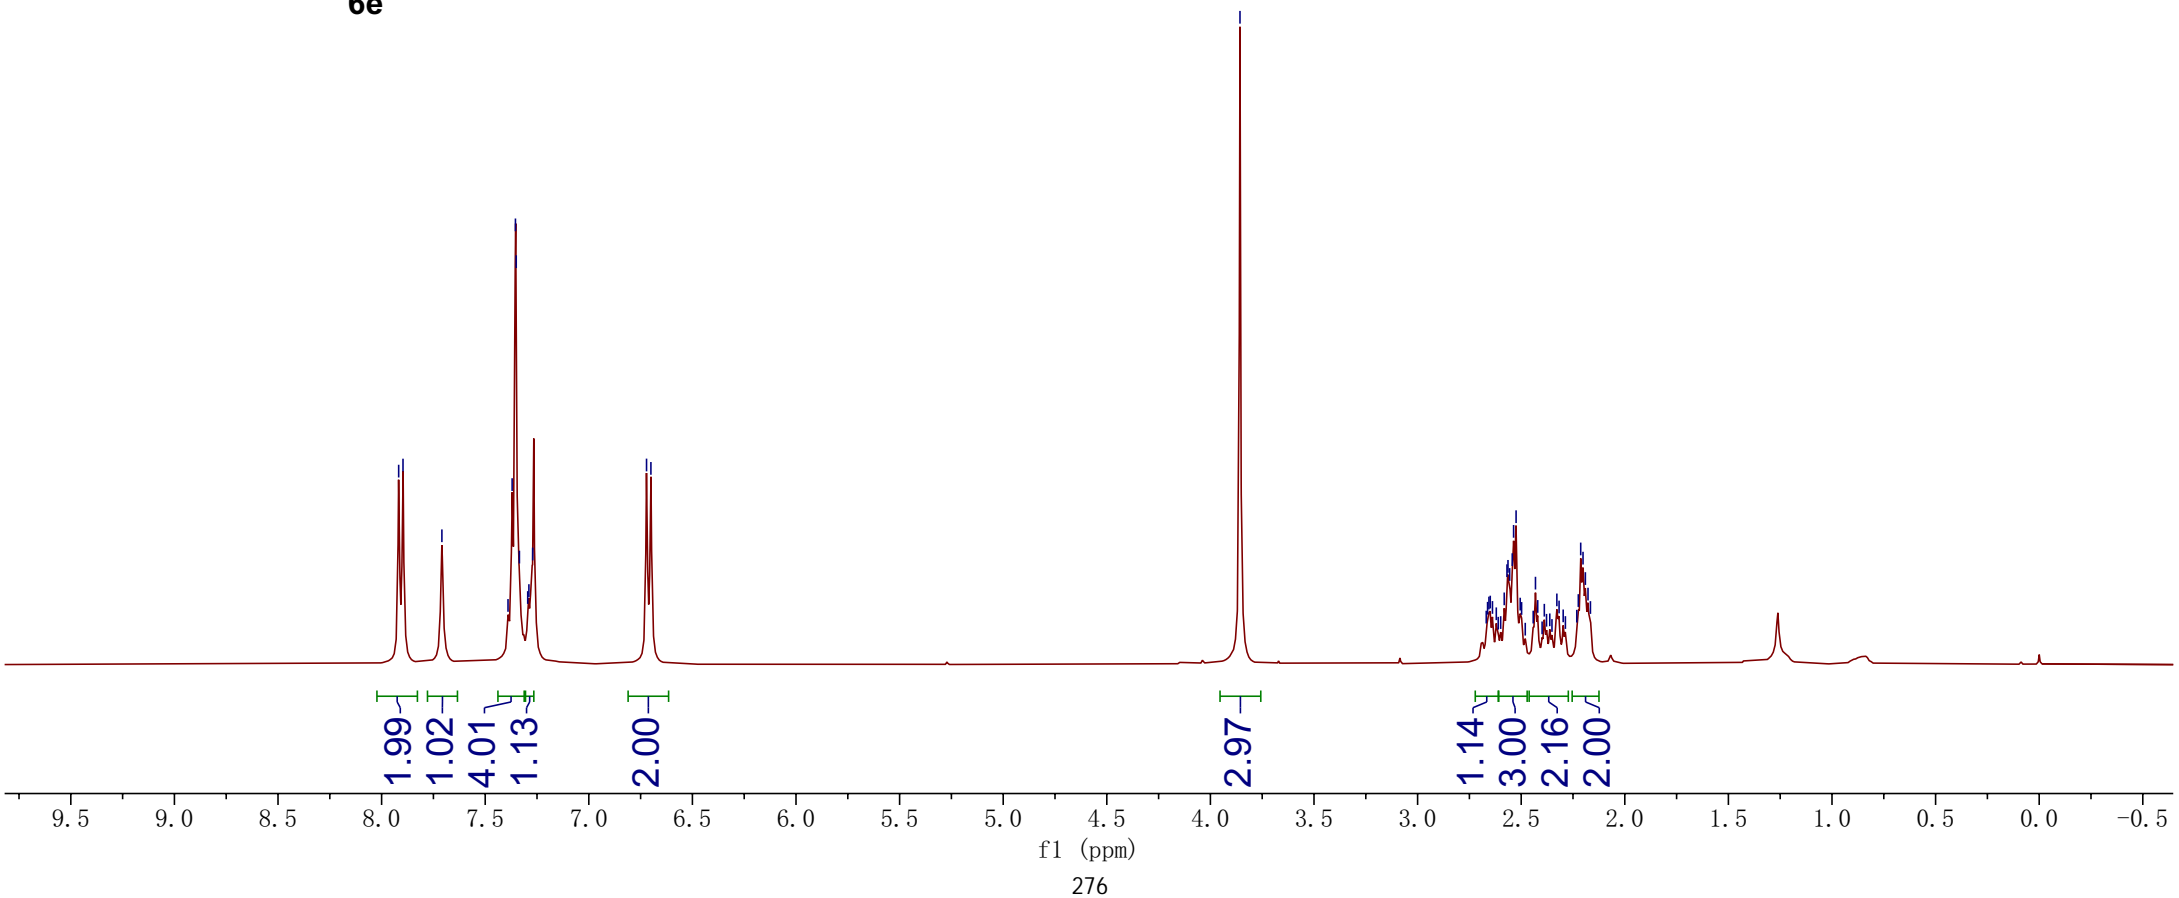

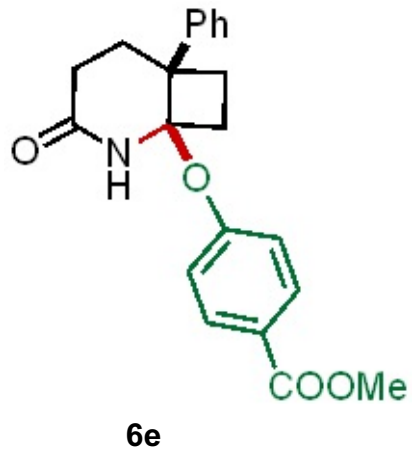

—173.22  
—166.53  
—157.29  
  
—142.22  
131.52  
128.01  
127.24  
126.61  
124.00  
117.58

—89.36

~51.98  
~50.10

~35.42  
~31.90  
~28.67  
~27.44

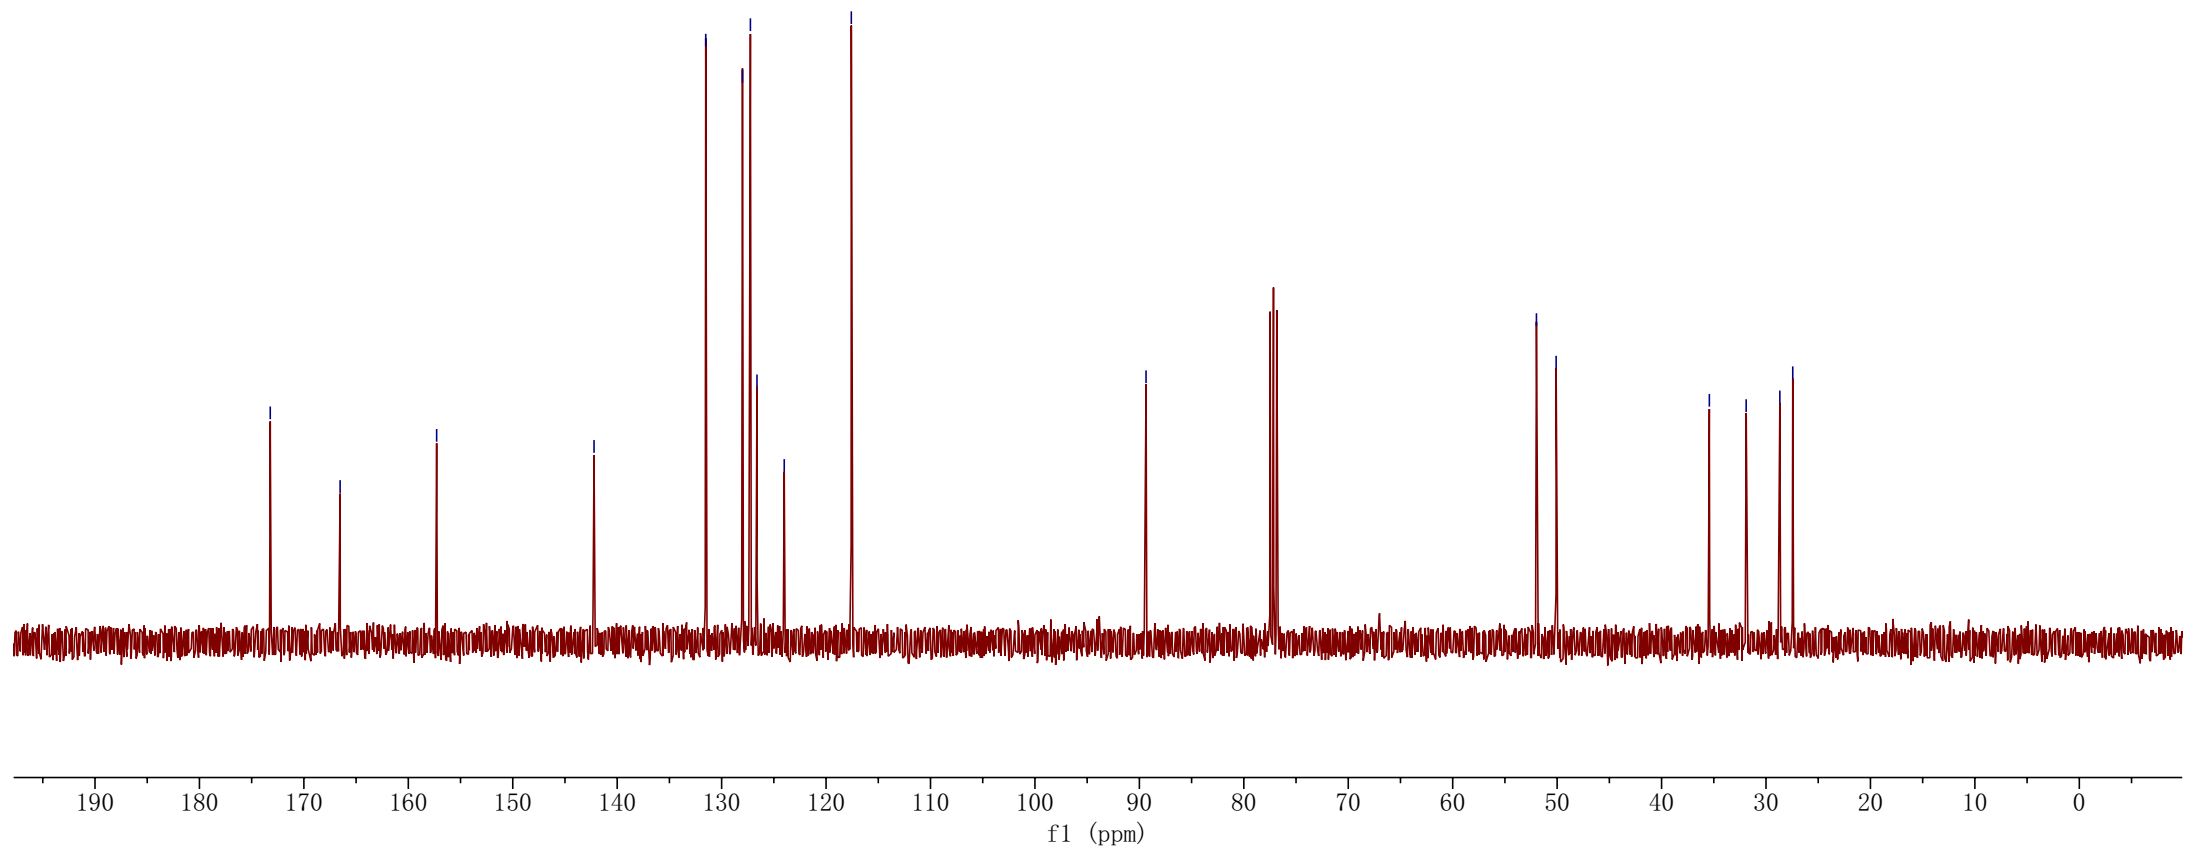

f1-7-130-5-1.fid  
P010

8.39 8.09 8.07 8.07 7.40 7.38 7.37 7.35 7.35 7.33 7.31 7.31 7.30 7.29 7.28 7.28 7.27 6.77 6.74 2.66 2.65 2.64 2.64 2.63 2.62 2.61 2.60 2.59 2.58 2.57 2.55 2.54 2.53 2.48 2.47 2.46 2.44 2.43 2.42 2.36 2.33 2.32 2.30 2.29 2.27 2.27 2.25 2.24 2.23 2.22 2.21 2.19

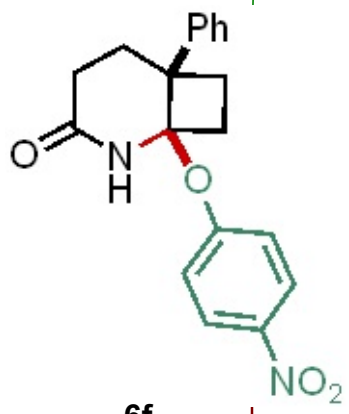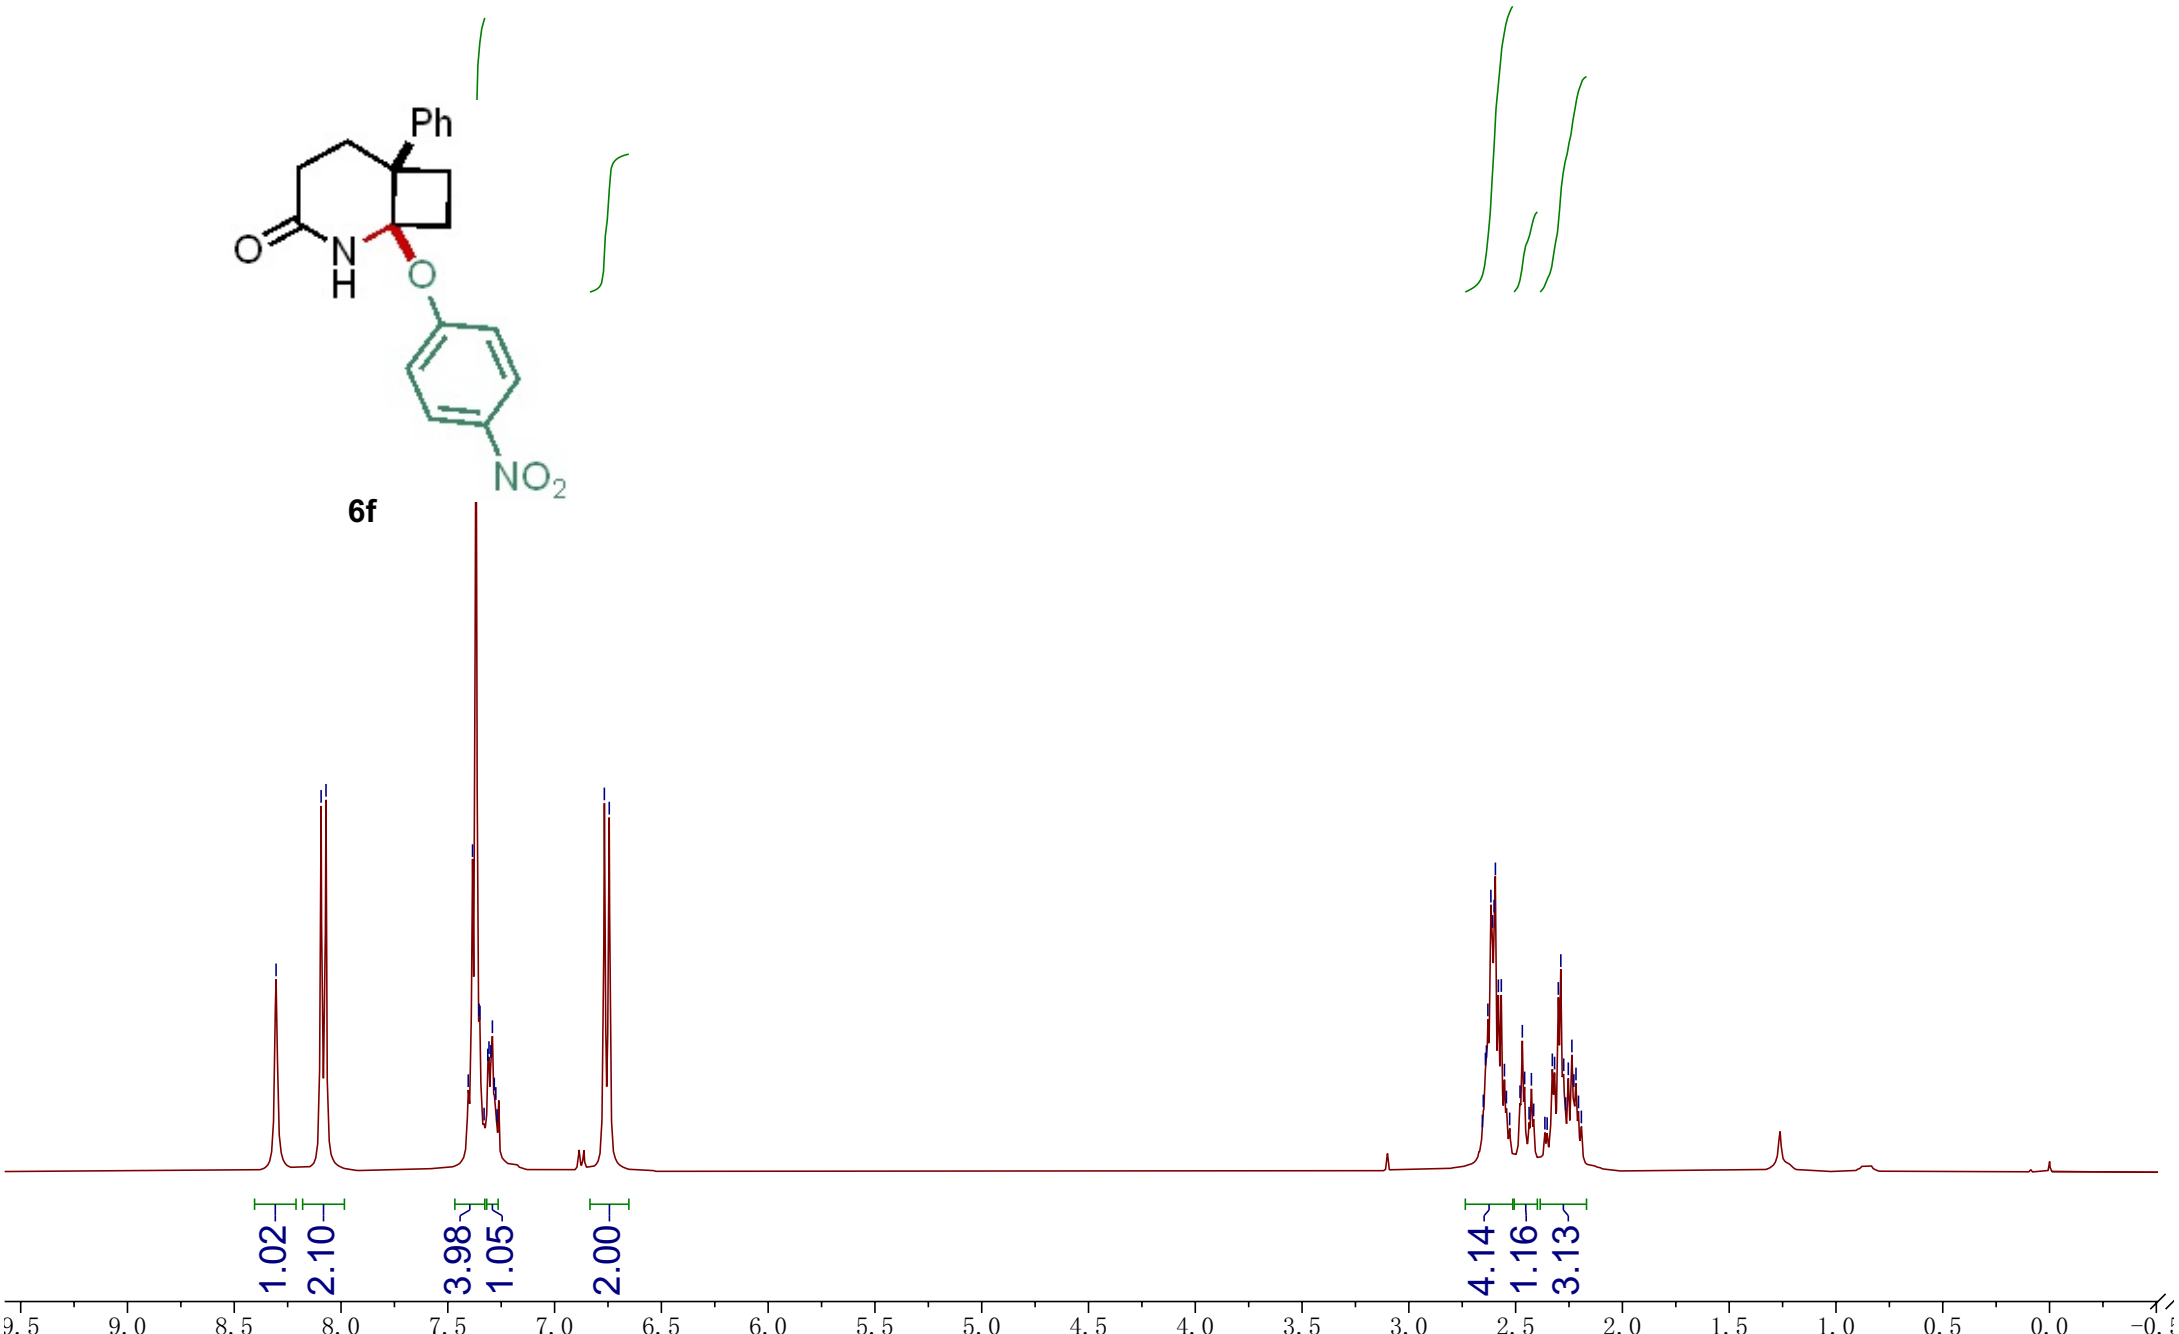

1.02

2.10

3.98

1.05

2.00

4.14

1.16

3.13

f1 (ppm)

278

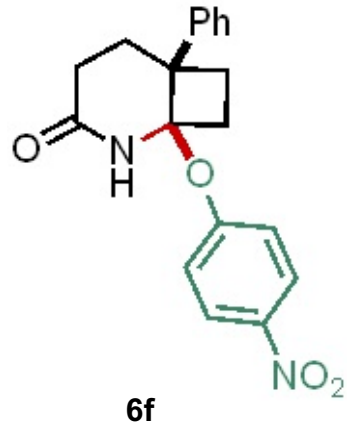

—174.04

—158.82

{142.36  
141.81

{128.16

{127.17

{126.87

{125.67

{117.91

—89.71

—50.17

{35.40

{31.98

{28.90

{27.66

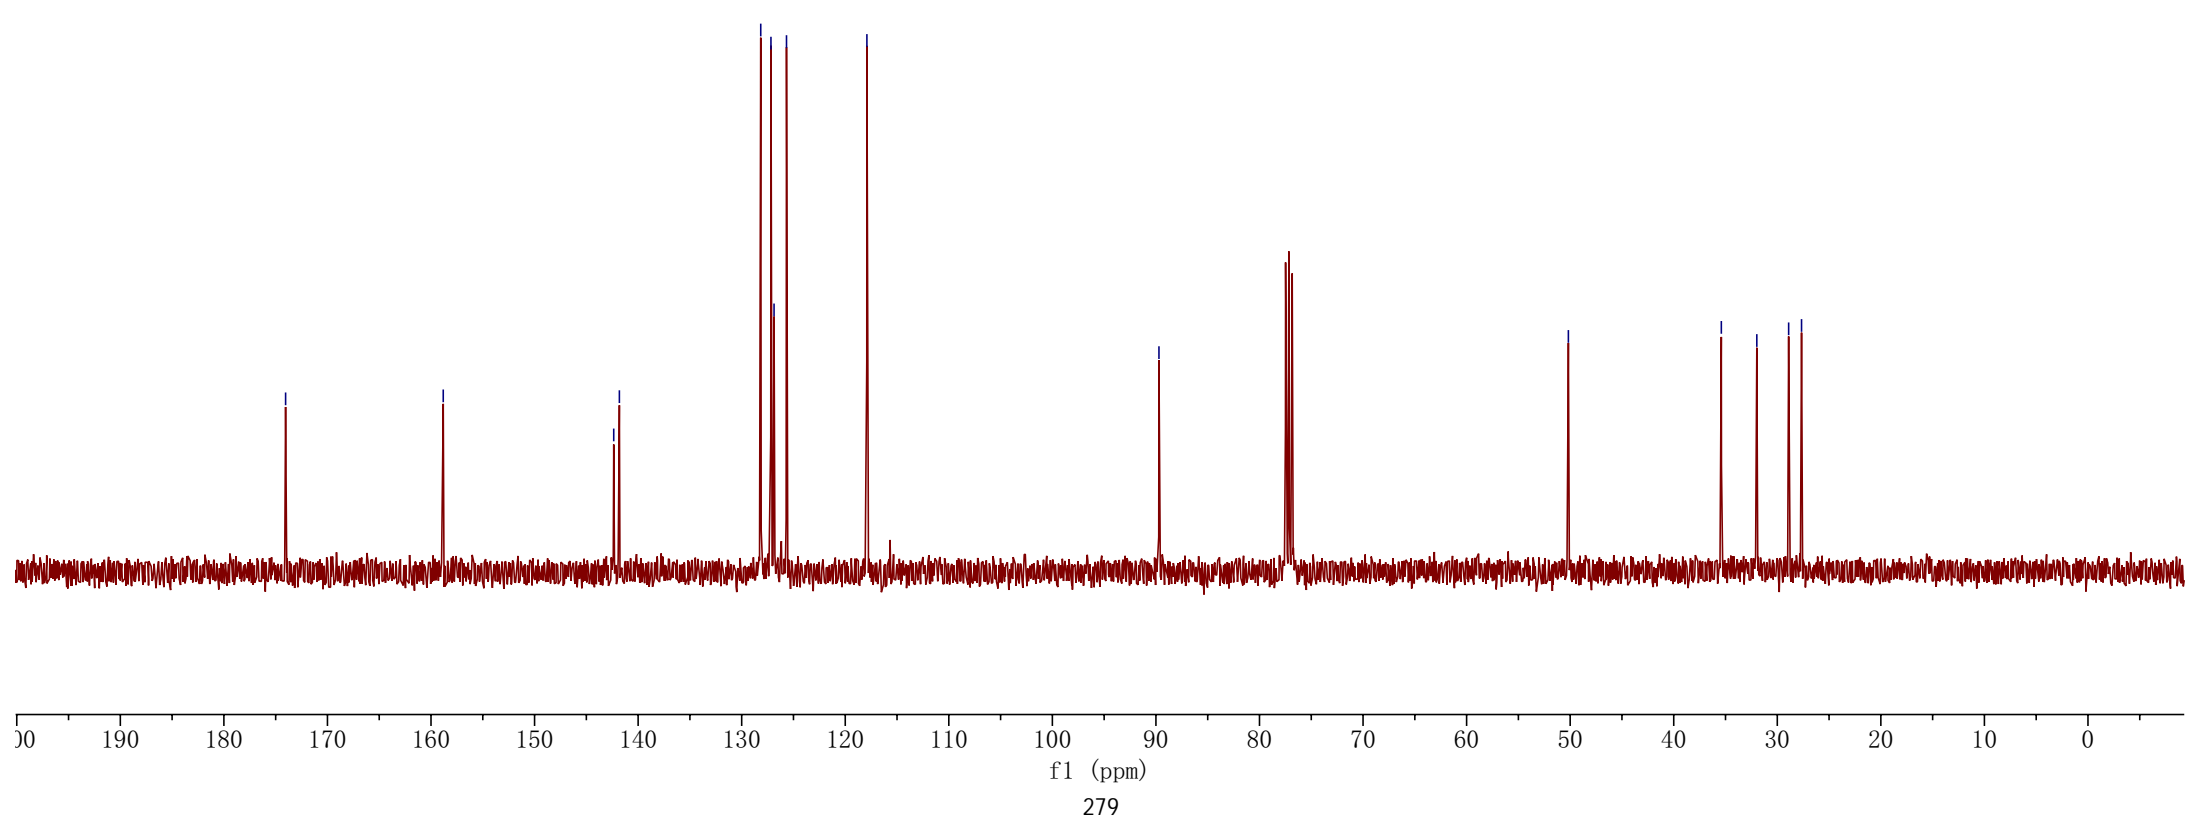

f1  
PR100

7.38  
7.37  
7.35  
7.35  
7.33  
7.27  
7.16  
7.13  
6.86  
6.54  
6.52  
6.47  
6.47  
2.83  
2.82  
2.81  
2.54  
2.53  
2.52  
2.51  
2.51  
2.50  
2.49  
2.48  
2.48  
2.47  
2.46  
2.41  
2.40  
2.36  
2.35  
2.33  
2.23  
2.21  
2.21  
2.20  
2.20  
2.19  
2.16  
2.13  
2.11  
1.96  
1.95  
1.54  
1.52  
1.52  
1.51  
1.50  
1.48  
1.45  
0.90

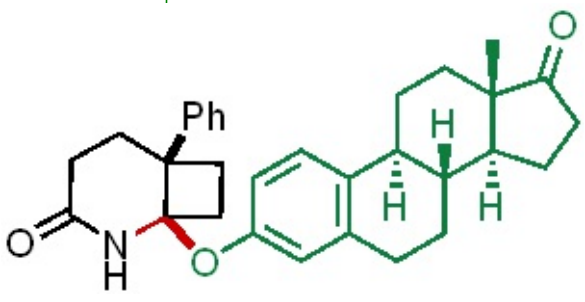

6g

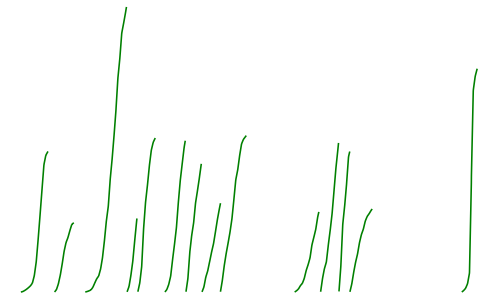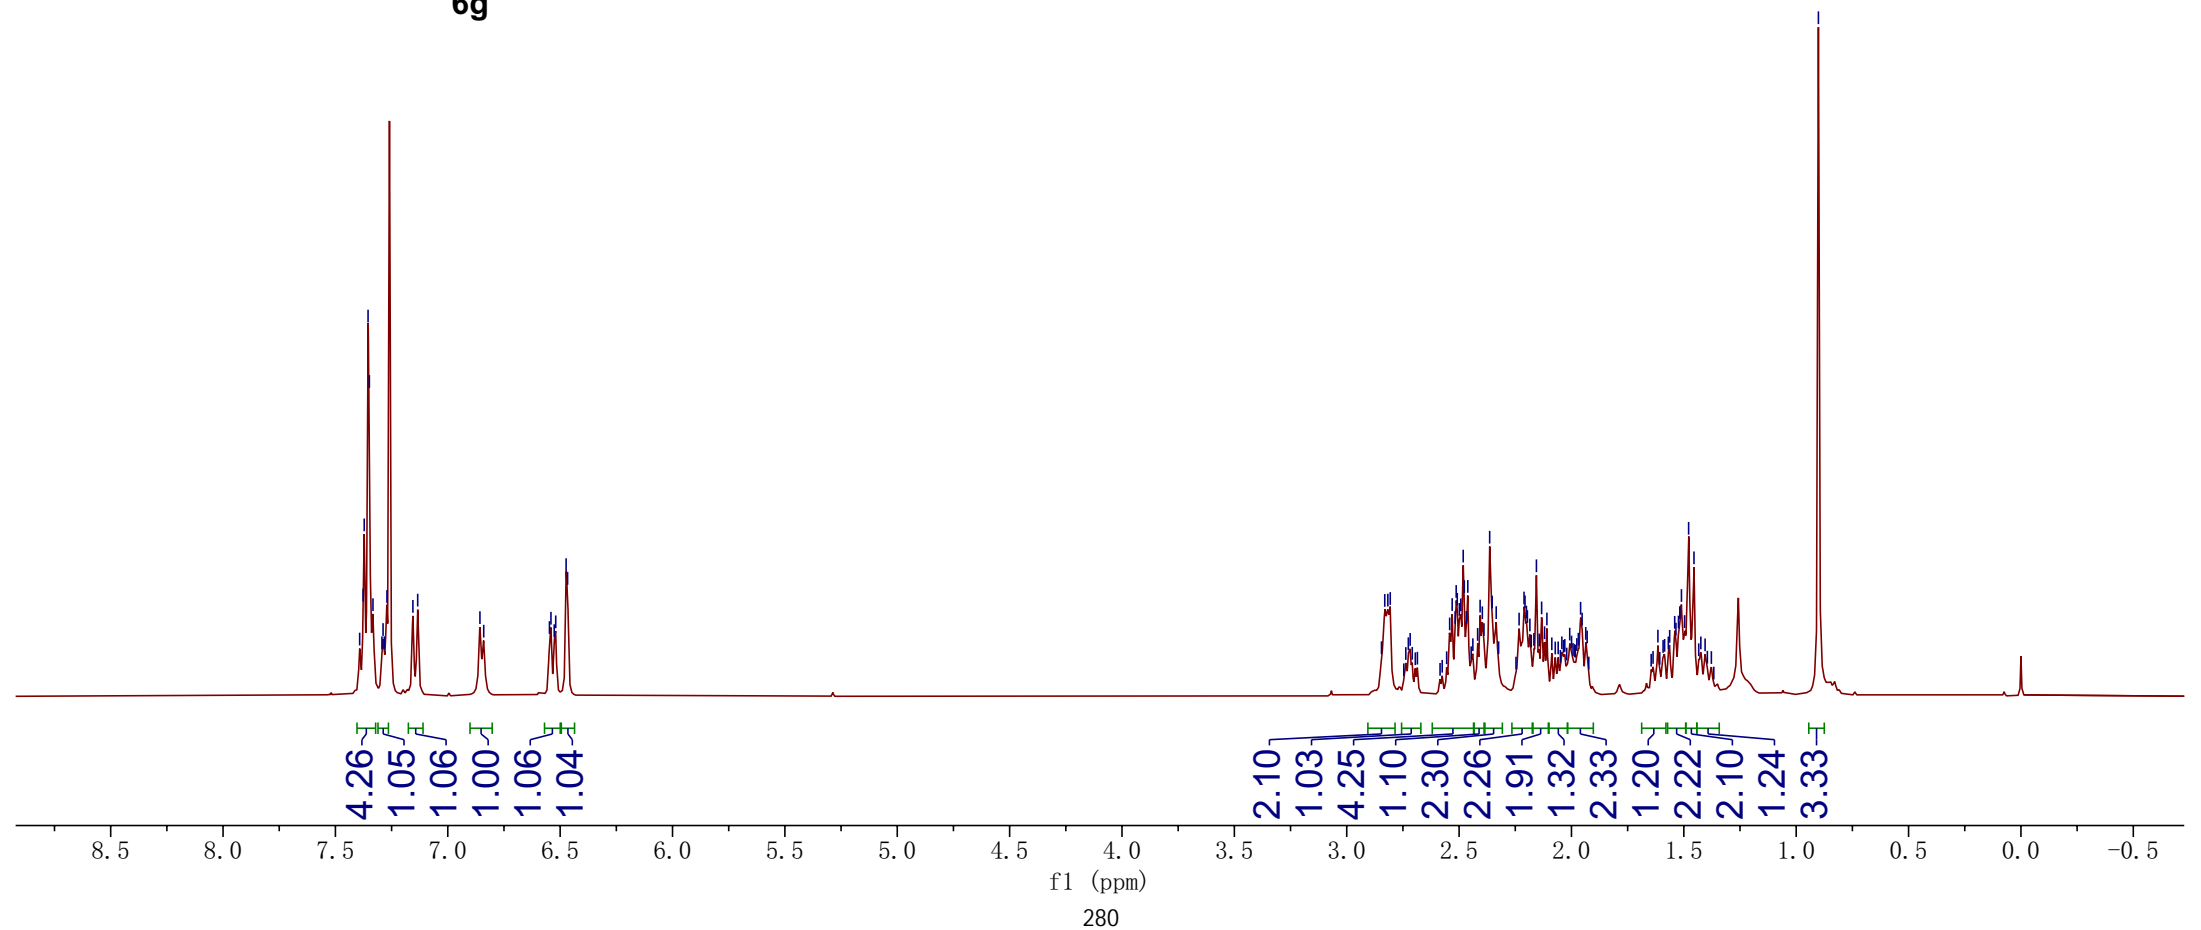

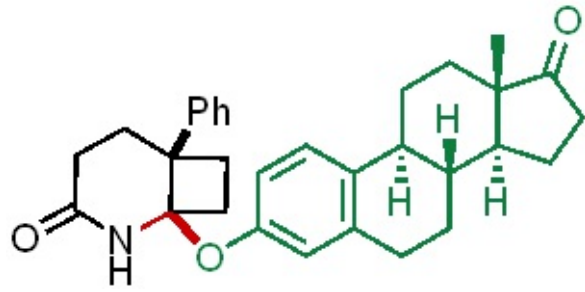

6g

-220.82

-172.45

151.08

142.69

138.36

134.36

128.00

127.40

126.67

126.51

118.97

118.87

116.15

116.09

89.29

89.27

50.50

50.06

48.06

44.05

38.29

35.94

35.49

31.91

31.65

29.64

28.48

27.26

26.50

25.92

21.67

13.94

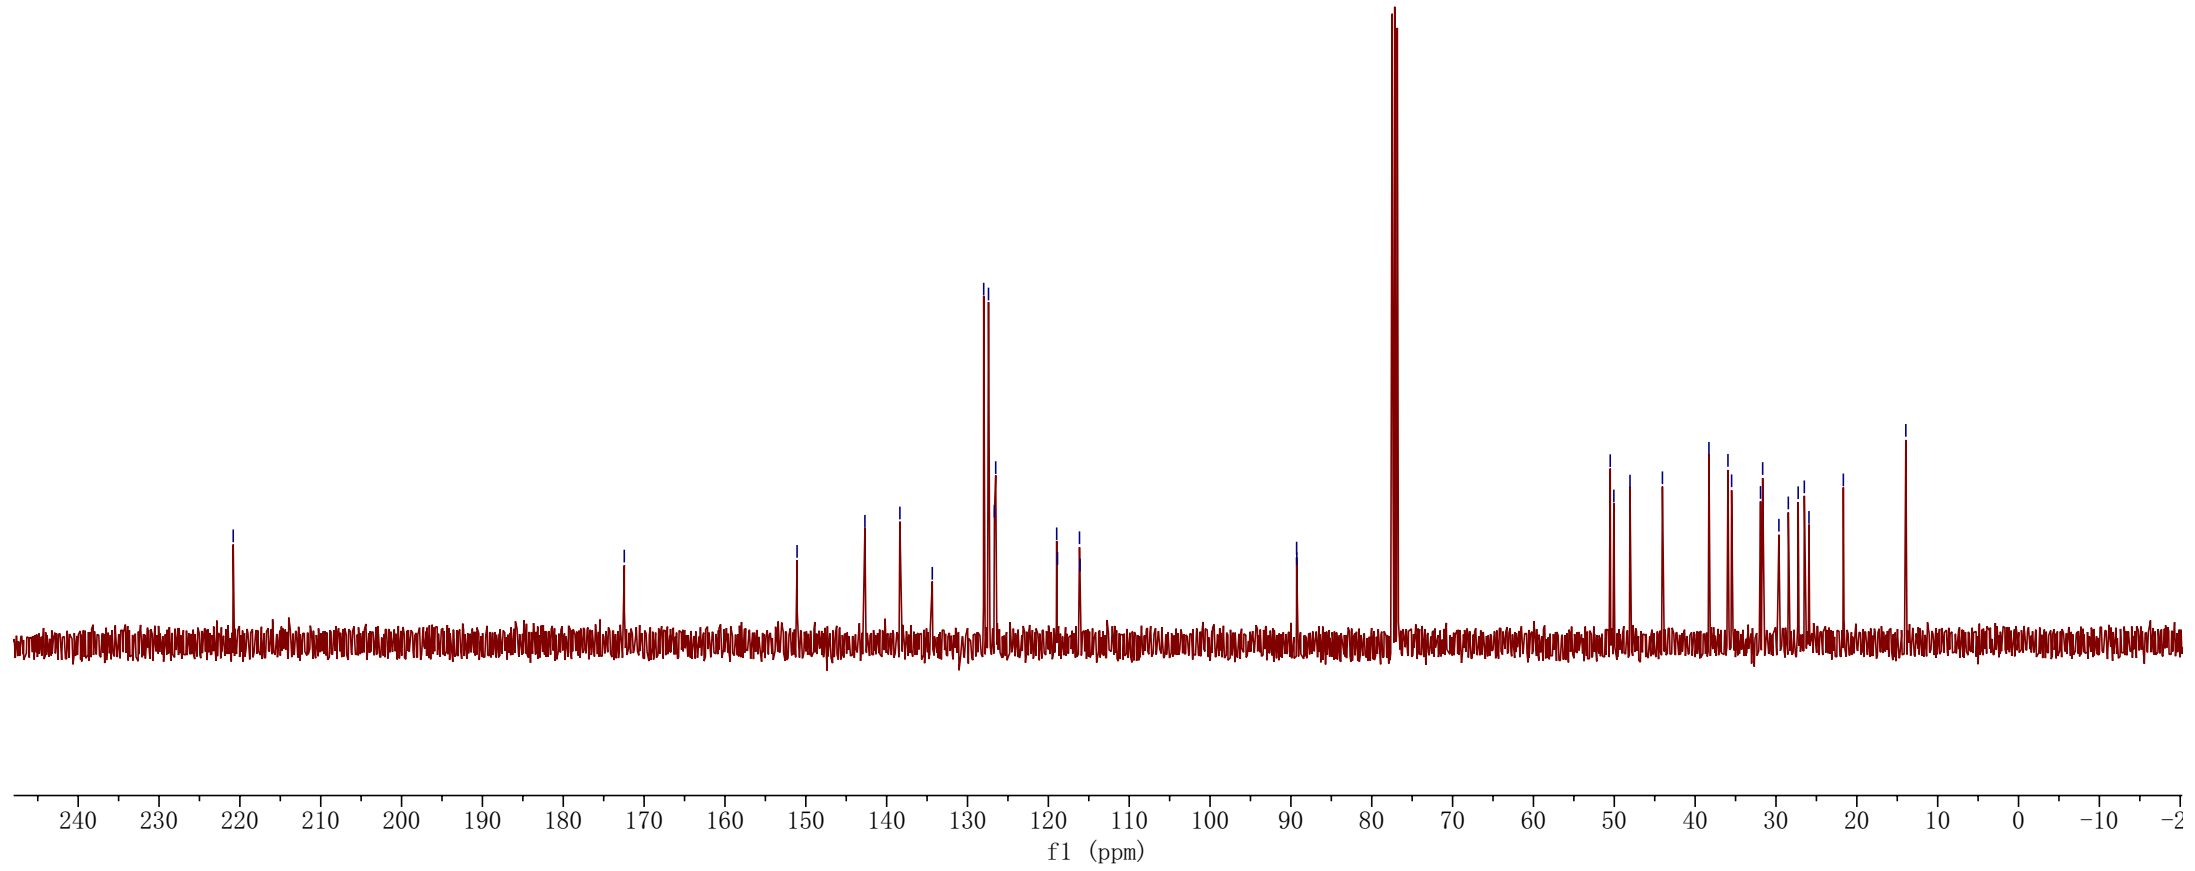

7.74 7.72 7.56 7.54 7.53 7.51 7.38 7.36 7.34 7.33 7.31 7.28 7.27 7.25 7.14 7.12 6.94 6.92 6.62 6.61 6.60 6.59 4.38 4.29 4.17 4.16 4.15 3.67 3.03 3.01 2.99 2.97 2.59 2.58 2.56 2.55 2.45 2.43 2.42 2.41 2.40 2.37 2.36 2.35 2.29 2.15 2.14 2.13 2.13 2.12 2.11

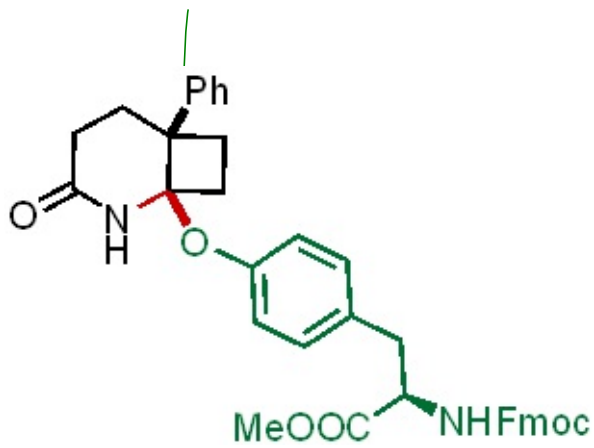

6h

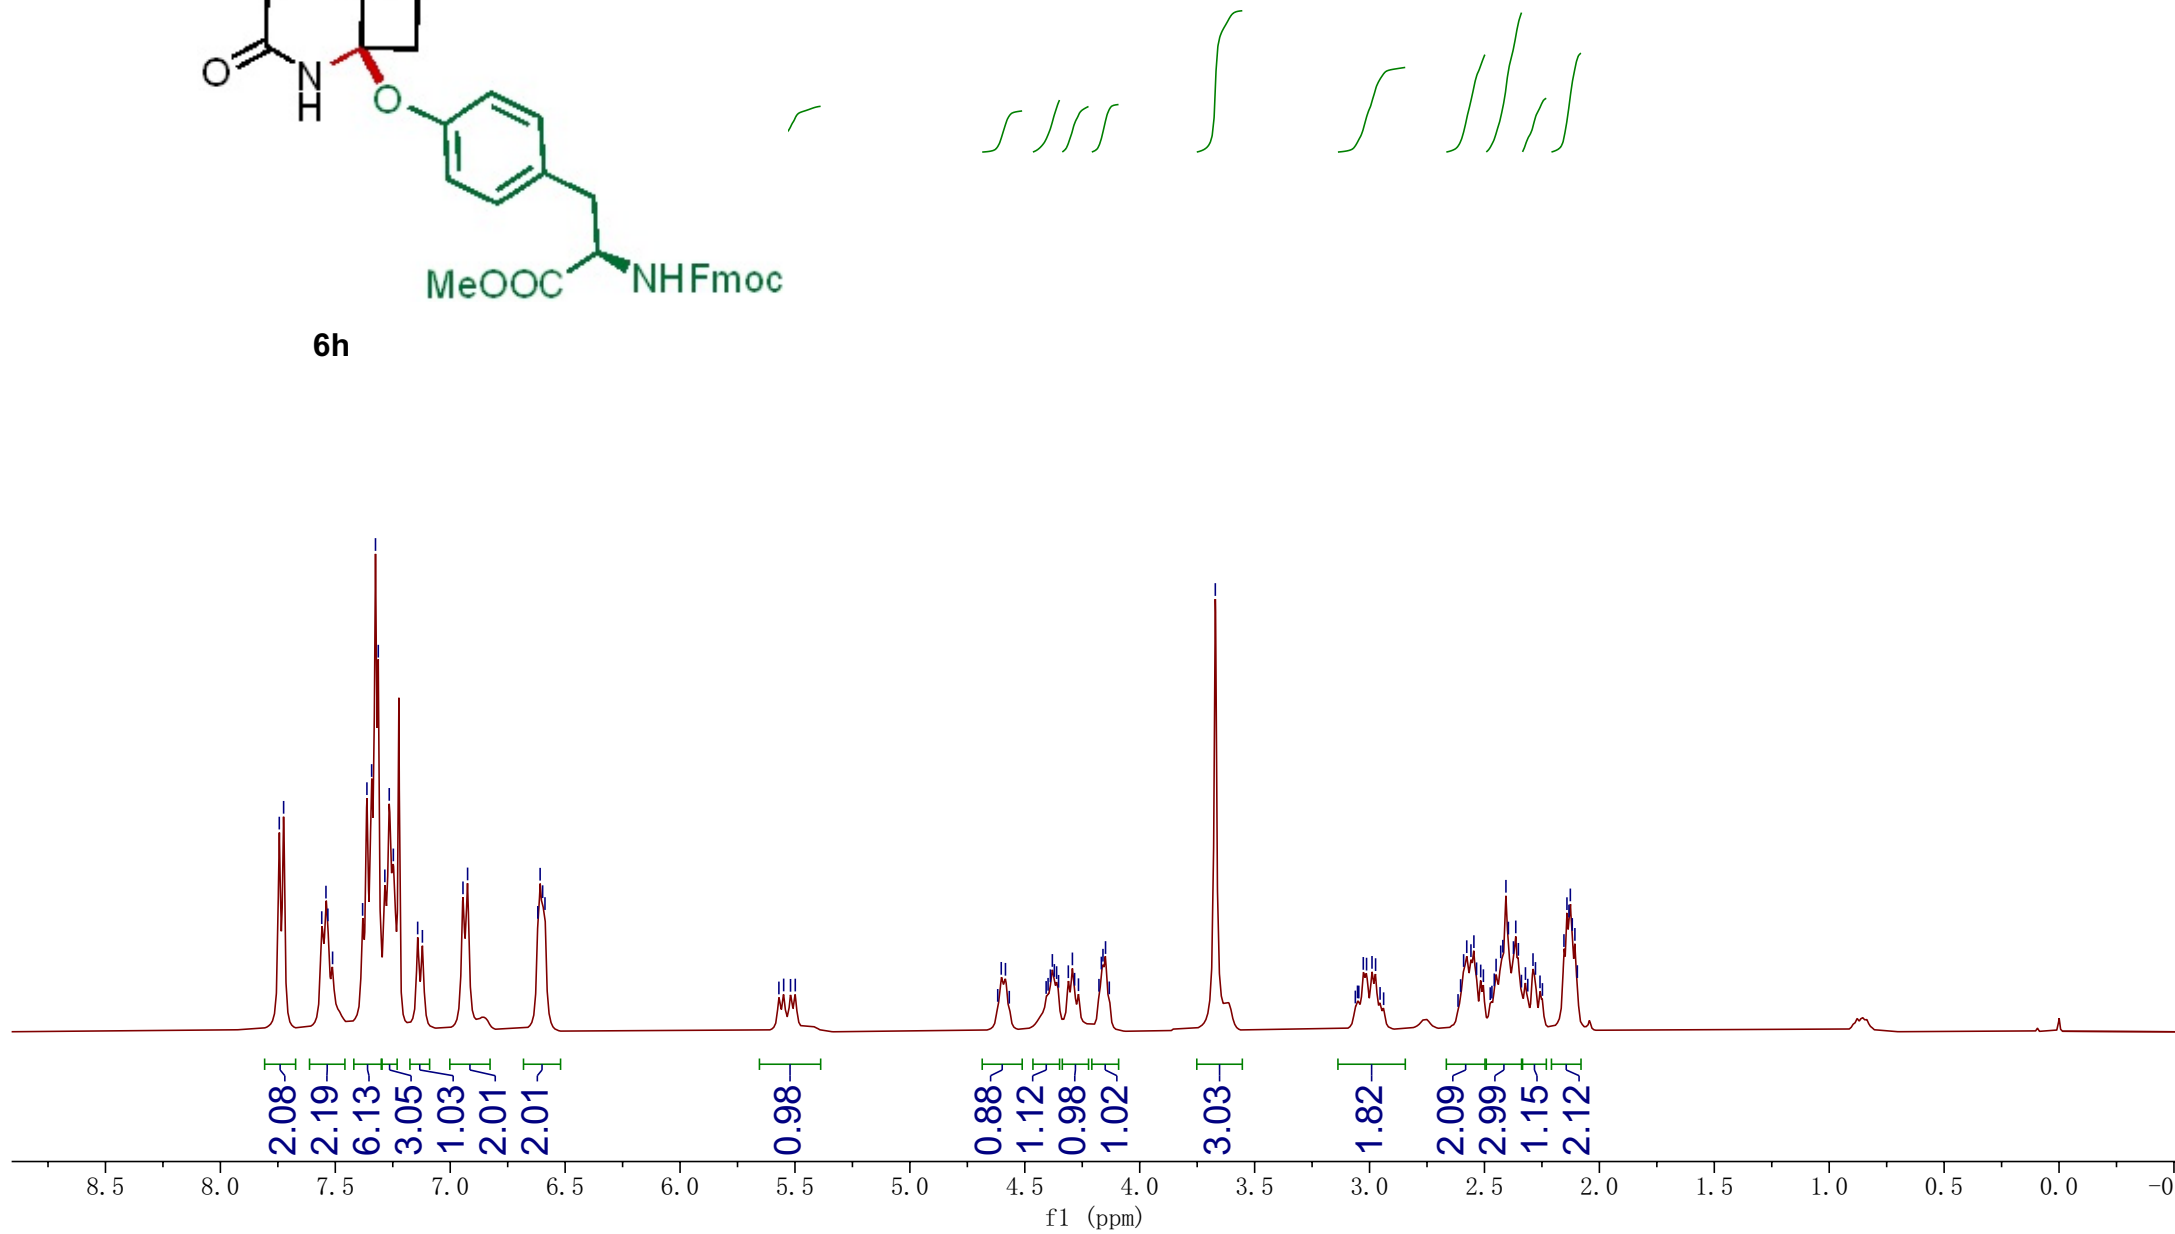

172.67  
172.64  
171.96  
155.59  
152.28  
143.83  
143.78  
143.75  
142.46  
141.29  
130.49  
130.07  
127.89  
127.71  
127.28  
127.06  
126.45  
125.10  
119.97  
118.88  
118.81  
89.25  
89.21

66.87

54.85  
52.33  
50.01  
47.14  
37.28  
35.33  
31.59  
28.56  
27.08

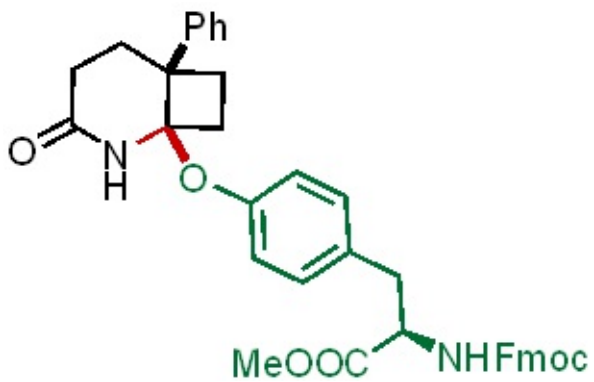

6h

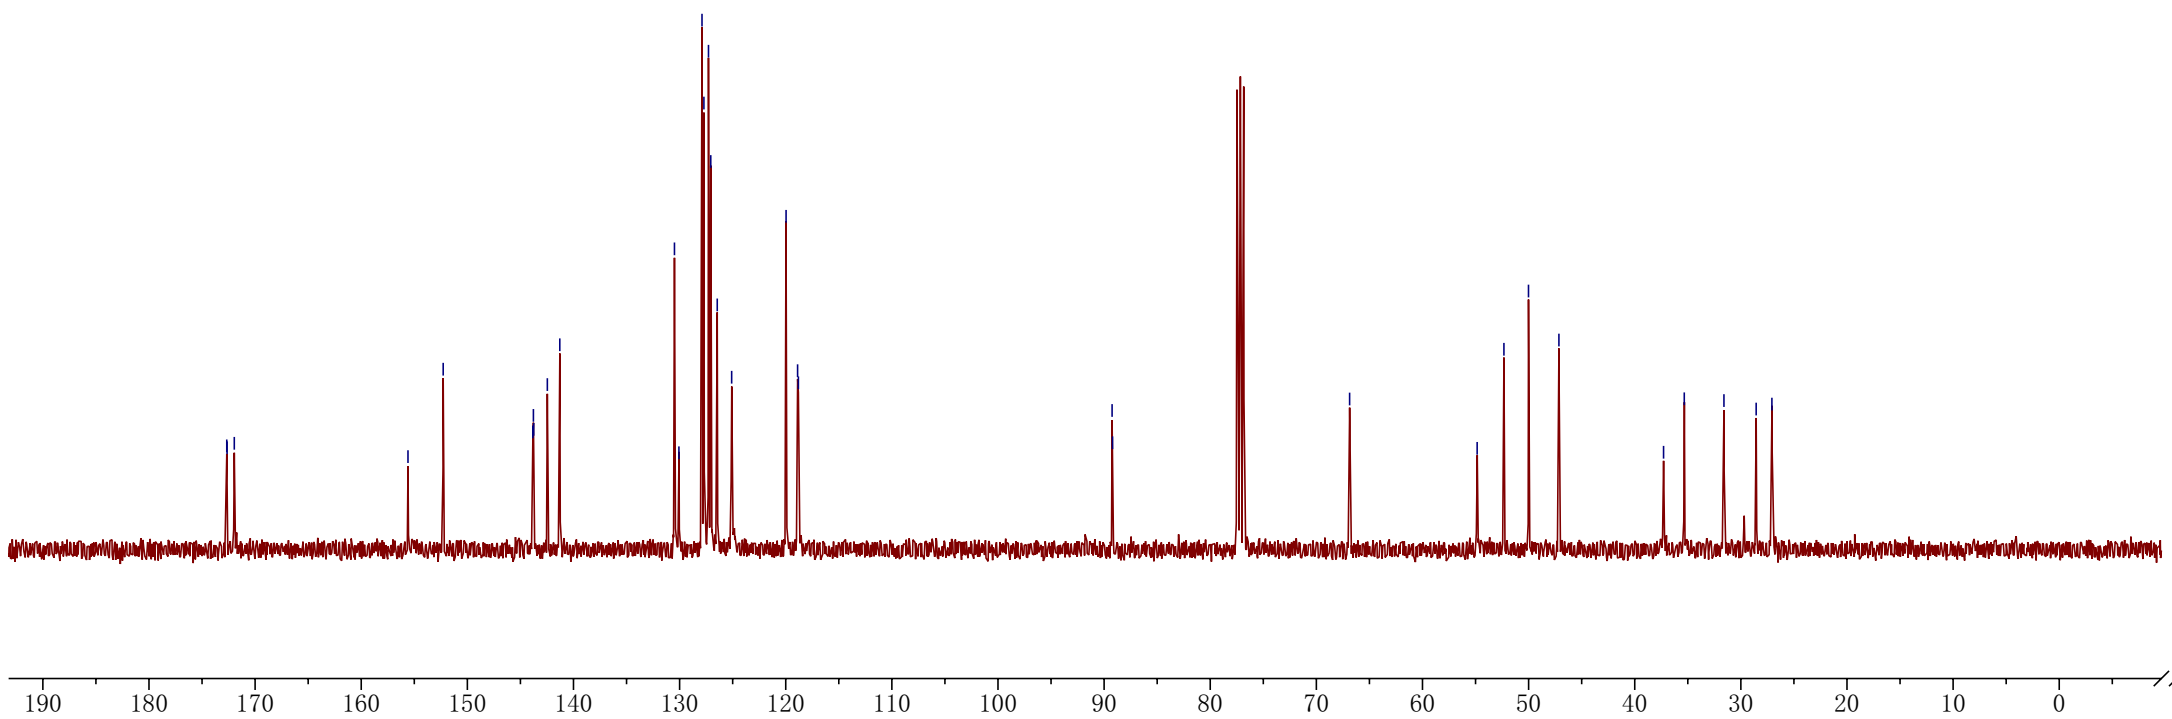

f1 (ppm)

fid  
7.135-2.1  
fid

7.56 7.54 7.53 7.42 7.41 7.39 7.35 7.35 7.34 7.33 7.32 7.11 7.09 2.71 2.69 2.67 2.65 2.64 2.55 2.54 2.54 2.53 2.52 2.52 2.51 2.50 2.49 2.47 2.46 2.44 2.43 2.40 2.39 2.39 2.38 2.36 2.35 2.33 2.29 2.28 2.27 2.26 2.26 2.25 2.24 2.17 2.16 2.16 2.15 2.14 2.13

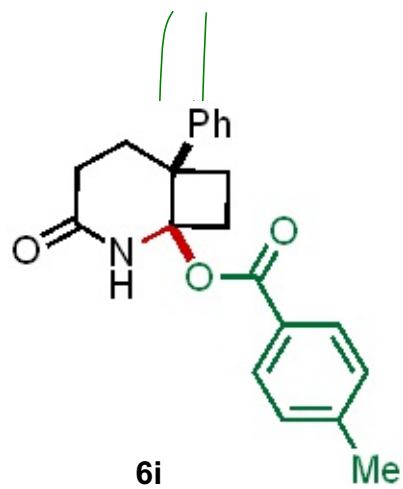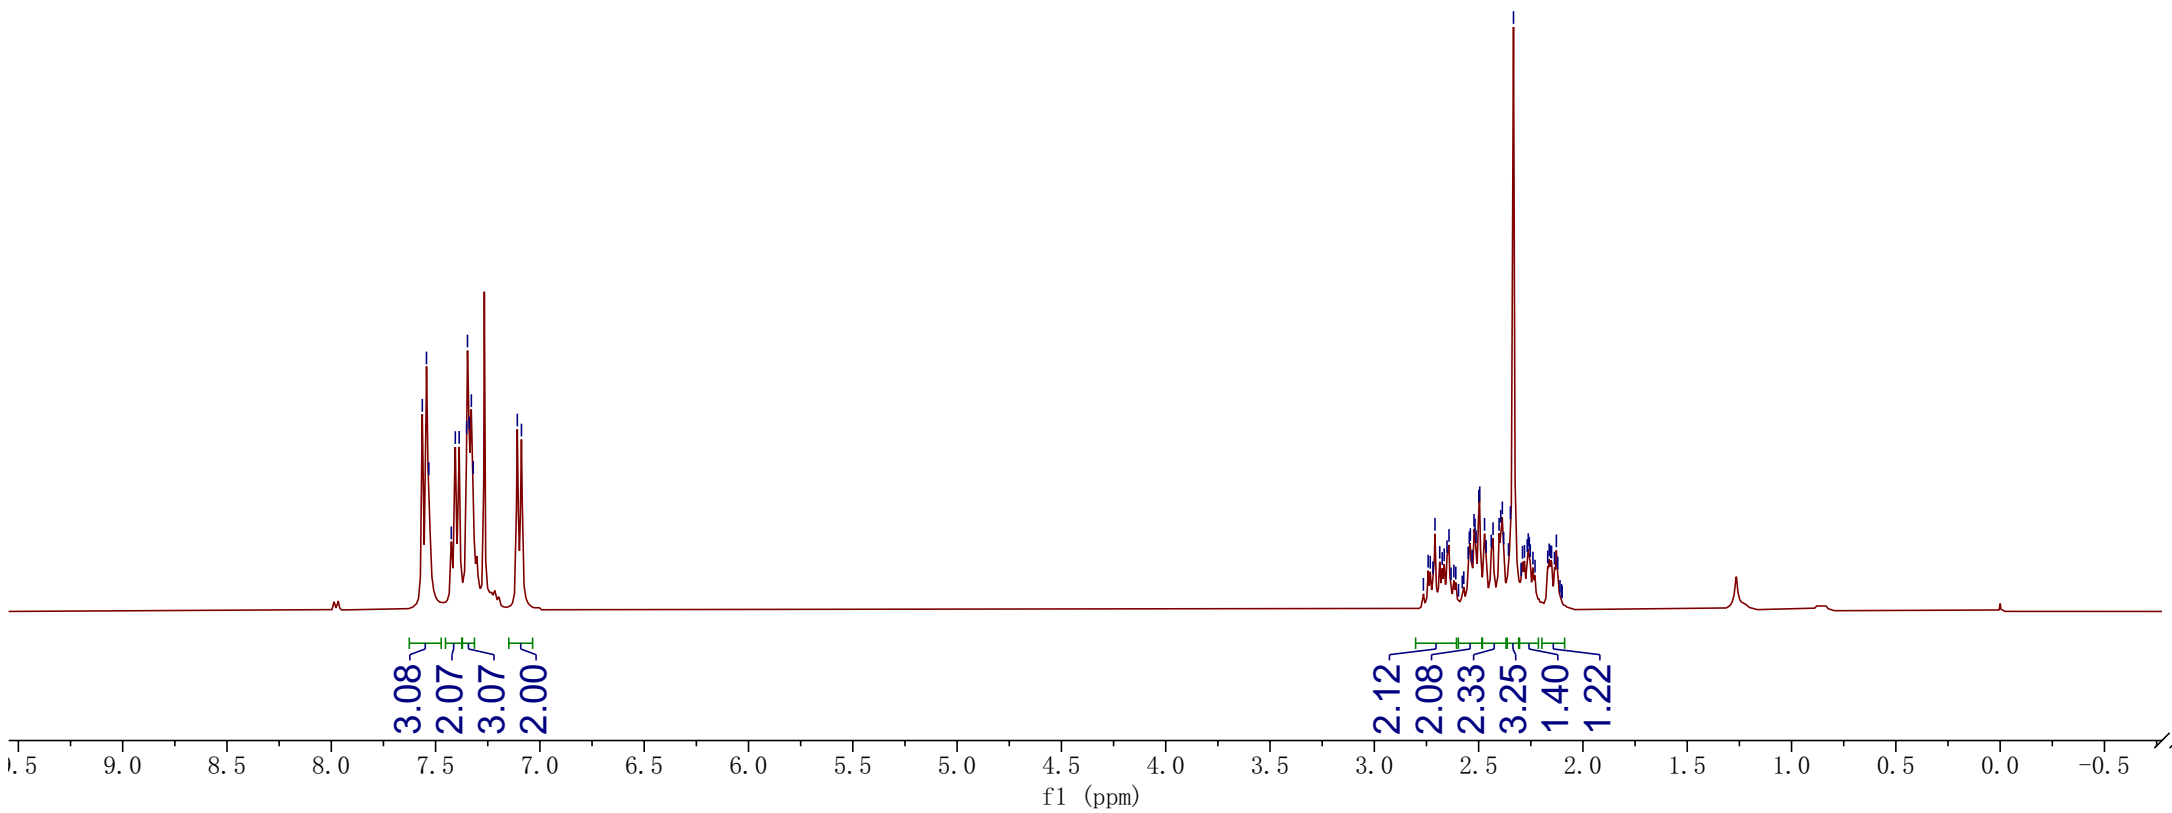

—171.70

—166.15

~144.44

~142.46

129.80

129.21

128.09

127.20

126.97

126.74

—90.31

—48.76

~35.29

~32.93

27.99

27.81

~21.72

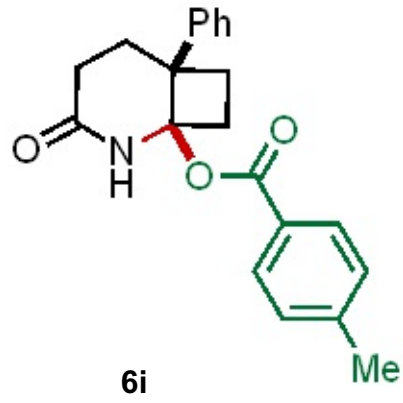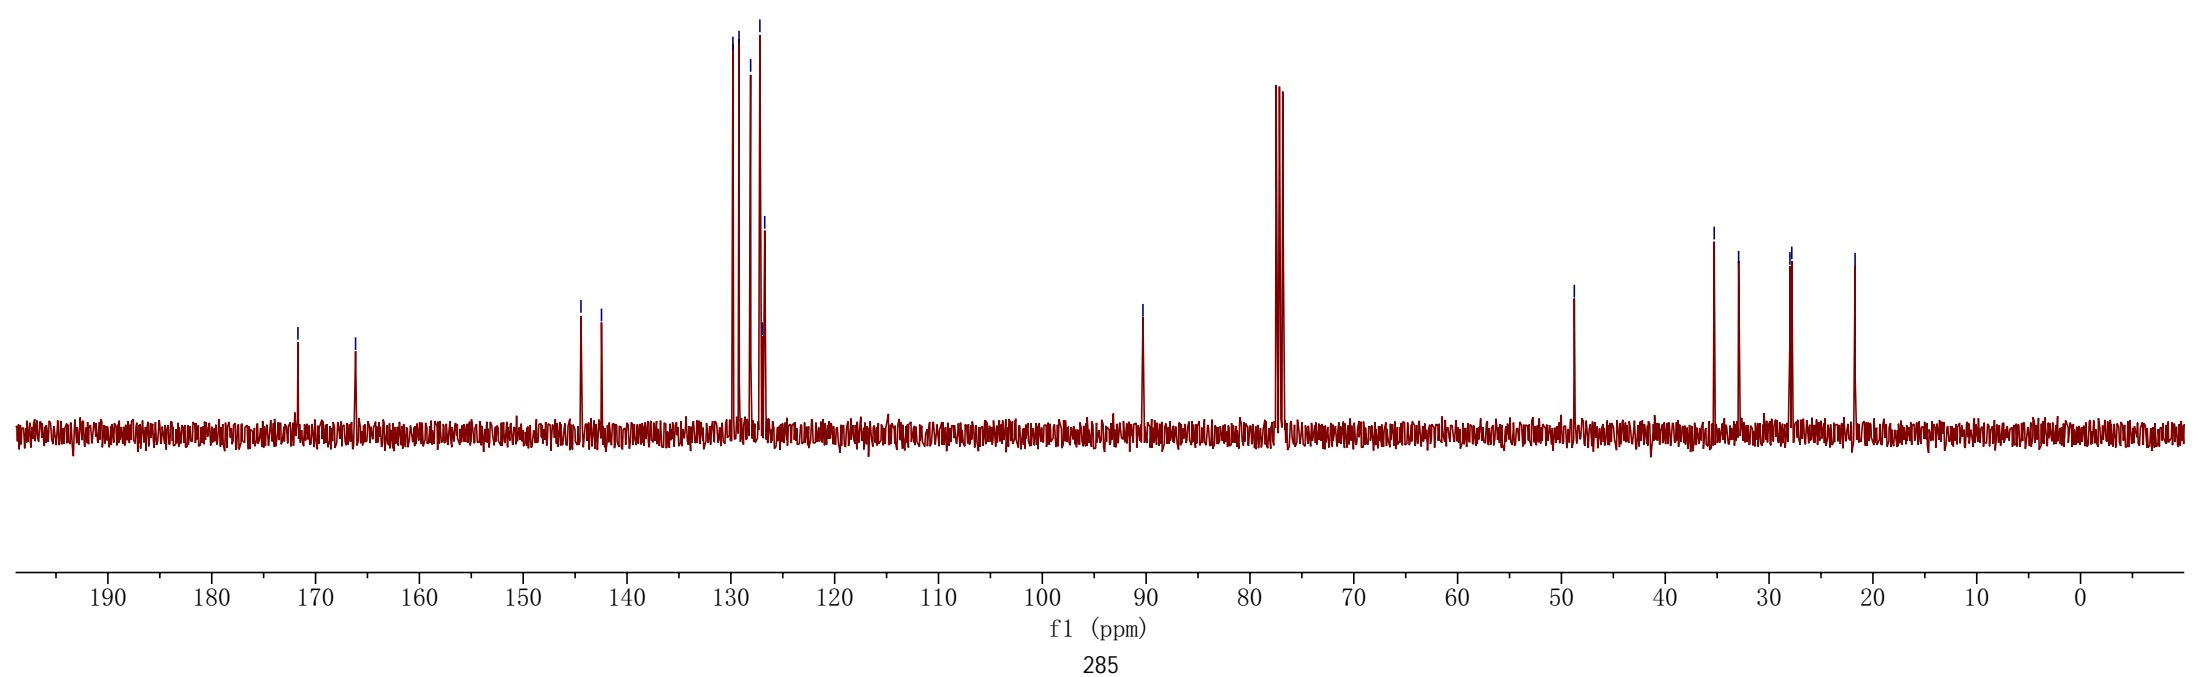

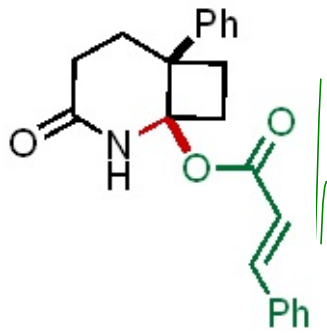

6j

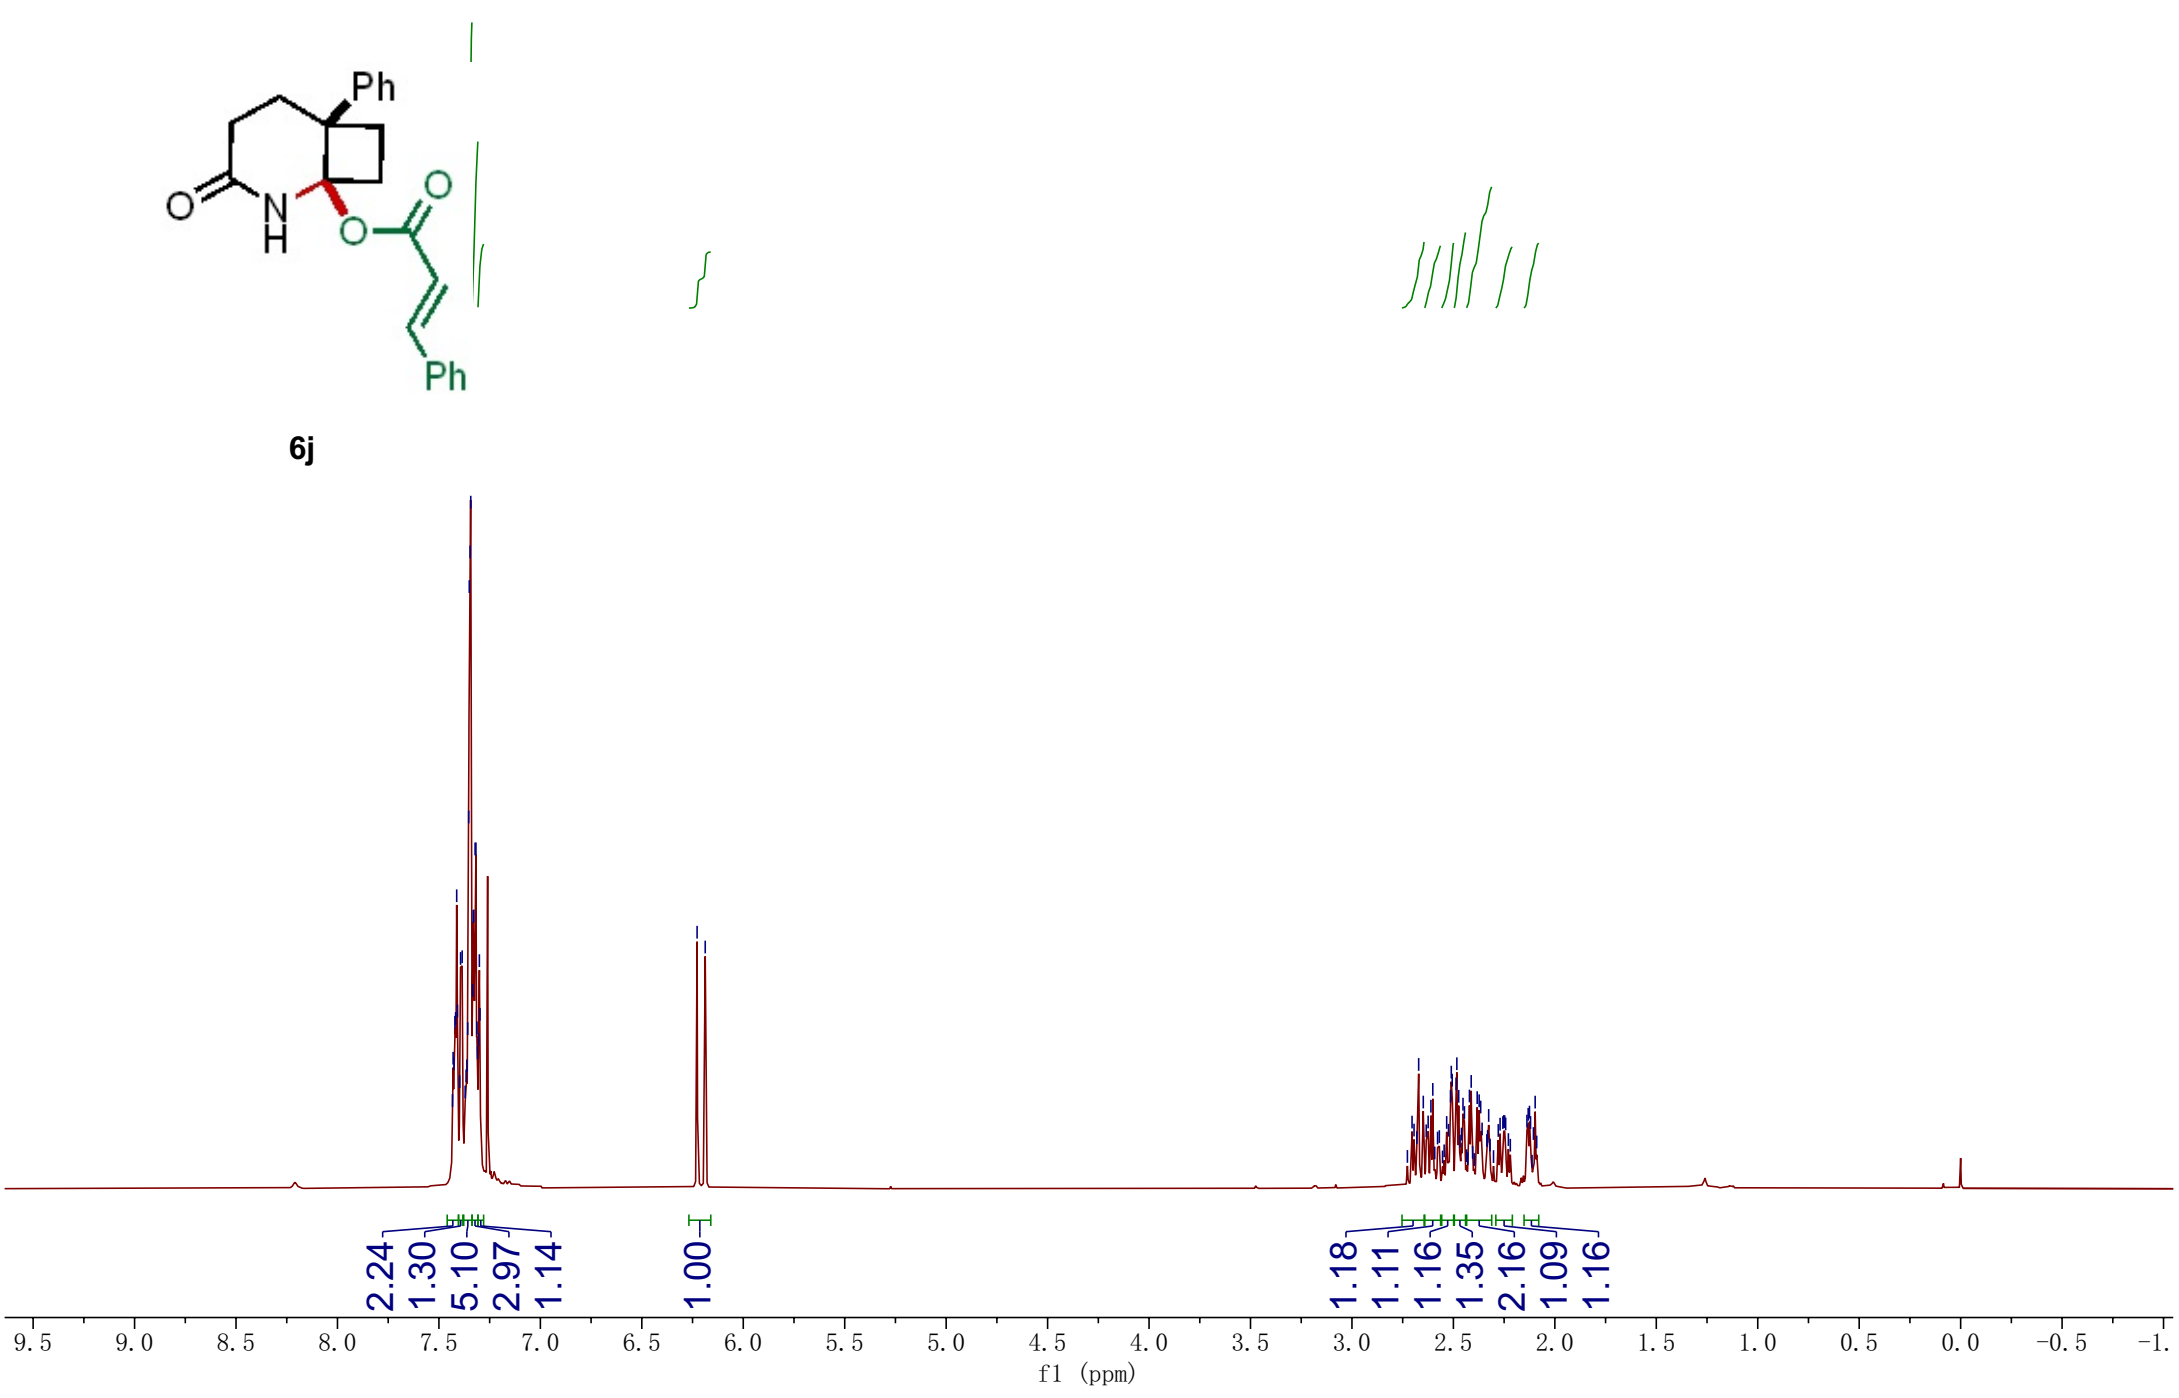

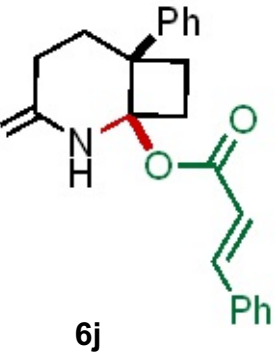

—171.61  
—166.40  
146.52  
142.55  
133.96  
130.79  
128.98  
128.30  
128.11  
127.23  
126.68  
—117.63

—90.18

—48.70

35.34  
32.89  
27.94  
27.75

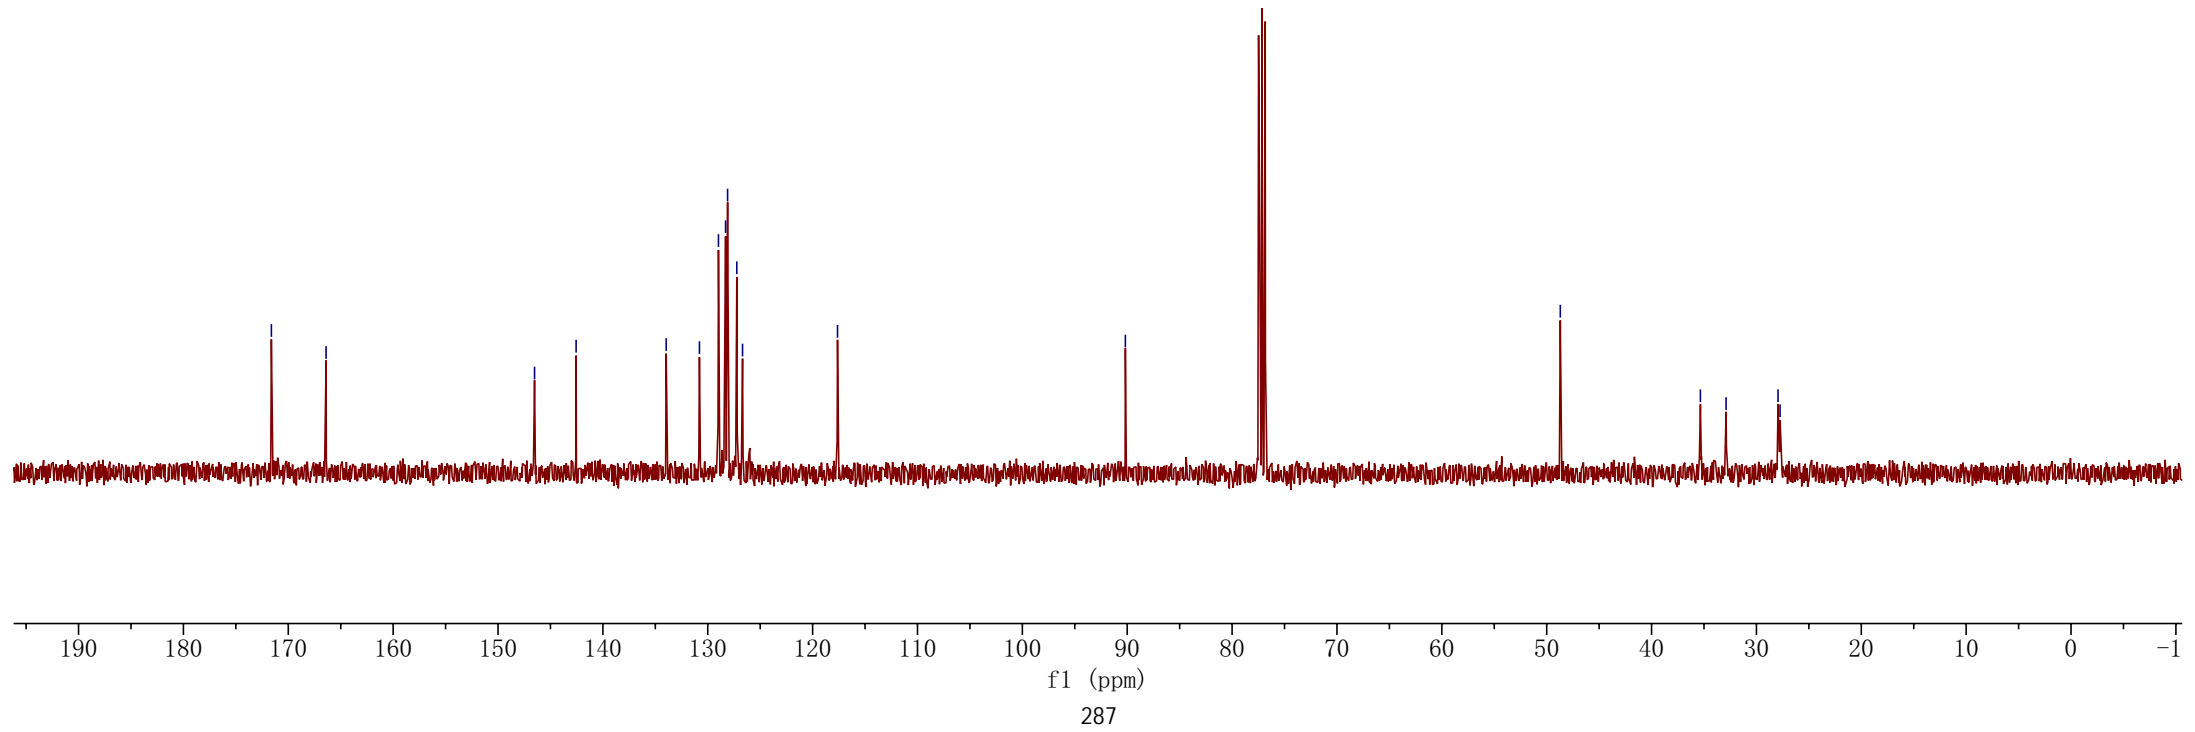

f1  
test

7.38  
7.37  
7.35  
7.33  
7.26  
7.24  
7.22  
2.66  
2.65  
2.64  
2.63  
2.62  
2.61  
2.60  
2.58  
2.56  
2.54  
2.53  
2.51  
2.49  
2.48  
2.47  
2.46  
2.44  
2.43  
2.41  
2.39  
2.37  
2.35  
2.34  
2.32  
2.31  
2.30  
2.26  
2.24  
2.22  
2.22  
2.20  
2.19  
2.15  
2.14  
2.11  
2.11  
2.09  
2.08  
2.07  
2.05  
1.02  
1.00  
0.99  
0.97

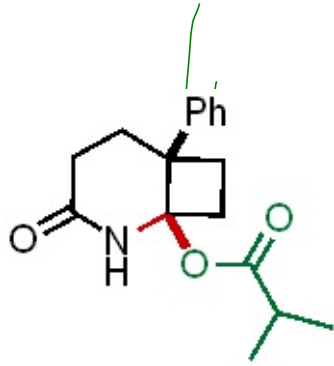

6k

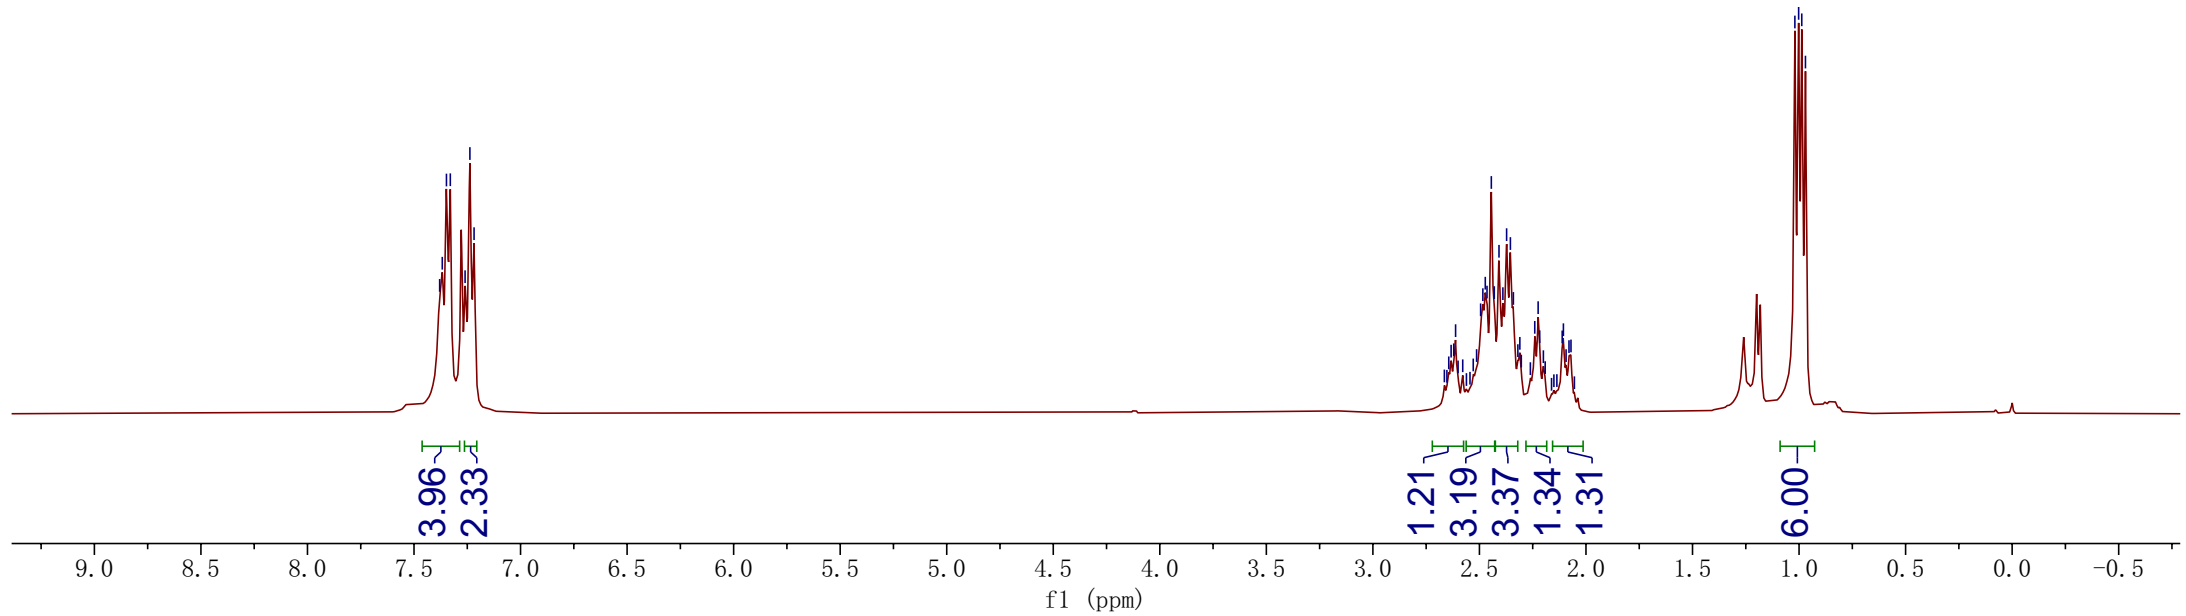

fqk-7-141-3-cccc. 3. fid  
test

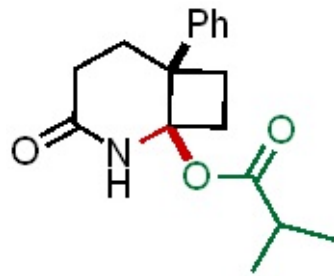

6k

-176.94  
-171.73

-142.34

128.00  
127.07  
126.64

-89.91

-48.66  
35.21  
34.40  
33.01  
27.93  
27.68  
18.54  
18.40

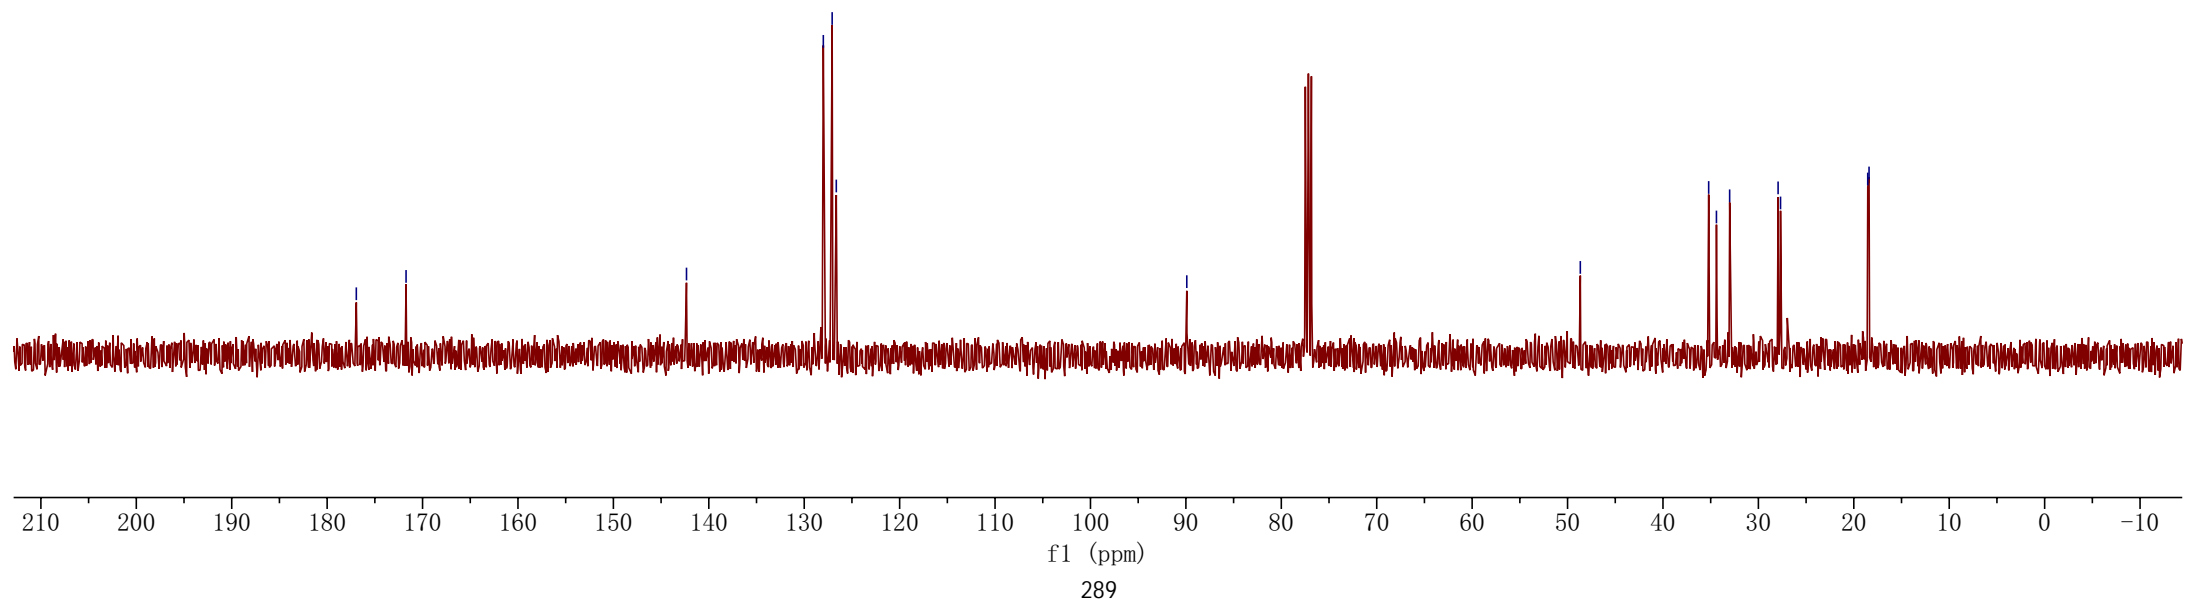

f1-7-50-3-1.fid  
PROTON

7.42 7.41 7.40 7.40 7.39 7.38 7.14 7.13 7.11 7.09 7.08 7.06 7.03 7.02 7.01 7.00 6.99 6.97 6.96 6.62 6.51 3.17 2.81 2.81 2.80 2.79 2.78 2.77 2.54 2.52 2.51 2.50 2.49 2.48 2.46 2.45 2.45 2.44 2.42 2.42 2.41 2.40 2.05 2.01 2.00 1.99 1.98 1.97 1.96 1.95 1.94

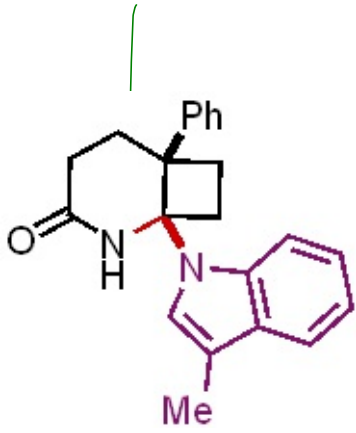

7a

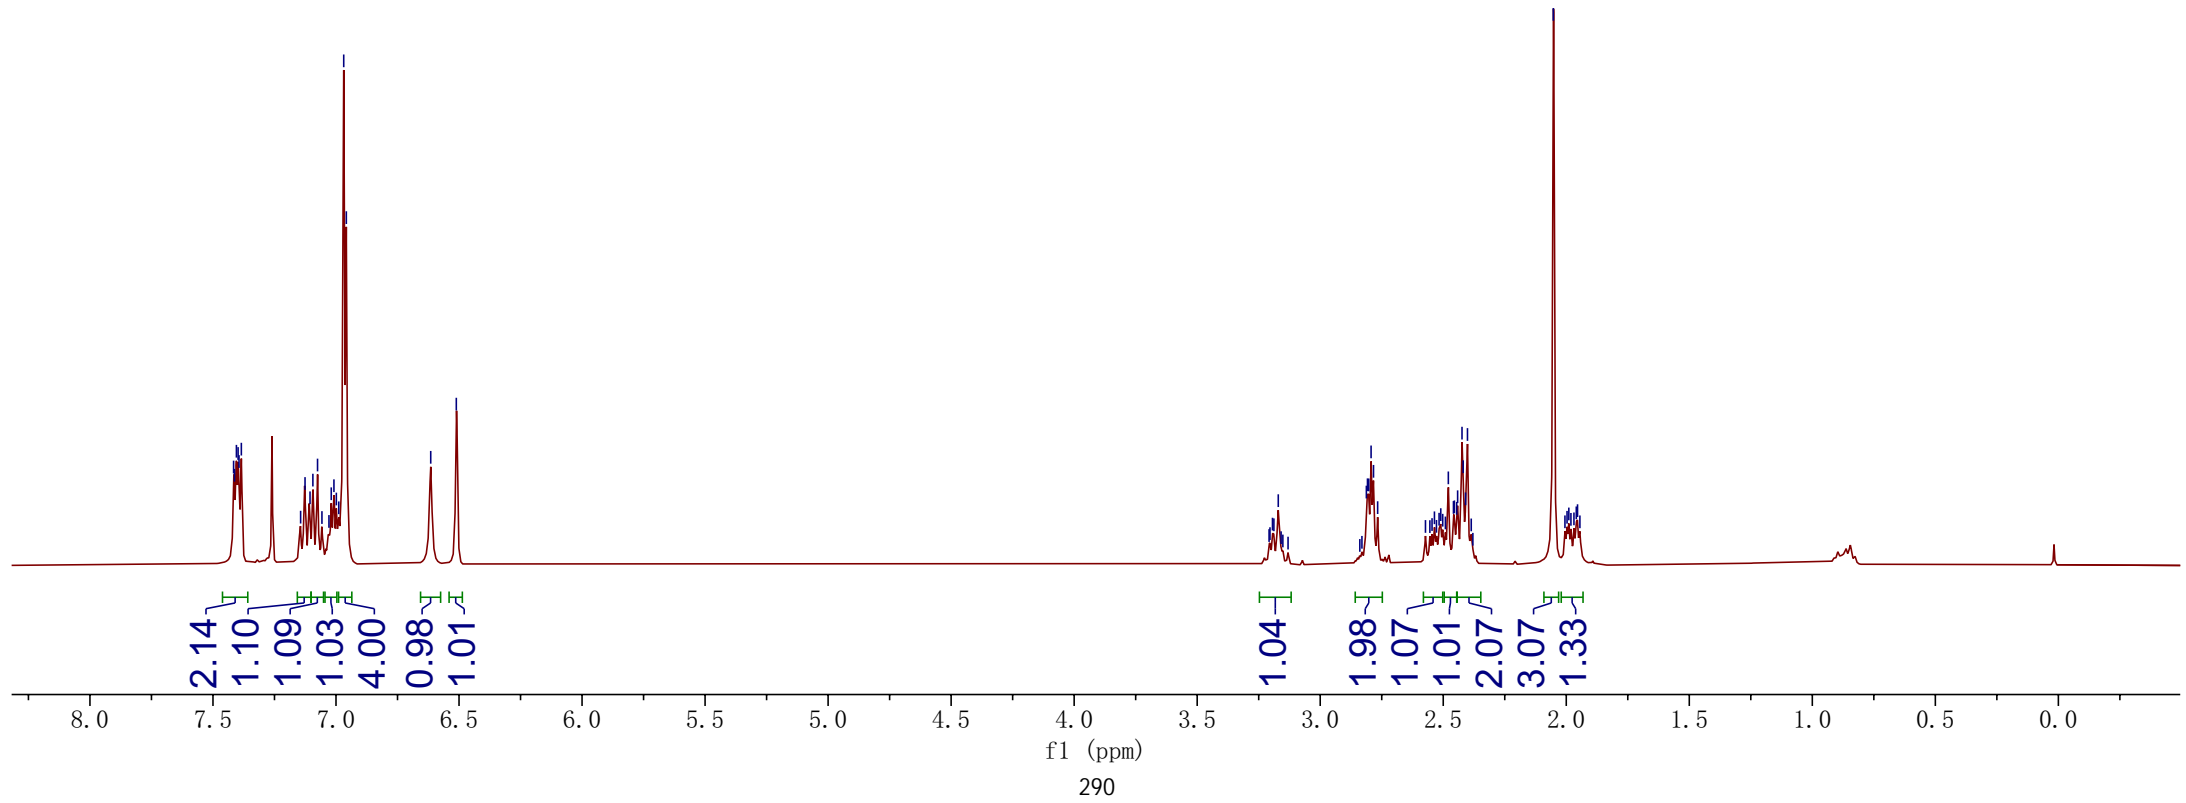

—171.50  
140.18  
135.72  
130.65  
127.97  
126.98  
126.23  
123.19  
122.14  
119.58  
119.12  
112.58  
111.46  
—76.29  
—51.74  
~34.19  
~30.10  
~28.85  
~21.36  
—9.39

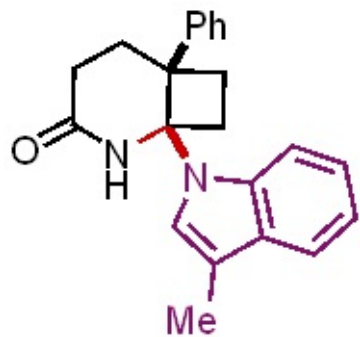

7a

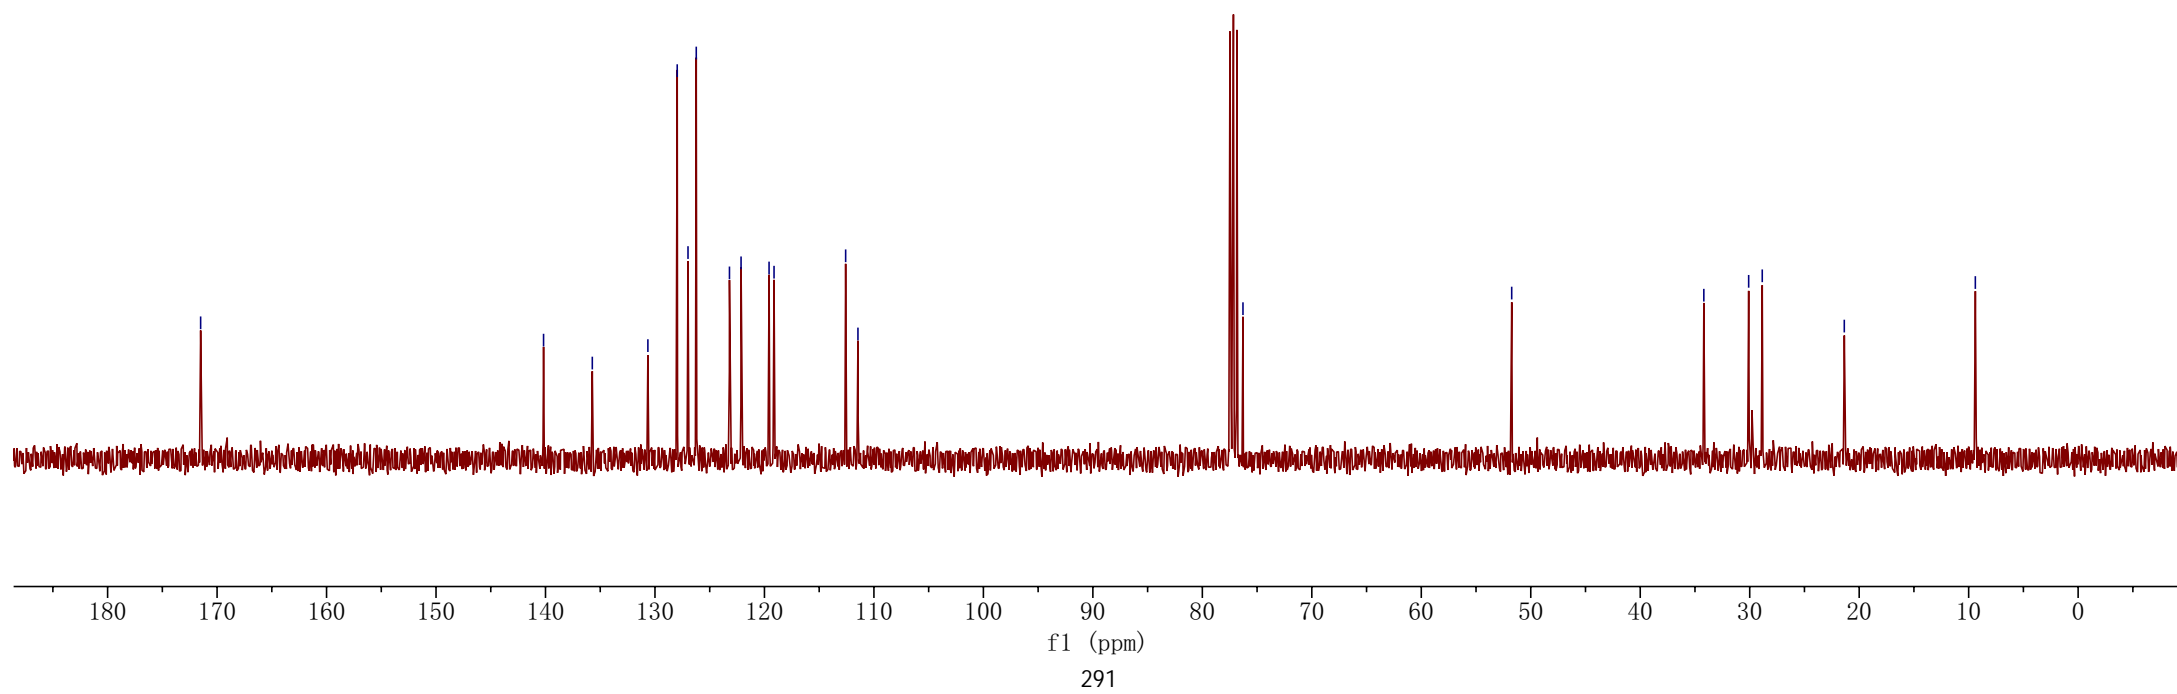

7.46 7.46 7.45 7.44 7.44 7.24 7.23 7.23 7.13 7.11 7.09 7.05 6.95 6.93 6.92 6.48 6.46 2.78 2.77 2.76 2.75 2.74 2.74 2.72 2.71 2.71 2.70 2.68 2.31 2.28 2.26 2.22 2.20 2.19 2.18 2.17 2.15 2.14 2.12 2.12 2.11 2.01 2.00 1.99 1.98 1.98 1.97 1.97 1.96 1.95 1.94

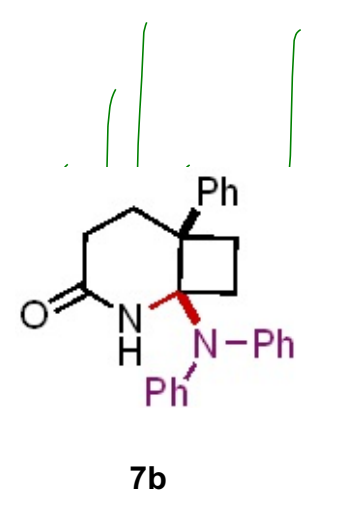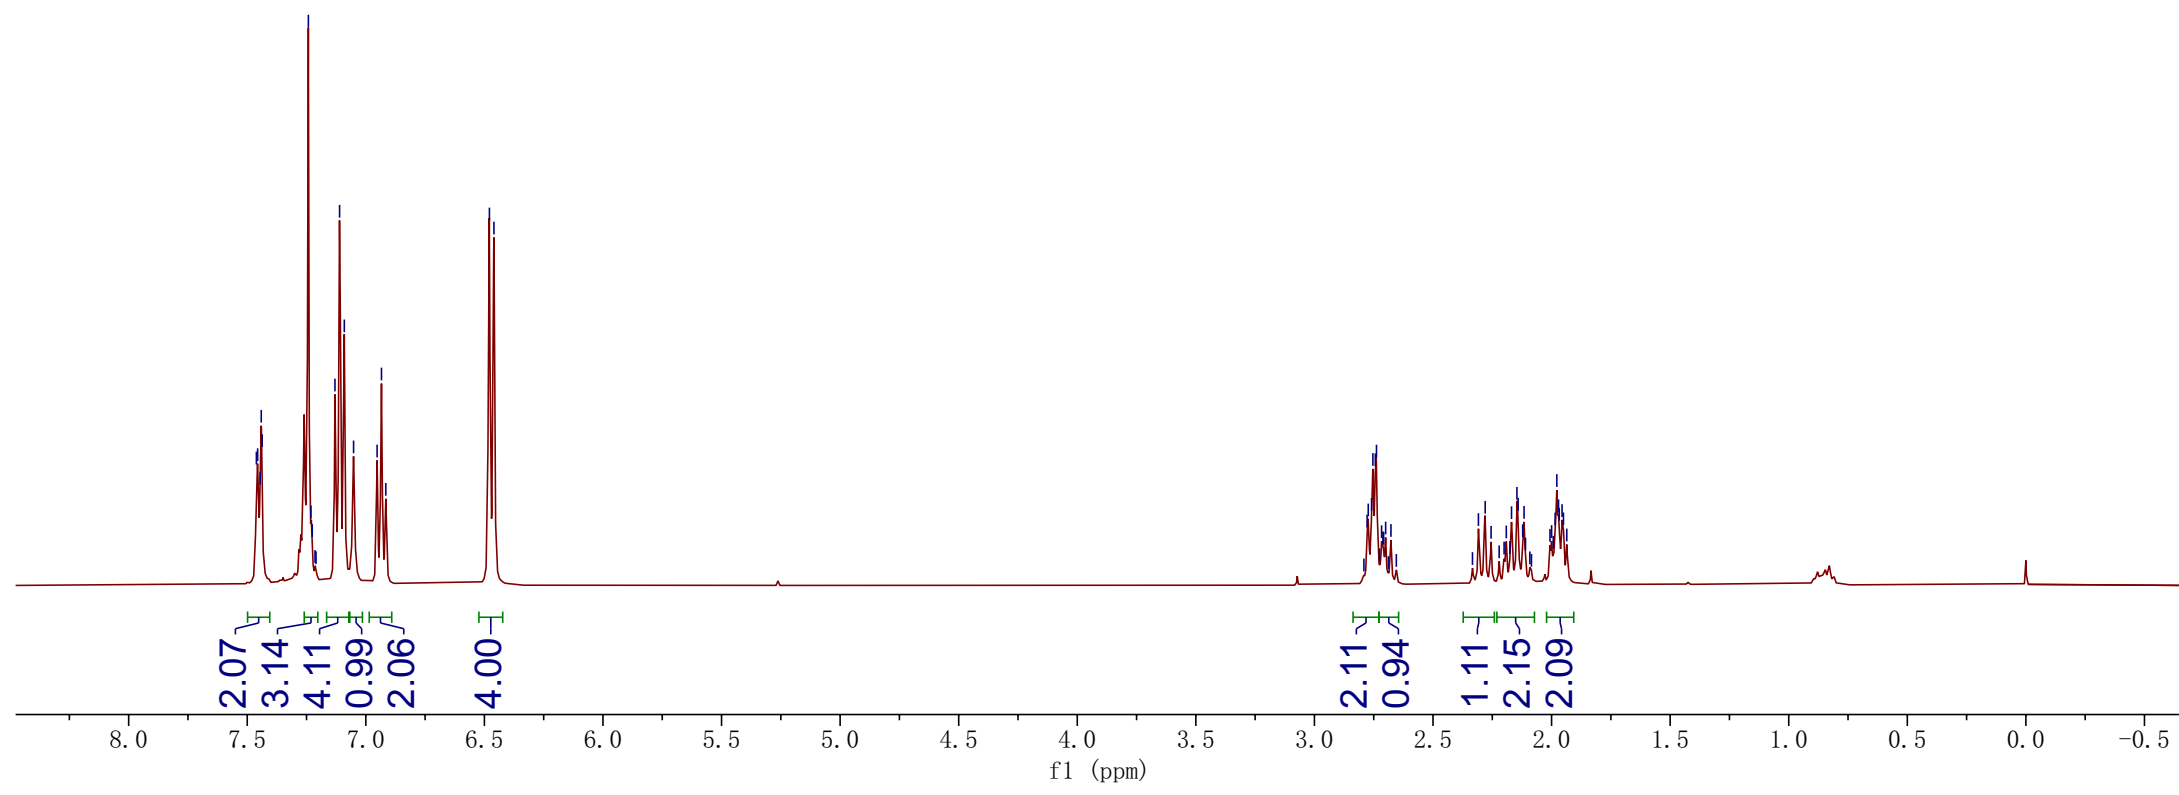

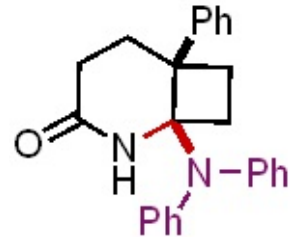

7b

-172.46

-144.93

-141.50

128.90

128.10

127.62

127.06

124.34

122.87

-77.89

-50.83

36.82

29.02

28.23

21.55

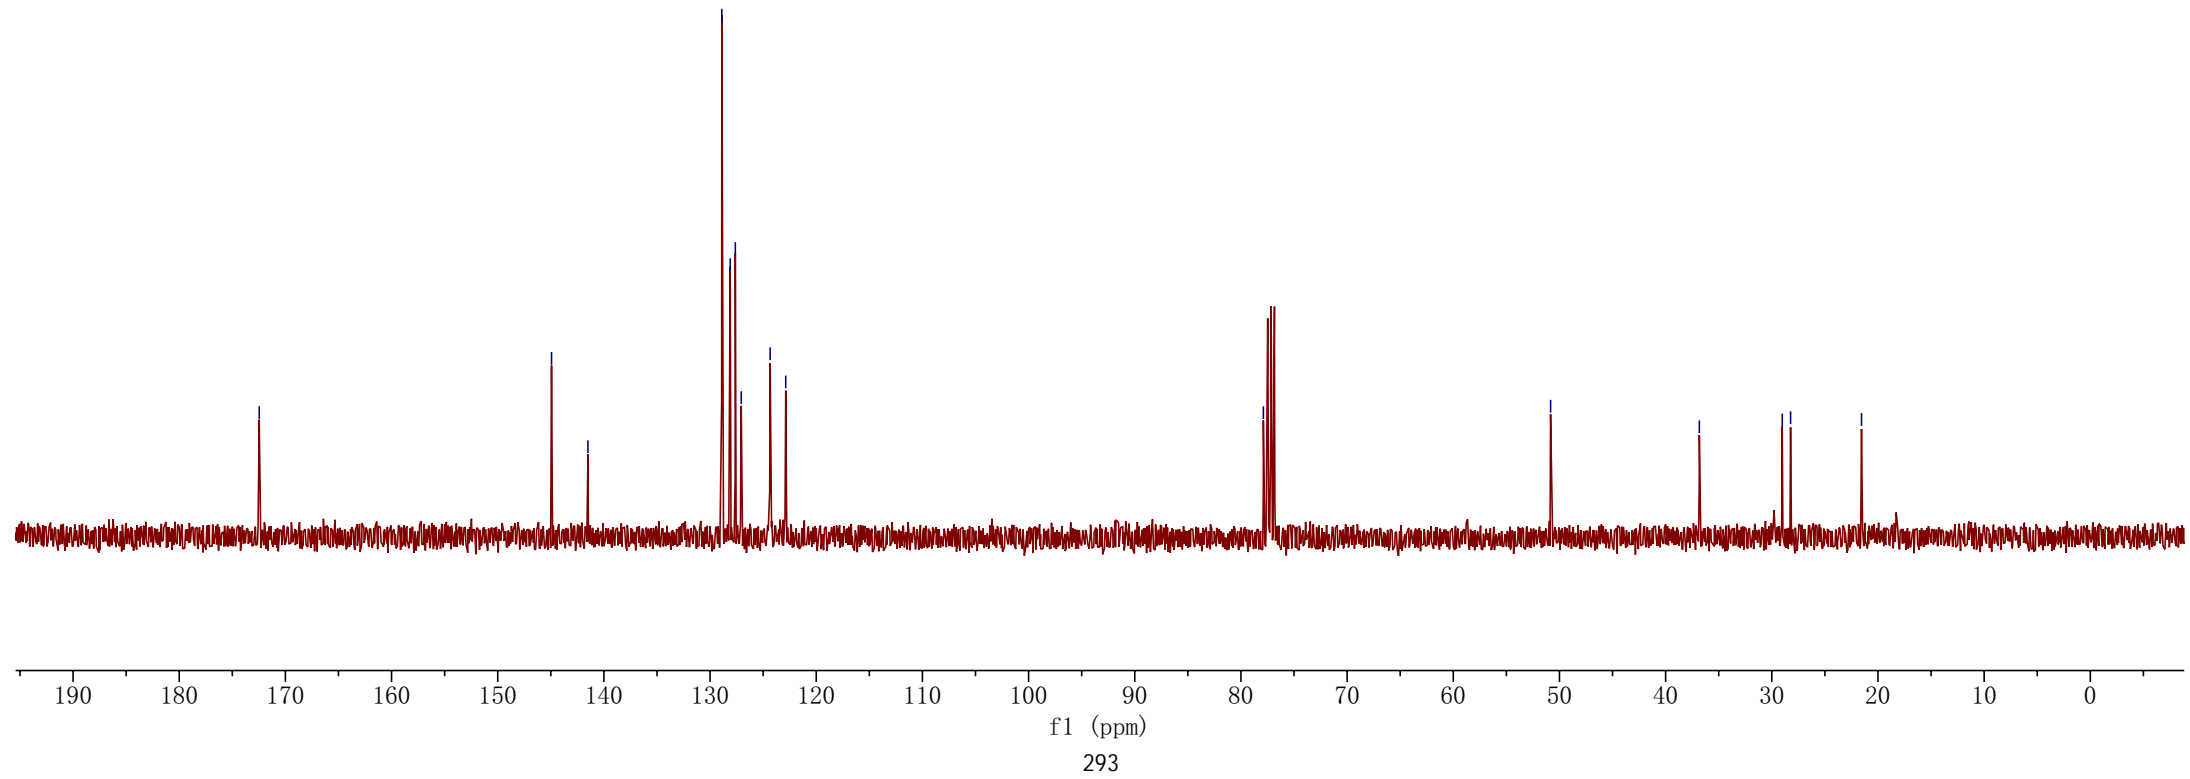

7.90 7.89 7.86 7.87 7.59 7.57 7.39 7.38 7.36 7.34 7.33 7.31 7.29 6.88 6.86 6.84 6.72 6.70 6.50 3.27 3.24 3.01 2.85 2.84 2.82 2.82 2.80 2.79 2.78 2.77 2.60 2.59 2.57 2.56 2.52 2.52 2.51 2.49 2.17 2.16 2.14 2.13 2.13 2.12 2.11 2.10 2.10 2.09 1.92 1.88

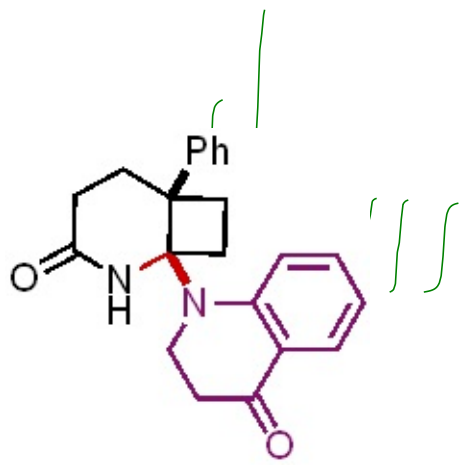

7c

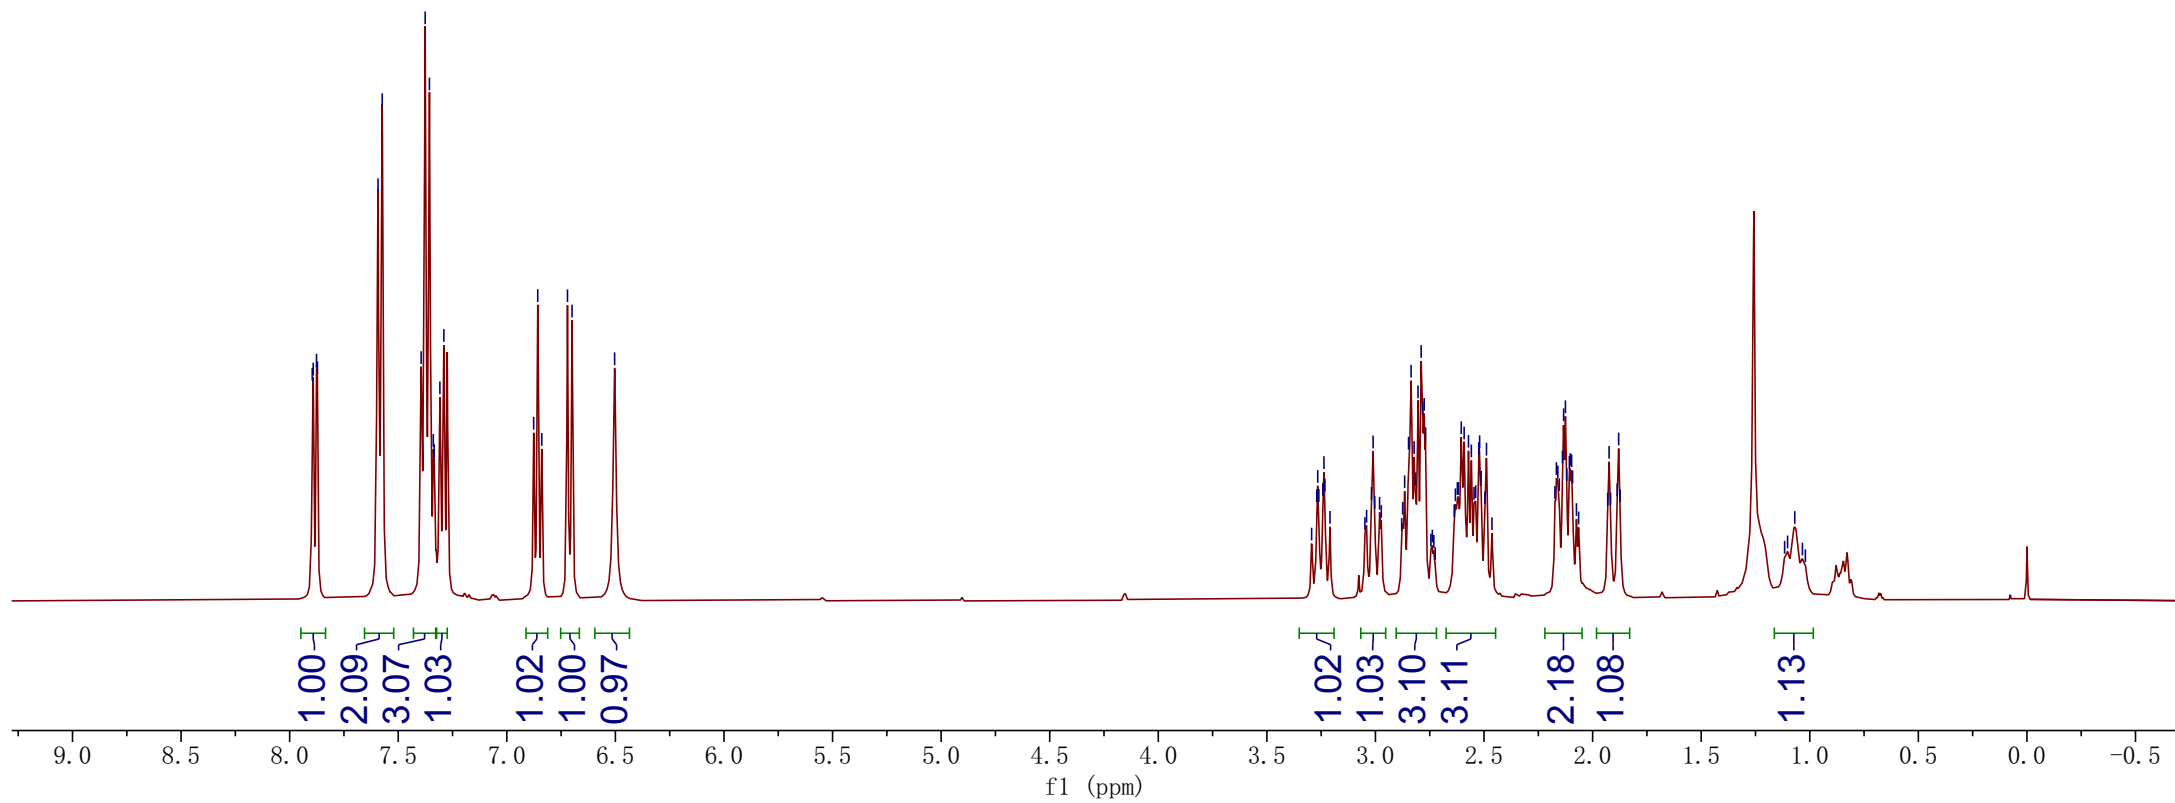

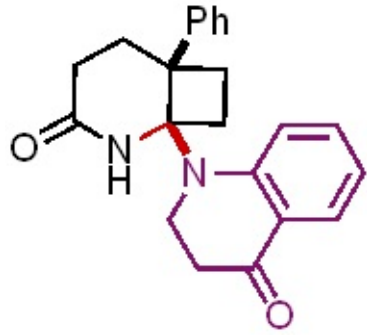

7c

—193.84  
—172.36

148.94  
143.03  
134.51  
129.38  
128.23  
127.47  
127.38  
122.85  
119.49  
114.72

—78.09

47.96  
45.14  
38.70  
37.71  
28.52  
26.80  
26.11

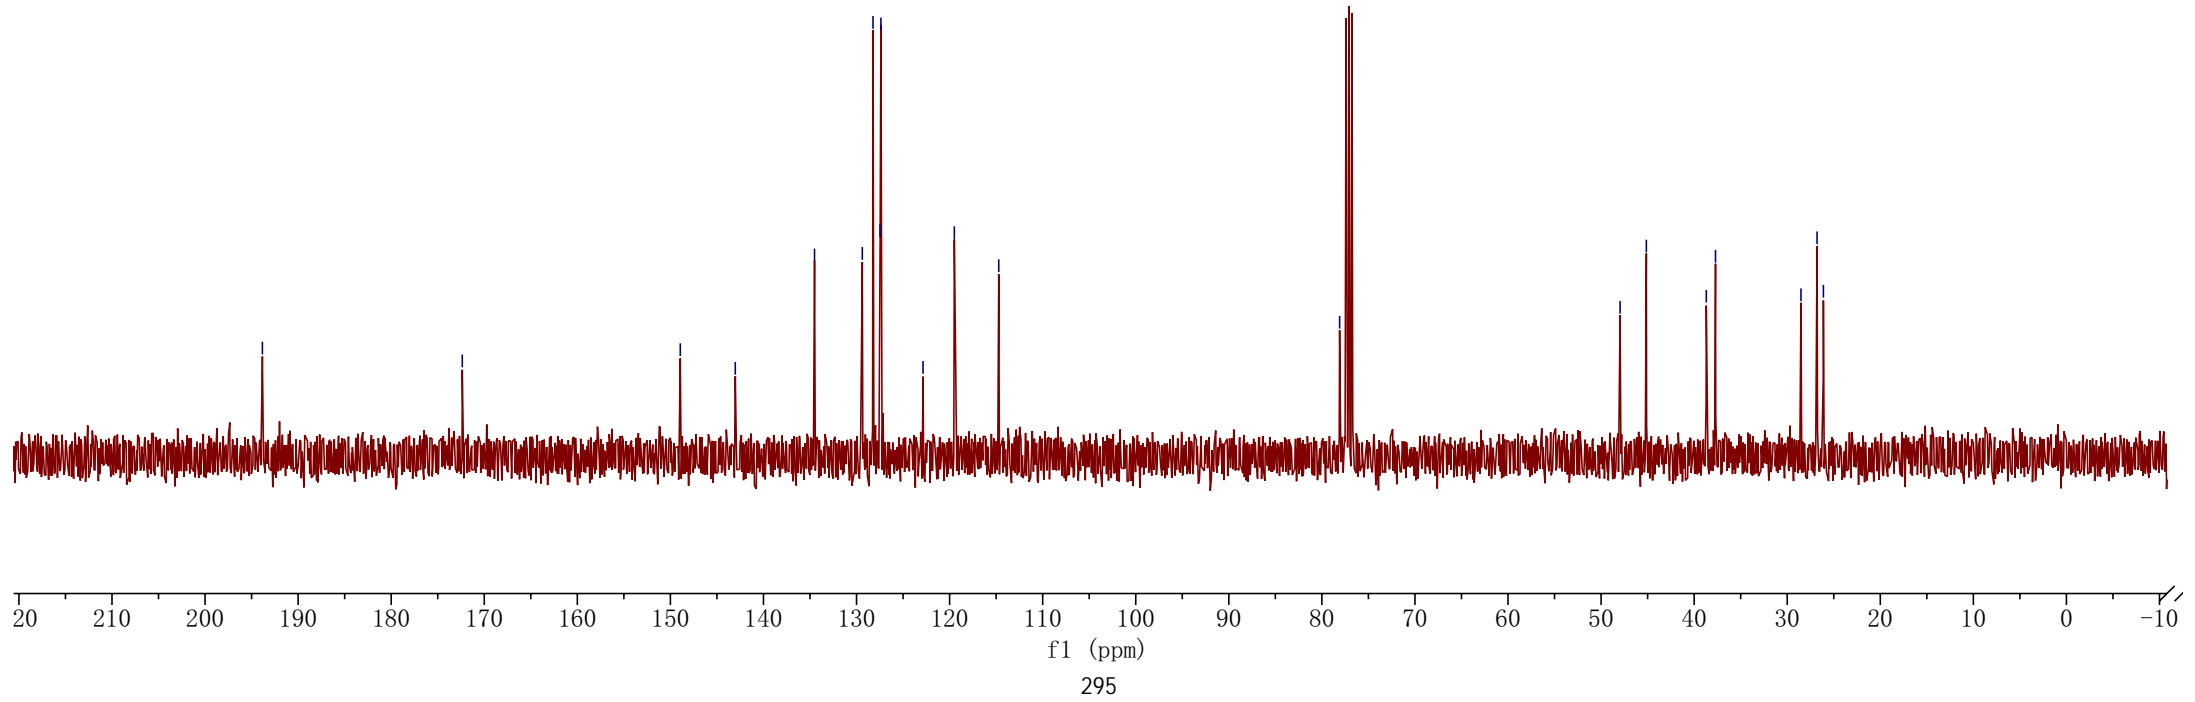

7.59  
7.57  
7.36  
7.35  
7.33  
7.29  
7.27  
6.77  
6.75  
6.74  
6.73  
6.73  
6.67  
6.66  
6.66  
6.65  
6.52  
3.70  
3.67  
3.31  
3.29  
2.94  
2.81  
2.79  
2.77  
2.76  
2.75  
2.75  
2.74  
2.73  
2.58  
2.57  
2.56  
2.50  
2.50  
2.48  
2.47  
2.45  
2.43  
2.34  
2.31  
2.16  
2.16  
2.15  
2.14  
2.13  
2.12  
2.11  
2.06  
2.05  
2.05

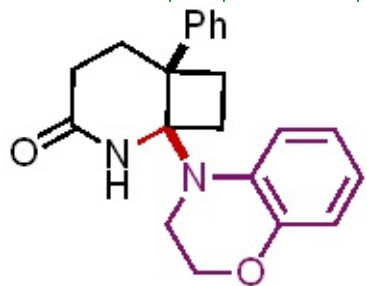

7d

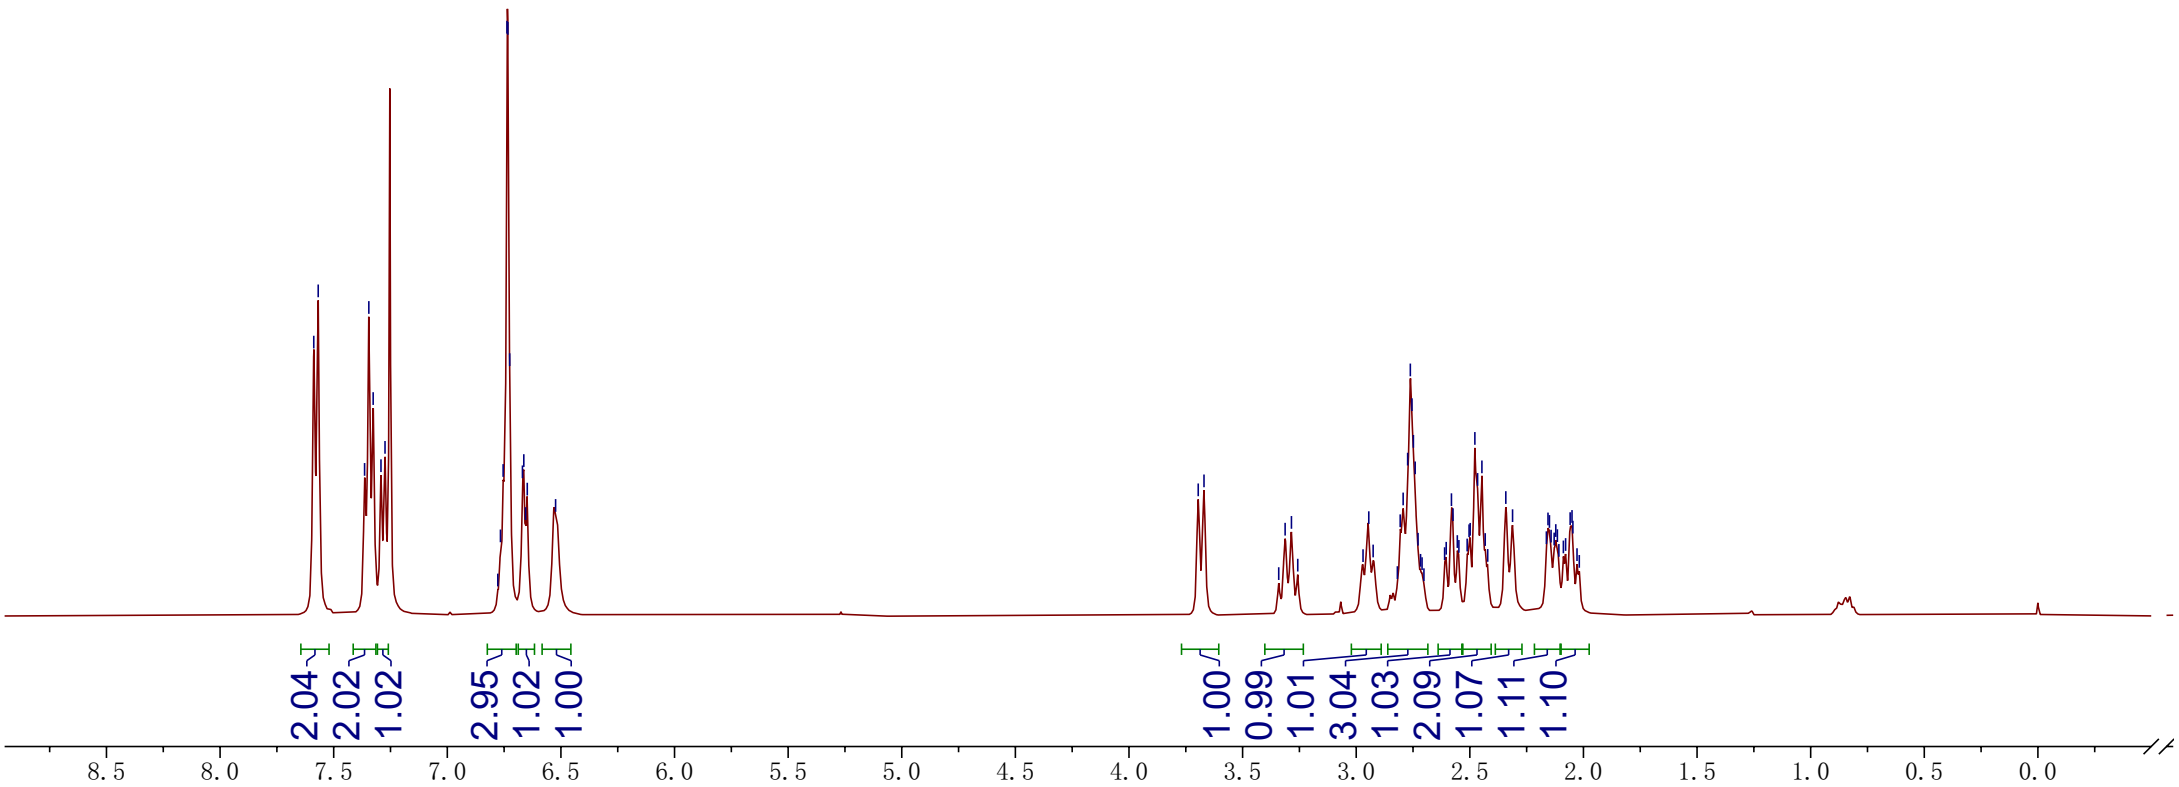

f1 (ppm)

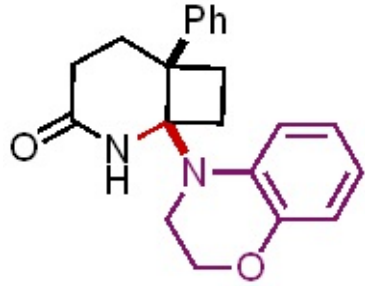

7d

—172.42

~145.98

~143.05

131.60

128.00

127.17

127.10

120.51

120.15

116.98

114.29

—77.71

—65.51

~47.57

~40.80

~38.20

~28.59

~27.12

~26.50

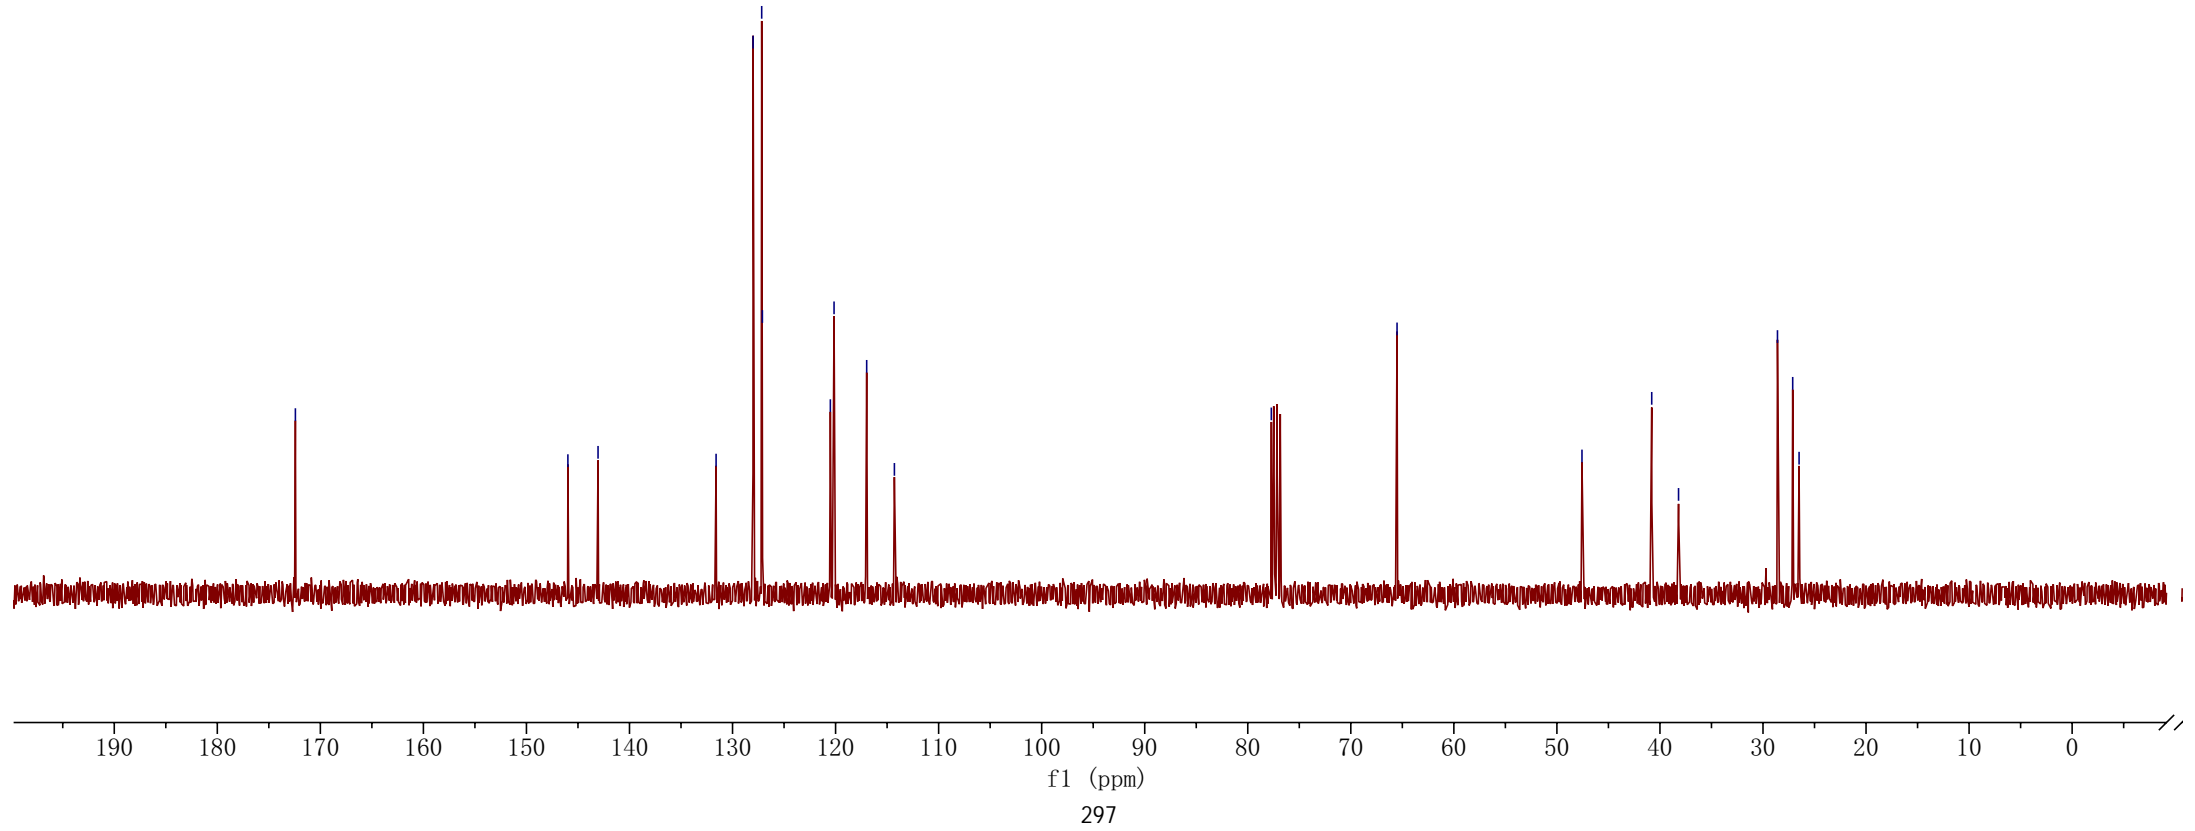

7.76 7.48 7.46 7.44 7.38 7.36 7.34 7.26 7.25 7.25 7.23 7.21 6.81 4.80 2.67 2.65 2.64 2.63 2.62 2.60 2.57 2.55 2.53 2.53 2.52 2.51 2.50 2.50 2.47 2.46 2.45 2.41 2.39 2.39 2.37 2.36 2.35 2.34 2.22 2.20 2.19 2.18 2.17 2.15 2.14 2.12 2.12 2.10 2.09 2.08 2.07

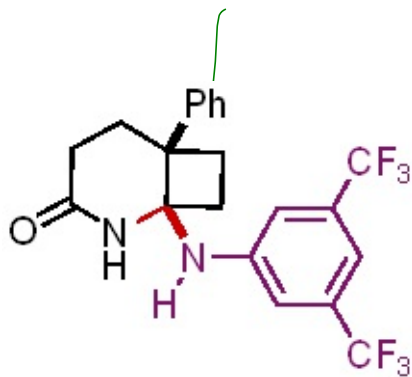

7e

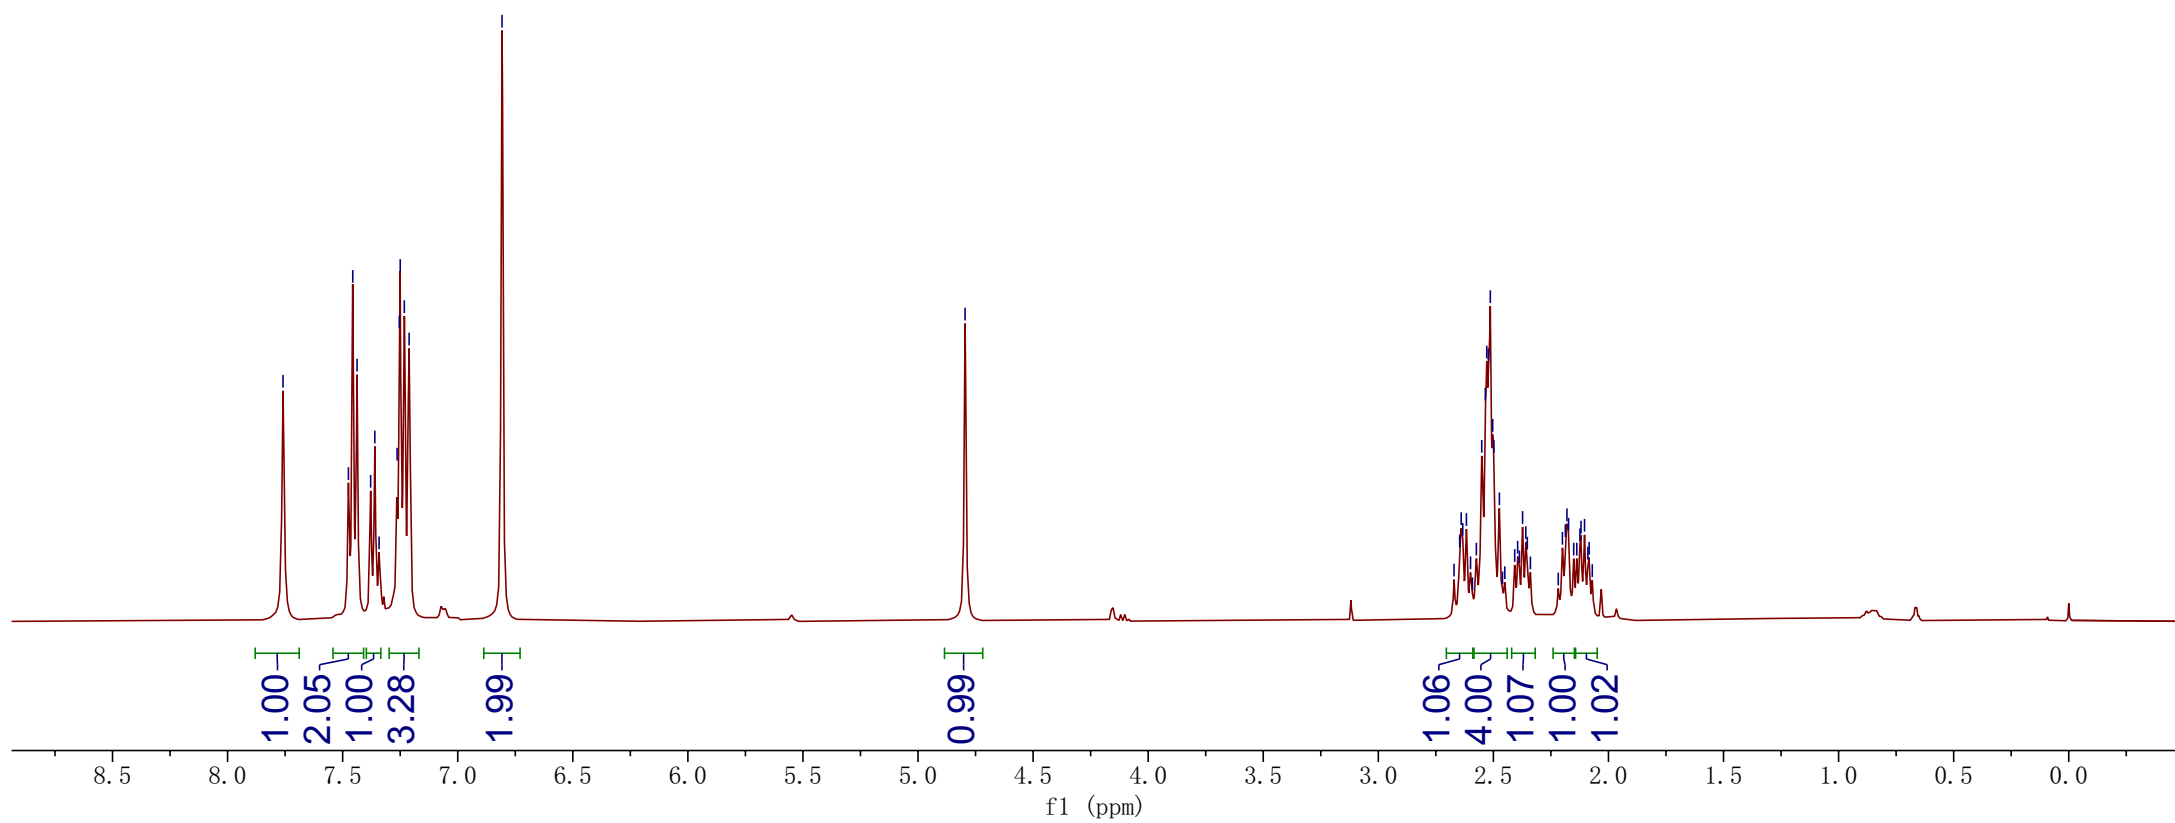

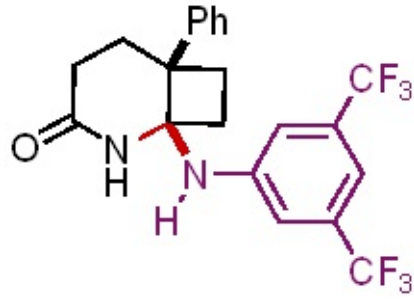

7e

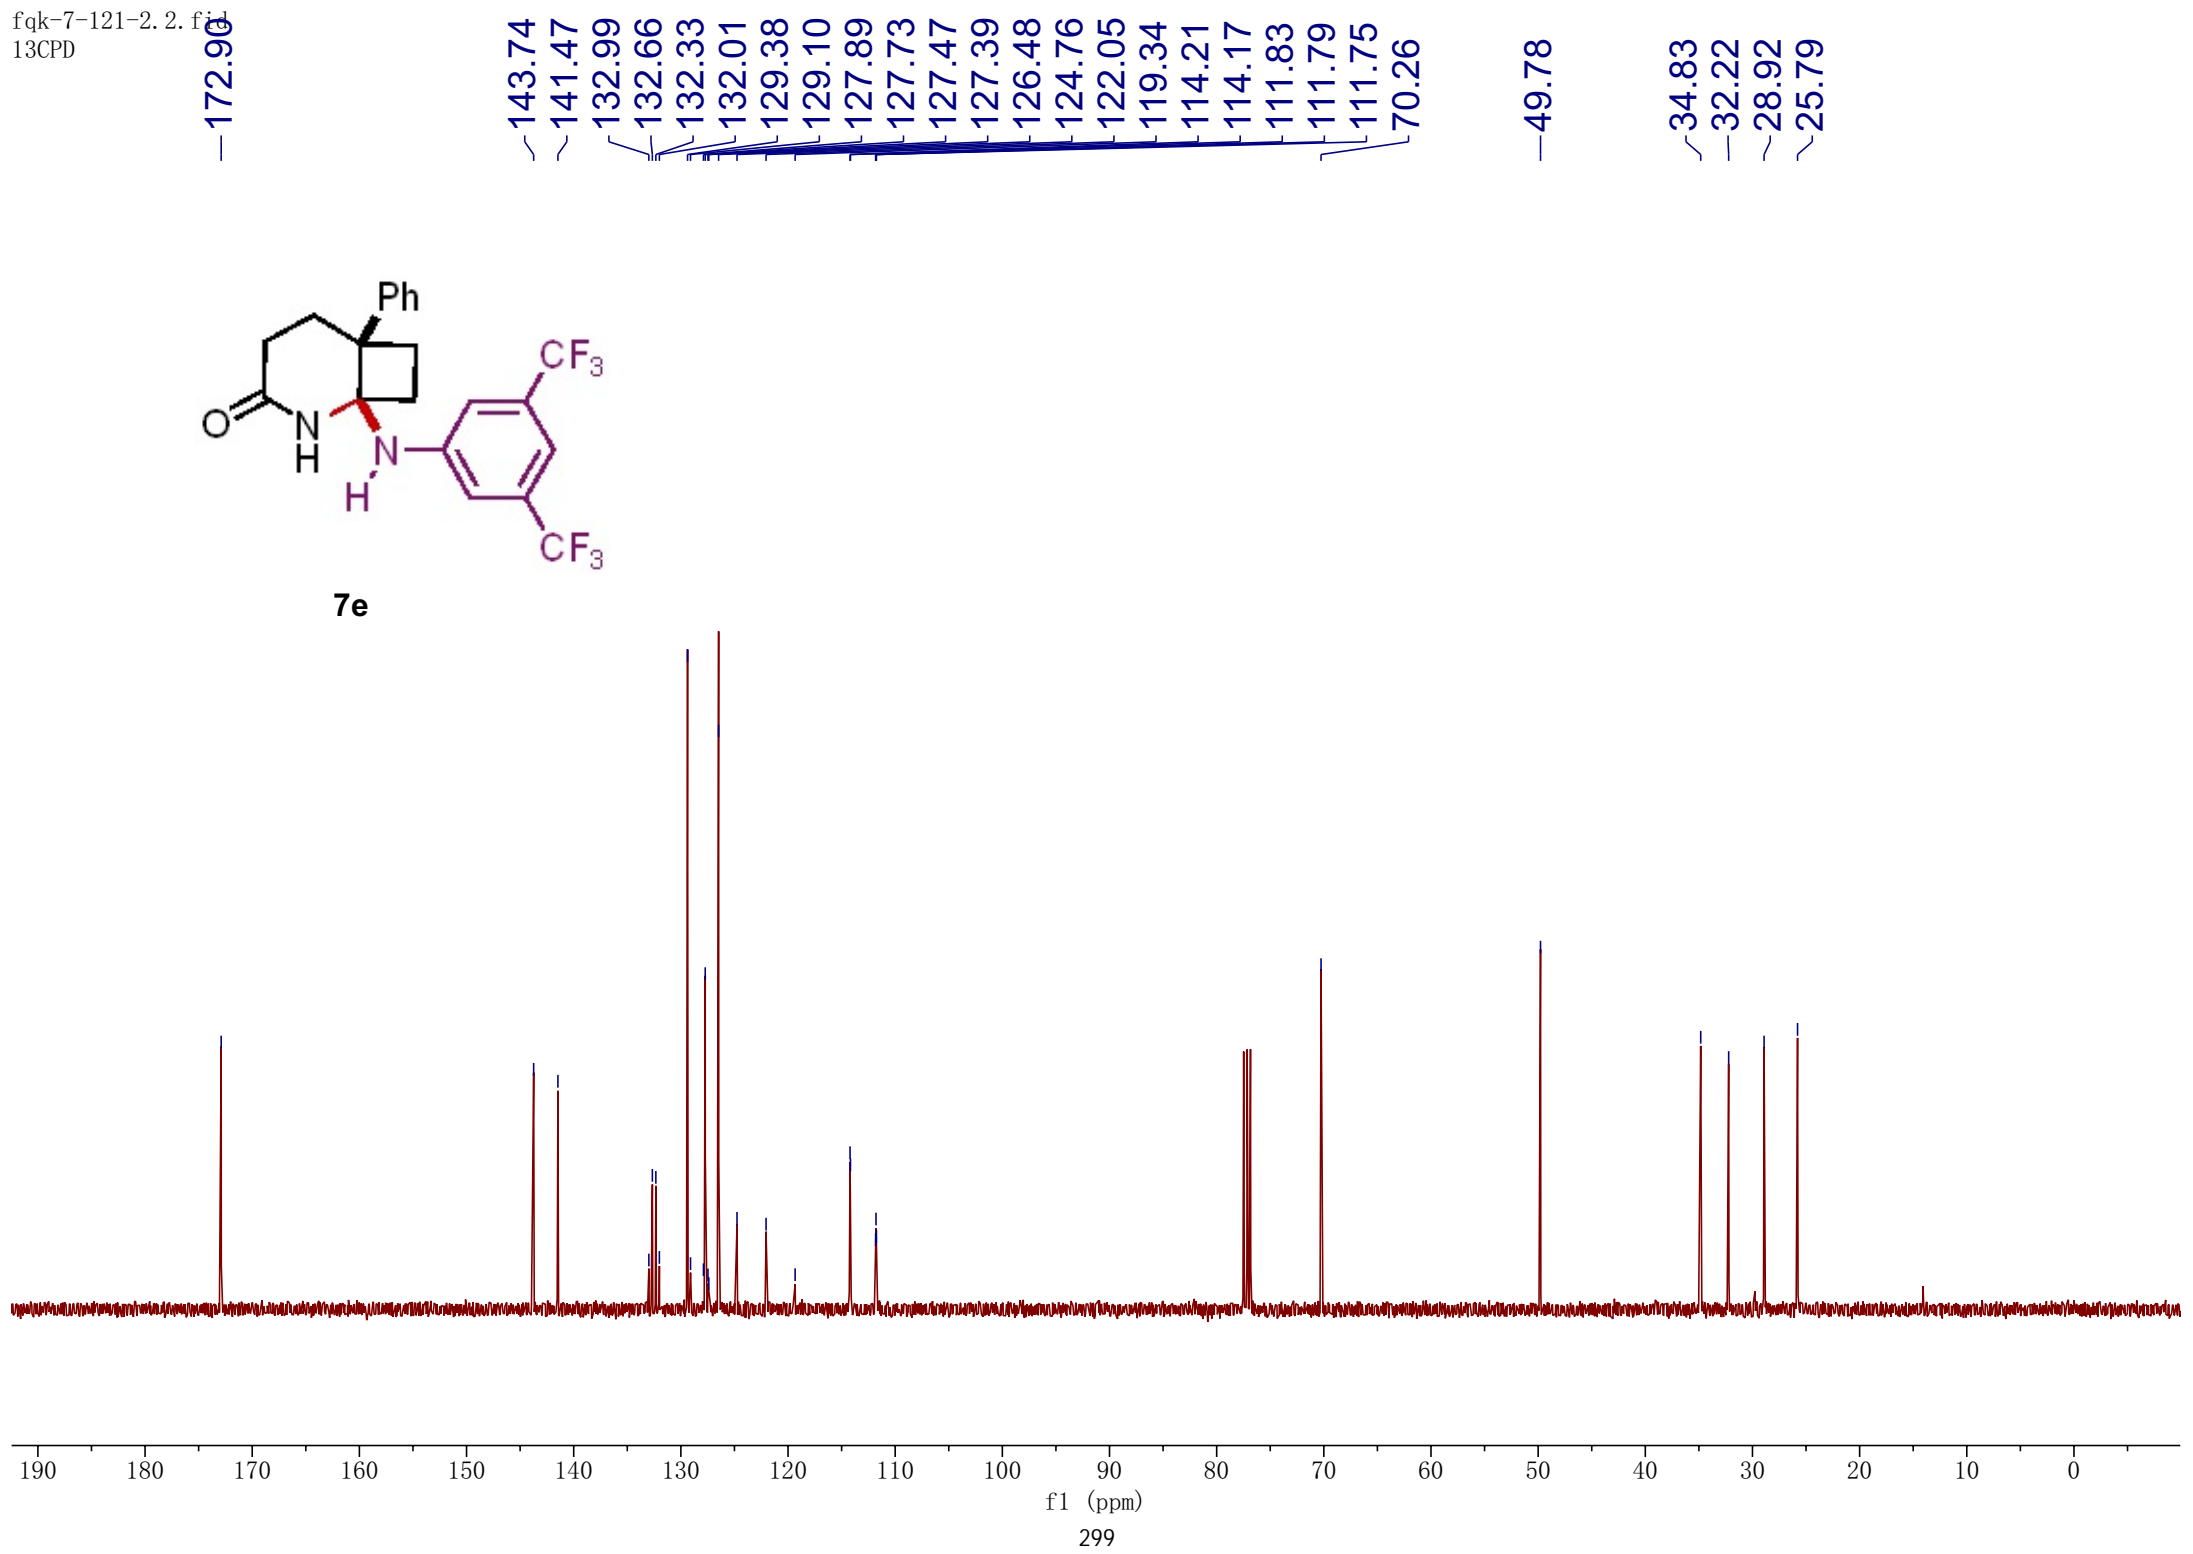

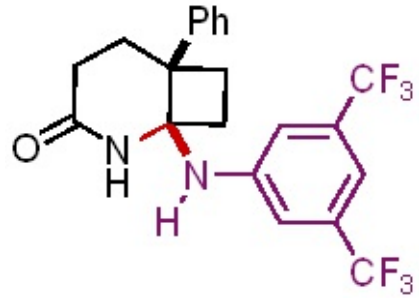

7e

63.12

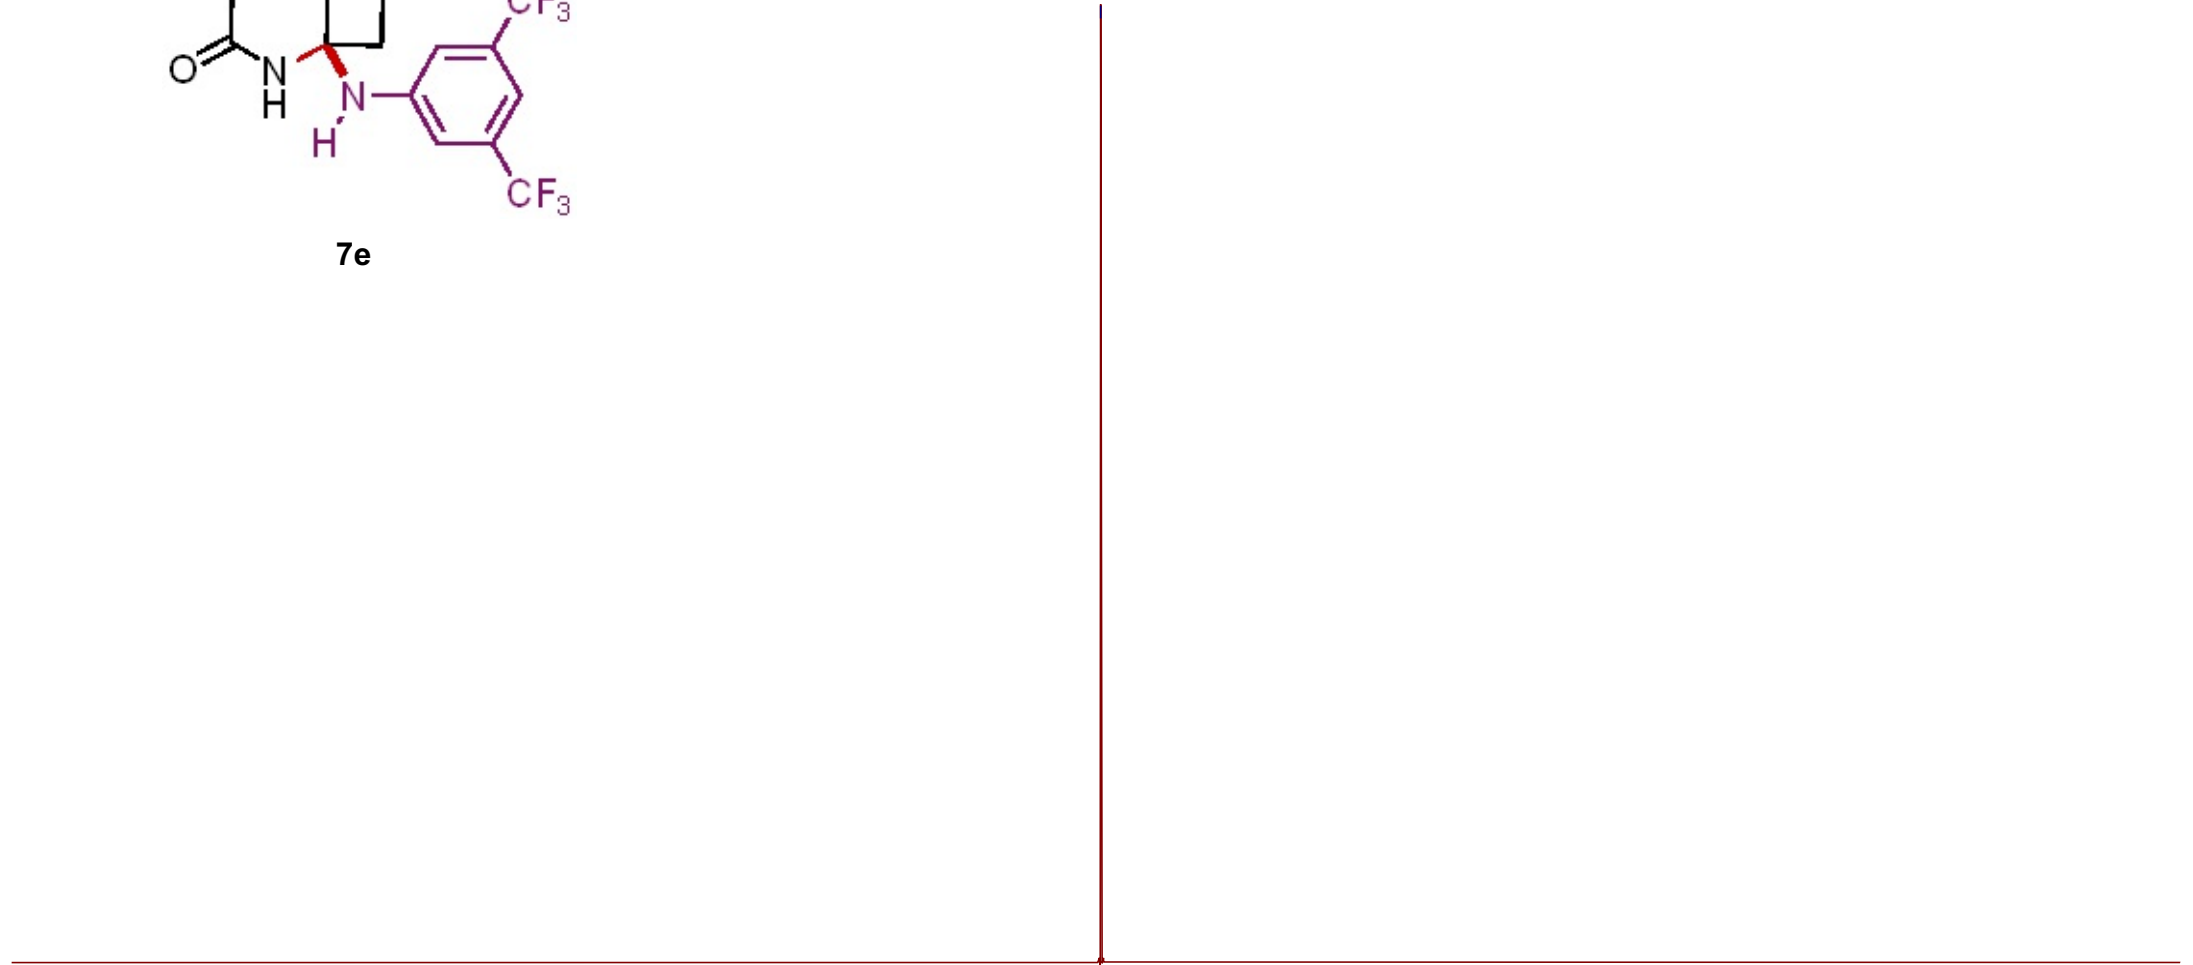

f1 (ppm)

300

7.47 7.45 7.43 7.39 7.37 7.37 7.36 7.34 7.23 7.21 6.79 6.47 6.45 4.63 2.69 2.69 2.68 2.67 2.66 2.66 2.58 2.57 2.56 2.55 2.54 2.53 2.51 2.50 2.49 2.48 2.45 2.43 2.42 2.41 2.40 2.38 2.38 2.36 2.18 2.17 2.17 2.16 2.15 2.15 2.14 2.12 2.10 2.10 2.08 2.07 2.06

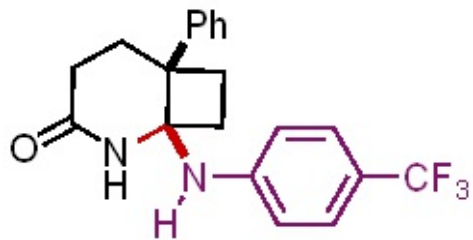

7f

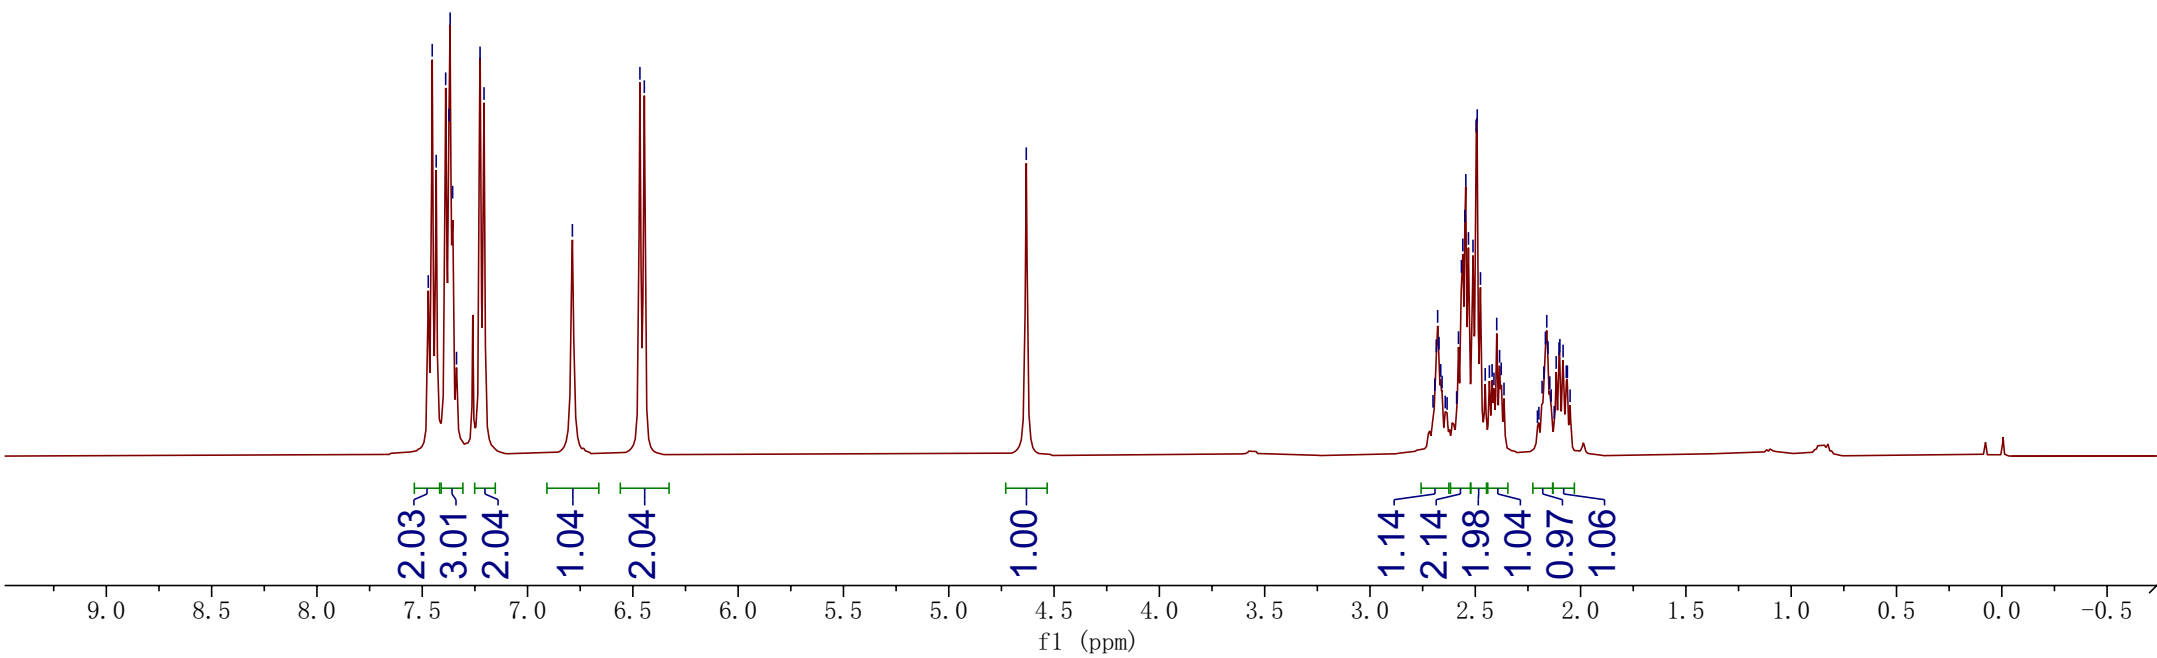

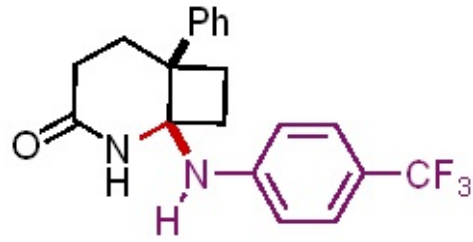

7f

- 172.23
- 145.30
- 141.56
- 129.33
- 128.69
- 127.62
- 126.92
- 126.89
- 126.85
- 126.81
- 126.45
- 126.00
- 123.31
- 121.07
- 120.74
- 120.62
- 120.42
- 120.09
- 113.84
- 70.17
- 49.57
- 34.98
- 32.49
- 28.98
- 25.91

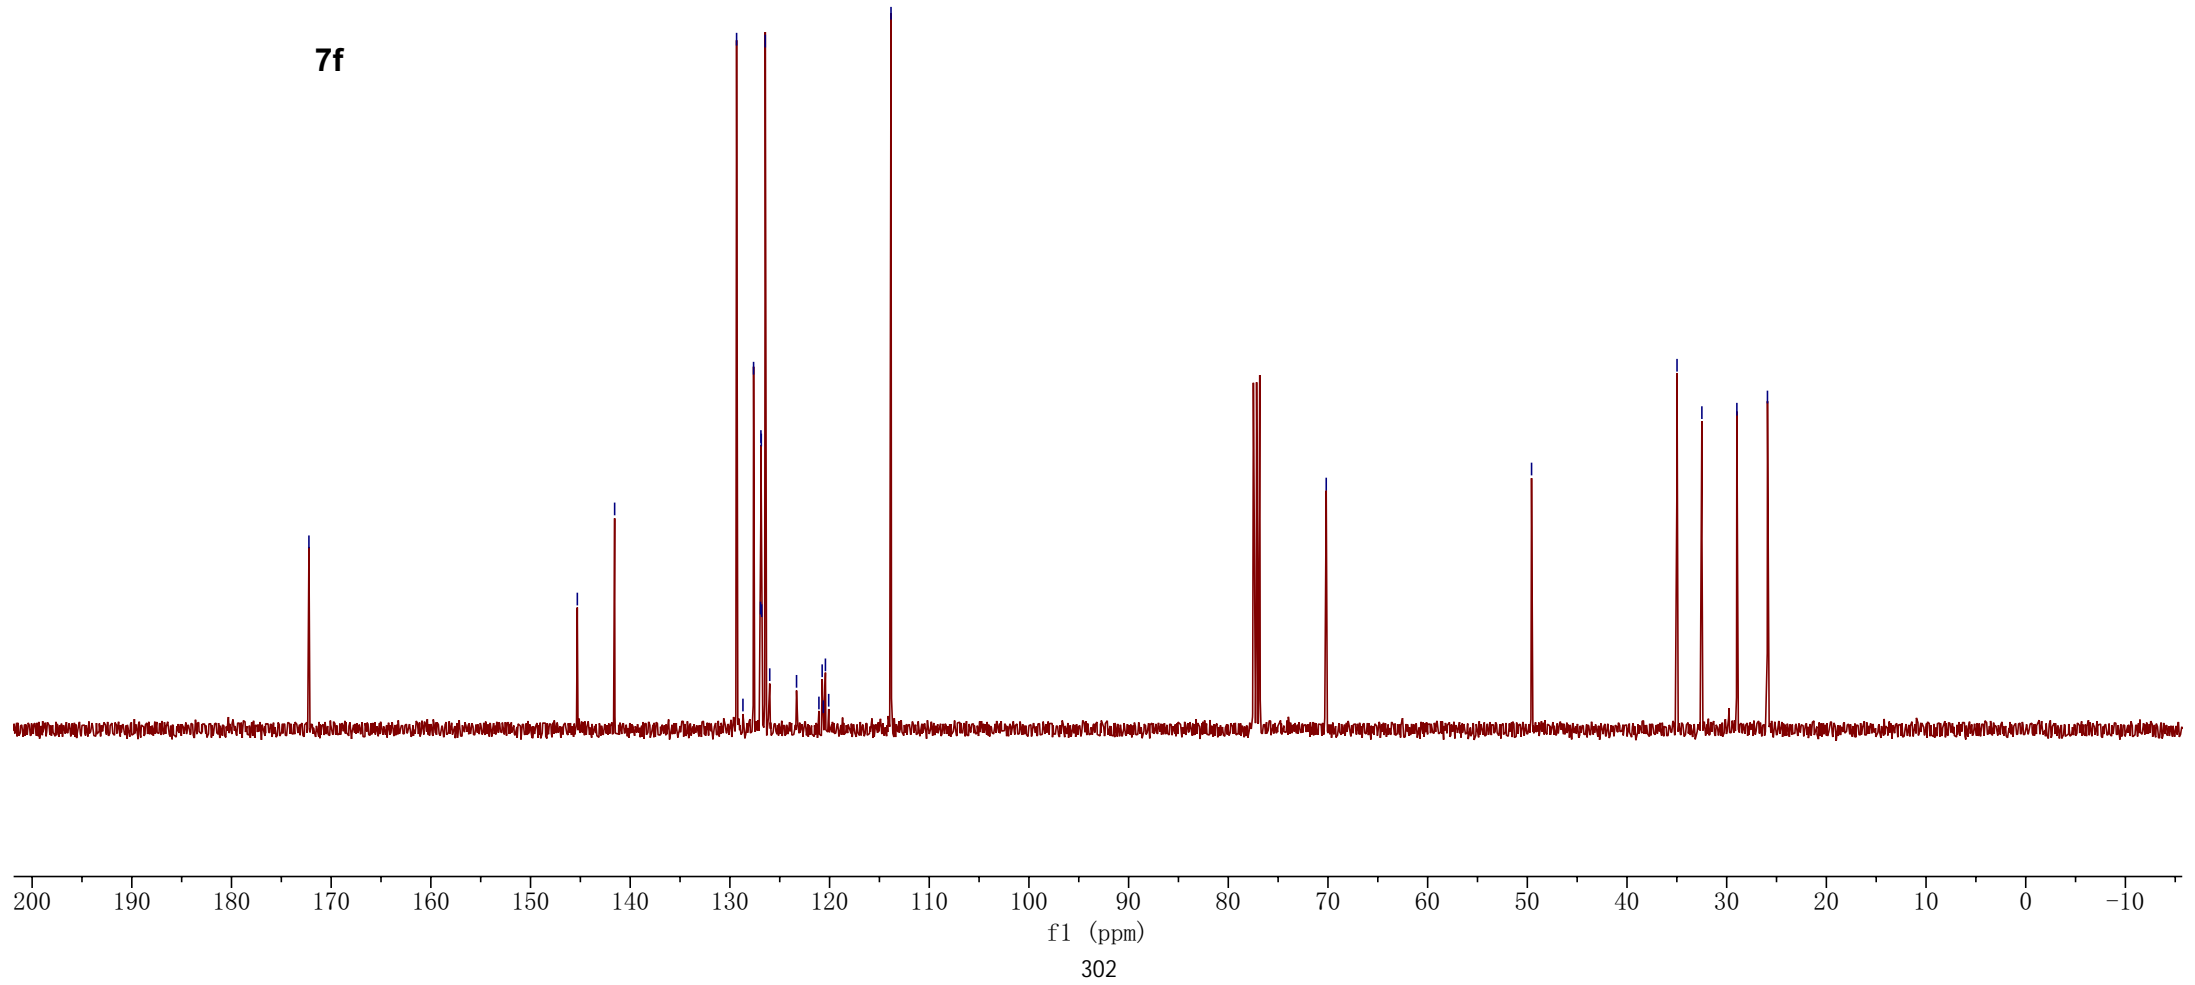

--61.32

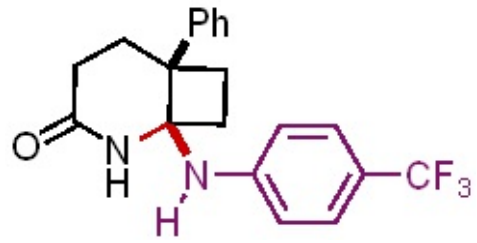

7f

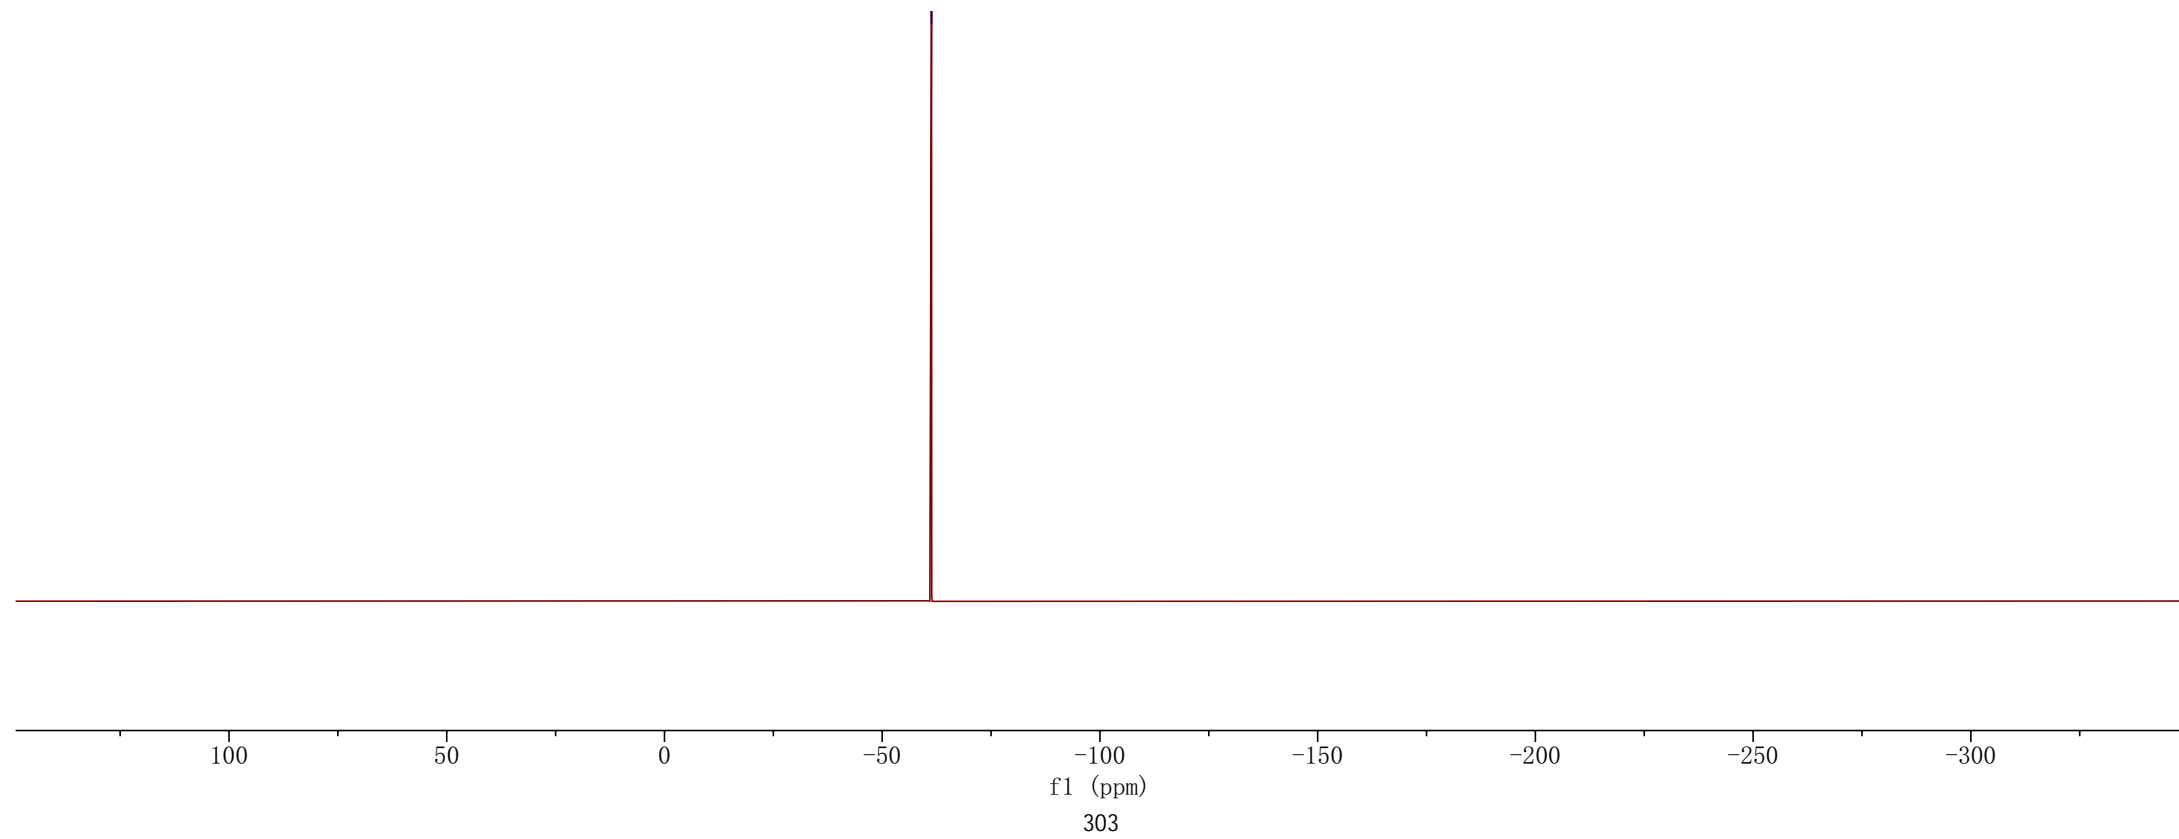

8.01  
7.96  
7.44  
7.43  
7.41  
7.35  
7.35  
7.34  
7.33  
7.33  
7.32  
7.31  
7.21  
7.19  
7.19  
7.11  
6.42  
6.40  
5.07  
2.65  
2.65  
2.64  
2.64  
2.62  
2.56  
2.55  
2.53  
2.53  
2.52  
2.51  
2.51  
2.50  
2.50  
2.48  
2.48  
2.46  
2.39  
2.37  
2.36  
2.35  
2.20  
2.18  
2.18  
2.17  
2.17  
2.15  
2.10  
2.10  
2.09  
2.08  
2.07

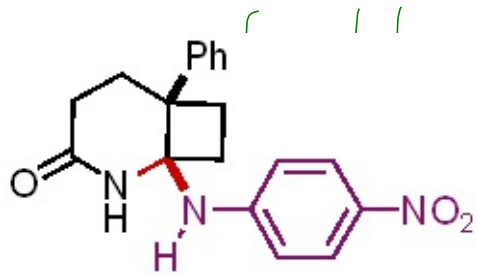

7g

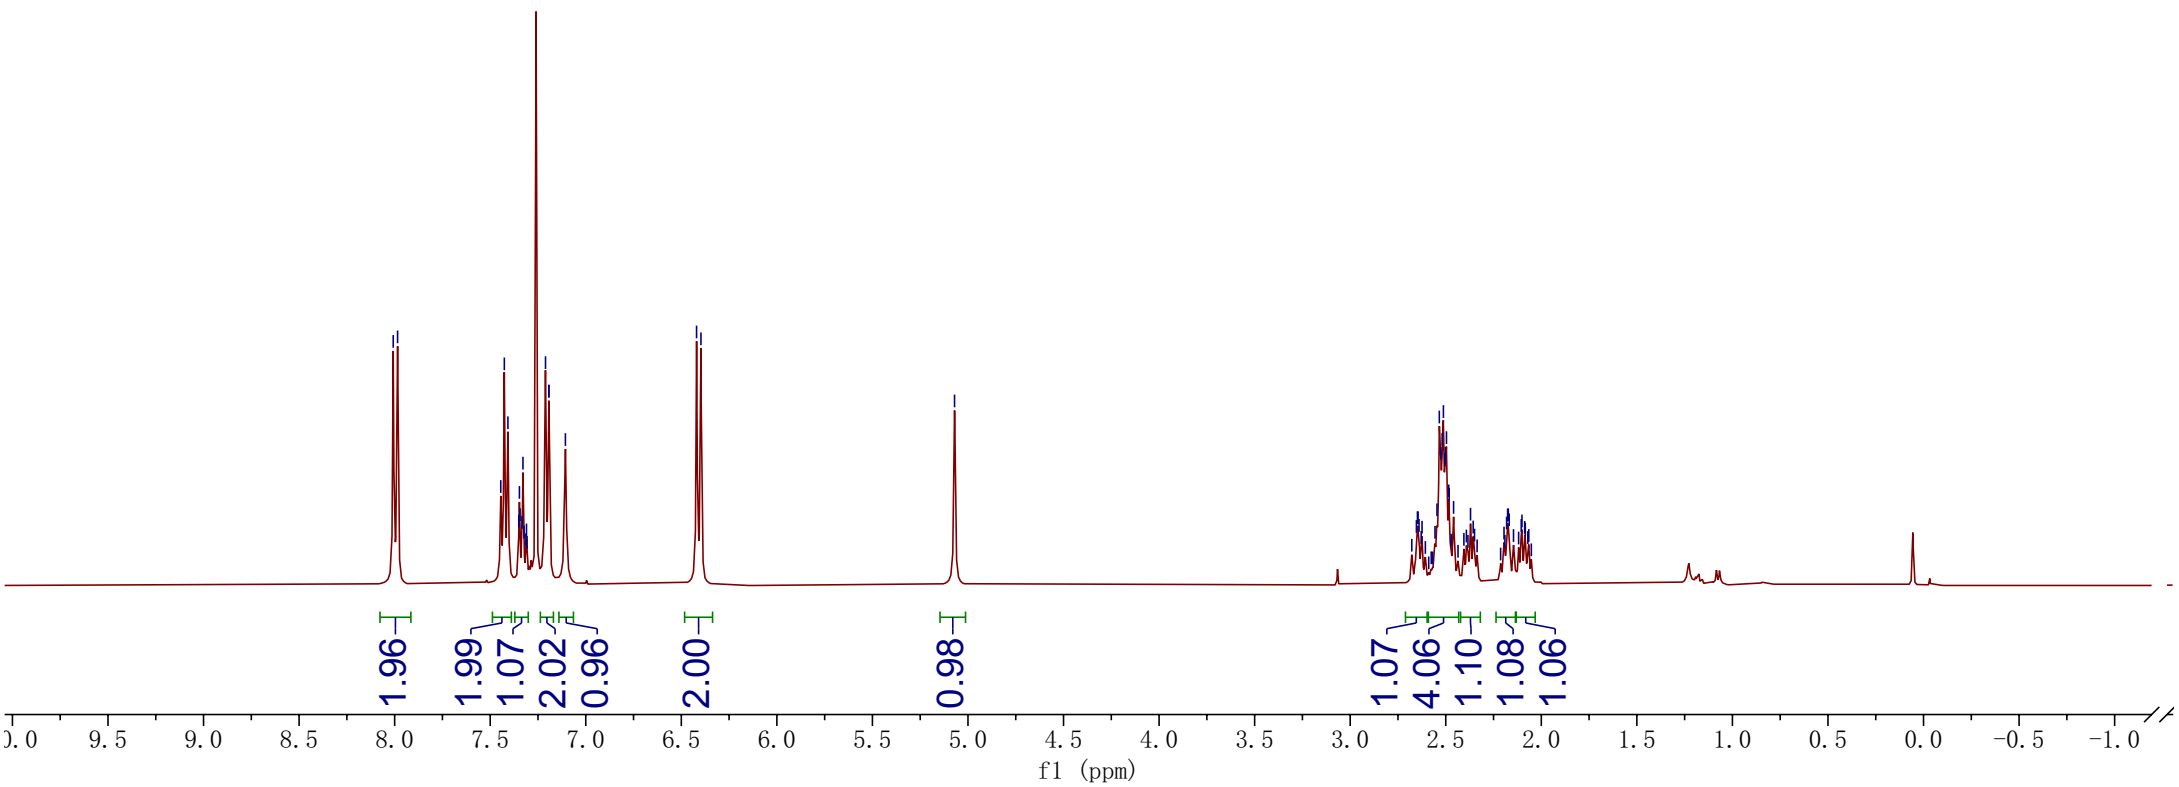

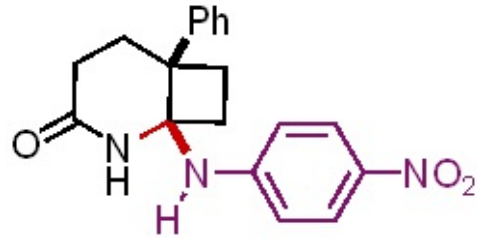

7g

—172.32

—148.31

—141.02

—139.27

—129.33

—127.72

—126.39

—126.04

—113.37

—70.07

—49.56

—34.64

—32.59

—28.84

—25.75

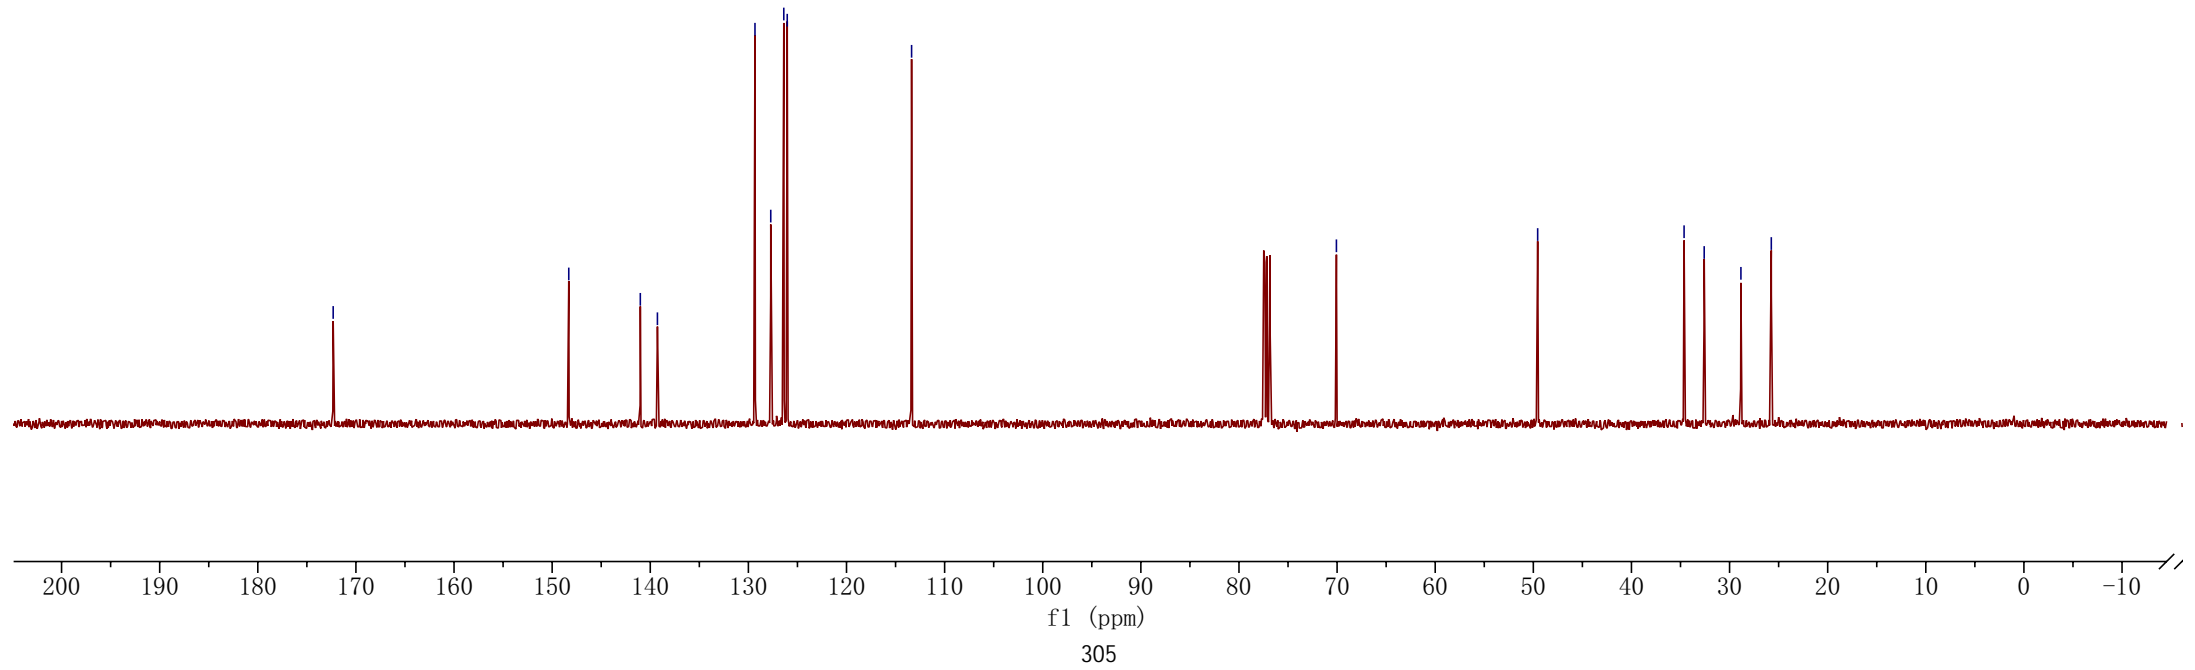

7-158-1.fid

7.82, 7.81, 7.80, 7.79, 7.44, 7.43, 7.42, 7.41, 7.40, 7.39, 7.34, 7.33, 7.32, 7.31, 7.20, 7.19, 7.19, 7.17, 7.17, 6.39, 6.39, 6.37, 6.36, 4.70, 4.28, 4.27, 4.26, 4.26, 4.25, 4.24, 2.66, 2.66, 2.65, 2.53, 2.52, 2.52, 2.51, 2.50, 2.49, 2.48, 2.46, 2.45, 2.44, 2.13, 2.12, 1.33, 1.32, 1.31, 1.30, 1.29, 1.29

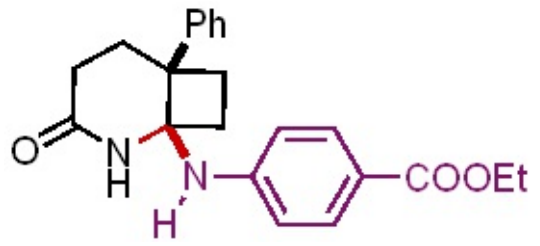

7h

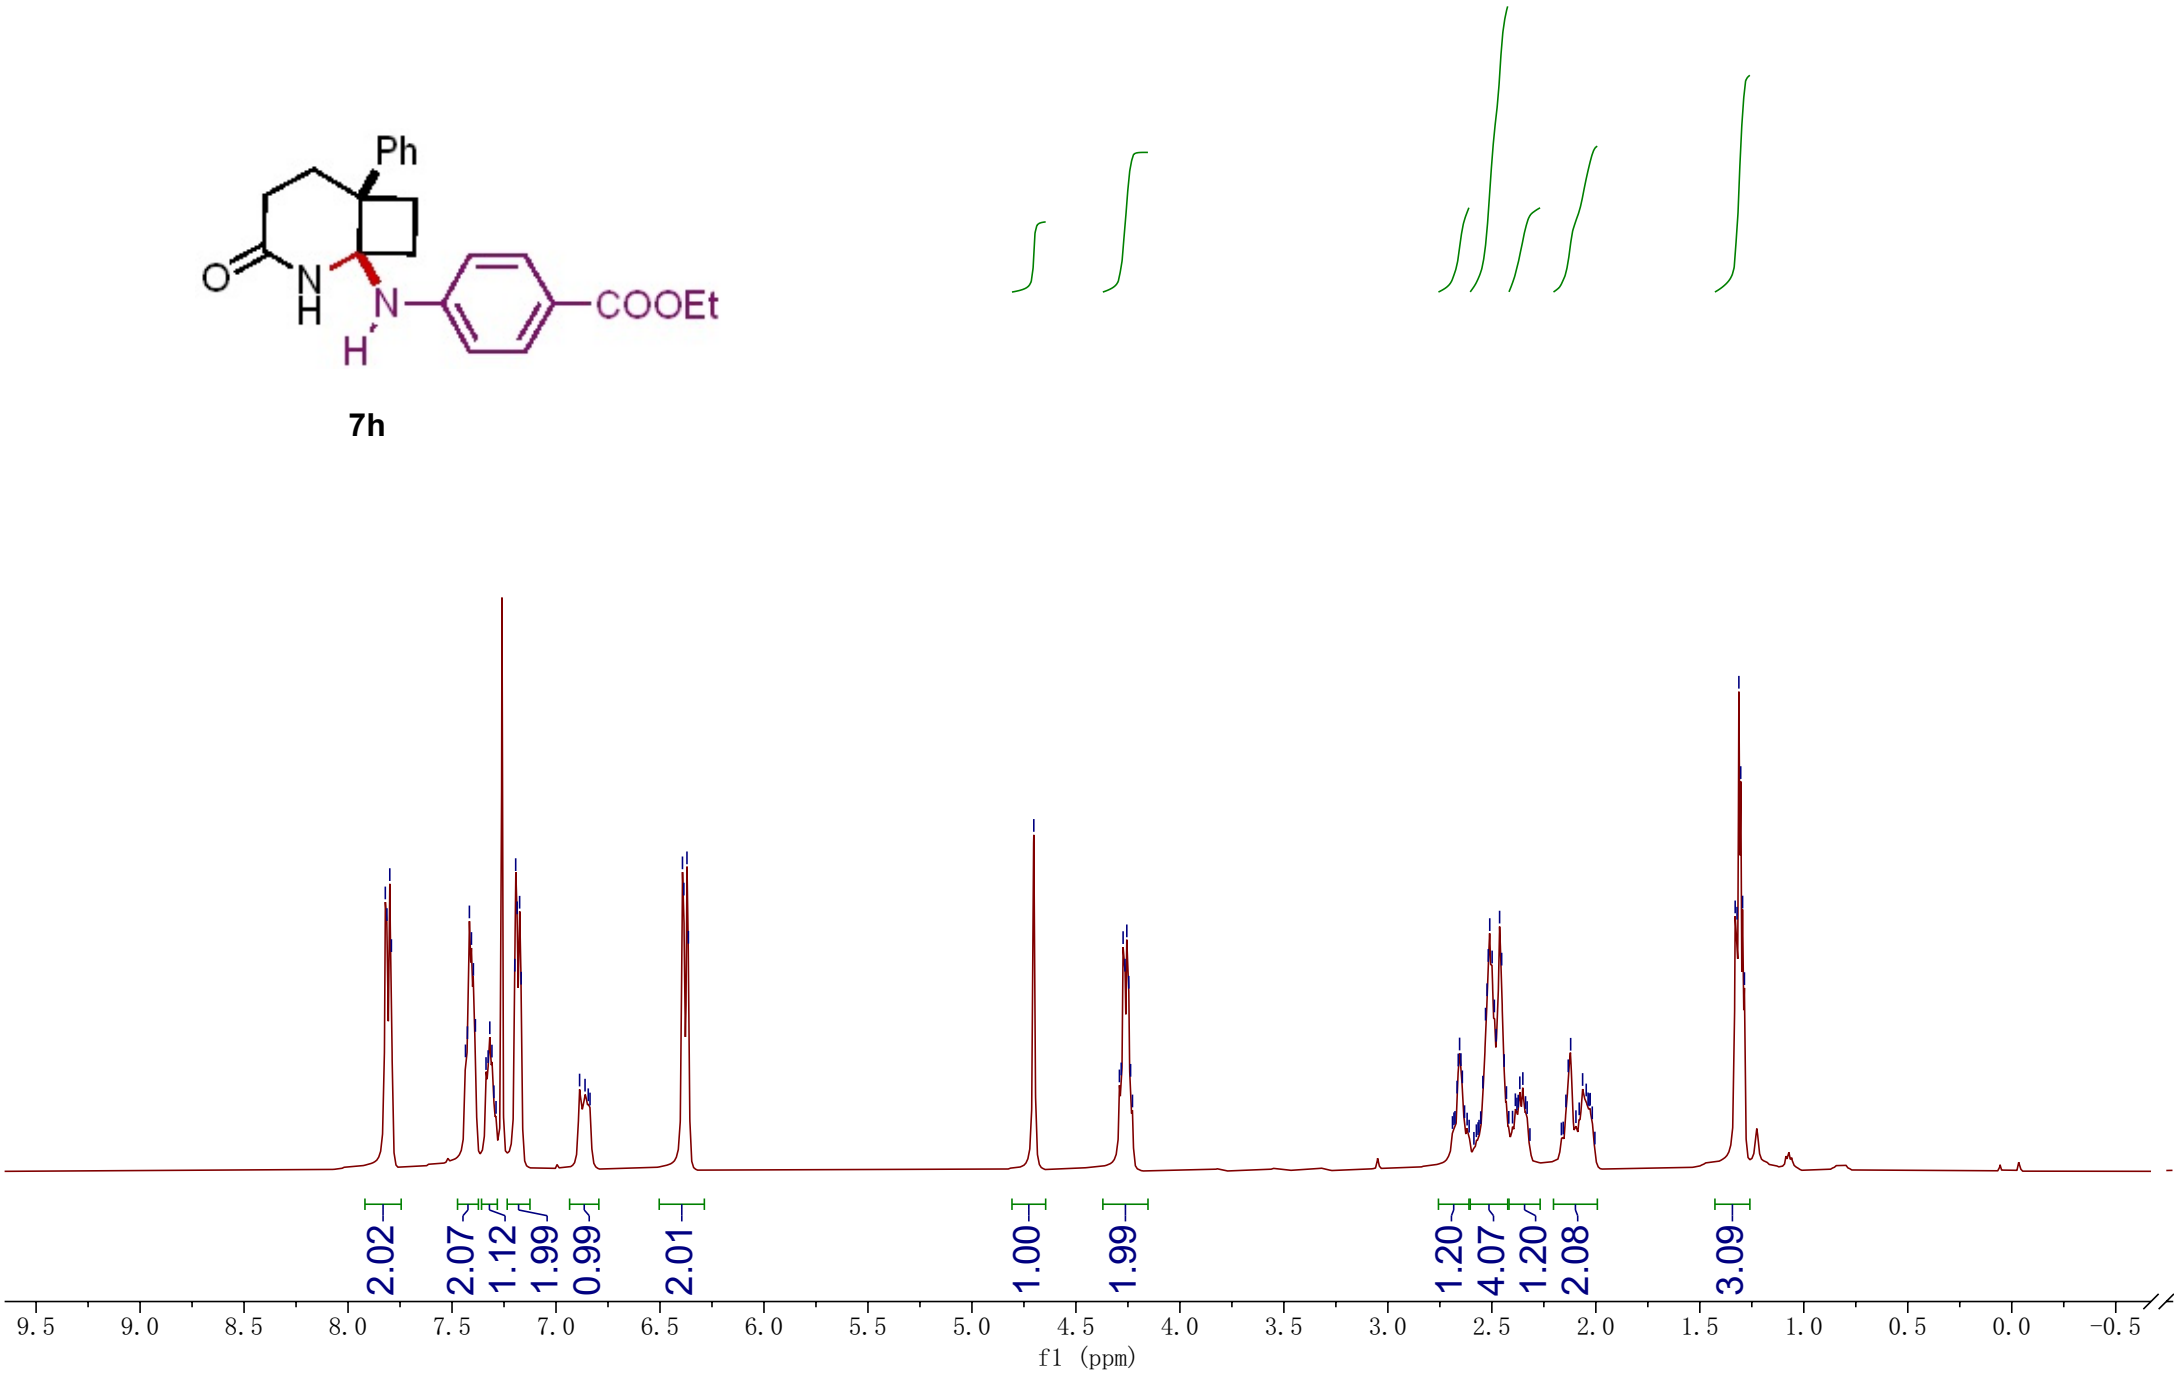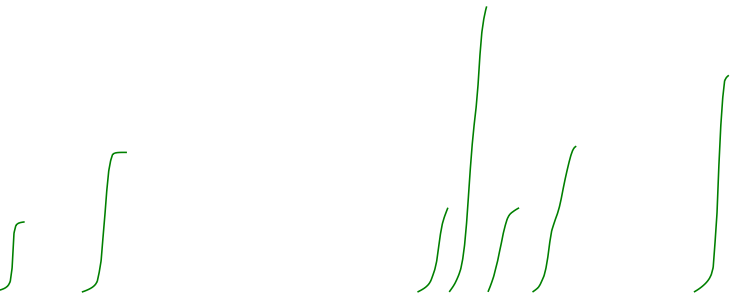

-172.10

-166.38

-146.40

-141.43

~131.46

~129.19

~127.48

~126.37

~120.43

~113.36

-70.04

-60.37

-49.43

~34.83

~32.46

~28.84

~25.81

-14.37

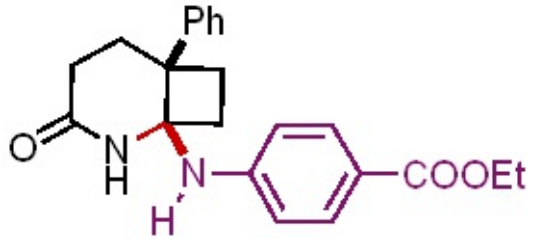

7h

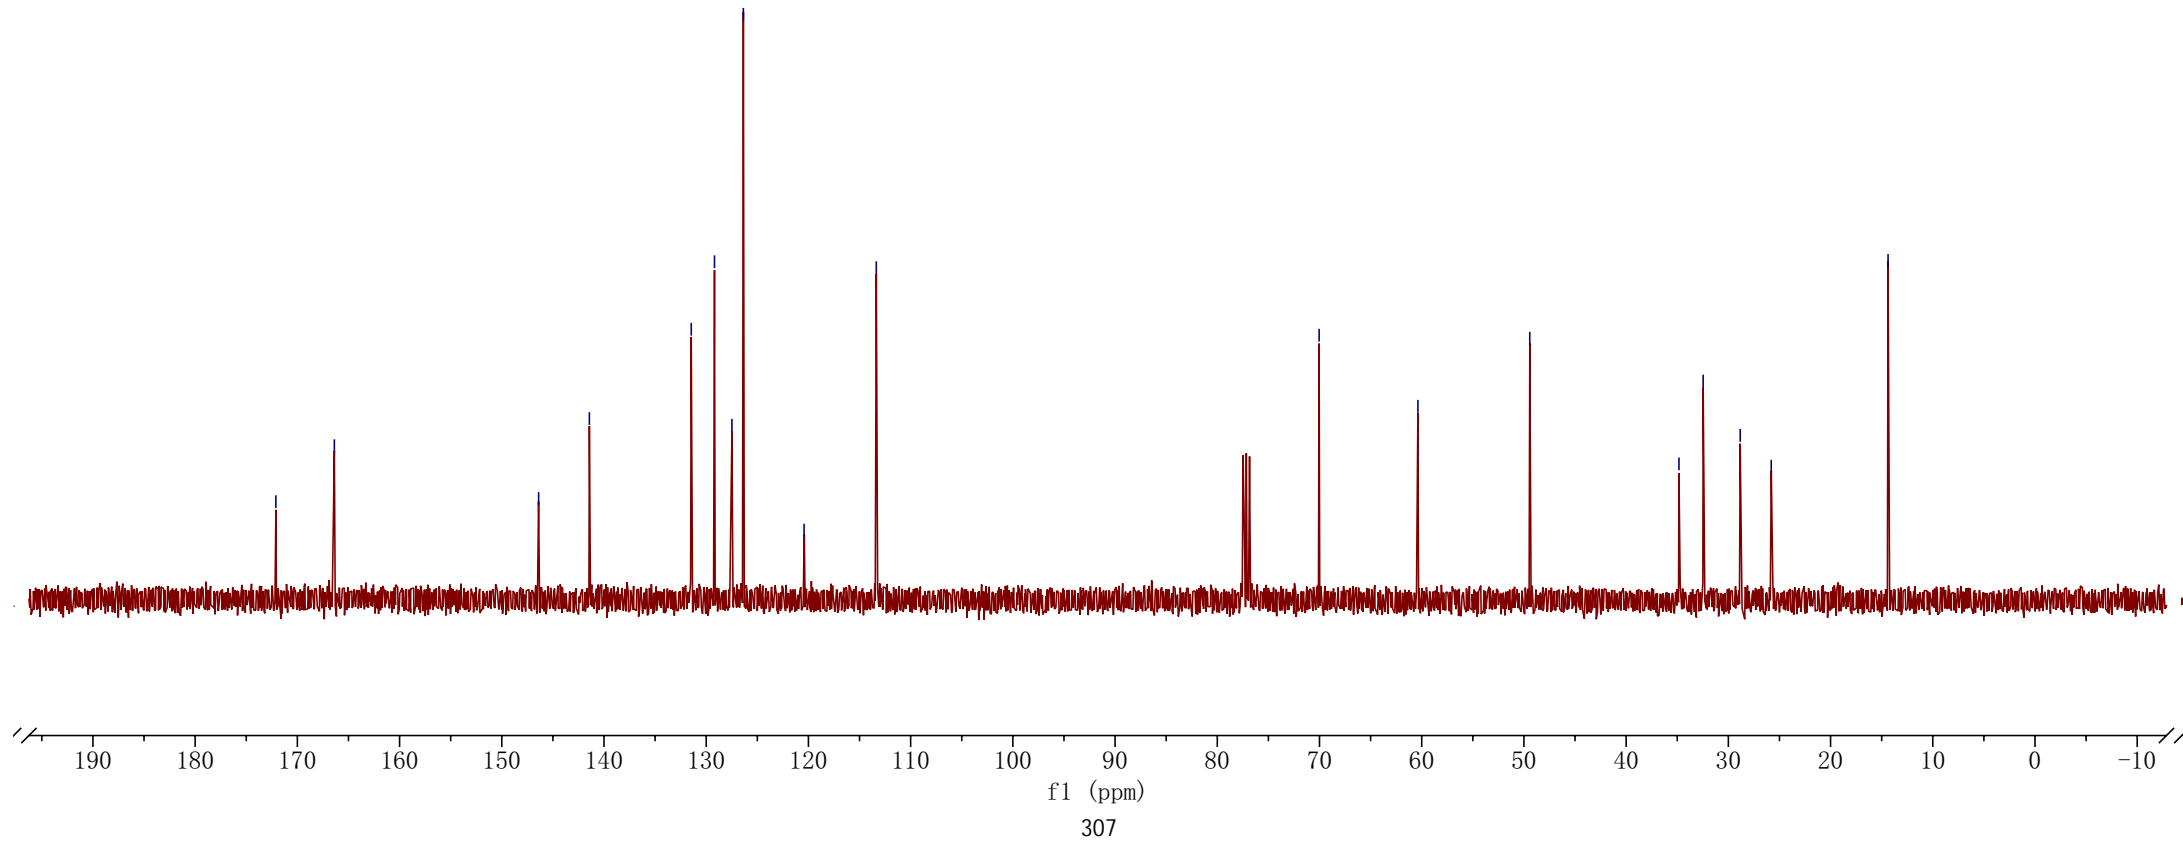

f1 (ppm)

7.55 7.54 7.52 7.52 7.41 7.39 7.39 7.39 7.32 7.30 7.30 7.28 7.22 7.22 7.22 7.21 7.20 6.50 6.48 2.72 2.70 2.69 2.69 2.68 2.66 2.66 2.65 2.64 2.63 2.63 2.62 2.45 2.44 2.43 2.41 2.41 2.39 2.39 2.38 2.37 2.36 2.36 2.25 2.24 2.23 2.22 2.22 2.20 2.19 2.18

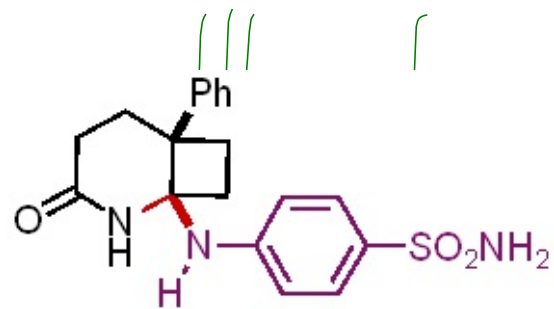

7i

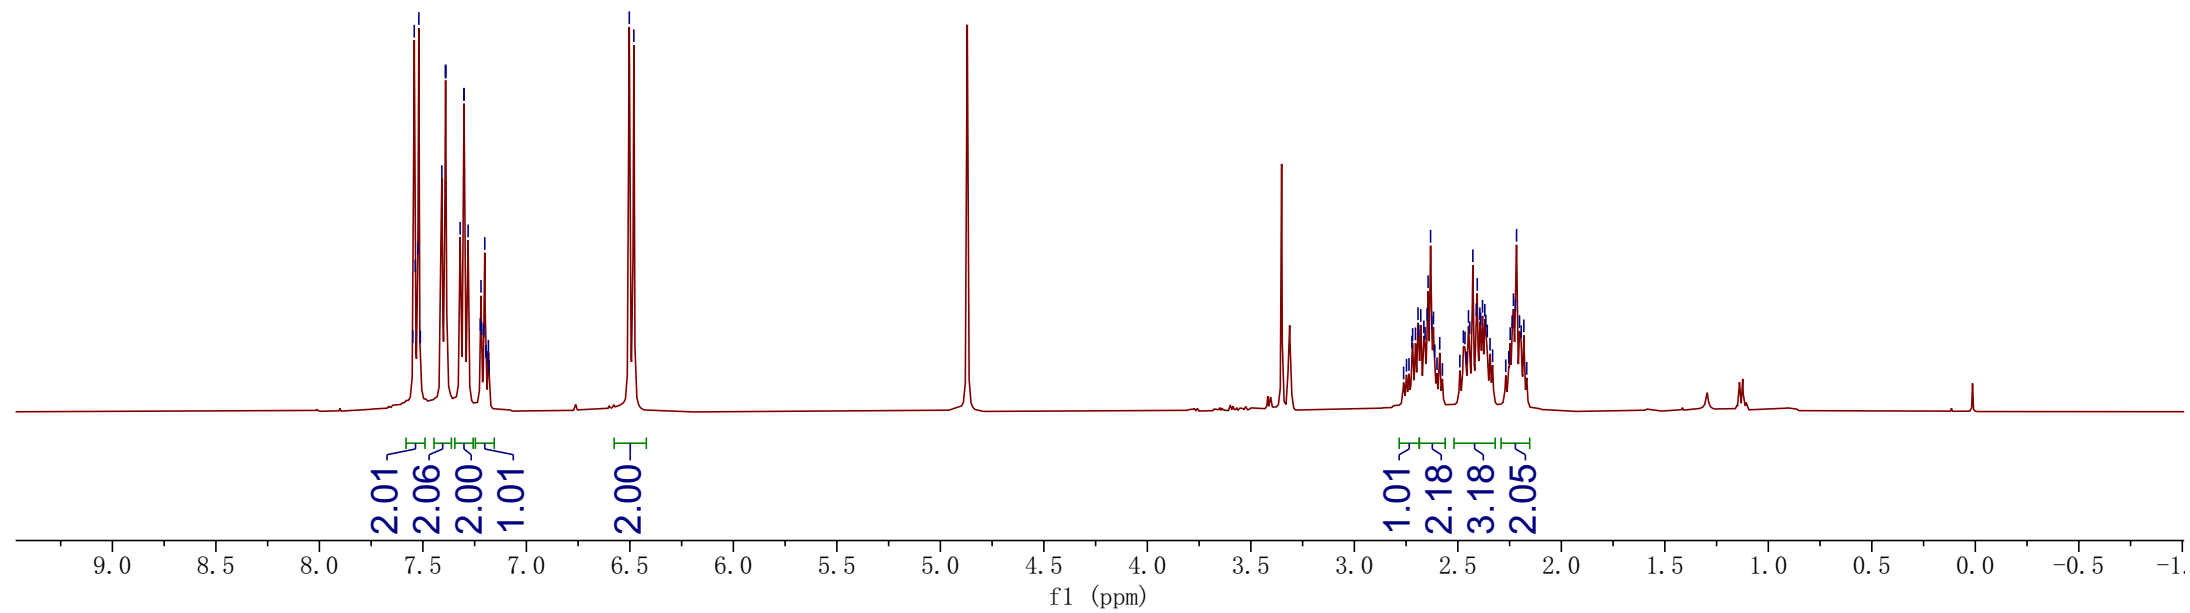

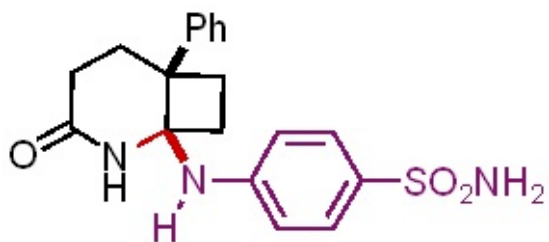

7i

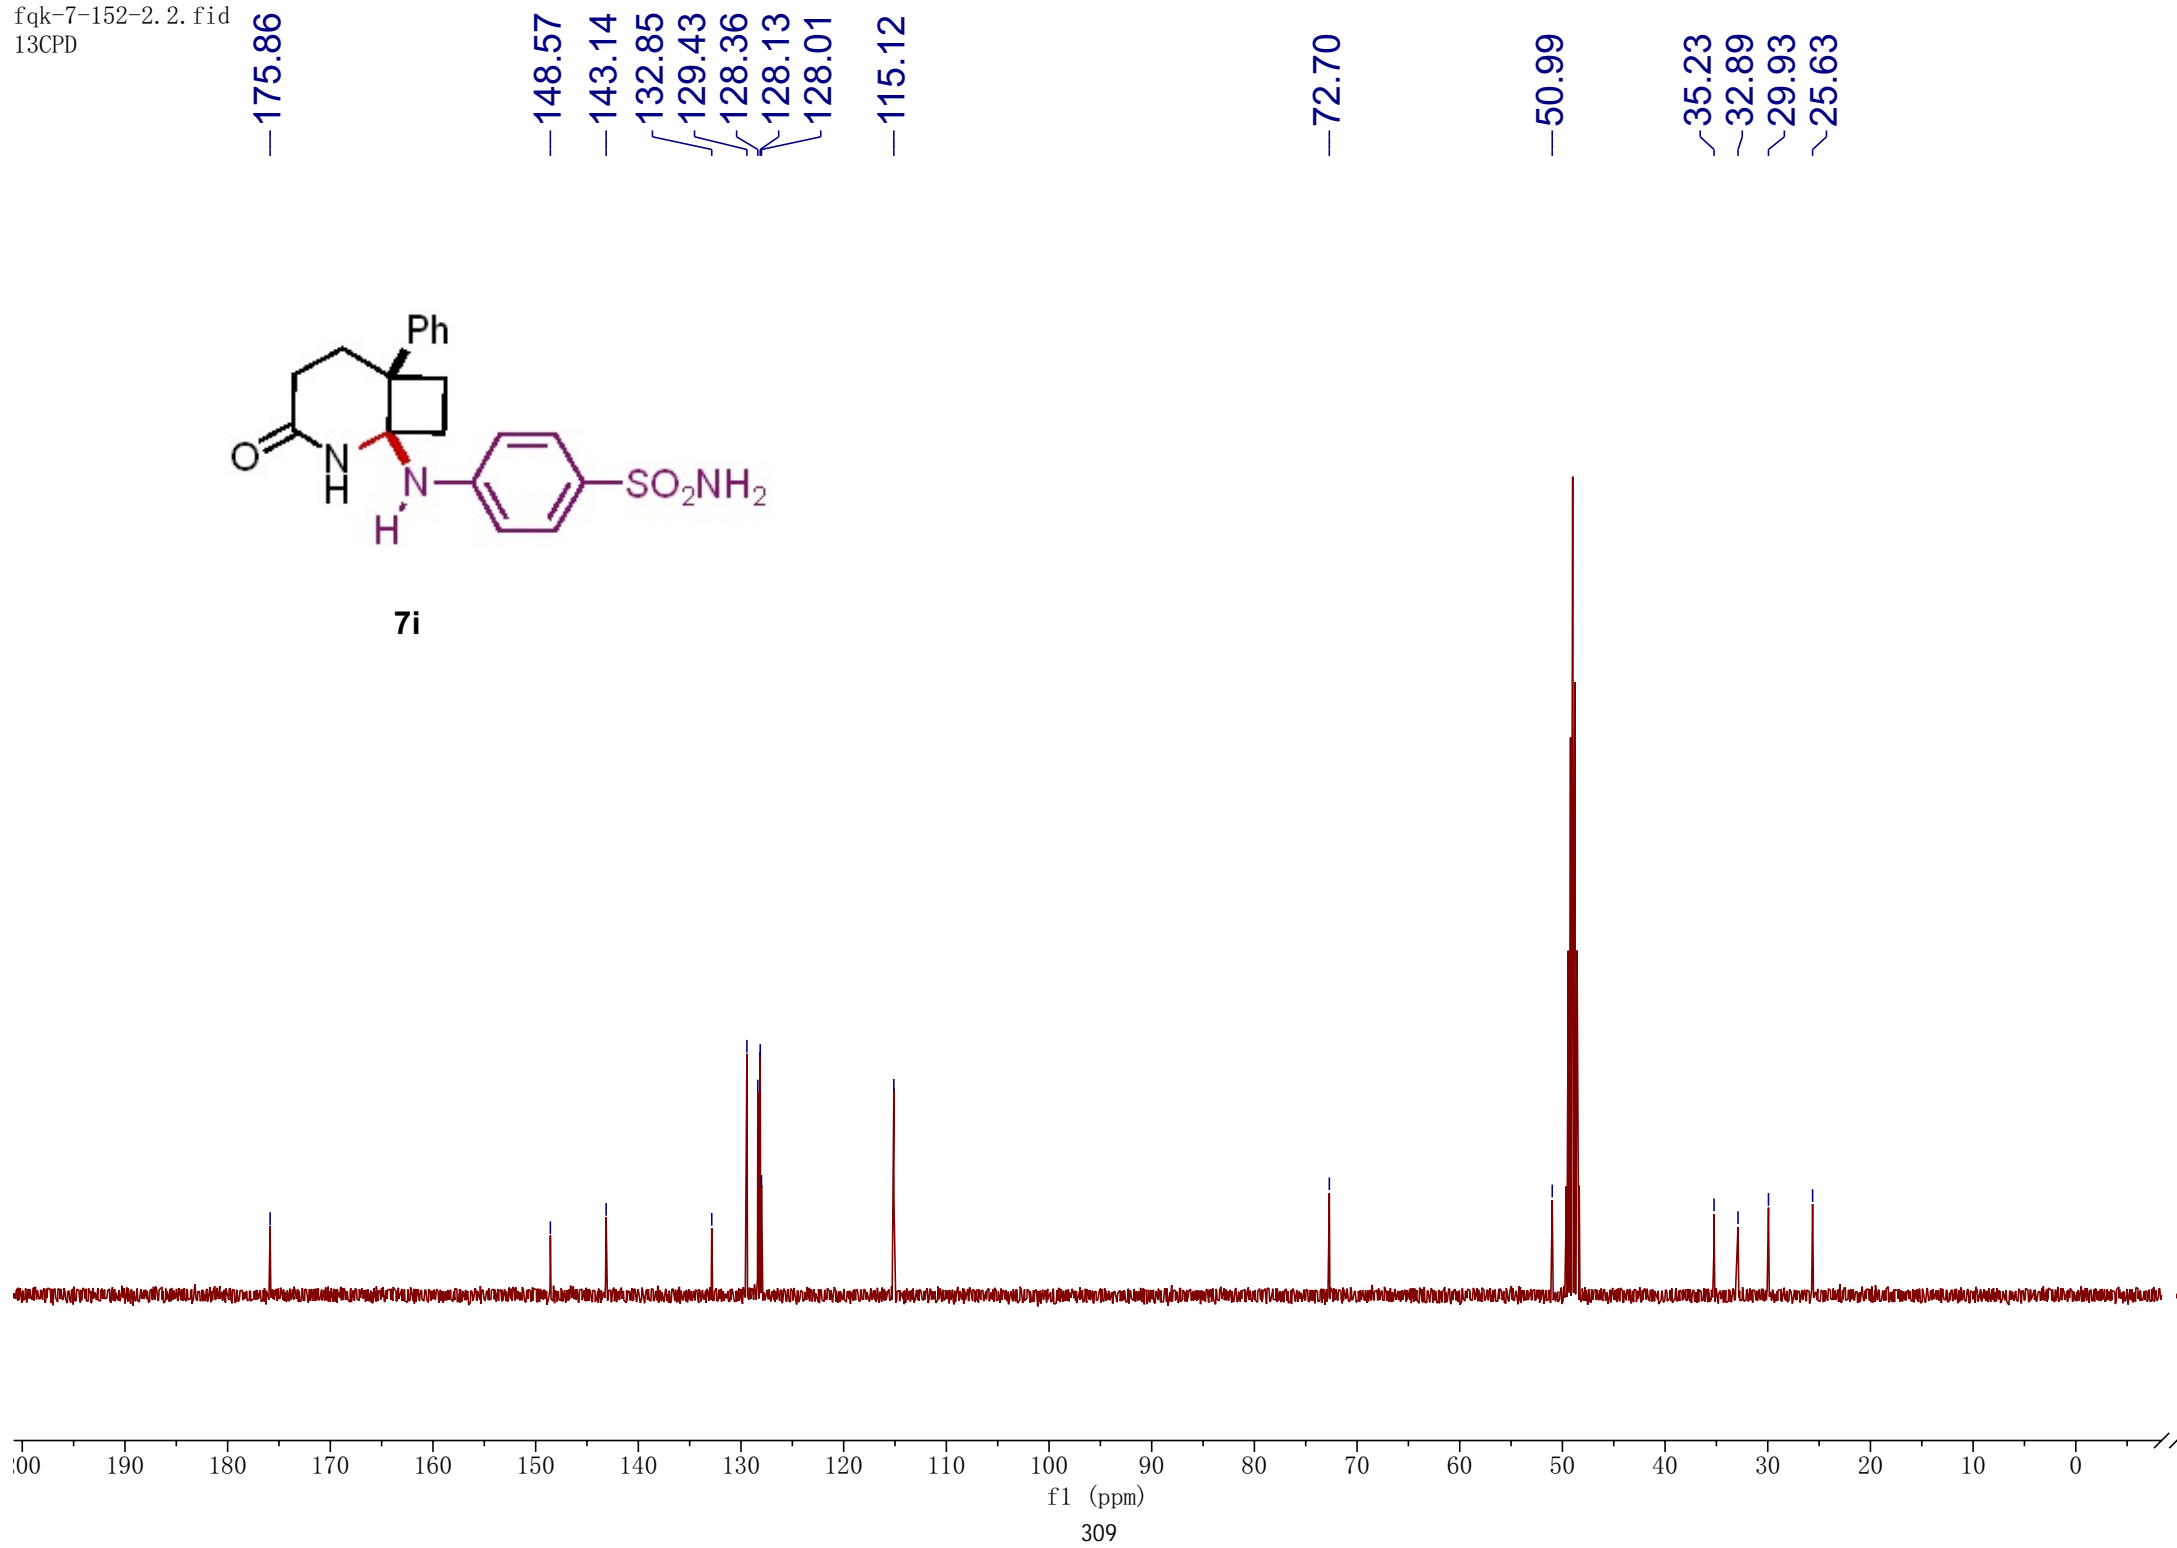

10.97  
10.05  
7.67  
7.45  
7.43  
7.41  
7.39  
7.38  
7.36  
7.34  
7.33  
7.28  
7.26  
7.24  
7.22  
7.21  
7.20  
7.17  
7.09  
7.08  
6.69  
6.68  
6.66  
4.14  
4.00  
3.65  
3.62  
3.61  
3.39  
3.35  
2.77  
2.76  
2.74  
2.73  
2.67  
2.64  
2.61  
2.60  
2.58  
2.50  
2.48  
2.46  
2.16  
2.14  
2.13  
2.12  
2.10  
2.02  
2.00  
1.99  
1.98

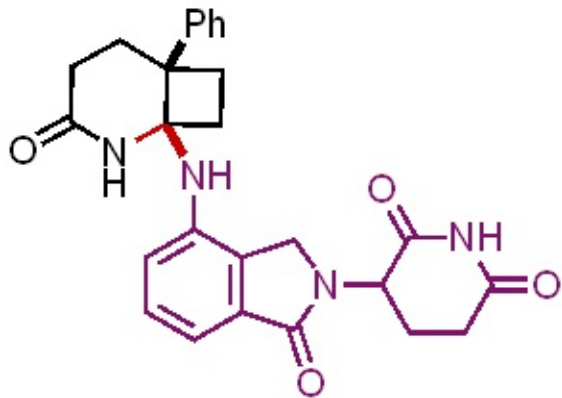

dr = 2:1

7j

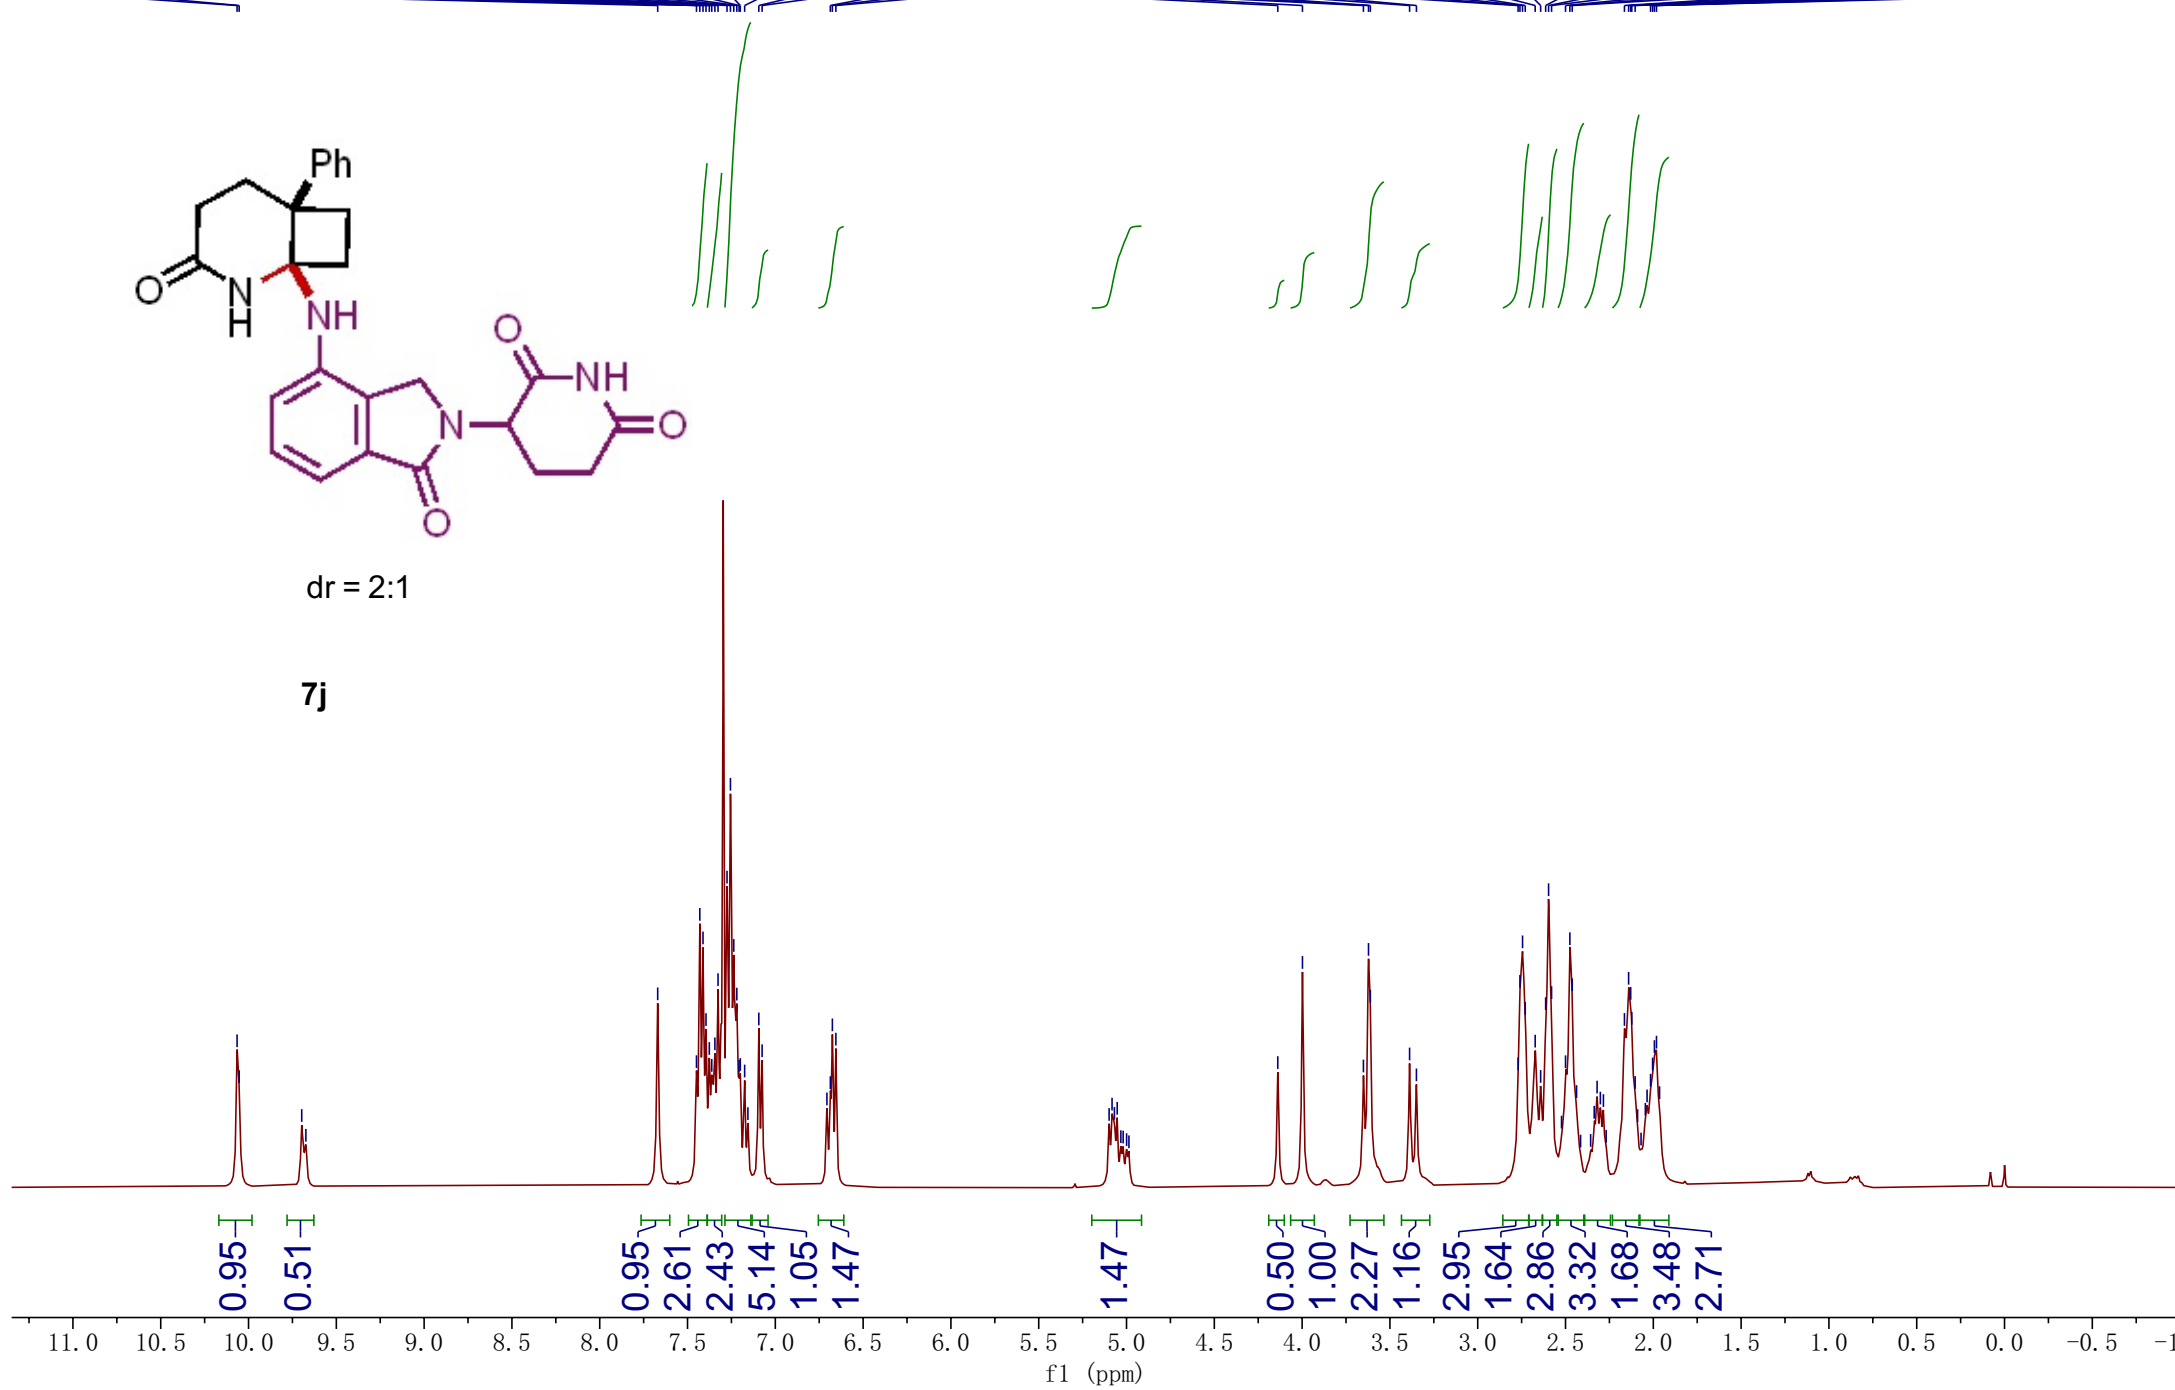

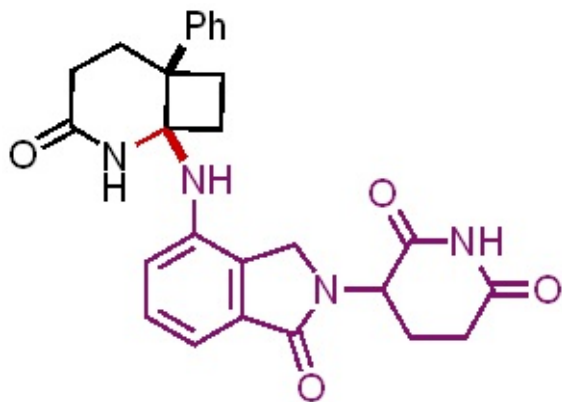

7j

173.15  
172.86  
172.11  
170.68  
170.34  
169.58  
169.44  
141.70  
141.53  
137.62  
137.24  
132.51  
132.29  
129.18  
129.06  
128.91  
128.08  
127.83  
127.44  
127.36  
126.48  
126.42  
115.78  
115.43  
114.18

70.33  
70.07  
51.73  
51.54  
49.74  
49.56  
44.35  
43.98  
34.18  
33.92  
32.82  
32.39  
31.51  
29.12  
28.95  
25.40  
25.11  
23.13

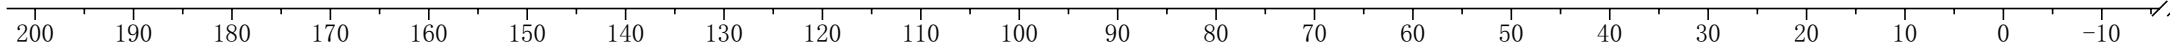

f1 (ppm)

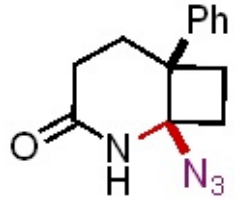

7k

7.88  
7.42  
7.40  
7.39  
7.33  
7.31  
7.29  
7.28  
7.26  
7.24

2.60  
2.58  
2.56  
2.54  
2.53  
2.51  
2.51  
2.49  
2.49  
2.47  
2.44  
2.43  
2.42  
2.40  
2.38  
2.37  
2.35  
2.34  
2.28  
2.27  
2.25  
2.24  
2.22  
2.13  
2.12  
2.11  
2.10  
2.09  
2.07

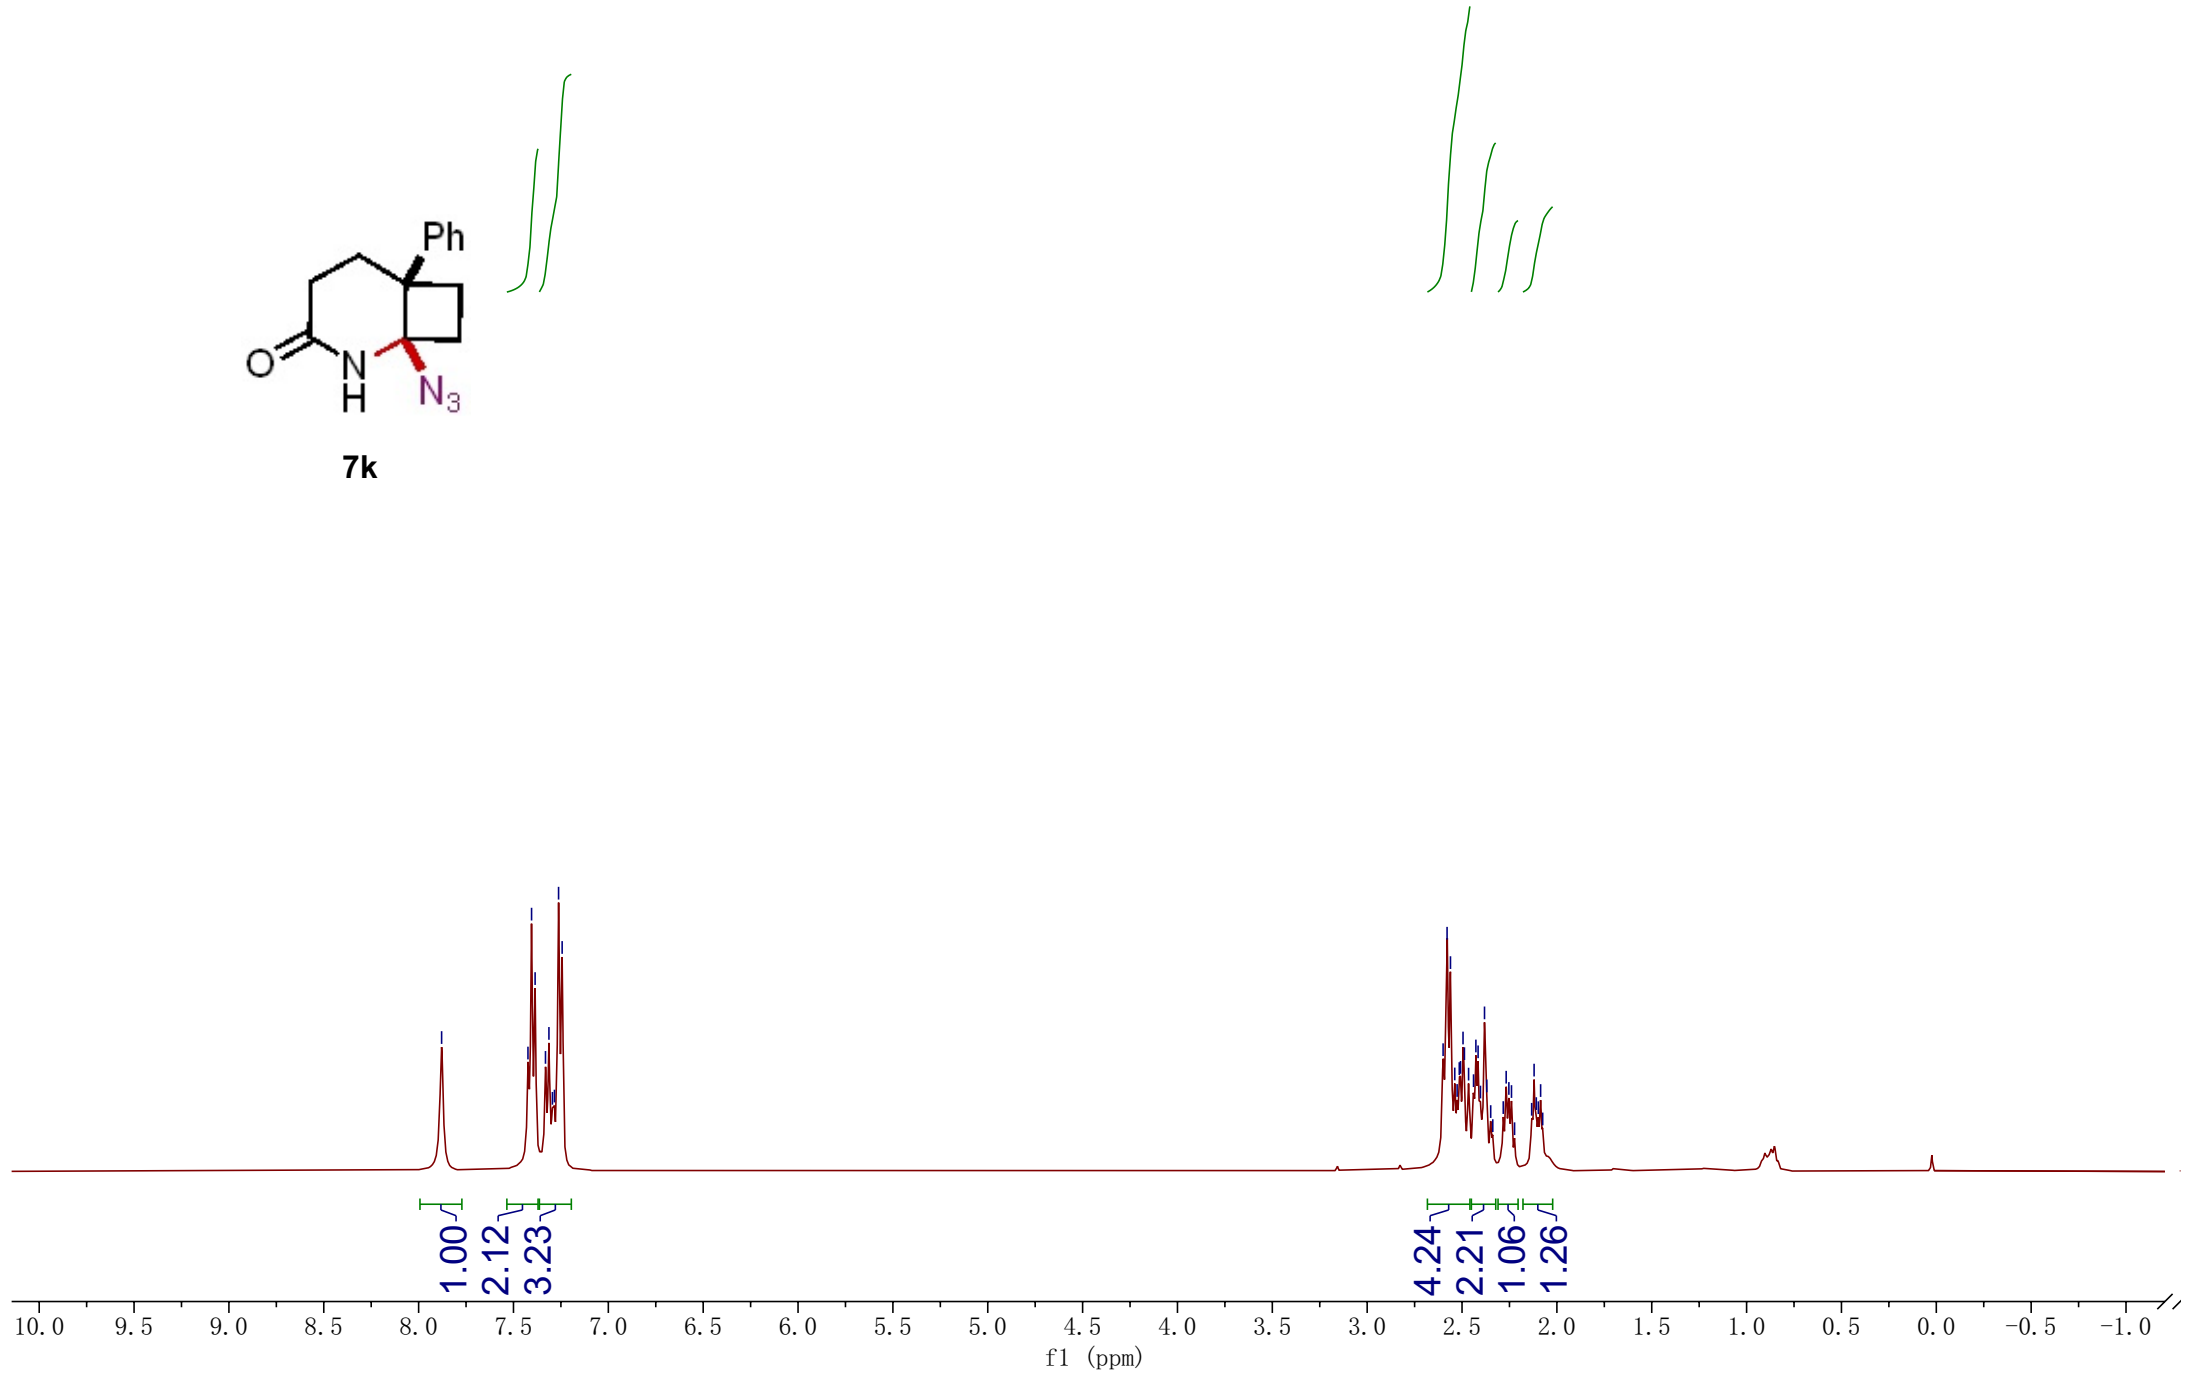

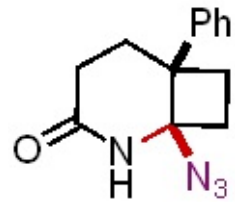

7k

-173.17

-142.46

128.28

126.86

126.59

-77.56

-50.17

34.94

32.40

27.78

26.69

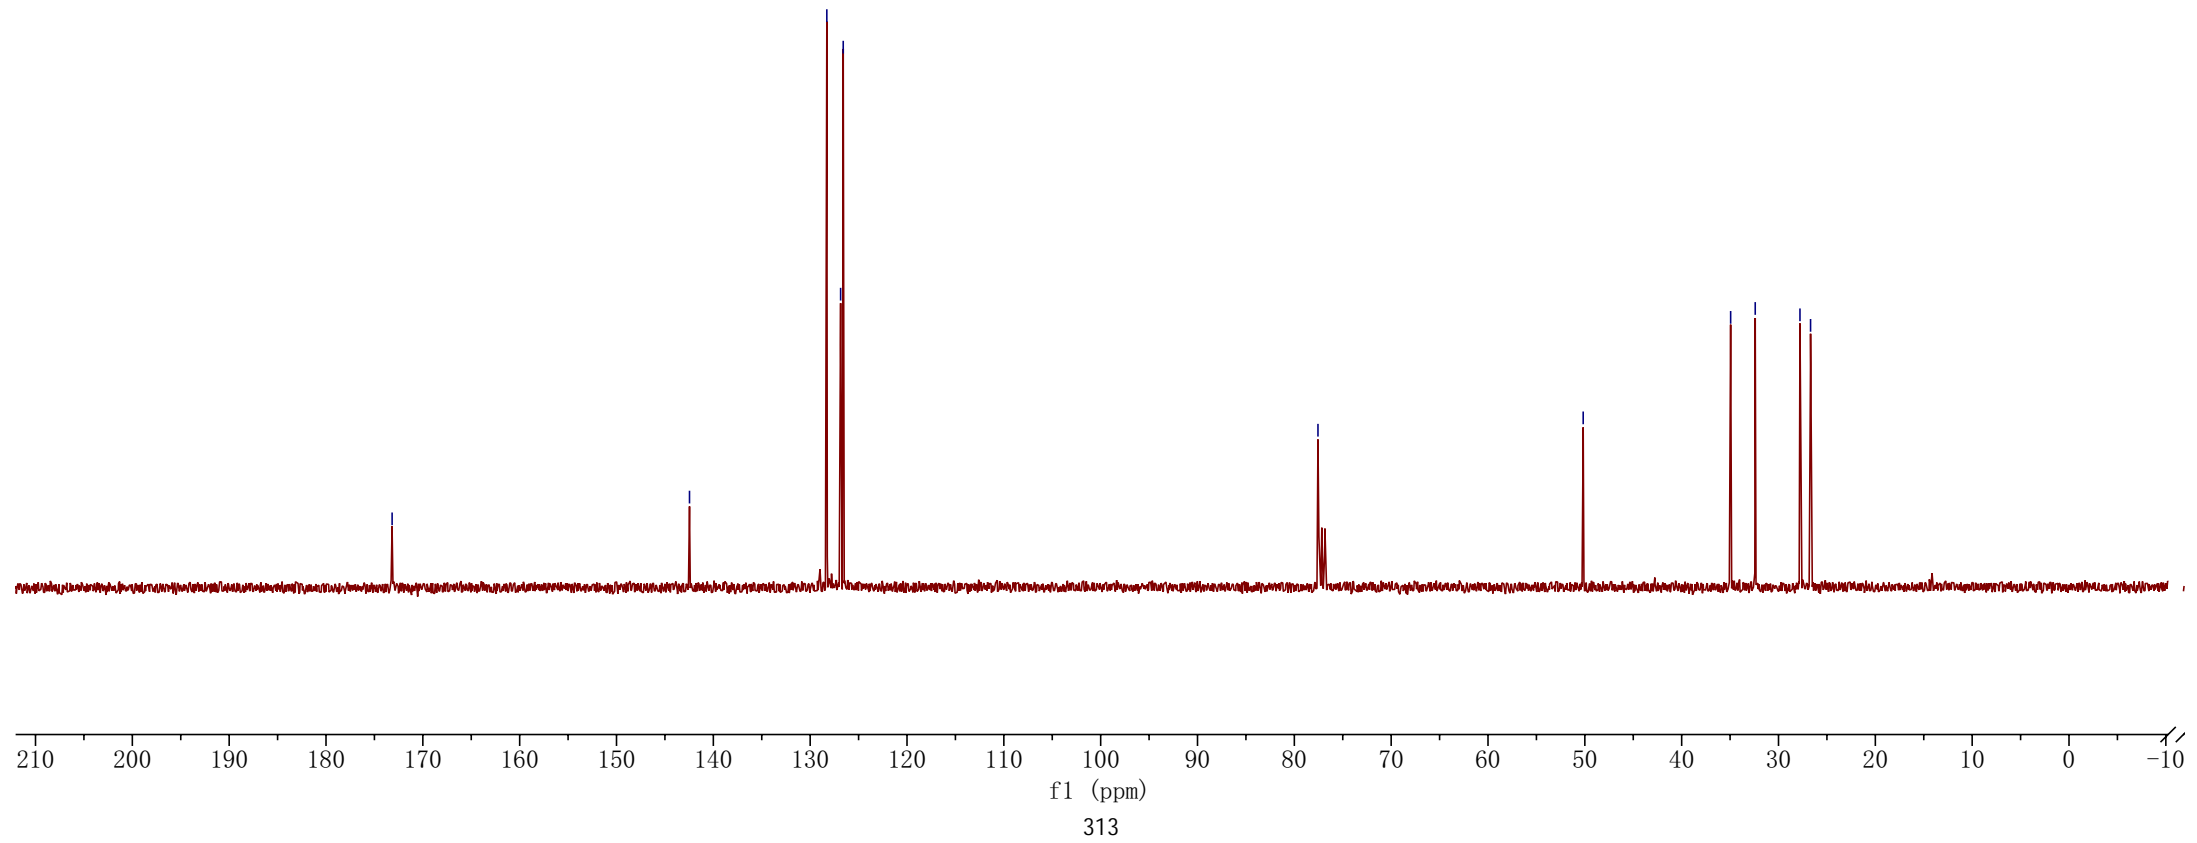

fqk-7-11.1.f1d  
PROTON

7.54  
7.52  
7.17  
7.15  
7.15  
7.14  
7.13  
7.12  
6.99  
6.98  
6.98  
6.97  
6.96  
6.89  
6.88  
6.87  
6.75

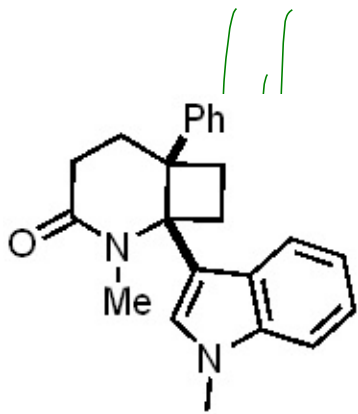

8a

3.53  
2.81  
2.79  
2.75  
2.63  
2.59  
2.57  
2.56  
2.55  
2.53  
2.53  
2.51  
2.50  
2.49  
2.46  
2.45  
2.43  
2.42  
2.41  
2.15  
2.11

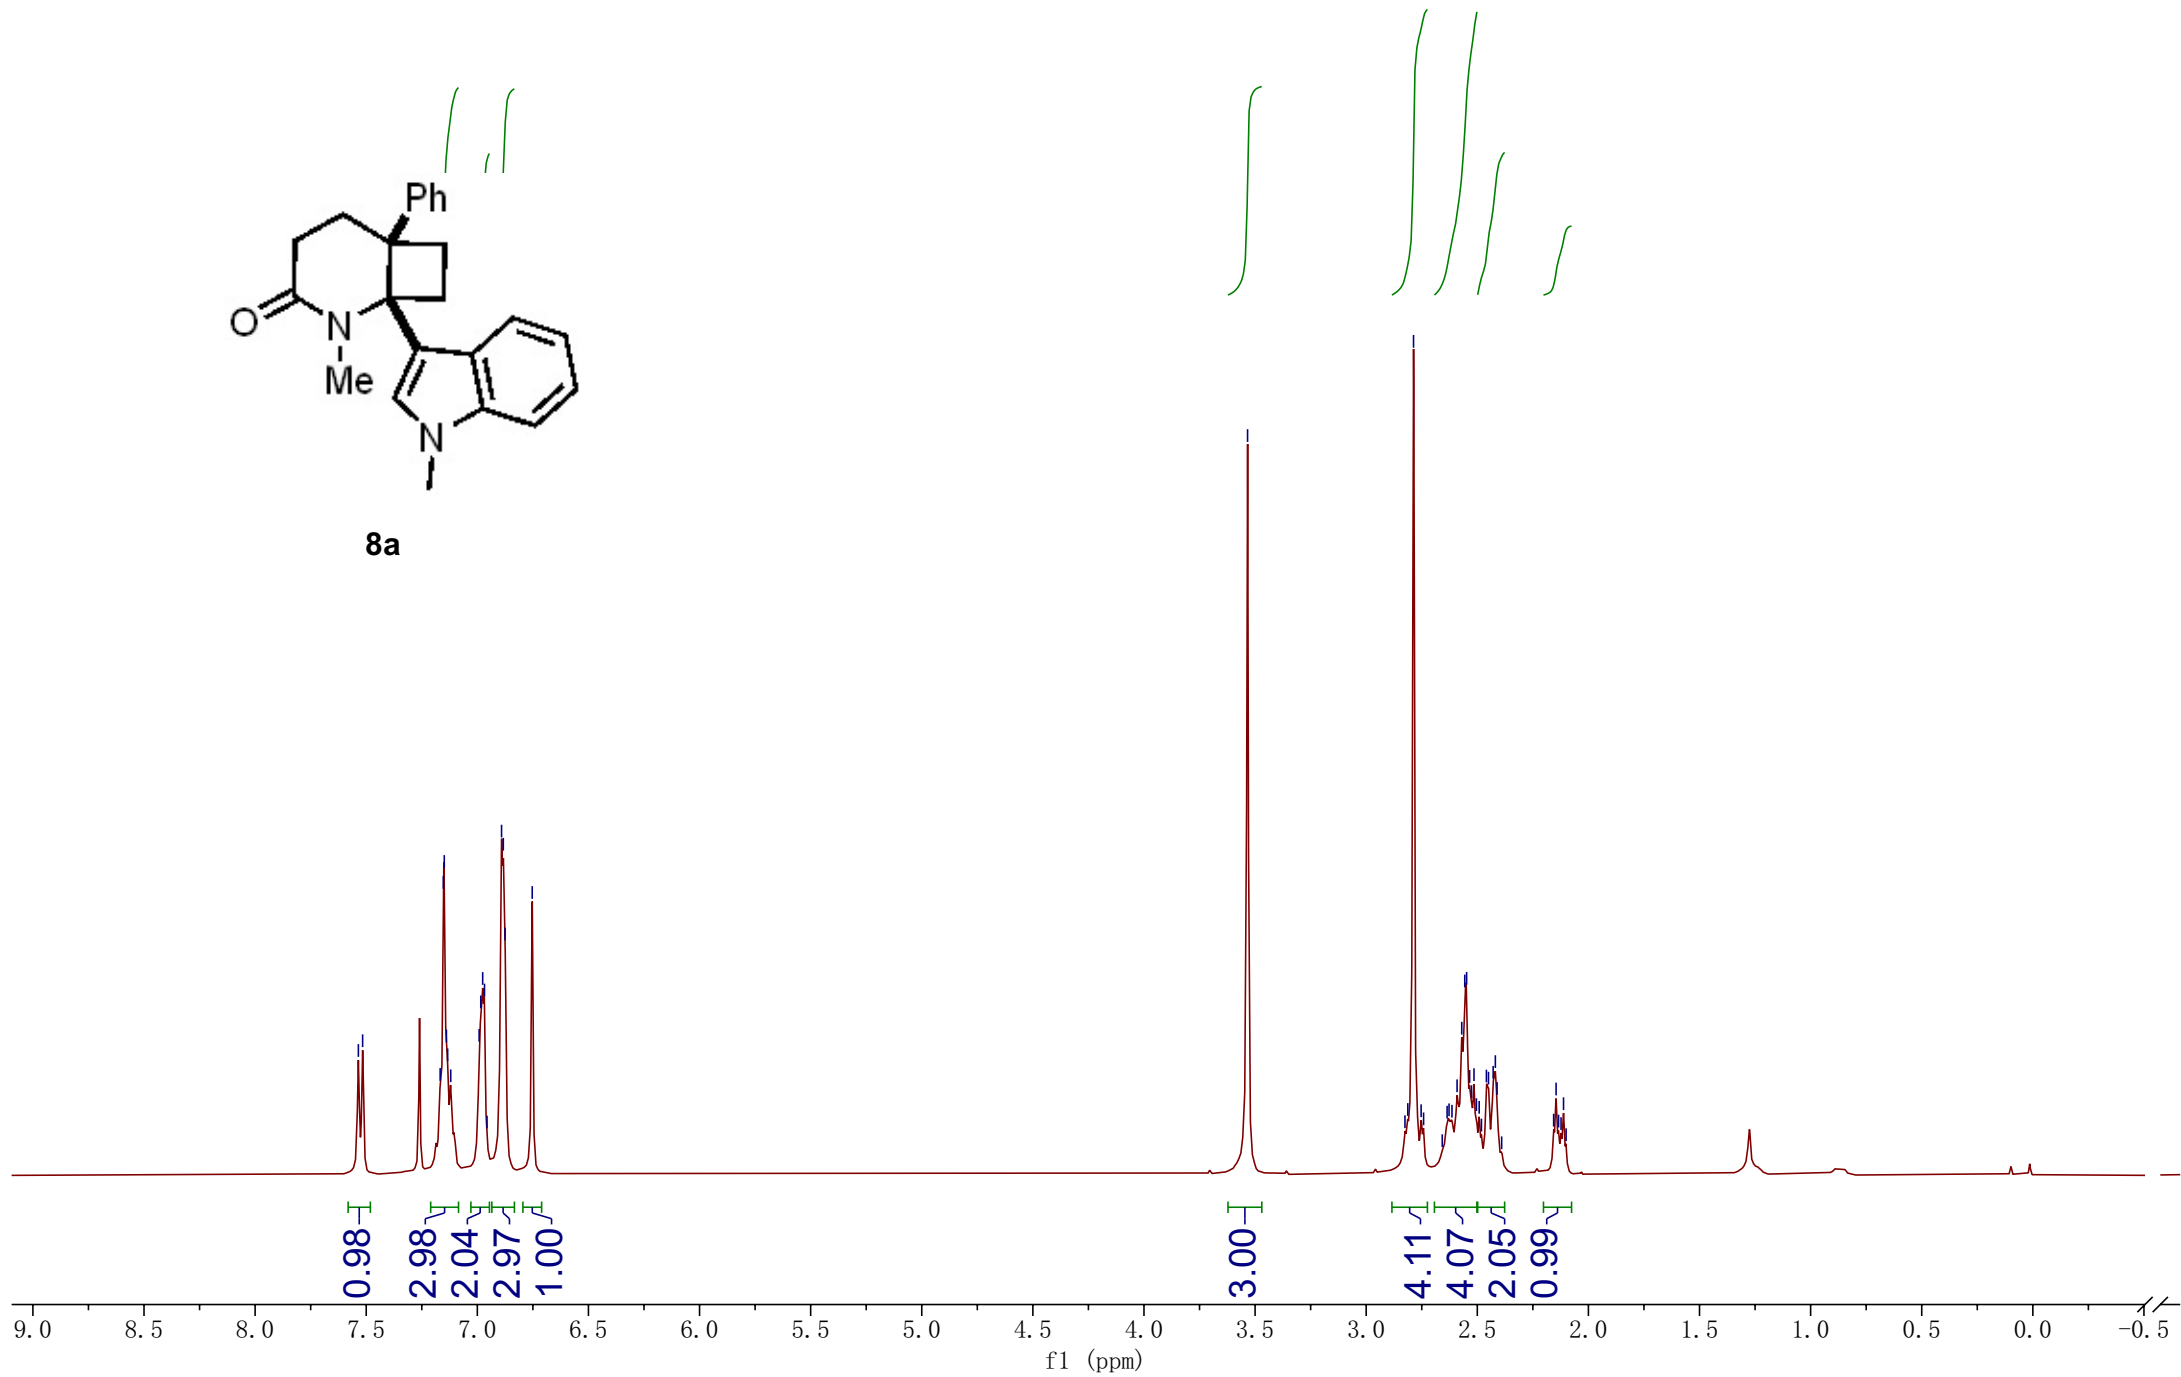

-171.35

-145.33

-136.95

127.28

127.19

126.45

125.61

121.49

120.38

120.09

115.30

109.35

-67.22

-51.28

34.83

32.70

32.52

30.01

28.95

26.78

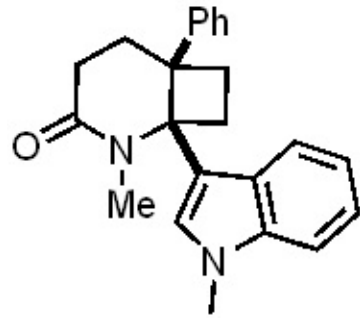

8a

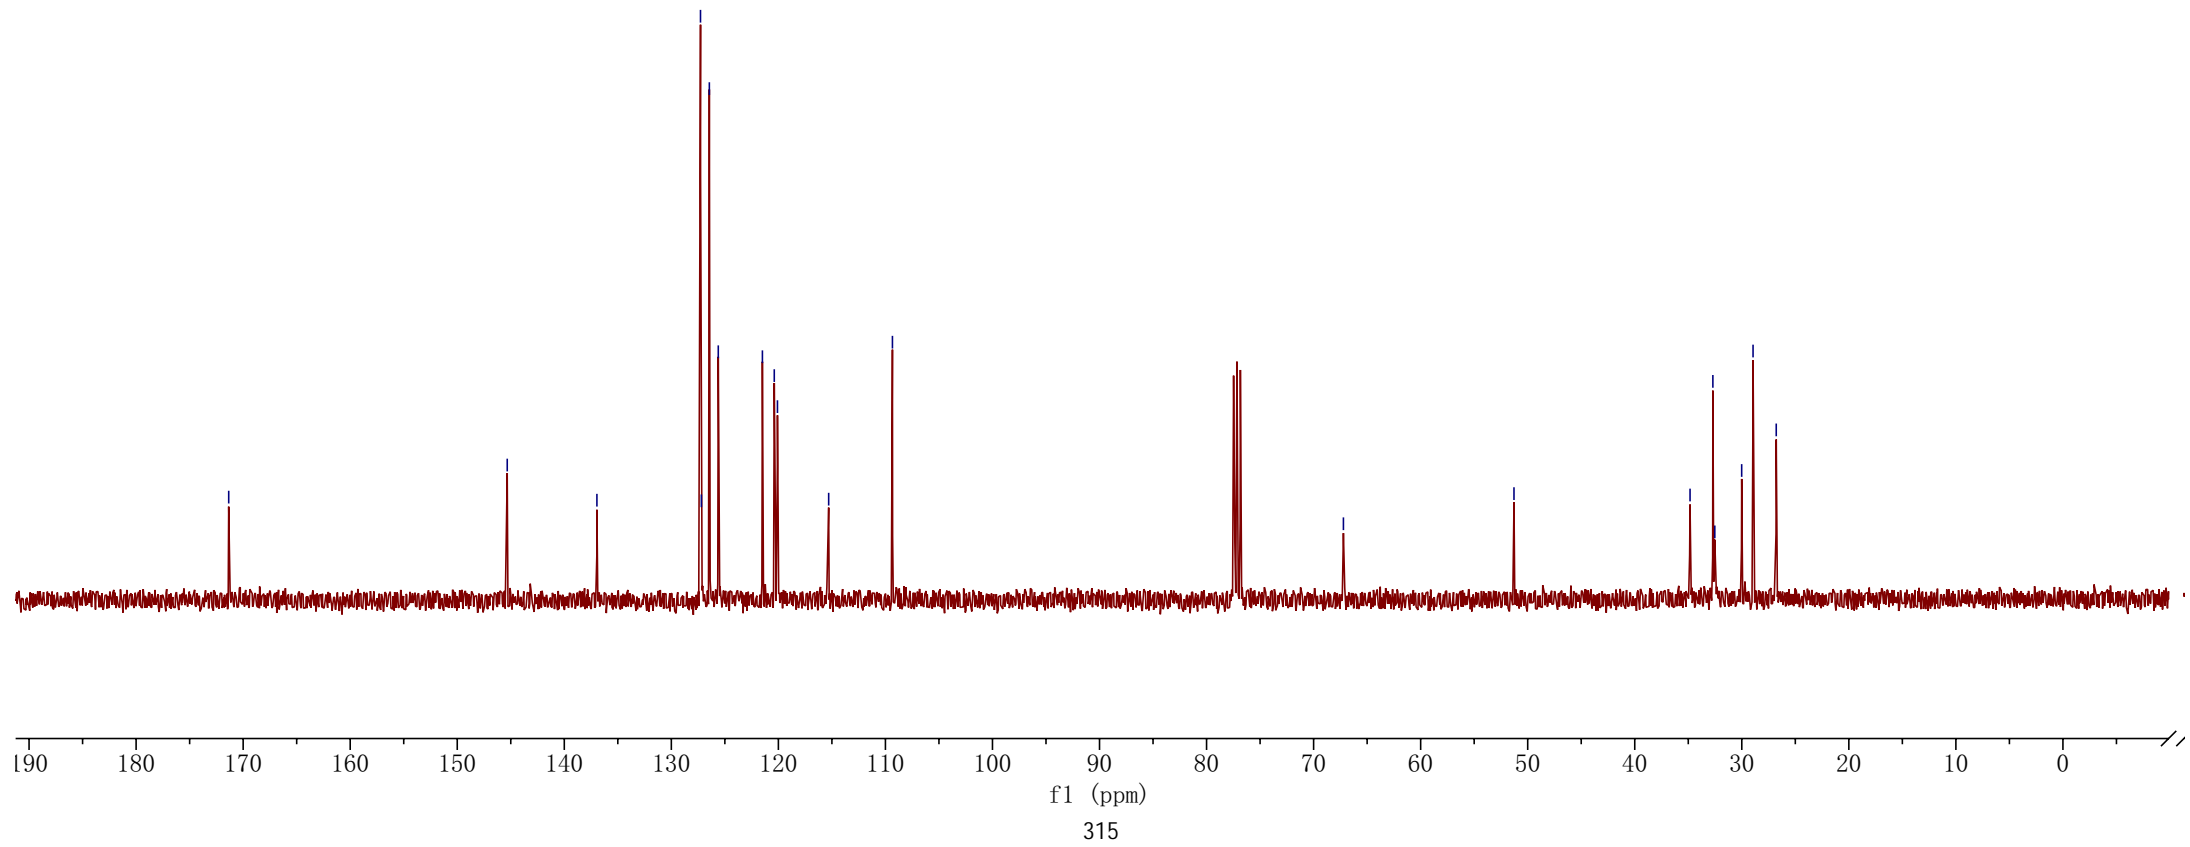

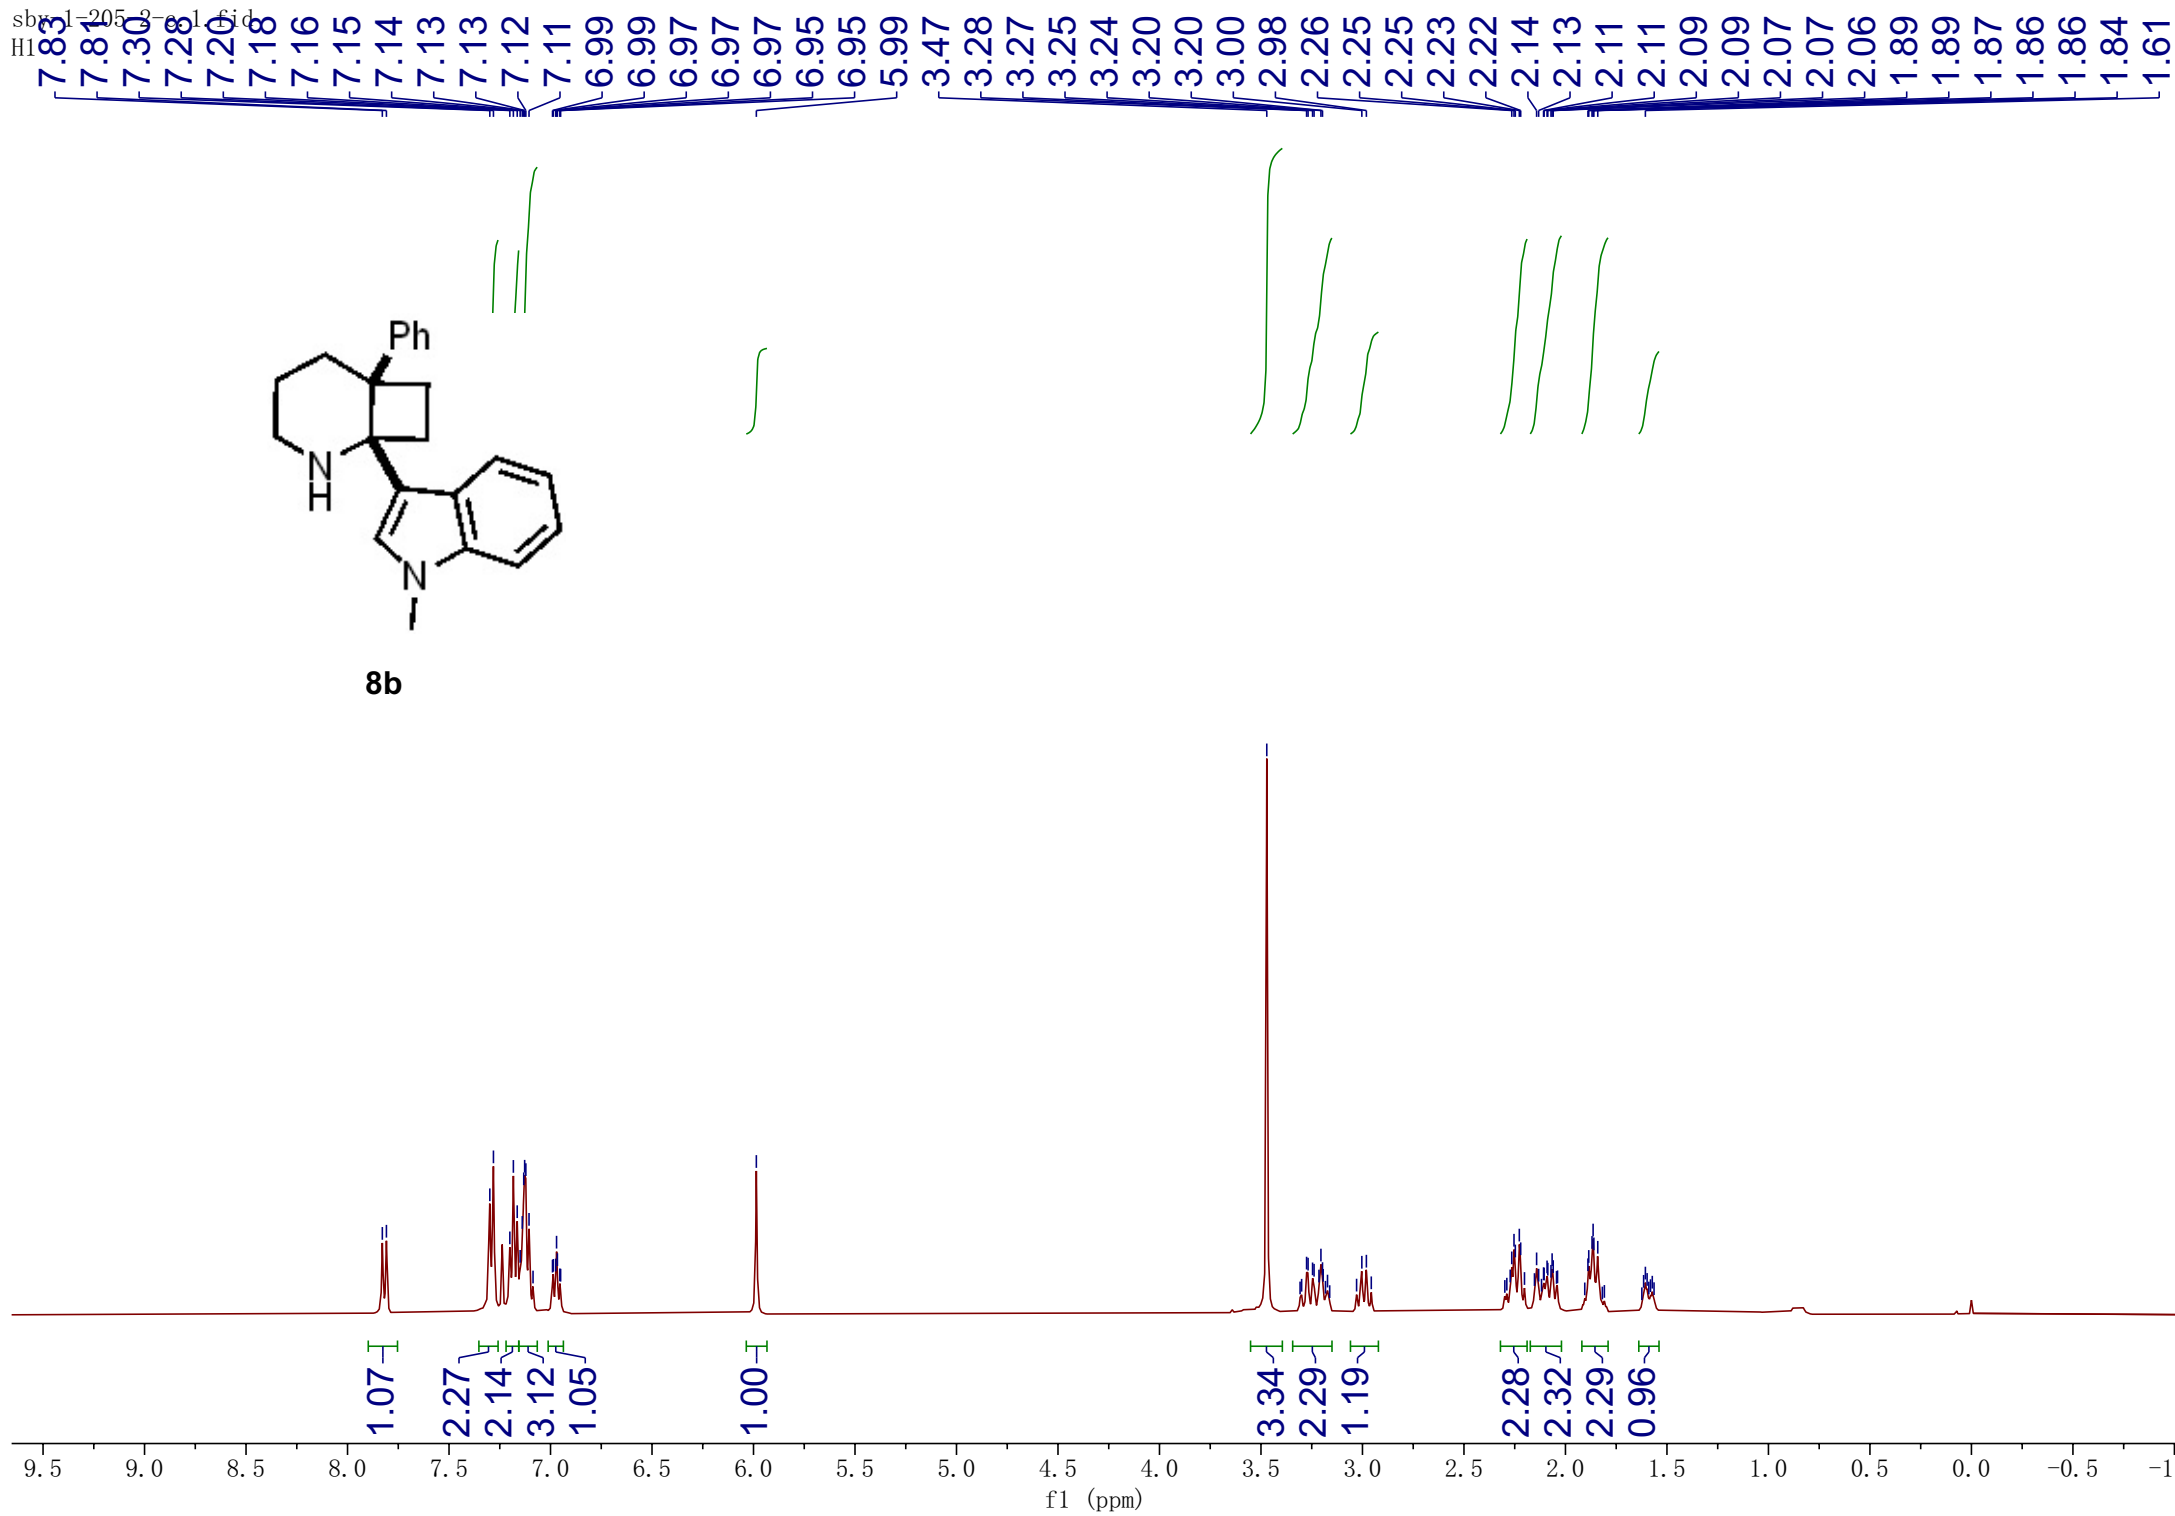

—148.57  
136.92  
127.72  
127.34  
127.14  
126.60  
125.53  
122.12  
121.27  
118.37  
—109.01

—61.80

48.14  
—42.02  
—38.68  
32.66  
28.40  
27.11  
22.37

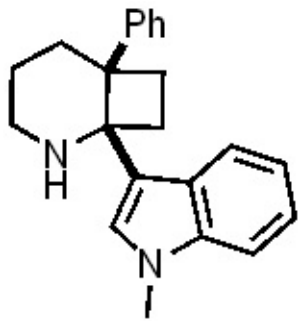

8b

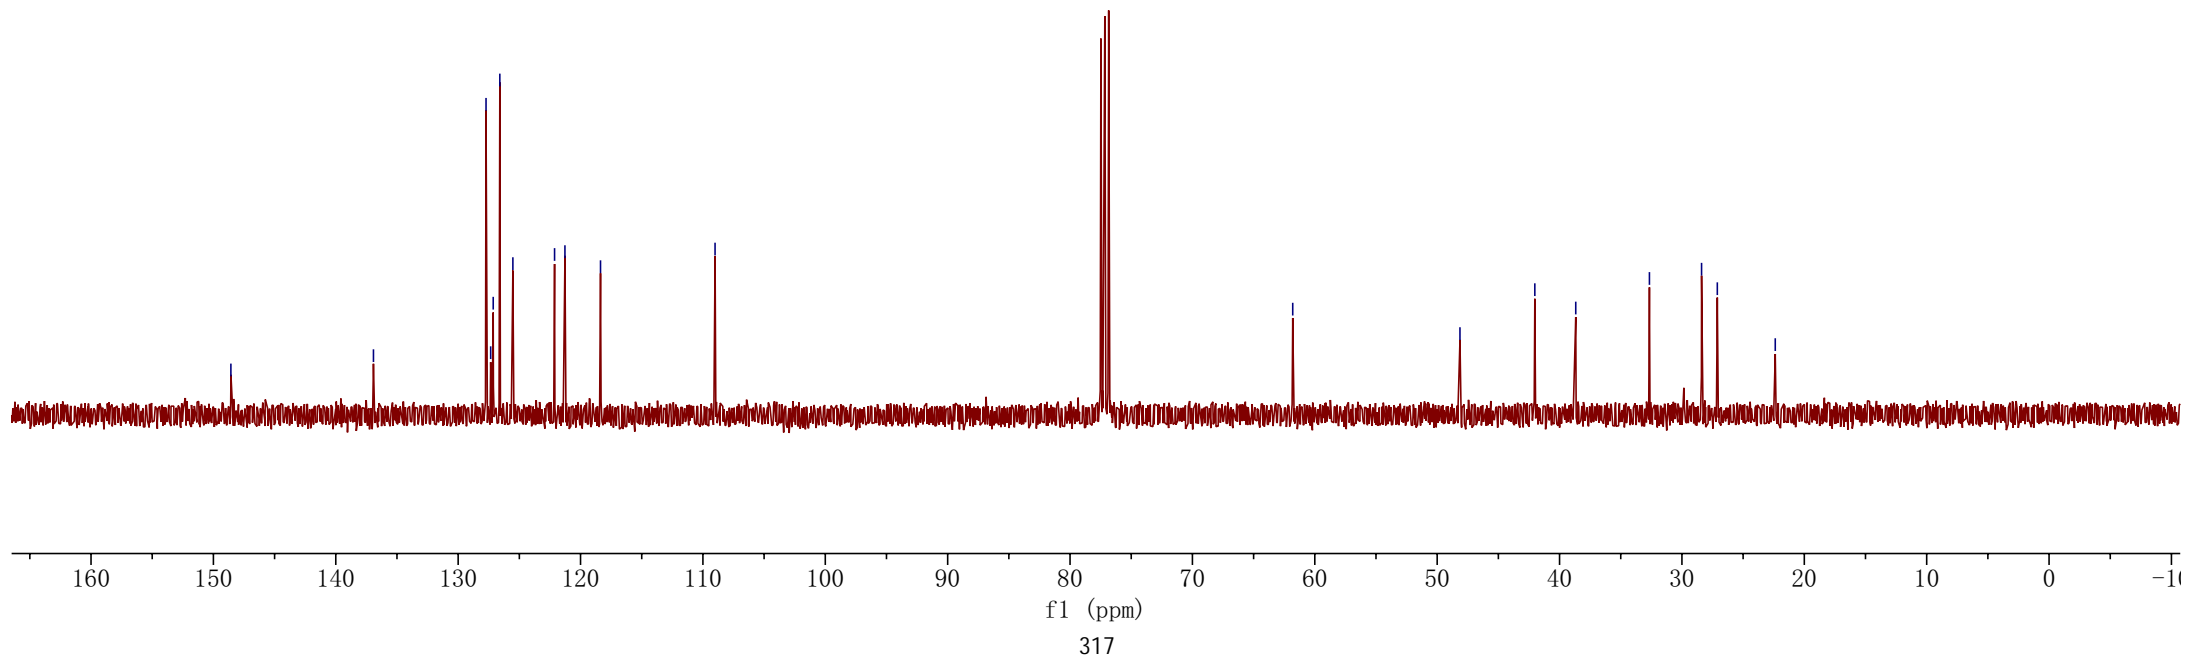

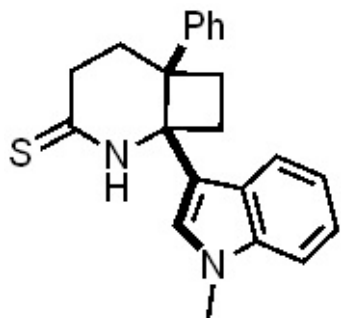

8c

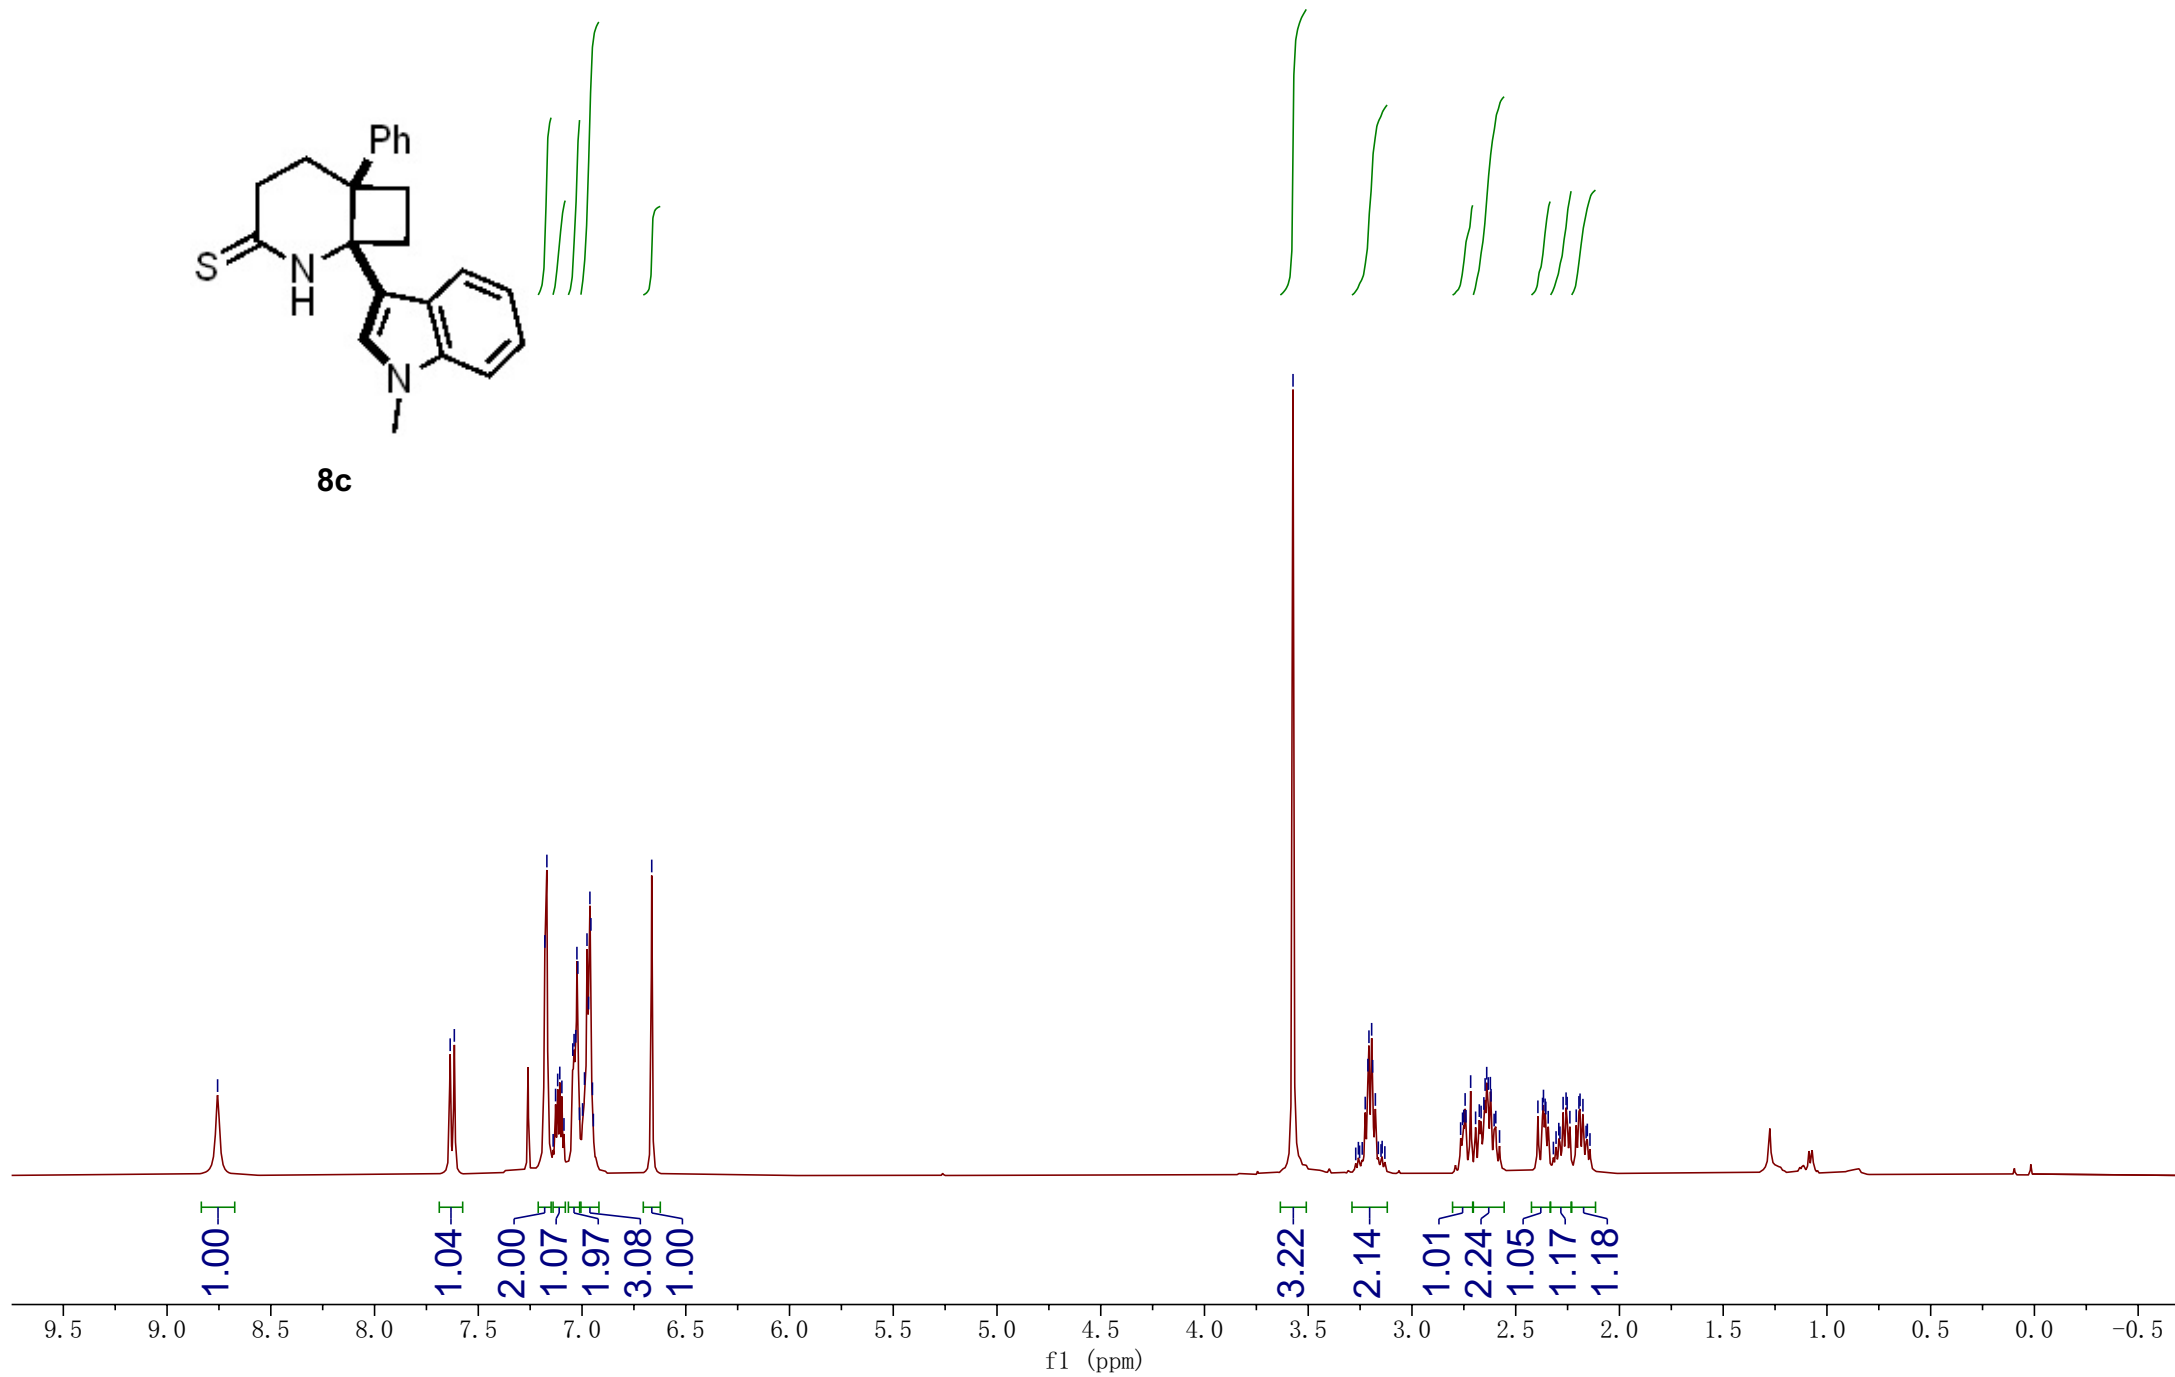

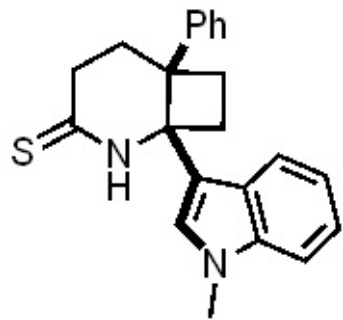

8c

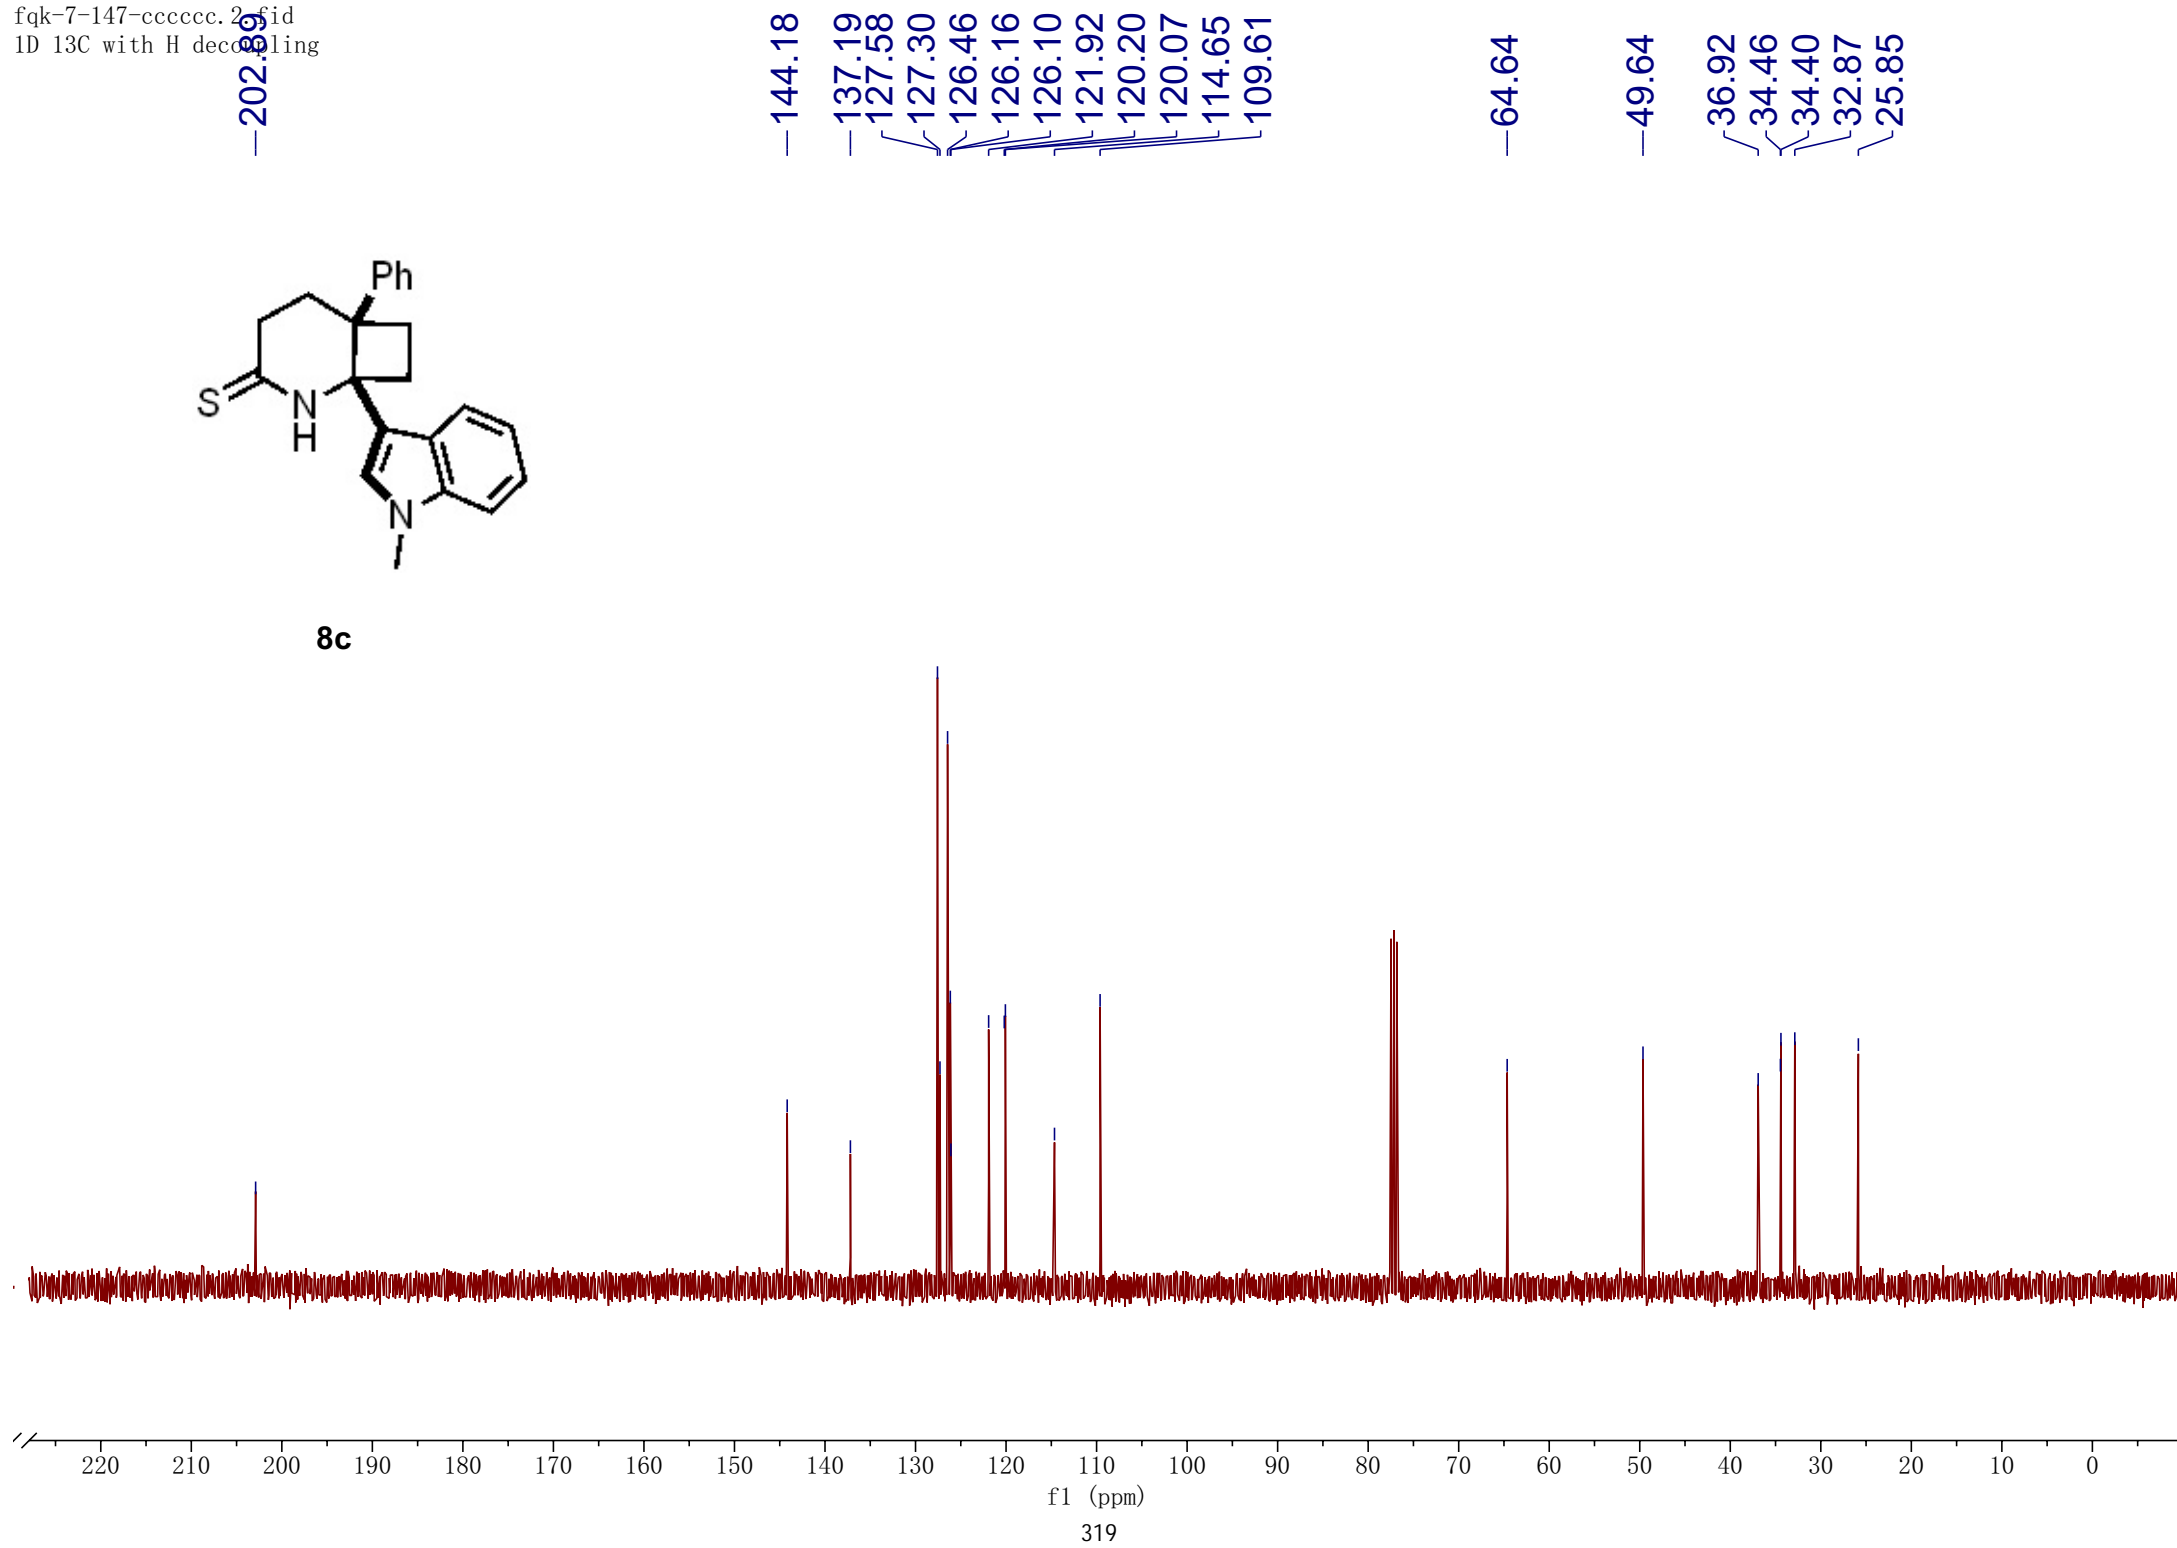

8.14  
7.73  
7.71  
7.17  
7.15  
7.04  
7.03  
7.01  
6.96  
6.95  
6.93  
6.24

3.46  
2.67  
2.64  
2.62  
2.60  
2.57  
2.29  
2.26  
2.23  
2.22  
2.10  
2.07  
2.06  
2.03  
1.79  
1.78  
1.75  
1.72  
0.88

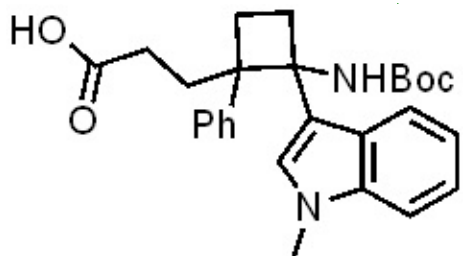

8d

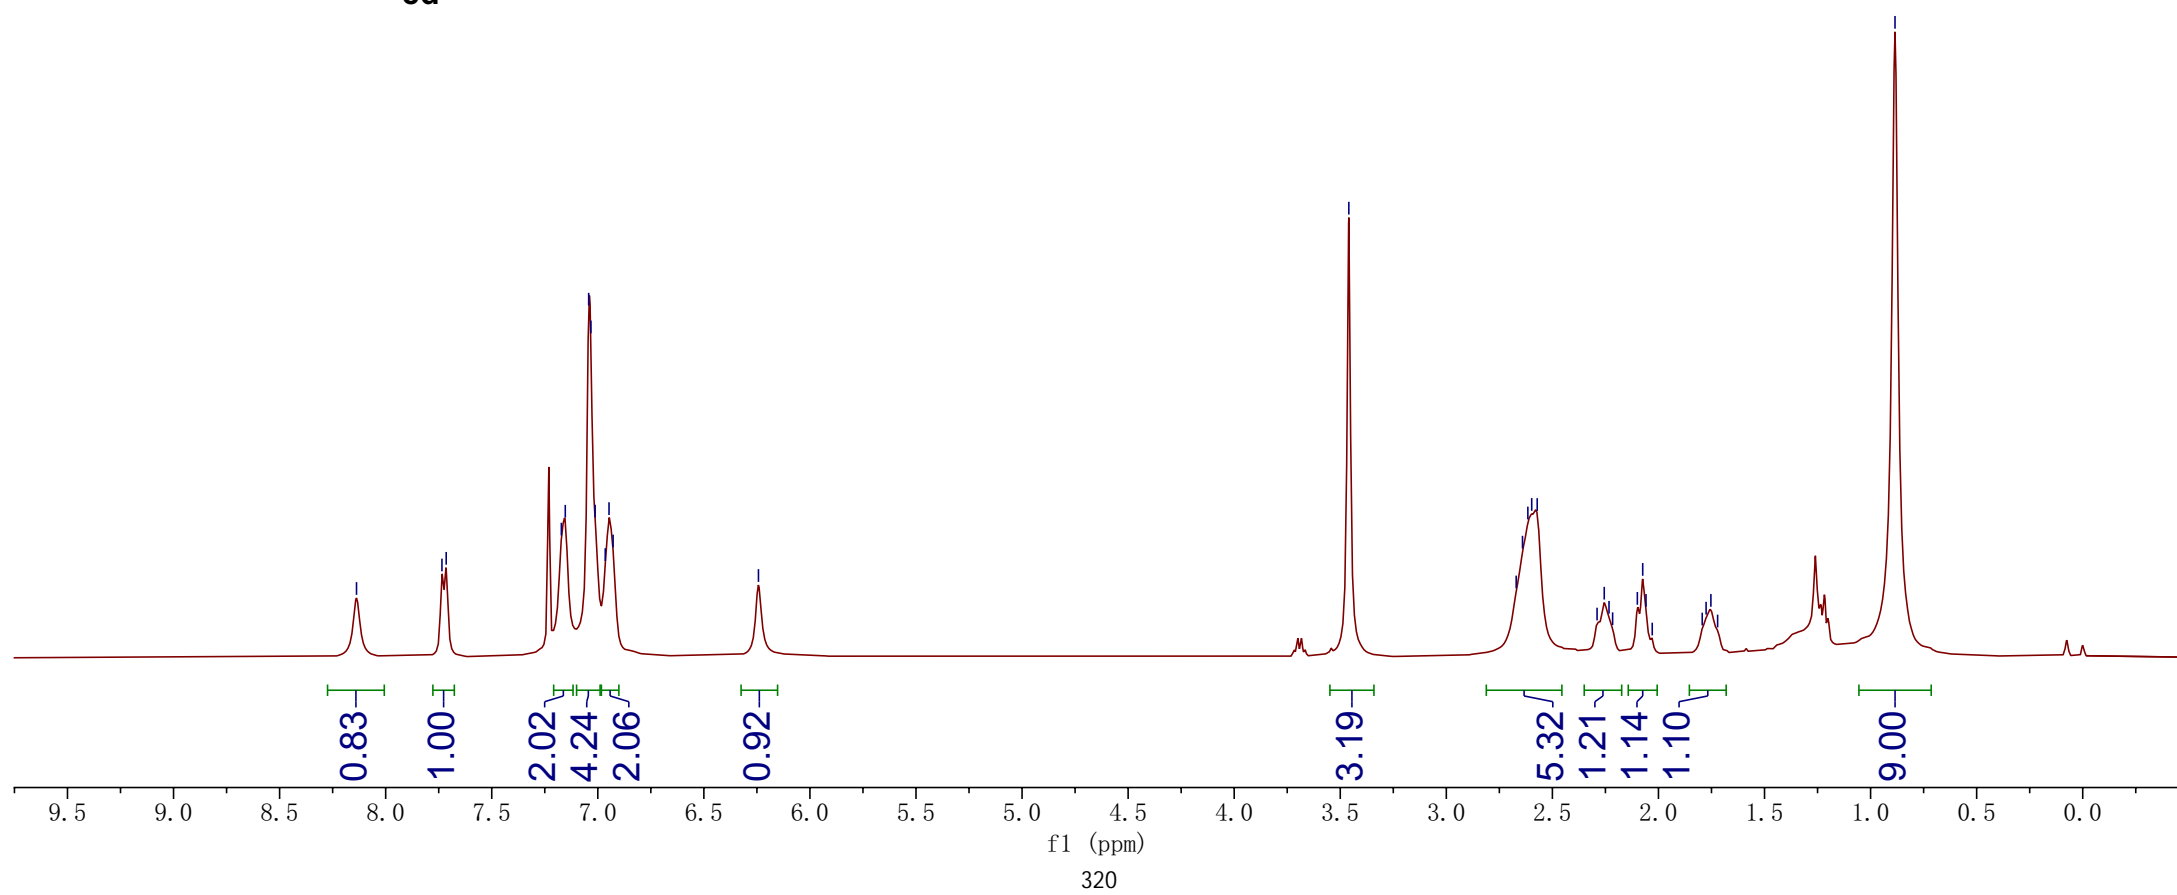

—178.51

—158.26

143.33

136.85

127.50

127.20

127.06

126.27

125.93

121.36

120.94

118.65

—108.57

—80.62

—62.38

—55.69

33.62

33.38

32.53

30.26

27.91

23.56

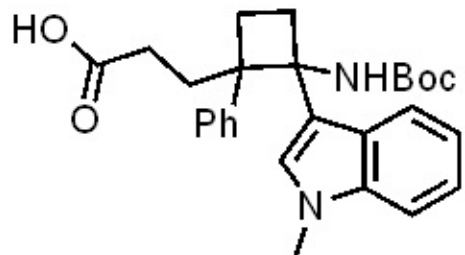

8d

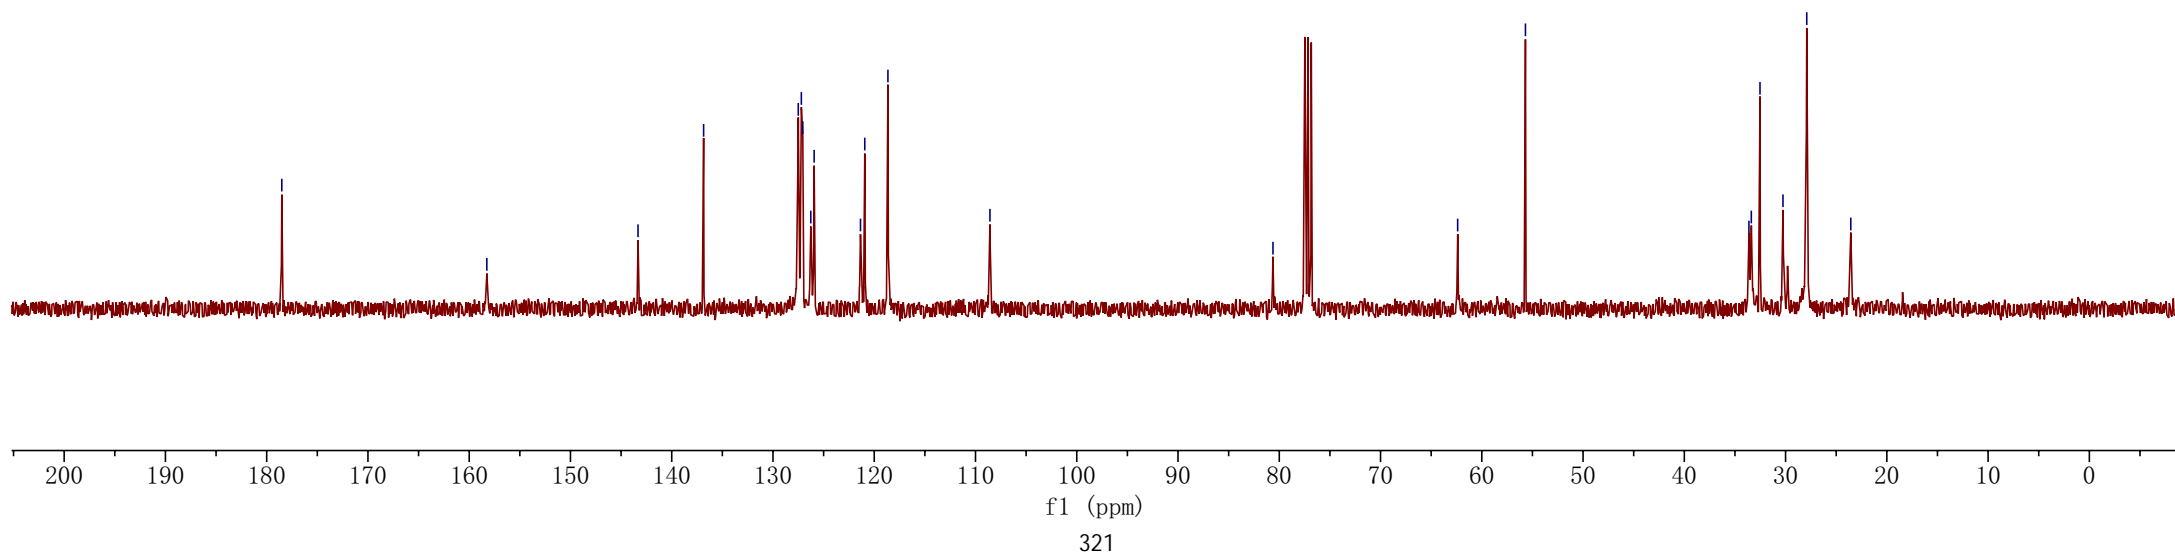

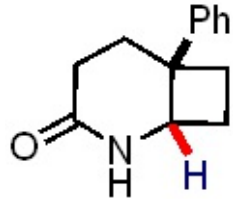

8e

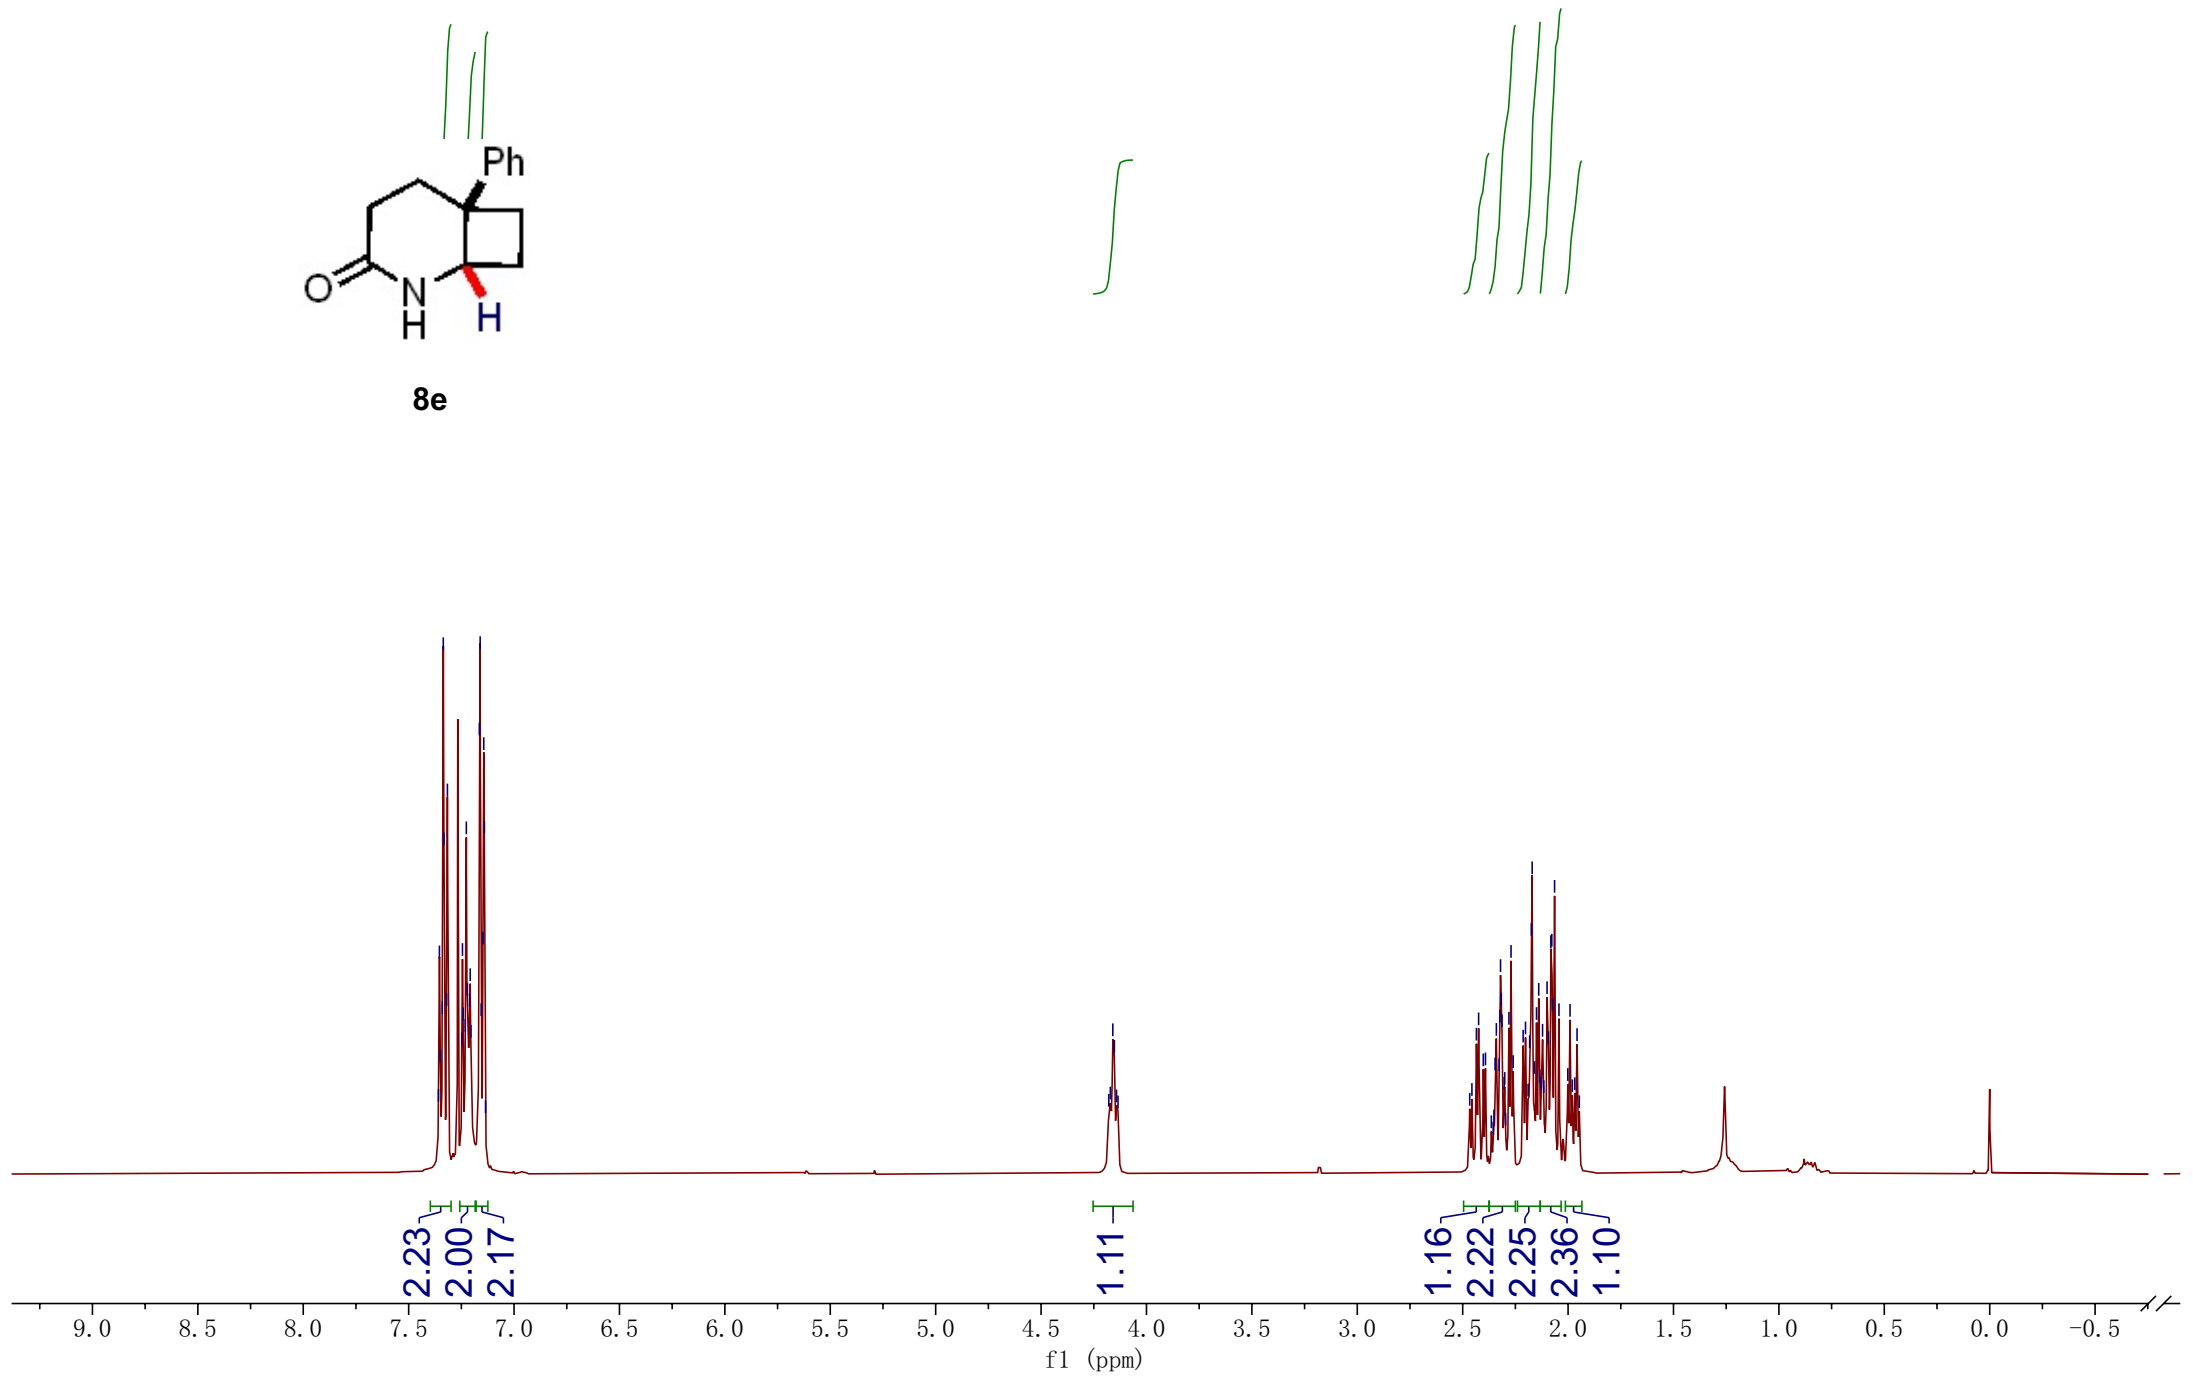

—173.51

—148.14

128.61  
128.59  
128.56  
128.53  
126.41  
125.26

—52.99

—44.40

32.94  
28.43  
28.09  
27.70

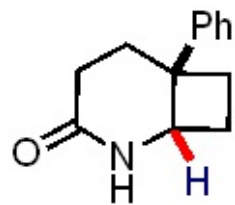

8e

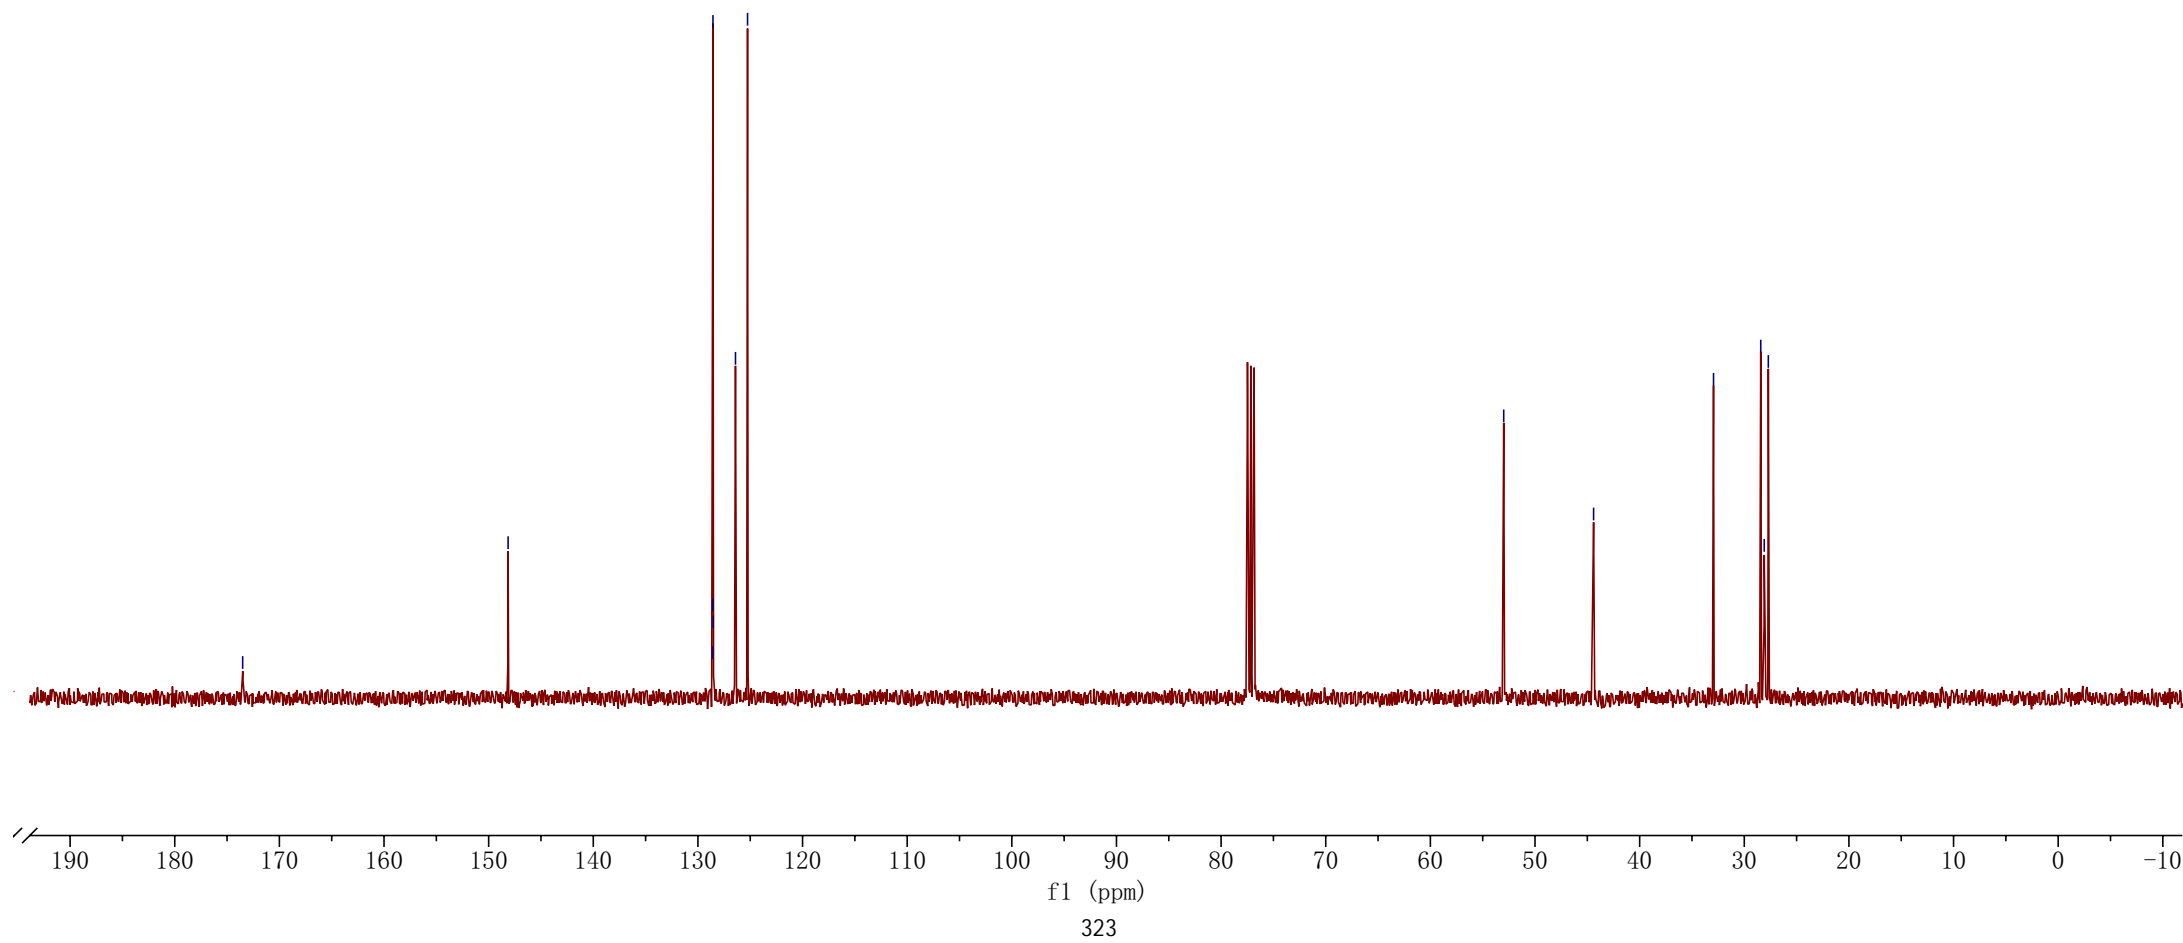

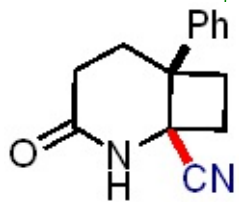

8f

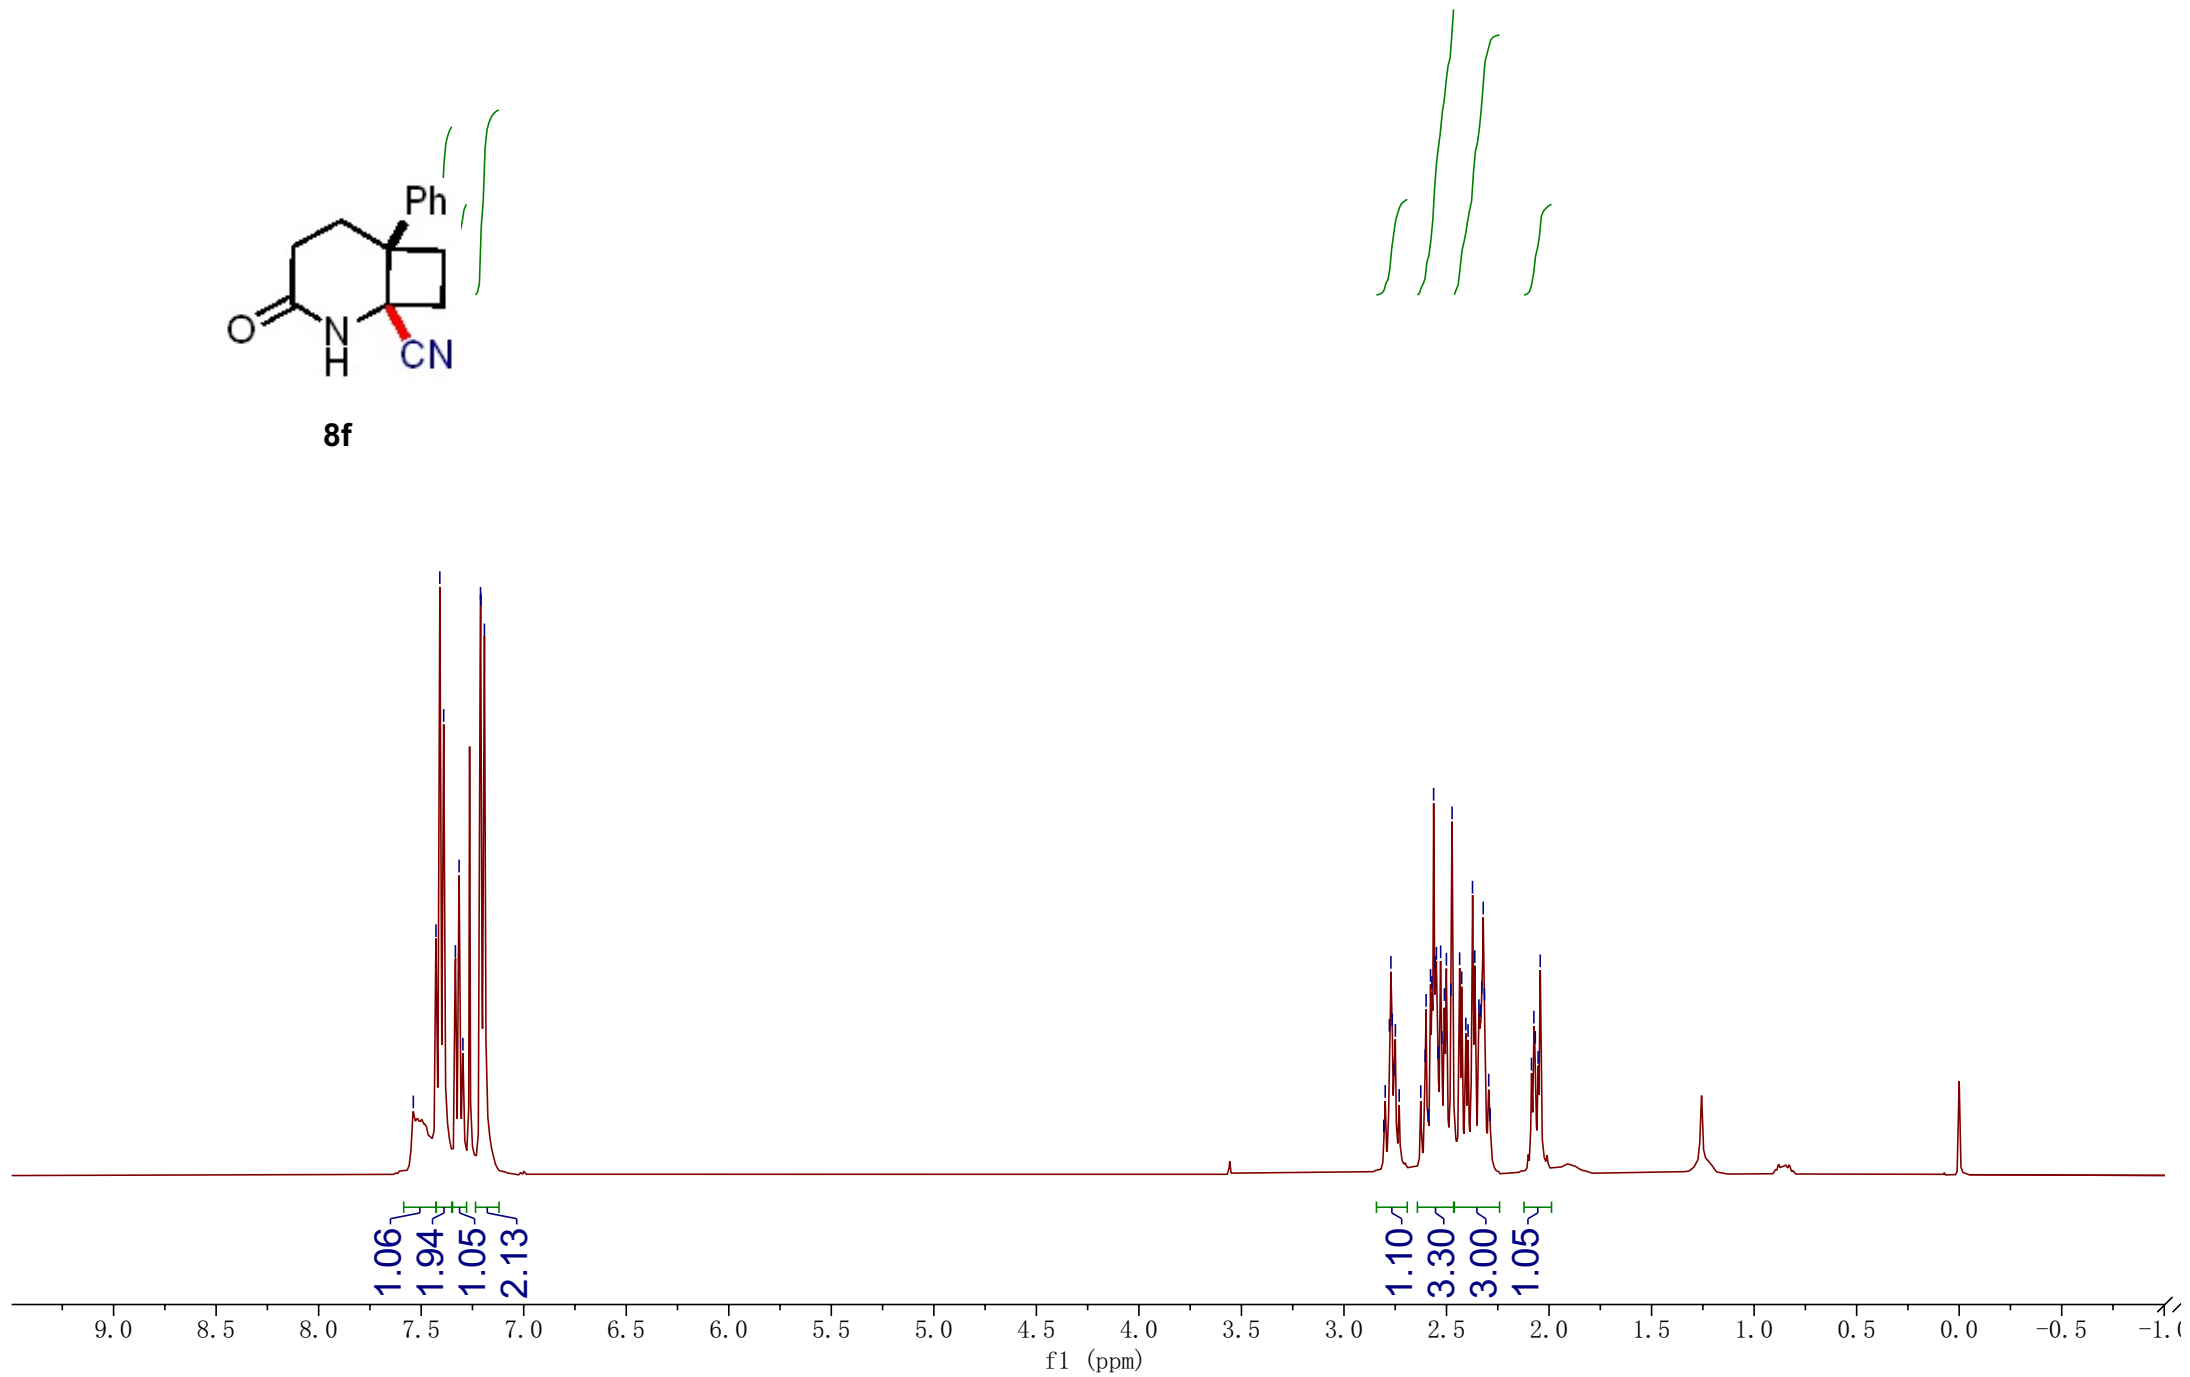

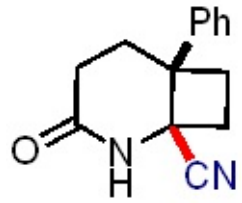

8f

—171.88

—143.37

∩128.79

∩127.60

∩125.50

∩119.63

—55.81

—48.03

∩34.31

∩33.79

∩27.30

∩27.12

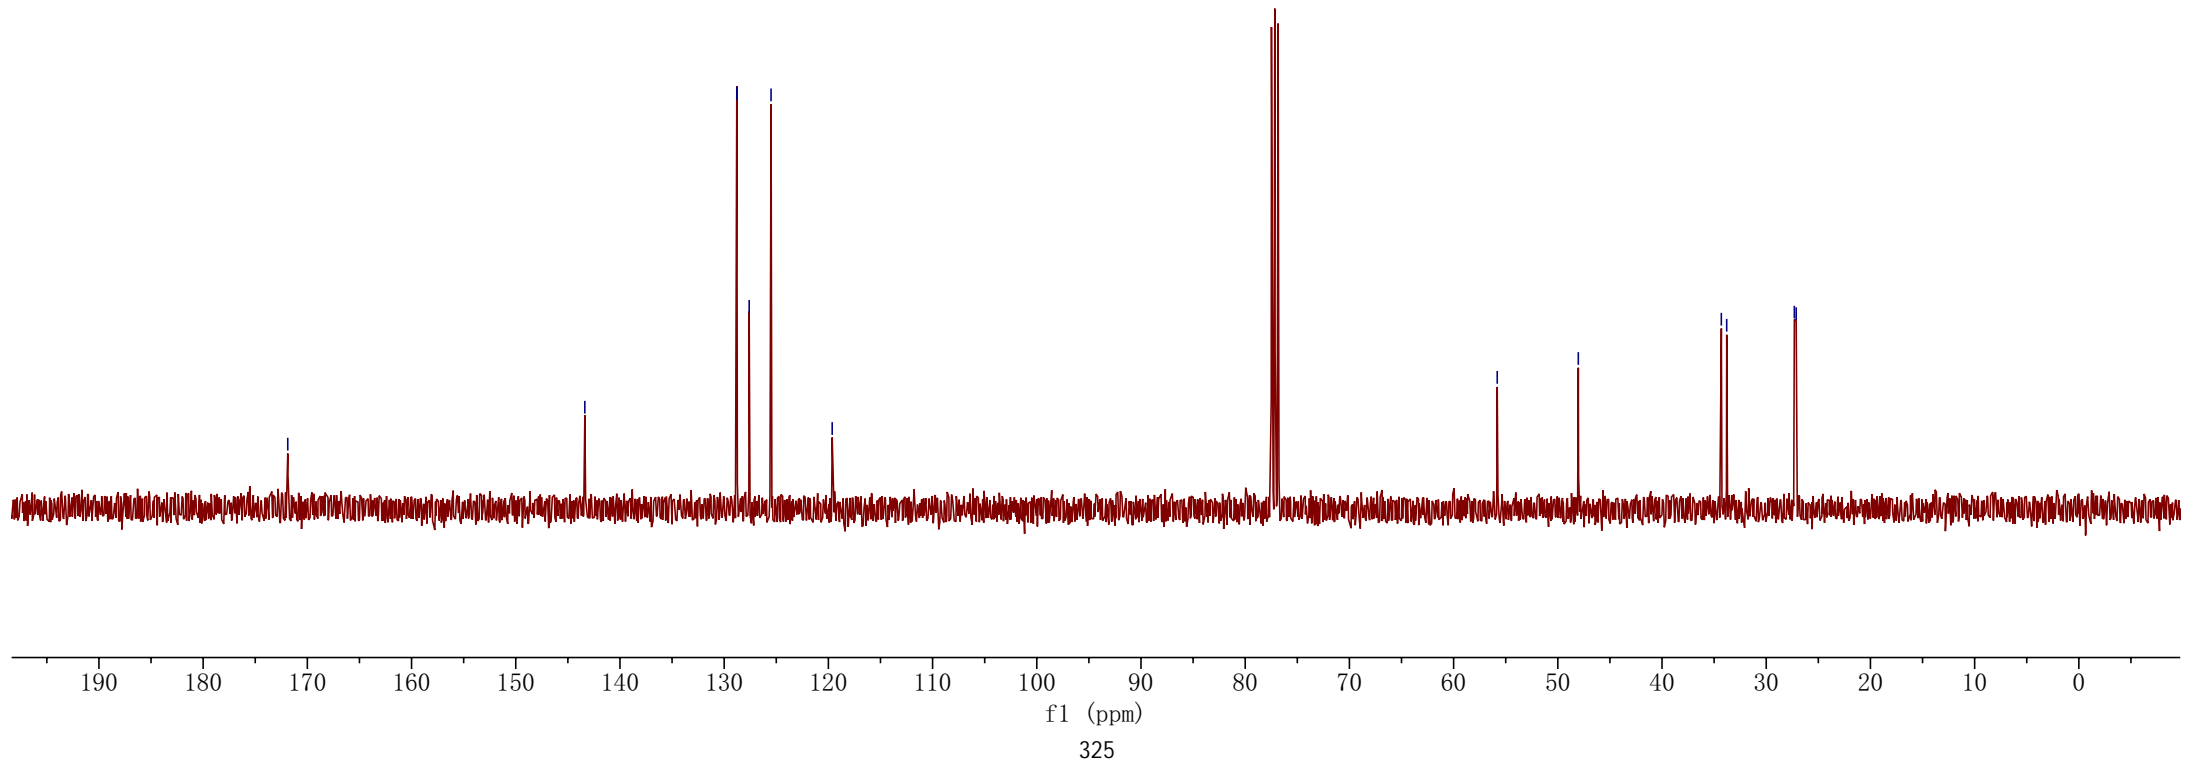

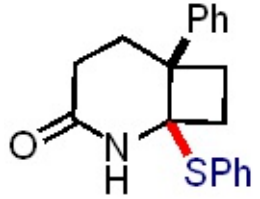

8g

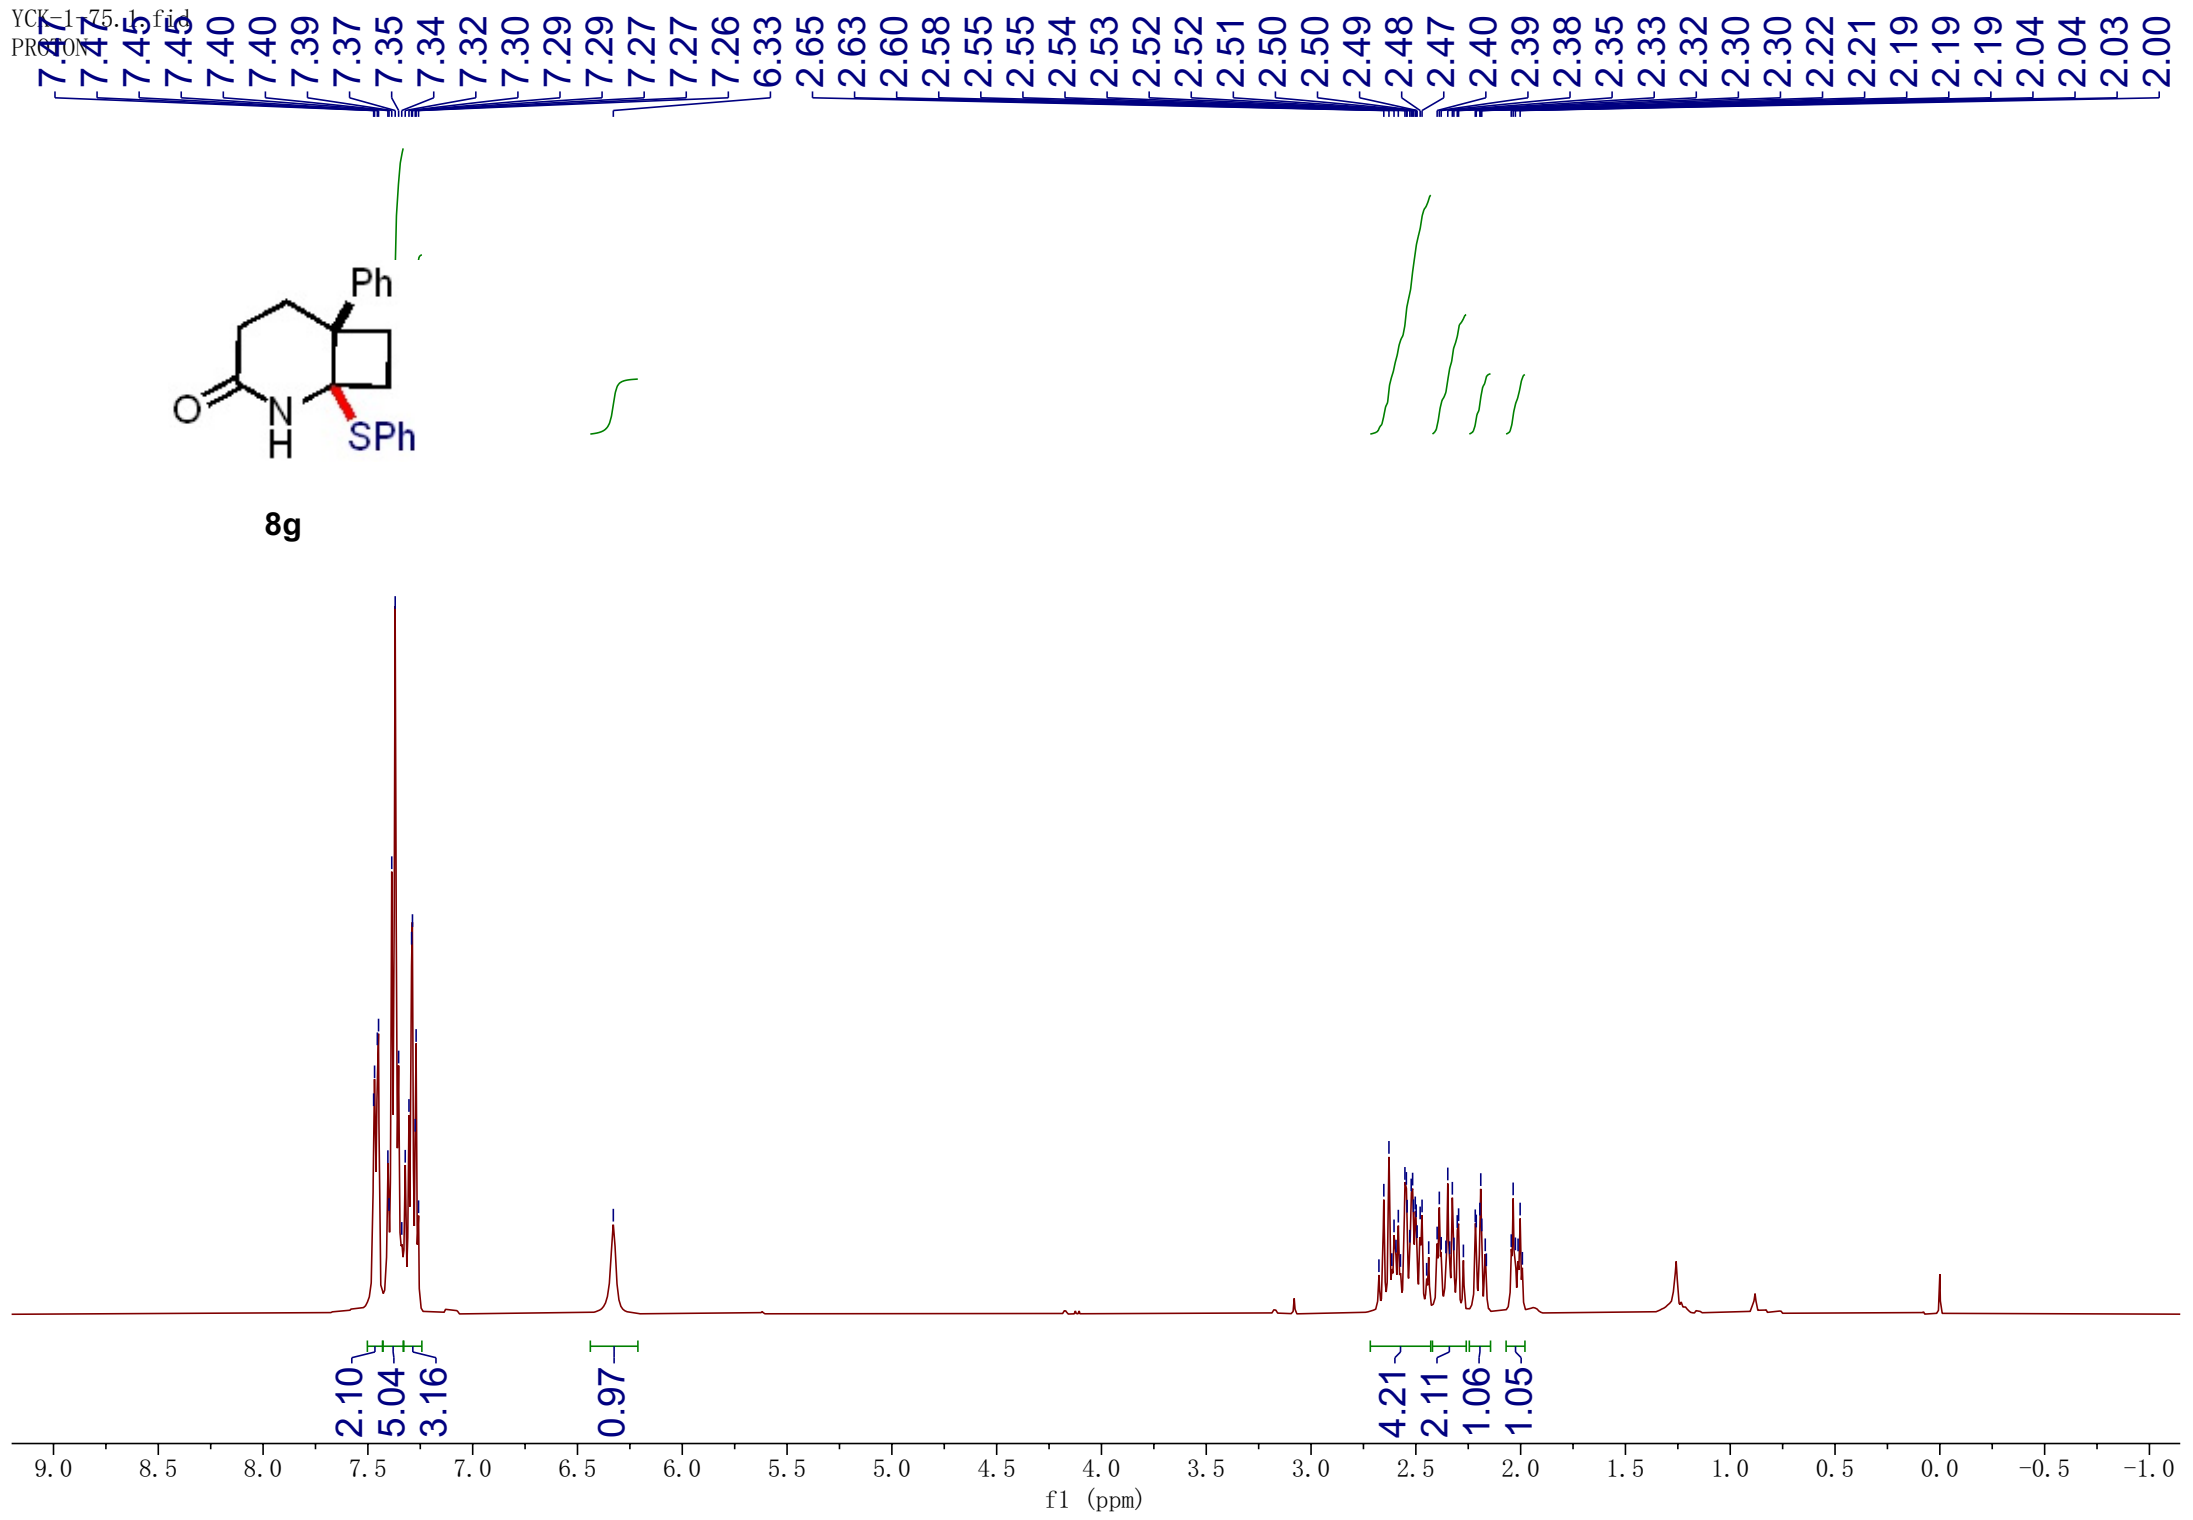

—171.18

143.34  
135.85  
131.19  
129.58  
129.32  
128.13  
127.12  
126.60

—69.26

—49.04

34.81  
34.77  
27.89  
27.19

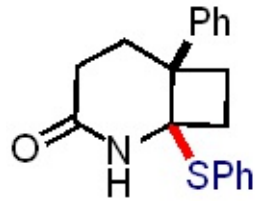

8g

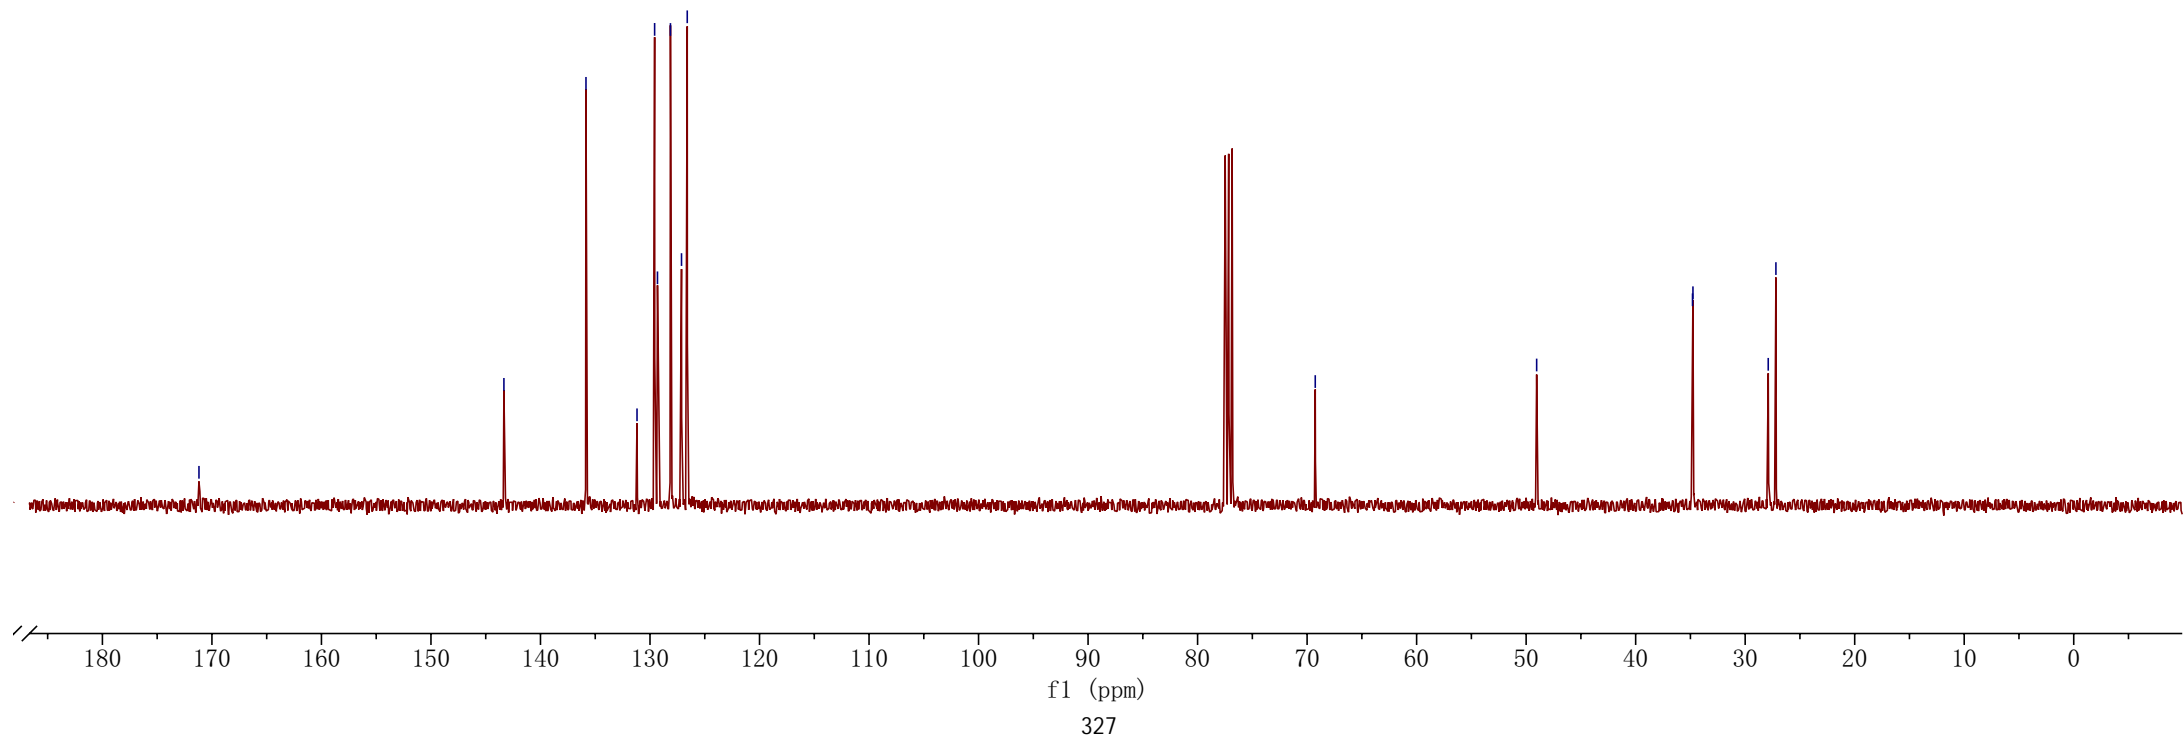

## 10. Checkcif of compound 3a, 4a, 5c, 5q, 6f, 7a, 7b, 7c

### checkCIF/PLATON report

Structure factors have been supplied for datablock(s) 37-mr-20250417a\_auto

THIS REPORT IS FOR GUIDANCE ONLY. IF USED AS PART OF A REVIEW PROCEDURE FOR PUBLICATION, IT SHOULD NOT REPLACE THE EXPERTISE OF AN EXPERIENCED CRYSTALLOGRAPHIC REFEREE.

No syntax errors found.      CIF dictionary      Interpreting this report

### Datablock: 37-mr-20250417a\_auto

---

Bond precision:      C-C = 0.0043 Å      Wavelength=0.71073

Cell:                      a=8.6158 (3)              b=17.4664 (6)              c=23.9834 (9)  
                                    alpha=90              beta=92.064 (3)              gamma=90

Temperature:              289 K

|                        | Calculated   | Reported     |
|------------------------|--------------|--------------|
| Volume                 | 3606.9 (2)   | 3606.8 (2)   |
| Space group            | P 21/n       | P 1 21/n 1   |
| Hall group             | -P 2yn       | -P 2yn       |
| Moiety formula         | C22 H22 N2 O | C22 H22 N2 O |
| Sum formula            | C22 H22 N2 O | C22 H22 N2 O |
| Mr                     | 330.42       | 330.41       |
| Dx, g cm <sup>-3</sup> | 1.217        | 1.217        |
| Z                      | 8            | 8            |
| Mu (mm <sup>-1</sup> ) | 0.075        | 0.075        |
| F000                   | 1408.0       | 1408.0       |
| F000'                  | 1408.52      |              |
| h, k, lmax             | 10, 21, 28   | 10, 21, 28   |
| Nref                   | 6611         | 6595         |
| Tmin, Tmax             | 0.983, 0.990 | 0.507, 1.000 |
| Tmin'                  | 0.983        |              |

Correction method= # Reported T Limits: Tmin=0.507 Tmax=1.000  
AbsCorr = MULTI-SCAN

Data completeness= 0.998                      Theta(max)= 25.349

R(reflections)= 0.0697 ( 5012)

wR2(reflections)=  
0.2051 ( 6595)

S = 1.034

Npar= 453

---

The following ALERTS were generated. Each ALERT has the format

**test-name\_ALERT\_alert-type\_alert-level.**

Click on the hyperlinks for more details of the test.

---

● **Alert level C**

DIFMX02\_ALERT\_1\_C The maximum difference density is > 0.1\*ZMAX\*0.75

The relevant atom site should be identified.

|                   |                                                       |        |        |
|-------------------|-------------------------------------------------------|--------|--------|
| PLAT094_ALERT_2_C | Ratio of Maximum / Minimum Residual Density ....      | 3.79   | Report |
| PLAT097_ALERT_2_C | Large Reported Max. (Positive) Residual Density       | 0.73   | eA-3   |
| PLAT220_ALERT_2_C | NonSolvent Resd 2 C Ueq(max)/Ueq(min) Range           | 3.7    | Ratio  |
| PLAT234_ALERT_4_C | Large Hirshfeld Difference C50 --C51 .                | 0.17   | Ang.   |
| PLAT340_ALERT_3_C | Low Bond Precision on C-C Bonds .....                 | 0.0043 | Ang.   |
| PLAT410_ALERT_2_C | Short Intra H...H Contact H37A ..H47 .                | 1.90   | Ang.   |
|                   | x,y,z =                                               | 1_555  | Check  |
| PLAT601_ALERT_2_C | Unit Cell Contains Solvent Accessible VOIDS <=        | 81     | Ang**3 |
| PLAT906_ALERT_3_C | Large K Value in the Analysis of Variance .....       | 15.816 | Check  |
| PLAT906_ALERT_3_C | Large K Value in the Analysis of Variance .....       | 3.135  | Check  |
| PLAT911_ALERT_3_C | Missing FCF Refl Between Thmin & STh/L= 0.600         | 12     | Report |
|                   | -1 0 1, -1 7 3, -9 7 4, 2 0 10, -9 0 15, -8 1 15,     |        |        |
|                   | -7 1 15, -8 0 16, -8 1 16, -8 2 16, -8 1 17, -8 2 17, |        |        |

---

● **Alert level G**

|                   |                                                            |       |          |
|-------------------|------------------------------------------------------------|-------|----------|
| PLAT007_ALERT_5_G | Number of Unrefined Donor-H Atoms .....                    | 2     | Report   |
|                   | H17 H42                                                    |       |          |
| PLAT072_ALERT_2_G | SHELXL First Parameter in WGHT Unusually Large             | 0.11  | Report   |
| PLAT793_ALERT_4_G | Model has Chirality at C10 (Centro SpGr)                   |       | R Verify |
| PLAT793_ALERT_4_G | Model has Chirality at C13 (Centro SpGr)                   |       | R Verify |
| PLAT793_ALERT_4_G | Model has Chirality at C35 (Centro SpGr)                   |       | R Verify |
| PLAT793_ALERT_4_G | Model has Chirality at C38 (Centro SpGr)                   |       | R Verify |
| PLAT910_ALERT_3_G | Missing # of FCF Reflection(s) Below Theta(Min).           | 4     | Note     |
|                   | 0 2 0, 0 1 1, 0 0 2, 0 1 2,                                |       |          |
| PLAT912_ALERT_4_G | Missing # of FCF Reflections Above STh/L= 0.600            | 1     | Note     |
| PLAT933_ALERT_2_G | Number of HKL-OMIT Records in Embedded .res File           | 11    | Note     |
|                   | -9 0 15, -9 1 15, -8 0 16, -8 1 15, -8 1 16, -8 1 17,      |       |          |
|                   | -8 2 16, -8 2 17, -7 1 15, -1 7 3, 2 0 10,                 |       |          |
| PLAT941_ALERT_3_G | Average HKL Measurement Multiplicity .....                 | 4.1   | Low      |
| PLAT969_ALERT_5_G | The 'Henn et al.' R-Factor-gap value .....                 | 8.368 | Note     |
|                   | Predicted wR2: Based on SigI**2 2.45 or SHELX Weight 19.84 |       |          |
| PLAT978_ALERT_2_G | Number C-C Bonds with Positive Residual Density.           | 7     | Info     |

---

0 **ALERT level A** = Most likely a serious problem - resolve or explain  
0 **ALERT level B** = A potentially serious problem, consider carefully  
11 **ALERT level C** = Check. Ensure it is not caused by an omission or oversight  
12 **ALERT level G** = General information/check it is not something unexpected

1 ALERT type 1 CIF construction/syntax error, inconsistent or missing data  
8 ALERT type 2 Indicator that the structure model may be wrong or deficient  
6 ALERT type 3 Indicator that the structure quality may be low  
6 ALERT type 4 Improvement, methodology, query or suggestion  
2 ALERT type 5 Informative message, check

---

It is advisable to attempt to resolve as many as possible of the alerts in all categories. Often the minor alerts point to easily fixed oversights, errors and omissions in your CIF or refinement strategy, so attention to these fine details can be worthwhile. In order to resolve some of the more serious problems it may be necessary to carry out additional measurements or structure refinements. However, the purpose of your study may justify the reported deviations and the more serious of these should normally be commented upon in the discussion or experimental section of a paper or in the "special\_details" fields of the CIF. checkCIF was carefully designed to identify outliers and unusual parameters, but every test has its limitations and alerts that are not important in a particular case may appear. Conversely, the absence of alerts does not guarantee there are no aspects of the results needing attention. It is up to the individual to critically assess their own results and, if necessary, seek expert advice.

### **Publication of your CIF in IUCr journals**

A basic structural check has been run on your CIF. These basic checks will be run on all CIFs submitted for publication in IUCr journals (*Acta Crystallographica*, *Journal of Applied Crystallography*, *Journal of Synchrotron Radiation*); however, if you intend to submit to *Acta Crystallographica Section C* or *E* or *IUCrData*, you should make sure that full publication checks are run on the final version of your CIF prior to submission.

### **Publication of your CIF in other journals**

Please refer to the *Notes for Authors* of the relevant journal for any special instructions relating to CIF submission.

---

**PLATON version of 02/02/2025; check.def file version of 02/02/2025**

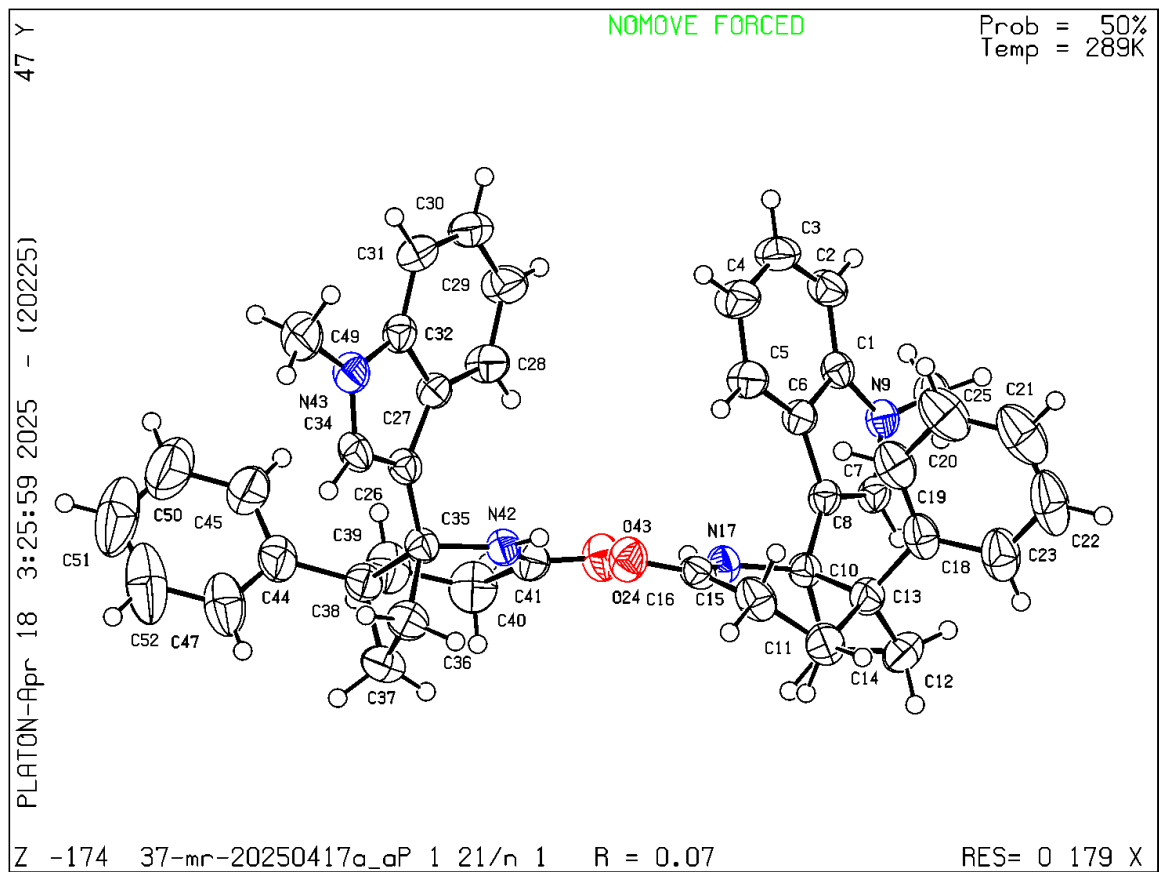

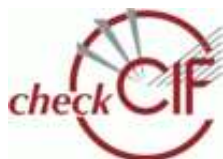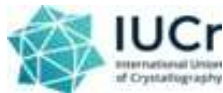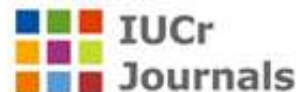

## checkCIF/PLATON report

Structure factors have been supplied for datablock(s) 38-cr-20250904c\_auto

THIS REPORT IS FOR GUIDANCE ONLY. IF USED AS PART OF A REVIEW PROCEDURE FOR PUBLICATION, IT SHOULD NOT REPLACE THE EXPERTISE OF AN EXPERIENCED CRYSTALLOGRAPHIC REFEREE.

No syntax errors found.      CIF dictionary      Interpreting this report

### Datablock: 38-cr-20250904c\_auto

---

|                        |                           |                                  |                           |
|------------------------|---------------------------|----------------------------------|---------------------------|
| Bond precision:        | C-C = 0.0033 Å            | Wavelength=1.54184               |                           |
| Cell:                  | a=31.6097 (7)<br>alpha=90 | b=9.6001 (2)<br>beta=107.260 (2) | c=30.3578 (6)<br>gamma=90 |
| Temperature:           | 100 K                     |                                  |                           |
|                        | Calculated                | Reported                         |                           |
| Volume                 | 8797.4 (3)                | 8797.4 (3)                       |                           |
| Space group            | C 2/c                     | C 1 2/c 1                        |                           |
| Hall group             | -C 2yc                    | -C 2yc                           |                           |
| Moiety formula         | 2(C26 H26 N2 O2), C H C13 | C26 H26 N2 O2, 0.5(C H C13)      |                           |
| Sum formula            | C53 H53 C13 N4 O4         | C26.50 H26.50 C11.50 N2 O2       |                           |
| Mr                     | 916.34                    | 458.17                           |                           |
| Dx, g cm <sup>-3</sup> | 1.384                     | 1.384                            |                           |
| Z                      | 8                         | 16                               |                           |
| Mu (mm <sup>-1</sup> ) | 2.312                     | 2.312                            |                           |
| F000                   | 3856.0                    | 3856.0                           |                           |
| F000'                  | 3874.50                   |                                  |                           |
| h, k, lmax             | 39, 12, 38                | 39, 11, 38                       |                           |
| Nref                   | 9220                      | 8925                             |                           |
| Tmin, Tmax             | 0.661, 0.723              | 0.628, 1.000                     |                           |
| Tmin'                  | 0.600                     |                                  |                           |

Correction method= # Reported T Limits: Tmin=0.628 Tmax=1.000  
AbsCorr = MULTI-SCAN

Data completeness= 0.968

Theta(max)= 76.373

R(reflections)= 0.0591( 7688)

wR2(reflections)=  
0.1775( 8925)

S = 1.077

Npar= 581

---

The following ALERTS were generated. Each ALERT has the format

**test-name\_ALERT\_alert-type\_alert-level.**

Click on the hyperlinks for more details of the test.

---

### ● Alert level C

|                   |                                                       |                |              |
|-------------------|-------------------------------------------------------|----------------|--------------|
| PLAT041_ALERT_1_C | Calc. and Reported SumFormula                         | Strings Differ | Please Check |
|                   | Calc: C53 H53 Cl3 N4 O4                               |                |              |
|                   | Rep.: C26.50 H26.50 Cl1.50 N2 O2                      |                |              |
| PLAT042_ALERT_1_C | Calc. and Reported MoietyFormula                      | Strings Differ | Please Check |
|                   | Calc: 2(C26 H26 N2 O2), C H Cl3                       |                |              |
|                   | Rep.: C26 H26 N2 O2, 0.5(C H Cl3)                     |                |              |
| PLAT244_ALERT_4_C | Low 'Solvent' Ueq as Compared to Neighbors of         |                | C2 Check     |
| PLAT250_ALERT_2_C | Large U3/U1 Ratio for <U(i,j)> Tensor(Resd            | 1)             | 2.1 Note     |
| PLAT250_ALERT_2_C | Large U3/U1 Ratio for <U(i,j)> Tensor(Resd            | 2)             | 2.5 Note     |
| PLAT410_ALERT_2_C | Short Intra H...H Contact H11B                        | ..H33          | 1.97 Ang.    |
|                   |                                                       | x,y,z =        | 1_555 Check  |
| PLAT410_ALERT_2_C | Short Intra H...H Contact H55A                        | ..H62          | 1.97 Ang.    |
|                   |                                                       | x,y,z =        | 1_555 Check  |
| PLAT911_ALERT_3_C | Missing FCF Refl Between Thmin & STh/L=               | 0.600          | 115 Report   |
|                   | 1 11 0, 3 11 0, 5 11 0, 6 0 0, -5 11 1, -3 11 1,      |                |              |
|                   | -1 11 1, 1 11 1, 3 11 1, -17 9 2, -10 10 2, -7 11 2,  |                |              |
|                   | -5 11 2, -3 11 2, -1 11 2, 1 11 2, 3 11 2, 8 10 2,    |                |              |
|                   | 32 0 2, -25 7 3, -10 10 3, -9 11 3, -7 11 3, -5 11 3, |                |              |
|                   | -3 11 3, -1 11 3, 1 11 3, 3 11 3, 8 10 3, -25 7 4,    |                |              |
|                   | ( 85 More Missing: see the .ckf listing file)         |                |              |

---

### ● Alert level G

|                   |                                                  |               |             |
|-------------------|--------------------------------------------------|---------------|-------------|
| PLAT002_ALERT_2_G | Number of Distance or Angle Restraints on AtSite |               | 2 Note      |
| PLAT007_ALERT_5_G | Number of Unrefined Donor-H Atoms .....          |               | 1 Report    |
|                   | H60                                              |               |             |
| PLAT045_ALERT_1_G | Calculated and Reported Z Differ by a Factor ... |               | 0.500 Check |
| PLAT083_ALERT_2_G | SHELXL Second Parameter in WGHT Unusually Large  |               | 17.26 Why ? |
| PLAT172_ALERT_4_G | The CIF-Embedded .res File Contains DFIX Records |               | 1 Report    |
| PLAT431_ALERT_2_G | Short Inter HL..A Contact Cl4                    | ..O68         | 2.96 Ang.   |
|                   |                                                  | -x,y,1/2-z =  | 2_555 Check |
| PLAT790_ALERT_4_G | Centre of Gravity not Within Unit Cell: Resd. #  |               | 3 Note      |
|                   | C H Cl3                                          |               |             |
| PLAT793_ALERT_4_G | Model has Chirality at C9                        | (Centro SpGr) | R Verify    |
| PLAT793_ALERT_4_G | Model has Chirality at C12                       | (Centro SpGr) | S Verify    |
| PLAT793_ALERT_4_G | Model has Chirality at C21                       | (Centro SpGr) | S Verify    |
| PLAT793_ALERT_4_G | Model has Chirality at C39                       | (Centro SpGr) | R Verify    |
| PLAT793_ALERT_4_G | Model has Chirality at C53                       | (Centro SpGr) | S Verify    |
| PLAT793_ALERT_4_G | Model has Chirality at C56                       | (Centro SpGr) | R Verify    |
| PLAT860_ALERT_3_G | Number of Least-Squares Restraints .....         |               | 1 Note      |
| PLAT912_ALERT_4_G | Missing # of FCF Reflections Above STh/L=        | 0.600         | 160 Note    |
| PLAT941_ALERT_3_G | Average HKL Measurement Multiplicity .....       |               | 3.8 Low     |

PLAT969\_ALERT\_5\_G The 'Henn et al.' R-Factor-gap value ..... 3.425 Note  
Predicted wR2: Based on SigI\*\*2 5.18 or SHELX Weight 16.48  
PLAT978\_ALERT\_2\_G Number C-C Bonds with Positive Residual Density. 13 Info

---

0 **ALERT level A** = Most likely a serious problem - resolve or explain  
0 **ALERT level B** = A potentially serious problem, consider carefully  
8 **ALERT level C** = Check. Ensure it is not caused by an omission or oversight  
18 **ALERT level G** = General information/check it is not something unexpected

3 ALERT type 1 CIF construction/syntax error, inconsistent or missing data  
8 ALERT type 2 Indicator that the structure model may be wrong or deficient  
3 ALERT type 3 Indicator that the structure quality may be low  
10 ALERT type 4 Improvement, methodology, query or suggestion  
2 ALERT type 5 Informative message, check

---

It is advisable to attempt to resolve as many as possible of the alerts in all categories. Often the minor alerts point to easily fixed oversights, errors and omissions in your CIF or refinement strategy, so attention to these fine details can be worthwhile. It is up to the individual to critically assess their own results and, if necessary, seek expert advice.

---

**PLATON version of 04/06/2025; check.def file version of 30/05/2025**

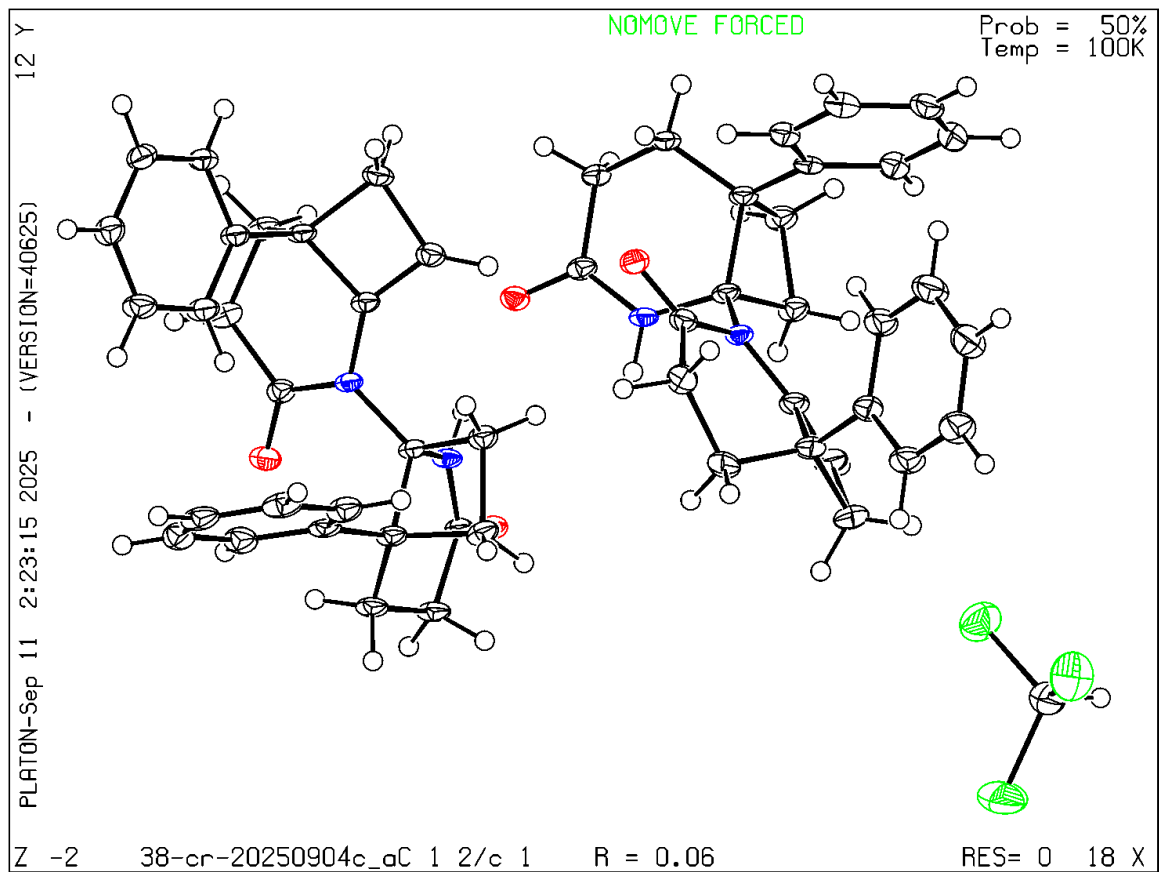



## checkCIF/PLATON report

Structure factors have been supplied for datablock(s) 38-cr-20250908f\_auto

THIS REPORT IS FOR GUIDANCE ONLY. IF USED AS PART OF A REVIEW PROCEDURE FOR PUBLICATION, IT SHOULD NOT REPLACE THE EXPERTISE OF AN EXPERIENCED CRYSTALLOGRAPHIC REFEREE.

No syntax errors found.      CIF dictionary      Interpreting this report

### Datablock: 38-cr-20250908f\_auto

---

Bond precision:    C-C = 0.0019 Å

Wavelength=1.54184

Cell:                    a=8.5198 (2)                    b=9.5021 (2)                    c=16.2326 (4)  
                          alpha=96.133 (2)                beta=93.496 (2)                gamma=107.290 (2)  
Temperature:            100 K

|                        | Calculated            | Reported              |
|------------------------|-----------------------|-----------------------|
| Volume                 | 1241.60 (5)           | 1241.60 (5)           |
| Space group            | P -1                  | P -1                  |
| Hall group             | -P 1                  | -P 1                  |
| Moiety formula         | C27 H24 N2 O, C H Cl3 | C27 H24 N2 O, C H Cl3 |
| Sum formula            | C28 H25 Cl3 N2 O      | C28 H25 Cl3 N2 O      |
| Mr                     | 511.85                | 511.85                |
| Dx, g cm <sup>-3</sup> | 1.369                 | 1.369                 |
| Z                      | 2                     | 2                     |
| Mu (mm <sup>-1</sup> ) | 3.528                 | 3.528                 |
| F000                   | 532.0                 | 532.0                 |
| F000'                  | 535.37                |                       |
| h, k, lmax             | 10, 11, 20            | 10, 11, 20            |
| Nref                   | 5081                  | 4984                  |
| Tmin, Tmax             | 0.606, 0.703          | 0.721, 1.000          |
| Tmin'                  | 0.505                 |                       |

Correction method= # Reported T Limits: Tmin=0.721 Tmax=1.000  
AbsCorr = MULTI-SCAN

Data completeness= 0.981

Theta(max)= 74.519

R(reflections)= 0.0343( 4780)

wR2(reflections)=  
0.0919( 4984)

S = 1.045

Npar= 331

---

The following ALERTS were generated. Each ALERT has the format

**test-name\_ALERT\_alert-type\_alert-level.**

Click on the hyperlinks for more details of the test.

---

**Alert level B**

PLAT410\_ALERT\_2\_B Short Intra H...H Contact H5B ..H27 . 1.88 Ang.  
x,y,z = 1\_555 Check

---

**Alert level C**

PLAT244\_ALERT\_4\_C Low 'Solvent' Ueq as Compared to Neighbors of C28 Check  
PLAT420\_ALERT\_2\_C D-H Bond Without Acceptor N1 --H1 . Please Check  
PLAT911\_ALERT\_3\_C Missing FCF Refl Between Thmin & STh/L= 0.600 39 Report  
1 1 0, -5 10 0, -4 10 0, -5 11 0, -4 11 0, -3 11 0,  
3-11 1, 4-11 1, 5-11 1, 4-10 1, 6 -2 1, -7 10 1,  
-6 10 1, -5 10 1, -4 10 1, -5 11 1, -4 11 1, -3 11 1,  
3-11 2, 4-11 2, 5-11 2, -6 10 2, -5 10 2, -4 10 2,  
-4 11 2, -3 11 2, -2 11 2, 4-11 3, 5-11 3, -6 10 3,  
( 9 More Missing: see the .ckf listing file)

---

**Alert level G**

PLAT002\_ALERT\_2\_G Number of Distance or Angle Restraints on AtSite 5 Note  
PLAT003\_ALERT\_2\_G Number of Uiso or U(i,j) Restrained non-H-Atoms 4 Report  
PLAT007\_ALERT\_5\_G Number of Unrefined Donor-H Atoms ..... 1 Report  
H2  
PLAT154\_ALERT\_1\_G The s.u.'s on the Cell Angles are Equal ..(Note) 0.002 Degree  
PLAT172\_ALERT\_4\_G The CIF-Embedded .res File Contains DFIX Records 2 Report  
PLAT186\_ALERT\_4\_G The CIF-Embedded .res File Contains ISOR Records 1 Report  
PLAT302\_ALERT\_4\_G Anion/Solvent/Minor-Residue Disorder (Resd 2) 50% Note  
PLAT793\_ALERT\_4\_G Model has Chirality at C4 (Centro SpGr) S Verify  
PLAT793\_ALERT\_4\_G Model has Chirality at C7 (Centro SpGr) S Verify  
PLAT860\_ALERT\_3\_G Number of Least-Squares Restraints ..... 30 Note  
PLAT910\_ALERT\_3\_G Missing FCF Reflection(s) Below Theta(Min) [Deg]=  
0 0 1, 4.92 Note  
PLAT912\_ALERT\_4\_G Missing # of FCF Reflections Above STh/L= 0.600 57 Note  
PLAT941\_ALERT\_3\_G Average HKL Measurement Multiplicity ..... 4.1 Low  
PLAT969\_ALERT\_5\_G The 'Henn et al.' R-Factor-gap value ..... 5.140 Note  
Predicted wR2: Based on SigI\*\*2 1.79 or SHELX Weight 8.80  
PLAT978\_ALERT\_2\_G Number C-C Bonds with Positive Residual Density. 21 Info

---

- 0 **ALERT level A** = Most likely a serious problem - resolve or explain  
1 **ALERT level B** = A potentially serious problem, consider carefully  
3 **ALERT level C** = Check. Ensure it is not caused by an omission or oversight  
15 **ALERT level G** = General information/check it is not something unexpected

1 ALERT type 1 CIF construction/syntax error, inconsistent or missing data  
5 ALERT type 2 Indicator that the structure model may be wrong or deficient  
4 ALERT type 3 Indicator that the structure quality may be low  
7 ALERT type 4 Improvement, methodology, query or suggestion  
2 ALERT type 5 Informative message, check

---

---

It is advisable to attempt to resolve as many as possible of the alerts in all categories. Often the minor alerts point to easily fixed oversights, errors and omissions in your CIF or refinement strategy, so attention to these fine details can be worthwhile. It is up to the individual to critically assess their own results and, if necessary, seek expert advice.

---

**PLATON version of 26/09/2025; check.def file version of 20/09/2025**

---

## **duplicate check**

**No duplication found**

---

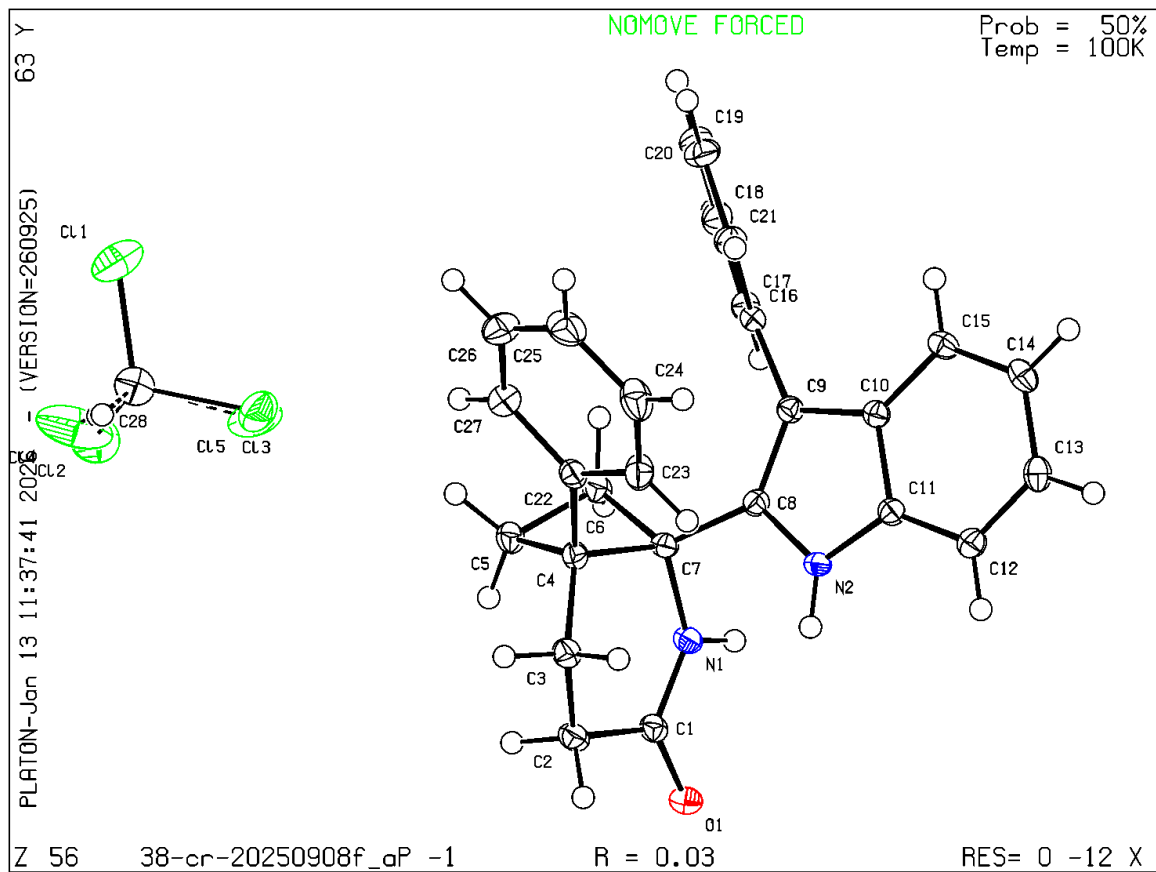

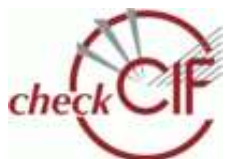

## checkCIF/PLATON report

Structure factors have been supplied for datablock(s) 37-mr-20251210a\_auto

THIS REPORT IS FOR GUIDANCE ONLY. IF USED AS PART OF A REVIEW PROCEDURE FOR PUBLICATION, IT SHOULD NOT REPLACE THE EXPERTISE OF AN EXPERIENCED CRYSTALLOGRAPHIC REFEREE.

No syntax errors found.      CIF dictionary      Interpreting this report

### Datablock: 37-mr-20251210a\_auto

---

Bond precision:    C-C = 0.0016 Å

Wavelength=0.71073

Cell:            a=8.39519(16)            b=10.29504(19)            c=11.8860(2)  
                  alpha=109.1083(16)    beta=104.1951(16)    gamma=99.0491(15)  
Temperature:    100 K

|                        | Calculated   | Reported     |
|------------------------|--------------|--------------|
| Volume                 | 908.86(3)    | 908.86(3)    |
| Space group            | P -1         | P -1         |
| Hall group             | -P 1         | -P 1         |
| Moiety formula         | C22 H25 N O4 | C22 H25 N O4 |
| Sum formula            | C22 H25 N O4 | C22 H25 N O4 |
| Mr                     | 367.43       | 367.43       |
| Dx, g cm <sup>-3</sup> | 1.343        | 1.343        |
| Z                      | 2            | 2            |
| Mu (mm <sup>-1</sup> ) | 0.092        | 0.092        |
| F000                   | 392.0        | 392.0        |
| F000'                  | 392.19       |              |
| h, k, lmax             | 11, 14, 16   | 11, 14, 16   |
| Nref                   | 5102         | 5017         |
| Tmin, Tmax             | 0.974, 0.980 | 0.695, 1.000 |
| Tmin'                  | 0.969        |              |

Correction method= # Reported T Limits: Tmin=0.695 Tmax=1.000  
AbsCorr = MULTI-SCAN

Data completeness= 0.983

Theta(max)= 29.574

R(reflections)= 0.0395( 4308)

wR2(reflections)=  
0.1104( 5017)

S = 1.064

Npar= 251

---

The following ALERTS were generated. Each ALERT has the format

**test-name\_ALERT\_alert-type\_alert-level.**

Click on the hyperlinks for more details of the test.

---

| ● Alert level G   |                                                                            |            |
|-------------------|----------------------------------------------------------------------------|------------|
| PLAT793_ALERT_4_G | Model has Chirality at C4 (Centro SpGr)                                    | S Verify   |
| PLAT793_ALERT_4_G | Model has Chirality at C5 (Centro SpGr)                                    | S Verify   |
| PLAT910_ALERT_3_G | Missing FCF Reflection(s) Below Theta(Min) [Deg]=<br>0 1 0, 0 -1 1, 0 0 1, | 2.59 Note  |
| PLAT912_ALERT_4_G | Missing # of FCF Reflections Above STh/L= 0.600                            | 82 Note    |
| PLAT933_ALERT_2_G | Number of HKL-OMIT Records in Embedded .res File<br>0 -1 1, 0 0 1, 0 1 0,  | 3 Note     |
| PLAT941_ALERT_3_G | Average HKL Measurement Multiplicity .....                                 | 4.5 Low    |
| PLAT969_ALERT_5_G | The 'Henn et al.' R-Factor-gap value .....                                 | 3.209 Note |
|                   | Predicted wR2: Based on SigI**2 3.44 or SHELX Weight 10.38                 |            |
| PLAT978_ALERT_2_G | Number C-C Bonds with Positive Residual Density.                           | 21 Info    |

---

- 0 **ALERT level A** = Most likely a serious problem - resolve or explain
- 0 **ALERT level B** = A potentially serious problem, consider carefully
- 0 **ALERT level C** = Check. Ensure it is not caused by an omission or oversight
- 8 **ALERT level G** = General information/check it is not something unexpected

- 0 ALERT type 1 CIF construction/syntax error, inconsistent or missing data
  - 2 ALERT type 2 Indicator that the structure model may be wrong or deficient
  - 2 ALERT type 3 Indicator that the structure quality may be low
  - 3 ALERT type 4 Improvement, methodology, query or suggestion
  - 1 ALERT type 5 Informative message, check
- 

It is advisable to attempt to resolve as many as possible of the alerts in all categories. Often the minor alerts point to easily fixed oversights, errors and omissions in your CIF or refinement strategy, so attention to these fine details can be worthwhile. It is up to the individual to critically assess their own results and, if necessary, seek expert advice.

---

**PLATON version of 26/09/2025; check.def file version of 20/09/2025**

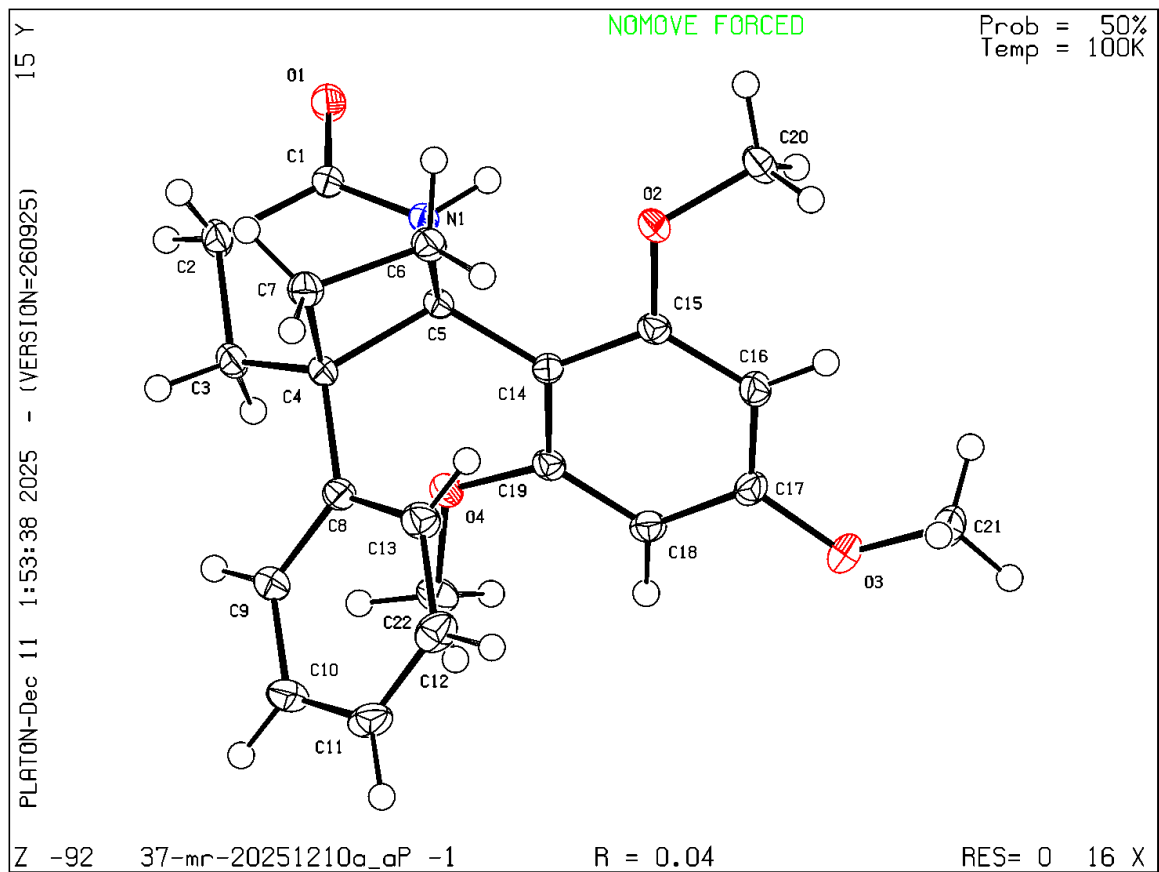



## checkCIF/PLATON report

Structure factors have been supplied for datablock(s) 37-mr-20251208a

THIS REPORT IS FOR GUIDANCE ONLY. IF USED AS PART OF A REVIEW PROCEDURE FOR PUBLICATION, IT SHOULD NOT REPLACE THE EXPERTISE OF AN EXPERIENCED CRYSTALLOGRAPHIC REFEREE.

No syntax errors found.      CIF dictionary      Interpreting this report

### Datablock: 37-mr-20251208a

---

|                        |                          |                                   |                           |
|------------------------|--------------------------|-----------------------------------|---------------------------|
| Bond precision:        | C-C = 0.0056 Å           | Wavelength=0.71073                |                           |
| Cell:                  | a=7.2460 (3)<br>alpha=90 | b=12.2378 (4)<br>beta=100.138 (4) | c=18.5684 (8)<br>gamma=90 |
| Temperature:           | 100 K                    |                                   |                           |
|                        | Calculated               | Reported                          |                           |
| Volume                 | 1620.85 (11)             | 1620.85 (11)                      |                           |
| Space group            | P 21/c                   | P 1 21/c 1                        |                           |
| Hall group             | -P 2ybc                  | -P 2ybc                           |                           |
| Moiety formula         | C19 H18 N2 O4            | C19 H18 N2 O4                     |                           |
| Sum formula            | C19 H18 N2 O4            | C19 H18 N2 O4                     |                           |
| Mr                     | 338.35                   | 338.35                            |                           |
| Dx, g cm <sup>-3</sup> | 1.387                    | 1.387                             |                           |
| Z                      | 4                        | 4                                 |                           |
| Mu (mm <sup>-1</sup> ) | 0.098                    | 0.098                             |                           |
| F000                   | 712.0                    | 712.0                             |                           |
| F000'                  | 712.35                   |                                   |                           |
| h, k, lmax             | 9, 15, 23                | 9, 15, 23                         |                           |
| Nref                   | 3314                     | 3313                              |                           |
| Tmin, Tmax             | 0.978, 0.987             | 0.515, 1.000                      |                           |
| Tmin'                  | 0.978                    |                                   |                           |

Correction method= # Reported T Limits: Tmin=0.515 Tmax=1.000  
AbsCorr = MULTI-SCAN

Data completeness= 1.000

Theta(max)= 26.372

R(reflections)= 0.0852( 3068)

wR2(reflections)=  
0.1946( 3313)

S = 1.296

Npar= 230

---

The following ALERTS were generated. Each ALERT has the format

**test-name\_ALERT\_alert-type\_alert-level.**

Click on the hyperlinks for more details of the test.

---

● **Alert level C**

|                   |                                                  |    |        |       |
|-------------------|--------------------------------------------------|----|--------|-------|
| PLAT250_ALERT_2_C | Large U3/U1 Ratio for <U(i,j)> Tensor(Resd       | 1) | 2.1    | Note  |
| PLAT340_ALERT_3_C | Low Bond Precision on C-C Bonds .....            |    | 0.0056 | Ang.  |
| PLAT411_ALERT_2_C | Short Inter H...H Contact H8B ..H15 .            |    | 2.13   | Ang.  |
|                   | 1-x,1/2+y,1/2-z =                                |    | 2_655  | Check |
| PLAT906_ALERT_3_C | Large K Value in the Analysis of Variance .....  |    | 12.775 | Check |
| PLAT906_ALERT_3_C | Large K Value in the Analysis of Variance .....  |    | 3.373  | Check |
| PLAT918_ALERT_3_C | Reflection(s) with I(obs) much Smaller I(calc) . |    | 1      | Check |
|                   | 0 0 2,                                           |    |        |       |

---

● **Alert level G**

|                   |                                                            |  |       |        |
|-------------------|------------------------------------------------------------|--|-------|--------|
| PLAT083_ALERT_2_G | SHELXL Second Parameter in WGHT Unusually Large            |  | 6.30  | Why ?  |
| PLAT793_ALERT_4_G | Model has Chirality at C7 (Centro SpGr)                    |  | R     | Verify |
| PLAT793_ALERT_4_G | Model has Chirality at C11 (Centro SpGr)                   |  | S     | Verify |
| PLAT910_ALERT_3_G | Missing FCF Reflection(s) Below Theta(Min) [Deg]=          |  | 2.23  | Note   |
|                   | 0 1 1,                                                     |  |       |        |
| PLAT933_ALERT_2_G | Number of HKL-OMIT Records in Embedded .res File           |  | 1     | Note   |
|                   | 0 1 1,                                                     |  |       |        |
| PLAT941_ALERT_3_G | Average HKL Measurement Multiplicity .....                 |  | 3.8   | Low    |
| PLAT969_ALERT_5_G | The 'Henn et al.' R-Factor-gap value .....                 |  | 5.448 | Note   |
|                   | Predicted wR2: Based on SigI**2 3.57 or SHELX Weight 15.01 |  |       |        |
| PLAT978_ALERT_2_G | Number C-C Bonds with Positive Residual Density.           |  | 1     | Info   |

---

0 **ALERT level A** = Most likely a serious problem - resolve or explain  
0 **ALERT level B** = A potentially serious problem, consider carefully  
6 **ALERT level C** = Check. Ensure it is not caused by an omission or oversight  
8 **ALERT level G** = General information/check it is not something unexpected

0 ALERT type 1 CIF construction/syntax error, inconsistent or missing data  
5 ALERT type 2 Indicator that the structure model may be wrong or deficient  
6 ALERT type 3 Indicator that the structure quality may be low  
2 ALERT type 4 Improvement, methodology, query or suggestion  
1 ALERT type 5 Informative message, check

---

It is advisable to attempt to resolve as many as possible of the alerts in all categories. Often the minor alerts point to easily fixed oversights, errors and omissions in your CIF or refinement strategy, so attention to these fine details can be worthwhile. It is up to the individual to critically assess their own results and, if necessary, seek expert advice.

**PLATON version of 26/09/2025; check.def file version of 20/09/2025**

Datablock 37-mr-20251208a - ellipsoid plot

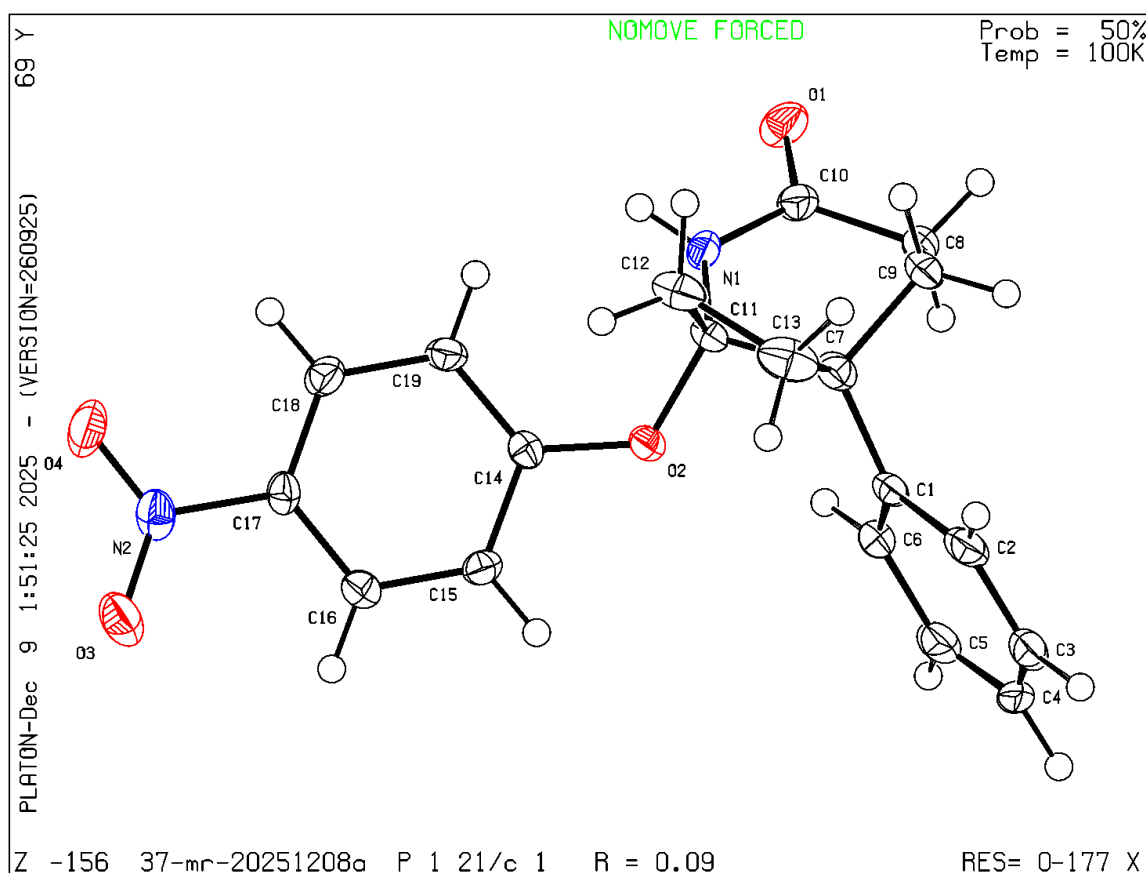



## checkCIF/PLATON report

Structure factors have been supplied for datablock(s) 38-cr-20251210a\_auto

THIS REPORT IS FOR GUIDANCE ONLY. IF USED AS PART OF A REVIEW PROCEDURE FOR PUBLICATION, IT SHOULD NOT REPLACE THE EXPERTISE OF AN EXPERIENCED CRYSTALLOGRAPHIC REFEREE.

No syntax errors found.      CIF dictionary      Interpreting this report

### Datablock: 38-cr-20251210a\_auto

---

Bond precision:    C-C = 0.0019 Å

Wavelength=1.54184

Cell:                    a=8.2063 (3)                    b=10.2047 (3)                    c=12.6923 (4)  
                          alpha=78.524 (3)                beta=77.279 (3)                gamma=69.660 (3)  
Temperature:            100 K

|                        | Calculated               | Reported                     |
|------------------------|--------------------------|------------------------------|
| Volume                 | 963.41 (6)               | 963.41 (6)                   |
| Space group            | P -1                     | P -1                         |
| Hall group             | -P 1                     | -P 1                         |
| Moiety formula         | 2(C22 H22 N2 O), C D C13 | C22 H22 N2 O, 0.5(C C13 D)   |
| Sum formula            | C45 H44 D C13 N4 O2      | C22.50 H22 C11.50 D0.50 N2 O |
| Mr                     | 781.20                   | 390.60                       |
| Dx, g cm <sup>-3</sup> | 1.347                    | 1.346                        |
| Z                      | 1                        | 2                            |
| Mu (mm <sup>-1</sup> ) | 2.501                    | 2.501                        |
| F000                   | 410.0                    | 410.0                        |
| F000'                  | 412.08                   |                              |
| h, k, lmax             | 10, 12, 15               | 10, 12, 15                   |
| Nref                   | 3986                     | 3868                         |
| Tmin, Tmax             | 0.606, 0.705             | 0.746, 1.000                 |
| Tmin'                  | 0.549                    |                              |

Correction method= # Reported T Limits: Tmin=0.746 Tmax=1.000  
AbsCorr = MULTI-SCAN

Data completeness= 0.970

Theta(max)= 75.236

R(reflections)= 0.0397( 3550)

wR2(reflections)=  
0.1071( 3868)

S = 1.066

Npar= 263

---

The following ALERTS were generated. Each ALERT has the format

**test-name\_ALERT\_alert-type\_alert-level.**

Click on the hyperlinks for more details of the test.

---

● **Alert level C**

|                   |                                                    |                |              |
|-------------------|----------------------------------------------------|----------------|--------------|
| PLAT041_ALERT_1_C | Calc. and Reported SumFormula                      | Strings Differ | Please Check |
|                   | Calc: C45 H44 D C13 N4 O2                          |                |              |
|                   | Rep.: C22.50 H22 C11.50 D0.50 N2 O                 |                |              |
| PLAT042_ALERT_1_C | Calc. and Reported MoietyFormula                   | Strings Differ | Please Check |
|                   | Calc: 2(C22 H22 N2 O), C D C13                     |                |              |
|                   | Rep.: C22 H22 N2 O, 0.5(C C13 D)                   |                |              |
| PLAT410_ALERT_2_C | Short Intra H...H Contact                          | H14B ..H18     | 1.92 Ang.    |
|                   |                                                    | x,y,z =        | 1_555 Check  |
| PLAT790_ALERT_4_C | Centre of Gravity not Within Unit-Cell:            | Resd. #        | 1 Note       |
|                   | C22 H22 N2 O                                       |                |              |
| PLAT911_ALERT_3_C | Missing FCF Refl Between Thmin & STh/L=            | 0.600          | 20 Report    |
|                   | -1 0 1, 8 6 7, 1 -1 9, -1 8 10, 0 9 10, 3 0 11,    |                |              |
|                   | -1 7 11, 0 7 11, -1 8 11, 0 8 11, 1 9 11, -1 6 12, |                |              |
|                   | -1 7 12, 0 7 12, 1 8 12, 2 9 12, 0 6 13, 1 7 13,   |                |              |
|                   | 2 8 13, 1 6 14,                                    |                |              |

---

● **Alert level G**

|                   |                                                  |                             |              |
|-------------------|--------------------------------------------------|-----------------------------|--------------|
| PLAT003_ALERT_2_G | Number of Uiso or U(i,j)                         | Restrained non-H-Atoms      | 1 Report     |
| PLAT007_ALERT_5_G | Number of Unrefined Donor-H Atoms                | .....                       | 1 Report     |
|                   | H2                                               |                             |              |
| PLAT045_ALERT_1_G | Calculated and Reported Z Differ by a Factor     | ...                         | 0.500 Check  |
| PLAT154_ALERT_1_G | The s.u.'s on the Cell Angles are Equal          | ..(Note)                    | 0.003 Degree |
| PLAT299_ALERT_4_G | Atom Site Occupancy Constrained at               | .....                       | 0.5 Check    |
|                   | C11 C12 C13 C23 D23                              |                             |              |
| PLAT302_ALERT_4_G | Anion/Solvent/Minor-Residue Disorder             | (Resd 2)                    | 100% Note    |
| PLAT304_ALERT_4_G | Non-Integer Number of Atoms in                   | ..... (Resd 2)              | 2.50 Check   |
| PLAT789_ALERT_4_G | Atoms with Negative                              | _atom_site_disorder_group # | 5 Check      |
| PLAT793_ALERT_4_G | Model has Chirality at C13                       | (Centro SpGr)               | S Verify     |
| PLAT793_ALERT_4_G | Model has Chirality at C16                       | (Centro SpGr)               | R Verify     |
| PLAT822_ALERT_4_G | CIF-embedded .res Contains Negative PART Numbers |                             | 1 Check      |
| PLAT912_ALERT_4_G | Missing # of FCF Reflections Above STh/L=        | 0.600                       | 98 Note      |
| PLAT941_ALERT_3_G | Average HKL Measurement Multiplicity             | .....                       | 3.9 Low      |
| PLAT969_ALERT_5_G | The 'Henn et al.' R-Factor-gap value             | .....                       | 4.353 Note   |
|                   | Predicted wR2: Based on SigI**2                  | 2.46 or SHELX Weight        | 10.05        |
| PLAT978_ALERT_2_G | Number C-C Bonds with Positive Residual Density. |                             | 11 Info      |

---

- 0 **ALERT level A** = Most likely a serious problem - resolve or explain  
0 **ALERT level B** = A potentially serious problem, consider carefully  
5 **ALERT level C** = Check. Ensure it is not caused by an omission or oversight  
15 **ALERT level G** = General information/check it is not something unexpected

- 4 ALERT type 1 CIF construction/syntax error, inconsistent or missing data
- 3 ALERT type 2 Indicator that the structure model may be wrong or deficient
- 2 ALERT type 3 Indicator that the structure quality may be low
- 9 ALERT type 4 Improvement, methodology, query or suggestion
- 2 ALERT type 5 Informative message, check

It is advisable to attempt to resolve as many as possible of the alerts in all categories. Often the minor alerts point to easily fixed oversights, errors and omissions in your CIF or refinement strategy, so attention to these fine details can be worthwhile. It is up to the individual to critically assess their own results and, if necessary, seek expert advice.

**PLATON version of 26/09/2025; check.def file version of 20/09/2025**

Datablock 38-cr-20251210a\_auto - ellipsoid plot

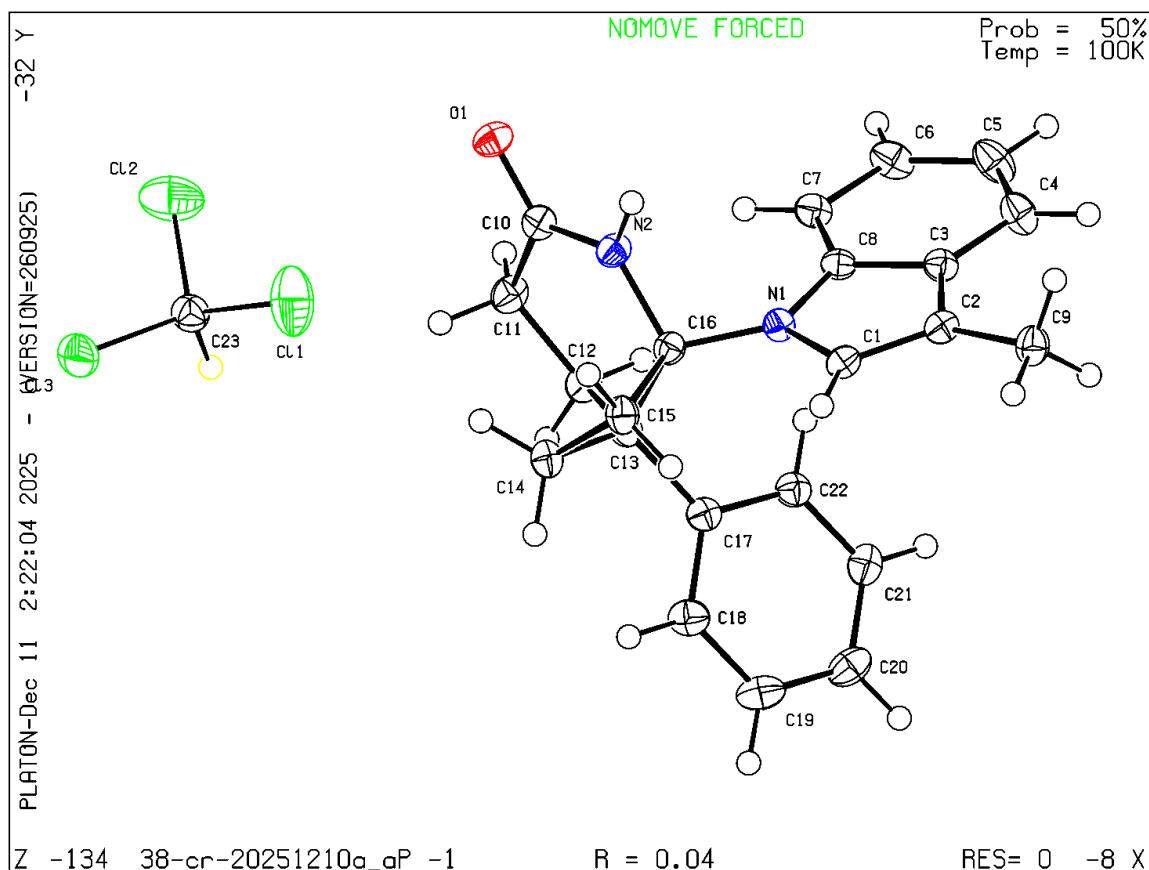



## checkCIF/PLATON report

Structure factors have been supplied for datablock(s) 37-mr-20251210b\_auto

THIS REPORT IS FOR GUIDANCE ONLY. IF USED AS PART OF A REVIEW PROCEDURE FOR PUBLICATION, IT SHOULD NOT REPLACE THE EXPERTISE OF AN EXPERIENCED CRYSTALLOGRAPHIC REFEREE.

No syntax errors found.      CIF dictionary      Interpreting this report

### Datablock: 37-mr-20251210b\_auto

---

Bond precision:    C-C = 0.0029 Å

Wavelength=0.71073

Cell:                    a=14.5636(2)            b=19.4453(3)            c=21.1345(2)

                          alpha=90                beta=91.2433(11)        gamma=90

Temperature:            100 K

|                        | Calculated                  | Reported                    |
|------------------------|-----------------------------|-----------------------------|
| Volume                 | 5983.75(14)                 | 5983.74(13)                 |
| Space group            | P 21/n                      | P 1 21/n 1                  |
| Hall group             | -P 2yn                      | -P 2yn                      |
| Moiety formula         | 2(C25 H24 N2 O), 5(C D Cl3) | 2(C25 H24 N2 O), 5(C Cl3 D) |
| Sum formula            | C55 H48 D5 Cl15 N4 O2       | C55 H48 Cl15 D5 N4 O2       |
| Mr                     | 1338.77                     | 1338.79                     |
| Dx, g cm <sup>-3</sup> | 1.486                       | 1.486                       |
| Z                      | 4                           | 4                           |
| Mu (mm <sup>-1</sup> ) | 0.734                       | 0.734                       |
| F000                   | 2728.0                      | 2728.0                      |
| F000'                  | 2737.58                     |                             |
| h, k, lmax             | 18, 24, 26                  | 18, 24, 26                  |
| Nref                   | 12231                       | 12220                       |
| Tmin, Tmax             | 0.884, 0.922                | 0.571, 1.000                |
| Tmin'                  | 0.863                       |                             |

Correction method= # Reported T Limits: Tmin=0.571 Tmax=1.000

AbsCorr = MULTI-SCAN

Data completeness= 0.999

Theta(max)= 26.371

R(reflections)= 0.0401( 10776)

wR2(reflections)=  
0.1079( 12220)

S = 1.034

Npar= 760

---

The following ALERTS were generated. Each ALERT has the format

**test-name\_ALERT\_alert-type\_alert-level.**

Click on the hyperlinks for more details of the test.

---

### ● Alert level C

|                   |                                                  |         |        |        |        |
|-------------------|--------------------------------------------------|---------|--------|--------|--------|
| PLAT041_ALERT_1_C | Calc. and Reported SumFormula                    | Strings | Differ | Please | Check  |
|                   | Calc: C55 H48 D5 Cl15 N4 O2                      |         |        |        |        |
|                   | Rep.: C55 H48 Cl15 D5 N4 O2                      |         |        |        |        |
| PLAT042_ALERT_1_C | Calc. and Reported MoietyFormula                 | Strings | Differ | Please | Check  |
|                   | Calc: 2(C25 H24 N2 O), 5(C D Cl3)                |         |        |        |        |
|                   | Rep.: 2(C25 H24 N2 O), 5(C Cl3 D)                |         |        |        |        |
| PLAT244_ALERT_4_C | Low 'Solvent' Ueq as Compared to Neighbors of    |         |        | C54    | Check  |
| PLAT410_ALERT_2_C | Short Intra H...H Contact H5B                    | ..H21   | .      | 1.91   | Ang.   |
|                   |                                                  | x,y,z = |        | 1_555  | Check  |
| PLAT410_ALERT_2_C | Short Intra H...H Contact H30A                   | ..H50   | .      | 1.91   | Ang.   |
|                   |                                                  | x,y,z = |        | 1_555  | Check  |
| PLAT790_ALERT_4_C | Centre of Gravity not Within Unit-Cell: Resd. #  |         |        | 1      | Note   |
|                   | C25 H24 N2 O                                     |         |        |        |        |
| PLAT911_ALERT_3_C | Missing FCF Refl Between Thmin & STh/L=          | 0.600   |        | 8      | Report |
|                   | 1 1 0, 0 2 0, 1 1 1, 0 0 2, 8 2 5, 3 9 7,        |         |        |        |        |
|                   | 3 8 8, -4 6 9,                                   |         |        |        |        |
| PLAT918_ALERT_3_C | Reflection(s) with I(obs) much Smaller I(calc) . |         |        | 2      | Check  |
|                   | 1 0 1, -1 1 1,                                   |         |        |        |        |

---

### ● Alert level G

|                   |                                                  |              |   |         |        |
|-------------------|--------------------------------------------------|--------------|---|---------|--------|
| PLAT002_ALERT_2_G | Number of Distance or Angle Restraints on AtSite |              |   | 12      | Note   |
| PLAT003_ALERT_2_G | Number of Uiso or U(i,j) Restrained non-H-Atoms  |              |   | 19      | Report |
| PLAT007_ALERT_5_G | Number of Unrefined Donor-H Atoms .....          |              |   | 2       | Report |
|                   | H1 H3                                            |              |   |         |        |
| PLAT083_ALERT_2_G | SHELXL Second Parameter in WGHT Unusually Large  |              |   | 7.16    | Why ?  |
| PLAT143_ALERT_4_G | s.u. on c - Axis Small or Missing .....          |              |   | 0.00020 | Ang.   |
| PLAT172_ALERT_4_G | The CIF-Embedded .res File Contains DFIX Records |              |   | 13      | Report |
| PLAT178_ALERT_4_G | The CIF-Embedded .res File Contains SIMU Records |              |   | 1       | Report |
| PLAT186_ALERT_4_G | The CIF-Embedded .res File Contains ISOR Records |              |   | 1       | Report |
| PLAT188_ALERT_3_G | A Non-default SIMU Restraint Value has been used |              |   | 0.0100  | Report |
| PLAT302_ALERT_4_G | Anion/Solvent/Minor-Residue Disorder (Resd 4)    |              |   | 100%    | Note   |
| PLAT302_ALERT_4_G | Anion/Solvent/Minor-Residue Disorder (Resd 8)    |              |   | 100%    | Note   |
| PLAT302_ALERT_4_G | Anion/Solvent/Minor-Residue Disorder (Resd 9)    |              |   | 100%    | Note   |
| PLAT304_ALERT_4_G | Non-Integer Number of Atoms in ..... (Resd 4)    |              |   | 2.80    | Check  |
| PLAT304_ALERT_4_G | Non-Integer Number of Atoms in ..... (Resd 8)    |              |   | 1.14    | Check  |
| PLAT304_ALERT_4_G | Non-Integer Number of Atoms in ..... (Resd 9)    |              |   | 1.05    | Check  |
| PLAT431_ALERT_2_G | Short Inter HL..A Contact Cl6                    | ..O1         | . | 3.15    | Ang.   |
|                   |                                                  | 1+x,y,z =    |   | 1_655   | Check  |
| PLAT432_ALERT_2_G | Short Inter X...Y Contact Cl3B                   | ..C37        | . | 3.10    | Ang.   |
|                   |                                                  | -x,1-y,1-z = |   | 3_566   | Check  |
| PLAT432_ALERT_2_G | Short Inter X...Y Contact Cl3B                   | ..C36        | . | 3.18    | Ang.   |

|                   |                                                    |                                |                 |       |        |
|-------------------|----------------------------------------------------|--------------------------------|-----------------|-------|--------|
| PLAT434_ALERT_2_G | Short Inter HL..HL Contact C12                     | -x,1-y,1-z =<br>..C15B         | =               | 3_566 | Check  |
|                   |                                                    |                                |                 | 3.26  | Ang.   |
| PLAT434_ALERT_2_G | Short Inter HL..HL Contact C12                     | -1/2+x,3/2-y,1/2+z =<br>..C115 | =               | 4_576 | Check  |
|                   |                                                    |                                |                 | 3.37  | Ang.   |
| PLAT434_ALERT_2_G | Short Inter HL..HL Contact C19                     | -1/2+x,3/2-y,1/2+z =<br>..C114 | =               | 4_576 | Check  |
|                   |                                                    |                                |                 | 3.34  | Ang.   |
|                   |                                                    | x,y,z =                        |                 | 1_555 | Check  |
| PLAT790_ALERT_4_G | Centre of Gravity not Within Unit-Cell:            | Resd. #                        |                 | 2     | Note   |
|                   | C25 H24 N2 O                                       |                                |                 |       |        |
| PLAT790_ALERT_4_G | Centre of Gravity not Within Unit-Cell:            | Resd. #                        |                 | 3     | Note   |
|                   | C D C13                                            |                                |                 |       |        |
| PLAT790_ALERT_4_G | Centre of Gravity not Within Unit-Cell:            | Resd. #                        |                 | 7     | Note   |
|                   | C D C13                                            |                                |                 |       |        |
| PLAT793_ALERT_4_G | Model has Chirality at C4                          | (Centro SpGr)                  |                 | S     | Verify |
| PLAT793_ALERT_4_G | Model has Chirality at C7                          | (Centro SpGr)                  |                 | R     | Verify |
| PLAT793_ALERT_4_G | Model has Chirality at C29                         | (Centro SpGr)                  |                 | R     | Verify |
| PLAT793_ALERT_4_G | Model has Chirality at C32                         | (Centro SpGr)                  |                 | S     | Verify |
| PLAT860_ALERT_3_G | Number of Least-Squares Restraints .....           |                                |                 | 307   | Note   |
| PLAT910_ALERT_3_G | Missing FCF Reflection(s) Below Theta (Min) [Deg]= |                                |                 | 1.72  | Note   |
|                   | -1 0 1, 0 1 1,                                     |                                |                 |       |        |
| PLAT912_ALERT_4_G | Missing # of FCF Reflections Above STh/L=          | 0.600                          |                 | 1     | Note   |
| PLAT933_ALERT_2_G | Number of HKL-OMIT Records in Embedded .res File   |                                |                 | 3     | Note   |
|                   | 0 0 2, 0 2 0, 1 1 0,                               |                                |                 |       |        |
| PLAT941_ALERT_3_G | Average HKL Measurement Multiplicity .....         |                                |                 | 4.7   | Low    |
| PLAT969_ALERT_5_G | The 'Henn et al.' R-Factor-gap value .....         |                                |                 | 3.684 | Note   |
|                   | Predicted wR2: Based on SigI**2                    | 2.93                           | or SHELX Weight | 10.44 |        |
| PLAT978_ALERT_2_G | Number C-C Bonds with Positive Residual Density.   |                                |                 | 5     | Info   |

---

0 **ALERT level A** = Most likely a serious problem - resolve or explain  
 0 **ALERT level B** = A potentially serious problem, consider carefully  
 8 **ALERT level C** = Check. Ensure it is not caused by an omission or oversight  
 35 **ALERT level G** = General information/check it is not something unexpected

2 ALERT type 1 CIF construction/syntax error, inconsistent or missing data  
 13 ALERT type 2 Indicator that the structure model may be wrong or deficient  
 6 ALERT type 3 Indicator that the structure quality may be low  
 20 ALERT type 4 Improvement, methodology, query or suggestion  
 2 ALERT type 5 Informative message, check

---

It is advisable to attempt to resolve as many as possible of the alerts in all categories. Often the minor alerts point to easily fixed oversights, errors and omissions in your CIF or refinement strategy, so attention to these fine details can be worthwhile. It is up to the individual to critically assess their own results and, if necessary, seek expert advice.

---

**PLATON version of 26/09/2025; check.def file version of 20/09/2025**

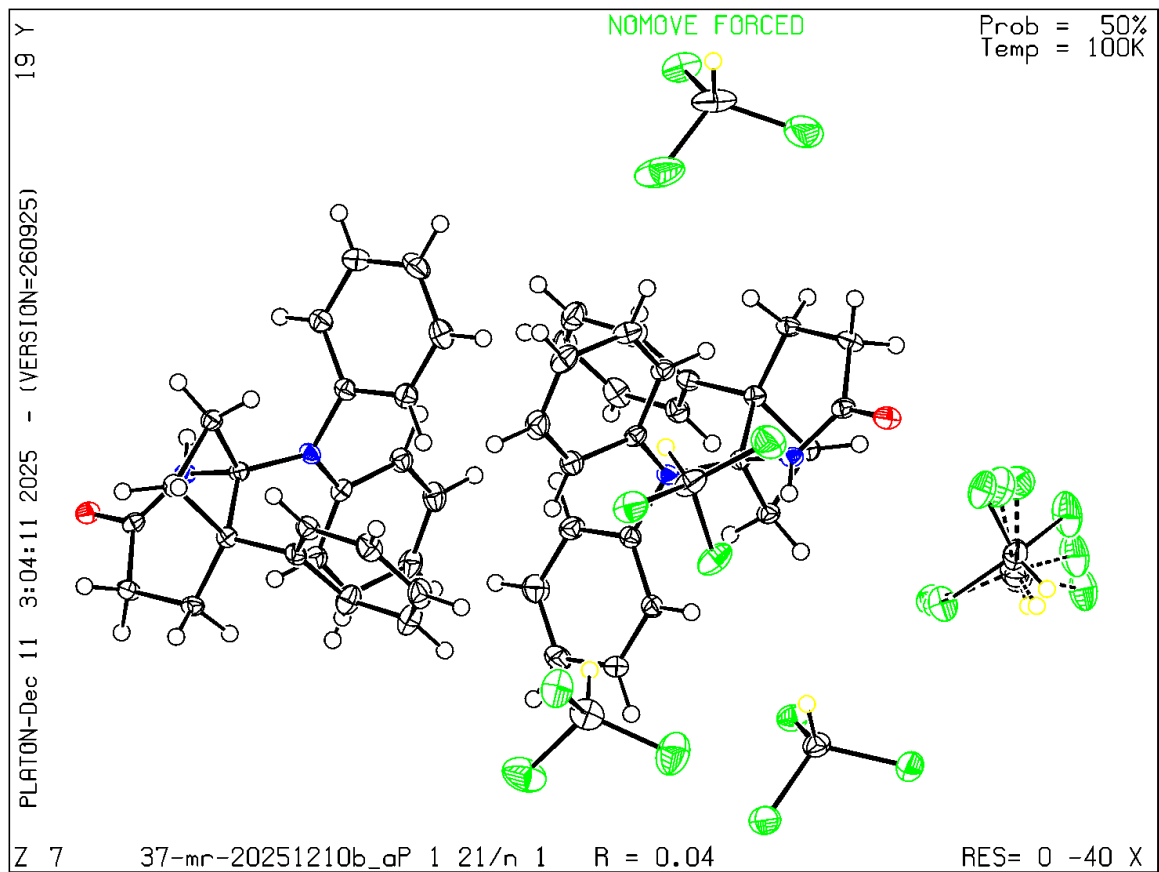



## checkCIF/PLATON report

Structure factors have been supplied for datablock(s) 38-cr-20251205b\_auto

THIS REPORT IS FOR GUIDANCE ONLY. IF USED AS PART OF A REVIEW PROCEDURE FOR PUBLICATION, IT SHOULD NOT REPLACE THE EXPERTISE OF AN EXPERIENCED CRYSTALLOGRAPHIC REFEREE.

No syntax errors found.      CIF dictionary      Interpreting this report

### Datablock: 38-cr-20251205b\_auto

---

|                        |                           |                                    |                           |
|------------------------|---------------------------|------------------------------------|---------------------------|
| Bond precision:        | C-C = 0.0030 Å            | Wavelength=1.54184                 |                           |
| Cell:                  | a=11.0004 (2)<br>alpha=90 | b=11.4646 (2)<br>beta=92.6991 (16) | c=13.3602 (2)<br>gamma=90 |
| Temperature:           | 100 K                     |                                    |                           |
|                        | Calculated                | Reported                           |                           |
| Volume                 | 1683.06 (5)               | 1683.06 (6)                        |                           |
| Space group            | P 21                      | P 1 21 1                           |                           |
| Hall group             | P 2yb                     | P 2yb                              |                           |
| Moiety formula         | C22 H22 N2 O2             | 2 (C22 H22 N2 O2)                  |                           |
| Sum formula            | C22 H22 N2 O2             | C44 H44 N4 O4                      |                           |
| Mr                     | 346.42                    | 692.83                             |                           |
| Dx, g cm <sup>-3</sup> | 1.367                     | 1.367                              |                           |
| Z                      | 4                         | 2                                  |                           |
| Mu (mm <sup>-1</sup> ) | 0.700                     | 0.700                              |                           |
| F000                   | 736.0                     | 736.0                              |                           |
| F000'                  | 738.11                    |                                    |                           |
| h, k, lmax             | 13, 14, 16                | 13, 14, 16                         |                           |
| Nref                   | 6999 [ 3681]              | 6557                               |                           |
| Tmin, Tmax             | 0.874, 0.926              | 0.783, 1.000                       |                           |
| Tmin'                  | 0.869                     |                                    |                           |

Correction method= # Reported T Limits: Tmin=0.783 Tmax=1.000  
AbsCorr = MULTI-SCAN

Data completeness= 1.78/0.94                    Theta(max)= 75.646

R(reflections)= 0.0322( 6368)

wR2(reflections)=  
0.0860( 6557)

S = 1.044

Npar= 477

---

The following ALERTS were generated. Each ALERT has the format

**test-name\_ALERT\_alert-type\_alert-level.**

Click on the hyperlinks for more details of the test.

---

● **Alert level C**

|                   |                                         |                 |              |
|-------------------|-----------------------------------------|-----------------|--------------|
| PLAT041_ALERT_1_C | Calc. and Reported SumFormula           | Strings Differ  | Please Check |
|                   | Calc: C22 H22 N2 O2                     |                 |              |
|                   | Rep.: C44 H44 N4 O4                     |                 |              |
| PLAT042_ALERT_1_C | Calc. and Reported MoietyFormula        | Strings Differ  | Please Check |
|                   | Calc: C22 H22 N2 O2                     |                 |              |
|                   | Rep.: 2(C22 H22 N2 O2)                  |                 |              |
| PLAT411_ALERT_2_C | Short Inter H...H Contact               | H7 ..H37B .     | 2.08 Ang.    |
|                   |                                         | -x,-1/2+y,1-z = | 2_546 Check  |
| PLAT911_ALERT_3_C | Missing FCF Refl Between Thmin & STh/L= | 0.600           | 3 Report     |
|                   | 4 0 15, -1 0 16, 0 0 16,                |                 |              |

---

● **Alert level G**

|                   |                                                  |                      |            |
|-------------------|--------------------------------------------------|----------------------|------------|
| PLAT002_ALERT_2_G | Number of Distance or Angle Restraints on AtSite |                      | 4 Note     |
| PLAT045_ALERT_1_G | Calculated and Reported Z Differ by a Factor ... |                      | 2 Check    |
| PLAT172_ALERT_4_G | The CIF-Embedded .res File Contains DFIX Records |                      | 1 Report   |
| PLAT791_ALERT_4_G | Model has Chirality at C10                       | (Sohncke SpGr)       | S Verify   |
| PLAT791_ALERT_4_G | Model has Chirality at C14                       | (Sohncke SpGr)       | R Verify   |
| PLAT791_ALERT_4_G | Model has Chirality at C32                       | (Sohncke SpGr)       | R Verify   |
| PLAT791_ALERT_4_G | Model has Chirality at C33                       | (Sohncke SpGr)       | S Verify   |
| PLAT860_ALERT_3_G | Number of Least-Squares Restraints .....         |                      | 3 Note     |
| PLAT912_ALERT_4_G | Missing # of FCF Reflections Above STh/L=        | 0.600                | 75 Note    |
| PLAT933_ALERT_2_G | Number of HKL-OMIT Records in Embedded .res File |                      | 1 Note     |
|                   | 11 2 9,                                          |                      |            |
| PLAT969_ALERT_5_G | The 'Henn et al.' R-Factor-gap value .....       |                      | 2.953 Note |
|                   | Predicted wR2: Based on SigI**2                  | 2.91 or SHELX Weight | 8.23       |
| PLAT978_ALERT_2_G | Number C-C Bonds with Positive Residual Density. |                      | 20 Info    |
| PLAT992_ALERT_5_G | Repd & Actual _reflns_number_gt Values Differ by |                      | 2 Check    |

---

0 **ALERT level A** = Most likely a serious problem - resolve or explain  
0 **ALERT level B** = A potentially serious problem, consider carefully  
4 **ALERT level C** = Check. Ensure it is not caused by an omission or oversight  
13 **ALERT level G** = General information/check it is not something unexpected

3 ALERT type 1 CIF construction/syntax error, inconsistent or missing data  
4 ALERT type 2 Indicator that the structure model may be wrong or deficient  
2 ALERT type 3 Indicator that the structure quality may be low  
6 ALERT type 4 Improvement, methodology, query or suggestion  
2 ALERT type 5 Informative message, check

---

---

It is advisable to attempt to resolve as many as possible of the alerts in all categories. Often the minor alerts point to easily fixed oversights, errors and omissions in your CIF or refinement strategy, so attention to these fine details can be worthwhile. It is up to the individual to critically assess their own results and, if necessary, seek expert advice.

**PLATON version of 26/09/2025; check.def file version of 20/09/2025**

Datablock 38-cr-20251205b\_auto - ellipsoid plot

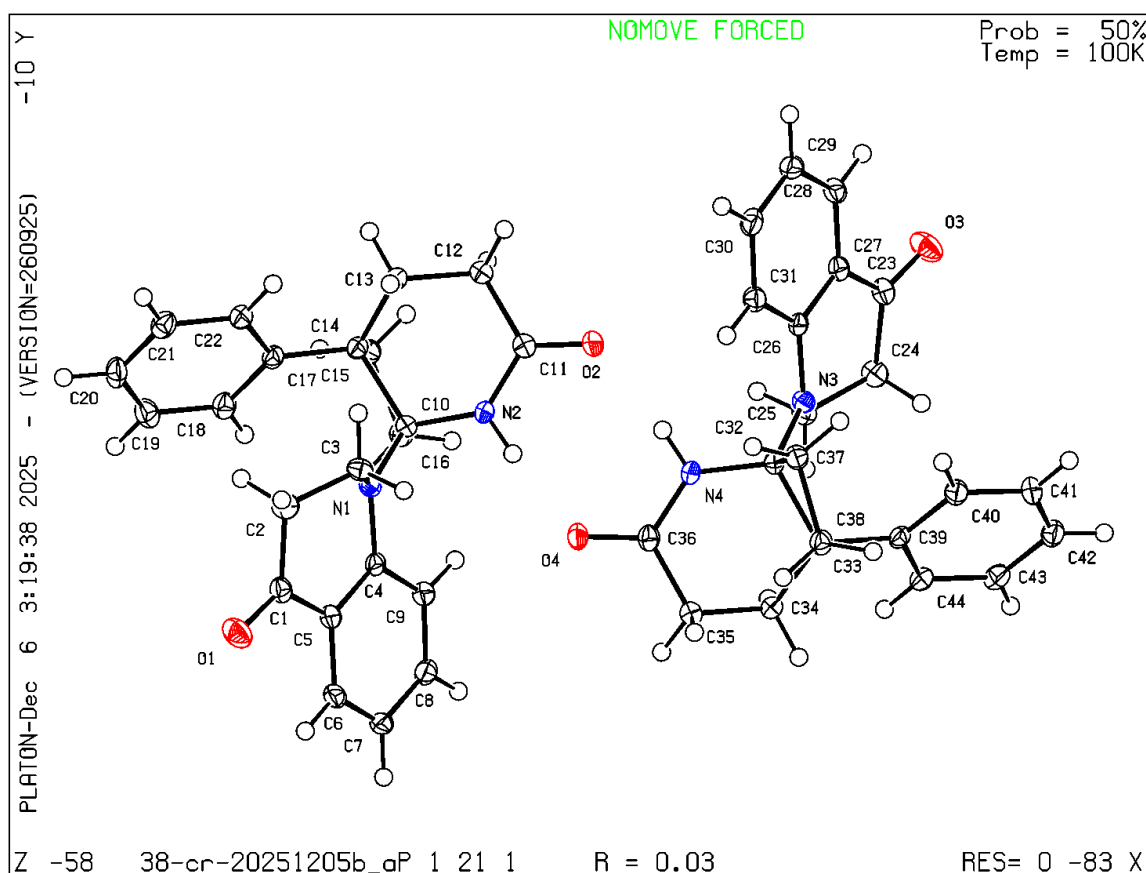

Supplement: Supplementary file 1 [file fed788077ba1a19c58a1627a.pdf]
